# Supplementary material
Source: PubMed Central journal article supplement (PMC2782455)
Supplement: NIHMS100614-supplement-7.pdf [file NIHMS100614-supplement-7.pdf]

**Supplementary table 1. List of significant expression profiles of wt cells irradiated with 0.6J/m<sup>2</sup> of UV (gray color) as compared to non-irradiated wt controls**

| code         | Gene Title                                                                             | Symbol        | WT_0.6J/m <sup>2</sup> | p     | WT_4J/m <sup>2</sup> | p     | XPA_0.6J/m <sup>2</sup> | p     | CSB_0.6J/m <sup>2</sup> | p     | DKO_0.6J/m <sup>2</sup> | p     |
|--------------|----------------------------------------------------------------------------------------|---------------|------------------------|-------|----------------------|-------|-------------------------|-------|-------------------------|-------|-------------------------|-------|
| 1456774_at   | protein phosphatase 1, regulatory (inhibitor) subunit 13 like                          | Ppp1r13l      | 6.79                   | 0.026 | 6.29                 | 0.202 | 2.21                    | 0.379 | 2.14                    | 0.178 | 1.03                    | 0.879 |
| 1422745_at   | bicaudal D homolog 2 (Drosophila)                                                      | Bicd2         | 5.75                   | 0.050 | 8.26                 | 0.071 | 1.32                    | 0.251 | -1.12                   | 0.481 | -1.34                   | 0.131 |
| 1438210_at   | G protein-coupled receptor 149                                                         | Gpr149        | 4.65                   | 0.049 | 2.79                 | 0.377 | 1.13                    | 0.547 | -1.27                   | 0.134 | 1.03                    | 0.916 |
| 1417000_at   | ankyrin repeat and BTB (POZ) domain containing 1                                       | Abtb1         | 4.61                   | 0.036 | 3.54                 | 0.007 | -1.44                   | 0.121 | -1.23                   | 0.140 | 1.4                     | 0.215 |
| 1453058_at   | WD repeat domain 5B                                                                    | Wdr5b         | 4.53                   | 0.030 | 2.81                 | 0.166 | -1.39                   | 0.014 | -1.03                   | 0.419 | -1.09                   | 0.381 |
| 1452606_at   | meiotic nuclear divisions 1 homolog (S. cerevisiae)                                    | Mnd1          | 4.48                   | 0.001 | 3.89                 | 0.279 | -1.22                   | 0.305 | 1.18                    | 0.567 | 1.8                     | 0.793 |
| 1436832_at   | RIKEN cDNA 1110067B18 gene                                                             | 1110067B18Rik | 4.46                   | 0.035 | 1.98                 | 0.794 | -1.33                   | 0.380 | 3.45                    | 0.121 | 1.62                    | 0.850 |
| 1443301_at   | RIKEN cDNA C230086A09 gene                                                             | C230086A09Rik | 4.38                   | 0.004 | 1.87                 | 0.201 | -1.14                   | 0.473 | -1.17                   | 0.491 | 1.29                    | 0.830 |
| 1443537_at   | RIKEN cDNA C130009A20 gene                                                             | C130009A20Rik | 4.23                   | 0.012 | 1.88                 | 0.266 | 1.62                    | 0.282 | 1.31                    | 0.745 | 1.07                    | 0.710 |
| 1440355_at   | potassium channel tetramerisation domain containing 12b                                | Kctd12b       | 4.08                   | 0.046 | 2                    | 0.164 | 2.26                    | 0.033 | 1.2                     | 0.944 | -1.19                   | 0.560 |
| 1446261_at   | DNA segment, Chr 1, ERATO Doi 507, expressed                                           | D1Erd507e     | 4.05                   | 0.002 | 3.12                 | 0.745 | -1.21                   | 0.473 | 1                       | 0.815 | -1.37                   | 0.351 |
| 1457274_at   | hypothetical protein E330017N17                                                        | E330017N17    | 4.03                   | 0.032 | 4.89                 | 0.299 | -1.18                   | 0.477 | -1.69                   | 0.131 | 1.16                    | 0.844 |
| 1425990_a_at | nuclear factor of activated T-cells, cytoplasmic, calcineurin-dependent ; Nfatc2       | Nfatc2        | 3.95                   | 0.018 | 4.4                  | 0.033 | -1.08                   | 0.457 | -1.05                   | 0.590 | -1.35                   | 0.304 |
| 1421273_at   | suppressor of cytokine signaling 4                                                     | Socs4         | 3.93                   | 0.031 | 3.39                 | 0.026 | 1.14                    | 0.671 | 1.34                    | 0.181 | 1.58                    | 0.297 |
| 1444329_at   | glutamine fructose-6-phosphate transaminase 1                                          | Gfpt1         | 3.92                   | 0.039 | 1.67                 | 0.476 | 1.6                     | 0.601 | 1.23                    | 0.801 | 1.54                    | 0.810 |
| 1430215_at   | RIKEN cDNA 2610020H08 gene                                                             | 2610020H08Rik | 3.84                   | 0.024 | 2.53                 | 0.118 | 1                       | 0.849 | 1.07                    | 0.746 | -1.05                   | 0.568 |
| 1443920_at   | coiled-coil domain containing 66                                                       | Ccdc66        | 3.76                   | 0.041 | 1.32                 | 0.628 | 1.61                    | 0.633 | 2.13                    | 0.402 | 1.45                    | 0.993 |
| 1450329_a_at | arrestin 3, retinal                                                                    | Arr3          | 3.75                   | 0.018 | 2.32                 | 0.023 | 1.24                    | 0.454 | 1.06                    | 0.689 | 1.26                    | 0.695 |
| 1422177_at   | interleukin 13 receptor, alpha 2                                                       | Il13ra2       | 3.7                    | 0.046 | 3.68                 | 0.027 | 1.37                    | 0.724 | 2.26                    | 0.526 | 2.07                    | 0.052 |
| 1424245_at   | carboxylesterase 2 /// similar to carboxylesterase 2                                   | Ces2          | 3.68                   | 0.029 | 1.06                 | 0.845 | 1.07                    | 0.501 | -1.34                   | 0.258 | 1.58                    | 0.059 |
| 1433099_at   | RIKEN cDNA 4933428L12 gene                                                             | 4933428L12Rik | 3.65                   | 0.044 | 2.21                 | 0.644 | 1.54                    | 0.525 | 2.8                     | 0.128 | 2.34                    | 0.102 |
| 1453926_at   | RAD54 like (S. cerevisiae)                                                             | Rad54l        | 3.64                   | 0.017 | -1.07                | 0.403 | 1.1                     | 0.812 | 1.24                    | 0.332 | 1                       | 0.619 |
| 1422011_s_at | X-linked lymphocyte-regulated complex /// RIKEN cDNA 3830403N18 c Xlr                  |               | 3.62                   | 0.021 | 3.3                  | 0.064 | 1.07                    | 0.860 | 1.01                    | 0.377 | -1.16                   | 0.457 |
| 1453537_a_at | WD repeat domain 17                                                                    | Wdr17         | 3.6                    | 0.032 | 1.89                 | 0.417 | 1.28                    | 0.818 | 4.11                    | 0.313 | 1.63                    | 0.109 |
| 1419751_x_at | cDNA sequence AB056442                                                                 | AB056442      | 3.57                   | 0.005 | 2.81                 | 0.150 | 1.83                    | 0.843 | 2.45                    | 0.663 | 1.51                    | 0.782 |
| 1425942_a_at | glycoprotein m6b                                                                       | Gpm6b         | 3.55                   | 0.039 | 2.88                 | 0.316 | -1.2                    | 0.376 | -1.09                   | 0.912 | -1.37                   | 0.025 |
| 1447675_x_at | myogenic differentiation 1                                                             | Myod1         | 3.47                   | 0.014 | 1.37                 | 0.534 | 1.99                    | 0.199 | 1.11                    | 0.533 | -1.47                   | 0.177 |
| 1443424_at   | RIKEN cDNA 2210018M11 gene                                                             | 2210018M11Rik | 3.43                   | 0.045 | 3.98                 | 0.086 | 1.23                    | 0.726 | 2.03                    | 0.101 | 1.12                    | 0.878 |
| 1445379_at   | Atpase, class VI, type 11C                                                             | Atp11c        | 3.39                   | 0.021 | 1.02                 | 0.815 | 1.54                    | 0.499 | -1.12                   | 0.192 | 1.77                    | 0.443 |
| 1443044_at   | hypothetical A830091E24                                                                | A830091E24    | 3.38                   | 0.008 | 2.03                 | 0.227 | 1.96                    | 0.895 | 1.76                    | 0.948 | 1.32                    | 0.646 |
| 1431245_at   | RIKEN cDNA 1700063H04 gene                                                             | 1700063H04Rik | 3.36                   | 0.037 | 2.39                 | 0.109 | -2.54                   | 0.069 | 2.29                    | 0.241 | -1.64                   | 0.189 |
| 1432637_at   | similar to Hippocalcin-like protein 1 (Visinin-like protein 3) (VILIP-3) (Nc LOC675539 |               | 3.33                   | 0.008 | 2.24                 | 0.497 | -1.9                    | 0.236 | -1.15                   | 0.780 | -1.65                   | 0.240 |
| 1432012_a_at | NOL1/NOP2/Sun domain family 6                                                          | Nsun6         | 3.27                   | 0.017 | 3.56                 | 0.020 | 1.36                    | 0.583 | 1.35                    | 0.022 | -1.24                   | 0.038 |
| 1448873_at   | occludin                                                                               | Ocln          | 3.26                   | 0.038 | 2.06                 | 0.501 | 1.04                    | 0.821 | 1.62                    | 0.497 | 1.11                    | 0.942 |
| 1439559_at   | RIKEN cDNA 1700040D17 gene                                                             | 1700040D17Rik | 3.26                   | 0.003 | 2.21                 | 0.361 | -1.09                   | 0.895 | 1.97                    | 0.218 | -1.15                   | 0.374 |
| 1440768_x_at | RIKEN cDNA 1700052I22 gene                                                             | 1700052I22Rik | 3.24                   | 0.006 | 1.08                 | 0.713 | -1.23                   | 0.619 | 1.52                    | 0.877 | 2.17                    | 0.293 |
| 1426509_s_at | glial fibrillary acidic protein                                                        | Gfap          | 3.2                    | 0.022 | 1.07                 | 0.639 | 1.08                    | 0.833 | -1.19                   | 0.128 | 1.78                    | 0.784 |

|              |                                                                          |               |      |       |       |       |       |       |       |       |       |       |
|--------------|--------------------------------------------------------------------------|---------------|------|-------|-------|-------|-------|-------|-------|-------|-------|-------|
| 1428604_at   | RIKEN cDNA 2610305D13 gene                                               | 2610305D13Rik | 3.19 | 0.048 | 2.3   | 0.333 | 1.08  | 0.736 | -1.36 | 0.056 | 2.31  | 0.643 |
| 1456333_a_at | Rho GTPase activating protein 6                                          | Arhgap6       | 3.18 | 0.035 | 1.84  | 0.327 | -1.64 | 0.245 | 1.5   | 0.588 | 1.93  | 0.308 |
| 1427868_x_at | myosin, heavy polypeptide 1, skeletal muscle, adult                      | Myh1          | 3.14 | 0.001 | 2.1   | 0.186 | 1.08  | 0.623 | -1.23 | 0.314 | -1.08 | 0.498 |
| 1435053_s_at | pleckstrin homology domain containing, family H (with MyTH4 domain)      | Plekhh1       | 3.13 | 0.033 | 1.14  | 0.325 | 1.58  | 0.284 | 1.14  | 0.819 | -1.41 | 0.053 |
| 1427180_at   | solute carrier family 27 (fatty acid transporter), member 3              | Slc27a3       | 3.12 | 0.001 | 1.71  | 0.509 | 1.56  | 0.846 | 1.57  | 0.467 | -1.29 | 0.383 |
| 1421924_at   | solute carrier family 2 (facilitated glucose transporter), member 3      | Slc2a3        | 3.11 | 0.046 | 1.32  | 0.291 | 1.74  | 0.494 | 1.44  | 0.074 | 3.66  | 0.332 |
| 1447685_x_at | E26 avian leukemia oncogene 2, 3' domain                                 | Ets2          | 3.1  | 0.036 | 1.44  | 0.160 | 3.25  | 0.538 | -1.73 | 0.057 | 1.45  | 0.797 |
| 1421663_at   | dehydrogenase/reductase member 2                                         | Dhrs2         | 3.1  | 0.039 | 3.75  | 0.046 | -1.12 | 0.384 | -1.15 | 0.225 | 2.13  | 0.713 |
| 1451800_at   | GRIP and coiled-coil domain containing 2                                 | Gcc2          | 3.08 | 0.001 | 3.94  | 0.007 | 1.16  | 0.810 | 1.17  | 0.792 | 1.26  | 0.928 |
| 1456777_at   | maltase-glucoamylase                                                     | Mgam          | 3.07 | 0.046 | 1.84  | 0.022 | 1.3   | 0.456 | 1.11  | 0.811 | 1.08  | 0.859 |
| 1442812_at   | similar to Anapc5 protein                                                | LOC433844     | 3.05 | 0.008 | 2.72  | 0.376 | 1.11  | 0.911 | 2     | 0.492 | 1.65  | 0.702 |
| 1440211_at   | cytochrome P450, family 2, subfamily j, polypeptide 11                   | Cyp2j11       | 3.04 | 0.042 | 3.72  | 0.134 | 1.92  | 0.418 | 1.21  | 0.579 | 4.3   | 0.784 |
| 1436647_at   | tau tubulin kinase 2                                                     | Ttk2          | 3    | 0.021 | 3.74  | 0.601 | 1.02  | 0.416 | -1.23 | 0.169 | -1.12 | 0.415 |
| 1446105_at   | exocyst complex component 1                                              | Exoc1         | 3    | 0.002 | -1.51 | 0.008 | 1.85  | 0.194 | -1.3  | 0.382 | 2.42  | 0.019 |
| 1441577_at   | RIKEN cDNA C530014P21 gene                                               | C530014P21Rik | 2.98 | 0.036 | 2.96  | 0.075 | 1.42  | 0.210 | 2.81  | 0.113 | 1.03  | 0.840 |
| 1455471_at   | RIKEN cDNA 1500012D20 gene                                               | 1500012D20Rik | 2.97 | 0.024 | 1.81  | 0.527 | -1.31 | 0.355 | 1.3   | 0.892 | 2.1   | 0.591 |
| 1433310_at   | RIKEN cDNA D530031A16 gene                                               | D530031A16Rik | 2.95 | 0.014 | 1.64  | 0.169 | 1.54  | 0.479 | -1.11 | 0.386 | -1.05 | 0.923 |
| 1448845_at   | ribonuclease P 25 subunit (human)                                        | Rpp25         | 2.94 | 0.029 | 1.29  | 0.177 | 1.91  | 0.363 | -1.16 | 0.429 | -1.31 | 0.312 |
| 1430642_at   | RIKEN cDNA 2900001G08 gene                                               | 2900001G08Rik | 2.94 | 0.030 | 1.51  | 0.715 | 1.83  | 0.090 | 1.52  | 0.544 | 2.84  | 0.606 |
| 1456770_at   | zinc finger protein 14                                                   | Zfp14         | 2.93 | 0.029 | 3     | 0.096 | 1.63  | 0.959 | 1.11  | 0.562 | 1.95  | 0.046 |
| 1429314_at   | synaptotagmin XI                                                         | Syt11         | 2.92 | 0.005 | 2.93  | 0.185 | 1.29  | 0.448 | 1.53  | 0.894 | 1.39  | 0.323 |
| 1430122_at   | RIKEN cDNA 9430002A10 gene                                               | 9430002A10Rik | 2.89 | 0.032 | -1.04 | 0.614 | 1.32  | 0.759 | 1.52  | 0.230 | 1.32  | 0.412 |
| 1457307_at   | RIKEN cDNA A330102K04 gene                                               | A330102K04Rik | 2.88 | 0.026 | 1.44  | 0.989 | 1.45  | 0.785 | 1.82  | 0.205 | 1.38  | 0.126 |
| 1457989_at   | solute carrier family 4, sodium bicarbonate transporter-like, member 11  | Slc4a11       | 2.86 | 0.007 | 3.87  | 0.068 | 1.86  | 0.056 | 1.11  | 0.700 | 1.92  | 0.439 |
| 1457308_at   | Ubiquitin specific peptidase 45                                          | Usp45         | 2.83 | 0.036 | 2.14  | 0.451 | 1.13  | 0.880 | 2.62  | 0.043 | -1.78 | 0.064 |
| 1422311_a_at | polymerase (RNA) II (DNA directed) polypeptide A                         | Polr2a        | 2.83 | 0.036 | 3.1   | 0.210 | 1.88  | 0.173 | 1.68  | 0.810 | 1.68  | 0.246 |
| 1416072_at   | CD34 antigen                                                             | Cd34          | 2.83 | 0.021 | 1.33  | 0.680 | 1.77  | 0.715 | 1.14  | 0.722 | 1.88  | 0.032 |
| 1436564_at   | Regulating synaptic membrane exocytosis 4                                | Rims4         | 2.81 | 0.045 | 2.9   | 0.288 | -1.05 | 0.609 | 2.03  | 0.396 | 1.15  | 0.051 |
| 1459277_at   | Nuclear receptor coactivator 1                                           | Ncoa1         | 2.81 | 0.036 | 3     | 0.136 | 1.53  | 0.465 | 1.18  | 0.211 | 2.11  | 0.580 |
| 1427459_at   | carboxypeptidase N, polypeptide 2                                        | Cpn2          | 2.8  | 0.015 | 1.22  | 0.338 | 2.74  | 0.162 | -1.22 | 0.252 | 3.66  | 0.010 |
| 1443613_x_at | Activating signal cointegrator 1 complex subunit 2                       | Ascc2         | 2.8  | 0.028 | 1.91  | 0.556 | -1.72 | 0.171 | -1.06 | 0.523 | 1.16  | 0.970 |
| 1435309_at   | cDNA sequence BC019943                                                   | BC019943      | 2.77 | 0.031 | 1.43  | 0.390 | 1.68  | 0.836 | 1.96  | 0.297 | 1.11  | 0.560 |
| 1427836_at   | stretch responsive protein 278                                           | Sr278         | 2.76 | 0.029 | 1.28  | 0.971 | 1.72  | 0.952 | 1.27  | 0.662 | 1.01  | 0.834 |
| 1453701_at   | RIKEN cDNA 4921515E04 gene                                               | 4921515E04Rik | 2.75 | 0.009 | 1.37  | 0.807 | -1.2  | 0.387 | 1.68  | 0.489 | -1.03 | 0.523 |
| 1447489_at   | RIKEN cDNA 1110039B18 gene                                               | 1110039B18Rik | 2.75 | 0.021 | 1.4   | 0.988 | -1.2  | 0.534 | 1.3   | 0.903 | 1.04  | 0.780 |
| 1433177_at   | RIKEN cDNA 5830411G16 gene                                               | 5830411G16Rik | 2.73 | 0.024 | 2.83  | 0.281 | 1.48  | 0.576 | 1.99  | 0.189 | 1.35  | 0.887 |
| 1443637_at   | RIKEN cDNA 2900084M01 gene                                               | 2900084M01Rik | 2.69 | 0.009 | 1.21  | 0.335 | 1.63  | 0.071 | 4     | 0.051 | 3.5   | 0.205 |
| 1451944_a_at | tumor necrosis factor (ligand) superfamily, member 11                    | Tnfsf11       | 2.63 | 0.023 | 2.72  | 0.012 | 1.17  | 0.885 | 1.63  | 0.615 | -1.14 | 0.479 |
| 1436700_a_at | DEAD (Asp-Glu-Ala-Asp) box polypeptide 48                                | Ddx48         | 2.63 | 0.002 | 1.79  | 0.274 | 1.46  | 0.967 | 1.66  | 0.220 | 1.16  | 0.826 |
| 1436227_at   | Left-right determination factor 2                                        | Lefty2        | 2.62 | 0.003 | 2.33  | 0.221 | 1.3   | 0.240 | 3.56  | 0.257 | 2.02  | 0.765 |
| 1430531_at   | biphenyl hydrolase-like (serine hydrolase, breast epithelial mucin-assor | Bphl          | 2.61 | 0.004 | 2.95  | 0.117 | 1.46  | 0.846 | 1.28  | 0.232 | -1.24 | 0.093 |

|              |                                                                                             |               |      |       |       |       |       |       |       |       |       |       |
|--------------|---------------------------------------------------------------------------------------------|---------------|------|-------|-------|-------|-------|-------|-------|-------|-------|-------|
| 1452763_at   | non imprinted in Prader-Willi/Angelman syndrome 1 homolog (human)                           | Nipa1         | 2.6  | 0.024 | 2.29  | 0.542 | -1.06 | 0.505 | 1.29  | 0.055 | -1.05 | 0.560 |
| 1445660_at   | RIKEN cDNA 2700094F01 gene                                                                  | 2700094F01Rik | 2.6  | 0.000 | 2.38  | 0.489 | 2.75  | 0.734 | 2.15  | 0.290 | -1.23 | 0.246 |
| 1440696_at   | RIKEN cDNA 2300002D11 gene                                                                  | 2300002D11Rik | 2.59 | 0.015 | 1.83  | 0.685 | -1.06 | 0.359 | -1.4  | 0.140 | -1.28 | 0.267 |
| 1433573_x_at | protease, serine, 2                                                                         | Prss2         | 2.58 | 0.035 | 3.41  | 0.145 | 1.99  | 0.272 | 1.35  | 0.063 | 1.17  | 0.577 |
| 1457648_x_at | cDNA sequence BC004044                                                                      | BC004044      | 2.58 | 0.029 | 2     | 0.498 | 1.09  | 0.847 | -1    | 0.745 | 1.95  | 0.594 |
| 1458366_at   | Additional sex combs like 2 (Drosophila)                                                    | Asxl2         | 2.57 | 0.006 | 1.45  | 0.369 | -1.66 | 0.087 | 1.73  | 0.560 | 1.02  | 0.538 |
| 1431690_at   | potassium voltage-gated channel, subfamily H (eag-related), member 3                        | Kcnh3         | 2.56 | 0.044 | 2.1   | 0.154 | -1.35 | 0.268 | 1.69  | 0.283 | 1.48  | 0.634 |
| 1442603_at   | Polybromo 1                                                                                 | Pb1           | 2.55 | 0.020 | 2.99  | 0.036 | -1.33 | 0.259 | -1.11 | 0.598 | -1.53 | 0.028 |
| 1430943_at   | RIKEN cDNA 6030498E09 gene                                                                  | 6030498E09Rik | 2.55 | 0.009 | 1.77  | 0.235 | -1.25 | 0.227 | 1.99  | 0.271 | -1.12 | 0.388 |
| 1444229_at   | nuclear receptor subfamily 2, group F, member 2                                             | Nr2f2         | 2.54 | 0.046 | 1.9   | 0.083 | 1.17  | 0.997 | 1.06  | 0.733 | 1.02  | 0.912 |
| 1442136_at   | ankyrin repeat and IBR domain containing 1                                                  | Ankib1        | 2.54 | 0.047 | 2.54  | 0.083 | 1.78  | 0.150 | 1.41  | 0.114 | -1.03 | 0.842 |
| 1444765_at   | RNA binding protein gene with multiple splicing                                             | Rbpms         | 2.51 | 0.019 | 1.54  | 0.876 | 1.22  | 0.981 | -1.69 | 0.080 | -1.61 | 0.086 |
| 1451805_at   | pleckstrin homology domain interacting protein                                              | Phip          | 2.5  | 0.015 | 1.95  | 0.163 | 2.93  | 0.244 | -1.14 | 0.358 | 2.01  | 0.661 |
| 1453393_a_at | carbohydrate (chondroitin 6/keratan) sulfotransferase 4                                     | Chst4         | 2.49 | 0.040 | 2.35  | 0.050 | -1.41 | 0.234 | -1.21 | 0.191 | 2.98  | 0.258 |
| 1446088_at   | RIKEN cDNA 9430081I23 gene                                                                  | 9430081I23Rik | 2.49 | 0.035 | 2.38  | 0.762 | -1.04 | 0.500 | 1.2   | 0.338 | -1.53 | 0.077 |
| 1429928_at   | RIKEN cDNA 1700030B21 gene                                                                  | 1700030B21Rik | 2.49 | 0.009 | 1.23  | 0.681 | -1.1  | 0.531 | 1.07  | 0.787 | 1.29  | 0.987 |
| 1443143_at   | fibronectin leucine rich transmembrane protein 3                                            | Flrt1         | 2.48 | 0.019 | 1.23  | 0.809 | -1.28 | 0.283 | 1.66  | 0.653 | 1.32  | 0.616 |
| 1452339_at   | a disintegrin-like and metallopeptidase (reprolysin type) with thrombospondin type 1 motifs | Adamts7       | 2.48 | 0.033 | 1.38  | 0.622 | 2.39  | 0.256 | 1.9   | 0.183 | 1.49  | 0.965 |
| 1432894_at   | RIKEN cDNA 9130011L11 gene                                                                  | 9130011L11Rik | 2.48 | 0.002 | 2.49  | 0.338 | -1.89 | 0.079 | -1.73 | 0.074 | 2.07  | 0.150 |
| 1421251_at   | zinc finger protein 40                                                                      | Zfp40         | 2.47 | 0.028 | 2.44  | 0.103 | -1.21 | 0.143 | 1.67  | 0.790 | -1.18 | 0.407 |
| 1456543_at   | prokineticin receptor 1                                                                     | Prokr1        | 2.46 | 0.011 | 2.45  | 0.014 | 2.2   | 0.016 | 1.66  | 0.659 | 1.22  | 0.724 |
| 1444545_at   | Erythrocyte protein band 4.1                                                                | Epb4.1        | 2.45 | 0.034 | 1.02  | 0.811 | 1.43  | 0.139 | 1.62  | 0.150 | -1.09 | 0.487 |
| 1450801_at   | a disintegrin and metallopeptidase domain 21                                                | Adam21        | 2.45 | 0.040 | -1.42 | 0.110 | 1.51  | 0.291 | -1.31 | 0.166 | 1.56  | 0.810 |
| 1431979_at   | RIKEN cDNA 4930444M15 gene                                                                  | 4930444M15Rik | 2.45 | 0.040 | 1.32  | 0.127 | 1.03  | 0.638 | 1.38  | 0.176 | -1.15 | 0.369 |
| 1450753_at   | natural killer cell group 7 sequence                                                        | Nkg7          | 2.44 | 0.049 | 3.86  | 0.385 | -1.69 | 0.154 | 1.37  | 0.782 | -1.47 | 0.192 |
| 1431981_at   | hypoxia inducible factor 1, alpha subunit                                                   | Hif1a         | 2.43 | 0.003 | 1.72  | 0.555 | 1.42  | 0.470 | 2.62  | 0.154 | 2.15  | 0.093 |
| 1457756_at   | zinc finger protein 192                                                                     | Zfp192        | 2.42 | 0.016 | 2.06  | 0.007 | 1.04  | 0.697 | 1.27  | 0.765 | 1.01  | 0.933 |
| 1435467_at   | FYVE, RhoGEF and PH domain containing 6                                                     | Fgd6          | 2.42 | 0.026 | 2.92  | 0.420 | 1.13  | 0.646 | 1.21  | 0.869 | 1.48  | 0.307 |
| 1427155_at   | FCH and double SH3 domains 1                                                                | Fchsd1        | 2.42 | 0.025 | 2.81  | 0.218 | 2.49  | 0.585 | 1.03  | 0.924 | 2.91  | 0.325 |
| 1421120_at   | myosin VI                                                                                   | Myo6          | 2.41 | 0.043 | 1.2   | 0.755 | -1.51 | 0.192 | 2.37  | 0.118 | 1.71  | 0.999 |
| 1450829_at   | tumor necrosis factor, alpha-induced protein 3                                              | Tnfaip3       | 2.4  | 0.043 | 3.44  | 0.102 | 1.32  | 0.571 | 1.34  | 0.196 | 1.4   | 0.411 |
| 1447418_at   | Potassium voltage-gated channel, subfamily Q, member 1                                      | Kcnq3         | 2.4  | 0.005 | 1.26  | 0.376 | 1.74  | 0.101 | 1.5   | 0.329 | 1.25  | 0.391 |
| 1431871_at   | thioredoxin domain containing 3 (spermatozoa)                                               | Txndc3        | 2.39 | 0.040 | 1.8   | 0.249 | -1.22 | 0.281 | 1.33  | 0.222 | 2.89  | 0.154 |
| 1425751_at   | cDNA sequence BC014805                                                                      | BC014805      | 2.39 | 0.045 | 1.82  | 0.223 | 1.14  | 0.956 | 1.11  | 0.497 | -1.27 | 0.305 |
| 1425805_a_at | ubiquitin specific peptidase 12                                                             | Usp12         | 2.38 | 0.013 | 2.89  | 0.225 | 1.35  | 0.855 | 1.07  | 0.867 | 1.03  | 0.931 |
| 1428838_a_at | deoxycytidine kinase                                                                        | Dck           | 2.38 | 0.032 | 2.79  | 0.006 | 1.43  | 0.032 | 1.29  | 0.301 | 1.24  | 0.325 |
| 1419985_s_at | coiled-coil domain containing 69                                                            | Ccdc69        | 2.38 | 0.049 | 2.08  | 0.860 | 1.19  | 0.527 | 1.58  | 0.540 | 3.18  | 0.174 |
| 1433004_at   | RIKEN cDNA 4833446E11 gene                                                                  | 4833446E11Rik | 2.38 | 0.026 | 1.08  | 0.584 | 1.03  | 0.779 | -1.06 | 0.844 | -1.16 | 0.499 |
| 1423064_at   | DNA methyltransferase 3A                                                                    | Dnmt3a        | 2.36 | 0.025 | 1.33  | 0.764 | -1.63 | 0.080 | -1.51 | 0.090 | 2.06  | 0.152 |
| 1454111_at   | RIKEN cDNA 4930404A10 gene                                                                  | 4930404A10Rik | 2.36 | 0.002 | 3.09  | 0.332 | -1.2  | 0.250 | 1.31  | 0.318 | 2.72  | 0.443 |
| 1425604_at   | v-crk sarcoma virus CT10 oncogene homolog (avian)-like                                      | Crkl          | 2.35 | 0.015 | 3.05  | 0.282 | 1.01  | 0.985 | 1.3   | 0.274 | -1.16 | 0.391 |

|              |                                                                                              |               |      |       |       |       |       |       |       |       |       |       |
|--------------|----------------------------------------------------------------------------------------------|---------------|------|-------|-------|-------|-------|-------|-------|-------|-------|-------|
| 1444772_at   | SET and MYND domain containing 3                                                             | Smyd3         | 2.34 | 0.032 | -1.23 | 0.124 | -1.1  | 0.699 | -1.37 | 0.100 | -1.02 | 0.229 |
| 1442549_at   | muscleblind-like 3 (Drosophila)                                                              | Mbnl3         | 2.34 | 0.015 | 2.16  | 0.173 | -1.17 | 0.810 | -1.05 | 0.718 | 1.8   | 0.044 |
| 1419016_at   | RIKEN cDNA 1700034I23 gene                                                                   | 1700034I23Rik | 2.33 | 0.044 | 1.47  | 0.672 | 2.91  | 0.010 | 1.68  | 0.404 | 1.73  | 0.132 |
| 1456983_at   | Trichorhinophalangeal syndrome I (human)                                                     | Trps1         | 2.32 | 0.036 | 2.84  | 0.105 | -1.08 | 0.244 | 1.16  | 0.304 | -2.15 | 0.057 |
| 1421435_at   | glutamate receptor, ionotropic, delta 2                                                      | Grid2         | 2.32 | 0.004 | 3.03  | 0.001 | 1.61  | 0.698 | -1.11 | 0.636 | -1.34 | 0.315 |
| 1448823_at   | chemokine (C-X-C motif) ligand 12                                                            | Cxcl12        | 2.32 | 0.020 | 1.81  | 0.034 | -1.26 | 0.094 | -1.1  | 0.083 | 1.05  | 0.611 |
| 1433072_at   | RIKEN cDNA 4933425E08 gene                                                                   | 4933425E08Rik | 2.31 | 0.024 | 1.67  | 0.369 | 4.75  | 0.340 | 2.61  | 0.149 | 1.7   | 0.448 |
| 1460442_at   | ribosomal protein S19                                                                        | Rps19         | 2.3  | 0.015 | 1.16  | 0.824 | 1.73  | 0.826 | -1.43 | 0.163 | 3.08  | 0.464 |
| 1440645_at   | similar to deleted in malignant brain tumors 1 isoform c precursor                           | LOC546006     | 2.29 | 0.046 | 4.08  | 0.018 | 2.49  | 0.340 | -1.05 | 0.328 | -2.48 | 0.015 |
| 1441472_at   | CDC-like kinase 3                                                                            | Clk3          | 2.29 | 0.037 | 2.03  | 0.348 | -1.04 | 0.591 | 1.48  | 0.882 | 1.29  | 0.503 |
| 1421242_at   | ring finger protein 144                                                                      | Rnf144        | 2.28 | 0.005 | 1.97  | 0.910 | 1.27  | 0.234 | 1.08  | 0.842 | 1.58  | 0.314 |
| 1444700_at   | Neurexin III                                                                                 | Nrxn3         | 2.28 | 0.039 | 4.69  | 0.005 | 2.17  | 0.944 | 2.37  | 0.304 | -1.01 | 0.438 |
| 1442019_at   | RIKEN cDNA B230343A10 gene                                                                   | B230343A10Rik | 2.28 | 0.025 | 1.28  | 0.290 | -2.66 | 0.046 | -1.1  | 0.739 | -1.96 | 0.038 |
| 1442388_at   | RIKEN cDNA 2410137F16 gene                                                                   | 2410137F16Rik | 2.28 | 0.019 | 1.3   | 0.088 | 1.58  | 0.647 | 1.63  | 0.613 | -1.74 | 0.086 |
| 1455531_at   | RIKEN cDNA A930031D07 gene                                                                   | A930031D07Rik | 2.27 | 0.047 | 1.77  | 0.243 | -1.13 | 0.539 | 1.69  | 0.082 | 1.23  | 0.536 |
| 1421325_at   | phospholipase A2, group IIF                                                                  | Pla2g2f       | 2.26 | 0.033 | 1.1   | 0.862 | -1.27 | 0.211 | -1.28 | 0.259 | 1.49  | 0.315 |
| 1459186_at   | expressed sequence C80165                                                                    | C80165        | 2.26 | 0.005 | 1.98  | 0.196 | 1.44  | 0.965 | -1.36 | 0.300 | 1.89  | 0.750 |
| 1456206_at   | AlkB, alkylation repair homolog 3 (E. coli)                                                  | Alkbh3        | 2.26 | 0.031 | -1.07 | 0.682 | -1.23 | 0.452 | -1.03 | 0.394 | -1.35 | 0.225 |
| 1430659_at   | RIKEN cDNA 4930548H24 gene                                                                   | 4930548H24Rik | 2.26 | 0.026 | 2.55  | 0.135 | 1.23  | 0.536 | 1.29  | 0.746 | 1.78  | 0.203 |
| 1460292_a_at | SWI/SNF related, matrix associated, actin dependent regulator of chror Smarca1               |               | 2.25 | 0.036 | 2.23  | 0.386 | 2.08  | 0.708 | 1.33  | 0.934 | -1.35 | 0.257 |
| 1441365_at   | forkhead box P2                                                                              | Foxp2         | 2.24 | 0.034 | 1.94  | 0.330 | 1.15  | 0.826 | -1.56 | 0.132 | -1.17 | 0.104 |
| 1437559_at   | DNA segment, Chr 13, Brigham & Women's Genetics 1146 expressed                               | D13Bwg1146e   | 2.24 | 0.001 | 1.64  | 0.401 | 1.08  | 0.666 | -1.35 | 0.320 | 1.61  | 0.839 |
| 1451914_a_at | adducin 2 (beta)                                                                             | Add2          | 2.24 | 0.032 | 1.48  | 0.507 | 1.14  | 0.537 | 1.25  | 0.615 | 1.45  | 0.904 |
| 1447979_at   | RUN and TBC1 domain containing 2                                                             | Rutbc2        | 2.23 | 0.040 | 1.45  | 0.901 | -1.25 | 0.416 | 3.29  | 0.185 | 1.57  | 0.183 |
| 1443824_s_at | carbonic anhydrase 7                                                                         | Car7          | 2.23 | 0.031 | 2.82  | 0.365 | 3.43  | 0.985 | -1.15 | 0.183 | 1.1   | 0.998 |
| 1458553_at   | plasminogen activator, tissue                                                                | Plat          | 2.22 | 0.034 | -1.04 | 0.549 | -1.25 | 0.362 | -1.14 | 0.444 | -1.04 | 0.751 |
| 1435465_at   | kelch repeat and BTB (POZ) domain containing 11 /// similar to Protein Kbtbd11 /// LOC632344 |               | 2.22 | 0.009 | 1.69  | 0.823 | 1.29  | 0.388 | 1.37  | 0.339 | 2.21  | 0.328 |
| 1456993_at   | DNA segment, Chr 2, ERATO Doi 640, expressed                                                 | D2Ert640e     | 2.22 | 0.047 | 1.38  | 0.263 | -1.14 | 0.288 | 1.52  | 0.985 | -1.05 | 0.656 |
| 1421925_at   | mitogen-activated protein kinase 11                                                          | Mapk11        | 2.21 | 0.008 | 2.92  | 0.527 | -1.05 | 0.550 | -1.07 | 0.577 | 1.37  | 0.363 |
| 1457919_at   | RIKEN cDNA D030054H15 gene                                                                   | D030054H15Rik | 2.21 | 0.035 | 2.15  | 0.154 | -1.22 | 0.217 | 1.46  | 0.660 | -1.43 | 0.250 |
| 1441141_at   | RIKEN cDNA C730024G19 gene                                                                   | C730024G19Rik | 2.21 | 0.033 | 1.53  | 0.822 | 1.12  | 0.874 | 1.18  | 0.903 | 1.9   | 0.428 |
| 1425778_at   | RIKEN cDNA C230043N17 gene                                                                   | C230043N17Rik | 2.21 | 0.003 | 2.22  | 0.058 | -1.43 | 0.149 | 1.02  | 0.690 | -1.06 | 0.861 |
| 1432941_at   | RIKEN cDNA 5730408A14 gene                                                                   | 5730408A14Rik | 2.21 | 0.025 | -1.23 | 0.251 | -1.14 | 0.315 | 1.27  | 0.561 | -1.91 | 0.087 |
| 1429268_at   | RIKEN cDNA 2610318N02 gene                                                                   | 2610318N02Rik | 2.21 | 0.003 | 1.71  | 0.022 | -1.18 | 0.469 | 1.97  | 0.024 | 1.27  | 0.089 |
| 1459011_at   | Ubiquitin carboxyl-terminal esterase L5                                                      | Uchl5         | 2.2  | 0.032 | 1.84  | 0.894 | 1.04  | 0.760 | 1.16  | 0.338 | -1.07 | 0.822 |
| 1437978_at   | Slit homolog 2 (Drosophila)                                                                  | Slit2         | 2.2  | 0.024 | 2.27  | 0.342 | -1.11 | 0.416 | 1.16  | 0.639 | 2.81  | 0.321 |
| 1442125_at   | KRIT1, ankyrin repeat containing                                                             | Krit1         | 2.2  | 0.047 | 2.25  | 0.149 | 1.17  | 0.638 | 1.21  | 0.609 | -1.25 | 0.177 |
| 1441271_at   | Isocitrate dehydrogenase 3 (NAD+) beta                                                       | Idh3b         | 2.2  | 0.014 | 1.33  | 0.459 | 1.21  | 0.862 | 1.63  | 0.038 | 1.51  | 0.143 |
| 1427461_at   | cDNA sequence BC005561                                                                       | BC005561      | 2.2  | 0.018 | 2.82  | 0.269 | -1.14 | 0.631 | -1.25 | 0.341 | -1.55 | 0.027 |
| 1447713_at   | tropomyosin 1, alpha                                                                         | Tpm1          | 2.19 | 0.028 | 2.97  | 0.312 | 1.1   | 0.849 | 1.28  | 0.022 | 1.75  | 0.215 |
| 1449432_a_at | membrane metallo-endopeptidase-like 1                                                        | Mmel1         | 2.19 | 0.027 | 2.24  | 0.148 | 1.21  | 0.405 | -1.15 | 0.290 | 1.99  | 0.088 |

|              |                                                                                                 |                        |      |       |       |       |       |       |       |       |       |       |
|--------------|-------------------------------------------------------------------------------------------------|------------------------|------|-------|-------|-------|-------|-------|-------|-------|-------|-------|
| 1436560_at   | expressed sequence AW124694                                                                     | AW124694               | 2.19 | 0.008 | 1.89  | 0.017 | 1.18  | 0.119 | 1.33  | 0.263 | 1.33  | 0.066 |
| 1444913_at   | Hedgehog acyltransferase                                                                        | Hhat                   | 2.18 | 0.041 | 3     | 0.160 | 1.15  | 0.716 | 3.26  | 0.107 | 1.34  | 0.530 |
| 1432947_at   | RIKEN cDNA 4921519G19 gene                                                                      | 4921519G19Rik          | 2.17 | 0.044 | 1.51  | 0.384 | 1.49  | 0.424 | 1.48  | 0.129 | 1.34  | 0.809 |
| 1452408_at   | G protein-coupled receptor 31, D17Leh66c region                                                 | Gpr31c                 | 2.16 | 0.028 | 1.07  | 0.867 | 2.01  | 0.826 | 2.62  | 0.185 | 2.69  | 0.270 |
| 1444873_at   | Huntingtin interacting protein 1                                                                | Hip1                   | 2.15 | 0.027 | 1.55  | 0.175 | 1.09  | 0.912 | 1.08  | 0.816 | 1.83  | 0.624 |
| 1422287_at   | per-hexamer repeat gene 2                                                                       | Phxr2                  | 2.14 | 0.010 | 1.74  | 0.227 | 1.17  | 0.726 | 1.19  | 0.691 | 3.44  | 0.396 |
| 1449234_at   | carbonic anhydrase 15                                                                           | Car15                  | 2.14 | 0.050 | 2.15  | 0.328 | -1.57 | 0.155 | 1.2   | 0.604 | 2.21  | 0.828 |
| 1457051_at   | tripartite motif protein 27                                                                     | Trim27                 | 2.13 | 0.047 | 1.8   | 0.555 | 1.44  | 0.007 | 1.18  | 0.859 | 2.22  | 0.010 |
| 1440829_x_at | tubulin tyrosine ligase-like family, member 11                                                  | Ttl11                  | 2.11 | 0.045 | -1.05 | 0.488 | -2.11 | 0.097 | 1.63  | 0.872 | -1.01 | 0.560 |
| 1424952_at   | OCIA domain containing 1                                                                        | Ociad1                 | 2.11 | 0.042 | 1.99  | 0.009 | 3.14  | 0.190 | -1.13 | 0.404 | 1.66  | 0.444 |
| 1439795_at   | G protein-coupled receptor 64                                                                   | Gpr64                  | 2.1  | 0.023 | -1.21 | 0.409 | 1.47  | 0.950 | 1     | 0.808 | 1.26  | 0.238 |
| 1425167_a_at | guanine nucleotide binding protein (G protein), gamma transducing act                           | Gngt1                  | 2.1  | 0.004 | 1.87  | 0.132 | -1.11 | 0.313 | 2.11  | 0.426 | 1.57  | 0.050 |
| 1458325_x_at | Bcl2 modifying factor                                                                           | Bmf                    | 2.1  | 0.027 | 1.58  | 0.551 | -1.22 | 0.225 | 1.39  | 0.378 | -1.43 | 0.267 |
| 1431326_a_at | tropomodulin 2                                                                                  | Tmod2                  | 2.09 | 0.004 | 1.1   | 0.575 | 1.63  | 0.614 | 3.93  | 0.066 | -1.06 | 0.576 |
| 1458432_at   | Non-catalytic region of tyrosine kinase adaptor protein 2                                       | Nck2                   | 2.09 | 0.038 | 3.01  | 0.090 | 2.05  | 0.082 | 1.31  | 0.378 | 1.26  | 0.640 |
| 1444284_at   | RIKEN cDNA A130050O07 gene                                                                      | A130050O07Rik          | 2.09 | 0.012 | -1.04 | 0.399 | 1.44  | 0.664 | -1.2  | 0.356 | 1.08  | 0.400 |
| 1443554_at   | Single-stranded DNA binding protein 3                                                           | Ssbp3                  | 2.08 | 0.034 | 1.37  | 0.443 | -1.03 | 0.519 | 1.33  | 0.916 | 1.49  | 0.376 |
| 1460135_at   | RIKEN cDNA A930005H10 gene                                                                      | A930005H10Rik          | 2.08 | 0.010 | 1.06  | 0.823 | -1.32 | 0.127 | 1.49  | 0.757 | -1    | 0.348 |
| 1445230_at   | Nuclear receptor co-repressor 1                                                                 | Ncor1                  | 2.07 | 0.049 | -1.12 | 0.532 | 1.1   | 0.977 | -1.49 | 0.017 | -1.43 | 0.055 |
| 1432408_a_at | DNA segment, KIST 2                                                                             | DKist2                 | 2.07 | 0.015 | 1.49  | 0.661 | 1.2   | 0.564 | -1.06 | 0.370 | 2.07  | 0.904 |
| 1438079_at   | cDNA sequence BC050078                                                                          | BC050078               | 2.07 | 0.006 | 1.61  | 0.434 | 1.36  | 0.478 | 2.12  | 0.200 | 1.68  | 0.321 |
| 1438620_x_at | secreted frizzled-related sequence protein 1                                                    | Sfrp1                  | 2.06 | 0.023 | 1.53  | 0.932 | 2.23  | 0.055 | -1.05 | 0.383 | 1.72  | 0.629 |
| 1439340_at   | RIKEN cDNA D630036G22 gene                                                                      | D630036G22Rik          | 2.05 | 0.002 | 2.51  | 0.456 | -2.96 | 0.050 | -1.13 | 0.280 | 1.56  | 0.338 |
| 1423366_at   | stearoyl-coenzyme A desaturase 3                                                                | Scd3                   | 2.04 | 0.050 | 2.85  | 0.258 | -1.09 | 0.148 | 2.57  | 0.221 | 1.16  | 0.763 |
| 1427427_at   | ryanodine receptor 3                                                                            | Ryr3                   | 2.04 | 0.039 | 2.53  | 0.139 | 1.14  | 0.476 | 1.02  | 0.442 | 1.24  | 0.704 |
| 1423578_at   | procollagen, type XI, alpha 2                                                                   | Col11a2                | 2.04 | 0.018 | 1.81  | 0.043 | -2.01 | 0.119 | 1.06  | 0.949 | 2.92  | 0.763 |
| 1437949_x_at | zinc finger protein 313                                                                         | Zfp313                 | 2.02 | 0.039 | 1.93  | 0.009 | 1.52  | 0.738 | 1.21  | 0.340 | -1.09 | 0.341 |
| 1436648_at   | nanos homolog 1 (Drosophila)                                                                    | Nanos1                 | 2.01 | 0.042 | 2.82  | 0.165 | 2.48  | 0.098 | 1.46  | 0.042 | 1.84  | 0.044 |
| 1421220_at   | ankyrin repeat domain 17                                                                        | Ankrd17                | 2.01 | 0.015 | 3.7   | 0.047 | 1.31  | 0.156 | -1.17 | 0.308 | -1.13 | 0.602 |
| 1422878_at   | synaptotagmin XII                                                                               | Syt12                  | 2    | 0.043 | 1.56  | 0.389 | -1.06 | 0.881 | 1.21  | 0.209 | -1.18 | 0.460 |
| 1455302_at   | vacuolar protein sorting 29 (S. pombe)                                                          | Vps29                  | 1.99 | 0.014 | 2.46  | 0.140 | 1     | 0.863 | -1.21 | 0.398 | 1.83  | 0.386 |
| 1419236_at   | helicase (DNA) B                                                                                | Helb                   | 1.99 | 0.028 | 2.18  | 0.060 | 1.56  | 0.792 | 2.56  | 0.102 | -1.15 | 0.391 |
| 1435765_at   | RIKEN cDNA E130114P18 gene                                                                      | E130114P18Rik          | 1.97 | 0.044 | -1    | 0.903 | 1.95  | 0.418 | 3     | 0.310 | 1.16  | 0.593 |
| 1458427_at   | BRCA1 interacting protein C-terminal helicase 1                                                 | Brip1                  | 1.97 | 0.012 | 1.7   | 0.226 | 1.2   | 0.423 | 1.44  | 0.542 | 1.32  | 0.896 |
| 1458479_at   | SMC2 structural maintenance of chromosomes 2-like 1 (yeast)                                     | Smc21                  | 1.96 | 0.037 | -1.32 | 0.447 | 1.22  | 0.864 | 1.66  | 0.199 | 1.08  | 0.604 |
| 1425509_at   | MAP/microtubule affinity-regulating kinase 1                                                    | Mark1                  | 1.96 | 0.023 | 1.41  | 0.387 | -1.08 | 0.543 | -1.02 | 0.502 | -1.09 | 0.253 |
| 1422105_at   | CD3 antigen, epsilon polypeptide                                                                | Cd3e                   | 1.96 | 0.048 | 1.52  | 0.331 | -1.14 | 0.253 | -1.18 | 0.335 | 1.35  | 0.310 |
| 1419187_at   | RIKEN cDNA 1700012L04 gene /// similar to Histone H2A.x (H2a/x)                                 | 1700012L04Rik /// LOC5 | 1.96 | 0.005 | 1.23  | 0.679 | -1.02 | 0.777 | -1.28 | 0.158 | 1.66  | 0.735 |
| 1454903_at   | nerve growth factor receptor (TNFR superfamily, member 16)                                      | Ngfr                   | 1.95 | 0.002 | 2.21  | 0.070 | 1.16  | 0.981 | 1.03  | 0.352 | 2.46  | 0.142 |
| 1426202_at   | Histocompatibility 2, class II antigen E alpha /// MHC class II E-sub- $\alpha$ 1 H2-E $\alpha$ |                        | 1.95 | 0.017 | 1.53  | 0.063 | -1.81 | 0.079 | 4.07  | 0.142 | 1.48  | 0.649 |
| 1458879_at   | expressed sequence C76798                                                                       | C76798                 | 1.95 | 0.004 | 1.95  | 0.334 | 1.09  | 0.739 | 1.49  | 0.482 | 2.17  | 0.151 |

|              |                                                                                                  |                        |      |       |       |       |       |       |       |       |       |       |
|--------------|--------------------------------------------------------------------------------------------------|------------------------|------|-------|-------|-------|-------|-------|-------|-------|-------|-------|
| 1426093_at   | tripartite motif protein 34                                                                      | Trim34                 | 1.94 | 0.019 | 2.65  | 0.443 | 1.73  | 0.310 | 1.36  | 0.542 | 2.45  | 0.585 |
| 1441122_at   | expressed sequence AU024342                                                                      | AU024342               | 1.94 | 0.031 | 3.04  | 0.037 | 2.2   | 0.289 | 1.85  | 0.133 | -1.01 | 0.486 |
| 1432390_at   | RIKEN cDNA 4933400F21 gene                                                                       | 4933400F21Rik          | 1.94 | 0.024 | 1.83  | 0.218 | 2.22  | 0.972 | -1.07 | 0.360 | 1.09  | 0.782 |
| 1432046_at   | RIKEN cDNA 4930404K06 gene                                                                       | 4930404K06Rik          | 1.94 | 0.040 | 1.44  | 0.385 | -1.23 | 0.370 | 1.32  | 0.494 | 2.72  | 0.200 |
| 1458729_at   | FK506 binding protein 4                                                                          | Fkbp4                  | 1.93 | 0.006 | 1.78  | 0.024 | 1.43  | 0.532 | 1.13  | 0.236 | 1.83  | 0.320 |
| 1434752_at   | zinc finger protein 207                                                                          | Zfp207                 | 1.91 | 0.016 | 1.74  | 0.005 | 1.45  | 0.244 | 1.23  | 0.481 | -1.09 | 0.269 |
| 1449969_at   | tropomodulin 4                                                                                   | Tmod4                  | 1.91 | 0.036 | 1.68  | 0.663 | 1.98  | 0.320 | 1.31  | 0.407 | -1.49 | 0.243 |
| 1445788_at   | Insulin-like growth factor 2, binding protein 1                                                  | Igf2bp1                | 1.91 | 0.035 | 1.22  | 0.862 | 2.01  | 0.545 | -1.37 | 0.064 | 1.86  | 0.679 |
| 1433577_at   | RIKEN cDNA A730017C20 gene                                                                       | A730017C20Rik          | 1.91 | 0.002 | 1.64  | 0.018 | 1.83  | 0.096 | 1.19  | 0.786 | 1.12  | 0.773 |
| 1454533_at   | RIKEN cDNA 9430085L16 gene                                                                       | 9430085L16Rik          | 1.91 | 0.047 | 2.65  | 0.161 | 2.92  | 0.216 | -1.45 | 0.187 | 1.79  | 0.385 |
| 1452530_a_at | runt related transcription factor 1                                                              | Runx1                  | 1.9  | 0.033 | 2.22  | 0.199 | -1.29 | 0.208 | 1.27  | 0.238 | 1.02  | 0.875 |
| 1438414_at   | fukutin related protein                                                                          | Fkrp                   | 1.9  | 0.015 | 1.34  | 0.876 | -1.11 | 0.332 | 2.57  | 0.078 | -1.16 | 0.459 |
| 1425450_at   | chitinase 3-like 4                                                                               | Chi3l4                 | 1.89 | 0.019 | 1.01  | 0.873 | -1.63 | 0.104 | -1.19 | 0.336 | 2.3   | 0.198 |
| 1454420_at   | RIKEN cDNA 5730420F10 gene                                                                       | 5730420F10Rik          | 1.89 | 0.048 | 1.63  | 0.973 | 2.92  | 0.154 | -1.01 | 0.387 | 1.08  | 0.829 |
| 1429666_at   | potassium channel tetramerisation domain containing 16                                           | Kctd16                 | 1.88 | 0.009 | 1.39  | 0.309 | 1.33  | 0.201 | 2.47  | 0.159 | 2.02  | 0.039 |
| 1454229_a_at | exonuclease domain containing 1                                                                  | Exod1                  | 1.88 | 0.010 | 2.25  | 0.095 | 1.06  | 0.906 | 1.39  | 0.030 | -1.06 | 0.818 |
| 1442661_at   | expressed sequence C80113                                                                        | C80113                 | 1.88 | 0.045 | 1.61  | 0.393 | 1.19  | 0.771 | 1.23  | 0.763 | 1.29  | 0.460 |
| 1445758_at   | CDNA sequence BC049816                                                                           | BC049816               | 1.88 | 0.009 | 1.8   | 0.021 | -1.03 | 0.688 | 1.12  | 0.933 | 1.04  | 0.769 |
| 1435351_at   | RIKEN cDNA 2310026E23 gene                                                                       | 2310026E23Rik          | 1.88 | 0.005 | -1.46 | 0.084 | -1.52 | 0.066 | 1.67  | 0.405 | 1.16  | 0.554 |
| 1438911_at   | Septin 7                                                                                         |                        | 1.88 | 0.044 | 1.19  | 0.402 | -1.35 | 0.211 | -1.12 | 0.461 | -1.03 | 0.812 |
| 1419886_at   | DNA segment, Chr X, ERATO Doi 223, expressed                                                     | DXErtd223e             | 1.87 | 0.038 | 2.5   | 0.193 | 1.06  | 0.973 | -1.07 | 0.745 | -1.19 | 0.210 |
| 1430884_at   | RIKEN cDNA 4930568G15 gene                                                                       | 4930568G15Rik          | 1.86 | 0.041 | 1.77  | 0.096 | 1.13  | 0.537 | 1.2   | 0.739 | -1.52 | 0.194 |
| 1458870_x_at | pam, highwire, rpm 1                                                                             | Phr1                   | 1.85 | 0.004 | -1.35 | 0.299 | -1.12 | 0.254 | -1.03 | 0.828 | -1.4  | 0.352 |
| 1417577_at   | transient receptor potential cation channel, subfamily C, member 3                               | Trpc3                  | 1.84 | 0.029 | 1.12  | 0.452 | -1.16 | 0.501 | -2.19 | 0.050 | -1.14 | 0.444 |
| 1443418_at   | Phosphoribosyl pyrophosphate synthetase 2                                                        | Prps2                  | 1.84 | 0.030 | 2.27  | 0.114 | 1.41  | 0.575 | 1.83  | 0.701 | 1.34  | 0.064 |
| 1446557_at   | RIKEN cDNA E130309F12 gene                                                                       | E130309F12Rik          | 1.84 | 0.007 | 1.6   | 0.937 | -1.28 | 0.300 | -1.2  | 0.235 | 1.59  | 0.560 |
| 1439247_at   | dedicator of cytokinesis 10 /// similar to Dedicator of cytokinesis protein Dock10 /// LOC630691 |                        | 1.84 | 0.029 | 2.47  | 0.564 | 1.19  | 0.775 | 1.19  | 0.862 | -1.09 | 0.605 |
| 1443714_at   | RIKEN cDNA C530044N13 gene                                                                       | C530044N13Rik          | 1.84 | 0.044 | 2.26  | 0.194 | -1.19 | 0.290 | 1.83  | 0.555 | -1.34 | 0.229 |
| 1435109_at   | RIKEN cDNA 0710007G10 gene /// RIKEN cDNA 3010001K23 gene                                        | 0710007G10Rik /// 3010 | 1.84 | 0.040 | 1.72  | 0.193 | 1.09  | 0.423 | -1.23 | 0.153 | 1.04  | 0.959 |
| 1416463_at   | GPI-anchored membrane protein 1                                                                  | Gpiap1                 | 1.83 | 0.047 | 1.98  | 0.135 | -1.19 | 0.255 | -1.21 | 0.081 | -1.13 | 0.285 |
| 1456480_at   | furry homolog (Drosophila)                                                                       | Fry                    | 1.83 | 0.036 | 2.06  | 0.336 | 1.26  | 0.475 | -1.05 | 0.418 | -1.04 | 0.476 |
| 1429937_at   | RIKEN cDNA D530033C11 gene                                                                       | D530033C11Rik          | 1.83 | 0.046 | 2.41  | 0.011 | 1.24  | 0.081 | 1.03  | 0.874 | 1.11  | 0.302 |
| 1443356_at   | Cyclic AMP-regulated phosphoprotein, 21                                                          | Arpp21                 | 1.83 | 0.029 | 1.42  | 0.583 | 1.31  | 0.886 | 1.06  | 0.976 | 1.71  | 0.125 |
| 1450936_a_at | deoxyribonuclease 1-like 2                                                                       | Dnase1l2               | 1.82 | 0.044 | 3.41  | 0.149 | 1.34  | 0.700 | -1.46 | 0.189 | 1.52  | 0.791 |
| 1441117_at   | Ash1 (absent, small, or homeotic)-like (Drosophila)                                              | Ash1l                  | 1.82 | 0.019 | 1.32  | 0.554 | -1.03 | 0.688 | 1.02  | 0.803 | -1.97 | 0.120 |
| 1444472_at   | SNF1-like kinase 2                                                                               | Snf1l2                 | 1.81 | 0.028 | 2.28  | 0.093 | -1.05 | 0.559 | 1.01  | 0.828 | 1.42  | 0.103 |
| 1432608_at   | nicotinamide nucleotide transhydrogenase                                                         | Nnt                    | 1.81 | 0.049 | 2.09  | 0.652 | -1.11 | 0.278 | 1.24  | 0.193 | 1.31  | 0.797 |
| 1457398_at   | Guanosine diphosphate (GDP) dissociation inhibitor 2                                             | Gdi2                   | 1.81 | 0.047 | 1.74  | 0.206 | 1.11  | 0.236 | 1.18  | 0.322 | -1.15 | 0.179 |
| 1459567_at   | expressed sequence C77905                                                                        | C77905                 | 1.81 | 0.021 | 1.15  | 0.967 | -1.22 | 0.260 | -1.28 | 0.251 | 2.67  | 0.225 |
| 1436361_at   | vestigial like 2 homolog (Drosophila)                                                            | Vgll2                  | 1.8  | 0.044 | 1.77  | 0.932 | 1.72  | 0.253 | 3.03  | 0.069 | 2.47  | 0.024 |
| 1458502_at   | Kinectin 1                                                                                       | Ktn1                   | 1.8  | 0.032 | 1.74  | 0.551 | 2.04  | 0.454 | 2.85  | 0.092 | -1.56 | 0.178 |

|              |                                                                                                   |               |       |       |       |       |       |       |       |       |       |       |
|--------------|---------------------------------------------------------------------------------------------------|---------------|-------|-------|-------|-------|-------|-------|-------|-------|-------|-------|
| 1429600_at   | RIKEN cDNA C630010D07 gene /// similar to methylenetetrahydrofolat C630010D07Rik /// LOC          | 1.8           | 0.037 | 1.4   | 0.578 | -1.34 | 0.001 | -1.12 | 0.351 | -1.17 | 0.188 |       |
| 1456643_at   | RIKEN cDNA 9230114K14 gene                                                                        | 9230114K14Rik | 1.79  | 0.015 | 3.25  | 0.006 | 1.22  | 0.409 | 1.12  | 0.323 | 1.34  | 0.003 |
| 1454572_at   | RIKEN cDNA 2810414N06 gene                                                                        | 2810414N06Rik | 1.79  | 0.035 | 1.31  | 0.305 | -1.64 | 0.164 | 1.29  | 0.601 | 1.13  | 0.986 |
| 1445922_at   | X-ray repair complementing defective repair in Chinese hamster cells 4 Xrcc4                      |               | 1.78  | 0.033 | -1.1  | 0.465 | -1.12 | 0.349 | 2.95  | 0.204 | 1.06  | 0.496 |
| 1421196_at   | protein tyrosine phosphatase, non-receptor type 11                                                | Ptpn11        | 1.78  | 0.002 | 1.75  | 0.006 | -1.03 | 0.751 | 1.09  | 0.547 | 1.05  | 0.614 |
| 1419895_at   | expressed sequence AA536748                                                                       | AA536748      | 1.78  | 0.007 | 2.6   | 0.067 | -1.77 | 0.066 | 3.26  | 0.280 | -1.08 | 0.899 |
| 1416552_at   | developmental pluripotency associated 5                                                           | Dppa5         | 1.77  | 0.026 | 1.53  | 0.180 | 1.03  | 0.785 | 1.17  | 0.396 | 1.49  | 0.368 |
| 1416062_at   | TBC1 domain family, member 15                                                                     | Tbc1d15       | 1.76  | 0.037 | 1.47  | 0.447 | -1.06 | 0.536 | 1.09  | 0.157 | -1.06 | 0.599 |
| 1434878_at   | SLIT and NTRK-like family, member 4                                                               | Slitrk4       | 1.76  | 0.036 | -1.88 | 0.025 | 2.16  | 0.897 | 1.87  | 0.331 | -2.58 | 0.033 |
| 1424414_at   | opioid growth factor receptor-like 1 /// similar to opioid growth factor rec Ogfrl1 /// LOC673882 |               | 1.76  | 0.042 | 2.03  | 0.277 | 2.01  | 0.398 | 2.47  | 0.110 | 1.21  | 0.767 |
| 1423886_at   | laminin, gamma 1                                                                                  | Lamc1         | 1.75  | 0.005 | 1.21  | 0.595 | -1.37 | 0.235 | 1.09  | 0.701 | 1.44  | 0.972 |
| 1422986_at   | estrogen related receptor, beta                                                                   | Esrrb         | 1.75  | 0.036 | 1.34  | 0.221 | 1.23  | 0.889 | -1.39 | 0.126 | 1.21  | 0.779 |
| 1427973_s_at | Vcell division cycle 73, Paf1/RNA polymerase II complex component, h Cdc73                        |               | 1.75  | 0.011 | 1.46  | 0.127 | -1.3  | 0.097 | -1.31 | 0.023 | -1.2  | 0.210 |
| 1449873_at   | bone morphogenetic protein 8a                                                                     | Bmp8a         | 1.75  | 0.004 | 1.11  | 0.663 | -1.09 | 0.554 | -1.29 | 0.540 | 1.21  | 0.986 |
| 1454521_at   | RIKEN cDNA 2810421E14 gene                                                                        | 2810421E14Rik | 1.75  | 0.019 | 2.06  | 0.105 | -1.06 | 0.548 | 1.84  | 0.181 | -1.51 | 0.340 |
| 1455219_at   | RIKEN cDNA 1110030E23 gene                                                                        | 1110030E23Rik | 1.75  | 0.025 | 1.88  | 0.187 | -1.24 | 0.059 | 1.49  | 0.210 | 1.07  | 0.844 |
| 1425741_at   | SLIT-ROBO Rho GTPase activating protein 3                                                         | Srgap3        | 1.74  | 0.047 | 1.02  | 0.936 | -1.98 | 0.010 | 1.23  | 0.324 | -1.6  | 0.146 |
| 1455416_at   | Riken cDNA C130021I20 gene                                                                        | C130021I20Rik | 1.74  | 0.044 | 1.06  | 0.709 | -2.08 | 0.017 | 1.51  | 0.407 | 1.54  | 0.168 |
| 1422292_at   | RIKEN cDNA A030005K14 gene                                                                        | A030005K14Rik | 1.74  | 0.011 | 5.95  | 0.044 | 1.37  | 0.757 | 1.52  | 0.808 | 1.73  | 0.258 |
| 1453252_at   | dihydrouridine synthase 4-like (S. cerevisiae)                                                    | Dus4l         | 1.73  | 0.033 | 2.08  | 0.005 | 1.44  | 0.627 | 2.72  | 0.013 | 1.27  | 0.260 |
| 1420993_at   | UDP-GlcNAc:betaGal beta-1,3-N-acetylglucosaminyltransferase 5                                     | B3gnt5        | 1.73  | 0.047 | 2.52  | 0.048 | 1.08  | 0.627 | -1.13 | 0.430 | -1.48 | 0.075 |
| 1429793_at   | RIKEN cDNA 1600014K23 gene                                                                        | 1600014K23Rik | 1.73  | 0.003 | 1.08  | 0.787 | 1.45  | 0.491 | 1.05  | 0.221 | 1.41  | 0.592 |
| 1457195_at   | pleckstrin homology domain containing, family M (with RUN domain) m Plekhm1                       |               | 1.72  | 0.017 | -1.06 | 0.342 | 1.93  | 0.976 | 2.57  | 0.404 | 2.34  | 0.620 |
| 1421615_at   | myosin XV                                                                                         | Myo15         | 1.72  | 0.014 | 2.03  | 0.055 | -1.66 | 0.007 | 1.15  | 0.349 | 1.1   | 0.928 |
| 1439332_at   | DNA-damage-inducible transcript 4-like                                                            | Ddit4l        | 1.72  | 0.024 | 3.45  | 0.004 | 2.23  | 0.002 | 1.61  | 0.014 | 2.04  | 0.169 |
| 1427497_at   | RIKEN cDNA 2610015P09 gene                                                                        | 2610015P09Rik | 1.72  | 0.023 | 1.74  | 0.671 | 1.66  | 0.724 | 1.86  | 0.685 | -1.45 | 0.298 |
| 1453477_at   | zinc finger CCCH type containing 6                                                                | Zc3h6         | 1.71  | 0.038 | 1.34  | 0.013 | 1.24  | 0.952 | -1.04 | 0.789 | 2.06  | 0.285 |
| 1460380_at   | desmoglein 2                                                                                      | Dsg2          | 1.71  | 0.033 | 2.23  | 0.046 | 1.48  | 0.510 | -1    | 0.717 | 1.19  | 0.354 |
| 1435600_s_at | cDNA sequence BC020535                                                                            | BC020535      | 1.71  | 0.004 | 1.29  | 0.730 | -1.38 | 0.017 | 1.69  | 0.332 | -1.45 | 0.092 |
| 1430427_a_at | protocadherin 18                                                                                  | Pcdh18        | 1.7   | 0.016 | 2.49  | 0.021 | 2.08  | 0.133 | 1.7   | 0.129 | 1.75  | 0.029 |
| 1427214_at   | agmatine ureohydrolase (agmatinase)                                                               | Agmat         | 1.7   | 0.024 | 2.82  | 0.120 | -1.1  | 0.570 | 1.24  | 0.906 | -1.18 | 0.592 |
| 1456554_at   | RIKEN cDNA 7530414M10 gene                                                                        | 7530414M10Rik | 1.7   | 0.009 | 1.53  | 0.279 | 1.51  | 0.075 | -1.18 | 0.248 | 1.45  | 0.070 |
| 1457915_at   | RIKEN cDNA 4833442J19 gene                                                                        | 4833442J19Rik | 1.7   | 0.004 | 2.68  | 0.074 | 1.56  | 0.117 | 2.49  | 0.559 | 1.31  | 0.340 |
| 1437888_at   | WNK lysine deficient protein kinase 1                                                             | Wnk1          | 1.69  | 0.040 | -1.02 | 0.279 | -1.46 | 0.080 | -1.25 | 0.286 | -1.16 | 0.615 |
| 1459604_at   | SNRPN upstream reading frame                                                                      | Snurf         | 1.69  | 0.023 | -1.3  | 0.256 | 1.34  | 0.140 | 1.89  | 0.821 | 1.02  | 0.981 |
| 1430707_s_at | RIKEN cDNA 1700081D17 gene                                                                        | 1700081D17Rik | 1.69  | 0.048 | -1.01 | 0.759 | 1.03  | 0.915 | -2.66 | 0.002 | 1.88  | 0.264 |
| 1449867_at   | homeo box C9                                                                                      | Hoxc9         | 1.68  | 0.023 | 1.62  | 0.155 | 2.37  | 0.079 | -1.37 | 0.129 | 2.2   | 0.419 |
| 1450677_at   | checkpoint kinase 1 homolog (S. pombe)                                                            | Chek1         | 1.68  | 0.027 | 2.07  | 0.039 | 1.17  | 0.018 | 1.05  | 0.626 | 1.19  | 0.150 |
| 1435605_at   | ARP3 actin-related protein 3 homolog B (yeast)                                                    | Actr3b        | 1.68  | 0.011 | -1.24 | 0.261 | 1     | 0.918 | 1.04  | 0.824 | 1.31  | 0.143 |
| 1438293_at   | trichoplein, keratin filament binding                                                             | Tchp          | 1.67  | 0.049 | 2.77  | 0.036 | 1.33  | 0.199 | 1.28  | 0.292 | 1.27  | 0.300 |
| 1438934_x_at | sema domain, immunoglobulin domain (Ig), transmembrane domain (T Sema4a                           |               | 1.67  | 0.004 | 1.17  | 0.249 | 1.59  | 0.776 | -1.03 | 0.992 | 1.58  | 0.851 |

|              |                                                                             |                     |      |       |       |       |       |       |       |       |       |       |
|--------------|-----------------------------------------------------------------------------|---------------------|------|-------|-------|-------|-------|-------|-------|-------|-------|-------|
| 1421144_at   | retinitis pigmentosa GTPase regulator interacting protein 1                 | Rpgrip1             | 1.67 | 0.038 | 1.72  | 0.036 | -1.02 | 0.571 | 1.17  | 0.016 | 1.03  | 0.995 |
| 1457176_at   | GTPase activating RANGAP domain-like 1                                      | Gaml1               | 1.67 | 0.040 | 1.42  | 0.244 | -1.2  | 0.001 | -1.21 | 0.063 | -1.78 | 0.029 |
| 1441340_at   | centrosomal protein 68                                                      | Cep68               | 1.67 | 0.017 | 3.27  | 0.251 | 1.62  | 0.970 | 1.74  | 0.076 | -1.64 | 0.126 |
| 1429728_at   | RIKEN cDNA 4930429M06Rik                                                    | 4930429M06Rik       | 1.67 | 0.022 | 1.6   | 0.023 | 1.38  | 0.212 | 1.06  | 0.653 | 1.09  | 0.260 |
| 1432756_at   | RIKEN cDNA 2210409O19 gene                                                  | 2210409O19Rik       | 1.67 | 0.001 | 1.48  | 0.398 | -1.05 | 0.463 | 1.9   | 0.133 | 1.69  | 0.298 |
| 1436952_at   | Kruppel-like factor 9                                                       | Klf9                | 1.65 | 0.033 | 1.16  | 0.589 | 1.02  | 0.983 | 1.34  | 0.826 | 1.44  | 0.910 |
| 1423597_at   | ATPase, aminophospholipid transporter (APLT), class I, type 8A, meml Atp8a1 | Atp8a1              | 1.65 | 0.000 | 1.03  | 0.979 | 1.14  | 0.890 | 1.13  | 0.481 | 1.87  | 0.377 |
| 1437397_at   | prolactin receptor                                                          | Prlr                | 1.64 | 0.004 | 1.43  | 0.313 | 1.5   | 0.952 | -1.05 | 0.296 | -1.6  | 0.048 |
| 1444405_at   | RIKEN cDNA E430029J22 gene                                                  | E430029J22Rik       | 1.64 | 0.015 | 1.53  | 0.106 | 1.29  | 0.587 | 1.53  | 0.951 | 1.42  | 0.915 |
| 1419559_at   | cytochrome P450, family 4, subfamily f, polypeptide 14                      | Cyp4f14             | 1.63 | 0.040 | 1.25  | 0.202 | 1.06  | 0.830 | 1.02  | 0.899 | -1.1  | 0.437 |
| 1423352_at   | cysteine-rich secretory protein LCCL domain containing 1                    | Crispld1            | 1.63 | 0.014 | 1.62  | 0.542 | 1.58  | 0.345 | 1.78  | 0.491 | -1.16 | 0.182 |
| 1417940_s_at | RAD51 associated protein 1                                                  | Rad51ap1            | 1.61 | 0.030 | 1.77  | 0.053 | 1.28  | 0.298 | 1.37  | 0.856 | 1.11  | 0.780 |
| 1444525_at   | EGF, latrophilin seven transmembrane domain containing 1                    | Eltf1               | 1.61 | 0.040 | 1.61  | 0.439 | 1.39  | 0.487 | 1.05  | 0.887 | 2.08  | 0.596 |
| 1441084_at   | expressed sequence BE686333                                                 | BE686333            | 1.61 | 0.032 | 2.53  | 0.021 | 2.19  | 0.257 | -1.17 | 0.116 | 1.31  | 0.455 |
| 1441128_at   | Renal tumor antigen                                                         | Rage                | 1.6  | 0.024 | 1.43  | 0.018 | 1.15  | 0.092 | -1.23 | 0.160 | 1.16  | 0.803 |
| 1448355_at   | protease, serine, 16 (thymus)                                               | Prss16              | 1.6  | 0.044 | 1.75  | 0.923 | 1.23  | 0.633 | -1.08 | 0.651 | -1.17 | 0.559 |
| 1423172_at   | N-ethylmaleimide sensitive fusion protein attachment protein beta           | Napb                | 1.6  | 0.042 | 2.83  | 0.043 | 1.02  | 0.872 | 1.16  | 0.184 | -1.07 | 0.886 |
| 1441698_at   | RIKEN cDNA 2410025L10 gene                                                  | 2410025L10Rik       | 1.6  | 0.014 | 1.77  | 0.048 | 1.11  | 0.929 | 1.37  | 0.442 | -1.16 | 0.597 |
| 1459759_s_at | RIKEN cDNA 1700065117 gene                                                  | 1700065117Rik       | 1.6  | 0.022 | 1.25  | 0.750 | -3.43 | 0.015 | -1.16 | 0.387 | -1.84 | 0.157 |
| 1431800_at   | RIKEN cDNA 1300010F03 gene                                                  | 1300010F03Rik       | 1.6  | 0.040 | -1.09 | 0.660 | 2     | 0.050 | 1     | 0.564 | -1.58 | 0.010 |
| 1434737_at   | oligonucleotide/oligosaccharide-binding fold containing 1                   | Obfc1               | 1.59 | 0.023 | 1.85  | 0.060 | 1.2   | 0.371 | 1.42  | 0.013 | 1.3   | 0.073 |
| 1417256_at   | matrix metalloproteinase 13                                                 | Mmp13               | 1.59 | 0.049 | -1.2  | 0.595 | 1.01  | 0.551 | -1.02 | 0.641 | 1.33  | 0.381 |
| 1444055_at   | Heparan sulfate (glucosamine) 3-O-sulfotransferase 3B1                      | Hs3st3b1            | 1.59 | 0.025 | 2.01  | 0.732 | 2.54  | 0.507 | -1.15 | 0.250 | 2.17  | 0.614 |
| 1444992_at   | expressed sequence AI120166                                                 | AI120166            | 1.59 | 0.042 | 1.41  | 0.017 | 1.06  | 0.212 | -1.06 | 0.591 | -1.33 | 0.074 |
| 1454799_at   | RIKEN cDNA A230097K15 gene                                                  | A230097K15Rik       | 1.59 | 0.003 | 1.33  | 0.165 | 1.39  | 0.016 | -1.03 | 0.656 | 1.14  | 0.445 |
| 1439876_at   | vesicle transport through interaction with t-SNAREs homolog 1A (yeast Vti1a | Vti1a               | 1.58 | 0.018 | 2.79  | 0.054 | 1.13  | 0.954 | 1.02  | 0.846 | 1.07  | 0.812 |
| 1460601_at   | myosin VIIA and Rab interacting protein                                     | Myrip               | 1.58 | 0.031 | 1.45  | 0.975 | -1.09 | 0.423 | -1.24 | 0.349 | 1.22  | 0.978 |
| 1429698_at   | mitochondrial transcription termination factor                              | Mterf               | 1.58 | 0.031 | 1.51  | 0.162 | 1     | 0.960 | 1.16  | 0.465 | 1.2   | 0.437 |
| 1439039_at   | transmembrane protein 104                                                   | Tmem104             | 1.57 | 0.030 | 1.38  | 0.066 | 1.46  | 0.547 | 1.33  | 0.269 | 1.35  | 0.592 |
| 1443378_s_at | MAP kinase-activated protein kinase 5 /// a disintegrin and metallopept     | Mapkapk5 /// Adam1a | 1.57 | 0.019 | 1.12  | 0.259 | 1.29  | 0.054 | -1.03 | 0.753 | 1.2   | 0.773 |
| 1425347_a_at | zinc finger protein 318                                                     | Zfp318              | 1.56 | 0.016 | 1.18  | 0.345 | -1.49 | 0.159 | -1.05 | 0.602 | 1.35  | 0.898 |
| 1445064_at   | developmentally regulated repeat element-containing transcript 1            | Drr1                | 1.56 | 0.047 | 1.58  | 0.271 | 1.19  | 0.653 | -1.08 | 0.422 | 1.21  | 0.154 |
| 1437689_x_at | clusterin                                                                   | Clu                 | 1.56 | 0.001 | 1.09  | 0.888 | 1.31  | 0.524 | 1.14  | 0.761 | 1.65  | 0.559 |
| 1444449_at   | Ubiquitin specific peptidase 18                                             | Usp18               | 1.55 | 0.047 | 2.77  | 0.044 | -1.4  | 0.192 | 1.42  | 0.838 | 2.21  | 0.261 |
| 1458164_at   | hypothetical LOC552913                                                      | LOC552913           | 1.55 | 0.032 | 1.41  | 0.050 | 1.08  | 0.766 | 1.31  | 0.102 | -1.16 | 0.481 |
| 1438128_at   | Guanine nucleotide binding protein, alpha transducing 2                     | Gnat2               | 1.55 | 0.044 | 2.18  | 0.201 | 1.29  | 0.821 | 1.94  | 0.918 | 3.07  | 0.202 |
| 1446246_at   | gene model 438, (NCBI)                                                      | Gm438               | 1.55 | 0.042 | 1.1   | 0.892 | 1     | 0.956 | 1.26  | 0.858 | -1.49 | 0.217 |
| 1424549_at   | degenerative spermatocyte homolog 2 (Drosophila), lipid desaturase          | Degs2               | 1.55 | 0.030 | 1.14  | 0.628 | -1.22 | 0.284 | 2.79  | 0.306 | 1.01  | 0.675 |
| 1419698_at   | chemokine (C-X-C motif) ligand 11                                           | Cxcl11              | 1.55 | 0.011 | 1.65  | 0.896 | 2.31  | 0.130 | 1.56  | 0.322 | 2.38  | 0.460 |
| 1435892_at   | additional sex combs like 3 (Drosophila)                                    | Asxl3               | 1.55 | 0.011 | 1.48  | 0.632 | 3.59  | 0.198 | 1.44  | 0.640 | 1.08  | 0.675 |
| 1442126_at   | RIKEN cDNA 5830417C01 gene                                                  | 5830417C01Rik       | 1.55 | 0.013 | -1.05 | 0.758 | 1.03  | 0.723 | -1.08 | 0.627 | -1.12 | 0.426 |



|              |                                                                                |               |      |       |       |       |       |       |       |       |       |       |
|--------------|--------------------------------------------------------------------------------|---------------|------|-------|-------|-------|-------|-------|-------|-------|-------|-------|
| 1453116_at   | zinc finger protein 689                                                        | Zfp689        | 1.54 | 0.040 | 1.33  | 0.254 | -1.27 | 0.404 | 1.14  | 0.773 | -2.21 | 0.031 |
| 1441685_at   | proline synthetase co-transcribed                                              | Prosc         | 1.54 | 0.036 | 1.63  | 0.327 | -1.14 | 0.302 | -1.01 | 0.816 | 2.36  | 0.206 |
| 1455925_at   | PR domain containing 8                                                         | Prdm8         | 1.54 | 0.003 | 2.48  | 0.416 | 1.37  | 0.538 | 1.41  | 0.777 | 1.38  | 0.707 |
| 1439930_at   | SWI/SNF related, matrix associated, actin dependent regulator of chror Smarca2 |               | 1.53 | 0.001 | 1.28  | 0.791 | -1.39 | 0.083 | 1.12  | 0.817 | 1.2   | 0.398 |
| 1440924_at   | M-phase phosphoprotein 1                                                       | Mphosph1      | 1.53 | 0.025 | 1.08  | 0.780 | -1.4  | 0.282 | 1.32  | 0.066 | 1.09  | 0.465 |
| 1452411_at   | leucine rich repeat containing 1                                               | Lrrc1         | 1.53 | 0.049 | 1.68  | 0.727 | -1.09 | 0.523 | -1.21 | 0.133 | 1.11  | 0.840 |
| 1441493_at   | ELKS/RAB6-interacting/CAST family member 1                                     | Erc1          | 1.53 | 0.047 | 1.24  | 0.935 | 1.13  | 0.545 | -1    | 0.617 | -1.38 | 0.159 |
| 1435215_at   | AP1 gamma subunit binding protein 1                                            | Ap1gbp1       | 1.53 | 0.027 | 2.07  | 0.887 | 1.85  | 0.738 | -2.04 | 0.121 | -1.32 | 0.344 |
| 1436649_at   | zinc finger protein, subfamily 1A, 3 (Aiolos)                                  | Zfpn1a3       | 1.52 | 0.021 | 1.27  | 0.538 | 1.6   | 0.285 | 2.69  | 0.106 | -1.28 | 0.514 |
| 1449669_at   | RAB interacting factor                                                         | Rabif         | 1.52 | 0.006 | 1.44  | 0.100 | 1.63  | 0.339 | 1.25  | 0.507 | 1.95  | 0.123 |
| 1425071_s_at | neurotrophic tyrosine kinase, receptor, type 3                                 | Ntrk3         | 1.52 | 0.045 | 1.62  | 0.158 | 1.32  | 0.506 | 1.72  | 0.681 | 1.54  | 0.960 |
| 1422839_at   | neurogenin 2                                                                   | Neurog2       | 1.52 | 0.039 | 1.18  | 0.684 | 1.46  | 0.473 | -1.11 | 0.628 | -1.18 | 0.361 |
| 1443212_at   | Like-glycosyltransferase                                                       | Large         | 1.52 | 0.019 | 1.9   | 0.144 | 1.28  | 0.932 | 1.17  | 0.476 | 1.01  | 0.849 |
| 1433260_at   | RIKEN cDNA 4930500E03 gene                                                     | 4930500E03Rik | 1.52 | 0.002 | 1.29  | 0.537 | -1.02 | 0.517 | -1.12 | 0.927 | 1.28  | 0.966 |
| 1417620_at   | RAS-related C3 botulinum substrate 2                                           | Rac2          | 1.51 | 0.016 | 1.34  | 0.956 | -1.01 | 0.615 | -1.12 | 0.897 | 1.35  | 0.914 |
| 1423524_at   | microtubule associated serine/threonine kinase-like                            | Mastl         | 1.51 | 0.047 | 1.72  | 0.025 | 1.06  | 0.586 | 1.26  | 0.101 | 1.01  | 0.824 |
| 1448015_at   | RIKEN cDNA 2310047C04 gene                                                     | 2310047C04Rik | 1.51 | 0.009 | 1.45  | 0.474 | 1.44  | 0.855 | -1.08 | 0.430 | -2.19 | 0.072 |
| 1432097_a_at | DNA cross-link repair 1A, PSO2 homolog (S. cerevisiae)                         | Dclre1a       | 1.5  | 0.034 | 1.37  | 0.829 | 1.04  | 0.860 | 1.02  | 0.843 | 1.03  | 0.980 |
| 1456831_at   | AT rich interactive domain 5B (Mrf1 like)                                      | Arid5b        | 1.5  | 0.020 | 1.73  | 0.222 | -1.06 | 0.564 | -1.56 | 0.026 | -1.41 | 0.091 |
| 1433241_at   | RIKEN cDNA 9430013L17 gene                                                     | 9430013L17Rik | 1.5  | 0.002 | 1.39  | 0.718 | -1.48 | 0.177 | 2.71  | 0.528 | 1.34  | 0.793 |
| 1420719_at   | testis expressed gene 15                                                       | Tex15         | 1.49 | 0.024 | 1.49  | 0.261 | -1.05 | 0.647 | -1.13 | 0.692 | 1.42  | 0.883 |
| 1440633_at   | nei like 3 (E. coli)                                                           | Neil3         | 1.49 | 0.033 | 1.28  | 0.787 | 1.14  | 0.288 | 1.07  | 0.811 | 1.11  | 0.575 |
| 1452845_at   | hypoxia-inducible factor 1, alpha subunit inhibitor                            | Hif1an        | 1.49 | 0.028 | 1.42  | 0.481 | 1.32  | 0.311 | -1.39 | 0.119 | 1.07  | 0.626 |
| 1434675_at   | RIKEN cDNA 1700065O13 gene                                                     | 1700065O13Rik | 1.49 | 0.029 | 1.76  | 0.090 | 1.05  | 0.879 | 1.22  | 0.157 | 1.11  | 0.321 |
| 1437563_at   | PHD finger protein 20-like 1                                                   | Phf20l1       | 1.48 | 0.011 | 1.67  | 0.034 | 1.12  | 0.719 | 1.02  | 0.876 | 1.05  | 0.734 |
| 1449490_at   | methyl-CpG binding domain protein 4                                            | Mbd4          | 1.48 | 0.047 | 1.53  | 0.413 | 1.25  | 0.107 | 1.85  | 0.473 | 1.02  | 0.807 |
| 1432729_at   | RIKEN cDNA 5830415G21 gene                                                     | 5830415G21Rik | 1.48 | 0.003 | 2.09  | 0.161 | 1.28  | 0.671 | -1.04 | 0.451 | 1.1   | 0.409 |
| 1422970_at   | Max dimerization protein 3                                                     | Mxd3          | 1.47 | 0.050 | 1.71  | 0.010 | -1    | 0.697 | 1.19  | 0.350 | 1.23  | 0.366 |
| 1456103_at   | promyelocytic leukemia                                                         | Pml           | 1.46 | 0.025 | 2.28  | 0.001 | 1.7   | 0.132 | 1.26  | 0.189 | 1.13  | 0.235 |
| 1420939_at   | heparan sulfate 6-O-sulfotransferase 2                                         | Hs6st2        | 1.46 | 0.026 | 1.24  | 0.651 | -1.63 | 0.003 | -1.1  | 0.424 | 1.23  | 0.263 |
| 1446858_at   | expressed sequence AU022245                                                    | AU022245      | 1.46 | 0.041 | 1.74  | 0.289 | -1.36 | 0.126 | 1.06  | 0.997 | 1.19  | 0.093 |
| 1459446_at   | leucine rich repeat containing 41                                              | Lrrc41        | 1.45 | 0.013 | -1.15 | 0.286 | 1.16  | 0.996 | -1.69 | 0.073 | 1.62  | 0.296 |
| 1450206_at   | deleted in liver cancer 1                                                      | Dlc1          | 1.45 | 0.044 | 1.36  | 0.553 | 1.21  | 0.575 | 1.71  | 0.087 | 1.25  | 0.588 |
| 1444723_at   | RIKEN cDNA 6530418L21 gene                                                     | 6530418L21Rik | 1.45 | 0.037 | 2.38  | 0.026 | 1.2   | 0.384 | 1.03  | 0.879 | 1.07  | 0.747 |
| 1429734_at   | RIKEN cDNA 4632434I11 gene                                                     | 4632434I11Rik | 1.45 | 0.010 | 2.17  | 0.002 | 1.35  | 0.157 | 1.4   | 0.002 | 1.57  | 0.048 |
| 1426472_at   | zinc finger protein 52                                                         | Zfp52         | 1.44 | 0.034 | 2.33  | 0.024 | 1.45  | 0.028 | 1.45  | 0.196 | 1.2   | 0.699 |
| 1454954_at   | WD repeat domain 61                                                            | Wdr61         | 1.44 | 0.036 | 1.79  | 0.053 | 1.2   | 0.158 | 1.01  | 0.914 | 1.13  | 0.728 |
| 1423636_at   | WD repeat domain 31                                                            | Wdr31         | 1.44 | 0.036 | 1.16  | 0.757 | 1.26  | 0.245 | 1.22  | 0.377 | 1.34  | 0.727 |
| 1419105_at   | nuclear receptor subfamily 1, group H, member 4                                | Nr1h4         | 1.44 | 0.023 | 2.04  | 0.137 | 1.59  | 0.623 | 1.91  | 0.842 | 1.4   | 0.471 |
| 1450236_at   | forkhead box O3a                                                               | Foxo3a        | 1.44 | 0.002 | 2.56  | 0.184 | -1.53 | 0.140 | 1.53  | 0.909 | 1.57  | 0.908 |
| 1439176_at   | RIKEN cDNA E130120F12 gene                                                     | E130120F12Rik | 1.44 | 0.008 | 1.33  | 0.281 | 1.33  | 0.077 | 1.42  | 0.067 | -1.01 | 0.941 |

|              |                                                                                           |               |      |       |       |       |       |       |       |       |       |       |
|--------------|-------------------------------------------------------------------------------------------|---------------|------|-------|-------|-------|-------|-------|-------|-------|-------|-------|
| 1456764_at   | solute carrier family 35, member F3                                                       | Slc35f3       | 1.43 | 0.003 | 1.24  | 0.591 | 2.18  | 0.152 | 1.09  | 0.811 | 1.02  | 0.688 |
| 1451319_at   | SUMO1/sentrin specific peptidase 1                                                        | Senp1         | 1.43 | 0.035 | 1.61  | 0.088 | -1.11 | 0.572 | -1.07 | 0.404 | 1.07  | 0.658 |
| 1438891_at   | Catenin (cadherin associated protein), delta 2                                            | Ctnnd2        | 1.43 | 0.039 | 1.77  | 0.200 | -1.26 | 0.386 | 1.19  | 0.511 | -1.29 | 0.009 |
| 1425176_at   | C1q-like 3                                                                                | C1q13         | 1.43 | 0.042 | 1.78  | 0.034 | -1.28 | 0.240 | 1.15  | 0.315 | 1.34  | 0.288 |
| 1445430_at   | Rho GTPase activating protein 28                                                          | Arhgap28      | 1.43 | 0.002 | 1.18  | 0.388 | 1.15  | 0.525 | 1.15  | 0.605 | -1.24 | 0.354 |
| 1444175_at   | ADP-ribosylation factor guanine nucleotide-exchange factor 1(brefeldin Argef1             |               | 1.43 | 0.018 | 1.43  | 0.601 | 1.06  | 0.470 | 1.08  | 0.921 | -1.02 | 0.350 |
| 1456833_at   | G protein-coupled receptor 17                                                             | Gpr17         | 1.42 | 0.005 | 1.43  | 0.634 | 1.24  | 0.561 | -1.02 | 0.834 | 1.8   | 0.236 |
| 1439076_at   | DEAH (Asp-Glu-Ala-His) box polypeptide 29                                                 | Dhx29         | 1.42 | 0.043 | 1.53  | 0.132 | 1.11  | 0.498 | 1.5   | 0.178 | -1.08 | 0.676 |
| 1445543_at   | RIKEN cDNA 9830124H08 gene                                                                | 9830124H08Rik | 1.42 | 0.036 | 1.5   | 0.454 | 1.2   | 0.408 | 1.14  | 0.700 | -1.04 | 0.424 |
| 1457262_at   | RIKEN cDNA 2610207I05 gene                                                                | 2610207I05Rik | 1.42 | 0.039 | 1.14  | 0.369 | -1.32 | 0.061 | -1.17 | 0.159 | 1.08  | 0.806 |
| 1439033_at   | zinc finger, CCHC domain containing 7                                                     | Zcchc7        | 1.41 | 0.032 | -1    | 0.703 | -1.42 | 0.078 | -1.14 | 0.134 | -1.89 | 0.009 |
| 1455708_at   | Tropomodulin 3                                                                            | Tmod3         | 1.41 | 0.021 | 1.18  | 0.706 | 1.85  | 0.929 | 2.29  | 0.484 | -1.17 | 0.484 |
| 1449169_at   | hyaluronan synthase 2                                                                     | Has2          | 1.41 | 0.023 | 1.81  | 0.113 | 1.36  | 0.005 | 1.39  | 0.003 | 1.38  | 0.023 |
| 1432492_a_at | 3-hydroxyanthranilate 3,4-dioxygenase                                                     | Haa0          | 1.41 | 0.003 | 1.12  | 0.534 | -1.14 | 0.295 | -1.07 | 0.528 | -1.25 | 0.285 |
| 1427709_at   | glutamate receptor, ionotropic, kainate 3                                                 | Grik3         | 1.41 | 0.008 | 1.35  | 0.150 | 1.15  | 0.455 | -1.04 | 0.652 | 1.02  | 0.880 |
| 1459979_x_at | zinc finger protein 68                                                                    | Zfp68         | 1.4  | 0.029 | 1.72  | 0.104 | 1.08  | 0.706 | -1.05 | 0.453 | 1.67  | 0.179 |
| 1453607_at   | microfibrillar-associated protein 3-like                                                  | Mfap3l        | 1.4  | 0.046 | 1.71  | 0.056 | -1.53 | 0.073 | 1.02  | 0.832 | 1.22  | 0.380 |
| 1455489_at   | leucine rich repeat transmembrane neuronal 2                                              | Lrrtm2        | 1.4  | 0.016 | 2.63  | 0.018 | 1.71  | 0.103 | 2     | 0.012 | 2.11  | 0.055 |
| 1457033_at   | gene model 397, (NCBI) /// Mus musculus sequence XM_486399 /// sir Gm397 /// XM_486399 // |               | 1.4  | 0.004 | -1.07 | 0.626 | 1.36  | 0.767 | -1.38 | 0.218 | 1.25  | 0.972 |
| 1456605_at   | CCAAT/enhancer binding protein (C/EBP), delta                                             | Cebpd         | 1.4  | 0.033 | 1.07  | 0.668 | 1.76  | 0.257 | 1.23  | 0.981 | 1.25  | 0.098 |
| 1436219_at   | RIKEN cDNA 4933403F05 gene                                                                | 4933403F05Rik | 1.4  | 0.038 | 2.63  | 0.005 | 1.56  | 0.008 | 1.75  | 0.002 | 1.69  | 0.008 |
| 1437257_at   | WD repeat domain 47                                                                       | Wdr47         | 1.39 | 0.022 | 1.23  | 0.499 | 2     | 0.762 | 1.18  | 0.969 | -1.25 | 0.292 |
| 1416571_at   | Tnf receptor associated factor 4                                                          | Traf4         | 1.39 | 0.041 | 2.03  | 0.000 | 1.36  | 0.110 | 1.08  | 0.484 | 1.73  | 0.048 |
| 1429327_at   | serologically defined colon cancer antigen 1                                              | Sdccag1       | 1.39 | 0.043 | 1.43  | 0.349 | -1.1  | 0.531 | 1.03  | 0.769 | -1.43 | 0.003 |
| 1459247_at   | ATP/GTP binding protein-like 3                                                            | Agbl3         | 1.39 | 0.039 | 1.18  | 0.811 | 1.13  | 0.997 | -1.3  | 0.118 | -1.13 | 0.526 |
| 1437818_at   | RIKEN cDNA 9430016H08 gene                                                                | 9430016H08Rik | 1.39 | 0.031 | 1.09  | 0.938 | -1.18 | 0.185 | 1.08  | 0.897 | 1.15  | 0.762 |
| 1429198_at   | RIKEN cDNA 1810030O07 gene                                                                | 1810030O07Rik | 1.39 | 0.005 | 1.51  | 0.036 | 1.13  | 0.187 | 1.21  | 0.122 | 1.15  | 0.258 |
| 1432555_at   | whirlin                                                                                   | Whrn          | 1.38 | 0.028 | 1.36  | 0.405 | 1.83  | 0.386 | 1.17  | 0.912 | 1.11  | 0.462 |
| 1451080_at   | ubiquitin specific peptidase 1                                                            | Usp1          | 1.38 | 0.036 | 1.7   | 0.011 | 1.28  | 0.022 | 1.17  | 0.029 | 1.25  | 0.042 |
| 1443178_at   | ring finger protein 13                                                                    | Rnf13         | 1.38 | 0.039 | 1.9   | 0.050 | 1.69  | 0.794 | 1.19  | 0.822 | 1.35  | 0.297 |
| 1424156_at   | retinoblastoma-like 1 (p107)                                                              | Rbl1          | 1.38 | 0.021 | 1.43  | 0.000 | 1.22  | 0.035 | 1.08  | 0.197 | 1.29  | 0.032 |
| 1427771_x_at | integrin beta 1 (fibronectin receptor beta)                                               | Itgb1         | 1.38 | 0.006 | 1.12  | 0.908 | 1.12  | 0.503 | 1.09  | 0.563 | -1.19 | 0.236 |
| 1415988_at   | high density lipoprotein (HDL) binding protein                                            | Hdlbp         | 1.38 | 0.035 | 1.09  | 0.784 | -1.05 | 0.501 | 1.19  | 0.581 | 1.22  | 0.590 |
| 1435299_at   | hypothetical protein C230069N13                                                           | C230069N13    | 1.38 | 0.040 | 1.03  | 0.865 | 1.22  | 0.481 | -1.23 | 0.130 | -1.19 | 0.228 |
| 1419574_at   | zinc finger protein 292                                                                   | Zfp292        | 1.37 | 0.033 | 1.24  | 0.569 | -1.04 | 0.621 | -1.14 | 0.424 | -1.03 | 0.663 |
| 1433899_x_at | TSC22 domain family, member 1                                                             | Tsc22d1       | 1.37 | 0.037 | 1.5   | 0.029 | 1.38  | 0.152 | 1.27  | 0.074 | 1.27  | 0.203 |
| 1440936_at   | serine active site containing 1                                                           | Serac1        | 1.37 | 0.030 | 1.56  | 0.229 | 1.92  | 0.279 | 1.12  | 0.099 | 1.36  | 0.112 |
| 1426421_s_at | RNA binding motif protein 26                                                              | Rbm26         | 1.37 | 0.007 | 1.14  | 0.612 | 1.16  | 0.232 | -1.06 | 0.550 | -1.13 | 0.129 |
| 1453405_at   | phospholipase A2, group IVD                                                               | Pla2g4d       | 1.37 | 0.037 | 1.34  | 0.268 | 2.01  | 0.063 | -1.01 | 0.657 | 1.24  | 0.078 |
| 1436281_at   | Similar to hypothetical protein FLJ38281                                                  | LOC245305     | 1.37 | 0.039 | 1.57  | 0.039 | 1.04  | 0.951 | 1.1   | 0.159 | -1.02 | 0.868 |
| 1427081_at   | RIKEN cDNA A630072M18 gene                                                                | A630072M18Rik | 1.37 | 0.028 | 1.72  | 0.008 | 1.41  | 0.185 | 1.17  | 0.040 | 1.4   | 0.031 |

|              |                                                                            |                         |      |       |       |       |       |       |       |       |       |       |
|--------------|----------------------------------------------------------------------------|-------------------------|------|-------|-------|-------|-------|-------|-------|-------|-------|-------|
| 1434689_at   | zinc finger protein 637                                                    | Zfp637                  | 1.36 | 0.042 | 1.48  | 0.006 | 1.26  | 0.027 | 1.11  | 0.310 | 1.31  | 0.020 |
| 1450090_at   | zinc finger protein 101                                                    | Zfp101                  | 1.36 | 0.002 | 1.19  | 0.136 | 1.12  | 0.507 | 1.42  | 0.037 | -1.08 | 0.374 |
| 1454977_at   | expressed sequence AU020772                                                | AU020772                | 1.36 | 0.045 | -1.02 | 0.546 | 1.09  | 0.592 | -1.11 | 0.341 | 1.05  | 0.500 |
| 1458868_at   | ATPase, Na+/K+ transporting, alpha 1 polypeptide                           | Atp1a1                  | 1.36 | 0.042 | 1.17  | 0.304 | 2.31  | 0.844 | 2.49  | 0.567 | 1.29  | 0.954 |
| 1430097_at   | RIKEN cDNA 8430436C05 gene                                                 | 8430436C05Rik           | 1.36 | 0.007 | 1.77  | 0.472 | 1.48  | 0.386 | 1.41  | 0.321 | -1.24 | 0.257 |
| 1446949_at   | RIKEN cDNA 4930431P19 gene                                                 | 4930431P19Rik           | 1.36 | 0.039 | 1.02  | 0.779 | 1.12  | 0.798 | 1.13  | 0.576 | 1.39  | 0.807 |
| 1450417_a_at | ribosomal protein S20 /// similar to 40S ribosomal protein S20 /// similar | Rps20 /// LOC245676 /// | 1.35 | 0.045 | 1.55  | 0.049 | 1.9   | 0.449 | 1.25  | 0.412 | 1.59  | 0.016 |
| 1422207_at   | 5-hydroxytryptamine (serotonin) receptor 5A                                | Htr5a                   | 1.35 | 0.030 | 4.12  | 0.309 | 1.22  | 0.724 | 1.95  | 0.056 | -1.01 | 0.996 |
| 1417541_at   | helicase, lymphoid specific                                                | Hells                   | 1.35 | 0.006 | 1.58  | 0.003 | 1.17  | 0.184 | 1.06  | 0.635 | 1.1   | 0.290 |
| 1422160_at   | histocompatibility 2, T region locus 24                                    | H2-T24                  | 1.35 | 0.027 | 1.54  | 0.105 | -1.1  | 0.237 | -1.03 | 0.698 | 1.37  | 0.635 |
| 1455004_at   | DNA segment, Chr 2, Wayne State University 81, expressed                   | D2Wsu81e                | 1.35 | 0.045 | 3.11  | 0.404 | 1.24  | 0.942 | -1.16 | 0.345 | 1.18  | 0.466 |
| 1458873_at   | asp (abnormal spindle)-like, microcephaly associated (Drosophila)          | Aspm                    | 1.35 | 0.019 | 1.52  | 0.006 | 1.03  | 0.789 | 1.09  | 0.061 | -1.01 | 0.934 |
| 1427832_at   | tubulin alpha, related sequence 1                                          | Tuba-rs1                | 1.34 | 0.037 | 1.11  | 0.984 | 1.01  | 0.774 | -1.05 | 0.505 | 1.02  | 0.942 |
| 1417342_at   | protein phosphatase 1, regulatory (inhibitor) subunit 2                    | Ppp1r2                  | 1.34 | 0.031 | 1.22  | 0.065 | -1    | 0.814 | -1.03 | 0.682 | 1.32  | 0.092 |
| 1416505_at   | nuclear receptor subfamily 4, group A, member 1                            | Nr4a1                   | 1.34 | 0.031 | 2.01  | 0.033 | 1.48  | 0.004 | 1.38  | 0.001 | 1.56  | 0.010 |
| 1427083_a_at | mitogen-activated protein kinase kinase kinase kinase 5                    | Map4k5                  | 1.34 | 0.048 | 1.25  | 0.413 | -1.04 | 0.532 | -1.19 | 0.061 | -1.31 | 0.248 |
| 1431284_a_at | RIKEN cDNA 2210013K02 gene                                                 | 2210013K02Rik           | 1.34 | 0.010 | 1.24  | 0.400 | 1.06  | 0.780 | 1.04  | 0.430 | -1    | 0.820 |
| 1429131_at   | ubiquitin-conjugating enzyme E2 variant 2                                  | Ube2v2                  | 1.33 | 0.015 | 1.46  | 0.251 | -1.09 | 0.229 | 1.02  | 0.681 | -1.13 | 0.544 |
| 1434695_at   | denticleless homolog (Drosophila)                                          | Dtl                     | 1.33 | 0.004 | 1.55  | 0.013 | 1.12  | 0.272 | 1.05  | 0.294 | 1.25  | 0.031 |
| 1455411_at   | aquaporin 11                                                               | Aqp11                   | 1.33 | 0.044 | 1.09  | 0.836 | 1.61  | 0.329 | 1.27  | 0.415 | -1.16 | 0.564 |
| 1457566_at   | RIKEN cDNA A830058L05 gene                                                 | A830058L05Rik           | 1.33 | 0.012 | 1.09  | 0.048 | -1.12 | 0.368 | 1.07  | 0.465 | 1.24  | 0.056 |
| 1431955_at   | RIKEN cDNA 4930453H23 gene                                                 | 4930453H23Rik           | 1.33 | 0.000 | 1.55  | 0.644 | -2.16 | 0.008 | -1.31 | 0.258 | 1.71  | 0.262 |
| 1447973_at   | thyroid hormone receptor interactor 11                                     | Trip11                  | 1.32 | 0.036 | 1.07  | 0.998 | -1.26 | 0.273 | -1.07 | 0.503 | -1.09 | 0.323 |
| 1427253_s_at | suppressor of zeste 12 homolog (Drosophila)                                | Suz12                   | 1.32 | 0.040 | 1.39  | 0.164 | 1.08  | 0.284 | 1.01  | 0.878 | -1.08 | 0.048 |
| 1448506_at   | serine (or cysteine) peptidase inhibitor, clade A, member 6                | Serpina6                | 1.32 | 0.036 | 1.23  | 0.131 | 2.63  | 0.144 | 1.5   | 0.995 | 2.2   | 0.225 |
| 1443708_at   | cDNA sequence BC068281                                                     | BC068281                | 1.32 | 0.020 | 1.84  | 0.232 | 2.47  | 0.359 | 2.11  | 0.062 | 1.99  | 0.082 |
| 1425483_at   | thymocyte selection-associated HMG box gene                                | Tox                     | 1.31 | 0.038 | 1.12  | 0.722 | -1.1  | 0.508 | -1.22 | 0.286 | 1.78  | 0.865 |
| 1438424_at   | TBC1 domain family, member 24                                              | Tbc1d24                 | 1.31 | 0.009 | 1.3   | 0.164 | 1.06  | 0.753 | 1.16  | 0.773 | 1.4   | 0.421 |
| 1452179_at   | PHD finger protein 17                                                      | Phf17                   | 1.31 | 0.049 | 1.51  | 0.177 | 1.2   | 0.063 | 1     | 0.881 | -1.01 | 0.706 |
| 1423218_a_at | mitochondrial ribosomal protein L49                                        | Mrpl49                  | 1.31 | 0.017 | 1.85  | 0.007 | 1.24  | 0.006 | 1.36  | 0.009 | 1.29  | 0.096 |
| 1419196_at   | hepcidin antimicrobial peptide 1                                           | Hamp1                   | 1.31 | 0.025 | 1.64  | 0.215 | -1.09 | 0.589 | -1.05 | 0.545 | -1.05 | 0.650 |
| 1426612_at   | timeless interacting protein                                               | Tipin                   | 1.3  | 0.029 | 1.52  | 0.010 | 1.06  | 0.072 | 1.11  | 0.072 | 1.07  | 0.099 |
| 1447827_x_at | speckle-type POZ protein                                                   | Spop                    | 1.3  | 0.006 | 1.03  | 0.285 | -1.05 | 0.654 | -1.28 | 0.083 | -1.06 | 0.173 |
| 1449272_at   | immunoglobulin superfamily, member 4B                                      | Igsf4b                  | 1.3  | 0.023 | 1.2   | 0.587 | 1.05  | 0.823 | 1.62  | 0.519 | -1.23 | 0.100 |
| 1449116_a_at | deoxythymidylate kinase                                                    | Dtymk                   | 1.3  | 0.011 | 1.24  | 0.006 | 1.06  | 0.517 | -1    | 0.982 | 1.15  | 0.124 |
| 1417458_s_at | CDC28 protein kinase regulatory subunit 2                                  | Cks2                    | 1.3  | 0.041 | 1.24  | 0.058 | 1.04  | 0.521 | 1.07  | 0.033 | 1.15  | 0.005 |
| 1442429_at   | Adaptor protein complex AP-2, mu1                                          | Ap2m1                   | 1.3  | 0.002 | 1.11  | 0.863 | 1.3   | 0.006 | 1.37  | 0.792 | -1.57 | 0.117 |
| 1429665_at   | RIKEN cDNA 6230416J20 gene                                                 | 6230416J20Rik           | 1.3  | 0.031 | 1.24  | 0.021 | 1.26  | 0.022 | 1.26  | 0.408 | 1.03  | 0.621 |
| 1429660_s_at | structural maintenance of chromosomes 2                                    | Smc2                    | 1.29 | 0.026 | 1.06  | 0.546 | -1.11 | 0.103 | -1.1  | 0.312 | -1.06 | 0.591 |
| 1425498_at   | PRP4 pre-mRNA processing factor 4 homolog B (yeast)                        | Prpf4b                  | 1.29 | 0.033 | 1.63  | 0.020 | 1.08  | 0.075 | -1.04 | 0.498 | -1.07 | 0.078 |
| 1450244_a_at | mitogen activated protein kinase kinase kinase kinase 2                    | Map4k2                  | 1.29 | 0.012 | 1.13  | 0.481 | -1.04 | 0.627 | -1.11 | 0.149 | 1.1   | 0.548 |

|              |                                                                         |                         |      |       |       |       |       |       |       |       |       |       |
|--------------|-------------------------------------------------------------------------|-------------------------|------|-------|-------|-------|-------|-------|-------|-------|-------|-------|
| 1448984_at   | excision repair cross-complementing rodent repair deficiency, comple    | Ercc4                   | 1.29 | 0.043 | 1.45  | 0.060 | 1.11  | 0.662 | 1.14  | 0.323 | 1.38  | 0.439 |
| 1442579_at   | RIKEN cDNA 9330111N05 gene                                              | 9330111N05Rik           | 1.29 | 0.049 | 2.39  | 0.516 | 1.24  | 0.831 | 1.64  | 0.209 | 1.82  | 0.121 |
| 1453968_at   | RIKEN cDNA 4833439F03 gene                                              | 4833439F03Rik           | 1.29 | 0.039 | -1.06 | 0.478 | -1.05 | 0.378 | -1.11 | 0.398 | -1    | 0.806 |
| 1418251_at   | tubby-like protein 3                                                    | Tulp3                   | 1.28 | 0.049 | 1.26  | 0.365 | -1.13 | 0.563 | 1.05  | 0.774 | 2.39  | 0.179 |
| 1436184_at   | gene model 632, (NCBI)                                                  | Gm632                   | 1.28 | 0.004 | 1.38  | 0.068 | 1.15  | 0.234 | -1.18 | 0.157 | 1.13  | 0.073 |
| 1418027_at   | exonuclease 1                                                           | Exo1                    | 1.28 | 0.025 | 1.73  | 0.002 | 1.24  | 0.305 | 1.42  | 0.078 | -1    | 0.859 |
| 1434981_at   | RIKEN cDNA E130303B06 gene                                              | E130303B06Rik           | 1.28 | 0.005 | 1.42  | 0.029 | 1.23  | 0.277 | 1.02  | 0.574 | 1.32  | 0.160 |
| 1418585_at   | cyclin H                                                                | Ccnh                    | 1.28 | 0.019 | 1.26  | 0.143 | 1.24  | 0.037 | 1.16  | 0.189 | 1.4   | 0.048 |
| 1439020_at   | expressed sequence AW146020                                             | AW146020                | 1.28 | 0.039 | 1.44  | 0.042 | 1.01  | 0.832 | -1.03 | 0.657 | 1.13  | 0.057 |
| 1434791_at   | ATPase, H+ transporting, lysosomal V0 subunit A2                        | Atp6v0a2                | 1.28 | 0.049 | 1.28  | 0.035 | 1.03  | 0.606 | 1.25  | 0.138 | 1.08  | 0.490 |
| 1439038_at   | RIKEN cDNA 9130227C08Rik gene                                           | 9130227C08Rik           | 1.28 | 0.032 | 1.31  | 0.386 | -1.22 | 0.160 | -1.11 | 0.355 | 1.01  | 0.971 |
| 1453183_at   | RIKEN cDNA 1110034A24 gene                                              | 1110034A24Rik           | 1.28 | 0.043 | 1.56  | 0.001 | 1.21  | 0.066 | 1.08  | 0.496 | 1.18  | 0.193 |
| 1423440_at   | RIKEN cDNA 1110001A07 gene                                              | 1110001A07Rik           | 1.28 | 0.020 | 1.32  | 0.226 | 1.16  | 0.313 | 1.24  | 0.004 | 1.14  | 0.516 |
| 1425410_at   | Tp53rk binding protein                                                  | Tprkb                   | 1.27 | 0.032 | 1.48  | 0.312 | 1.1   | 0.505 | -1.02 | 0.607 | 1.1   | 0.842 |
| 1439358_a_at | neurexin I                                                              | Nrxn1                   | 1.27 | 0.045 | 1.6   | 0.124 | 1.48  | 0.615 | -1.04 | 0.607 | -1.14 | 0.024 |
| 1460200_s_at | leucine zipper transcription factor-like 1                              | Lztf11                  | 1.27 | 0.007 | 1.1   | 0.256 | 1.25  | 0.347 | 1.02  | 0.942 | 1.19  | 0.467 |
| 1452315_at   | kinesin family member 11                                                | Kif11                   | 1.27 | 0.015 | 1.01  | 0.763 | -1.13 | 0.629 | 1.1   | 0.399 | -1.02 | 0.793 |
| 1448719_at   | transcriptional adaptor 3 (NGG1 homolog, yeast)-like                    | Tada3l                  | 1.26 | 0.031 | 1.04  | 0.813 | -1.04 | 0.648 | -1.52 | 0.212 | 1.85  | 0.240 |
| 1452115_a_at | polo-like kinase 4 (Drosophila)                                         | Plk4                    | 1.26 | 0.010 | 1.19  | 0.074 | 1     | 0.682 | 1.07  | 0.147 | 1.06  | 0.959 |
| 1456748_a_at | 4-nitrophenylphosphatase domain and non-neuronal SNAP25-like prot       | Nipsnap1                | 1.26 | 0.041 | 1.2   | 0.727 | 2.93  | 0.134 | 1.11  | 0.782 | 1.35  | 0.002 |
| 1421362_a_at | fyn-related kinase                                                      | Frk                     | 1.26 | 0.002 | 1.1   | 0.742 | -1.05 | 0.562 | -1.07 | 0.512 | 1.1   | 0.264 |
| 1416333_at   | docking protein 2                                                       | Dok2                    | 1.26 | 0.031 | 1.62  | 0.495 | 1.04  | 0.520 | 1.14  | 0.466 | -1.06 | 0.565 |
| 1434030_at   | cDNA sequence BC034507                                                  | BC034507                | 1.26 | 0.014 | 1.67  | 0.016 | 1.31  | 0.165 | 1.07  | 0.711 | 1.16  | 0.342 |
| 1439758_at   | amyotrophic lateral sclerosis 2 (juvenile) chromosome region, candidat  | Als2cr12                | 1.26 | 0.022 | 1.3   | 0.138 | 1.61  | 0.003 | 1.36  | 0.065 | 1.25  | 0.310 |
| 1449105_at   | SH2 domain protein 2A                                                   | Sh2d2a                  | 1.25 | 0.037 | 1.12  | 0.283 | -1.04 | 0.638 | 1.45  | 0.361 | 1.18  | 0.102 |
| 1426075_at   | klotho beta                                                             | Klb                     | 1.25 | 0.042 | 1.37  | 0.084 | -1.08 | 0.511 | -1.12 | 0.354 | 1.1   | 0.494 |
| 1456280_at   | claspin homolog (Xenopus laevis)                                        | Clspn                   | 1.25 | 0.013 | 1.58  | 0.007 | 1.11  | 0.244 | 1.08  | 0.420 | 1.16  | 0.119 |
| 1452128_a_at | BRCA1/BRCA2-containing complex, subunit 3                               | Brcc3                   | 1.25 | 0.036 | 1.15  | 0.012 | 1.17  | 0.060 | 1.15  | 0.171 | 1.04  | 0.704 |
| 1436049_at   | RIKEN cDNA 5730589K01 gene                                              | 5730589K01Rik           | 1.25 | 0.021 | 1.37  | 0.012 | 1.33  | 0.016 | 1.1   | 0.100 | 1.12  | 0.699 |
| 1420661_a_at | RIKEN cDNA 4933439F18 gene                                              | 4933439F18Rik           | 1.25 | 0.002 | 1.27  | 0.090 | -1.08 | 0.320 | 1.13  | 0.355 | -1.14 | 0.080 |
| 1432252_a_at | RIKEN cDNA 4933406K04 gene                                              | 4933406K04Rik           | 1.25 | 0.034 | 1.09  | 0.533 | 1.85  | 0.206 | 1.04  | 0.865 | 1.85  | 0.459 |
| 1456731_x_at | Polymerase (RNA) III (DNA directed) polypeptide K                       | Polr3k                  | 1.24 | 0.025 | 1.18  | 0.165 | 3.14  | 0.204 | 1.11  | 0.015 | 1.28  | 0.066 |
| 1428615_at   | purinergic receptor P2Y, G-protein coupled, 5                           | P2ry5                   | 1.24 | 0.018 | 1.7   | 0.043 | 1.44  | 0.019 | 1.35  | 0.009 | 1.52  | 0.011 |
| 1457739_at   | fascin homolog 1, actin bundling protein (Strongylocentrotus purpuratu  | Fscn1                   | 1.24 | 0.017 | 1.12  | 0.649 | -1.05 | 0.428 | -1.16 | 0.472 | 1.97  | 0.303 |
| 1457213_a_at | diacylglycerol kinase, eta                                              | Dgkh                    | 1.24 | 0.016 | -1.04 | 0.806 | -1.01 | 0.656 | -1.26 | 0.092 | -1.26 | 0.071 |
| 1442424_at   | CTD (carboxy-terminal domain, RNA polymerase II, polypeptide A) sm      | Ctdspl2                 | 1.24 | 0.019 | 1.22  | 0.638 | 1.98  | 0.801 | 1.14  | 0.929 | 1.19  | 0.810 |
| 1417175_at   | casein kinase 1, epsilon                                                | Csnk1e                  | 1.24 | 0.008 | 1.21  | 0.163 | 1.21  | 0.172 | -1    | 0.846 | 1.04  | 0.924 |
| 1420908_at   | CD2-associated protein                                                  | Cd2ap                   | 1.24 | 0.046 | 1.22  | 0.668 | 1.01  | 0.846 | -1.13 | 0.294 | -1.26 | 0.204 |
| 1436229_at   | CDNA sequence BC049806                                                  | BC049806                | 1.24 | 0.005 | 1.07  | 0.644 | -1.11 | 0.371 | -1.12 | 0.312 | -1.2  | 0.076 |
| 1425907_s_at | angiominin                                                              | Amot                    | 1.24 | 0.039 | 1.08  | 0.683 | 1.05  | 0.969 | 1.17  | 0.991 | -1.07 | 0.549 |
| 1436574_at   | RIKEN cDNA 1700029I01 gene /// similar to zinc finger protein 665 /// s | 1700029I01Rik /// LOC66 | 1.24 | 0.039 | 1.14  | 0.610 | 1.04  | 0.800 | -1.03 | 0.619 | -1.15 | 0.128 |

|              |                                                                                |                    |       |       |       |       |       |       |       |       |       |       |
|--------------|--------------------------------------------------------------------------------|--------------------|-------|-------|-------|-------|-------|-------|-------|-------|-------|-------|
| 1426993_at   | xenotropic and polytropic retrovirus receptor 1                                | Xpr1               | 1.23  | 0.032 | 1.12  | 0.417 | -1.15 | 0.176 | 1.07  | 0.792 | -1.11 | 0.486 |
| 1436012_s_at | secernin 2                                                                     | Scrn2              | 1.23  | 0.013 | 2.39  | 0.397 | -1.15 | 0.392 | 1.74  | 0.053 | 1.16  | 0.500 |
| 1458193_at   | peripheral myelin protein 2                                                    | Pmp2               | 1.23  | 0.001 | 1.14  | 0.297 | -1.03 | 0.361 | 1.01  | 0.914 | 1     | 0.838 |
| 1430617_at   | Opa interacting protein 5                                                      | Oip5               | 1.23  | 0.007 | 1.1   | 0.549 | 1.27  | 0.155 | 1.3   | 0.328 | 1.04  | 0.438 |
| 1430442_at   | nitric oxide synthase 1 (neuronal) adaptor protein                             | Nos1ap             | 1.23  | 0.045 | 1.55  | 0.278 | -1.25 | 0.216 | -1.03 | 0.669 | 1.41  | 0.054 |
| 1431066_at   | fucosyltransferase 11                                                          | Fut11              | 1.23  | 0.034 | 1.28  | 0.018 | -1.04 | 0.828 | 1.43  | 0.059 | 1.37  | 0.263 |
| 1422033_a_at | ciliary neurotrophic factor /// zinc finger protein 91                         | Cntf /// Zfp91     | 1.23  | 0.011 | 1.55  | 0.048 | 1.2   | 0.202 | 1.21  | 0.056 | 1.26  | 0.103 |
| 1434767_at   | expressed sequence C79407                                                      | C79407             | 1.23  | 0.014 | 1.09  | 0.545 | 1.1   | 0.681 | 1.02  | 0.866 | -1.13 | 0.057 |
| 1425531_at   | zinc finger, HIT domain containing 1                                           | Znhit1             | 1.22  | 0.043 | 1.18  | 0.058 | 1.03  | 0.451 | 1.02  | 0.695 | 1.08  | 0.212 |
| 1421718_at   | striamin                                                                       | Strm               | 1.22  | 0.036 | 1.71  | 0.332 | 1.11  | 0.505 | -1.3  | 0.100 | 1.08  | 0.381 |
| 1423318_at   | RAD18 homolog (S. cerevisiae)                                                  | Rad18              | 1.22  | 0.019 | 1.03  | 0.950 | 1.06  | 0.365 | -1.07 | 0.380 | 1.04  | 0.498 |
| 1415679_at   | presenilin enhancer 2 homolog (C. elegans)                                     | Psenen             | 1.22  | 0.039 | 1.15  | 0.181 | 1.13  | 0.153 | 1.09  | 0.096 | 1.03  | 0.856 |
| 1448527_at   | programmed cell death 10                                                       | Pdcd10             | 1.22  | 0.004 | 1.2   | 0.155 | 1.03  | 0.307 | -1.09 | 0.348 | -1.09 | 0.275 |
| 1455901_at   | choline phosphotransferase 1                                                   | Chpt1              | 1.22  | 0.047 | 1.35  | 0.077 | 1.4   | 0.130 | -1.05 | 0.495 | -1.01 | 0.995 |
| 1441529_at   | RIKEN cDNA 9130230N09 gene                                                     | 9130230N09Rik      | 1.22  | 0.046 | -1.62 | 0.176 | 1.02  | 0.517 | 1.57  | 0.973 | -1.16 | 0.580 |
| 1435615_at   | zinc finger protein 365                                                        | Zfp365             | 1.21  | 0.024 | 1.41  | 0.429 | 2.06  | 0.049 | 1.03  | 0.924 | 1.04  | 0.557 |
| 1456041_at   | sorting nexin 16                                                               | Snx16              | 1.21  | 0.016 | 1.43  | 0.047 | 1.08  | 0.253 | 1.02  | 0.370 | 1.15  | 0.123 |
| 1417037_at   | origin recognition complex, subunit 6-like (S. cerevisiae)                     | Orc6l              | 1.21  | 0.006 | 1.51  | 0.035 | 1.16  | 0.047 | 1.18  | 0.018 | 1.2   | 0.052 |
| 1416298_at   | matrix metalloproteinase 9                                                     | Mmp9               | 1.21  | 0.019 | 1.05  | 0.846 | -1.24 | 0.160 | 1     | 0.991 | 2.04  | 0.501 |
| 1451922_at   | lectin, mannose-binding 1 like                                                 | Lman1l             | 1.21  | 0.008 | 1.17  | 0.195 | 1.3   | 0.313 | 1.01  | 0.926 | 1.11  | 0.537 |
| 1426284_at   | keratin 20                                                                     | Krt20              | 1.21  | 0.030 | 1.3   | 0.005 | 1.25  | 0.035 | 1.07  | 0.145 | 1.23  | 0.123 |
| 1447495_at   | fibronectin type 3 and ankyrin repeat domains 1                                | Fank1              | 1.21  | 0.018 | 1.85  | 0.013 | -1.58 | 0.192 | 1.66  | 0.640 | 2.7   | 0.556 |
| 1416143_at   | ATP synthase, H+ transporting, mitochondrial F0 complex, subunit F             | Atp5j              | 1.21  | 0.028 | 1.22  | 0.020 | 1.07  | 0.141 | 1.08  | 0.033 | 1.03  | 0.304 |
| 1415680_at   | anaphase promoting complex subunit 1                                           | Anapc1             | 1.21  | 0.048 | 1.01  | 0.864 | 1.05  | 0.974 | -1.03 | 0.606 | -1.12 | 0.118 |
| 1419262_at   | acyl-Coenzyme A dehydrogenase family, member 8                                 | Acad8              | 1.21  | 0.047 | 1.43  | 0.010 | 1.19  | 0.021 | 1.12  | 0.062 | 1.07  | 0.320 |
| 1455538_at   | RIKEN cDNA 6330403M23 gene                                                     | 6330403M23Rik      | 1.21  | 0.020 | 1.05  | 0.885 | 1.16  | 0.178 | 1.27  | 0.085 | -1.01 | 0.517 |
| 1417830_at   | structural maintenance of chromosomes 1A                                       | Smc1a              | 1.2   | 0.031 | 1.12  | 0.153 | 1.06  | 0.170 | 1.01  | 0.947 | -1.03 | 0.144 |
| 1422108_at   | protein phosphatase 1, regulatory (inhibitor) subunit 3A                       | Ppp1r3a            | 1.2   | 0.007 | 1.09  | 0.958 | 1.23  | 0.781 | 1.52  | 0.416 | -1.01 | 0.863 |
| 1428985_at   | integrator complex subunit 12                                                  | Ints12             | 1.2   | 0.026 | 1.36  | 0.029 | 1.29  | 0.080 | 1.2   | 0.218 | 1.28  | 0.027 |
| 1445380_at   | RIKEN cDNA A230072C01 gene                                                     | A230072C01Rik      | 1.2   | 0.019 | -1.34 | 0.299 | -1.07 | 0.262 | -1.02 | 0.800 | -1.19 | 0.257 |
| 1420548_a_at | RIKEN cDNA 2310008H09 gene                                                     | 2310008H09Rik      | 1.2   | 0.028 | 1.37  | 0.004 | 1.12  | 0.140 | 1.15  | 0.264 | 1.07  | 0.666 |
| 1429111_at   | talín 2 /// similar to talín 2                                                 | Tln2 /// LOC639214 | -1.2  | 0.033 | -1.68 | 0.002 | -1.46 | 0.005 | -1.41 | 0.006 | -1.5  | 0.005 |
| 1416207_at   | tafazzin                                                                       | Taz                | -1.2  | 0.043 | -1.2  | 0.081 | 1.03  | 0.452 | -1.06 | 0.090 | 1.03  | 0.500 |
| 1449815_a_at | single-stranded DNA binding protein 2                                          | Ssbp2              | -1.2  | 0.017 | -2.62 | 0.010 | -1.42 | 0.033 | -1.2  | 0.086 | -1.4  | 0.001 |
| 1436272_at   | RAB3 GTPase activating protein subunit 2                                       | Rab3gap2           | -1.2  | 0.011 | -1.51 | 0.003 | 1.01  | 0.889 | -1.08 | 0.551 | -1.27 | 0.030 |
| 1426755_at   | cytoskeleton-associated protein 4                                              | Ckap4              | -1.2  | 0.015 | -1.22 | 0.045 | -1.26 | 0.045 | 1.03  | 0.775 | 1.05  | 0.553 |
| 1456930_at   | calmodulin regulated spectrin-associated protein 1                             | Camsap1            | -1.2  | 0.039 | -1.24 | 0.224 | 1.01  | 0.950 | 1.04  | 0.810 | -1.09 | 0.384 |
| 1427349_x_at | RIKEN cDNA 2810021G02 gene                                                     | 2810021G02Rik      | -1.2  | 0.029 | 1.12  | 0.292 | 1.04  | 0.960 | -1.15 | 0.143 | 1.13  | 0.506 |
| 1429661_at   | Rho-related BTB domain containing 3                                            | Rhobtb3            | -1.21 | 0.010 | -1.43 | 0.042 | -1.06 | 0.584 | -1.06 | 0.082 | -1.03 | 0.769 |
| 1452056_s_at | protein phosphatase 3, catalytic subunit, alpha isoform                        | Ppp3ca             | -1.21 | 0.023 | -2.15 | 0.008 | -1.25 | 0.127 | -1.46 | 0.006 | -1.37 | 0.001 |
| 1441617_at   | positive cofactor 2, multiprotein complex, glutamine/Q-rich-associated protein | Pcqap              | -1.21 | 0.032 | -1.23 | 0.007 | -1.04 | 0.501 | 1.03  | 0.913 | -1.35 | 0.071 |

|              |                                                                               |                         |       |       |       |       |       |       |       |       |       |       |
|--------------|-------------------------------------------------------------------------------|-------------------------|-------|-------|-------|-------|-------|-------|-------|-------|-------|-------|
| 1446087_at   | Golgi autoantigen, golgin subfamily a, 1                                      | Golga1                  | -1.21 | 0.042 | -1.37 | 0.058 | -2.81 | 0.116 | 2.14  | 0.738 | 4.01  | 0.087 |
| 1437547_s_at | DnaJ (Hsp40) homolog, subfamily C, member 14                                  | Dnajc14                 | -1.21 | 0.028 | 1.08  | 0.339 | -1.06 | 0.535 | -1.05 | 0.003 | 1.12  | 0.131 |
| 1448761_a_at | coatamer protein complex, subunit gamma 2                                     | Copg2                   | -1.21 | 0.012 | -1.13 | 0.009 | 1.03  | 0.919 | 1.54  | 0.163 | -1.16 | 0.320 |
| 1425812_a_at | calcium channel, voltage-dependent, N type, alpha 1B subunit                  | Cacna1b                 | -1.21 | 0.032 | -1.08 | 0.642 | 1.06  | 0.953 | 1.32  | 0.099 | 1.01  | 0.858 |
| 1452704_at   | RIKEN cDNA 1200015F23 gene                                                    | 1200015F23Rik           | -1.21 | 0.005 | -1.04 | 0.388 | 1.12  | 0.588 | 1.03  | 0.671 | 1.12  | 0.008 |
| 1425747_at   | RIKEN cDNA 1110060D06 gene /// dedicator of cytokinesis 5                     | 1110060D06Rik /// Dock  | -1.21 | 0.015 | -1.53 | 0.002 | -1.48 | 0.065 | -1.52 | 0.003 | -1.75 | 0.001 |
| 1452256_at   | RIKEN cDNA 1110002N22 gene                                                    | 1110002N22Rik           | -1.21 | 0.044 | 1.04  | 0.832 | 1.16  | 0.154 | 1.16  | 0.264 | 1.18  | 0.205 |
| 1417542_at   | ribosomal protein S6 kinase, polypeptide 2                                    | Rps6ka2                 | -1.22 | 0.011 | -1.66 | 0.014 | -1.05 | 0.435 | -1.09 | 0.009 | -1.22 | 0.048 |
| 1443299_at   | PDZ and LIM domain 3                                                          | Pdlim3                  | -1.22 | 0.022 | -1.29 | 0.083 | 1.06  | 0.920 | -1.03 | 0.983 | 1.05  | 0.833 |
| 1445475_at   | p21 (CDKN1A)-activated kinase 6                                               | Pak6                    | -1.22 | 0.018 | 1.12  | 0.625 | 1.28  | 0.798 | 1.23  | 0.786 | -1.35 | 0.053 |
| 1456495_s_at | oxysterol binding protein-like 6                                              | Osbpl6                  | -1.22 | 0.036 | -2.72 | 0.017 | 1.15  | 0.868 | 1.03  | 0.681 | 1.29  | 0.652 |
| 1425784_a_at | olfactomedin 1                                                                | Olfm1                   | -1.22 | 0.025 | -1.18 | 0.259 | 1.19  | 0.287 | -1.03 | 0.527 | 1.24  | 0.047 |
| 1434418_at   | longevity assurance homolog 6 (S. cerevisiae)                                 | Lass6                   | -1.22 | 0.024 | -2.06 | 0.010 | -1.58 | 0.020 | -1.66 | 0.006 | -1.87 | 0.015 |
| 1451382_at   | ChaC, cation transport regulator-like 1 (E. coli)                             | Chac1                   | -1.22 | 0.007 | -2.44 | 0.001 | -1.18 | 0.052 | -1.24 | 0.002 | -1.32 | 0.001 |
| 1441238_at   | RIKEN cDNA 9030416H16 gene                                                    | 9030416H16Rik           | -1.22 | 0.039 | 1.1   | 0.928 | 1.25  | 0.387 | 1.12  | 0.134 | 1.27  | 0.774 |
| 1427187_at   | RIKEN cDNA 6030413G23 gene                                                    | 6030413G23Rik           | -1.22 | 0.040 | -1.52 | 0.042 | 1.03  | 0.879 | 1.1   | 0.479 | 1.82  | 0.032 |
| 1440318_at   | WD repeat domain 35                                                           | Wdr35                   | -1.23 | 0.006 | -1.08 | 0.419 | 1.35  | 0.519 | 1.04  | 0.913 | 1.16  | 0.481 |
| 1456488_at   | WD repeat domain 33                                                           | Wdr33                   | -1.23 | 0.019 | -1.02 | 0.693 | -1.25 | 0.292 | -1.14 | 0.031 | -1.34 | 0.071 |
| 1427894_at   | vasorin                                                                       | Vasn                    | -1.23 | 0.033 | -1.29 | 0.091 | -1.19 | 0.031 | -1.1  | 0.118 | -1.33 | 0.034 |
| 1436542_at   | Prostaglandin E receptor 1 (subtype EP1)                                      | Ptger1                  | -1.23 | 0.035 | -1.03 | 0.853 | 1.02  | 0.927 | 1.1   | 0.282 | -1    | 0.925 |
| 1435432_at   | centaurin, gamma 2                                                            | Centg2                  | -1.23 | 0.014 | -2.53 | 0.001 | -1.91 | 0.009 | -1.57 | 0.005 | -1.97 | 0.018 |
| 1426249_at   | adrenergic receptor kinase, beta 1                                            | Adrbk1                  | -1.23 | 0.030 | -1.02 | 0.813 | 1.02  | 0.833 | -1.03 | 0.049 | 1.06  | 0.348 |
| 1443005_at   | zinc finger homeobox 1a                                                       | Zfx1a                   | -1.24 | 0.029 | -1.51 | 0.031 | -1.29 | 0.041 | -1.33 | 0.117 | 1.04  | 0.912 |
| 1454741_s_at | transmembrane protein 164                                                     | Tmem164                 | -1.24 | 0.029 | -1.56 | 0.001 | -1.06 | 0.263 | -1.15 | 0.032 | -1.22 | 0.039 |
| 1420696_at   | sema domain, immunoglobulin domain (Ig), short basic domain, secret           | Sema3c                  | -1.24 | 0.048 | -1.05 | 0.701 | -1.38 | 0.196 | 1.01  | 0.893 | -1.17 | 0.247 |
| 1418895_at   | src family associated phosphoprotein 2                                        | Scap2                   | -1.24 | 0.042 | -1.74 | 0.022 | 1.09  | 0.727 | -1.11 | 0.114 | -1.1  | 0.290 |
| 1418869_a_at | pseudouridine synthase 1                                                      | Pus1                    | -1.24 | 0.042 | 1.1   | 0.471 | 1.19  | 0.033 | 1.25  | 0.140 | 1.15  | 0.233 |
| 1427288_at   | amyloid beta (A4) precursor protein-binding, family A, member 2               | Apba2                   | -1.24 | 0.017 | -1.16 | 0.316 | 1.05  | 0.737 | -1.25 | 0.378 | 1.07  | 0.848 |
| 1460222_at   | SH3-domain binding protein 1                                                  | Sh3bp1                  | -1.25 | 0.024 | 1.05  | 0.972 | -1.11 | 0.316 | -1.05 | 0.566 | 1.26  | 0.075 |
| 1436784_x_at | splicing factor 3b, subunit 4 /// similar to splicing factor 3b, subunit 4 (p | Sf3b4 /// LOC634414 /// | -1.25 | 0.042 | -1.02 | 0.627 | 1.05  | 0.841 | 1.04  | 0.938 | 1.2   | 0.080 |
| 1417255_at   | intraflagellar transport 140 homolog (Chlamydomonas)                          | Ift140                  | -1.25 | 0.042 | -1.3  | 0.247 | -1.01 | 0.871 | -1.03 | 0.568 | -1.1  | 0.435 |
| 1423966_at   | Cd99 antigen-like 2                                                           | Cd99l2                  | -1.25 | 0.003 | -1.41 | 0.010 | -1.1  | 0.541 | 1.03  | 0.844 | -1.17 | 0.065 |
| 1436503_at   | cDNA sequence BC048546                                                        | BC048546                | -1.25 | 0.021 | 2.06  | 0.426 | 1.33  | 0.247 | -1.27 | 0.271 | 1     | 0.595 |
| 1457900_at   | activating signal cointegrator 1 complex subunit 3                            | Ascc3                   | -1.25 | 0.050 | -1.13 | 0.369 | -1.14 | 0.406 | 1.11  | 0.552 | 1.5   | 0.234 |
| 1437466_at   | activated leukocyte cell adhesion molecule                                    | Alcam                   | -1.25 | 0.019 | -1.44 | 0.216 | -1.1  | 0.691 | 1.03  | 0.441 | -1.12 | 0.342 |
| 1426937_at   | RIKEN cDNA 6330406I15 gene                                                    | 6330406I15Rik           | -1.25 | 0.008 | -1.51 | 0.148 | -1.29 | 0.140 | -1.48 | 0.031 | -1.33 | 0.025 |
| 1452727_at   | R3H domain containing 2                                                       | R3hdm2                  | -1.26 | 0.044 | -1.37 | 0.008 | -1.06 | 0.456 | -1.11 | 0.225 | -1.2  | 0.156 |
| 1449785_at   | expressed sequence AA414993                                                   | AA414993                | -1.26 | 0.048 | -1.56 | 0.125 | 1.53  | 0.905 | 1.41  | 0.401 | 1.8   | 0.341 |
| 1441850_x_at | transcobalamin 2                                                              | Tcn2                    | -1.27 | 0.037 | 1.13  | 0.563 | 1.09  | 0.954 | 1.14  | 0.733 | 1.13  | 0.561 |
| 1443238_at   | PHD finger protein 14                                                         | Phf14                   | -1.27 | 0.045 | -1.22 | 0.097 | -1.07 | 0.625 | 1.16  | 0.850 | -1.09 | 0.458 |
| 1452320_at   | low density lipoprotein receptor-related protein 2                            | Lrp2                    | -1.27 | 0.022 | -1.36 | 0.144 | -1.41 | 0.027 | -1.31 | 0.000 | -1.13 | 0.148 |

|              |                                                                                                      |               |       |       |       |       |       |       |       |       |       |       |
|--------------|------------------------------------------------------------------------------------------------------|---------------|-------|-------|-------|-------|-------|-------|-------|-------|-------|-------|
| 1452844_at   | POU domain, class 6, transcription factor 1                                                          | Pou6f1        | -1.28 | 0.010 | -1.09 | 0.491 | 1.11  | 0.562 | 1.16  | 0.027 | 1.1   | 0.297 |
| 1438551_at   | neurogenin 1                                                                                         | Neurog1       | -1.28 | 0.006 | 1.27  | 0.256 | -1.16 | 0.090 | 1.27  | 0.269 | -1.07 | 0.616 |
| 1436143_at   | RIKEN cDNA 4933425L03 gene                                                                           | 4933425L03Rik | -1.28 | 0.050 | -1.93 | 0.063 | -1.57 | 0.004 | -1.42 | 0.024 | -1.67 | 0.025 |
| 1421929_at   | Eph receptor A4                                                                                      | Epha4         | -1.29 | 0.021 | -1.25 | 0.028 | -1.65 | 0.142 | -1.33 | 0.019 | -1.33 | 0.166 |
| 1429987_at   | RIKEN cDNA 9930013L23 gene                                                                           | 9930013L23Rik | -1.29 | 0.007 | -3.17 | 0.004 | -2.03 | 0.006 | -1.74 | 0.000 | -2.44 | 0.008 |
| 1452418_at   | RIKEN cDNA 1200016E24 gene                                                                           | 1200016E24Rik | -1.29 | 0.020 | 1.03  | 0.472 | -1.08 | 0.608 | 1.05  | 0.925 | 1.34  | 0.035 |
| 1443905_at   | Splicing factor, arginine/serine-rich 8                                                              | Sfrs8         | -1.3  | 0.010 | -1.12 | 0.438 | -1.11 | 0.090 | -1.26 | 0.030 | -1.15 | 0.317 |
| 1444379_at   | PWWP domain containing 2                                                                             | Pwwp2         | -1.3  | 0.014 | -1.49 | 0.104 | 1.28  | 0.215 | -1.28 | 0.116 | 1.16  | 0.429 |
| 1430180_at   | mitogen activated protein kinase kinase 5                                                            | Map2k5        | -1.3  | 0.040 | -1.41 | 0.196 | -1.03 | 0.657 | -1.13 | 0.312 | -1.45 | 0.077 |
| 1441200_at   | Kruppel-like factor 3 (basic)                                                                        | Klf3          | -1.3  | 0.047 | 1.01  | 0.772 | -1.12 | 0.393 | -1.22 | 0.183 | -1.01 | 0.778 |
| 1420364_at   | G protein-coupled receptor 87                                                                        | Gpr87         | -1.3  | 0.011 | -1.02 | 0.783 | -1.19 | 0.329 | -1.26 | 0.347 | 1.05  | 0.826 |
| 1434158_at   | GDP-mannose 4, 6-dehydratase                                                                         | Gmds          | -1.3  | 0.036 | -1.34 | 0.039 | -1.4  | 0.009 | -1.13 | 0.033 | -1.3  | 0.012 |
| 1438367_x_at | discoidin domain receptor family, member 1                                                           | Ddr1          | -1.3  | 0.006 | -1.19 | 0.473 | 1.75  | 0.111 | -1.45 | 0.101 | 1.19  | 0.967 |
| 1436293_x_at | DNA segment, Chr 1, ERATO Doi 471, expressed                                                         | D1Ert471e     | -1.3  | 0.050 | -1.13 | 0.404 | 1.42  | 0.321 | -1.07 | 0.286 | 1.06  | 0.891 |
| 1429927_at   | RIKEN cDNA 5830409B07 gene                                                                           | 5830409B07Rik | -1.3  | 0.044 | -2.19 | 0.063 | -1.13 | 0.444 | 1.5   | 0.032 | 1.21  | 0.408 |
| 1437246_x_at | ribosomal protein S6 /// similar to 40S ribosomal protein S6 /// similar to Rps6 /// LOC214738 /// L | Rps6          | -1.31 | 0.044 | -1.06 | 0.527 | 1.17  | 0.162 | -1.31 | 0.046 | 1.14  | 0.200 |
| 1431751_a_at | metallophosphoesterase domain containing 2                                                           | Mpped2        | -1.31 | 0.013 | -2.13 | 0.034 | -1.39 | 0.141 | 1.2   | 0.467 | -1.11 | 0.499 |
| 1459667_at   | Rho GTPase activating protein 17                                                                     | Arhgap17      | -1.31 | 0.042 | -1.43 | 0.128 | 1.03  | 0.812 | 1.11  | 0.535 | -1.11 | 0.392 |
| 1431194_at   | RIKEN cDNA 6030468B19 gene                                                                           | 6030468B19Rik | -1.31 | 0.006 | -1.17 | 0.402 | 1.08  | 0.790 | 1.13  | 0.567 | 1.03  | 0.847 |
| 1443916_at   | RIKEN cDNA 2900026A02 gene                                                                           | 2900026A02Rik | -1.31 | 0.007 | -2.11 | 0.000 | -1.07 | 0.428 | -1.05 | 0.602 | -1.52 | 0.015 |
| 1428439_at   | negative regulator of ubiquitin-like proteins 1                                                      | Nub1          | -1.32 | 0.011 | -1.32 | 0.325 | 1.83  | 0.394 | 1.19  | 0.865 | -1.07 | 0.635 |
| 1441928_x_at | elongation factor RNA polymerase II                                                                  | Eif1          | -1.32 | 0.045 | -1.04 | 0.928 | 1.45  | 0.929 | -1.22 | 0.200 | -1.08 | 0.656 |
| 1443889_at   | RIKEN cDNA 9030619P08 gene                                                                           | 9030619P08Rik | -1.32 | 0.031 | -1.18 | 0.421 | 1.01  | 0.759 | 2     | 0.268 | 1.89  | 0.213 |
| 1444059_at   | RIKEN cDNA 6330415G19 gene                                                                           | 6330415G19Rik | -1.32 | 0.045 | -1.37 | 0.095 | 1.32  | 0.116 | 1.24  | 0.497 | -1.26 | 0.142 |
| 1454274_at   | RIKEN cDNA 4930571C24 gene                                                                           | 4930571C24Rik | -1.32 | 0.022 | -1.13 | 0.520 | 1.25  | 0.326 | -1.07 | 0.362 | -1.05 | 0.645 |
| 1440369_at   | Prostaglandin E receptor 3 (subtype EP3)                                                             | Ptger3        | -1.33 | 0.023 | 1.39  | 0.325 | -1.21 | 0.301 | -1.1  | 0.237 | -1.17 | 0.092 |
| 1436311_at   | gem (nuclear organelle) associated protein 5                                                         | Gemin5        | -1.33 | 0.018 | 1.23  | 0.269 | 1.13  | 0.620 | 1.1   | 0.294 | -1.06 | 0.984 |
| 1457042_at   | EST AI256396                                                                                         | AI256396      | -1.33 | 0.048 | -1.47 | 0.094 | 1.03  | 0.927 | 1.16  | 0.894 | 1.13  | 0.574 |
| 1432861_at   | RIKEN cDNA 2900046F13 gene                                                                           | 2900046F13Rik | -1.33 | 0.047 | -1.09 | 0.519 | 1.67  | 0.038 | 1.74  | 0.362 | -1.15 | 0.365 |
| 1429652_at   | RIKEN cDNA 1190002C06 gene                                                                           | 1190002C06Rik | -1.33 | 0.047 | -1.71 | 0.042 | -1.09 | 0.416 | 1.05  | 0.666 | -1.1  | 0.441 |
| 1427596_at   | X (inactive)-specific transcript, antisense                                                          | Tsix          | -1.34 | 0.049 | 1.48  | 0.760 | -2.64 | 0.009 | 1.34  | 0.891 | 1.47  | 0.175 |
| 1435603_at   | sushi, nidogen and EGF-like domains 1                                                                | Sned1         | -1.34 | 0.008 | -1.12 | 0.681 | -1.28 | 0.345 | -1.02 | 0.749 | -1.13 | 0.385 |
| 1421672_at   | interleukin 17A                                                                                      | Il17a         | -1.34 | 0.036 | -1.72 | 0.045 | 1.51  | 0.425 | 1.48  | 0.884 | 1.35  | 0.262 |
| 1442186_at   | ataxin 7                                                                                             | Atxn7         | -1.34 | 0.020 | -1.03 | 0.515 | 1.22  | 0.548 | -1.11 | 0.317 | -1.41 | 0.066 |
| 1421563_at   | ATPase, Cu++ transporting, beta polypeptide                                                          | Atp7b         | -1.34 | 0.037 | 1.02  | 0.873 | 1.14  | 0.218 | 1.02  | 0.747 | 1.37  | 0.095 |
| 1453152_at   | MAM domain containing 2                                                                              | Mamdc2        | -1.35 | 0.014 | -1.32 | 0.236 | -1.14 | 0.386 | 1.06  | 0.591 | 1.52  | 0.776 |
| 1422678_at   | diacylglycerol O-acyltransferase 2                                                                   | Dgat2         | -1.35 | 0.049 | -1.07 | 0.486 | 1.11  | 0.355 | 1.1   | 0.107 | 1.15  | 0.433 |
| 1442868_at   | RIKEN cDNA C130026L21 gene                                                                           | C130026L21Rik | -1.35 | 0.015 | 1.51  | 0.600 | -1.34 | 0.210 | 1.22  | 0.486 | -1.01 | 0.743 |
| 1455341_at   | RIKEN cDNA 2010003J03 gene                                                                           | 2010003J03Rik | -1.35 | 0.032 | -1.09 | 0.556 | 1.05  | 0.770 | 1.25  | 0.268 | -1.24 | 0.128 |
| 1421245_at   | sclerostin                                                                                           | Sost          | -1.36 | 0.030 | -1.19 | 0.168 | 1.05  | 0.572 | 1.08  | 0.855 | 1.02  | 0.754 |
| 1428661_at   | nuclear factor of kappa light polypeptide gene enhancer in B-cells inhib Nfkbil2                     | Nfkbil2       | -1.36 | 0.003 | 1.12  | 0.293 | -1.04 | 0.572 | 1.15  | 0.369 | 1.32  | 0.027 |

|              |                                                                     |               |       |       |       |       |       |       |       |       |       |       |
|--------------|---------------------------------------------------------------------|---------------|-------|-------|-------|-------|-------|-------|-------|-------|-------|-------|
| 1434994_at   | death effector domain-containing                                    | Dedd          | -1.36 | 0.040 | -1.04 | 0.591 | 1.11  | 0.425 | 1.1   | 0.283 | 1.13  | 0.196 |
| 1447083_at   | RIKEN cDNA 4933407I05 gene                                          | 4933407I05Rik | -1.36 | 0.014 | -2.21 | 0.006 | 1.34  | 0.895 | 1.86  | 0.223 | 1.59  | 0.448 |
| 1440779_s_at | solute carrier family 5 (sodium/glucose cotransporter), member 9    | Slc5a9        | -1.37 | 0.031 | -1.04 | 0.611 | -1.03 | 0.694 | -1.08 | 0.640 | 1.85  | 0.086 |
| 1422548_at   | dehydrodolichyl diphosphate synthase                                | Dhdds         | -1.37 | 0.003 | -1.16 | 0.257 | 1.09  | 0.979 | 1.03  | 0.524 | 1.22  | 0.643 |
| 1429097_at   | RIKEN cDNA C030044C12 gene                                          | C030044C12Rik | -1.37 | 0.047 | -2.1  | 0.001 | -1.07 | 0.655 | -1.28 | 0.175 | -1.24 | 0.196 |
| 1432832_at   | RIKEN cDNA 4933435G04 gene                                          | 4933435G04Rik | -1.37 | 0.020 | -1.29 | 0.255 | 1.45  | 0.983 | 1.89  | 0.354 | 1.12  | 0.612 |
| 1431712_a_at | RIKEN cDNA 2310022A10 gene                                          | 2310022A10Rik | -1.37 | 0.037 | 1.18  | 0.082 | 1.09  | 0.937 | 1.13  | 0.224 | 1.45  | 0.109 |
| 1419521_at   | zinc finger protein 94                                              | Zfp94         | -1.38 | 0.030 | -1.18 | 0.219 | -1.09 | 0.513 | 1.25  | 0.246 | -1    | 0.999 |
| 1437012_x_at | Rap guanine nucleotide exchange factor (GEF) 3                      | Rapgef3       | -1.38 | 0.049 | -1.35 | 0.115 | 1.71  | 0.045 | 1.64  | 0.177 | 1.67  | 0.304 |
| 1437982_x_at | COX15 homolog, cytochrome c oxidase assembly protein (yeast)        | Cox15         | -1.38 | 0.023 | -1.16 | 0.285 | 1.22  | 0.821 | -1.09 | 0.216 | 1.33  | 0.125 |
| 1456380_x_at | calponin 3, acidic                                                  | Cnn3          | -1.38 | 0.026 | 1.02  | 0.545 | -1.01 | 0.840 | -1.07 | 0.508 | 1.1   | 0.903 |
| 1443497_at   | Ankyrin repeat and BTB (POZ) domain containing 2                    | Abtb2         | -1.38 | 0.027 | -1.06 | 0.895 | 1.5   | 0.772 | 1.32  | 0.443 | 3.96  | 0.004 |
| 1443870_at   | ATP-binding cassette, sub-family C (CFTR/MRP), member 4             | Abcc4         | -1.38 | 0.031 | -2.43 | 0.034 | -1.39 | 0.004 | -1.25 | 0.012 | -1.34 | 0.049 |
| 1438033_at   | thyrotroph embryonic factor                                         | Tef           | -1.39 | 0.046 | 1.15  | 0.751 | -1.05 | 0.584 | 1.01  | 0.904 | 1.02  | 0.762 |
| 1444276_at   | immature colon carcinoma transcript 1                               | Ict1          | -1.39 | 0.002 | -1.7  | 0.005 | -1.35 | 0.182 | -1.16 | 0.428 | 1.14  | 0.423 |
| 1440840_at   | RIKEN cDNA D630004K10 gene                                          | D630004K10Rik | -1.39 | 0.004 | -1.77 | 0.052 | -1.1  | 0.611 | -1.13 | 0.421 | -1.11 | 0.389 |
| 1442504_at   | DNA segment, Chr 18, ERATO Doi 653, expressed                       | D18Ert653e    | -1.39 | 0.037 | -1.74 | 0.053 | -1.22 | 0.255 | -1.3  | 0.044 | -1.01 | 0.566 |
| 1455851_at   | bone morphogenetic protein 5                                        | Bmp5          | -1.39 | 0.021 | 1.04  | 0.957 | 1.51  | 0.167 | 1.86  | 0.875 | 1.15  | 0.563 |
| 1452928_at   | ABI gene family, member 3                                           | Abi3          | -1.39 | 0.038 | -1.14 | 0.561 | -1.19 | 0.266 | 1.56  | 0.101 | -1.22 | 0.419 |
| 1429543_at   | RIKEN cDNA 6230424C14 gene                                          | 6230424C14Rik | -1.39 | 0.010 | -1.6  | 0.154 | -1.06 | 0.407 | -1.39 | 0.123 | -1.22 | 0.281 |
| 1432313_at   | RIKEN cDNA 4933433F19 gene                                          | 4933433F19Rik | -1.39 | 0.023 | 1.14  | 0.906 | -1.09 | 0.387 | -1.02 | 0.702 | 1.57  | 0.335 |
| 1419032_at   | RIKEN cDNA 2610018G03 gene                                          | 2610018G03Rik | -1.39 | 0.007 | -1.29 | 0.477 | 1.04  | 0.941 | 1.21  | 0.824 | 2.42  | 0.202 |
| 1455933_at   | transformer 2 alpha homolog (Drosophila)                            | Tra2a         | -1.4  | 0.029 | -1.09 | 0.582 | 1.2   | 0.604 | 1.1   | 0.981 | 1.31  | 0.566 |
| 1459612_at   | PH domain and leucine rich repeat protein phosphatase               | Phlpp         | -1.4  | 0.040 | 1.66  | 0.618 | 1.67  | 0.335 | 1.39  | 0.715 | -1.11 | 0.367 |
| 1431844_at   | potassium large conductance calcium-activated channel, subfamily M, | Kcnmb2        | -1.4  | 0.025 | 1.03  | 0.845 | 4.12  | 0.152 | 1.01  | 0.936 | 1.03  | 0.924 |
| 1424856_at   | ATPase, Na+/K+ transporting, alpha 3 polypeptide                    | Atp1a3        | -1.4  | 0.006 | -1.11 | 0.632 | 1.69  | 0.954 | -1.16 | 0.741 | 1.21  | 0.679 |
| 1432570_at   | RIKEN cDNA 6030458E02 gene                                          | 6030458E02Rik | -1.4  | 0.000 | -1.56 | 0.013 | -1.26 | 0.178 | -1.06 | 0.521 | 1.1   | 0.986 |
| 1456906_at   | RIKEN cDNA 4833432P19 gene                                          | 4833432P19Rik | -1.4  | 0.031 | -1.17 | 0.226 | 1.25  | 0.267 | 1.16  | 0.448 | -1.45 | 0.016 |
| 1449639_at   | RIKEN cDNA 0610040J01 gene                                          | 0610040J01Rik | -1.4  | 0.041 | -1.1  | 0.902 | -1.29 | 0.238 | -1.01 | 0.595 | 2.01  | 0.387 |
| 1458897_at   | uronyl-2-sulfotransferase                                           | Ust           | -1.41 | 0.010 | -2.9  | 0.007 | -1.2  | 0.102 | -1.41 | 0.087 | -1.25 | 0.086 |
| 1427043_s_at | cytosolic ovarian carcinoma antigen 1                               | Cova1         | -1.41 | 0.049 | -2.99 | 0.005 | -1.37 | 0.065 | -1.69 | 0.008 | -1.63 | 0.041 |
| 1422872_at   | bone morphogenetic protein receptor, type 1B                        | Bmpr1b        | -1.41 | 0.020 | -1.71 | 0.089 | -1.46 | 0.103 | -1.65 | 0.092 | 1.23  | 0.516 |
| 1451407_at   | junction adhesion molecule 4                                        | Jam4          | -1.42 | 0.038 | -1.01 | 0.823 | 1.18  | 0.679 | 1.25  | 0.767 | 1.2   | 0.389 |
| 1441335_at   | RIKEN cDNA 4930474N05 gene                                          | 4930474N05Rik | -1.42 | 0.010 | 1.16  | 0.997 | 1.3   | 0.234 | -1.04 | 0.807 | 1.22  | 0.661 |
| 1449910_at   | RIKEN cDNA 2210418O10 gene                                          | 2210418O10Rik | -1.42 | 0.016 | 1.15  | 0.461 | 1.06  | 0.934 | 1.11  | 0.473 | 1.02  | 0.790 |
| 1416997_a_at | huntingtin-associated protein 1                                     | Hap1          | -1.43 | 0.014 | -1.05 | 0.675 | 1.32  | 0.557 | -1.1  | 0.145 | 1.06  | 0.459 |
| 1428771_at   | RIKEN cDNA 2410127E18 gene                                          | 2410127E18Rik | -1.43 | 0.036 | -1.17 | 0.209 | -1.26 | 0.066 | 1.06  | 0.655 | -1.07 | 0.568 |
| 1457074_at   | kinesin family member 24                                            | Kif24         | -1.44 | 0.029 | -1.29 | 0.379 | 1.57  | 0.883 | 1.06  | 0.948 | -1.24 | 0.312 |
| 1418668_at   | acyl-CoA synthetase medium-chain family member 1                    | Acsm1         | -1.44 | 0.031 | -1.38 | 0.347 | 1.14  | 0.782 | -1.37 | 0.217 | -1.26 | 0.468 |
| 1439124_at   | RIKEN cDNA 9530020G05 gene                                          | 9530020G05Rik | -1.44 | 0.023 | -1.51 | 0.026 | -1.48 | 0.118 | 1.12  | 0.660 | 1.38  | 0.231 |
| 1428284_at   | RIKEN cDNA 8430427H17 gene                                          | 8430427H17Rik | -1.44 | 0.033 | -1.22 | 0.121 | -1.01 | 0.620 | -1.08 | 0.492 | -1.16 | 0.169 |



|              |                                                                          |                        |       |       |       |       |       |       |       |       |       |       |
|--------------|--------------------------------------------------------------------------|------------------------|-------|-------|-------|-------|-------|-------|-------|-------|-------|-------|
| 1455562_at   | SRY-box containing gene 12                                               | Sox12                  | -1.45 | 0.017 | -1.17 | 0.147 | 1.07  | 0.488 | -1.41 | 0.087 | -1.09 | 0.136 |
| 1433930_at   | Heparanase                                                               | Hpse                   | -1.45 | 0.045 | -1.65 | 0.041 | -1.54 | 0.157 | 2.33  | 0.506 | 2.9   | 0.101 |
| 1418508_a_at | growth factor receptor bound protein 2                                   | Grb2                   | -1.45 | 0.044 | -1.28 | 0.019 | 1.17  | 0.510 | -1.3  | 0.026 | 1.12  | 0.447 |
| 1457020_at   | GC-rich promoter binding protein 1-like 1                                | Gpbp111                | -1.45 | 0.007 | -1.41 | 0.243 | 2.7   | 0.173 | 1.05  | 0.682 | 1.74  | 0.067 |
| 1448744_at   | galactosamine (N-acetyl)-6-sulfate sulfatase                             | Gains                  | -1.45 | 0.024 | -1.42 | 0.084 | 1.12  | 0.160 | 1.04  | 0.315 | 1.09  | 0.353 |
| 1421280_at   | gamma-aminobutyric acid (GABA-A) receptor, subunit alpha 1               | Gabra1                 | -1.45 | 0.037 | 1.65  | 0.813 | 1.66  | 0.247 | 3.74  | 0.007 | -1.16 | 0.395 |
| 1415994_at   | cytochrome P450, family 2, subfamily e, polypeptide 1                    | Cyp2e1                 | -1.45 | 0.006 | 1.35  | 0.482 | -1.46 | 0.116 | -1.2  | 0.384 | -1.32 | 0.182 |
| 1459054_at   | cDNA sequence BC035954                                                   | BC035954               | -1.45 | 0.034 | -1.17 | 0.430 | 1.2   | 0.726 | 1     | 0.918 | 1.17  | 0.311 |
| 1460099_at   | ATPas, class II, type 9B                                                 | Atp9b                  | -1.45 | 0.021 | 1.04  | 0.903 | 1.27  | 0.682 | 1.53  | 0.799 | -1.28 | 0.272 |
| 1451116_at   | acetoacetyl-CoA synthetase                                               | Aacs                   | -1.45 | 0.028 | -1.87 | 0.024 | 1.37  | 0.459 | 1.02  | 0.749 | 1.21  | 0.579 |
| 1431965_at   | RIKEN cDNA 4933411E08 gene                                               | 4933411E08Rik          | -1.45 | 0.003 | -1.06 | 0.450 | -1.31 | 0.195 | -1.21 | 0.398 | 1.17  | 0.419 |
| 1438302_at   | HCF-binding transcription factor Zhangfei                                | Zf                     | -1.46 | 0.012 | -1.17 | 0.298 | -1.07 | 0.580 | 1.01  | 0.967 | 1.63  | 0.652 |
| 1417362_at   | Rhesus blood group-associated C glycoprotein                             | Rhcg                   | -1.46 | 0.015 | 1.46  | 0.267 | 1.32  | 0.560 | 1.11  | 0.767 | 1.34  | 0.413 |
| 1419498_at   | transmembrane and immunoglobulin domain containing 1                     | Tmigd1                 | -1.47 | 0.034 | -1.29 | 0.319 | -1.16 | 0.111 | -1.72 | 0.097 | 1.52  | 0.862 |
| 1420353_at   | lymphotoxin A                                                            | Lta                    | -1.47 | 0.005 | -1.63 | 0.035 | 1.05  | 0.931 | -1.03 | 0.749 | 1.11  | 0.884 |
| 1448437_a_at | GTP binding protein 2                                                    | Gtpbp2                 | -1.47 | 0.036 | -1.73 | 0.049 | -1.27 | 0.328 | 2.04  | 0.092 | 1.03  | 0.485 |
| 1425101_a_at | FK506 binding protein 6                                                  | Fkbp6                  | -1.47 | 0.020 | 1.02  | 0.875 | -1.21 | 0.091 | -1    | 0.748 | 2.89  | 0.424 |
| 1419715_at   | RIKEN cDNA 1700029F12 gene                                               | 1700029F12Rik          | -1.47 | 0.042 | 1.12  | 0.508 | -1.22 | 0.308 | -1.44 | 0.341 | 1.14  | 0.576 |
| 1423515_at   | sodium channel, voltage-gated, type VIII, alpha                          | Scn8a                  | -1.48 | 0.021 | 1.25  | 0.747 | -1.01 | 0.420 | 1.51  | 0.519 | 1.98  | 0.788 |
| 1459485_at   | Neogenin                                                                 | Neo1                   | -1.48 | 0.040 | -1    | 0.968 | 1.02  | 0.867 | 1.41  | 0.986 | 1.11  | 0.764 |
| 1449999_a_at | calcium channel, voltage-dependent, alpha2/delta subunit 1               | Cacna2d1               | -1.48 | 0.015 | -2.16 | 0.018 | -1.13 | 0.553 | 1     | 0.916 | -1.3  | 0.076 |
| 1432293_at   | RIKEN cDNA 4930579G18 gene                                               | 4930579G18Rik          | -1.48 | 0.050 | 1.09  | 0.916 | 1.27  | 0.283 | 1.56  | 0.347 | 1.16  | 0.696 |
| 1428955_x_at | solute carrier family 9 (sodium/hydrogen exchanger), isoform 3 regulator | Slc9a3r2               | -1.49 | 0.035 | -1.29 | 0.222 | 1.85  | 0.366 | 1.06  | 0.956 | 1.41  | 0.261 |
| 1423278_at   | protein tyrosine phosphatase, receptor type, K                           | Ptprk                  | -1.49 | 0.031 | -2.67 | 0.015 | -2.26 | 0.030 | -2.01 | 0.007 | -2.16 | 0.014 |
| 1442680_at   | Neural cell adhesion molecule 1                                          | Ncam1                  | -1.49 | 0.018 | -1.61 | 0.114 | -1.41 | 0.049 | -1.97 | 0.043 | -1.62 | 0.158 |
| 1444152_at   | CUG triplet repeat, RNA binding protein 2                                | Cugbp2                 | -1.49 | 0.015 | -1.88 | 0.080 | 2.82  | 0.473 | -1.23 | 0.294 | 1.21  | 0.995 |
| 1427016_at   | RIKEN cDNA 4932438A13 gene /// similar to CG4841-PA                      | 4932438A13Rik /// LOC6 | -1.49 | 0.016 | -1.91 | 0.029 | -1.19 | 0.136 | -1.22 | 0.270 | -1.63 | 0.031 |
| 1417717_a_at | tyrosinase                                                               | Tyr                    | -1.5  | 0.012 | -1.14 | 0.365 | 1.17  | 0.740 | 1.02  | 0.964 | 1.38  | 0.047 |
| 1456353_at   | suppressor of Ty 4 homolog 1 (S. cerevisiae)                             | Supt4h1                | -1.5  | 0.026 | -1.35 | 0.327 | 1.52  | 0.319 | 1.53  | 0.062 | 1.72  | 0.193 |
| 1455030_at   | protein tyrosine phosphatase, receptor type, J                           | Ptprj                  | -1.5  | 0.018 | -2.07 | 0.027 | -1.36 | 0.207 | -1.54 | 0.024 | -1.88 | 0.004 |
| 1431724_a_at | purinergic receptor P2Y, G-protein coupled 12                            | P2ry12                 | -1.5  | 0.007 | -1.16 | 0.452 | -1.11 | 0.383 | -1.58 | 0.052 | -1.01 | 0.692 |
| 1442334_at   | PRAME family member LOC545693                                            | MGC118150              | -1.5  | 0.032 | 1.45  | 0.870 | -1.14 | 0.226 | -1.39 | 0.207 | 1.28  | 0.217 |
| 1458780_at   | DNA segment, Chr 8, ERATO Doi 620, expressed                             | D8Ert620e              | -1.5  | 0.006 | -1.04 | 0.660 | -1.55 | 0.201 | 3.35  | 0.051 | -1.09 | 0.489 |
| 1453793_at   | RIKEN cDNA 1700026J12 gene                                               | 1700026J12Rik          | -1.5  | 0.019 | 1.02  | 0.836 | -1.2  | 0.257 | -1.04 | 0.505 | 1.71  | 0.396 |
| 1432662_at   | RIKEN cDNA 0610042E11 gene                                               | 0610042E11Rik          | -1.5  | 0.016 | 1.23  | 0.804 | 1.31  | 0.699 | 2.08  | 0.257 | -1.21 | 0.550 |
| 1446536_at   | sema domain, transmembrane domain (TM), and cytoplasmic domain,          | Sema6d                 | -1.51 | 0.033 | 1.09  | 0.596 | -1.14 | 0.556 | 1.14  | 0.740 | -1.02 | 0.653 |
| 1437877_at   | coiled-coil domain containing 39 /// tetratricopeptide repeat domain 14  | Ccdc39 /// Ttc14       | -1.51 | 0.004 | -1.13 | 0.511 | 1.24  | 0.238 | 1.45  | 0.109 | 1.08  | 0.638 |
| 1436117_at   | RIKEN cDNA A830010M20 gene                                               | A830010M20Rik          | -1.51 | 0.049 | -1.15 | 0.516 | 1.23  | 0.510 | 1.16  | 0.373 | 1.42  | 0.369 |
| 1432688_at   | RIKEN cDNA 4631422I05 gene                                               | 4631422I05Rik          | -1.51 | 0.036 | 1.35  | 0.388 | 1.05  | 0.724 | 1.58  | 0.836 | 1.18  | 0.834 |
| 1447353_at   | G protein-coupled receptor 161                                           | Gpr161                 | -1.52 | 0.028 | -1.23 | 0.415 | 1.27  | 0.890 | 1.17  | 0.730 | 1.13  | 0.417 |
| 1437129_at   | RIKEN cDNA E330018D03 gene                                               | E330018D03Rik          | -1.52 | 0.039 | -1.4  | 0.126 | -1.19 | 0.170 | -1    | 0.745 | 1.03  | 0.956 |

|              |                                                                                    |                       |       |       |       |       |       |       |       |       |       |       |
|--------------|------------------------------------------------------------------------------------|-----------------------|-------|-------|-------|-------|-------|-------|-------|-------|-------|-------|
| 1419756_at   | diacylglycerol kinase, gamma                                                       | Dgkg                  | -1.52 | 0.046 | -1.06 | 0.530 | -1.12 | 0.361 | -1.07 | 0.419 | 1.01  | 0.654 |
| 1416772_at   | carnitine palmitoyltransferase 2                                                   | Cpt2                  | -1.52 | 0.019 | -1.49 | 0.008 | 1.2   | 0.491 | -1.12 | 0.245 | 1.33  | 0.519 |
| 1453417_at   | RIKEN cDNA 4933407K13 gene                                                         | 4933407K13Rik         | -1.52 | 0.026 | -1.15 | 0.089 | 1.92  | 0.004 | 1.41  | 0.376 | 1.46  | 0.633 |
| 1443303_at   | RIKEN cDNA 4930521E07 gene                                                         | 4930521E07Rik         | -1.52 | 0.014 | -1.22 | 0.338 | -1.18 | 0.344 | 1.13  | 0.700 | -1.25 | 0.143 |
| 1429524_at   | myosin IF                                                                          | Myo1f                 | -1.53 | 0.045 | -1.08 | 0.649 | 1.49  | 0.669 | 1.4   | 0.903 | -1.11 | 0.815 |
| 1418833_at   | alanine-glyoxylate aminotransferase                                                | Agxt                  | -1.53 | 0.033 | 1.05  | 0.912 | 1.46  | 0.906 | 1.25  | 0.511 | -1.05 | 0.467 |
| 1422856_at   | solute carrier family 12, member 3                                                 | Slc12a3               | -1.54 | 0.036 | -1.13 | 0.535 | 1.2   | 0.241 | -1.25 | 0.315 | -1.09 | 0.513 |
| 1441897_at   | RIKEN cDNA B230120H23 gene                                                         | B230120H23Rik         | -1.54 | 0.048 | -1.76 | 0.101 | 1.36  | 0.316 | -1.3  | 0.016 | 1     | 0.957 |
| 1448120_at   | growth differentiation factor 9                                                    | Gdf9                  | -1.55 | 0.036 | -1.02 | 0.912 | 1.23  | 0.869 | 1.34  | 0.727 | 1.17  | 0.442 |
| 1433435_at   | expressed sequence AW551984                                                        | AW551984              | -1.55 | 0.030 | 2.01  | 0.059 | -1.36 | 0.112 | 1     | 0.541 | -1.54 | 0.186 |
| 145473_at    | ubiquitin specific peptidase 13 (isopeptidase T-3)                                 | Usp13                 | -1.56 | 0.039 | -1.55 | 0.148 | -1.54 | 0.034 | -1.37 | 0.114 | 1.1   | 0.913 |
| 1458549_at   | LOC436015                                                                          | LOC436015             | -1.56 | 0.050 | -1.05 | 0.545 | 1.62  | 0.862 | -1.04 | 0.491 | 1.64  | 0.148 |
| 1432949_at   | RIKEN cDNA 5330421F21 gene                                                         | 5330421F21Rik         | -1.56 | 0.014 | -1.09 | 0.361 | 1.17  | 0.474 | 1.16  | 0.803 | 1.02  | 0.891 |
| 1431458_at   | RIKEN cDNA 4921507L20 gene                                                         | 4921507L20Rik         | -1.56 | 0.023 | -1.11 | 0.487 | 1.3   | 0.406 | -2.52 | 0.017 | 1.36  | 0.436 |
| 1457129_at   | Zinc finger protein 458                                                            | Zfp458                | -1.57 | 0.044 | -1.09 | 0.546 | 1.13  | 0.959 | 1.26  | 0.474 | 1.03  | 0.783 |
| 1426430_at   | jagged 2                                                                           | Jag2                  | -1.57 | 0.008 | -1.12 | 0.415 | 1.64  | 0.021 | 1.12  | 0.813 | 1.22  | 0.697 |
| 1450063_at   | formin 2                                                                           | Fmn2                  | -1.57 | 0.024 | -2.47 | 0.003 | -1.77 | 0.006 | -1.48 | 0.012 | -1.74 | 0.007 |
| 1446729_at   | dispatched homolog 2 (Drosophila)                                                  | Disp2                 | -1.57 | 0.045 | -1.15 | 0.229 | 1.64  | 0.974 | 1.42  | 0.405 | 2.01  | 0.040 |
| 1453750_x_at | phosphatidylinositol transfer protein, cytoplasmic 1                               | Pitpnc1               | -1.58 | 0.042 | -2.56 | 0.003 | -1.32 | 0.190 | -1.41 | 0.089 | -1.71 | 0.038 |
| 1440702_at   | expressed sequence AU022297                                                        | AU022297              | -1.58 | 0.033 | -1.37 | 0.056 | -1.08 | 0.568 | 1.43  | 0.307 | 1.31  | 0.857 |
| 1420015_s_at | palmitoyl-protein thioesterase 1                                                   | Ppt1                  | -1.59 | 0.011 | -1.36 | 0.011 | 1.11  | 0.920 | -1.09 | 0.357 | 1.14  | 0.918 |
| 1427494_at   | homeo box B7 /// homeo box B8                                                      | Hoxb7 /// Hoxb8       | -1.59 | 0.007 | -1.53 | 0.230 | -1.04 | 0.394 | -1.44 | 0.305 | 3.58  | 0.060 |
| 1436785_a_at | RIKEN cDNA 1110069O07 gene                                                         | 1110069O07Rik         | -1.59 | 0.006 | 1.09  | 0.989 | -1.86 | 0.036 | -1.1  | 0.382 | 1.56  | 0.189 |
| 1449683_x_at | tubulin, beta 2b                                                                   | Tubb2b                | -1.6  | 0.014 | 1.34  | 0.449 | -1.46 | 0.171 | -1.06 | 0.773 | 1.2   | 0.307 |
| 1438241_at   | RGM domain family, member A                                                        | Rgma                  | -1.6  | 0.034 | -1.22 | 0.248 | 1.02  | 0.992 | 1.54  | 0.337 | 1.63  | 0.430 |
| 1422278_at   | dopamine receptor 3                                                                | Drd3                  | -1.6  | 0.017 | -1.6  | 0.047 | 1.2   | 0.800 | -1.49 | 0.266 | -1.03 | 0.607 |
| 1450210_at   | bone morphogenetic protein 15                                                      | Bmp15                 | -1.6  | 0.045 | -1.4  | 0.240 | 1.01  | 0.905 | 1.54  | 0.437 | 2.27  | 0.477 |
| 1444897_at   | expressed sequence AU017263                                                        | AU017263              | -1.6  | 0.032 | 1.02  | 0.759 | -1.1  | 0.530 | 1.13  | 0.448 | -1.21 | 0.509 |
| 1431501_at   | RIKEN cDNA 1700037C18 gene                                                         | 1700037C18Rik         | -1.6  | 0.000 | -2.23 | 0.045 | 1.16  | 0.631 | 2.54  | 0.455 | 1.53  | 0.183 |
| 1419012_at   | zinc finger protein, multitype 2                                                   | Zfp2                  | -1.61 | 0.041 | -2.55 | 0.051 | -1.24 | 0.019 | -1.63 | 0.175 | -1.98 | 0.070 |
| 1444435_at   | vacuolar protein sorting 13B (yeast) /// similar to vacuolar protein sortin Vps13b | Vps13b                | -1.61 | 0.045 | 1.04  | 0.940 | 1.8   | 0.945 | 2.1   | 0.403 | -1.02 | 0.919 |
| 1429309_at   | PR domain containing 16                                                            | Prdm16                | -1.61 | 0.031 | -1    | 0.897 | -1.76 | 0.151 | 2.27  | 0.186 | 1.02  | 0.921 |
| 1457662_x_at | thiamine pyrophosphokinase                                                         | Tpk1                  | -1.62 | 0.031 | -1.61 | 0.116 | -1.2  | 0.264 | -1.74 | 0.064 | -1.44 | 0.039 |
| 1444232_at   | protein kinase, cGMP-dependent, type I                                             | Prkg1                 | -1.62 | 0.014 | -2.34 | 0.001 | -1.58 | 0.011 | -1.35 | 0.096 | -1.77 | 0.016 |
| 1451623_at   | mitochondrial ribosomal protein L15                                                | Mpl15                 | -1.63 | 0.025 | 1.01  | 0.826 | -1.39 | 0.188 | -1.04 | 0.597 | 1.48  | 0.682 |
| 1444993_at   | similar to mortality factor 4 like 1 (predicted) /// similar to mortality facto    | LOC664949 /// LOC6710 | -1.63 | 0.017 | -1.48 | 0.234 | 1.76  | 0.775 | 1.96  | 0.568 | 1.73  | 0.908 |
| 1434572_at   | histone deacetylase 9                                                              | Hdac9                 | -1.63 | 0.028 | -2.01 | 0.147 | -1.2  | 0.318 | 1.38  | 0.759 | -1.39 | 0.406 |
| 1446053_at   | G patch domain and KOW motifs                                                      | Gpkow                 | -1.64 | 0.014 | -1.15 | 0.250 | -1.4  | 0.056 | -1.36 | 0.232 | -1.81 | 0.005 |
| 1449912_at   | synovial sarcoma, X member B, breakpoint 1 /// similar to SSBX1 prote              | Ssx1 /// LOC631002    | -1.65 | 0.032 | -1.12 | 0.840 | 1.51  | 0.631 | 1.01  | 0.882 | 1.64  | 0.613 |
| 1421752_a_at | serine (or cysteine) peptidase inhibitor, clade B, member 5                        | Serpib5               | -1.65 | 0.003 | -2.52 | 0.004 | 1.76  | 0.862 | 2.43  | 0.761 | 1     | 0.732 |
| 1427843_at   | expressed sequence AI840826                                                        | AI840826              | -1.65 | 0.017 | -1.08 | 0.293 | 1.67  | 0.199 | 1.33  | 0.415 | -1.07 | 0.645 |

|              |                                                                                         |               |       |       |       |       |       |       |       |       |       |       |
|--------------|-----------------------------------------------------------------------------------------|---------------|-------|-------|-------|-------|-------|-------|-------|-------|-------|-------|
| 1444697_at   | RIKEN cDNA 4732490B19 gene                                                              | 4732490B19Rik | -1.65 | 0.037 | 1.7   | 0.643 | 1.4   | 0.806 | 2.44  | 0.126 | 1.3   | 0.574 |
| 1431674_at   | RIKEN cDNA 2610303G11 gene                                                              | 2610303G11Rik | -1.65 | 0.034 | 1.3   | 0.580 | 1.81  | 0.427 | 1.49  | 0.901 | 1.41  | 0.692 |
| 1421225_a_at | solute carrier family 4 (anion exchanger), member 4                                     | Slc4a4        | -1.66 | 0.043 | -3.08 | 0.060 | -1.79 | 0.062 | -2.13 | 0.070 | -1.82 | 0.131 |
| 1437944_at   | Src homology 2 domain-containing transforming protein C2                                | Shc2          | -1.66 | 0.039 | 1.05  | 0.969 | 1.04  | 0.980 | 1.99  | 0.319 | -1.44 | 0.148 |
| 1422342_at   | neuromedin B receptor                                                                   | Nmbr          | -1.66 | 0.028 | 1.27  | 0.688 | 1.14  | 0.763 | 1.2   | 0.721 | 1.07  | 0.477 |
| 1429841_at   | multiple EGF-like-domains 10                                                            | Megf10        | -1.66 | 0.022 | -2.13 | 0.020 | 1.22  | 0.769 | -1.87 | 0.023 | -1.41 | 0.127 |
| 1422270_a_at | interleukin 6 receptor, alpha                                                           | Il6ra         | -1.66 | 0.029 | -1.32 | 0.226 | 1.09  | 0.425 | -1.09 | 0.306 | 1.27  | 0.852 |
| 1418268_at   | 5-hydroxytryptamine (serotonin) receptor 3A                                             | Htr3a         | -1.67 | 0.013 | 1.23  | 0.807 | -1.01 | 0.782 | 1.46  | 0.196 | 1.72  | 0.236 |
| 1421725_at   | solute carrier family 26, member 5                                                      | Slc26a5       | -1.68 | 0.018 | 1.71  | 0.342 | 1.31  | 0.516 | 2.93  | 0.175 | 2.81  | 0.065 |
| 1459829_x_at | CDNA sequence BC031781                                                                  | BC031781      | -1.68 | 0.024 | -1.22 | 0.311 | 1.18  | 0.042 | 1.42  | 0.826 | -1.1  | 0.589 |
| 1458116_at   | RIKEN cDNA 9530079D04 gene                                                              | 9530079D04Rik | -1.68 | 0.024 | 1.06  | 0.673 | -1.51 | 0.076 | 2.99  | 0.039 | -1.61 | 0.176 |
| 1430624_at   | RIKEN cDNA 4921511M17 gene /// hypothetical LOC434874 /// hypoth 4921511M17Rik /// LOC- |               | -1.68 | 0.039 | 1.49  | 0.785 | 1.25  | 0.685 | 1.02  | 0.646 | 1.84  | 0.842 |
| 1426175_a_at | tryptase alpha/beta 1                                                                   | Tpsab1        | -1.69 | 0.000 | 1.23  | 0.448 | -1.23 | 0.442 | 1.71  | 0.391 | 1.18  | 0.776 |
| 1457177_at   | RAR-related orphan receptor alpha                                                       | Rora          | -1.69 | 0.018 | -1.47 | 0.240 | 1.46  | 0.864 | -1.17 | 0.373 | -1.9  | 0.051 |
| 1443907_at   | leucyl/cystinyl aminopeptidase                                                          | Lnpep         | -1.69 | 0.020 | -1.31 | 0.228 | 1.05  | 0.975 | -1.09 | 0.466 | 1.25  | 0.291 |
| 1447209_at   | Forkhead box P1                                                                         | Foxp1         | -1.69 | 0.025 | -1.8  | 0.103 | -1.41 | 0.200 | 1.1   | 0.493 | -1.48 | 0.169 |
| 1441255_at   | cadherin 3                                                                              | Cdh3          | -1.69 | 0.014 | -1.37 | 0.121 | -1.19 | 0.169 | -1.15 | 0.374 | 2.15  | 0.825 |
| 1421210_at   | class II transactivator                                                                 | C2ta          | -1.69 | 0.042 | -2.02 | 0.020 | -1.31 | 0.202 | 1.08  | 0.485 | -1    | 0.921 |
| 1432990_at   | RIKEN cDNA 5830495A06 gene                                                              | 5830495A06Rik | -1.69 | 0.024 | -1.31 | 0.442 | 2.13  | 0.122 | -1.46 | 0.292 | 2.42  | 0.566 |
| 1458158_at   | WD repeat domain 67                                                                     | Wdr67         | -1.7  | 0.029 | 1.3   | 0.415 | 2.04  | 0.006 | -1.02 | 0.650 | 1.79  | 0.504 |
| 1459641_at   | Proteasome (prosome, macropain) subunit, beta type 2                                    | Psmb2         | -1.7  | 0.014 | -1.38 | 0.228 | 1.89  | 0.135 | 1.48  | 0.243 | 1.3   | 0.364 |
| 1418989_at   | cathepsin E                                                                             | Ctse          | -1.7  | 0.049 | -1.15 | 0.557 | -1.21 | 0.334 | -1.15 | 0.452 | 1.13  | 0.034 |
| 1451029_at   | Bcl2-like 2                                                                             | Bcl2l2        | -1.7  | 0.050 | 1.35  | 0.885 | 2.07  | 0.281 | 2.4   | 0.138 | 3.02  | 0.345 |
| 1442202_at   | RIKEN cDNA 6430706D22 gene                                                              | 6430706D22Rik | -1.7  | 0.033 | -1.16 | 0.565 | 1.16  | 0.731 | -1.03 | 0.560 | -1.11 | 0.842 |
| 1432180_at   | RIKEN cDNA 4933403G17 gene                                                              | 4933403G17Rik | -1.7  | 0.042 | -1.05 | 0.449 | -1.23 | 0.362 | 2.5   | 0.159 | 1.05  | 0.811 |
| 1432813_at   | RIKEN cDNA 2900064F13 gene                                                              | 2900064F13Rik | -1.7  | 0.032 | -1.49 | 0.289 | -1.04 | 0.483 | 1.21  | 0.986 | 1.42  | 0.975 |
| 1429809_at   | transmembrane and tetratricopeptide repeat containing 2                                 | Tmtc2         | -1.71 | 0.039 | -3.89 | 0.037 | -1.84 | 0.000 | -1.63 | 0.044 | -2    | 0.061 |
| 1430818_at   | transmembrane channel-like gene family 1                                                | Tmc1          | -1.71 | 0.049 | -1.43 | 0.212 | 3.33  | 0.106 | 1.17  | 0.720 | 1.73  | 0.175 |
| 1438616_x_at | seminal vesicle secretion 5                                                             | Svs5          | -1.71 | 0.020 | 1.28  | 0.828 | 1.05  | 0.755 | 1.7   | 0.750 | 1.77  | 0.684 |
| 1438874_at   | non-metastatic cells 7, protein expressed in                                            | Nme7          | -1.71 | 0.014 | 1.25  | 0.335 | 1.41  | 0.781 | 1.47  | 0.315 | 1.09  | 0.426 |
| 1433019_at   | RIKEN cDNA 4833419G08 gene                                                              | 4833419G08Rik | -1.71 | 0.043 | -1.08 | 0.962 | 1.15  | 0.652 | 1.29  | 0.886 | 2.58  | 0.276 |
| 1419526_at   | Gardner-Rasheed feline sarcoma viral (Fgr) oncogene homolog                             | Fgr           | -1.72 | 0.003 | -1.31 | 0.300 | -1.34 | 0.196 | 1.23  | 0.710 | 1.12  | 0.662 |
| 1432575_at   | RIKEN cDNA 4930548F15 gene                                                              | 4930548F15Rik | -1.72 | 0.026 | 1.18  | 0.811 | -1.13 | 0.577 | 1.66  | 0.192 | -1.29 | 0.194 |
| 1440409_at   | RIKEN cDNA 2210401J11 gene                                                              | 2210401J11Rik | -1.72 | 0.015 | 1.05  | 0.709 | 1.43  | 0.265 | 1.92  | 0.547 | 2.83  | 0.313 |
| 1448062_at   | serine/threonine kinase 11                                                              | Stk11         | -1.73 | 0.013 | -1.53 | 0.272 | 1.33  | 0.661 | 1.21  | 0.701 | -1.37 | 0.466 |
| 1422590_at   | cyclin-dependent kinase 5                                                               | Cdk5          | -1.73 | 0.020 | -1.45 | 0.054 | 1.63  | 0.020 | -1.09 | 0.370 | -1.07 | 0.731 |
| 1456629_at   | ankyrin repeat domain 47                                                                | Ankrd47       | -1.73 | 0.025 | 1.14  | 0.879 | 1.43  | 0.870 | 1.52  | 0.407 | 1.81  | 0.124 |
| 1454063_at   | RIKEN cDNA 4933412E24 gene                                                              | 4933412E24Rik | -1.73 | 0.030 | 1.33  | 0.607 | 1.11  | 0.420 | 1.59  | 0.263 | 1.28  | 0.937 |
| 1432752_at   | RIKEN cDNA 4930403O18 gene                                                              | 4930403O18Rik | -1.73 | 0.038 | -1.11 | 0.746 | 1.31  | 0.534 | -1.3  | 0.197 | 1.54  | 0.006 |
| 1436094_at   | VGF nerve growth factor inducible                                                       | Vgf           | -1.74 | 0.008 | -1.73 | 0.244 | -1.27 | 0.601 | 1.44  | 0.790 | -1.02 | 0.826 |
| 1426196_at   | Immunoglobulin heavy chain 1a (serum IgG2a)                                             | Igh-1a        | -1.74 | 0.015 | -1.5  | 0.175 | 1.56  | 0.716 | 3.44  | 0.159 | 1.74  | 0.208 |

|              |                                                                                                    |                       |       |       |       |       |       |       |       |       |       |       |
|--------------|----------------------------------------------------------------------------------------------------|-----------------------|-------|-------|-------|-------|-------|-------|-------|-------|-------|-------|
| 1445117_at   | Glycosyltransferase 28 domain containing 1                                                         | GlT28d1               | -1.74 | 0.033 | -1.65 | 0.088 | 1.55  | 0.716 | -1.38 | 0.308 | 2.19  | 0.037 |
| 1445677_x_at | solute carrier family 35, member F2                                                                | Slc35f2               | -1.75 | 0.036 | -1.62 | 0.103 | 1.11  | 0.933 | -1.56 | 0.233 | -1.25 | 0.266 |
| 1452878_at   | protein kinase C, epsilon                                                                          | Prkce                 | -1.75 | 0.015 | -5.11 | 0.011 | -1.19 | 0.204 | -1.78 | 0.034 | -1.69 | 0.021 |
| 1439729_at   | RIKEN cDNA A930038B10 gene                                                                         | A930038B10Rik         | -1.75 | 0.041 | 1.27  | 0.755 | 1.01  | 0.550 | 1.62  | 0.461 | 1.94  | 0.478 |
| 1454262_at   | RIKEN cDNA 1700124P09 gene                                                                         | 1700124P09Rik         | -1.75 | 0.025 | 1.67  | 0.891 | 1.19  | 0.536 | 1.13  | 0.493 | 1.98  | 0.531 |
| 1451699_at   | similar to putative retrovirus-related gag protein /// hypothetical protein                        | LOC668468 /// LOC6686 | -1.76 | 0.040 | -1.6  | 0.033 | -1.01 | 0.626 | 1.18  | 0.305 | -1.05 | 0.521 |
| 1445751_at   | Procollagen, type XII, alpha 1                                                                     | Col12a1               | -1.76 | 0.015 | 1.34  | 0.666 | -1.59 | 0.229 | 1.19  | 0.302 | 2.06  | 0.502 |
| 1450168_at   | ankyrin repeat domain 12                                                                           | Ankrd12               | -1.76 | 0.013 | -1.32 | 0.428 | -1.5  | 0.253 | 1.18  | 0.799 | -1.19 | 0.364 |
| 1435510_at   | protein phosphatase 1H (PP2C domain containing)                                                    | Ppm1h                 | -1.77 | 0.015 | 1.09  | 0.808 | -1.65 | 0.113 | -1.36 | 0.319 | 1.33  | 0.503 |
| 1442814_at   | Glucocorticoid induced transcript 1                                                                | Glcci1                | -1.77 | 0.031 | -1.11 | 0.559 | -1.06 | 0.514 | 2.44  | 0.205 | 1.97  | 0.617 |
| 1439002_s_at | chorionic somatomammotropin hormone 1                                                              | Csh1                  | -1.77 | 0.036 | 1.6   | 0.451 | -1.58 | 0.098 | 1.94  | 0.435 | 1.52  | 0.994 |
| 1430200_at   | RIKEN cDNA 4930579D07 gene                                                                         | 4930579D07Rik         | -1.77 | 0.045 | -1.27 | 0.177 | -1.15 | 0.239 | 1.52  | 0.659 | 3.02  | 0.109 |
| 1454784_at   | heparan sulfate (glucosamine) 3-O-sulfotransferase 2                                               | Hs3st2                | -1.78 | 0.039 | 1     | 0.825 | -1.06 | 0.866 | 1.02  | 0.603 | 1.54  | 0.281 |
| 1438801_at   | dynammin 3                                                                                         | Dnm3                  | -1.78 | 0.031 | -1.65 | 0.017 | 1.17  | 0.407 | -1.73 | 0.065 | -1.4  | 0.106 |
| 1436397_at   | cDNA sequence BC027057                                                                             | BC027057              | -1.78 | 0.040 | 1.28  | 0.490 | -1.33 | 0.282 | 1.26  | 0.951 | 1.83  | 0.151 |
| 1447663_at   | A kinase (PRKA) anchor protein 13                                                                  | Akap13                | -1.78 | 0.047 | -1.66 | 0.166 | 1.01  | 0.970 | -1.18 | 0.457 | 1.82  | 0.445 |
| 1453076_at   | RIKEN cDNA 9130211I03 gene                                                                         | 9130211I03Rik         | -1.78 | 0.044 | -1.45 | 0.291 | 1.76  | 0.981 | 1.3   | 0.802 | -1.09 | 0.316 |
| 1429742_at   | regulator of chromosome condensation (RCC1) and BTB (POZ) domain                                   | Rcctb2                | -1.79 | 0.049 | -1.37 | 0.169 | 1.07  | 0.789 | -1.24 | 0.384 | 1.66  | 0.359 |
| 1444078_at   | CD8 antigen, alpha chain /// similar to T-cell surface glycoprotein CD8 ; Cd8a /// LOC636147 /// L |                       | -1.79 | 0.029 | 1.02  | 0.959 | -1.11 | 0.387 | 1.12  | 0.139 | 1.24  | 0.248 |
| 1429197_s_at | RAB GTPase activating protein 1-like                                                               | Rabgap1l              | -1.8  | 0.008 | -2.32 | 0.006 | -1.41 | 0.160 | -1.5  | 0.005 | -1.61 | 0.052 |
| 1421656_at   | sprouty homolog 2 (Drosophila)                                                                     | Spry2                 | -1.81 | 0.010 | -1.04 | 0.881 | 1.44  | 0.364 | 2.76  | 0.103 | 1.25  | 0.435 |
| 1434308_at   | solute carrier family 43, member 2                                                                 | Slc43a2               | -1.81 | 0.012 | -1.04 | 0.532 | 1.25  | 0.819 | 1.38  | 0.119 | 1.34  | 0.360 |
| 1453354_at   | NADH dehydrogenase (ubiquinone) Fe-S protein 1                                                     | Ndufs1                | -1.81 | 0.048 | -1.57 | 0.202 | 1.05  | 0.842 | 1.04  | 0.633 | 2.56  | 0.173 |
| 1437876_at   | fibronectin type III domain containing 6                                                           | Fndc6                 | -1.81 | 0.047 | 1.11  | 0.993 | 2.42  | 0.384 | 1.57  | 0.935 | 1.42  | 0.298 |
| 1458716_at   | dual specificity phosphatase 27 (putative)                                                         | Dusp27                | -1.81 | 0.036 | 1.56  | 0.540 | 2.25  | 0.001 | 2.85  | 0.561 | 2.06  | 0.195 |
| 1418959_at   | transmembrane protease, serine 5 (spinesin)                                                        | Tmprss5               | -1.82 | 0.019 | 1.7   | 0.294 | -1.13 | 0.410 | 1.37  | 0.879 | 1.64  | 0.214 |
| 1439318_at   | microtubule associated serine/threonine kinase family member 4                                     | Mast4                 | -1.82 | 0.036 | -1.56 | 0.124 | 1.03  | 0.537 | -1.07 | 0.770 | 1.14  | 0.979 |
| 1455540_at   | carbamoyl-phosphate synthetase 1                                                                   | Cps1                  | -1.82 | 0.026 | -2.72 | 0.068 | 1.27  | 0.432 | -2.13 | 0.029 | 1.46  | 0.460 |
| 1453691_at   | RIKEN cDNA 4921528I07 gene                                                                         | 4921528I07Rik         | -1.82 | 0.047 | 1.22  | 0.188 | 1.01  | 0.997 | -1.64 | 0.136 | -1.03 | 0.661 |
| 1426007_a_at | UBX domain containing 3                                                                            | Ubx3                  | -1.83 | 0.003 | -1.53 | 0.152 | -1.26 | 0.179 | 1.26  | 0.938 | 1.22  | 0.053 |
| 1458127_at   | Cell adhesion molecule-related/down-regulated by oncogenes                                         | Cdon                  | -1.83 | 0.033 | -1.08 | 0.591 | 1.02  | 0.478 | 1.32  | 0.152 | 1.15  | 0.992 |
| 1452539_a_at | CD247 antigen                                                                                      | Cd247                 | -1.83 | 0.029 | -1.46 | 0.162 | 1.07  | 0.445 | -1.59 | 0.138 | -1.14 | 0.298 |
| 1439759_x_at | RIKEN cDNA 2410078J06 gene                                                                         | 2410078J06Rik         | -1.83 | 0.034 | -1.42 | 0.230 | 1.24  | 0.931 | -1.09 | 0.407 | 1.46  | 0.585 |
| 1453315_at   | within bgn homolog (Drosophila)                                                                    | Wibgn                 | -1.84 | 0.050 | -1.42 | 0.266 | 1.99  | 0.152 | 1     | 0.493 | -1.2  | 0.242 |
| 1418948_at   | fascin homolog 3, actin-bundling protein, testicular (Strongylocentrotus                           | Fscn3                 | -1.85 | 0.007 | -1.07 | 0.540 | 1.14  | 0.612 | -1.27 | 0.089 | -1.97 | 0.040 |
| 1440754_at   | Ankyrin repeat and KH domain containing 1                                                          | Ankhd1                | -1.85 | 0.038 | -1.56 | 0.227 | 1.75  | 0.878 | -1.47 | 0.107 | 1.56  | 0.986 |
| 1447110_at   | RIKEN cDNA 4921513D23 gene                                                                         | 4921513D23Rik         | -1.85 | 0.015 | -1.43 | 0.216 | -1.32 | 0.363 | 1.38  | 0.264 | 1.53  | 0.065 |
| 1443515_at   | RIKEN cDNA 1110032F04 gene                                                                         | 1110032F04Rik         | -1.85 | 0.022 | -1.37 | 0.212 | -1.1  | 0.221 | -1.08 | 0.271 | 1.14  | 0.614 |
| 1429577_at   | IQ motif containing F4                                                                             | Iqcf4                 | -1.86 | 0.030 | -1.43 | 0.050 | 1.04  | 0.575 | 1.47  | 0.629 | 1.33  | 0.903 |
| 1459929_at   | zinc finger protein 568                                                                            | Zfp568                | -1.87 | 0.030 | -1.18 | 0.223 | 1.79  | 0.997 | -1.71 | 0.077 | 1.19  | 0.795 |
| 1422081_at   | kyphoscoliosis peptidase                                                                           | Ky                    | -1.87 | 0.050 | -1.42 | 0.245 | 2.02  | 0.636 | -1.28 | 0.371 | -1.03 | 0.550 |

|              |                                                                                      |                        |       |       |       |       |       |       |       |       |       |       |
|--------------|--------------------------------------------------------------------------------------|------------------------|-------|-------|-------|-------|-------|-------|-------|-------|-------|-------|
| 1457579_at   | DNA segment, Chr 11, ERATO Doi 717, expressed                                        | D11Erd717e             | -1.87 | 0.031 | -1.16 | 0.477 | 1.71  | 0.513 | -1.79 | 0.103 | 1.42  | 0.436 |
| 1439642_at   | RIKEN cDNA 5930403N24 gene                                                           | 5930403N24Rik          | -1.87 | 0.042 | -1.06 | 0.672 | -1.21 | 0.331 | 1.15  | 0.880 | -1.2  | 0.442 |
| 1457239_at   | Spleen tyrosine kinase                                                               | Syk                    | -1.88 | 0.022 | -5.5  | 0.001 | 4.44  | 0.076 | 1.09  | 0.745 | 1.46  | 0.582 |
| 1437693_at   | DNA segment, Chr 1, Pasteur Institute 1                                              | D1Pas1                 | -1.88 | 0.020 | -1.22 | 0.453 | 2.26  | 0.106 | -1.41 | 0.265 | -1.03 | 0.471 |
| 1432669_at   | RIKEN cDNA 9030420N05 gene                                                           | 9030420N05Rik          | -1.88 | 0.020 | 1.12  | 0.915 | 1.58  | 0.318 | 1.18  | 0.736 | -1.31 | 0.162 |
| 1447108_at   | RAD51-like 1 ( <i>S. cerevisiae</i> )                                                | Rad5111                | -1.89 | 0.000 | -1.57 | 0.254 | -1.06 | 0.784 | 2.3   | 0.295 | 1.87  | 0.718 |
| 1422276_at   | pyrimidineric receptor P2Y, G-protein coupled, 4                                     | P2ry4                  | -1.89 | 0.046 | 1.19  | 0.302 | 1.14  | 0.904 | 1.92  | 0.075 | 2     | 0.179 |
| 1440586_at   | RIKEN cDNA B430203I24 gene                                                           | B430203I24Rik          | -1.89 | 0.031 | -3.07 | 0.041 | -1.74 | 0.111 | 3.59  | 0.832 | -2.05 | 0.137 |
| 1456680_at   | UDP-GlcNAc:betaGal beta-1,3-N-acetylglucosaminyltransferase 6 (cor                   | B3gnt6                 | -1.89 | 0.025 | -1.19 | 0.389 | 1.44  | 0.145 | 1     | 0.780 | 1.27  | 0.870 |
| 1456165_at   | RIKEN cDNA 4921521F21 gene                                                           | 4921521F21Rik          | -1.89 | 0.028 | -2.03 | 0.019 | -1.12 | 0.448 | -1.08 | 0.542 | 2.64  | 0.147 |
| 1427292_at   | immunoglobulin lambda chain, variable 1                                              | Igl-V1                 | -1.9  | 0.050 | -3.15 | 0.016 | 1.08  | 0.664 | 2.86  | 0.435 | 2.85  | 0.005 |
| 1446542_at   | acyl-CoA synthetase short-chain family member 2                                      | Acss2                  | -1.9  | 0.045 | -1.22 | 0.126 | 1.66  | 0.023 | -1.13 | 0.256 | 1.76  | 0.498 |
| 1443592_at   | expressed sequence AA617406                                                          | AA617406               | -1.9  | 0.046 | -1.31 | 0.273 | 2.12  | 0.602 | 1.05  | 0.883 | 1.11  | 0.942 |
| 1432933_at   | RIKEN cDNA 4930429N05 gene                                                           | 4930429N05Rik          | -1.9  | 0.009 | -1.54 | 0.274 | 1.02  | 0.997 | 1.15  | 0.896 | 2.08  | 0.108 |
| 1449887_at   | RIKEN cDNA 2310010I16 gene                                                           | 2310010I16Rik          | -1.9  | 0.018 | -1.15 | 0.400 | 1.31  | 0.472 | 1.6   | 0.750 | 1.99  | 0.880 |
| 1428751_at   | Park2 co-regulated                                                                   | Pacrg                  | -1.91 | 0.030 | -1.66 | 0.072 | -1.36 | 0.292 | 1.11  | 0.420 | 1.21  | 0.580 |
| 1458487_at   | Kruppel-like factor 3 (basic) /// RIKEN cDNA C230096K16 gene                         | Klf3 /// C230096K16Rik | -1.91 | 0.042 | 1.26  | 0.535 | 1.27  | 0.874 | -1.3  | 0.237 | -1.01 | 0.703 |
| 1446513_at   | A disintegrin-like and metallopeptidase (repolysin type) with thrombos               | Adamts19               | -1.91 | 0.048 | -1.01 | 0.735 | 1.93  | 0.532 | -1.36 | 0.262 | 1.14  | 0.642 |
| 1427339_at   | solute carrier family 30 (zinc transporter), member 2                                | Slc30a2                | -1.93 | 0.038 | -1.57 | 0.080 | 1.1   | 0.803 | -1.04 | 0.479 | -1.02 | 0.414 |
| 1428776_at   | solute carrier family 10 (sodium/bile acid cotransporter family), member             | Slc10a6                | -1.93 | 0.023 | -1.21 | 0.459 | 1.1   | 0.889 | -1.58 | 0.152 | 1.74  | 0.223 |
| 1439370_x_at | splicing factor 3b, subunit 5                                                        | Sf3b5                  | -1.93 | 0.025 | -2.1  | 0.067 | 1.16  | 0.907 | 1.03  | 0.856 | 1.11  | 0.470 |
| 1457144_at   | sodium channel, voltage-gated, type II, beta                                         | Scn2b                  | -1.93 | 0.004 | -1.37 | 0.383 | 1.63  | 0.884 | -1.08 | 0.491 | 1.19  | 0.732 |
| 1438334_at   | Dedicator of cyto-kinesis 2                                                          | Dock2                  | -1.93 | 0.036 | -1.05 | 0.694 | 1.39  | 0.500 | 1.15  | 0.914 | 1.73  | 0.979 |
| 1446757_at   | SGT1, suppressor of G2 allele of SKP1 ( <i>S. cerevisiae</i> )                       | Sugt1                  | -1.94 | 0.041 | -3.01 | 0.011 | -1.02 | 0.863 | 1.95  | 0.129 | -1.29 | 0.294 |
| 1440712_at   | Poly(rC) binding protein 3                                                           | Pcbp3                  | -1.94 | 0.037 | -1.14 | 0.345 | 1.16  | 0.920 | 1.7   | 0.842 | -1.51 | 0.137 |
| 1445021_at   | RIKEN cDNA 6030465E24 gene                                                           | 6030465E24Rik          | -1.94 | 0.022 | -1.97 | 0.050 | 1.14  | 0.440 | 1.56  | 0.390 | 1.3   | 0.844 |
| 1451938_a_at | syntrophin, basic 1                                                                  | Sntb1                  | -1.95 | 0.038 | -1.01 | 0.700 | 1.09  | 0.606 | -1.17 | 0.123 | 1.47  | 0.221 |
| 1440175_at   | Epsin 2                                                                              | Epn2                   | -1.95 | 0.049 | -1.59 | 0.141 | -1.42 | 0.224 | 1.69  | 0.879 | -1.66 | 0.069 |
| 1444849_at   | expressed sequence C76872                                                            | C76872                 | -1.95 | 0.032 | -1.24 | 0.089 | -1.06 | 0.545 | 1.05  | 0.957 | 1.15  | 0.626 |
| 1451614_a_at | amelogenin X chromosome                                                              | Amelx                  | -1.95 | 0.042 | -1.51 | 0.167 | -1.17 | 0.509 | -2.41 | 0.014 | 1.6   | 0.954 |
| 1443274_at   | RIKEN cDNA 4932435O22 gene                                                           | 4932435O22Rik          | -1.95 | 0.042 | 1.68  | 0.573 | 1.91  | 0.702 | -1.02 | 0.585 | 1.1   | 0.566 |
| 1455737_at   | RIKEN cDNA C030002B11 gene                                                           | C030002B11Rik          | -1.96 | 0.021 | 1.25  | 0.825 | 3.02  | 0.085 | 1.2   | 0.876 | 2.13  | 0.011 |
| 1437833_at   | latent transforming growth factor beta binding protein 3                             | Ltbp3                  | -1.97 | 0.039 | -1.42 | 0.443 | 2.45  | 0.198 | 1.61  | 0.026 | -1.29 | 0.472 |
| 1454152_a_at | G protein-coupled receptor kinase 2, groucho gene related ( <i>Drosophila</i> Gprk2l |                        | -1.97 | 0.002 | -1.53 | 0.139 | 2.03  | 0.812 | 1.23  | 0.118 | 1.99  | 0.540 |
| 1421244_at   | estrogen receptor 1 (alpha)                                                          | Esr1                   | -1.97 | 0.015 | 1.18  | 0.875 | 1.19  | 0.672 | 1.41  | 0.968 | 1.73  | 0.498 |
| 1434755_at   | coronin, actin binding protein, 2B                                                   | Coro2b                 | -1.97 | 0.038 | -1.39 | 0.477 | 1.25  | 0.807 | 1.95  | 0.690 | 1.26  | 0.809 |
| 1432628_at   | chromobox homolog 3 ( <i>Drosophila</i> HP1 gamma)                                   | Cbx3                   | -1.97 | 0.007 | -1    | 0.770 | 1.25  | 0.563 | 1.28  | 0.554 | 1.35  | 0.094 |
| 1440770_at   | B-cell leukemia/lymphoma 2                                                           | Bcl2                   | -1.97 | 0.018 | -1.06 | 0.554 | 1.37  | 0.814 | -1.03 | 0.428 | 2.29  | 0.758 |
| 1429358_at   | RIKEN cDNA 4921533L14 gene                                                           | 4921533L14Rik          | -1.97 | 0.010 | -1.55 | 0.201 | 2.26  | 0.145 | 1.53  | 0.768 | 1.44  | 0.798 |
| 1460611_at   | expressed sequence C87499                                                            | C87499                 | -1.99 | 0.011 | 1.18  | 0.590 | -1.67 | 0.201 | 1.02  | 0.636 | 2.94  | 0.635 |
| 1451261_s_at | expressed sequence AW049765                                                          | AW049765               | -1.99 | 0.000 | -1.28 | 0.335 | 1.68  | 0.875 | 1.28  | 0.831 | 3.51  | 0.297 |

|              |                                                                             |                             |       |       |       |       |       |       |       |       |       |       |
|--------------|-----------------------------------------------------------------------------|-----------------------------|-------|-------|-------|-------|-------|-------|-------|-------|-------|-------|
| 1446230_at   | Gene model 944, (NCBI)                                                      | Gm944                       | -2    | 0.031 | 1.28  | 0.316 | 1.69  | 0.768 | 1.17  | 0.580 | 2.6   | 0.260 |
| 1443552_at   | RIKEN cDNA E230008N13 gene                                                  | E230008N13Rik               | -2    | 0.001 | 1.11  | 0.887 | 1.21  | 0.844 | 3.18  | 0.279 | -1.26 | 0.376 |
| 1443445_at   | Diaphanous homolog 3 (Drosophila)                                           | Diap3                       | -2    | 0.037 | -1.25 | 0.420 | 1.03  | 0.517 | 1.32  | 0.215 | 1.08  | 0.971 |
| 1457766_at   | WAP four-disulfide core domain 6A                                           | Wdc6a                       | -2.01 | 0.041 | -1.68 | 0.086 | 1.32  | 0.596 | 1.73  | 0.684 | -1.34 | 0.336 |
| 1437855_at   | microtubule-associated protein 4                                            | Mtap4                       | -2.01 | 0.011 | -2.07 | 0.039 | -1.06 | 0.748 | -1.52 | 0.080 | -1.48 | 0.144 |
| 1455833_at   | expressed sequence AU041783                                                 | AU041783                    | -2.01 | 0.034 | -1.58 | 0.059 | -1.22 | 0.236 | -1.03 | 0.848 | 1.1   | 0.831 |
| 1439355_at   | Pleckstrin homology domain containing, family A member 5                    | Plekha5                     | -2.02 | 0.030 | 1.01  | 0.846 | 1.26  | 0.599 | 1.05  | 0.654 | 1.35  | 0.773 |
| 1457442_at   | expressed sequence AW125324                                                 | AW125324                    | -2.02 | 0.009 | -1.51 | 0.081 | -1.12 | 0.438 | -1.09 | 0.907 | 1.27  | 0.303 |
| 1449064_at   | L-threonine dehydrogenase                                                   | Tdh                         | -2.03 | 0.047 | -2.13 | 0.113 | 1.21  | 0.794 | 1.32  | 0.364 | 1.11  | 0.779 |
| 1417121_at   | gamma-aminobutyric acid (GABA-A) receptor, subunit alpha 6                  | Gabra6                      | -2.03 | 0.012 | -1.49 | 0.104 | 1.32  | 0.793 | -1.21 | 0.109 | 1.15  | 0.653 |
| 1452135_at   | glutathione peroxidase 6                                                    | Gpx6                        | -2.04 | 0.035 | -1.49 | 0.384 | -1.33 | 0.282 | 1.22  | 0.455 | -1.02 | 0.512 |
| 1438160_x_at | solute carrier organic anion transporter family, member 4a1                 | Slco4a1                     | -2.05 | 0.030 | 1.19  | 0.909 | 1.65  | 0.792 | 2.27  | 0.007 | -1.17 | 0.284 |
| 1459868_x_at | interleukin 11 receptor, alpha chain 1 /// interleukin 11 receptor, alpha c | Il11ra1 /// Il11ra2 /// LOC | -2.05 | 0.004 | -1.58 | 0.160 | 1     | 0.522 | 1.51  | 0.068 | -1.59 | 0.079 |
| 1420018_s_at | tetraspanin 8                                                               | Tspan8                      | -2.06 | 0.041 | -1.26 | 0.378 | -1.19 | 0.505 | 1.74  | 0.115 | 2.53  | 0.249 |
| 1444266_at   | Homeobox only domain                                                        | Hod                         | -2.06 | 0.048 | -1.66 | 0.153 | -1.14 | 0.028 | 1.15  | 0.743 | 1.58  | 0.450 |
| 1440899_at   | flavin containing monooxygenase 5                                           | Fmo5                        | -2.06 | 0.044 | -2.09 | 0.052 | 1.52  | 0.712 | 2.13  | 0.777 | 1.54  | 0.771 |
| 1430251_at   | RIKEN cDNA D330022H12 gene                                                  | D330022H12Rik               | -2.06 | 0.013 | -1.29 | 0.352 | 1.28  | 0.429 | -2.09 | 0.022 | -1.61 | 0.192 |
| 1459491_at   | DNA segment, Chr 12, ERATO Doi 673, expressed                               | D12Erd673e                  | -2.06 | 0.019 | 1.02  | 0.944 | -1.17 | 0.354 | 1.55  | 0.221 | -2.28 | 0.038 |
| 1438364_x_at | angiogenin, ribonuclease A family, member 4                                 | Ang4                        | -2.06 | 0.002 | 1.34  | 0.577 | 1.3   | 0.924 | -1.45 | 0.232 | 2.04  | 0.492 |
| 1450810_at   | follicle stimulating hormone receptor                                       | Fshr                        | -2.07 | 0.022 | 1.21  | 0.865 | 2.06  | 0.757 | 1.4   | 0.758 | 1.13  | 0.937 |
| 1428118_at   | leucine rich repeat neuronal 6A                                             | Lrrn6a                      | -2.08 | 0.029 | 1.23  | 0.192 | 1.1   | 0.531 | 1.02  | 0.870 | 1.55  | 0.093 |
| 1430185_at   | RIKEN cDNA 5830460E08 gene                                                  | 5830460E08Rik               | -2.08 | 0.019 | -1.56 | 0.041 | -1.01 | 0.985 | 1.47  | 0.843 | -1.93 | 0.125 |
| 1448443_at   | serine (or cysteine) peptidase inhibitor, clade I, member 1                 | Serpini1                    | -2.09 | 0.001 | -3.42 | 0.005 | 2.14  | 0.536 | 2.54  | 0.667 | 1.23  | 0.611 |
| 1432981_at   | mitogen-activated protein kinase kinase kinase 9                            | Map3k9                      | -2.09 | 0.045 | -1.42 | 0.071 | -1.23 | 0.420 | 1.02  | 0.743 | -1.39 | 0.099 |
| 1449279_at   | glutathione peroxidase 2                                                    | Gpx2                        | -2.09 | 0.031 | 1.02  | 0.900 | 1.23  | 0.493 | 1.39  | 0.500 | -1.25 | 0.516 |
| 1426147_s_at | claudin 10                                                                  | Cldn10                      | -2.09 | 0.017 | -2.56 | 0.008 | 1.36  | 0.863 | -1.32 | 0.279 | 1.11  | 0.898 |
| 1437590_at   | RIKEN cDNA 4833409A17 gene                                                  | 4833409A17Rik               | -2.09 | 0.028 | -1.24 | 0.497 | 1.97  | 0.321 | 1.42  | 0.766 | -1.59 | 0.275 |
| 1458326_at   | polymerase (RNA) II (DNA directed) polypeptide E                            | Polr2e                      | -2.1  | 0.031 | -2.15 | 0.085 | 1.18  | 0.554 | 1.89  | 0.144 | 1.65  | 0.898 |
| 1424230_at   | exocyst complex component 6                                                 | Exoc6                       | -2.1  | 0.003 | -1.35 | 0.125 | 2.38  | 0.547 | 1.04  | 0.877 | -1.04 | 0.790 |
| 1432771_at   | solute carrier family 9 (sodium/hydrogen exchanger), member 3               | Slc9a3                      | -2.11 | 0.027 | -1.44 | 0.157 | -1.19 | 0.389 | 1.54  | 0.801 | 1.58  | 0.497 |
| 1442009_at   | eukaryotic translation initiation factor 2C, 3                              | Eif2c3                      | -2.11 | 0.048 | -1.49 | 0.065 | 1.01  | 0.771 | -1.6  | 0.167 | 1.98  | 0.514 |
| 1459949_at   | ATP synthase, H+ transporting, mitochondrial F0 complex, subunit s          | Atp5s                       | -2.11 | 0.032 | -1.2  | 0.478 | -1.26 | 0.187 | -1.03 | 0.976 | 1.09  | 0.669 |
| 1453204_at   | RIKEN cDNA 4933431K14 gene                                                  | 4933431K14Rik               | -2.12 | 0.036 | 1.12  | 0.447 | 1.1   | 0.996 | -1.38 | 0.105 | 1.67  | 0.765 |
| 1431191_a_at | synaptotagmin I                                                             | Syt1                        | -2.13 | 0.048 | 1.01  | 0.919 | -1.35 | 0.162 | -1.17 | 0.489 | 1.89  | 0.521 |
| 1425111_at   | sortilin-related VPS10 domain containing receptor 3                         | Sorcs3                      | -2.13 | 0.013 | 1.61  | 0.228 | 1.12  | 0.981 | -1.37 | 0.248 | 1.14  | 0.884 |
| 1456334_s_at | RIKEN cDNA A230106D06 gene                                                  | A230106D06Rik               | -2.13 | 0.004 | -1.92 | 0.094 | 1.06  | 0.713 | 1.83  | 0.467 | -1.12 | 0.528 |
| 1434616_at   | RIKEN cDNA 1810073N04 gene                                                  | 1810073N04Rik               | -2.13 | 0.019 | 1.32  | 0.752 | -1.3  | 0.336 | 1.42  | 0.943 | -1.21 | 0.405 |
| 1438099_at   | triple functional domain (PTPRF interacting)                                | Trio                        | -2.14 | 0.003 | -2.44 | 0.075 | -2.59 | 0.074 | 1.9   | 0.917 | 1.25  | 0.523 |
| 1435155_at   | cingulin                                                                    | Cgn                         | -2.14 | 0.001 | -1.51 | 0.138 | 1.05  | 0.730 | -1.11 | 0.619 | -1.56 | 0.032 |
| 1452050_at   | calcium/calmodulin-dependent protein kinase ID                              | Camk1d                      | -2.14 | 0.028 | -5.47 | 0.022 | -1.24 | 0.338 | -2.13 | 0.093 | -3.12 | 0.002 |
| 1435627_x_at | MARCKS-like 1 /// similar to MARCKS-related protein (MARCKS-like p          | Marcks1 /// LOC673071       | -2.15 | 0.043 | -1.04 | 0.646 | -1.12 | 0.706 | -1    | 0.980 | 1.22  | 0.059 |

|            |                                                                         |                        |       |       |       |       |       |       |       |       |       |       |
|------------|-------------------------------------------------------------------------|------------------------|-------|-------|-------|-------|-------|-------|-------|-------|-------|-------|
| 1418642_at | lymphocyte cytosolic protein 2                                          | Lcp2                   | -2.15 | 0.004 | -1.31 | 0.325 | 1.44  | 0.350 | 1.7   | 0.772 | 1.13  | 0.099 |
| 1441310_at | A disintegrin-like and metallopeptidase (reprolysin type) with thrombos | Adamts15               | -2.15 | 0.006 | -1.07 | 0.478 | 1.17  | 0.568 | 1.35  | 0.132 | -1.14 | 0.532 |
| 1453892_at | RIKEN cDNA A930007119 gene                                              | A930007119Rik          | -2.15 | 0.011 | -1.34 | 0.230 | -1.68 | 0.190 | 2.77  | 0.610 | 1.08  | 0.680 |
| 1445171_at | RIKEN cDNA 1700067C01 gene /// RIKEN cDNA A230107C01 gene               | 1700067C01Rik /// A230 | -2.15 | 0.048 | 1.74  | 0.770 | 1.83  | 0.884 | 1.37  | 0.631 | 1.77  | 0.956 |
| 1444514_at | RIKEN cDNA B930096F20 gene                                              | B930096F20Rik          | -2.16 | 0.021 | -2.19 | 0.013 | 1.95  | 0.144 | -1.49 | 0.028 | 2.05  | 0.284 |
| 1458307_at | RIKEN cDNA B230334C09 gene                                              | B230334C09Rik          | -2.16 | 0.036 | 1.33  | 0.458 | -1.46 | 0.157 | -1.73 | 0.016 | 2.26  | 0.712 |
| 1431276_at | RIKEN cDNA 9130019P16 gene                                              | 9130019P16Rik          | -2.16 | 0.020 | -1.02 | 0.737 | 1.06  | 0.788 | -1.23 | 0.553 | 2.9   | 0.543 |
| 1454446_at | RIKEN cDNA 4930564B12 gene                                              | 4930564B12Rik          | -2.17 | 0.046 | -2.46 | 0.097 | 1.33  | 0.883 | -1.58 | 0.225 | 2.73  | 0.142 |
| 1428601_at | RIKEN cDNA 1700003E16 gene                                              | 1700003E16Rik          | -2.17 | 0.046 | -1.55 | 0.191 | 1.08  | 0.430 | -1.24 | 0.328 | 1.53  | 0.364 |
| 1457768_at | prune homolog (Drosophila)                                              | Prune                  | -2.18 | 0.021 | -1.12 | 0.572 | 1.44  | 0.985 | 1.17  | 0.660 | 1.19  | 0.803 |
| 1442079_at | transmembrane protein 23                                                | Tmem23                 | -2.19 | 0.004 | -1.34 | 0.292 | -1.21 | 0.555 | -1.54 | 0.239 | -1.3  | 0.225 |
| 1432956_at | RIKEN cDNA 4930444K16 gene                                              | 4930444K16Rik          | -2.19 | 0.005 | -1.45 | 0.228 | 1.79  | 0.585 | 1.96  | 0.417 | 1.83  | 0.255 |
| 1456369_at | protection of telomeres 1                                               | Pot1                   | -2.2  | 0.048 | -1.41 | 0.258 | 1.18  | 0.754 | 1.7   | 0.500 | 3.52  | 0.098 |
| 1434582_at | DNA segment, Chr 14, ERATO Doi 171, expressed                           | D14ErtD171e            | -2.2  | 0.031 | -3.44 | 0.041 | -2.08 | 0.048 | -1.68 | 0.048 | -2.95 | 0.032 |
| 1439188_at | cleavage and polyadenylation specific factor 6                          | Cpsf6                  | -2.2  | 0.009 | -2.19 | 0.021 | -1.05 | 0.575 | -1.32 | 0.358 | -1.57 | 0.186 |
| 1432449_at | RIKEN cDNA 4930564B18 gene                                              | 4930564B18Rik          | -2.2  | 0.045 | -1.97 | 0.045 | -1.07 | 0.423 | 1.9   | 0.090 | 1.26  | 0.382 |
| 1436903_at | ubiquilin 3                                                             | Ubqln3                 | -2.21 | 0.038 | -1.75 | 0.153 | 1.18  | 0.647 | -1.42 | 0.142 | 1.02  | 0.768 |
| 1451443_at | nuclear factor I/X                                                      | Nfix                   | -2.21 | 0.022 | -2.23 | 0.006 | 1.17  | 0.766 | -1.83 | 0.149 | 1.28  | 0.414 |
| 1432106_at | RIKEN cDNA 6530403M18 gene                                              | 6530403M18Rik          | -2.21 | 0.014 | -2.2  | 0.027 | 1.06  | 0.494 | -1.03 | 0.626 | 2.01  | 0.162 |
| 1445120_at | expressed sequence AU021977                                             | AU021977               | -2.22 | 0.016 | -1.31 | 0.336 | -1.33 | 0.418 | 1.42  | 0.461 | -1.08 | 0.624 |
| 1455140_at | RIKEN cDNA A330068P14 gene                                              | A330068P14Rik          | -2.22 | 0.036 | -1.03 | 0.832 | 2.17  | 0.098 | 1.3   | 0.648 | -1.78 | 0.033 |
| 1425386_at | RIKEN cDNA 4833422F24 gene                                              | 4833422F24Rik          | -2.22 | 0.048 | -2    | 0.079 | 1.41  | 0.430 | -1.15 | 0.474 | -1.12 | 0.199 |
| 1433337_at | RIKEN cDNA 6720460K10 gene                                              | 6720460K10Rik          | -2.23 | 0.021 | -1.2  | 0.277 | -1.49 | 0.093 | -1.03 | 0.877 | 1.58  | 0.097 |
| 1458000_at | desmoglein 1 alpha                                                      | Dsg1a                  | -2.26 | 0.039 | 1.16  | 0.964 | 1.01  | 0.521 | 1.81  | 0.027 | 2.01  | 0.750 |
| 1453232_at | calreticulin 3                                                          | Calr3                  | -2.26 | 0.016 | -1.39 | 0.128 | 2.14  | 0.951 | -2.49 | 0.033 | 1.06  | 0.946 |
| 1454091_at | pregnancy-specific glycoprotein 21                                      | Psg21                  | -2.27 | 0.001 | 1.05  | 0.974 | 1.11  | 0.661 | -1.03 | 0.866 | -1.24 | 0.123 |
| 1432501_at | RIKEN cDNA 1700092E16 gene                                              | 1700092E16Rik          | -2.27 | 0.010 | -1.49 | 0.162 | 1.95  | 0.307 | 1.33  | 0.406 | -1.3  | 0.090 |
| 1432210_at | RIKEN cDNA 4933401H06 gene                                              | 4933401H06Rik          | -2.28 | 0.032 | -1.32 | 0.341 | 1.25  | 0.287 | -1.23 | 0.454 | 1.14  | 0.550 |
| 1456868_at | RIKEN cDNA 2900073G15 gene                                              | 2900073G15Rik          | -2.28 | 0.031 | -1.12 | 0.494 | -1.09 | 0.671 | -2.16 | 0.018 | -1.34 | 0.157 |
| 1446663_at | Calcium/calmodulin-dependent protein kinase II, delta                   | Camk2d                 | -2.29 | 0.022 | 1.09  | 0.891 | 1.57  | 0.364 | -1.88 | 0.037 | 1.58  | 0.985 |
| 1432237_at | RIKEN cDNA 5730522E02 gene                                              | 5730522E02Rik          | -2.29 | 0.003 | -2.19 | 0.061 | 1.05  | 0.555 | -1.3  | 0.303 | -1    | 0.917 |
| 1437139_at | glycine receptor, alpha 1 subunit                                       | Glr1                   | -2.3  | 0.013 | -1.04 | 0.938 | 1.73  | 0.199 | 1.13  | 0.973 | 1.95  | 0.388 |
| 1456047_at | phospholipase A2, group IVB (cytosolic)                                 | Pla2g4b                | -2.32 | 0.004 | -1.72 | 0.108 | -1.14 | 0.417 | 1.15  | 0.546 | 1.14  | 0.919 |
| 1456183_at | oogenesis 4                                                             | Oog4                   | -2.32 | 0.031 | 1.13  | 0.662 | -1.06 | 0.625 | -1.1  | 0.549 | -1.13 | 0.459 |
| 1447632_at | Fanconi anemia, complementation group C                                 | Fancc                  | -2.32 | 0.048 | -2.45 | 0.029 | 2.92  | 0.347 | 2.93  | 0.090 | -1.01 | 0.703 |
| 1420669_at | aryl hydrocarbon receptor nuclear translocator 2                        | Arnt2                  | -2.33 | 0.001 | -1.68 | 0.102 | 2.41  | 0.037 | 1.63  | 0.329 | 1.02  | 0.946 |
| 1435367_at | mitogen-activated protein kinase 4                                      | Mapk4                  | -2.34 | 0.024 | -1.73 | 0.184 | -1.22 | 0.272 | 2.69  | 0.504 | -1.23 | 0.500 |
| 1425181_at | SH3-domain GRB2-like (endophilin) interacting protein 1                 | Sgjp1                  | -2.35 | 0.022 | 1.02  | 0.959 | 1.63  | 0.778 | 1.42  | 0.675 | 1.4   | 0.927 |
| 1422657_at | prolactin-like protein L                                                | Prlpl                  | -2.37 | 0.044 | -1.25 | 0.275 | 2.43  | 0.089 | 1.27  | 0.893 | 1.17  | 0.696 |
| 1445628_at | Rho GTPase activating protein 21                                        | Arhgap21               | -2.37 | 0.048 | 1.71  | 0.527 | 2.79  | 0.091 | 1.89  | 0.410 | -1.18 | 0.275 |
| 1431984_at | RIKEN cDNA 1700007F19 gene                                              | 1700007F19Rik          | -2.37 | 0.013 | -1.1  | 0.572 | -1.04 | 0.925 | -1.41 | 0.177 | 1.82  | 0.722 |

|              |                                                                                                                 |                       |       |       |       |       |       |       |       |       |       |       |
|--------------|-----------------------------------------------------------------------------------------------------------------|-----------------------|-------|-------|-------|-------|-------|-------|-------|-------|-------|-------|
| 1454467_at   | similar to Vinculin CG3299-PA /// similar to Vinculin CG3299-PA                                                 | LOC668894 /// LOC6714 | -2.38 | 0.039 | -1.46 | 0.211 | -1.04 | 0.842 | -1.04 | 0.641 | 1.16  | 0.930 |
| 1457478_at   | Spermatid perinuclear RNA binding protein                                                                       | Strbp                 | -2.41 | 0.039 | -1.83 | 0.010 | -1.19 | 0.358 | -1.45 | 0.130 | -1.18 | 0.311 |
| 1427346_at   | ovary testis transcribed /// similar to ovary testis transcribed /// similar to Ott /// LOC434863 /// LOC434863 |                       | -2.41 | 0.020 | 1.55  | 0.545 | 1.06  | 0.538 | -1.79 | 0.082 | 1.04  | 0.943 |
| 1450462_at   | corticotropin releasing hormone receptor 2                                                                      | Chrhr2                | -2.42 | 0.002 | 1.17  | 0.334 | 1.12  | 0.912 | 3.19  | 0.555 | 1.39  | 0.533 |
| 1423639_at   | histamine receptor H 2                                                                                          | Hrh2                  | -2.43 | 0.026 | -1.16 | 0.857 | -1.99 | 0.047 | -1.52 | 0.088 | 4.28  | 0.257 |
| 1449631_at   | Enolase 3, beta muscle                                                                                          | Eno3                  | -2.43 | 0.007 | -1.66 | 0.074 | 1.89  | 0.337 | -1.73 | 0.233 | 1.26  | 0.695 |
| 1447595_x_at | RIKEN cDNA 1810012K16 gene                                                                                      | 1810012K16Rik         | -2.43 | 0.039 | 1.27  | 0.255 | -1.34 | 0.197 | 1.74  | 0.575 | 1.67  | 0.403 |
| 1442728_at   | Nuclear autoantigenic sperm protein (histone-binding)                                                           | Nasp                  | -2.44 | 0.049 | -1.9  | 0.104 | 1.34  | 0.146 | -1.27 | 0.283 | 1.07  | 0.829 |
| 1457650_x_at | autophagy-related 4A (yeast) /// similar to Cysteine protease ATG4A (A Atg4a /// LOC666476 /// LOC666476)       |                       | -2.44 | 0.002 | -1.63 | 0.127 | 1.51  | 0.406 | -1.08 | 0.364 | 1     | 0.945 |
| 1439564_at   | RIKEN cDNA 1700090G07 gene                                                                                      | 1700090G07Rik         | -2.45 | 0.018 | -2.64 | 0.036 | -1.31 | 0.417 | 1.54  | 0.993 | -1.17 | 0.526 |
| 1440610_at   | CAS1 domain containing 1                                                                                        | Cas1                  | -2.46 | 0.035 | -1.31 | 0.392 | 1.42  | 0.276 | 1.58  | 0.108 | 1.9   | 0.725 |
| 1453910_at   | RIKEN cDNA 4930500A05 gene                                                                                      | 4930500A05Rik         | -2.47 | 0.016 | -1.99 | 0.053 | -1.31 | 0.313 | -1.18 | 0.407 | -1.01 | 0.477 |
| 1438358_x_at | prefoldin 5 /// prefoldin 5 pseudogene                                                                          | Pf1dn5 /// LOC434860  | -2.49 | 0.044 | -1.63 | 0.069 | -1.28 | 0.231 | 1.85  | 0.143 | 1.67  | 0.556 |
| 1417597_at   | CD28 antigen                                                                                                    | Cd28                  | -2.5  | 0.002 | 1.17  | 0.477 | 1.08  | 0.374 | -1.59 | 0.213 | 2.43  | 0.369 |
| 1457495_at   | RIKEN cDNA 2900052N01 gene                                                                                      | 2900052N01Rik         | -2.5  | 0.023 | -1.01 | 0.972 | 2.59  | 0.198 | 1.47  | 0.896 | 1.29  | 0.273 |
| 1431809_at   | RIKEN cDNA 4932442L08 gene                                                                                      | 4932442L08Rik         | -2.53 | 0.035 | -1.27 | 0.285 | -1.41 | 0.215 | 1.82  | 0.801 | 1.39  | 0.248 |
| 1459500_at   | expressed sequence C85351                                                                                       | C85351                | -2.54 | 0.049 | -1.47 | 0.205 | 1.42  | 0.412 | 1.61  | 0.048 | 1.49  | 0.721 |
| 1420778_at   | taste receptor, type 1, member 3                                                                                | Tas1r3                | -2.55 | 0.041 | -2.34 | 0.045 | -1.33 | 0.398 | -1.53 | 0.323 | 1.52  | 0.875 |
| 1449166_at   | S100 calcium binding protein A14                                                                                | S100a14               | -2.55 | 0.047 | -1.26 | 0.388 | 1.3   | 0.654 | -1.43 | 0.259 | 1.27  | 0.501 |
| 1454400_at   | RIKEN cDNA 4632432E15 gene                                                                                      | 4632432E15Rik         | -2.55 | 0.009 | 1.38  | 0.867 | 2.02  | 0.593 | 1.84  | 0.891 | 2.29  | 0.176 |
| 1431168_at   | Six3 opposite strand transcript 1                                                                               | Six3os1               | -2.56 | 0.026 | -2.56 | 0.090 | 1.54  | 0.430 | 1.26  | 0.742 | 1.44  | 0.907 |
| 1445567_at   | Growth associated protein 43                                                                                    | Gap43                 | -2.56 | 0.011 | -1.2  | 0.565 | 1.2   | 0.929 | 1.16  | 0.753 | -1.06 | 0.608 |
| 1455782_at   | sterile alpha motif domain containing 7                                                                         | Samd7                 | -2.57 | 0.003 | -1.67 | 0.235 | 1.66  | 0.086 | 2.03  | 0.499 | 1.48  | 0.537 |
| 1447841_x_at | ST3 beta-galactoside alpha-2,3-sialyltransferase 6                                                              | St3gal6               | -2.58 | 0.029 | -2.34 | 0.130 | 2.8   | 0.436 | 2.83  | 0.817 | -1.31 | 0.213 |
| 1428964_at   | solute carrier family 25 (mitochondrial carrier), member 18                                                     | Slc25a18              | -2.61 | 0.032 | -1.84 | 0.002 | 1.43  | 0.488 | 1.21  | 0.436 | 1.26  | 0.721 |
| 1441074_at   | Ewing sarcoma breakpoint region 1                                                                               | Ewsr1                 | -2.67 | 0.021 | -1.07 | 0.591 | -1.34 | 0.301 | 1.4   | 0.941 | -1.17 | 0.316 |
| 1439333_at   | potassium channel, subfamily V, member 1                                                                        | Kcnv1                 | -2.68 | 0.007 | -2.55 | 0.014 | 1.56  | 0.926 | 2.87  | 0.001 | 1.21  | 0.921 |
| 1443369_at   | cDNA sequence BC052055                                                                                          | BC052055              | -2.69 | 0.006 | -1.14 | 0.340 | 1.74  | 0.763 | 1.29  | 0.864 | 1.07  | 0.349 |
| 1444404_at   | RIKEN cDNA 330010C22 gene                                                                                       | D330010C22Rik         | -2.71 | 0.007 | -1.27 | 0.297 | -1.21 | 0.050 | 1.71  | 0.833 | -1.17 | 0.318 |
| 1446135_at   | RIKEN cDNA D030051J21 gene                                                                                      | D030051J21Rik         | -2.74 | 0.034 | -1.42 | 0.266 | -1.02 | 0.603 | -1.13 | 0.362 | -1.02 | 0.578 |
| 1430852_at   | RIKEN cDNA 1600029I14 gene                                                                                      | 1600029I14Rik         | -2.76 | 0.044 | -1.2  | 0.393 | 1.27  | 0.321 | -1.1  | 0.392 | 1.01  | 0.968 |
| 1458800_at   | Trinucleotide repeat containing 6C                                                                              | Tnrc6c                | -2.77 | 0.031 | 1.23  | 0.745 | 1.25  | 0.391 | 1.38  | 0.502 | 1.36  | 0.832 |
| 1422899_at   | solute carrier family 6 (neurotransmitter transporter), member 20                                               | Slc6a20               | -2.77 | 0.014 | -1.82 | 0.083 | 1.41  | 0.796 | 1.45  | 0.629 | 2.26  | 0.203 |
| 1456247_x_at | proteolipid protein 2 /// similar to Proteolipid protein 2 /// similar to Plp2 /// LOC620648 /// LOC620648      |                       | -2.78 | 0.035 | -1.4  | 0.145 | -1.01 | 0.323 | 1.79  | 0.408 | 2.5   | 0.976 |
| 1448094_at   | hypothetical LOC546100                                                                                          | LOC546100             | -2.79 | 0.026 | 1.26  | 0.981 | 2.13  | 0.480 | 2.37  | 0.840 | 1.03  | 0.685 |
| 1436901_at   | Mammary gland RCB-0526 Jyg-MC(A) cDNA, RIKEN full-length enrich Notch4                                          |                       | -2.81 | 0.041 | -1.27 | 0.233 | 1.1   | 0.442 | -1.14 | 0.672 | 1.6   | 0.414 |
| 1416098_at   | synaptogyrin 3                                                                                                  | Syngr3                | -2.9  | 0.021 | -1.6  | 0.120 | 2.06  | 0.806 | 2.92  | 0.132 | 2.51  | 0.305 |
| 1454207_at   | RIKEN cDNA C430039J16 gene                                                                                      | C430039J16Rik         | -2.91 | 0.017 | -1.06 | 0.443 | 1.29  | 0.878 | 1.45  | 0.254 | 1.02  | 0.641 |
| 1442930_at   | expressed sequence AW061147                                                                                     | AW061147              | -2.91 | 0.012 | 1.38  | 0.492 | 3.03  | 0.119 | 2.78  | 0.237 | 1.34  | 0.600 |
| 1418990_at   | membrane-spanning 4-domains, subfamily A, member 4D                                                             | Ms4a4d                | -2.94 | 0.015 | -1.06 | 0.706 | 2.24  | 0.125 | 1.81  | 0.192 | -1.06 | 0.485 |
| 1454360_at   | RIKEN cDNA 4930418C01 gene                                                                                      | 4930418C01Rik         | -2.94 | 0.006 | -1.08 | 0.673 | 2.22  | 0.014 | -1.37 | 0.153 | 1.13  | 0.579 |



|              |                                                                                               |                    |       |       |       |       |       |       |       |       |       |       |
|--------------|-----------------------------------------------------------------------------------------------|--------------------|-------|-------|-------|-------|-------|-------|-------|-------|-------|-------|
| 1425880_x_at | zinc finger protein 352                                                                       | Zfp352             | -2.99 | 0.011 | -2.2  | 0.018 | -1.35 | 0.322 | 1.44  | 0.564 | 2.24  | 0.915 |
| 1430506_at   | RIKEN cDNA 8430406P12 gene                                                                    | 8430406P12Rik      | -2.99 | 0.014 | -1.29 | 0.458 | 1.46  | 0.535 | 1.06  | 0.864 | -1.13 | 0.414 |
| 1440094_at   | cDNA sequence BC030870                                                                        | BC030870           | -3.07 | 0.021 | -2.84 | 0.018 | 1.96  | 0.528 | 2.1   | 0.698 | -1.54 | 0.151 |
| 1442950_at   | Neuregulin 3                                                                                  | Nrg3               | -3.11 | 0.004 | -1.54 | 0.123 | 1.43  | 0.406 | 1.71  | 0.278 | -1.29 | 0.396 |
| 1431534_at   | protein kinase C and casein kinase substrate in neurons 3                                     | Pacsin3            | -3.16 | 0.037 | -1.71 | 0.184 | 2.37  | 0.122 | -1.27 | 0.352 | -1.16 | 0.542 |
| 1435217_at   | hypothetical protein LOC666185 /// hypothetical protein LOC666222 /// LOC666185 /// LOC666222 |                    | -3.21 | 0.048 | -1.03 | 0.717 | 1.03  | 0.338 | 2.6   | 0.103 | 2.16  | 0.392 |
| 1453408_s_at | RIKEN cDNA 4930519G04 gene                                                                    | 4930519G04Rik      | -3.26 | 0.037 | -1.79 | 0.161 | 1.35  | 0.778 | -1.32 | 0.173 | 1.17  | 0.955 |
| 1457912_at   | RIKEN cDNA E130317F20 gene                                                                    | E130317F20Rik      | -3.29 | 0.002 | -1.3  | 0.240 | 1.09  | 0.574 | 1.02  | 0.757 | 2.48  | 0.294 |
| 1427761_at   | prion protein interacting protein 1                                                           | Prmpip1            | -3.31 | 0.031 | -1.5  | 0.241 | 1.92  | 0.516 | 2.06  | 0.287 | 1.41  | 0.804 |
| 1459971_at   | Potassium channel, subfamily T, member 2                                                      | Kcnt2              | -3.31 | 0.007 | -3.11 | 0.014 | 1.36  | 0.980 | 1.02  | 0.837 | 1.6   | 0.953 |
| 1434553_at   | transmembrane protein 56                                                                      | Tmem56             | -3.32 | 0.042 | -1.96 | 0.147 | 1.19  | 0.873 | 2.05  | 0.667 | 2.02  | 0.145 |
| 1419724_at   | ectodysplasin-A receptor /// similar to Tumor necrosis factor receptor s1                     | Edar /// LOC669001 | -3.33 | 0.021 | -2.56 | 0.045 | 1.54  | 0.985 | 2.9   | 0.360 | -1.47 | 0.251 |
| 1439395_at   | RIKEN cDNA 9630025I21 gene                                                                    | 9630025I21Rik      | -3.35 | 0.013 | -2.25 | 0.122 | -1.05 | 0.916 | 1.94  | 0.502 | -1.11 | 0.359 |
| 1438103_at   | protocadherin gamma subfamily C, 4                                                            | Pcdhgc4            | -3.53 | 0.031 | -2.22 | 0.114 | -1.13 | 0.661 | 2.19  | 0.360 | 1.32  | 0.648 |
| 1431544_at   | RIKEN cDNA 4930524B17 gene                                                                    | 4930524B17Rik      | -3.59 | 0.004 | -1.41 | 0.128 | -2.78 | 0.047 | 1.33  | 0.410 | 2.67  | 0.231 |
| 1443754_x_at | Limbic system-associated membrane protein                                                     | Lsamp              | -3.62 | 0.020 | -2.48 | 0.073 | 4.05  | 0.563 | 1.76  | 0.612 | 3.77  | 0.528 |
| 1438122_at   | RIKEN cDNA 2900006K08 gene                                                                    | 2900006K08Rik      | -3.67 | 0.011 | -1.16 | 0.571 | 1.31  | 0.574 | 1.2   | 0.757 | 1.75  | 0.897 |
| 1437418_at   | ---                                                                                           | ---                | -4.73 | 0.004 | -2.04 | 0.090 | 1.42  | 0.659 | 1.97  | 0.442 | -1.72 | 0.196 |

**Supplementary table 2. List of significant expression profiles of wt cells irradiated with 4J/m2 of UV (gray color) as compared to non-irradiated wt controls**

| code         | Gene Title                                                         | Symbol                | WT_0.6J/m2 | p     | WT_4J/m2 | p     | XPA_0.6J/m2 | p     | CSB_0.6J/m2 | p     | DKO_0.6J/m2 | p     |
|--------------|--------------------------------------------------------------------|-----------------------|------------|-------|----------|-------|-------------|-------|-------------|-------|-------------|-------|
| 1452552_at   | neoplastic progression 2                                           | Npn2                  | 2.01       | 0.566 | 11.69    | 0.000 | 3.34        | 0.102 | 7.33        | 0.002 | 3.96        | 0.024 |
| 1425416_s_at | proline/serine-rich coiled-coil 1                                  | Psrc1                 | 10.17      | 0.325 | 11.29    | 0.047 | 1.12        | 0.074 | 1.29        | 0.085 | 1.28        | 0.110 |
| 1452688_at   | PRP39 pre-mRNA processing factor 39 homolog (yeast)                | Prpf39                | 4.65       | 0.318 | 9.19     | 0.047 | -1.09       | 0.631 | 1.17        | 0.132 | 1.06        | 0.796 |
| 1453760_at   | mesoderm induction early response 1 homolog (Xenopus lae           | Mier1                 | 6.25       | 0.141 | 6.63     | 0.049 | -1          | 0.929 | 1.01        | 0.868 | 1.09        | 0.830 |
| 1434959_at   | desert hedgehog                                                    | Dhh                   | 4.8        | 0.197 | 6.62     | 0.001 | 1.18        | 0.743 | 2.39        | 0.578 | 1.49        | 0.546 |
| 1432538_a_at | replication factor C (activator 1) 3                               | Rfc3                  | 4.97       | 0.204 | 6.5      | 0.028 | 1.34        | 0.099 | 1.32        | 0.025 | 1.24        | 0.015 |
| 1424997_at   | splicing factor, arginine/serine-rich 8                            | Sfrs8                 | 6.48       | 0.122 | 6.27     | 0.045 | 1.32        | 0.410 | 1.11        | 0.562 | 1           | 0.767 |
| 1419234_at   | helicase (DNA) B                                                   | Helb                  | 4.19       | 0.085 | 6.26     | 0.025 | 1.47        | 0.031 | 1.31        | 0.058 | 1.28        | 0.386 |
| 1422292_at   | RIKEN cDNA A030005K14 gene                                         | A030005K14Rik         | 1.74       | 0.011 | 5.95     | 0.044 | 1.37        | 0.757 | 1.52        | 0.808 | 1.73        | 0.258 |
| 1429419_at   | RIKEN cDNA 2310007A19 gene                                         | 2310007A19Rik         | 3.35       | 0.302 | 5.57     | 0.020 | 1.23        | 0.777 | -1.02       | 0.501 | 2.7         | 0.504 |
| 1428784_at   | Gem-interacting protein                                            | Gmip                  | 3.92       | 0.098 | 5.26     | 0.008 | -1.04       | 0.741 | 1.58        | 0.163 | 1.2         | 0.180 |
| 1435373_at   | casein kinase 1, epsilon                                           | Csnk1e                | 5.06       | 0.217 | 5.22     | 0.045 | -1.21       | 0.228 | -1.25       | 0.082 | 1.11        | 0.680 |
| 1455241_at   | cDNA sequence BC037703                                             | BC037703              | 2.34       | 0.138 | 5.04     | 0.010 | 2.02        | 0.020 | 2.05        | 0.205 | 1.73        | 0.163 |
| 1454011_a_at | replication protein A2                                             | Rpa2                  | 4.17       | 0.273 | 4.99     | 0.007 | 1.09        | 0.455 | 1.3         | 0.013 | 1.13        | 0.222 |
| 1454857_at   | ring finger protein 122                                            | Rnf122                | 3          | 0.333 | 4.85     | 0.042 | 1.39        | 0.024 | 1.58        | 0.034 | 1.83        | 0.017 |
| 1426062_a_at | caspase 7                                                          | Casp7                 | 5.88       | 0.227 | 4.83     | 0.026 | 4.19        | 0.126 | 1.03        | 0.898 | 1.25        | 0.543 |
| 1460007_at   | thymocyte nuclear protein 1                                        | Thyn1                 | 5.82       | 0.231 | 4.81     | 0.037 | 1.5         | 0.207 | 2.84        | 0.077 | 1.59        | 0.434 |
| 1432294_at   | RIKEN cDNA 9330177L23 gene                                         | 9330177L23Rik         | 3.04       | 0.193 | 4.75     | 0.035 | 2.39        | 0.858 | 1.59        | 0.719 | 1.45        | 0.662 |
| 1446979_at   | Decapping enzyme, scavenger                                        | Dcps                  | 3.96       | 0.054 | 4.69     | 0.001 | 2.27        | 0.423 | 2.03        | 0.992 | 2.41        | 0.759 |
| 1444700_at   | Neurexin III                                                       | Nrxn3                 | 2.28       | 0.039 | 4.69     | 0.005 | 2.17        | 0.944 | 2.37        | 0.304 | -1.01       | 0.438 |
| 1453567_s_at | RIKEN cDNA 2810441K11 gene                                         | 2810441K11Rik         | 4.22       | 0.295 | 4.68     | 0.037 | 1.25        | 0.059 | 1.1         | 0.400 | 1.12        | 0.625 |
| 1438448_at   | otopetrin 1                                                        | Otop1                 | 2.58       | 0.444 | 4.66     | 0.018 | -1.24       | 0.230 | -1.18       | 0.368 | 1.83        | 0.402 |
| 1418069_at   | apolipoprotein C-II                                                | Apoc2                 | 4.9        | 0.162 | 4.54     | 0.041 | -1.24       | 0.130 | 4.1         | 0.221 | 2.04        | 0.443 |
| 1424680_at   | expressed sequence BB146404                                        | BB146404              | 3.41       | 0.132 | 4.51     | 0.024 | 1.68        | 0.010 | 1.18        | 0.191 | 1.16        | 0.042 |
| 1447253_x_at | nucleoporin 54                                                     | Nup54                 | 1.73       | 0.922 | 4.44     | 0.048 | 1.24        | 0.671 | 1.26        | 0.007 | -1.14       | 0.709 |
| 1425990_a_at | nuclear factor of activated T-cells, cytoplasmic, calcineurin-d    | Nfatc2                | 3.95       | 0.018 | 4.4      | 0.033 | -1.08       | 0.457 | -1.05       | 0.590 | -1.35       | 0.304 |
| 1449293_a_at | S-phase kinase-associated protein 2 (p45)                          | Skp2                  | 3.54       | 0.088 | 4.4      | 0.022 | 1.25        | 0.260 | 1.51        | 0.048 | 1.25        | 0.224 |
| 1433586_at   | RGM domain family, member B                                        | Rgmb                  | 4.42       | 0.408 | 4.34     | 0.047 | 1.16        | 0.079 | 1.18        | 0.217 | 1.39        | 0.064 |
| 1451751_at   | DNA-damage-inducible transcript 4-like                             | Ddit4l                | 1.6        | 0.390 | 4.33     | 0.002 | 1.72        | 0.231 | 1.33        | 0.161 | 1.31        | 0.326 |
| 1422979_at   | suppressor of variegation 3-9 homolog 2 (Drosophila)               | Suv39h2               | 3.4        | 0.061 | 4.32     | 0.003 | 1.2         | 0.422 | 1.43        | 0.354 | 1.13        | 0.972 |
| 1460521_a_at | RIKEN cDNA 5830411E10 gene                                         | 5830411E10Rik         | 3.24       | 0.308 | 4.28     | 0.012 | 1.06        | 0.258 | 1.26        | 0.060 | 1.27        | 0.353 |
| 1421706_at   | matrix metalloproteinase 20 (enamelysin)                           | Mmp20                 | 1.27       | 0.426 | 4.23     | 0.035 | -1.6        | 0.181 | 3.41        | 0.079 | 1.3         | 0.457 |
| 1451949_at   | immunoglobulin heavy chain 4 (serum IgG1) /// immunoglobu          | Igh-4 /// Igh-6 /// I | 2.02       | 0.640 | 4.22     | 0.039 | -1.05       | 0.627 | 1.06        | 0.481 | 1.23        | 0.406 |
| 1422552_at   | represso, TP53 dependent G2 arrest mediator candidate              | Rprm                  | 1.6        | 0.294 | 4.18     | 0.007 | 1.31        | 0.022 | 1.36        | 0.042 | 2.34        | 0.011 |
| 1452990_at   | metal response element binding transcription factor 1              | Mtf1                  | 2.21       | 0.125 | 4.16     | 0.050 | -1.09       | 0.681 | 1.63        | 0.766 | 1.05        | 0.797 |
| 1427316_s_at | EST AA881470                                                       | AA881470              | 4.88       | 0.520 | 4.1      | 0.027 | 1.11        | 0.547 | 1.13        | 0.108 | 1.19        | 0.061 |
| 1440645_at   | similar to deleted in malignant brain tumors 1 isoform c precu     | LOC546006             | 2.29       | 0.046 | 4.08     | 0.018 | 2.49        | 0.340 | -1.05       | 0.328 | -2.48       | 0.015 |
| 1430026_at   | stress 70 protein chaperone, microsome-associated, human l         | Stch                  | 5.91       | 0.067 | 4.06     | 0.044 | -1.09       | 0.408 | 1.18        | 0.411 | 1.3         | 0.233 |
| 1416774_at   | wee 1 homolog (S. pombe)                                           | Wee1                  | 3.75       | 0.208 | 4.03     | 0.037 | -1.12       | 0.172 | 1.29        | 0.085 | 1.23        | 0.300 |
| 1446749_at   | kinectin 1                                                         | Ktn1                  | 2.15       | 0.529 | 4.02     | 0.027 | -1.07       | 0.543 | -1.63       | 0.186 | -1.26       | 0.249 |
| 1431197_at   | ADP-ribosylation factor-like 6 interacting protein 2               | Arl6ip2               | 4.23       | 0.260 | 3.95     | 0.024 | 1.07        | 0.335 | 1.16        | 0.647 | -1.12       | 0.431 |
| 1451635_at   | RIKEN cDNA D630002G06 gene /// RIKEN cDNA C730048C D630002G06Rik / |                       | 1.86       | 0.302 | 3.95     | 0.018 | -1.55       | 0.137 | 1.17        | 0.303 | -1.05       | 0.445 |
| 1451800_at   | GRIP and coiled-coil domain containing 2                           | Gcc2                  | 3.08       | 0.001 | 3.94     | 0.007 | 1.16        | 0.810 | 1.17        | 0.792 | 1.26        | 0.928 |
| 1453500_at   | cytochrome P450, family 2, subfamily u, polypeptide 1              | Cyp2u1                | 2.51       | 0.305 | 3.85     | 0.038 | 1.05        | 0.805 | 1.57        | 0.095 | 1.61        | 0.030 |
| 1455903_at   | TBC1 domain family, member 4                                       | Tbc1d4                | 1.12       | 0.792 | 3.84     | 0.010 | 1.05        | 0.682 | 1.64        | 0.295 | -1.08       | 0.261 |
| 1423229_at   | inositol polyphosphate-5-phosphatase E                             | Inpp5e                | 3.39       | 0.335 | 3.83     | 0.019 | 1.17        | 0.549 | 1.41        | 0.061 | 1.42        | 0.002 |
| 1424229_at   | dual-specificity tyrosine-(Y)-phosphorylation regulated kinase     | Dyrk3                 | 2.16       | 0.096 | 3.82     | 0.004 | 1.72        | 0.023 | 1.43        | 0.038 | 1.89        | 0.003 |
| 1449589_x_at | RIKEN cDNA 2610020O08 gene                                         | 2610020O08Rik         | 2.82       | 0.371 | 3.8      | 0.024 | 1.09        | 0.724 | 1.38        | 0.484 | 1.15        | 0.449 |
| 1426734_at   | cDNA sequence BC022623                                             | BC022623              | 3.84       | 0.469 | 3.79     | 0.002 | 1.24        | 0.172 | 1.47        | 0.066 | 1.7         | 0.024 |
| 1427401_at   | cholinergic receptor, nicotinic, alpha polypeptide 5               | Chrna5                | 1.12       | 0.300 | 3.75     | 0.025 | 1.73        | 0.932 | 1.04        | 0.679 | 1.1         | 0.802 |
| 1421663_at   | dehydrogenase/reductase member 2                                   | Dhrs2                 | 3.1        | 0.039 | 3.75     | 0.046 | -1.12       | 0.384 | -1.15       | 0.225 | 2.13        | 0.713 |
| 1443264_at   | membrane-spanning 4-domains, subfamily A, member 2                 | Ms4a2                 | 1.47       | 0.535 | 3.75     | 0.045 | 1.43        | 0.514 | 1.32        | 0.601 | 1.59        | 0.068 |
| 1433452_at   | RIKEN cDNA B630019K06 gene                                         | B630019K06Rik         | 2.92       | 0.088 | 3.74     | 0.035 | 1.47        | 0.084 | 1.35        | 0.033 | 1.06        | 0.660 |

|              |                                                                          |                   |       |       |      |       |       |       |       |       |       |       |
|--------------|--------------------------------------------------------------------------|-------------------|-------|-------|------|-------|-------|-------|-------|-------|-------|-------|
| 1433583_at   | zinc finger protein 365 /// similar to zinc finger protein 365           | Zfp365 /// LOC674 | 2.05  | 0.133 | 3.74 | 0.010 | 1.29  | 0.261 | 1.15  | 0.054 | 1.48  | 0.028 |
| 1431270_a_at | asteroid homolog 1 (Drosophila)                                          | Aste1             | 3.42  | 0.452 | 3.72 | 0.023 | 1.3   | 0.203 | 1.32  | 0.158 | 1.31  | 0.108 |
| 1444226_at   | forkhead box O3a                                                         | Foxo3a            | 1.43  | 0.216 | 3.71 | 0.037 | 1.6   | 0.802 | 1.18  | 0.355 | 2.25  | 0.253 |
| 1424772_at   | H2A histone family, member J /// similar to H2A histone family, member J | H2afj /// LOC6324 | 2.52  | 0.510 | 3.71 | 0.037 | 1.71  | 0.057 | 1.47  | 0.045 | 1.52  | 0.113 |
| 1444341_at   | RIKEN cDNA 8030451F13 gene                                               | 8030451F13Rik     | 1.26  | 0.983 | 3.69 | 0.022 | -1.98 | 0.033 | 1.22  | 0.611 | 1.22  | 0.990 |
| 1422177_at   | interleukin 13 receptor, alpha 2                                         | Il13ra2           | 3.7   | 0.046 | 3.68 | 0.027 | 1.37  | 0.724 | 2.26  | 0.526 | 2.07  | 0.052 |
| 1443401_at   | Astrotactin 2                                                            | Astn2             | 1.12  | 0.964 | 3.64 | 0.041 | 1.05  | 0.991 | 1.01  | 0.635 | 2.01  | 0.106 |
| 1453732_at   | RIKEN cDNA 6230416A05 gene                                               | 6230416A05Rik     | 2.71  | 0.293 | 3.6  | 0.002 | 1.21  | 0.690 | 1.47  | 0.113 | 1.27  | 0.654 |
| 1422681_at   | Ctr9, Paf1/RNA polymerase II complex component, homolog                  | Ctr9              | 2.47  | 0.514 | 3.56 | 0.050 | 1.06  | 0.743 | 1.27  | 0.161 | 1.11  | 0.299 |
| 1432012_a_at | NOL1/NOP2/Sun domain family 6                                            | Nsun6             | 3.27  | 0.017 | 3.56 | 0.020 | 1.36  | 0.583 | 1.35  | 0.022 | -1.24 | 0.038 |
| 1417000_at   | ankyrin repeat and BTB (POZ) domain containing 1                         | Abtb1             | 4.61  | 0.036 | 3.54 | 0.007 | -1.44 | 0.121 | -1.23 | 0.140 | 1.4   | 0.215 |
| 1451417_at   | breast cancer 1                                                          | Brca1             | 2.74  | 0.301 | 3.54 | 0.043 | 1.17  | 0.843 | 1.12  | 0.118 | 1.15  | 0.710 |
| 1421790_a_at | potassium voltage-gated channel, shaker-related subfamily, t             | Kcnab3            | 2.53  | 0.330 | 3.53 | 0.009 | 2.46  | 0.155 | 1.24  | 0.402 | 1.16  | 0.202 |
| 1438942_x_at | transglutaminase 2, C polypeptide                                        | Tgm2              | -1.58 | 0.136 | 3.53 | 0.033 | -1.28 | 0.210 | 1.54  | 0.851 | -1.37 | 0.301 |
| 1453422_a_at | RIKEN cDNA 1110020G09 gene                                               | 1110020G09Rik     | 4.08  | 0.191 | 3.49 | 0.014 | 1.48  | 0.033 | 1.23  | 0.166 | 1.16  | 0.244 |
| 1421487_a_at | non-catalytic region of tyrosine kinase adaptor protein 1                | Nck1              | 3.33  | 0.259 | 3.47 | 0.047 | -1    | 0.868 | 1.13  | 0.082 | 1     | 0.823 |
| 1416016_at   | transporter 1, ATP-binding cassette, sub-family B (MDR/TAP)              | Tap1              | 2.37  | 0.257 | 3.46 | 0.017 | 2.76  | 0.091 | -1.03 | 0.629 | 1.32  | 0.260 |
| 1443770_x_at | Autism susceptibility candidate 2                                        | Auts2             | 2.83  | 0.324 | 3.45 | 0.048 | 2.8   | 0.035 | 2.2   | 0.150 | 1.5   | 0.212 |
| 1458152_at   | electron transferring flavoprotein, dehydrogenase                        | Etfdh             | 1.33  | 0.720 | 3.45 | 0.008 | 3.18  | 0.102 | 1.61  | 0.519 | -1.2  | 0.369 |
| 1426988_at   | kelch domain containing 5                                                | Klhdc5            | 3.69  | 0.376 | 3.44 | 0.015 | 1.28  | 0.000 | 1.25  | 0.134 | 1.48  | 0.012 |
| 1417898_a_at | granzyme A                                                               | Gzma              | 2.12  | 0.288 | 3.43 | 0.037 | 1.66  | 0.652 | 1.84  | 0.511 | -1.9  | 0.083 |
| 1435830_a_at | RIKEN cDNA 5430435G22 gene                                               | 5430435G22Rik     | 2.17  | 0.961 | 3.42 | 0.008 | 1.29  | 0.070 | 1.03  | 0.822 | 1.34  | 0.298 |
| 1456773_at   | nucleoporin like 2                                                       | Nupl2             | 2.27  | 0.174 | 3.41 | 0.035 | -1.03 | 0.628 | 1.25  | 0.256 | 1.23  | 0.540 |
| 1436593_at   | RIKEN cDNA 1700016K19 gene                                               | 1700016K19Rik     | 1.67  | 0.544 | 3.4  | 0.034 | 2.4   | 0.177 | 1.26  | 0.129 | 1.74  | 0.042 |
| 1446870_at   | DNA segment, Chr 4, ERATO Doi 510, expressed                             | D4Erd510e         | 1.4   | 0.268 | 3.38 | 0.027 | 1.02  | 0.513 | -1.58 | 0.101 | 1.07  | 0.645 |
| 1453713_s_at | RIKEN cDNA 4930546H06 gene                                               | 4930546H06Rik     | 1.45  | 0.362 | 3.37 | 0.048 | 1.38  | 0.441 | 1.61  | 0.271 | 2.74  | 0.449 |
| 1426412_at   | neurogenic differentiation 1                                             | Neurod1           | 2.23  | 0.471 | 3.34 | 0.006 | -2.09 | 0.004 | 1.26  | 0.839 | -2.11 | 0.049 |
| 1420584_at   | phospholipase A2, group IIC                                              | Pla2g2c           | 2.9   | 0.173 | 3.33 | 0.005 | 1.14  | 0.789 | -1.29 | 0.249 | -1.07 | 0.533 |
| 1459297_at   | CDC91 cell division cycle 91-like 1 (S. cerevisiae)                      | Cdc91l1           | 2.34  | 0.870 | 3.32 | 0.030 | 2.42  | 0.239 | 2.44  | 0.272 | 1.87  | 0.404 |
| 1436020_at   | DNA segment, Chr 8, ERATO Doi 457, expressed                             | D8Erd457e         | 2.6   | 0.272 | 3.31 | 0.034 | 1.11  | 0.204 | 1.21  | 0.056 | 1.12  | 0.306 |
| 1435404_at   | dispatched homolog 2 (Drosophila)                                        | Disp2             | 2.37  | 0.061 | 3.3  | 0.002 | 2.2   | 0.265 | -1.7  | 0.033 | 1.21  | 0.473 |
| 1440946_at   | Zinc finger protein 483                                                  | Zfp483            | 1.21  | 0.637 | 3.29 | 0.032 | 2.03  | 0.250 | 1.64  | 0.607 | -1.36 | 0.184 |
| 1442032_at   | cDNA sequence BC030500                                                   | BC030500          | 1.09  | 0.571 | 3.28 | 0.034 | -1.14 | 0.312 | 1.05  | 0.321 | 1.18  | 0.530 |
| 1425220_x_at | cDNA sequence AF067061 /// hypothetical protein LOC6399:                 | AF067061 /// LOC  | 2.15  | 0.275 | 3.27 | 0.031 | 1.23  | 0.478 | 1.75  | 0.204 | 1.19  | 0.402 |
| 1420730_a_at | t-complex protein 11                                                     | Tcp11             | 2.96  | 0.121 | 3.27 | 0.036 | -1.07 | 0.844 | -1.05 | 0.874 | 1.49  | 0.573 |
| 1447185_at   | RIKEN cDNA 9330158H04 gene                                               | 9330158H04Rik     | 1.25  | 0.515 | 3.26 | 0.048 | 1.06  | 0.984 | 2.34  | 0.599 | -1.06 | 0.214 |
| 1456643_at   | RIKEN cDNA 9230114K14 gene                                               | 9230114K14Rik     | 1.79  | 0.015 | 3.25 | 0.006 | 1.22  | 0.409 | 1.12  | 0.323 | 1.34  | 0.003 |
| 1430572_at   | RIKEN cDNA 1810042K04 gene                                               | 1810042K04Rik     | -1.07 | 0.474 | 3.24 | 0.002 | -1.65 | 0.100 | -1.05 | 0.290 | 2.4   | 0.319 |
| 1439725_at   | protein tyrosine phosphatase, receptor type, T                           | Ptprt             | 2.85  | 0.373 | 3.21 | 0.037 | 1.47  | 0.541 | 1.17  | 0.733 | 2.86  | 0.275 |
| 1440600_at   | RIKEN cDNA 4930407I10 gene                                               | 4930407I10Rik     | 3.61  | 0.052 | 3.19 | 0.016 | -1.16 | 0.394 | 2.28  | 0.512 | -1.72 | 0.107 |
| 1454055_at   | RIKEN cDNA 1600029O15 gene                                               | 1600029O15Rik     | 1.94  | 0.367 | 3.18 | 0.002 | -1.36 | 0.026 | -1.67 | 0.123 | 3.02  | 0.062 |
| 1443036_at   | RIKEN cDNA C630007C17 gene                                               | C630007C17Rik     | 1.38  | 0.782 | 3.18 | 0.009 | 1.12  | 0.548 | 1.09  | 0.886 | 1.19  | 0.878 |
| 1445523_at   | Gap junction membrane channel protein epsilon 1                          | Gje1              | 3.17  | 0.086 | 3.18 | 0.015 | 1.57  | 0.805 | 1.11  | 0.759 | -1.05 | 0.669 |
| 1457377_at   | L(3)mbt-like 3 (Drosophila)                                              | L3mbtl3           | 1.17  | 0.873 | 3.17 | 0.024 | -1.36 | 0.204 | -1.09 | 0.606 | -1.36 | 0.040 |
| 1441963_at   | ProSAPiP1 protein                                                        | Prosapip1         | 2.13  | 0.604 | 3.17 | 0.009 | 1.85  | 0.003 | 1.43  | 0.135 | 1.5   | 0.167 |
| 1430468_at   | RIKEN cDNA 2810449G22 gene                                               | 2810449G22Rik     | 2.18  | 0.291 | 3.15 | 0.005 | 1.1   | 0.735 | -1.17 | 0.310 | 1.44  | 0.599 |
| 1452407_at   | sperm associated antigen 4                                               | Spag4             | 1.67  | 0.201 | 3.15 | 0.046 | 2.05  | 0.220 | -1.14 | 0.346 | 2.94  | 0.462 |
| 1421397_a_at | leucine-rich and death domain containing                                 | Lrdd              | 1.6   | 0.518 | 3.14 | 0.006 | 1.22  | 0.500 | 1.46  | 0.059 | 1.45  | 0.405 |
| 1427565_a_at | ATP-binding cassette, sub-family C (CFTR/MRP), member 5                  | Abcc5             | 4.46  | 0.236 | 3.13 | 0.041 | 1.31  | 0.545 | -1.24 | 0.033 | -1.04 | 0.748 |
| 1438837_at   | Cholinergic receptor, nicotinic, alpha polypeptide 9                     | Chrna9            | 1.47  | 0.439 | 3.13 | 0.001 | 1.36  | 0.394 | 1.16  | 0.906 | 1.13  | 0.588 |
| 1447497_at   | RAB21, member RAS oncogene family                                        | Rab21             | 2.72  | 0.628 | 3.12 | 0.015 | -1.02 | 0.656 | 1.79  | 0.575 | -1.22 | 0.661 |
| 1428805_at   | solute carrier family 35, member E3                                      | Slc35e3           | 1.93  | 0.233 | 3.11 | 0.012 | 1.18  | 0.069 | 1.35  | 0.006 | 1.52  | 0.003 |
| 1438350_at   | G protein-coupled receptor 64                                            | Gpr64             | 3.38  | 0.167 | 3.1  | 0.025 | 1.68  | 0.224 | -1.25 | 0.187 | -2.88 | 0.031 |
| 1449894_at   | leucine rich repeat containing 18                                        | Lrrc18            | 2.15  | 0.199 | 3.1  | 0.008 | 1.16  | 0.694 | 1.59  | 0.344 | 1.73  | 0.968 |
| 1453380_a_at | XRCC6 binding protein 1                                                  | Xrcc6bp1          | 2.05  | 0.391 | 3.09 | 0.005 | 1.38  | 0.242 | 1.47  | 0.066 | 1.28  | 0.152 |
| 1445680_x_at | coagulation factor II (thrombin) receptor-like 2                         | F2rl2             | 1.84  | 0.495 | 3.08 | 0.042 | 1.58  | 0.526 | 1.28  | 0.620 | 3.74  | 0.068 |
| 1417876_at   | Fc receptor, IgG, high affinity I                                        | Fcgr1             | 2.38  | 0.067 | 3.06 | 0.032 | -1.29 | 0.380 | 1.35  | 0.364 | 1.24  | 0.927 |
| 1423944_at   | hemopexin                                                                | Hpxn              | 2.49  | 0.183 | 3.05 | 0.021 | 2.7   | 0.344 | 3.12  | 0.645 | 1.8   | 0.545 |

|              |                                                                                     |               |       |       |      |       |       |       |       |       |       |       |
|--------------|-------------------------------------------------------------------------------------|---------------|-------|-------|------|-------|-------|-------|-------|-------|-------|-------|
| 1438140_a_at | zinc finger protein 64                                                              | Zfp64         | 2.73  | 0.600 | 3.05 | 0.038 | 1.12  | 0.454 | 1.21  | 0.353 | 1.12  | 0.631 |
| 1441122_at   | expressed sequence AU024342                                                         | AU024342      | 1.94  | 0.031 | 3.04 | 0.037 | 2.2   | 0.289 | 1.85  | 0.133 | -1.01 | 0.486 |
| 1449654_s_at | expressed sequence C77545                                                           | C77545        | 1.59  | 0.225 | 3.03 | 0.001 | 2.04  | 0.430 | 1.27  | 0.616 | 1.6   | 0.382 |
| 1440729_at   | epidermal growth factor receptor pathway substrate 15                               | Eps15         | 2.47  | 0.527 | 3.03 | 0.020 | -1.45 | 0.179 | 1.16  | 0.937 | 1.1   | 0.720 |
| 1421435_at   | glutamate receptor, ionotropic, delta 2                                             | Grid2         | 2.32  | 0.004 | 3.03 | 0.001 | 1.61  | 0.698 | -1.11 | 0.636 | -1.34 | 0.315 |
| 1431624_a_at | RIKEN cDNA 2610206B13 gene                                                          | 2610206B13Rik | 1.58  | 0.292 | 3.02 | 0.018 | 2.2   | 0.036 | 1.83  | 0.547 | -1.05 | 0.980 |
| 1434259_at   | similar to H2A histone family, member J                                             | LOC666811     | 1.04  | 0.794 | 3.02 | 0.030 | -1.2  | 0.350 | -1.91 | 0.095 | 2.88  | 0.950 |
| 1442603_at   | Polybromo 1                                                                         | Pb1           | 2.55  | 0.020 | 2.99 | 0.036 | -1.33 | 0.259 | -1.11 | 0.598 | -1.53 | 0.028 |
| 1443994_at   | RIKEN cDNA 6030407O03 gene                                                          | 6030407O03Rik | 2     | 0.409 | 2.98 | 0.003 | 1.27  | 0.325 | -1.49 | 0.121 | -1.42 | 0.182 |
| 1428994_s_at | RIKEN cDNA 1110017116 gene                                                          | 1110017116Rik | 1.2   | 0.921 | 2.97 | 0.012 | 1.33  | 0.460 | -1.77 | 0.070 | -1.45 | 0.158 |
| 1430204_at   | RIKEN cDNA 5033425G24 gene                                                          | 5033425G24Rik | 1.66  | 0.248 | 2.97 | 0.011 | -1.09 | 0.422 | 1.44  | 0.114 | 1.13  | 0.693 |
| 1446805_at   | Gamma-aminobutyric acid (GABA-A) receptor, subunit alpha                            | Gabra2        | 3.15  | 0.113 | 2.97 | 0.046 | 1.13  | 0.828 | 1.25  | 0.578 | -1.09 | 0.343 |
| 1433877_at   | RIKEN cDNA 4732473B16 gene                                                          | 4732473B16Rik | 2.16  | 0.396 | 2.96 | 0.019 | 1.17  | 0.106 | 1.19  | 0.216 | 1.53  | 0.025 |
| 1416927_at   | transformation related protein 53 inducible nuclear protein 1                       | Trp53inp1     | 1.13  | 0.060 | 2.95 | 0.006 | 1.08  | 0.814 | 1.78  | 0.138 | 1.83  | 0.253 |
| 1460089_at   | Period homolog 3 (Drosophila)                                                       | Per3          | 2.17  | 0.227 | 2.94 | 0.006 | 1.11  | 0.560 | 1.82  | 0.461 | 3.15  | 0.066 |
| 1449350_at   | odd-skipped related 1 (Drosophila)                                                  | Osr1          | 2.84  | 0.116 | 2.92 | 0.005 | 1.01  | 0.909 | 1.21  | 0.500 | -1.18 | 0.214 |
| 1449578_at   | suppressor of Ty 16 homolog (S. cerevisiae)                                         | Supt16h       | 3.86  | 0.130 | 2.9  | 0.006 | 1.56  | 0.243 | 1.27  | 0.354 | 1.15  | 0.321 |
| 1431000_at   | RIKEN cDNA 2310002B06 gene                                                          | 2310002B06Rik | 1.13  | 0.999 | 2.89 | 0.047 | -1.21 | 0.078 | -1.27 | 0.198 | 1.11  | 0.762 |
| 1415843_at   | G protein beta subunit-like                                                         | Gbl           | 3.13  | 0.164 | 2.89 | 0.034 | -1.17 | 0.286 | 1.44  | 0.114 | 1.26  | 0.098 |
| 1446189_at   | MYST histone acetyltransferase monocytic leukemia 4                                 | Myst4         | -1.23 | 0.350 | 2.89 | 0.027 | 1.5   | 0.687 | 1.15  | 0.536 | 1.45  | 0.874 |
| 1423231_at   | neurogranin                                                                         | Nrgn          | 2     | 0.527 | 2.88 | 0.009 | 1.52  | 0.006 | 2.04  | 0.850 | -1.18 | 0.803 |
| 1432787_at   | RIKEN cDNA 6720420G18 gene                                                          | 6720420G18Rik | 2     | 0.234 | 2.87 | 0.045 | 1.06  | 0.778 | 1.16  | 0.866 | -1.27 | 0.278 |
| 1426117_a_at | solute carrier family 19 (thiamine transporter), member 2                           | Slc19a2       | 2.2   | 0.167 | 2.86 | 0.004 | 1.76  | 0.025 | 1.53  | 0.131 | 1.32  | 0.405 |
| 1418203_at   | phorbol-12-myristate-13-acetate-induced protein 1                                   | Pmaip1        | 1.33  | 0.093 | 2.85 | 0.020 | 1.42  | 0.015 | 1.22  | 0.008 | 1.68  | 0.090 |
| 1440546_at   | RIKEN cDNA 9630002D21 gene                                                          | 9630002D21Rik | 2.64  | 0.111 | 2.84 | 0.033 | 2.98  | 0.940 | 1.94  | 0.206 | 1.04  | 0.897 |
| 1436472_at   | schlafen 9                                                                          | Slf9          | 2.6   | 0.550 | 2.84 | 0.041 | 1.1   | 0.795 | 1.25  | 0.879 | 2.25  | 0.538 |
| 1423172_at   | N-ethylmaleimide sensitive fusion protein attachment protein                        | Napb          | 1.6   | 0.042 | 2.83 | 0.043 | 1.02  | 0.872 | 1.16  | 0.184 | -1.07 | 0.886 |
| 1453102_at   | fibronectin leucine rich transmembrane protein 3                                    | Fltr3         | 1.6   | 0.437 | 2.79 | 0.025 | 1.33  | 0.001 | 1.31  | 0.032 | 1.5   | 0.013 |
| 1432964_at   | RIKEN cDNA 2410049M19 gene                                                          | 2410049M19Rik | 2     | 0.732 | 2.77 | 0.025 | 1.16  | 0.704 | 3.03  | 0.145 | 1.27  | 0.730 |
| 1439061_at   | coiled-coil domain containing 84                                                    | Ccdc84        | 2.8   | 0.302 | 2.77 | 0.008 | -1.46 | 0.173 | 1.29  | 0.220 | -1.03 | 0.841 |
| 1455894_at   | peptidyl-tRNA hydrolase 2                                                           | Pthr2         | 1.57  | 0.223 | 2.77 | 0.009 | 1.65  | 0.003 | 1.8   | 0.019 | 1.56  | 0.012 |
| 1438293_at   | trichoplein, keratin filament binding                                               | Tchp          | 1.67  | 0.049 | 2.77 | 0.036 | 1.33  | 0.199 | 1.28  | 0.292 | 1.27  | 0.300 |
| 1444449_at   | Ubiquitin specific peptidase 18                                                     | Usp18         | 2.07  | 0.047 | 2.77 | 0.044 | -1.4  | 0.192 | 1.42  | 0.838 | 2.21  | 0.261 |
| 1433068_at   | RIKEN cDNA 6330582A15 gene                                                          | 6330582A15Rik | 3.12  | 0.104 | 2.76 | 0.048 | 1.02  | 0.853 | 1.1   | 0.875 | -1.17 | 0.530 |
| 1446990_at   | nuclear factor I/A                                                                  | Nfia          | 2.63  | 0.376 | 2.76 | 0.024 | 2.44  | 0.366 | 1.83  | 0.881 | 1.18  | 0.417 |
| 1430344_at   | RIKEN cDNA 2900064P18 gene                                                          | 2900064P18Rik | 2.38  | 0.057 | 2.75 | 0.000 | -1.25 | 0.147 | -1.06 | 0.814 | -1.68 | 0.055 |
| 1451773_s_at | polymerase (RNA) III (DNA directed) polypeptide F                                   | Polr3f        | 2.42  | 0.270 | 2.74 | 0.048 | -1.04 | 0.706 | 1.37  | 0.039 | -1.03 | 0.810 |
| 1420020_at   | suppressor of zeste 12 homolog (Drosophila)                                         | Suz12         | 1.18  | 0.839 | 2.74 | 0.015 | 1.49  | 0.087 | -2.29 | 0.023 | 1.84  | 0.416 |
| 1446010_at   | similar to F-box only protein 34 /// similar to F-box only protein LOC668019 /// LC | LOC668019     | 2.44  | 0.356 | 2.73 | 0.011 | 2.07  | 0.397 | -1.11 | 0.522 | 1.72  | 0.213 |
| 1450303_at   | ventral anterior homeobox containing gene 2                                         | Vax2          | 1.87  | 0.317 | 2.73 | 0.040 | 1.28  | 0.746 | 1.15  | 0.640 | 1.89  | 0.787 |
| 1449128_at   | coiled-coil domain containing 43                                                    | Ccdc43        | 2.28  | 0.750 | 2.72 | 0.017 | -1.01 | 0.808 | -1.03 | 0.643 | 1.38  | 0.096 |
| 1451944_a_at | tumor necrosis factor (ligand) superfamily, member 11                               | Tnfsf11       | 2.63  | 0.023 | 2.72 | 0.012 | 1.17  | 0.885 | 1.63  | 0.615 | -1.14 | 0.479 |
| 1453234_at   | RIKEN cDNA 1300002K09 gene                                                          | 1300002K09Rik | 2.51  | 0.166 | 2.71 | 0.038 | 1.21  | 0.805 | 1.25  | 0.929 | 1.01  | 0.861 |
| 1445997_at   | ets variant gene 3                                                                  | Etv3          | 2.02  | 0.306 | 2.71 | 0.041 | 1.65  | 0.430 | 1.94  | 0.960 | 2.17  | 0.349 |
| 1450241_a_at | ecotropic viral integration site 2a                                                 | Evi2a         | 1.95  | 0.080 | 2.71 | 0.015 | 1.58  | 0.010 | 1.72  | 0.000 | 1.79  | 0.077 |
| 1430067_at   | RIKEN cDNA 5430401F13 gene /// hypothetical LOC625758                               | 5430401F13Rik | 1.39  | 0.879 | 2.7  | 0.015 | 1.03  | 0.964 | 1.83  | 0.141 | 1.2   | 0.666 |
| 1428077_at   | transmembrane protein 163                                                           | Tmem163       | 1.67  | 0.329 | 2.7  | 0.003 | 2.2   | 0.596 | 1.58  | 0.739 | 1.14  | 0.790 |
| 1435497_at   | RIKEN cDNA 5730590G19 gene                                                          | 5730590G19Rik | 2.57  | 0.108 | 2.69 | 0.011 | 1.14  | 0.437 | 1.09  | 0.390 | 1.23  | 0.037 |
| 1437856_at   | inositol polyphosphate multikinase                                                  | Ipmk          | 3.26  | 0.218 | 2.68 | 0.021 | -1.1  | 0.456 | 1.02  | 0.936 | 1.05  | 0.885 |
| 1433938_at   | transformation related protein 53 binding protein 2                                 | Trp53bp2      | 2.12  | 0.204 | 2.68 | 0.031 | -1.04 | 0.753 | 1.13  | 0.284 | 1.09  | 0.344 |
| 1436285_at   | coiled-coil domain containing 113                                                   | Ccdc113       | 2.51  | 0.311 | 2.67 | 0.021 | 1.6   | 0.352 | 1.16  | 0.748 | 2.32  | 0.786 |
| 1441723_at   | dual specificity phosphatase 22                                                     | Dusp22        | 2.23  | 0.414 | 2.67 | 0.047 | 1.59  | 0.686 | 1.28  | 0.608 | 1.29  | 0.341 |
| 1416775_at   | RIKEN cDNA 2310004L02 gene                                                          | 2310004L02Rik | 4.61  | 0.261 | 2.66 | 0.007 | 1.35  | 0.088 | -1.1  | 0.436 | 1.24  | 0.244 |
| 1440000_at   | RIKEN cDNA E330013P04 gene                                                          | E330013P04Rik | 1.04  | 0.726 | 2.66 | 0.038 | 1.96  | 0.988 | 1.67  | 0.444 | 2.32  | 0.690 |
| 1454827_at   | pogo transposable element with ZNF domain                                           | Pogz          | 3.2   | 0.673 | 2.66 | 0.049 | 1.88  | 0.162 | -1.03 | 0.749 | 1.9   | 0.052 |
| 1437183_at   | leucine rich repeat containing 4B                                                   | Lrrc4b        | 1.87  | 0.082 | 2.65 | 0.049 | -1.55 | 0.163 | -1.04 | 0.543 | 1.27  | 0.616 |
| 1418685_at   | toll-interleukin 1 receptor (TIR) domain-containing adaptor protein                 | Tirap         | 1.47  | 0.478 | 2.65 | 0.023 | 1.02  | 0.942 | 1.08  | 0.737 | 1.23  | 0.184 |
| 1459051_at   | RIKEN cDNA 6530418L21 gene                                                          | 6530418L21Rik | 1.36  | 0.150 | 2.64 | 0.041 | 1.33  | 0.134 | 1.26  | 0.776 | 1.17  | 0.659 |

|              |                                                                           |                   |       |       |      |       |       |       |       |       |       |       |
|--------------|---------------------------------------------------------------------------|-------------------|-------|-------|------|-------|-------|-------|-------|-------|-------|-------|
| 1443664_s_at | D164 sialomucin-like 2                                                    | Cd164l2           | 1.57  | 0.267 | 2.64 | 0.021 | 1.12  | 0.983 | -1.45 | 0.167 | 2.01  | 0.057 |
| 1437255_at   | Zinc finger and BTB domain containing 7a                                  | Zbtb7a            | 1.29  | 0.386 | 2.64 | 0.040 | 2.7   | 0.103 | 1.27  | 0.049 | -1.39 | 0.228 |
| 1436219_at   | RIKEN cDNA 4933403F05 gene                                                | 4933403F05Rik     | 1.4   | 0.038 | 2.63 | 0.005 | 1.56  | 0.008 | 1.75  | 0.002 | 1.69  | 0.008 |
| 1449877_s_at | kinesin family member C1                                                  | Kifc1             | 2.19  | 0.447 | 2.63 | 0.046 | 1.5   | 0.298 | 1.94  | 0.055 | 1.42  | 0.683 |
| 1455489_at   | leucine rich repeat transmembrane neuronal 2                              | Lrrtm2            | 1.4   | 0.016 | 2.63 | 0.018 | 1.71  | 0.103 | 2     | 0.012 | 2.11  | 0.055 |
| 1442846_at   | Pre B-cell leukemia transcription factor 1                                | Pbx1              | 1.42  | 0.738 | 2.63 | 0.004 | 1.48  | 0.434 | 1.57  | 0.737 | 1.19  | 0.683 |
| 1448813_at   | arylacetamide deacetylase (esterase)                                      | Aadac             | 1.09  | 0.191 | 2.62 | 0.016 | 1.63  | 0.136 | -1.34 | 0.116 | 2.76  | 0.534 |
| 1451562_at   | cDNA sequence BC006662                                                    | BC006662          | 3.29  | 0.399 | 2.62 | 0.028 | 1.04  | 0.817 | 1.11  | 0.490 | 1.04  | 0.745 |
| 1434381_at   | cDNA sequence BC060631                                                    | BC060631          | 2.84  | 0.424 | 2.62 | 0.042 | 1.14  | 0.534 | 1.22  | 0.210 | 1.14  | 0.189 |
| 1458826_at   | expressed sequence C78809                                                 | C78809            | 1.72  | 0.900 | 2.62 | 0.004 | 1.78  | 0.056 | 1.52  | 0.720 | -1.48 | 0.215 |
| 1437665_at   | Interleukin 22 receptor, alpha 2                                          | Il22ra2           | 1.53  | 0.575 | 2.61 | 0.004 | -1.7  | 0.135 | 1.66  | 0.419 | 1.88  | 0.478 |
| 1424194_at   | RCSD domain containing 1                                                  | Rcsd1             | 2.28  | 0.184 | 2.6  | 0.009 | 1.33  | 0.490 | -1.11 | 0.663 | 1.48  | 0.326 |
| 1433406_at   | hypothetical protein LOC668408 /// hypothetical protein LOC668408 /// LOC |                   | 3.19  | 0.673 | 2.59 | 0.018 | 1.82  | 0.085 | -1.33 | 0.233 | 1.23  | 0.776 |
| 1418105_at   | stathmin-like 4                                                           | Stmn4             | 1.15  | 0.894 | 2.59 | 0.046 | 1.31  | 0.182 | -2.01 | 0.071 | 2.69  | 0.734 |
| 1448966_a_at | nuclear factor of activated T-cells 5                                     | Nfat5             | 3.6   | 0.283 | 2.58 | 0.020 | -1.52 | 0.229 | 2.77  | 0.757 | 1.42  | 0.581 |
| 1458572_at   | chromatin modifying protein 5                                             | Chmp5             | 3.86  | 0.088 | 2.57 | 0.030 | 1.97  | 0.294 | 2.04  | 0.426 | -1.03 | 0.525 |
| 1441391_at   | Guanine nucleotide binding protein (G protein), beta polypept             | Gnb1l             | 1.26  | 0.180 | 2.57 | 0.004 | 1.55  | 0.056 | 1.49  | 0.124 | 1.56  | 0.154 |
| 1455930_at   | hypothetical protein LOC673503                                            | LOC673503         | 1.64  | 0.223 | 2.57 | 0.046 | 1.02  | 0.999 | 1.74  | 0.114 | 1.43  | 0.297 |
| 1441595_at   | Excision repair cross-complementing rodent repair deficiency              | Csb               | 3.12  | 0.325 | 2.55 | 0.033 | 1.81  | 0.894 | 2.24  | 0.789 | 1.29  | 0.974 |
| 1431840_at   | DENN/MADD domain containing 1C                                            | Dennd1c           | 1.55  | 0.739 | 2.55 | 0.035 | 1.41  | 0.055 | 1.04  | 0.718 | 1.09  | 0.909 |
| 1438097_at   | RAB20, member RAS oncogene family                                         | Rab20             | 2.66  | 0.267 | 2.55 | 0.043 | -1.05 | 0.634 | 1.25  | 0.440 | 1.2   | 0.728 |
| 1451755_a_at | apolipoprotein B editing complex 1                                        | Apoec1            | -1.08 | 0.962 | 2.54 | 0.007 | 2.02  | 0.456 | 2.17  | 0.140 | 3.17  | 0.039 |
| 1453211_at   | coiled-coil domain containing 89                                          | Ccdc89            | 2.04  | 0.109 | 2.54 | 0.009 | 1.08  | 0.877 | 1.19  | 0.729 | 1.1   | 0.995 |
| 1459215_at   | Lysosomal-associated protein transmembrane 4B                             | Laptm4b           | 1.63  | 0.571 | 2.54 | 0.026 | 1.06  | 0.976 | 1.96  | 0.638 | -1.05 | 0.878 |
| 1430797_at   | exportin 4                                                                | Xpo4              | 2.2   | 0.140 | 2.54 | 0.014 | 1.4   | 0.823 | -2.25 | 0.028 | -1.59 | 0.048 |
| 1428803_at   | RIKEN cDNA 4632408A20 gene                                                | 4632408A20Rik     | 2.11  | 0.278 | 2.53 | 0.038 | -1.09 | 0.460 | 1.58  | 0.006 | 1.25  | 0.078 |
| 1441084_at   | expressed sequence BE686333                                               | BE686333          | 1.61  | 0.032 | 2.53 | 0.021 | 2.19  | 0.257 | -1.17 | 0.116 | 1.31  | 0.455 |
| 1417479_at   | RIKEN cDNA 4930511A21 gene                                                | 4930511A21Rik     | 3.38  | 0.288 | 2.52 | 0.032 | 1.34  | 0.127 | 1.14  | 0.456 | 1.27  | 0.042 |
| 1460499_at   | RIKEN cDNA 9230110I02 gene                                                | 9230110I02Rik     | 1.86  | 0.176 | 2.52 | 0.010 | -1.34 | 0.251 | -1.19 | 0.336 | 1.4   | 0.098 |
| 1450926_at   | ATPase, H+ transporting, lysosomal V1 subunit G1 /// similar              | Atp6v1g1 /// LOC6 | 3.74  | 0.263 | 2.52 | 0.019 | 3.48  | 0.187 | -1.38 | 0.185 | -1.19 | 0.245 |
| 1420993_at   | UDP-GlcNAc:betaGal beta-1,3-N-acetylglucosaminyltransfer                  | B3gnt5            | 1.73  | 0.047 | 2.52 | 0.048 | 1.08  | 0.627 | -1.13 | 0.430 | -1.48 | 0.075 |
| 1422016_a_at | centromere protein H                                                      | Cenph             | 2.13  | 0.105 | 2.51 | 0.029 | 1.12  | 0.481 | 1.05  | 0.557 | 1.1   | 0.094 |
| 1456010_x_at | hairy and enhancer of split 5 (Drosophila)                                | Hes5              | 1.01  | 0.100 | 2.51 | 0.020 | 1.1   | 0.679 | 2.87  | 0.015 | 1.21  | 0.883 |
| 1441933_x_at | phosphatidylinositol glycan anchor biosynthesis, class Z                  | Pigz              | 2.23  | 0.243 | 2.51 | 0.024 | -1.27 | 0.319 | 1.8   | 0.397 | 1.37  | 0.899 |
| 1453996_a_at | cathepsin 3                                                               | Cts3              | -1.07 | 0.505 | 2.5  | 0.038 | 2     | 0.155 | 1.27  | 0.629 | 2.27  | 0.753 |
| 1416296_at   | interleukin 2 receptor, gamma chain                                       | Il2rg             | 3.08  | 0.579 | 2.5  | 0.023 | -1.1  | 0.589 | -1.08 | 0.537 | -1.44 | 0.378 |
| 1433423_at   | RIKEN cDNA 2210008N01 gene                                                | 2210008N01Rik     | 1.68  | 0.751 | 2.49 | 0.015 | 3.22  | 0.181 | 1.79  | 0.781 | 1.57  | 0.783 |
| 1424518_at   | RIKEN cDNA 2310016F22 gene /// cDNA sequence BC0204                       | 2310016F22Rik //  | 1.81  | 0.247 | 2.49 | 0.042 | 1.43  | 0.134 | 1     | 0.848 | 1.2   | 0.158 |
| 1454139_at   | RIKEN cDNA 4930405N21 gene                                                | 4930405N21Rik     | 2.21  | 0.199 | 2.49 | 0.049 | 1.5   | 0.271 | -1.05 | 0.667 | 1.65  | 0.380 |
| 1456076_at   | defensin beta 19                                                          | Defb19            | 1.15  | 0.426 | 2.49 | 0.009 | -2.17 | 0.054 | 1.34  | 0.324 | 3.69  | 0.206 |
| 1422663_at   | origin recognition complex, subunit 1-like (S.cerevisiae)                 | Orc1l             | 1.97  | 0.056 | 2.49 | 0.037 | 1.19  | 0.064 | 1.02  | 0.632 | 1.36  | 0.196 |
| 1430427_a_at | protocadherin 18                                                          | Pcdh18            | 1.7   | 0.016 | 2.49 | 0.021 | 2.08  | 0.133 | 1.7   | 0.129 | 1.75  | 0.029 |
| 1418181_at   | protein tyrosine phosphatase 4a3                                          | Ptp4a3            | 1.66  | 0.306 | 2.48 | 0.035 | 1.24  | 0.080 | 1.21  | 0.045 | 1.38  | 0.036 |
| 1428990_at   | RIKEN cDNA 2310047K21 gene                                                | 2310047K21Rik     | 1.85  | 0.155 | 2.46 | 0.046 | -1.1  | 0.584 | -1.09 | 0.469 | -1.06 | 0.615 |
| 1458159_at   | Guanine nucleotide binding protein, alpha q polypeptide                   | Gnaq              | 1.15  | 0.312 | 2.46 | 0.009 | 1.21  | 0.658 | 2.26  | 0.432 | 1.5   | 0.309 |
| 1435860_at   | solute carrier family 5 (sodium-dependent vitamin transporter             | Slc5a6            | 1.23  | 0.599 | 2.46 | 0.033 | 1.17  | 0.729 | 1.28  | 0.289 | 1.94  | 0.028 |
| 1445271_at   | RIKEN cDNA 9230105E10 gene                                                | 9230105E10Rik     | 2.34  | 0.116 | 2.45 | 0.043 | 3.17  | 0.261 | 1.61  | 0.513 | -1.09 | 0.508 |
| 1430080_at   | ficolin B                                                                 | Fcnb              | 1.57  | 0.759 | 2.45 | 0.034 | 1.95  | 0.366 | -1.1  | 0.705 | 1.5   | 0.279 |
| 1430780_a_at | phosphomannomutase 1                                                      | Pmm1              | 2.06  | 0.315 | 2.45 | 0.022 | 1.05  | 0.769 | 1.23  | 0.004 | 1.17  | 0.012 |
| 1456543_at   | prokineticin receptor 1                                                   | Prokr1            | 2.46  | 0.011 | 2.45 | 0.014 | 2.2   | 0.016 | 1.66  | 0.659 | 1.22  | 0.724 |
| 1455852_at   | RIKEN cDNA 4833432M17 gene                                                | 4833432M17Rik     | 1.92  | 0.197 | 2.44 | 0.010 | 1.12  | 0.593 | 1.3   | 0.030 | 1.04  | 0.997 |
| 1458121_at   | RIKEN cDNA A430107O13 gene                                                | A430107O13Rik     | 1.97  | 0.234 | 2.44 | 0.012 | 1.29  | 0.107 | -1.93 | 0.033 | -1.13 | 0.541 |
| 1436122_at   | zinc finger protein 667                                                   | Zfp667            | 1.77  | 0.298 | 2.44 | 0.018 | 1.16  | 0.422 | 1.14  | 0.069 | 1.36  | 0.254 |
| 1454114_a_at | RIKEN cDNA 4933425K02 gene                                                | 4933425K02Rik     | 1.23  | 0.374 | 2.43 | 0.004 | 1.65  | 0.317 | 1.68  | 0.861 | 1.95  | 0.103 |
| 1455794_at   | RIKEN cDNA D130058I21 gene                                                | D130058I21Rik     | -1.12 | 0.478 | 2.43 | 0.018 | 3.2   | 0.289 | 1.58  | 0.699 | 1.92  | 0.438 |
| 1419021_at   | mcf.2 transforming sequence                                               | Mcf2              | 2.3   | 0.630 | 2.43 | 0.016 | -1.27 | 0.354 | -1.33 | 0.343 | -1.27 | 0.453 |
| 1442589_at   | Transient receptor potential cation channel, subfamily C, mer             | Trpc5             | 1.92  | 0.083 | 2.42 | 0.007 | -1.06 | 0.534 | 1.38  | 0.392 | -1.22 | 0.511 |
| 1454472_at   | RIKEN cDNA 2900092N22 gene                                                | 2900092N22Rik     | 1.02  | 0.439 | 2.41 | 0.002 | 1.23  | 0.731 | 2.7   | 0.156 | 2.46  | 0.207 |

|              |                                                                                       |       |       |      |       |       |       |       |       |       |       |
|--------------|---------------------------------------------------------------------------------------|-------|-------|------|-------|-------|-------|-------|-------|-------|-------|
| 1456178_at   | BMP and activin membrane-bound inhibitor, pseudogene (Xe Bambi-ps1                    | 2.55  | 0.349 | 2.41 | 0.014 | 3.5   | 0.008 | 1.67  | 0.965 | 2.08  | 0.379 |
| 1457083_at   | PRP31 pre-mRNA processing factor 31 homolog (yeast)                                   | 1.59  | 0.196 | 2.41 | 0.030 | 1.35  | 0.032 | 1.41  | 0.043 | 1.74  | 0.020 |
| 1438532_at   | hemicentin 1                                                                          | 2.01  | 0.110 | 2.39 | 0.002 | 1.33  | 0.568 | 1.04  | 0.769 | 2.12  | 0.382 |
| 1460642_at   | Tnf receptor associated factor 4                                                      | 1.67  | 0.344 | 2.39 | 0.029 | 1.21  | 0.005 | 1.43  | 0.079 | 1.48  | 0.090 |
| 1418865_at   | zinc finger protein 385                                                               | 1.84  | 0.386 | 2.39 | 0.035 | 1.22  | 0.203 | 1.15  | 0.529 | 1.11  | 0.495 |
| 1424232_a_at | cDNA sequence BC025546                                                                | 2.75  | 0.264 | 2.38 | 0.021 | 1.65  | 0.193 | 1.34  | 0.019 | 1.41  | 0.008 |
| 1417638_at   | left right determination factor 1                                                     | 1.45  | 0.294 | 2.38 | 0.003 | 1.11  | 0.775 | 1.14  | 0.097 | 1.26  | 0.213 |
| 1421112_at   | NK2 transcription factor related, locus 2 (Drosophila)                                | 2.71  | 0.344 | 2.38 | 0.008 | 2.19  | 0.424 | 1.99  | 0.240 | 1.99  | 0.435 |
| 1459343_at   | RIKEN cDNA 2700008B19 gene                                                            | 1.73  | 0.202 | 2.37 | 0.029 | 1.61  | 0.340 | 1.17  | 0.435 | 1.32  | 0.139 |
| 1446478_at   | RIKEN cDNA D130067I03 gene                                                            | 2.01  | 0.632 | 2.37 | 0.047 | 1.64  | 0.687 | -2.28 | 0.069 | 1.8   | 0.666 |
| 1423093_at   | inner centromere protein                                                              | 2.99  | 0.641 | 2.37 | 0.008 | -1.01 | 0.844 | 1.03  | 0.622 | -1.04 | 0.776 |
| 1425898_x_at | olfactomedin 3                                                                        | 5.03  | 0.097 | 2.37 | 0.044 | 1.23  | 0.586 | 1.84  | 0.257 | 1.17  | 0.948 |
| 1438893_at   | RIKEN cDNA 5530601H04 gene                                                            | 1.54  | 0.209 | 2.36 | 0.030 | 2.13  | 0.758 | 2.22  | 0.035 | -1.1  | 0.875 |
| 1454638_a_at | phenylalanine hydroxylase                                                             | 2     | 0.616 | 2.36 | 0.001 | -1.69 | 0.147 | -1.23 | 0.497 | 1.15  | 0.332 |
| 1453393_a_at | carbohydrate (chondroitin 6/keratan) sulfotransferase 4                               | 2.49  | 0.040 | 2.35 | 0.050 | -1.41 | 0.234 | -1.21 | 0.191 | 2.98  | 0.258 |
| 1424676_s_at | SEC14-like 4 (S. cerevisiae)                                                          | -1.08 | 0.444 | 2.35 | 0.045 | -1.23 | 0.374 | 1.21  | 0.598 | 2.25  | 0.733 |
| 1422196_at   | 5-hydroxytryptamine (serotonin) receptor 5B                                           | -1.42 | 0.076 | 2.34 | 0.027 | -1.19 | 0.394 | 1.18  | 0.868 | 2.97  | 0.355 |
| 1457331_at   | Retbindin                                                                             | 1.05  | 0.618 | 2.34 | 0.005 | 1.7   | 0.329 | 1.76  | 0.053 | 1.3   | 0.760 |
| 1429350_at   | RIKEN cDNA 1700027M21 gene                                                            | 2.19  | 0.423 | 2.33 | 0.032 | 2.8   | 0.163 | 1.17  | 0.751 | 1.78  | 0.165 |
| 1420588_at   | serine protease inhibitor-like, with Kunitz and WAP domains                           | 1.9   | 0.175 | 2.33 | 0.035 | 2.85  | 0.058 | 1.12  | 0.788 | 1.92  | 0.447 |
| 1426472_at   | zinc finger protein 52                                                                | 1.44  | 0.034 | 2.33 | 0.024 | 1.45  | 0.028 | 1.45  | 0.196 | 1.2   | 0.699 |
| 1423494_at   | RIKEN cDNA 2310042E22 gene                                                            | 1.16  | 0.650 | 2.32 | 0.001 | 1.29  | 0.733 | -1.35 | 0.325 | 1.33  | 0.519 |
| 1460497_a_at | RIKEN cDNA 4933413B09 gene                                                            | 1.73  | 0.974 | 2.32 | 0.011 | 1.75  | 0.390 | 1.31  | 0.764 | 1.47  | 0.804 |
| 1439547_at   | RIKEN cDNA A930007A09 gene                                                            | 1.43  | 0.231 | 2.32 | 0.007 | 4.39  | 0.167 | 1.21  | 0.139 | 1.44  | 0.160 |
| 1450329_a_at | arrestin 3, retinal                                                                   | 3.75  | 0.018 | 2.32 | 0.023 | 1.24  | 0.454 | 1.06  | 0.689 | 1.26  | 0.695 |
| 1442400_at   | Prickle like 1 (Drosophila)                                                           | 1.36  | 0.440 | 2.31 | 0.011 | -1.4  | 0.063 | -1.09 | 0.377 | 2.42  | 0.680 |
| 1424974_at   | zinc finger protein 418                                                               | 2.02  | 0.158 | 2.31 | 0.021 | -1.08 | 0.596 | 1.42  | 0.193 | 1.4   | 0.241 |
| 1421850_at   | microtubule-associated protein 1 B                                                    | 4.5   | 0.089 | 2.29 | 0.043 | 2.04  | 0.941 | -1.06 | 0.850 | 1.25  | 0.639 |
| 1435033_at   | Rho guanine nucleotide exchange factor (GEF) 4                                        | 1.46  | 0.144 | 2.28 | 0.026 | -1.13 | 0.407 | 1.29  | 0.008 | 1.31  | 0.421 |
| 1418293_at   | interferon-induced protein with tetratricopeptide repeats 2                           | 1.48  | 0.508 | 2.28 | 0.039 | 1.33  | 0.466 | 1.11  | 0.539 | -1.14 | 0.030 |
| 1436922_at   | peptidylprolyl isomerase (cyclophilin) like 5                                         | 1.54  | 0.060 | 2.28 | 0.024 | 1.24  | 0.002 | 1.26  | 0.293 | 1.4   | 0.038 |
| 1434774_at   | rhomboid 5 homolog 2 (Drosophila)                                                     | -1.6  | 0.092 | 2.28 | 0.036 | 3.36  | 0.456 | 1.85  | 0.534 | -1.32 | 0.264 |
| 1454728_s_at | ATPase, aminophospholipid transporter (APLT), class I, type                           | 3.01  | 0.321 | 2.27 | 0.022 | -1.23 | 0.096 | -1.13 | 0.526 | 1.56  | 0.367 |
| 1458683_at   | signal-regulatory protein beta 1 /// similar to SIRP beta 1 isoform Sirpb1 /// LOC673 | 1.28  | 0.118 | 2.27 | 0.050 | 1.44  | 0.773 | 1.32  | 0.274 | -1.48 | 0.159 |
| 1423056_at   | neuron specific gene family member 1                                                  | 2.33  | 0.114 | 2.26 | 0.008 | -1.25 | 0.455 | -1.3  | 0.241 | 1.48  | 0.735 |
| 1454951_at   | zinc finger protein 606                                                               | 2.35  | 0.508 | 2.26 | 0.017 | 1.16  | 0.621 | -1.1  | 0.189 | 1.15  | 0.596 |
| 1425083_at   | otraplin                                                                              | 2.51  | 0.488 | 2.25 | 0.039 | 3.43  | 0.020 | 1.02  | 0.261 | 1.19  | 0.957 |
| 1448414_at   | RAD1 homolog (S. pombe)                                                               | 2.25  | 0.360 | 2.25 | 0.015 | 1.24  | 0.105 | 1.22  | 0.115 | 1.07  | 0.209 |
| 1427570_at   | signal recognition particle receptor ('docking protein')                              | 3.12  | 0.330 | 2.25 | 0.032 | -1.42 | 0.071 | -1.2  | 0.391 | -1.09 | 0.523 |
| 1443059_at   | dehydrogenase/reductase (SDR family) member 8                                         | 1.28  | 0.838 | 2.24 | 0.010 | 1.97  | 0.535 | -1.06 | 0.674 | -1.03 | 0.617 |
| 1453156_s_at | zinc binding alcohol dehydrogenase, domain containing 1                               | 1.85  | 0.145 | 2.24 | 0.047 | -1.03 | 0.677 | 1.47  | 0.120 | 1.09  | 0.833 |
| 1432513_a_at | RIKEN cDNA 1700001C02 gene                                                            | 1.33  | 0.725 | 2.23 | 0.015 | 1.04  | 0.614 | 2.81  | 0.205 | 3.01  | 0.068 |
| 1460333_at   | DEAD (Asp-Glu-Ala-Asp) box polypeptide 59                                             | 1.73  | 0.241 | 2.23 | 0.031 | 1.07  | 0.293 | 1.07  | 0.594 | 1.34  | 0.161 |
| 1460380_at   | desmoglein 2                                                                          | 1.71  | 0.033 | 2.23 | 0.046 | 1.48  | 0.510 | -1    | 0.717 | 1.19  | 0.354 |
| 1455501_at   | solute carrier family 2 (facilitated glucose transporter), memb                       | 1.82  | 0.284 | 2.23 | 0.035 | 1.18  | 0.541 | -1.16 | 0.367 | 2.29  | 0.845 |
| 1416258_at   | thymidine kinase 1                                                                    | 2.05  | 0.153 | 2.23 | 0.014 | 1.25  | 0.061 | 1.18  | 0.115 | 1.22  | 0.082 |
| 1429702_at   | RIKEN cDNA 2900072G11 gene                                                            | 1.46  | 0.794 | 2.22 | 0.048 | 2.25  | 0.544 | -1.55 | 0.365 | 2.13  | 0.078 |
| 1458734_at   | expressed sequence C78128                                                             | 1.03  | 0.967 | 2.22 | 0.049 | 1.6   | 0.355 | 1.71  | 0.929 | 1.58  | 0.840 |
| 1433575_at   | similar to Transcription factor SOX-4                                                 | 1.53  | 0.189 | 2.22 | 0.048 | 1.45  | 0.012 | 1.39  | 0.011 | 1.56  | 0.000 |
| 1453739_at   | transmembrane protein 126B                                                            | 1.8   | 0.254 | 2.22 | 0.048 | 1.41  | 0.038 | 1.44  | 0.298 | 1.45  | 0.035 |
| 1456652_at   | denticleless homolog (Drosophila)                                                     | 1.66  | 0.013 | 2.21 | 0.006 | 1.13  | 0.802 | 1.82  | 0.366 | -1.05 | 0.669 |
| 1431422_a_at | dual specificity phosphatase 14                                                       | 1.88  | 0.299 | 2.21 | 0.031 | 1.32  | 0.019 | 1.37  | 0.006 | 1.27  | 0.039 |
| 1434734_at   | RIKEN cDNA E130016E03 gene                                                            | 1.94  | 0.246 | 2.21 | 0.017 | 1.2   | 0.211 | 1.18  | 0.002 | -1.14 | 0.345 |
| 1434762_at   | transmembrane protein 142B                                                            | 2.36  | 0.588 | 2.21 | 0.031 | 1.32  | 0.346 | 1.19  | 0.264 | 1.19  | 0.067 |
| 1430481_at   | RIKEN cDNA 4930545L23 gene                                                            | 1.46  | 0.554 | 2.19 | 0.049 | 1.38  | 0.005 | 1.45  | 0.673 | 1.29  | 0.489 |
| 1454812_at   | RIKEN cDNA 5730601F06 gene                                                            | 1.11  | 0.226 | 2.19 | 0.003 | 1.12  | 0.340 | 1.43  | 0.032 | 1.41  | 0.064 |
| 1417885_at   | microtubule-associated protein tau                                                    | 1.99  | 0.340 | 2.19 | 0.050 | -1.37 | 0.258 | 1.79  | 0.073 | -1.25 | 0.165 |
| 1447967_at   | transmembrane protein 69                                                              | 1.64  | 0.144 | 2.19 | 0.016 | 1.01  | 0.713 | 1.51  | 0.266 | 1.36  | 0.356 |

|              |                                                                           |               |       |       |      |       |       |       |       |       |       |       |
|--------------|---------------------------------------------------------------------------|---------------|-------|-------|------|-------|-------|-------|-------|-------|-------|-------|
| 1421675_at   | RIKEN cDNA 1700123K08 gene                                                | 1700123K08Rik | 1.62  | 0.645 | 2.18 | 0.034 | 1.02  | 0.871 | 1.27  | 0.300 | -1.34 | 0.233 |
| 1454291_at   | RIKEN cDNA 4933428P19 gene                                                | 4933428P19Rik | 1.37  | 0.916 | 2.18 | 0.025 | 3.5   | 0.068 | 1.59  | 0.463 | 1.55  | 0.190 |
| 1440085_at   | ectodysplasin A2 isoform receptor                                         | Eda2r         | 1.43  | 0.232 | 2.18 | 0.029 | 1.35  | 0.006 | 1.15  | 0.032 | 1.24  | 0.006 |
| 1429734_at   | RIKEN cDNA 4632434I11 gene                                                | 4632434I11Rik | 1.45  | 0.010 | 2.17 | 0.002 | 1.35  | 0.157 | 1.4   | 0.002 | 1.57  | 0.048 |
| 1415811_at   | ubiquitin-like, containing PHD and RING finger domains, 1                 | Uhrf1         | 2     | 0.415 | 2.17 | 0.021 | 1.17  | 0.133 | 1.03  | 0.629 | 1.24  | 0.285 |
| 1435802_at   | zinc finger protein 499                                                   | Zfp499        | 1.8   | 0.430 | 2.17 | 0.021 | 1.03  | 0.889 | 1.07  | 0.485 | 1.21  | 0.291 |
| 1436837_at   | maelstrom homolog (Drosophila)                                            | Mael          | 2.1   | 0.280 | 2.16 | 0.034 | 1.25  | 0.530 | -1.02 | 0.554 | -1.79 | 0.098 |
| 1426176_a_at | prokineticin 2                                                            | Prok2         | 3.23  | 0.154 | 2.16 | 0.007 | -1.53 | 0.257 | 1.68  | 0.929 | 1.13  | 0.531 |
| 1453027_at   | discs, large (Drosophila) homolog-associated protein 1                    | Dlgap1        | 1.01  | 0.832 | 2.15 | 0.016 | 1.24  | 0.922 | 1.35  | 0.900 | 1.1   | 0.759 |
| 1450886_at   | germ cell-specific gene 2                                                 | Gsg2          | 1.98  | 0.429 | 2.15 | 0.005 | 1.14  | 0.177 | 1.22  | 0.084 | 1.33  | 0.019 |
| 1416915_at   | mutS homolog 6 (E. coli)                                                  | Msh6          | 1.1   | 0.060 | 2.15 | 0.000 | 1.51  | 0.047 | 1.47  | 0.029 | 1.4   | 0.023 |
| 1433582_at   | RIKEN cDNA 1190002N15 gene                                                | 1190002N15Rik | 1.6   | 0.203 | 2.14 | 0.039 | 1.45  | 0.015 | 1.24  | 0.030 | 1.13  | 0.156 |
| 1442406_at   | RIKEN cDNA 9230104K21 gene                                                | 9230104K21Rik | 1.61  | 0.696 | 2.14 | 0.020 | 1.87  | 0.121 | 1.19  | 0.035 | 1.65  | 0.291 |
| 1458544_at   | cDNA sequence BC059841                                                    | BC059841      | -1.04 | 0.361 | 2.14 | 0.028 | -1.11 | 0.269 | 1.69  | 0.689 | 2.16  | 0.987 |
| 1418109_at   | G1 to S phase transition 2                                                | Gspt2         | 1.54  | 0.504 | 2.14 | 0.005 | 1.17  | 0.423 | 1.41  | 0.088 | 1.21  | 0.177 |
| 1448359_a_at | HIG1 domain family, member 1A                                             | Higd1a        | 2.22  | 0.093 | 2.14 | 0.020 | 1.33  | 0.149 | 1.26  | 0.598 | 1.21  | 0.239 |
| 1423808_at   | WD repeat domain 79                                                       | Wdr79         | 1.78  | 0.175 | 2.14 | 0.040 | 1.26  | 0.061 | 1.13  | 0.069 | 1.16  | 0.109 |
| 1435650_at   | hyaluronan and proteoglycan link protein 4                                | Hapln4        | 2     | 0.408 | 2.13 | 0.049 | 1.14  | 0.744 | 1.42  | 0.775 | 1.71  | 0.473 |
| 1454197_a_at | coiled-coil domain containing 86                                          | Ccdc86        | 1.61  | 0.509 | 2.12 | 0.035 | 1.04  | 0.332 | 1.14  | 0.094 | 1.24  | 0.010 |
| 1419209_at   | chemokine (C-X-C motif) ligand 1                                          | Cxcl1         | 1.36  | 0.074 | 2.12 | 0.010 | 1.44  | 0.142 | 1.23  | 0.300 | 1.68  | 0.117 |
| 1418140_at   | doublecortin                                                              | Dcx           | 3.24  | 0.128 | 2.12 | 0.033 | 1.37  | 0.833 | -1.5  | 0.235 | 2.12  | 0.085 |
| 1436496_at   | RIKEN cDNA 1700012O15 gene                                                | 1700012O15Rik | -1.4  | 0.222 | 2.11 | 0.029 | 1.08  | 0.389 | 1.49  | 0.332 | 1.15  | 0.182 |
| 1433622_at   | germ (nuclear organelle) associated protein 4                             | Gemin4        | 1.82  | 0.236 | 2.11 | 0.013 | 1.24  | 0.013 | 1.35  | 0.009 | 1.39  | 0.005 |
| 1453678_at   | methyl-CpG binding domain protein 1                                       | Mbd1          | 1.99  | 0.825 | 2.11 | 0.025 | 1.91  | 0.282 | 1.12  | 0.980 | -1.23 | 0.427 |
| 1435213_at   | NHL repeat containing 1                                                   | Nhlrc1        | -1.04 | 0.561 | 2.11 | 0.038 | -1.06 | 0.579 | 1.37  | 0.038 | 1.01  | 0.975 |
| 1453623_a_at | RAD23a homolog (S. cerevisiae)                                            | Rad23a        | 2.58  | 0.265 | 2.11 | 0.046 | 1.24  | 0.028 | 1.08  | 0.550 | 1.16  | 0.173 |
| 1420710_at   | reticuloendotheliosis oncogene                                            | Rel           | 1.53  | 0.097 | 2.11 | 0.013 | -1.44 | 0.111 | 1.43  | 0.035 | 1.14  | 0.696 |
| 1431934_at   | RIKEN cDNA 4930505O20 gene                                                | 4930505O20Rik | 3.97  | 0.092 | 2.09 | 0.034 | -1.16 | 0.422 | 1.5   | 0.978 | -1.16 | 0.486 |
| 1457403_at   | RIKEN cDNA 9130409I23 gene                                                | 9130409I23Rik | 1.9   | 0.947 | 2.09 | 0.034 | 1.84  | 0.596 | 1.22  | 0.976 | -1.27 | 0.425 |
| 1458189_at   | EMI domain containing 2                                                   | Emid2         | 2.81  | 0.131 | 2.09 | 0.016 | -1.03 | 0.562 | 1.65  | 0.546 | -1.07 | 0.399 |
| 1419061_at   | ras homolog gene family, member D                                         | Rhod          | 1.33  | 0.344 | 2.09 | 0.012 | 1.26  | 0.021 | 1.21  | 0.049 | 1.5   | 0.005 |
| 1449414_at   | zinc finger protein 53                                                    | Zfp53         | 1.58  | 0.238 | 2.09 | 0.020 | -1.07 | 0.388 | 1.16  | 0.231 | 1.16  | 0.108 |
| 1439087_a_at | RIKEN cDNA 1500004A08 gene                                                | 1500004A08Rik | 1.48  | 0.114 | 2.08 | 0.017 | 1.13  | 0.476 | 1.34  | 0.024 | -1.02 | 0.812 |
| 1453154_at   | RIKEN cDNA 1700029M20 gene                                                | 1700029M20Rik | 2.07  | 0.489 | 2.08 | 0.039 | 1.73  | 0.362 | 1.83  | 0.117 | 1.74  | 0.284 |
| 1430636_at   | RIKEN cDNA C030010B13 gene                                                | C030010B13Rik | 1.92  | 0.183 | 2.08 | 0.041 | 1.59  | 0.486 | 1.54  | 0.720 | -1.07 | 0.469 |
| 1453252_at   | dihydrouridine synthase 4-like (S. cerevisiae)                            | Dus4l         | 1.73  | 0.033 | 2.08 | 0.005 | 1.44  | 0.627 | 2.72  | 0.013 | 1.27  | 0.260 |
| 1435390_at   | exonuclease domain containing 1                                           | Exod1         | 1.69  | 0.086 | 2.08 | 0.027 | 1.07  | 0.311 | 1.19  | 0.288 | 1.11  | 0.173 |
| 1440891_at   | glutamate receptor, ionotropic, AMPA4 (alpha 4)                           | Gria4         | 1.39  | 0.755 | 2.08 | 0.041 | -1.08 | 0.361 | 1.15  | 0.495 | 1.56  | 0.949 |
| 1452112_a_at | RNA binding motif protein 4B                                              | Rbm4b         | 1.2   | 0.458 | 2.08 | 0.004 | 1.34  | 0.206 | 2.17  | 0.004 | 1.29  | 0.385 |
| 1424551_at   | zinc finger, FYVE domain containing 27                                    | Zfyve27       | -1.16 | 0.618 | 2.08 | 0.041 | 1.49  | 0.241 | 1.23  | 0.104 | 1.72  | 0.221 |
| 1431250_at   | RIKEN cDNA 9030624G23 gene /// similar to development- a 9030624G23Rik // | Amid          | 1.54  | 0.120 | 2.07 | 0.050 | 1.17  | 0.858 | -1.2  | 0.257 | 1.27  | 0.069 |
| 1431142_s_at | apoptosis-inducing factor (AIF)-like mitochondrion-associatec             | Amid          | 2.39  | 0.327 | 2.07 | 0.009 | 1.32  | 0.447 | 1.25  | 0.277 | 1.67  | 0.321 |
| 1450677_at   | checkpoint kinase 1 homolog (S. pombe)                                    | Chek1         | 1.68  | 0.027 | 2.07 | 0.039 | 1.17  | 0.018 | 1.05  | 0.626 | 1.19  | 0.150 |
| 1425039_at   | integrin, beta-like 1                                                     | Itgbl1        | 2.3   | 0.067 | 2.07 | 0.033 | -1.08 | 0.672 | 1.41  | 0.308 | 1.22  | 0.151 |
| 1447961_s_at | mitochondrial ribosomal protein L38                                       | Mrp138        | 1.65  | 0.255 | 2.07 | 0.046 | 1.09  | 0.438 | 1.2   | 0.065 | 1.21  | 0.209 |
| 1422367_at   | olfactory receptor 70                                                     | Olf70         | 1.83  | 0.088 | 2.07 | 0.016 | 1.1   | 0.896 | 1.1   | 0.609 | 1.31  | 0.671 |
| 1427511_at   | Beta-2 microglobulin                                                      | B2m           | -1.29 | 0.230 | 2.06 | 0.044 | 1.44  | 0.385 | 1.23  | 0.473 | 1.4   | 0.162 |
| 1447116_at   | Presenilin associated, rhomboid-like                                      | Parl          | -2.33 | 0.073 | 2.06 | 0.027 | 1.98  | 0.684 | 2.74  | 0.019 | 1.85  | 0.763 |
| 1457756_at   | zinc finger protein 192                                                   | Zfp192        | 2.42  | 0.016 | 2.06 | 0.007 | 1.04  | 0.697 | 1.27  | 0.765 | 1.01  | 0.933 |
| 1428014_at   | histone 1, H4h                                                            | Hist1h4h      | 1.88  | 0.081 | 2.05 | 0.044 | 1.17  | 0.339 | 1.03  | 0.856 | 1.53  | 0.018 |
| 1456891_at   | DENN/MADD domain containing 2C                                            | Dennd2c       | 1.56  | 0.475 | 2.04 | 0.021 | 1.04  | 0.921 | 1.09  | 0.374 | 1.26  | 0.023 |
| 1453050_at   | GINS complex subunit 3 (Psf3 homolog)                                     | Gins3         | 1.65  | 0.192 | 2.04 | 0.041 | 1.21  | 0.062 | 1.24  | 0.280 | 1.21  | 0.158 |
| 1456033_at   | T-box 4                                                                   | Tbx4          | 1.73  | 0.143 | 2.04 | 0.043 | 1.43  | 0.967 | -1.05 | 0.442 | 1.34  | 0.795 |
| 1437770_at   | expressed sequence AW557046                                               | AW557046      | 1.9   | 0.302 | 2.03 | 0.024 | 1.07  | 0.642 | -1.17 | 0.490 | 1.24  | 0.957 |
| 1458163_at   | cDNA sequence BC066028                                                    | BC066028      | 1.74  | 0.642 | 2.03 | 0.027 | 1.8   | 0.031 | 1.37  | 0.126 | 1.19  | 0.446 |
| 1431353_at   | RIKEN cDNA C330050A14 gene                                                | C330050A14Rik | 2.34  | 0.362 | 2.03 | 0.036 | 1.1   | 0.844 | 1.22  | 0.091 | 1.32  | 0.458 |
| 1441503_at   | doublecortin domain containing 2a                                         | Cdcd2a        | 2.07  | 0.104 | 2.03 | 0.041 | -1.11 | 0.481 | 1.29  | 0.778 | 1.19  | 0.131 |
| 1459478_at   | expressed sequence AA408396                                               | AA408396      | 2.47  | 0.757 | 2.02 | 0.048 | 1.34  | 0.448 | 1.02  | 0.975 | 1.51  | 0.384 |

|              |                                                                                 |       |       |      |       |       |       |       |       |       |       |
|--------------|---------------------------------------------------------------------------------|-------|-------|------|-------|-------|-------|-------|-------|-------|-------|
| 1428003_s_at | thiamine triphosphatase /// zinc finger homeobox 2, antisense Thtpa /// Zfhx2as | 1.67  | 0.117 | 2.02 | 0.004 | 1.32  | 0.656 | -1.01 | 0.802 | -1.18 | 0.258 |
| 1420248_at   | tubulin, gamma 2                                                                | 1.61  | 0.082 | 2.02 | 0.007 | 1.23  | 0.549 | 1.52  | 0.577 | 1.49  | 0.439 |
| 1432656_at   | RIKEN cDNA 3222402N08 gene                                                      | 1.52  | 0.221 | 2.01 | 0.041 | -1.22 | 0.047 | 1.16  | 0.656 | 2.11  | 0.036 |
| 1416505_at   | nuclear receptor subfamily 4, group A, member 1                                 | 1.34  | 0.031 | 2.01 | 0.033 | 1.48  | 0.004 | 1.38  | 0.001 | 1.56  | 0.010 |
| 1455034_at   | Nuclear receptor subfamily 4, group A, member 2                                 | 1.28  | 0.905 | 2.01 | 0.042 | 2.06  | 0.003 | 1.63  | 0.002 | 2.37  | 0.002 |
| 1454583_at   | RIKEN cDNA 2810034D10 gene                                                      | 1.65  | 0.698 | 2    | 0.024 | 1.26  | 0.397 | 1.17  | 0.710 | 1.16  | 0.738 |
| 1433226_at   | RIKEN cDNA 6330403N20 gene                                                      | 3.17  | 0.080 | 2    | 0.038 | -1.35 | 0.227 | -1.87 | 0.101 | -1.66 | 0.191 |
| 1444024_at   | excision repair cross-complementing rodent repair deficiency                    | 1.86  | 0.286 | 2    | 0.007 | 1.03  | 0.810 | 1.47  | 0.085 | 1.53  | 0.361 |
| 1434815_a_at | mitogen-activated protein kinase-activated protein kinase 3                     | 1.31  | 0.221 | 2    | 0.037 | -1.04 | 0.516 | 1.1   | 0.117 | 1.28  | 0.149 |
| 1451415_at   | RIKEN cDNA 1810011O10 gene                                                      | 1.49  | 0.099 | 1.99 | 0.005 | 2.24  | 0.033 | 1.43  | 0.101 | 2.06  | 0.012 |
| 1452715_at   | RIKEN cDNA 2310022K01 gene                                                      | 1.4   | 0.412 | 1.99 | 0.035 | -1.06 | 0.636 | 1.16  | 0.179 | -1.26 | 0.143 |
| 1440364_a_at | RIKEN cDNA A230062G08 gene                                                      | 1.57  | 0.404 | 1.99 | 0.038 | 1.34  | 0.686 | 1.07  | 0.688 | -1.07 | 0.806 |
| 1434171_at   | RIKEN cDNA C330011K17 gene                                                      | 1.31  | 0.509 | 1.99 | 0.022 | 1.15  | 0.357 | 1.28  | 0.110 | 1.37  | 0.026 |
| 1429067_at   | calpain, small subunit 2                                                        | 1.6   | 0.205 | 1.99 | 0.048 | -1.67 | 0.056 | 1.48  | 0.745 | -1.19 | 0.389 |
| 1419456_at   | dicarbonyl L-xylulose reductase                                                 | 1.38  | 0.106 | 1.99 | 0.007 | 1.21  | 0.115 | 1.05  | 0.285 | 1.24  | 0.056 |
| 1421553_at   | epilepsy, progressive myoclonic epilepsy, type 2 gene alpha                     | 1.08  | 0.907 | 1.99 | 0.018 | 2.62  | 0.229 | -1.76 | 0.076 | -1.2  | 0.517 |
| 1424952_at   | OCIA domain containing 1                                                        | 2.11  | 0.042 | 1.99 | 0.009 | 3.14  | 0.190 | -1.13 | 0.404 | 1.66  | 0.444 |
| 1450390_x_at | ribosomal protein S18                                                           | 2.47  | 0.066 | 1.99 | 0.012 | -1.24 | 0.202 | -1.09 | 0.650 | 1.37  | 0.089 |
| 1432272_a_at | excision repair cross-complementing rodent repair deficiency                    | 1.53  | 0.354 | 1.99 | 0.002 | 2.06  | 0.950 | 1.36  | 0.367 | 1.07  | 0.384 |
| 1449122_at   | RIKEN cDNA 3110003A22 gene                                                      | 1.36  | 0.496 | 1.98 | 0.021 | 1.36  | 0.005 | 1.38  | 0.040 | 1.08  | 0.535 |
| 1440125_at   | RIKEN cDNA A530054K11 gene                                                      | 1.55  | 0.065 | 1.98 | 0.030 | 1.69  | 0.029 | -1.05 | 0.864 | 1.21  | 0.411 |
| 1448525_a_at | BCL2/adenovirus E1B interacting protein 3-like                                  | 1.75  | 0.155 | 1.98 | 0.023 | 1.23  | 0.073 | 1.06  | 0.364 | 1.07  | 0.071 |
| 1444860_at   | Laminin, alpha 3                                                                | 1.82  | 0.140 | 1.98 | 0.044 | -1.07 | 0.518 | -1.31 | 0.377 | 1.09  | 0.676 |
| 1459771_x_at | phytoceramidase, alkaline                                                       | 1.94  | 0.126 | 1.98 | 0.030 | 1.29  | 0.928 | 1.47  | 0.235 | 1.05  | 0.607 |
| 1420559_a_at | short stature homeobox 2                                                        | 1.33  | 0.575 | 1.98 | 0.012 | 2.59  | 0.097 | 1.46  | 0.129 | 1.54  | 0.136 |
| 1436108_at   | thioredoxin domain containing 9                                                 | 1.33  | 0.432 | 1.98 | 0.006 | 1.36  | 0.025 | 1.18  | 0.000 | 1.13  | 0.531 |
| 1422810_at   | zinc finger protein 191                                                         | 1.47  | 0.293 | 1.97 | 0.002 | 1.13  | 0.144 | 1.38  | 0.050 | 1.19  | 0.369 |
| 1428361_x_at | hemoglobin alpha, adult chain 1                                                 | 1.4   | 0.123 | 1.96 | 0.008 | 2     | 0.069 | 1.08  | 0.858 | -1.21 | 0.482 |
| 1417856_at   | avian reticuloendotheliosis viral (v-rel) oncogene related B                    | 1.23  | 0.340 | 1.96 | 0.027 | 1.25  | 0.322 | 1.11  | 0.160 | 1.78  | 0.508 |
| 1453945_at   | RIKEN cDNA 2310005E17 gene                                                      | 2.46  | 0.587 | 1.95 | 0.037 | -1.05 | 0.406 | 2.18  | 0.371 | -1.06 | 0.547 |
| 1440405_at   | Adenylate cyclase 3                                                             | 1.39  | 0.450 | 1.95 | 0.032 | -1.08 | 0.263 | -1.12 | 0.506 | 1.24  | 0.260 |
| 1442218_at   | mitogen-activated protein kinase kinase kinase 9                                | 2.03  | 0.457 | 1.95 | 0.016 | -1.16 | 0.510 | 1.36  | 0.611 | -1.21 | 0.538 |
| 1438661_a_at | ADP-ribosylation factor 2                                                       | 1.98  | 0.417 | 1.94 | 0.028 | -1.07 | 0.358 | 1.2   | 0.011 | 1.12  | 0.183 |
| 1437694_at   | Expressed sequence BB114266                                                     | 1.41  | 0.094 | 1.94 | 0.036 | 1.11  | 0.498 | 1.04  | 0.740 | 1.09  | 0.637 |
| 1448272_at   | B-cell translocation gene 2, anti-proliferative                                 | 1.23  | 0.153 | 1.94 | 0.048 | 1.43  | 0.018 | 1.09  | 0.254 | 1.25  | 0.187 |
| 1418184_at   | centromere protein M                                                            | 2.4   | 0.205 | 1.94 | 0.030 | 1.15  | 0.148 | 1.15  | 0.345 | -1.01 | 0.681 |
| 1426235_a_at | glutamate-ammonia ligase (glutamine synthetase)                                 | 1.53  | 0.402 | 1.94 | 0.027 | 1.2   | 0.964 | 1.03  | 0.688 | 1.16  | 0.021 |
| 1452224_at   | microorchidia 3                                                                 | 1.67  | 0.136 | 1.94 | 0.013 | 1.14  | 0.036 | 1.12  | 0.087 | 1.06  | 0.391 |
| 1437949_x_at | zinc finger protein 313                                                         | 2.02  | 0.039 | 1.93 | 0.009 | 1.52  | 0.738 | 1.21  | 0.340 | -1.09 | 0.341 |
| 1448924_at   | RIKEN cDNA 4432406C05 gene                                                      | 1.73  | 0.733 | 1.92 | 0.031 | -1.21 | 0.141 | 1.16  | 0.404 | 1.13  | 0.552 |
| 1449115_at   | metal response element binding transcription factor 2                           | 1.4   | 0.130 | 1.92 | 0.042 | 1.4   | 0.139 | 1.21  | 0.637 | -1.17 | 0.168 |
| 1415975_at   | calcium regulated heat stable protein 1                                         | 1.61  | 0.152 | 1.91 | 0.034 | 1.22  | 0.024 | 1.17  | 0.056 | 1.29  | 0.008 |
| 1419070_at   | cystin 1                                                                        | 1.8   | 0.191 | 1.91 | 0.001 | 1.06  | 0.752 | 1.39  | 0.032 | 1.4   | 0.474 |
| 1442436_at   | fructosamine 3 kinase                                                           | 1.1   | 0.987 | 1.91 | 0.007 | -1.34 | 0.184 | -1.02 | 0.612 | 1.58  | 0.100 |
| 1456326_at   | gene model 784, (NCBI)                                                          | 2.38  | 0.541 | 1.91 | 0.016 | 1.76  | 0.855 | -1.36 | 0.388 | 2.28  | 0.486 |
| 1425868_at   | Histone 2, H2bb                                                                 | 1.96  | 0.132 | 1.91 | 0.034 | 1.36  | 0.078 | 1.01  | 0.632 | 1.06  | 0.654 |
| 1419455_at   | interleukin 10 receptor, beta                                                   | 1.67  | 0.199 | 1.91 | 0.049 | 1.28  | 0.128 | 1.2   | 0.002 | 1.31  | 0.001 |
| 1455636_at   | limbic system-associated membrane protein                                       | 1.32  | 0.513 | 1.91 | 0.026 | 1.08  | 0.688 | 1.29  | 0.812 | -1.06 | 0.435 |
| 1454946_at   | myeloblastosis oncogene-like 2                                                  | 1.4   | 0.747 | 1.91 | 0.031 | 1.43  | 0.268 | 1.52  | 0.571 | 1.61  | 0.058 |
| 1418640_at   | sirtuin 1 ((silent mating type information regulation 2, homolog 1))            | 1.68  | 0.228 | 1.91 | 0.026 | 1.33  | 0.090 | 1.22  | 0.088 | 1.38  | 0.023 |
| 1455098_a_at | vitronectin                                                                     | 2.01  | 0.706 | 1.91 | 0.018 | 1.87  | 0.029 | 1.11  | 0.670 | 1.24  | 0.976 |
| 1430419_at   | RIKEN cDNA 2310031A07 gene                                                      | 1.23  | 0.776 | 1.9  | 0.033 | -1.69 | 0.154 | -1.25 | 0.006 | 1.12  | 0.385 |
| 1454354_at   | RIKEN cDNA 8030476L19 gene                                                      | -1.03 | 0.459 | 1.9  | 0.027 | 1.34  | 0.100 | 1     | 0.977 | 1.35  | 0.602 |
| 1459525_at   | Calcium binding atopy-related autoantigen 1                                     | 1.59  | 0.623 | 1.9  | 0.039 | 1.25  | 1.000 | -1    | 0.723 | 2     | 0.143 |
| 1418982_at   | CCAAT/enhancer binding protein (C/EBP), alpha                                   | 1.1   | 0.422 | 1.9  | 0.034 | 1.26  | 0.638 | 1.09  | 0.627 | 1.12  | 0.638 |
| 1452983_at   | centrosomal protein 57                                                          | 1.46  | 0.253 | 1.9  | 0.036 | 1.23  | 0.197 | 1.41  | 0.186 | 1.17  | 0.356 |
| 1425289_a_at | complement receptor 2                                                           | 2.77  | 0.249 | 1.9  | 0.045 | -1.08 | 0.448 | 1.44  | 0.522 | 1.93  | 0.413 |
| 1424724_a_at | DNA segment, Chr 16, ERATO Doi 472, expressed                                   | 1.67  | 0.326 | 1.9  | 0.009 | 1.06  | 0.248 | 1.36  | 0.022 | 1.38  | 0.054 |



|              |                                                                                  |               |       |       |      |       |       |       |       |       |       |       |
|--------------|----------------------------------------------------------------------------------|---------------|-------|-------|------|-------|-------|-------|-------|-------|-------|-------|
| 1422446_x_at | insulin II                                                                       | Ins2          | 2.58  | 0.131 | 1.9  | 0.003 | 1.35  | 0.793 | 1.7   | 0.832 | 1.49  | 0.942 |
| 1419128_at   | integrin alpha X                                                                 | Itgax         | 1.3   | 0.882 | 1.9  | 0.009 | -1.05 | 0.359 | 1.5   | 0.017 | -1.79 | 0.190 |
| 1421265_a_at | RNA binding motif protein 38                                                     | Rbm38         | 1.33  | 0.594 | 1.9  | 0.045 | 1.36  | 0.540 | 1.1   | 0.323 | 1.52  | 0.044 |
| 1443178_at   | ring finger protein 13                                                           | Rnf13         | 1.38  | 0.039 | 1.9  | 0.050 | 1.69  | 0.794 | 1.19  | 0.822 | 1.35  | 0.297 |
| 1446276_at   | RIKEN cDNA 2310008H04 gene                                                       | 2310008H04Rik | 1.54  | 0.189 | 1.89 | 0.028 | 1.04  | 0.872 | -1.16 | 0.545 | -1.22 | 0.240 |
| 1444568_at   | Actin related protein 2/3 complex, subunit 5                                     | Arpc5         | 2.03  | 0.478 | 1.89 | 0.040 | 2.54  | 0.108 | 2.25  | 0.115 | 2.71  | 0.679 |
| 1436560_at   | expressed sequence AW124694                                                      | AW124694      | 2.19  | 0.008 | 1.89 | 0.017 | 1.18  | 0.119 | 1.33  | 0.263 | 1.33  | 0.066 |
| 1426473_at   | DnaJ (Hsp40) homolog, subfamily C, member 9                                      | Dnajc9        | 1.24  | 0.075 | 1.89 | 0.007 | 1.12  | 0.448 | 1.23  | 0.082 | 1.2   | 0.008 |
| 1415945_at   | minichromosome maintenance deficient 5, cell division cycle                      | Mcm5          | 1.86  | 0.277 | 1.89 | 0.024 | 1.03  | 0.327 | 1.13  | 0.064 | 1.09  | 0.276 |
| 1450087_a_at | nucleolar and coiled-body phosphoprotein 1                                       | Nolc1         | 1.68  | 0.346 | 1.89 | 0.020 | -1    | 0.959 | 1.32  | 0.022 | 1.11  | 0.357 |
| 1450185_a_at | potassium inwardly-rectifying channel, subfamily J, member 1                     | Kcnj15        | 1.34  | 0.210 | 1.88 | 0.006 | 1.87  | 0.279 | 1.45  | 0.085 | 2.1   | 0.272 |
| 1433407_at   | minichromosome maintenance deficient 10 (S. cerevisiae)                          | Mcm10         | 1.91  | 0.373 | 1.88 | 0.031 | 1.51  | 0.546 | -1.14 | 0.574 | 1.06  | 0.921 |
| 1459137_at   | promyelocytic leukemia                                                           | Pml           | 1.22  | 0.245 | 1.88 | 0.004 | 1.32  | 0.160 | -1.3  | 0.268 | 1.6   | 0.099 |
| 1432564_at   | RIKEN cDNA 1700066C05 gene                                                       | 1700066C05Rik | 1.47  | 0.375 | 1.87 | 0.001 | 2.09  | 0.375 | -1.08 | 0.474 | -1.46 | 0.073 |
| 1446187_at   | RIKEN cDNA 4831416G18 gene                                                       | 4831416G18Rik | 1.25  | 0.730 | 1.87 | 0.043 | 1.14  | 0.642 | 1.79  | 0.647 | -1.18 | 0.406 |
| 1452796_at   | differentially expressed in FDCP 6                                               | Def6          | 1.45  | 0.151 | 1.87 | 0.024 | 1.22  | 0.002 | 1.24  | 0.012 | 1.4   | 0.012 |
| 1424679_at   | mab-21-like 1 (C. elegans)                                                       | Mab21l1       | 1.28  | 0.980 | 1.87 | 0.020 | 2.39  | 0.150 | 3.17  | 0.033 | -1.06 | 0.661 |
| 1450228_a_at | phosphatidylinositol-4-phosphate 5-kinase, type 1 gamma                          | Pip5k1c       | 2.41  | 0.137 | 1.87 | 0.031 | 2.79  | 0.092 | -1.41 | 0.263 | 1.19  | 0.820 |
| 1448370_at   | Unc-51 like kinase 1 (C. elegans)                                                | Ulk1          | 1.36  | 0.199 | 1.87 | 0.029 | 1.4   | 0.123 | 1.11  | 0.317 | 1.33  | 0.124 |
| 1453064_at   | RIKEN cDNA 5730466H23 gene                                                       | 5730466H23Rik | 1.18  | 0.316 | 1.86 | 0.038 | 1.17  | 0.545 | 1.02  | 0.891 | 1.42  | 0.118 |
| 1455334_at   | RIKEN cDNA 9830167H18 gene                                                       | 9830167H18Rik | 1.33  | 0.301 | 1.86 | 0.016 | 1.15  | 0.259 | 1.3   | 0.019 | 1.02  | 0.716 |
| 1448466_at   | cell division cycle associated 5                                                 | Cdc5          | 1.66  | 0.380 | 1.86 | 0.026 | 1.19  | 0.167 | 1.18  | 0.206 | 1.19  | 0.042 |
| 1421827_at   | delta-like 4 (Drosophila)                                                        | Dll4          | 1.54  | 0.467 | 1.86 | 0.025 | 1.12  | 0.908 | 1.24  | 0.453 | 1.18  | 0.816 |
| 1439323_a_at | mitogen activated protein kinase kinase kinase kinase 1 /// sir Map4k1 /// LOC67 | Map4k1        | 2.37  | 0.250 | 1.86 | 0.018 | 1.36  | 0.901 | 1.3   | 0.751 | -1.23 | 0.453 |
| 1444634_at   | NOL1/NOP2/Sun domain family 3                                                    | Nsun3         | 2.49  | 0.396 | 1.86 | 0.029 | 1.03  | 0.708 | 1.45  | 0.005 | 1.1   | 0.724 |
| 1423481_at   | RIO kinase 2 (yeast)                                                             | Rio2          | 1.49  | 0.271 | 1.86 | 0.017 | -1.01 | 0.820 | 1.2   | 0.018 | 1.13  | 0.194 |
| 1431175_at   | RIKEN cDNA 1810019D21 gene                                                       | 1810019D21Rik | 1.13  | 0.922 | 1.85 | 0.042 | 1.73  | 0.264 | 1.08  | 0.809 | 1.06  | 0.727 |
| 1430678_at   | RIKEN cDNA 5730457N03 gene                                                       | 5730457N03Rik | 2.11  | 0.191 | 1.85 | 0.020 | -1.28 | 0.235 | 1.28  | 0.365 | 1.55  | 0.766 |
| 1452301_at   | aldehyde dehydrogenase 3 family, member B1                                       | Aldh3b1       | -1.04 | 0.893 | 1.85 | 0.029 | -1.05 | 0.768 | -1.1  | 0.475 | 1.14  | 0.875 |
| 1447495_at   | fibronectin type 3 and ankyrin repeat domains 1                                  | Fank1         | 1.21  | 0.018 | 1.85 | 0.013 | -1.58 | 0.192 | 1.66  | 0.640 | 2.7   | 0.556 |
| 1422867_at   | granzyme G                                                                       | Gzmg          | 1.13  | 0.959 | 1.85 | 0.021 | 1.75  | 0.570 | -1.07 | 0.483 | -1.69 | 0.150 |
| 1423218_a_at | mitochondrial ribosomal protein L49                                              | MrpL49        | 1.31  | 0.017 | 1.85 | 0.007 | 1.24  | 0.006 | 1.36  | 0.009 | 1.29  | 0.096 |
| 1424985_a_at | SRY-box containing gene 10                                                       | Sox10         | 1.31  | 0.775 | 1.85 | 0.009 | 1.11  | 0.842 | -1.33 | 0.170 | 1.04  | 0.718 |
| 1424777_at   | WD repeat domain 21                                                              | Wdr21         | 1.17  | 0.585 | 1.85 | 0.024 | 1.07  | 0.557 | 1.33  | 0.270 | 1.42  | 0.078 |
| 1428469_a_at | DAZ interacting protein 1                                                        | Dzip1         | 1.44  | 0.295 | 1.84 | 0.014 | 1.51  | 0.126 | 1.34  | 0.133 | -1.07 | 0.509 |
| 1423998_at   | general transcription factor IIIC, polypeptide 5                                 | Gtf3c5        | 1.55  | 0.208 | 1.84 | 0.026 | 1.33  | 0.040 | 1.13  | 0.090 | 1.33  | 0.050 |
| 1442671_at   | Huntingtin interacting protein 2                                                 | Hip2          | 1.74  | 0.141 | 1.84 | 0.043 | 1.12  | 0.512 | 1.19  | 0.486 | -1.23 | 0.400 |
| 1456777_at   | maltase-glucoamylase                                                             | Mgam          | 3.07  | 0.046 | 1.84 | 0.022 | 1.3   | 0.456 | 1.11  | 0.811 | 1.08  | 0.859 |
| 1424692_at   | RIKEN cDNA 2810055F11 gene                                                       | 2810055F11Rik | 1.53  | 0.251 | 1.83 | 0.018 | 1.25  | 0.007 | 1.3   | 0.039 | 1.47  | 0.008 |
| 1416969_at   | G two S phase expressed protein 1                                                | Gtse1         | 1.23  | 0.069 | 1.83 | 0.000 | 1.19  | 0.188 | 1.17  | 0.038 | 1.43  | 0.030 |
| 1429110_a_at | NOL1/NOP2/Sun domain family, member 4                                            | Nsun4         | 1.51  | 0.097 | 1.83 | 0.026 | 1.47  | 0.012 | 1.46  | 0.012 | 1.38  | 0.086 |
| 1435632_at   | nuclear fragile X mental retardation protein interacting protein                 | Nufip2        | 1.98  | 0.267 | 1.83 | 0.040 | 1.13  | 0.169 | 1.2   | 0.098 | 1.02  | 0.776 |
| 1450259_a_at | signal transducer and activator of transcription 5A                              | Stat5a        | 1.67  | 0.404 | 1.83 | 0.044 | 1.23  | 0.147 | 1.22  | 0.085 | 1.39  | 0.004 |
| 1442629_at   | 5'-nucleotidase, cytosolic II                                                    | Nt5c2         | 2.24  | 0.060 | 1.82 | 0.000 | 1.27  | 0.695 | 1.22  | 0.097 | 1.2   | 0.298 |
| 1425271_at   | proteasome (prosome, macropain) 26S subunit, ATPase 3, ir                        | Psmc3ip       | 1.41  | 0.628 | 1.82 | 0.008 | 1.21  | 0.247 | 1.09  | 0.364 | 1.21  | 0.138 |
| 1425602_a_at | rabaptin, RAB GTPase binding effector protein 2                                  | Rabep2        | 1.49  | 0.091 | 1.82 | 0.023 | 1.28  | 0.122 | 1.36  | 0.076 | 1.32  | 0.237 |
| 1441585_at   | Spastic paraplegia 7 homolog (human)                                             | Spg7          | -1.31 | 0.176 | 1.82 | 0.002 | -1.24 | 0.335 | 1.36  | 0.700 | 1.59  | 0.053 |
| 1447657_s_at | synaptopodin 2-like                                                              | Synpo2l       | 1.1   | 0.893 | 1.82 | 0.027 | 1.17  | 0.816 | 1.44  | 0.005 | 1.46  | 0.229 |
| 1444254_at   | tensin 4                                                                         | Tns4          | 1.4   | 0.487 | 1.82 | 0.011 | -1.13 | 0.347 | -1.07 | 0.554 | 2.37  | 0.303 |
| 1420891_at   | wingless-related MMTV integration site 7B                                        | Wnt7b         | -1.06 | 0.447 | 1.82 | 0.043 | -1.91 | 0.128 | 1.2   | 0.947 | 1.06  | 0.935 |
| 1428866_at   | RIKEN cDNA 2810037O22 gene                                                       | 2810037O22Rik | 1.93  | 0.543 | 1.81 | 0.031 | 1.62  | 0.993 | 1.38  | 0.198 | 1.11  | 0.467 |
| 1423578_at   | procollagen, type XI, alpha 2                                                    | Col11a2       | 2.04  | 0.018 | 1.81 | 0.043 | -2.01 | 0.119 | 1.06  | 0.949 | 2.92  | 0.763 |
| 1448823_at   | chemokine (C-X-C motif) ligand 12                                                | Cxcl12        | 2.32  | 0.020 | 1.81 | 0.034 | -1.26 | 0.094 | -1.1  | 0.083 | 1.05  | 0.611 |
| 1444263_at   | Enhancer of zeste homolog 2 (Drosophila)                                         | Ezh2          | 1.56  | 0.482 | 1.81 | 0.031 | 1.36  | 0.639 | 1.64  | 0.299 | -1.5  | 0.311 |
| 1436166_at   | storkhead box 2                                                                  | Stox2         | 1.51  | 0.061 | 1.81 | 0.008 | 1.01  | 0.667 | -1.27 | 0.031 | -1.78 | 0.007 |
| 1428821_at   | 1-acylglycerol-3-phosphate O-acyltransferase 2 (lysophosphatidyl                 | Agpat2        | 1.51  | 0.249 | 1.8  | 0.047 | 1.21  | 0.012 | 1.18  | 0.042 | 1.26  | 0.006 |
| 1445758_at   | CDNA sequence BC049816                                                           | BC049816      | 1.88  | 0.009 | 1.8  | 0.021 | -1.03 | 0.688 | 1.12  | 0.933 | 1.04  | 0.769 |
| 1448886_at   | GATA binding protein 3                                                           | Gata3         | 1.33  | 0.086 | 1.8  | 0.017 | 6.7   | 0.196 | 1.21  | 0.857 | -1.11 | 0.246 |

|              |                                                                                    |                   |       |       |      |       |       |       |       |       |       |       |
|--------------|------------------------------------------------------------------------------------|-------------------|-------|-------|------|-------|-------|-------|-------|-------|-------|-------|
| 1449204_at   | gap junction membrane channel protein beta 5                                       | Gjb5              | 1.76  | 0.084 | 1.8  | 0.043 | 1.35  | 0.079 | -1.14 | 0.279 | 1.74  | 0.195 |
| 1418825_at   | immunity-related GTPase family, M                                                  | Irgm              | 1.22  | 0.160 | 1.8  | 0.032 | 1.22  | 0.061 | -1.17 | 0.044 | 1.34  | 0.116 |
| 1417838_at   | spermiogenesis specific transcript on the Y 2 /// similar to RIK Ssty2 /// LOC3821 |                   | 1.65  | 0.511 | 1.8  | 0.048 | 1.24  | 0.129 | -1.07 | 0.686 | 1.04  | 0.772 |
| 1432489_a_at | RIKEN cDNA 2410187C16 gene                                                         | 2410187C16Rik     | 1.53  | 0.415 | 1.79 | 0.045 | 1.27  | 0.283 | 1.07  | 0.618 | 1.33  | 0.459 |
| 1457693_a_at | RIKEN cDNA 6430537H07 gene                                                         | 6430537H07Rik     | 1.19  | 0.765 | 1.79 | 0.041 | -1.1  | 0.374 | 1.69  | 0.339 | -1.3  | 0.124 |
| 1436630_at   | Aquaporin 11                                                                       | Aqp11             | 1.52  | 0.761 | 1.79 | 0.029 | 1.36  | 0.451 | -1.41 | 0.032 | 1.13  | 0.274 |
| 1427718_a_at | transformed mouse 3T3 cell double minute 2                                         | Mdm2              | 1.1   | 0.296 | 1.79 | 0.000 | 1.17  | 0.109 | 1.14  | 0.025 | 1.25  | 0.199 |
| 1422055_at   | midline 1                                                                          | Mid1              | 1.21  | 0.615 | 1.79 | 0.002 | -1.56 | 0.155 | 1.83  | 0.699 | 1.12  | 0.526 |
| 1443500_at   | Myeloid/lymphoid or mixed lineage-leukemia translocation to                        | Mllt10            | 1.18  | 0.076 | 1.79 | 0.012 | -1.01 | 0.837 | 1.17  | 0.603 | 1.06  | 0.684 |
| 1421131_a_at | zinc finger protein 111                                                            | Zfp111            | 1.07  | 0.795 | 1.79 | 0.002 | 1.13  | 0.235 | 1.08  | 0.939 | 1.48  | 0.035 |
| 1449607_at   | RIKEN cDNA A230070E04 gene                                                         | A230070E04Rik     | 1.37  | 0.371 | 1.78 | 0.016 | 1.2   | 0.646 | -1.09 | 0.235 | 1.35  | 0.654 |
| 1425176_at   | C1q-like 3                                                                         | C1q3              | 1.43  | 0.042 | 1.78 | 0.034 | -1.28 | 0.240 | 1.15  | 0.315 | 1.34  | 0.288 |
| 1454112_a_at | centrosomal protein 27                                                             | Cep27             | 1.33  | 0.301 | 1.78 | 0.045 | 1.09  | 0.276 | 1.23  | 0.045 | 1.13  | 0.567 |
| 1444673_at   | RIKEN cDNA E030031F02 gene                                                         | E030031F02Rik     | 1.25  | 0.371 | 1.78 | 0.015 | 1.57  | 0.809 | 1.56  | 0.874 | -1.09 | 0.565 |
| 1458729_at   | FK506 binding protein 4                                                            | Fkbp4             | 1.93  | 0.006 | 1.78 | 0.024 | 1.43  | 0.532 | 1.13  | 0.236 | 1.83  | 0.320 |
| 1450448_at   | stanniocalcin 1                                                                    | Stc1              | 1.39  | 0.078 | 1.78 | 0.036 | 1.42  | 0.325 | 1.47  | 0.084 | 1.92  | 0.048 |
| 1441698_at   | RIKEN cDNA 2410025L10 gene                                                         | 2410025L10Rik     | 1.6   | 0.014 | 1.77 | 0.048 | 1.11  | 0.929 | 1.37  | 0.442 | -1.16 | 0.597 |
| 1432220_at   | RIKEN cDNA 4933430L12 gene                                                         | 4933430L12Rik     | 1.41  | 0.062 | 1.77 | 0.039 | -1.04 | 0.404 | 1.27  | 0.453 | 1.23  | 0.585 |
| 1449907_at   | beta-carotene 15,15'-monooxygenase                                                 | Bcmo1             | 1.34  | 0.892 | 1.77 | 0.044 | -1.32 | 0.345 | 1.1   | 0.784 | 1.3   | 0.427 |
| 1423711_at   | NADH dehydrogenase (ubiquinone) 1 alpha subcomplex, as                             | Ndufaf1           | 1.4   | 0.318 | 1.77 | 0.017 | 1.19  | 0.003 | 1.23  | 0.020 | 1.29  | 0.019 |
| 1456006_at   | BCL2-like 11 (apoptosis facilitator)                                               | Bcl2l11           | 1.12  | 0.033 | 1.76 | 0.037 | -1.12 | 0.348 | 1.28  | 0.092 | 1.45  | 0.081 |
| 1431843_a_at | nuclear factor of kappa light polypeptide gene enhancer in B-                      | Nfkbie            | 1.9   | 0.195 | 1.76 | 0.033 | 1.19  | 0.970 | 1.14  | 0.485 | 1.49  | 0.056 |
| 1434333_a_at | protein kinase D2                                                                  | Prkd2             | 1.14  | 0.337 | 1.76 | 0.021 | 1.28  | 0.116 | 1.09  | 0.604 | 1.41  | 0.188 |
| 1449127_at   | selectin, platelet (p-selectin) ligand                                             | Selpl             | -1.05 | 0.616 | 1.76 | 0.019 | 1.1   | 0.900 | 1.34  | 0.197 | 1.72  | 0.218 |
| 1435452_at   | transmembrane protein 20                                                           | Tmem20            | 1.9   | 0.073 | 1.76 | 0.005 | -1.16 | 0.542 | -1.15 | 0.356 | 1.31  | 0.277 |
| 1450231_a_at | baculoviral IAP repeat-containing 4                                                | Birc4             | -1.06 | 0.272 | 1.75 | 0.020 | 1.32  | 0.071 | 1.19  | 0.427 | 1.03  | 0.595 |
| 1429025_a_at | hexamethylene bis-acetamide inducible 2                                            | Hexim2            | 1.87  | 0.233 | 1.75 | 0.025 | -1.22 | 0.222 | 3.29  | 0.089 | 1.73  | 0.282 |
| 1421196_at   | protein tyrosine phosphatase, non-receptor type 11                                 | Ptpn11            | 1.78  | 0.002 | 1.75 | 0.006 | -1.03 | 0.751 | 1.09  | 0.547 | 1.05  | 0.614 |
| 1425352_at   | REST corepressor 3                                                                 | Rcor3             | 3.09  | 0.165 | 1.75 | 0.031 | -1.41 | 0.097 | -1.05 | 0.631 | 1.11  | 0.123 |
| 1443158_at   | Sex comb on midleg homolog 1                                                       | Scmh1             | 1.76  | 0.189 | 1.75 | 0.046 | 1.32  | 0.220 | 1.3   | 0.035 | -1.01 | 0.908 |
| 1439385_x_at | Solute carrier family 13 (sodium-dependent dicarboxylate tra                       | Slc13a3           | 1.75  | 0.389 | 1.75 | 0.041 | -1.01 | 0.982 | 5.04  | 0.075 | 1.04  | 0.511 |
| 1448940_at   | tripartite motif protein 21                                                        | Trim21            | 2.57  | 0.753 | 1.75 | 0.004 | 2.97  | 0.013 | 1.14  | 0.363 | 1.81  | 0.015 |
| 1428932_at   | tetratricopeptide repeat domain 21A                                                | ttc21a            | 1.19  | 0.875 | 1.75 | 0.027 | -1.08 | 0.470 | -1.59 | 0.135 | -1.07 | 0.939 |
| 1421320_a_at | queuine tRNA-ribosyltransferase domain containing 1                                | Qtrtd1            | 1.08  | 0.401 | 1.74 | 0.035 | -1.08 | 0.961 | 2.26  | 0.105 | 1.11  | 0.867 |
| 1426604_at   | ribonuclease L (2', 5'-oligoadenylate synthetase-dependen                          | Rnasel            | 1.47  | 0.291 | 1.74 | 0.032 | 2.45  | 0.269 | 1.46  | 0.459 | 1.54  | 0.400 |
| 1426337_a_at | TEA domain family member 4                                                         | Tead4             | 1.49  | 0.173 | 1.74 | 0.016 | -1.21 | 0.162 | -1.01 | 0.696 | 1.35  | 0.316 |
| 1434752_at   | zinc finger protein 207                                                            | Zfp207            | 1.91  | 0.016 | 1.74 | 0.005 | 1.45  | 0.244 | 1.23  | 0.481 | -1.09 | 0.269 |
| 1418027_at   | exonuclease 1                                                                      | Exo1              | 1.28  | 0.025 | 1.73 | 0.002 | 1.24  | 0.305 | 1.42  | 0.078 | -1    | 0.859 |
| 1426871_at   | F-box only protein 33                                                              | Fbxo33            | 1.3   | 0.196 | 1.73 | 0.044 | 1.15  | 0.158 | 1.25  | 0.056 | 1.38  | 0.163 |
| 1431506_s_at | peptidyl prolyl isomerase H /// similar to peptidyl prolyl isomer                  | Ppih /// LOC4330f | 1.61  | 0.164 | 1.73 | 0.048 | 1.09  | 0.245 | 1.21  | 0.013 | 1.04  | 0.680 |
| 1460168_at   | stem-loop binding protein                                                          | Slbp              | 1.2   | 0.071 | 1.73 | 0.002 | 1.27  | 0.009 | 1.23  | 0.002 | 1.28  | 0.092 |
| 1426415_a_at | tripartite motif protein 25                                                        | Trim25            | 1.15  | 0.791 | 1.73 | 0.023 | 1.3   | 0.964 | 1.1   | 0.329 | 1.16  | 0.012 |
| 1455674_at   | WD repeat domain 76                                                                | Wdr76             | 1.16  | 0.409 | 1.73 | 0.003 | 1.59  | 0.144 | 1.05  | 0.869 | 1.41  | 0.618 |
| 1458863_at   | RIKEN cDNA 6330415G19 gene                                                         | 6330415G19Rik     | 1.51  | 0.144 | 1.72 | 0.010 | 1.45  | 0.007 | 1.34  | 0.123 | 2.68  | 0.024 |
| 1427081_at   | RIKEN cDNA A630072M18 gene                                                         | A630072M18Rik     | 1.37  | 0.028 | 1.72 | 0.008 | 1.41  | 0.185 | 1.17  | 0.040 | 1.4   | 0.031 |
| 1426894_s_at | RIKEN cDNA C230093N12 gene                                                         | C230093N12Rik     | 1.27  | 0.315 | 1.72 | 0.038 | 1.43  | 0.108 | 1.71  | 0.000 | 1.61  | 0.089 |
| 1421688_a_at | chemokine (C-C motif) ligand 1                                                     | Ccl1              | 1.19  | 0.987 | 1.72 | 0.044 | 1.53  | 0.739 | -1.14 | 0.498 | -1.44 | 0.156 |
| 1454648_s_at | DNA segment, Chr 10, Wayne State University 102, express                           | D10Wsu102e        | 1.35  | 0.463 | 1.72 | 0.014 | 1.18  | 0.012 | 1.38  | 0.006 | 1.3   | 0.026 |
| 1449176_a_at | deoxycytidine kinase                                                               | Dck               | 1.24  | 0.631 | 1.72 | 0.018 | 1.3   | 0.234 | -1.05 | 0.493 | 1.57  | 0.050 |
| 1426290_at   | DIM1 dimethyladenosine transferase 1-like (S. cerevisiae)                          | Dimt1             | 1.33  | 0.278 | 1.72 | 0.009 | 1.07  | 0.253 | 1.07  | 0.403 | 1.19  | 0.111 |
| 1432181_s_at | endothelial cell growth factor 1 (platelet-derived)                                | Ecgf1             | 1.17  | 0.185 | 1.72 | 0.003 | 1.5   | 0.155 | 1.5   | 0.006 | 1.67  | 0.016 |
| 1440742_at   | Enhancer of polycomb homolog 1 (Drosophila)                                        | Epc1              | 1.77  | 0.122 | 1.72 | 0.013 | 1.41  | 0.509 | 1.15  | 0.392 | 1.62  | 0.076 |
| 1430311_at   | Myristoylated alanine rich protein kinase C substrate                              | Marcks            | 1.13  | 0.722 | 1.72 | 0.001 | 1.35  | 0.038 | 1.42  | 0.646 | 1.12  | 0.888 |
| 1423524_at   | microtubule associated serine/threonine kinase-like                                | Mastl             | 1.51  | 0.047 | 1.72 | 0.025 | 1.06  | 0.586 | 1.26  | 0.101 | 1.01  | 0.824 |
| 1421144_at   | retinitis pigmentosa GTPase regulator interacting protein 1                        | Rpgrip1           | 1.67  | 0.038 | 1.72 | 0.036 | -1.02 | 0.571 | 1.17  | 0.016 | 1.03  | 0.995 |
| 1424399_at   | uridine-cytidine kinase 1                                                          | Uck1              | 1.37  | 0.314 | 1.72 | 0.021 | 1.01  | 0.769 | 1.12  | 0.015 | 1.17  | 0.075 |
| 1429268_at   | RIKEN cDNA 2610318N02 gene                                                         | 2610318N02Rik     | 2.21  | 0.003 | 1.71 | 0.022 | -1.18 | 0.469 | 1.97  | 0.024 | 1.27  | 0.089 |
| 1454421_at   | RIKEN cDNA 4930423D22 gene                                                         | 4930423D22Rik     | 1.23  | 0.518 | 1.71 | 0.036 | -1.45 | 0.241 | -2.56 | 0.001 | -1.09 | 0.384 |

|              |                                                               |                  |       |       |      |       |       |        |       |       |       |       |
|--------------|---------------------------------------------------------------|------------------|-------|-------|------|-------|-------|--------|-------|-------|-------|-------|
| 1451266_at   | mitochondrial ribosomal protein L50                           | Mrpl50           | 1.3   | 0.341 | 1.71 | 0.015 | 1.19  | 0.109  | 1.23  | 0.125 | 1.04  | 0.917 |
| 1422970_at   | Max dimerization protein 3                                    | Mxd3             | 1.47  | 0.050 | 1.71 | 0.010 | -1    | 0.697  | 1.19  | 0.350 | 1.23  | 0.366 |
| 1451767_at   | neutrophil cytosolic factor 1                                 | Ncf1             | 1.08  | 0.434 | 1.71 | 0.039 | 1.29  | 0.694  | 1.78  | 0.604 | 2.6   | 0.008 |
| 1423044_at   | proline synthetase co-transcribed                             | Prosc            | 1.36  | 0.306 | 1.71 | 0.013 | 1.12  | 0.034  | 1.26  | 0.020 | 1.19  | 0.005 |
| 1429739_a_at | zinc finger protein 278                                       | Zfp278           | 1.09  | 0.620 | 1.71 | 0.019 | 1.26  | 0.025  | 1.25  | 0.028 | 1.52  | 0.009 |
| 1454087_at   | zinc fingerprotein 618                                        | Zfp618           | 1.07  | 0.937 | 1.71 | 0.014 | -1.19 | 0.490  | 1.17  | 0.973 | -1.06 | 0.610 |
| 1450735_at   | RIKEN cDNA 1810003N24 gene                                    | 1810003N24Rik    | 1.42  | 0.210 | 1.7  | 0.045 | 1.07  | 0.232  | 1.17  | 0.016 | 1.05  | 0.492 |
| 1459607_at   | RIKEN cDNA 2900001O04 gene                                    | 2900001O04Rik    | 1.16  | 0.810 | 1.7  | 0.016 | 1.3   | 0.182  | 1.13  | 0.681 | 1.28  | 0.141 |
| 1424091_at   | expressed sequence AI449175                                   | AI449175         | 1.75  | 0.837 | 1.7  | 0.006 | 1.28  | 0.187  | 1.04  | 0.569 | 1.29  | 0.445 |
| 1446889_at   | DNA segment, Chr 2, ERATO Doi 105, expressed                  | D2Erd105e        | 1.78  | 0.193 | 1.7  | 0.032 | 1.1   | 0.854  | 2.34  | 0.360 | -1.17 | 0.249 |
| 1442684_x_at | high mobility group 20A                                       | Hmg20a           | 1.69  | 0.165 | 1.7  | 0.004 | 1.25  | 0.411  | 1.1   | 0.895 | 1.12  | 0.574 |
| 1451186_at   | interferon stimulated exonuclease gene 20-like 1              | lsg20l1          | 1.21  | 0.847 | 1.7  | 0.012 | -1.17 | 0.308  | 1.37  | 0.053 | -1.01 | 0.757 |
| 1427679_at   | large tumor suppressor                                        | Lats1            | 1.57  | 0.261 | 1.7  | 0.027 | 1.04  | 0.992  | 1.4   | 0.034 | 1.07  | 0.815 |
| 1453119_at   | OTU domain containing 1                                       | Otud1            | 1.36  | 0.140 | 1.7  | 0.002 | 1.6   | 0.116  | 1.1   | 0.400 | 1.33  | 0.088 |
| 1428615_at   | purinergic receptor P2Y, G-protein coupled, 5                 | P2ry5            | 1.24  | 0.018 | 1.7  | 0.043 | 1.44  | 0.019  | 1.35  | 0.009 | 1.52  | 0.011 |
| 1420502_at   | spermidine/spermine N1-acetyl transferase 1                   | Sat1             | 1.29  | 0.135 | 1.7  | 0.006 | 1.38  | 0.014  | 1.27  | 0.011 | 1.32  | 0.006 |
| 1456971_at   | solute carrier family 1 (glutamate transporter), member 7     | Slc1a7           | 1.08  | 0.636 | 1.7  | 0.034 | 1.78  | 0.542  | 1.97  | 0.798 | 1.22  | 0.863 |
| 1451080_at   | ubiquitin specific peptidase 1                                | Usp1             | 1.38  | 0.036 | 1.7  | 0.011 | 1.28  | 0.022  | 1.17  | 0.029 | 1.25  | 0.042 |
| 1439563_at   | zinc finger protein 3                                         | Zfp3             | 1.43  | 0.974 | 1.7  | 0.003 | -1.24 | 0.186  | 1.14  | 0.376 | 1     | 0.994 |
| 1453610_at   | RIKEN cDNA 4931406B18 gene                                    | 4931406B18Rik    | 1.1   | 0.502 | 1.69 | 0.022 | 1.68  | 0.353  | -1.41 | 0.214 | 1.03  | 0.711 |
| 1424638_at   | cyclin-dependent kinase inhibitor 1A (P21)                    | Cdkn1a           | 1.16  | 0.333 | 1.69 | 0.005 | 1.25  | 0.005  | 1.21  | 0.002 | 1.29  | 0.003 |
| 1446080_at   | Cut-like 2 (Drosophila)                                       | Cutl2            | 1.03  | 0.922 | 1.69 | 0.018 | -1.13 | 0.354  | 1.33  | 0.089 | 1.03  | 0.890 |
| 1418898_at   | lin-7 homolog C (C. elegans)                                  | Lin7c            | 1.32  | 0.281 | 1.69 | 0.018 | 1.08  | 0.103  | 1.24  | 0.000 | 1.14  | 0.323 |
| 1426533_at   | nucleolar protein 5A                                          | Nol5a            | 1.43  | 0.428 | 1.69 | 0.040 | 1.27  | 0.001  | 1.43  | 0.008 | 1.2   | 0.087 |
| 1427518_at   | cDNA sequence D10627                                          | D10627           | 1.74  | 0.287 | 1.68 | 0.035 | 1.24  | 0.131  | 1.07  | 0.502 | 1.04  | 0.726 |
| 1452658_at   | KRR1, small subunit (SSU) processome component, homolog       | Krr1             | 1.21  | 0.670 | 1.68 | 0.043 | 1.12  | 0.534  | 1.26  | 0.065 | 1.07  | 0.709 |
| 1422009_at   | ATPase, Na+/K+ transporting, beta 2 polypeptide               | Atp1b2           | 1.37  | 0.097 | 1.67 | 0.038 | 1.12  | 0.676  | 1.42  | 0.114 | 1.29  | 0.269 |
| 1428069_at   | cell division cycle associated 7                              | Cdca7            | 1.26  | 0.680 | 1.67 | 0.007 | 1.49  | 0.040  | 1.09  | 0.294 | 1.37  | 0.010 |
| 1424620_at   | DNA segment, Chr 13, Wayne State University 177, expressed    | D13Wsu177e       | 1.39  | 0.308 | 1.67 | 0.009 | 1.07  | 0.017  | 1.17  | 0.028 | 1.13  | 0.397 |
| 1415677_at   | dehydrogenase/reductase (SDR family) member 1                 | Dhrs1            | 1.82  | 0.243 | 1.67 | 0.034 | 1.17  | 1.8251 | 1.1   | 0.060 | 1.09  | 0.301 |
| 1426103_a_at | estrogen receptor 2 (beta)                                    | Esr2             | 1.77  | 0.483 | 1.67 | 0.002 | 1.14  | 0.644  | 2.19  | 0.704 | 1.46  | 0.210 |
| 1449390_at   | G patch domain containing 4                                   | Gpatc4           | 1.28  | 0.223 | 1.67 | 0.025 | 1.23  | 0.362  | 1.08  | 0.788 | 1.11  | 0.620 |
| 1422527_at   | histocompatibility 2, class II, locus DMA                     | H2-DMA           | 1.2   | 0.340 | 1.67 | 0.039 | -1.09 | 0.620  | 1     | 0.924 | 1.37  | 0.284 |
| 1451552_at   | Similar to lipoyltransferase                                  | MGC28431         | 1.43  | 0.443 | 1.67 | 0.015 | 1.25  | 0.046  | 1.42  | 0.027 | 1.44  | 0.103 |
| 1423211_at   | nucleolar protein family A, member 3                          | Nola3            | 1.51  | 0.167 | 1.67 | 0.043 | 1.22  | 0.191  | 1.12  | 0.059 | 1.25  | 0.119 |
| 1417273_at   | pyruvate dehydrogenase kinase, isoenzyme 4                    | Pdk4             | 1.35  | 0.061 | 1.67 | 0.002 | 1.42  | 0.373  | -1.06 | 0.748 | 1.51  | 0.100 |
| 1437563_at   | PHD finger protein 20-like 1                                  | Phf20l1          | 1.48  | 0.011 | 1.67 | 0.034 | 1.12  | 0.719  | 1.02  | 0.876 | 1.05  | 0.734 |
| 1422628_at   | RIKEN cDNA 4632417K18 gene                                    | 4632417K18Rik    | 1.29  | 0.065 | 1.66 | 0.013 | 1.21  | 0.004  | 1.27  | 0.002 | 1.23  | 0.018 |
| 1430520_at   | copine VIII                                                   | Cpne8            | 1.71  | 0.304 | 1.66 | 0.036 | 1.17  | 0.516  | 1.01  | 0.927 | 1.42  | 0.019 |
| 1450939_at   | ectonucleoside triphosphate diphosphohydrolase 1              | Entpd1           | 1.72  | 0.581 | 1.66 | 0.048 | -1.26 | 0.273  | -1.43 | 0.202 | 1.05  | 0.455 |
| 1460600_at   | similar to ubiquitin-conjugating enzyme E2Q (putative) 2      | LOC245350        | 1.13  | 0.686 | 1.66 | 0.009 | 1.07  | 0.103  | 1.12  | 0.089 | 1.18  | 0.155 |
| 1452132_at   | TLC domain containing 1                                       | Tlcd1            | 1.3   | 0.230 | 1.66 | 0.043 | 1.26  | 0.157  | 1.2   | 0.076 | 1.34  | 0.023 |
| 1439503_at   | zinc finger protein 28                                        | Zfp28            | 1.13  | 0.629 | 1.66 | 0.006 | 1.7   | 0.006  | 1.16  | 0.111 | -1.03 | 0.707 |
| 1449391_at   | zinc finger protein 37                                        | Zfp37            | 1.6   | 0.298 | 1.66 | 0.042 | 1.51  | 0.276  | 1.34  | 0.002 | 1.41  | 0.024 |
| 1424548_at   | zinc finger, CCCH-type with G patch domain                    | Zgpat            | 1.14  | 0.060 | 1.66 | 0.014 | 1.26  | 0.364  | 1.19  | 0.057 | 1.39  | 0.133 |
| 1451288_s_at | RIKEN cDNA 1810043G02 gene                                    | 1810043G02Rik    | 1.58  | 0.359 | 1.65 | 0.007 | 1.33  | 0.308  | 1.03  | 0.973 | 1.32  | 0.197 |
| 1435979_a_at | myosin XVB                                                    | Myo15b           | 1.17  | 0.253 | 1.65 | 0.042 | 1.28  | 0.796  | 1.11  | 0.886 | -1.04 | 0.723 |
| 1455840_at   | Rap guanine nucleotide exchange factor (GEF) 5                | Rapgef5          | 1.17  | 0.784 | 1.65 | 0.042 | 1.69  | 0.633  | 2.27  | 0.023 | -1.64 | 0.078 |
| 1421237_at   | thymopoietin                                                  | Tmpo             | 4.59  | 0.386 | 1.65 | 0.006 | -1.01 | 0.858  | 1.33  | 0.097 | 1.26  | 0.442 |
| 1430870_at   | RIKEN cDNA 4930442P19 gene                                    | 4930442P19Rik    | -1.28 | 0.390 | 1.64 | 0.033 | -1.34 | 0.129  | 1.57  | 0.533 | -2.05 | 0.061 |
| 1433577_at   | RIKEN cDNA A730017C20 gene                                    | A730017C20Rik    | 1.91  | 0.002 | 1.64 | 0.018 | 1.83  | 0.096  | 1.19  | 0.786 | 1.12  | 0.773 |
| 1422715_s_at | acid phosphatase 1, soluble /// similar to acid phosphatase 1 | Acp1 /// LOC6312 | 1.51  | 0.087 | 1.64 | 0.010 | 1.03  | 0.657  | -1.02 | 0.399 | 1.1   | 0.336 |
| 1424528_at   | cell growth regulator with EF hand domain 1                   | Cgref1           | 1.14  | 0.577 | 1.64 | 0.001 | 1.22  | 0.024  | 1.13  | 0.280 | 1.16  | 0.020 |
| 1455259_a_at | RIKEN cDNA D530033C11 gene                                    | D530033C11Rik    | 1.46  | 0.530 | 1.64 | 0.025 | 1.07  | 0.645  | 1.23  | 0.101 | 1.13  | 0.801 |
| 1416716_at   | embryonal Fyn-associated substrate                            | Efs              | 1.25  | 0.208 | 1.64 | 0.046 | 1.09  | 0.016  | 1.04  | 0.453 | 1.3   | 0.096 |
| 1416555_at   | etoposide induced 2.4 mRNA                                    | Ei24             | 1.18  | 0.276 | 1.64 | 0.007 | 1.11  | 0.125  | 1.12  | 0.007 | 1.17  | 0.021 |
| 1454835_at   | EPM2A (laforin) interacting protein 1                         | Epm2aip1         | 1.21  | 0.167 | 1.64 | 0.030 | 1.1   | 0.375  | 1.34  | 0.102 | 1.5   | 0.123 |
| 1436601_at   | F-box protein 46                                              | Fbxo46           | 1.36  | 0.190 | 1.64 | 0.024 | -1.07 | 0.675  | -1.06 | 0.564 | 1.23  | 0.602 |

|              |                                                                |                      |       |       |      |       |       |       |       |       |       |       |
|--------------|----------------------------------------------------------------|----------------------|-------|-------|------|-------|-------|-------|-------|-------|-------|-------|
| 1460159_at   | myb-like, SWIRM and MPN domains 1                              | Mysm1                | 2.26  | 0.055 | 1.64 | 0.050 | 1.76  | 0.721 | 1.53  | 0.056 | -1.35 | 0.063 |
| 1419058_at   | polymerase (RNA) I polypeptide E                               | Polr1e               | 1.3   | 0.129 | 1.64 | 0.012 | 1.13  | 0.472 | 1.13  | 0.212 | 1.41  | 0.115 |
| 1451301_at   | tropomodulin 2                                                 | Tmod2                | 1     | 0.932 | 1.64 | 0.034 | -1.01 | 0.645 | 1.1   | 0.700 | 1.94  | 0.568 |
| 1448821_at   | tyrosinase                                                     | Tyr                  | 1.15  | 0.890 | 1.64 | 0.008 | 1.57  | 0.059 | 1.02  | 0.584 | 1.34  | 0.460 |
| 1429586_at   | RIKEN cDNA 4930558N01 gene                                     | 4930558N01Rik        | 1.32  | 0.065 | 1.63 | 0.033 | -1.02 | 0.672 | 1.12  | 0.357 | -1.02 | 0.628 |
| 1449513_at   | a disintegrin and metallopeptidase domain 24 (testase 1)       | Adam24               | 1.4   | 0.550 | 1.63 | 0.019 | 1.39  | 0.883 | 1.33  | 0.204 | 1.04  | 0.929 |
| 1435863_at   | COMM domain containing 6                                       | Comm6                | 1.44  | 0.059 | 1.63 | 0.012 | 1.12  | 0.038 | 1.2   | 0.044 | 1.26  | 0.012 |
| 1457806_at   | dedicator of cyto-kinesis 1                                    | Dock1                | 1.47  | 0.114 | 1.63 | 0.010 | 1.21  | 0.630 | 2.41  | 0.566 | 1.42  | 0.646 |
| 1451633_a_at | guanine nucleotide binding protein (G protein), gamma trans    | Gngt1                | -1.09 | 0.496 | 1.63 | 0.029 | 1.57  | 0.984 | -1.11 | 0.371 | 1.13  | 0.774 |
| 1455238_at   | melanoma associated antigen (mutated) 1-like 1                 | Mum11                | 1.36  | 0.100 | 1.63 | 0.045 | 1.46  | 0.009 | 1.4   | 0.011 | 1.1   | 0.240 |
| 1428040_at   | one cut domain, family member 3                                | Onecut3              | 1.42  | 0.437 | 1.63 | 0.012 | 1.11  | 0.937 | -1.09 | 0.449 | -1.05 | 0.411 |
| 1429216_at   | progesterin and adipoQ receptor family member III              | Paqr3                | 1.12  | 0.404 | 1.63 | 0.031 | 1.22  | 0.132 | -1.1  | 0.274 | 1.15  | 0.373 |
| 1427094_at   | polymerase (DNA directed), epsilon 2 (p59 subunit)             | Pole2                | 1.28  | 0.196 | 1.63 | 0.037 | 1.23  | 0.052 | 1.16  | 0.061 | 1.32  | 0.087 |
| 1436300_at   | receptor interacting protein kinase 5                          | Ripk5                | 1.48  | 0.152 | 1.63 | 0.042 | 1.11  | 0.108 | 1.1   | 0.008 | 1.03  | 0.852 |
| 1451803_a_at | vascular endothelial growth factor B                           | Vegfb                | 1.47  | 0.178 | 1.63 | 0.042 | 1.04  | 0.737 | 1.07  | 0.594 | -1.35 | 0.114 |
| 1447401_at   | VW domain binding protein 11                                   | Wbp11                | 1.44  | 0.085 | 1.63 | 0.032 | 1.09  | 0.763 | 1.4   | 0.996 | -1.87 | 0.165 |
| 1434697_at   | RIKEN cDNA 1110001P04 gene                                     | 1110001P04Rik        | 1.22  | 0.127 | 1.62 | 0.013 | 1.13  | 0.241 | 1.07  | 0.108 | 1.22  | 0.004 |
| 1423100_at   | FBJ osteosarcoma oncogene                                      | Fos                  | -1.01 | 0.953 | 1.62 | 0.005 | 1.36  | 0.029 | 1.46  | 0.003 | 1.53  | 0.003 |
| 1441295_at   | lectin, mannose-binding 2-like                                 | Lman2l               | 1.07  | 0.807 | 1.62 | 0.040 | -1.03 | 0.854 | -1.08 | 0.300 | -1.02 | 0.705 |
| 1416638_at   | sal-like 2 (Drosophila)                                        | Sall2                | 1.08  | 0.786 | 1.62 | 0.014 | 1.26  | 0.049 | -1.01 | 0.778 | 1.33  | 0.393 |
| 1429260_at   | RIKEN cDNA 1810014B01 gene                                     | 1810014B01Rik        | 1.55  | 0.306 | 1.61 | 0.020 | 1.22  | 0.567 | 1.44  | 0.568 | 1.19  | 0.718 |
| 1451144_at   | brix domain containing 2                                       | Bxdc2                | 1.31  | 0.240 | 1.61 | 0.046 | 1.09  | 0.147 | 1.19  | 0.000 | 1.07  | 0.226 |
| 1425846_a_at | calneuron 1                                                    | Caln1                | 1.38  | 0.754 | 1.61 | 0.009 | 2.41  | 0.402 | 1.18  | 0.850 | 1.12  | 0.443 |
| 1422969_s_at | inositol hexaphosphate kinase 1                                | Ihpk1                | 1.04  | 0.526 | 1.61 | 0.012 | 1.19  | 0.774 | 1.08  | 0.160 | 1.27  | 0.159 |
| 1429389_at   | SET domain and mariner transposase fusion gene                 | Setmar               | 1.68  | 0.133 | 1.61 | 0.043 | 1.05  | 0.985 | 1.25  | 0.110 | 1.09  | 0.601 |
| 1443913_at   | Vacuolar protein sorting 33A (yeast)                           | Vps33a               | 1.82  | 0.257 | 1.61 | 0.024 | 1.64  | 0.559 | 1.73  | 0.959 | 1.05  | 0.549 |
| 1429728_at   | RIKEN cDNA 4930429M06Rik                                       | 4930429M06Rik        | 1.67  | 0.022 | 1.6  | 0.023 | 1.38  | 0.212 | 1.06  | 0.653 | 1.09  | 0.260 |
| 1434748_at   | cytoskeleton associated protein 2                              | Ckap2                | 1.18  | 0.118 | 1.6  | 0.028 | 1.21  | 0.097 | -1.02 | 0.644 | 1.29  | 0.075 |
| 1429888_a_at | heat shock protein 2                                           | Hspb2                | 1.63  | 0.512 | 1.6  | 0.048 | -1.04 | 0.721 | 1.23  | 0.299 | 1.1   | 0.668 |
| 1417922_at   | kelch repeat and BTB (POZ) domain containing 4                 | Kbtbd4               | 1.23  | 0.136 | 1.6  | 0.008 | 1.27  | 0.027 | -1    | 0.837 | 1.41  | 0.087 |
| 1417057_a_at | peptidylprolyl isomerase D (cyclophilin D) /// lysosomal-assoc | Ppid /// Lamp3 /// I | 1.1   | 0.617 | 1.6  | 0.030 | 1.12  | 0.381 | 1.24  | 0.030 | 1.19  | 0.227 |
| 1417139_at   | RIKEN cDNA 1700022L09 gene                                     | 1700022L09Rik        | 1.06  | 0.416 | 1.59 | 0.038 | 1.02  | 0.555 | 1.03  | 0.492 | 1.21  | 0.399 |
| 1430280_at   | RIKEN cDNA 1810062G17 gene                                     | 1810062G17Rik        | 2.24  | 0.257 | 1.59 | 0.027 | 2.09  | 0.217 | 2.45  | 0.014 | 2.15  | 0.982 |
| 1437780_at   | Fanconi anemia, complementation group B                        | Fancb                | 1.22  | 0.213 | 1.59 | 0.008 | 1.16  | 0.290 | 1.14  | 0.096 | 1.16  | 0.177 |
| 1422250_at   | mitogen activated protein kinase kinase kinase 2               | Map3k2               | 1.29  | 0.201 | 1.59 | 0.012 | -1.19 | 0.065 | -1.01 | 0.742 | -1.03 | 0.434 |
| 1433565_at   | PRP38 pre-mRNA processing factor 38 (yeast) domain conta       | Prpf38a              | 1.33  | 0.268 | 1.59 | 0.020 | 1.08  | 0.230 | 1.1   | 0.070 | -1.04 | 0.480 |
| 1451560_at   | proline rich 12                                                | Prr12                | 1.2   | 0.299 | 1.59 | 0.028 | 1.01  | 0.889 | 1.5   | 0.622 | 1.51  | 0.194 |
| 1428983_at   | scleraxis                                                      | Scx                  | 1.09  | 0.499 | 1.59 | 0.001 | -1.18 | 0.501 | 1.1   | 0.557 | -1.02 | 0.908 |
| 1451302_at   | RIKEN cDNA 1110012L19 gene                                     | 1110012L19Rik        | 1.24  | 0.261 | 1.58 | 0.011 | 1.24  | 0.028 | 1.19  | 0.013 | 1.2   | 0.054 |
| 1452273_at   | expressed sequence AA409316                                    | AA409316             | 1.23  | 0.209 | 1.58 | 0.035 | 1.42  | 0.014 | 1.3   | 0.012 | 1.55  | 0.033 |
| 1454814_s_at | expressed sequence AU021838                                    | AU021838             | 1.26  | 0.123 | 1.58 | 0.015 | 1.17  | 0.023 | 1.28  | 0.052 | 1.29  | 0.007 |
| 1456280_at   | claspin homolog (Xenopus laevis)                               | Clspn                | 1.25  | 0.013 | 1.58 | 0.007 | 1.11  | 0.244 | 1.08  | 0.420 | 1.16  | 0.119 |
| 1454737_at   | dual specificity phosphatase 9                                 | Dusp9                | 1.03  | 0.928 | 1.58 | 0.049 | 1.37  | 0.022 | 1.24  | 0.014 | 1.45  | 0.045 |
| 1436310_at   | gem (nuclear organelle) associated protein 5                   | Gemin5               | 1.5   | 0.337 | 1.58 | 0.050 | 1.09  | 0.696 | 1.18  | 0.086 | 1.16  | 0.282 |
| 1417541_at   | helicase, lymphoid specific                                    | Hells                | 1.05  | 0.006 | 1.58 | 0.003 | 1.17  | 0.184 | 1.06  | 0.635 | 1.1   | 0.290 |
| 1424473_at   | polymerase (RNA) II (DNA directed) polypeptide H               | Polr2h               | 1.25  | 0.115 | 1.58 | 0.000 | 1.27  | 0.005 | 1.21  | 0.041 | 1.22  | 0.054 |
| 1417972_s_at | processing of precursor 5, ribonuclease P/MRP family (S. cer   | Pop5                 | 1.1   | 0.342 | 1.58 | 0.003 | 1.17  | 0.038 | 1.23  | 0.015 | 1.38  | 0.016 |
| 1418369_at   | DNA primase, p49 subunit                                       | Prim1                | 1.28  | 0.071 | 1.58 | 0.040 | 1.22  | 0.017 | 1.13  | 0.095 | 1.07  | 0.325 |
| 1428905_at   | Ras-related GTP binding A                                      | Rraga                | 1.41  | 0.300 | 1.58 | 0.012 | 1.12  | 0.009 | 1.58  | 0.002 | 1.23  | 0.012 |
| 1450461_at   | transcription factor 7, T-cell specific                        | Tcf7                 | 1.47  | 0.221 | 1.58 | 0.034 | -1.01 | 0.720 | -1.13 | 0.600 | 1.17  | 0.666 |
| 1423951_at   | TM2 domain containing 3                                        | Tm2d3                | 1.24  | 0.355 | 1.58 | 0.014 | 1.03  | 0.782 | 1.09  | 0.273 | 1.23  | 0.059 |
| 1449354_at   | U2 small nuclear ribonucleoprotein auxiliary factor (U2AF) 1,  | U2af1-rs1            | 1.26  | 0.055 | 1.58 | 0.016 | 1.17  | 0.083 | 1.05  | 0.826 | 1.15  | 0.354 |
| 1437979_at   | Zinc finger, CCHC domain containing 2                          | Zcchc2               | -1.29 | 0.266 | 1.58 | 0.001 | -1.08 | 0.536 | 1.17  | 0.868 | 1.11  | 0.812 |
| 1416370_at   | zinc finger proliferation 1                                    | Zipro1               | 1.11  | 0.511 | 1.58 | 0.025 | 1.29  | 0.099 | 1.25  | 0.024 | 1.5   | 0.004 |
| 1453006_at   | RIKEN cDNA 2610306H15 gene                                     | 2610306H15Rik        | 1.09  | 0.348 | 1.57 | 0.040 | 1.44  | 0.036 | 1.26  | 0.000 | 1.57  | 0.006 |
| 1450323_at   | RIKEN cDNA 5730493B19 gene                                     | 5730493B19Rik        | 1.54  | 0.270 | 1.57 | 0.020 | 1.32  | 0.017 | -1.35 | 0.138 | -1.07 | 0.435 |
| 1428457_at   | RIKEN cDNA 5830472M02 gene                                     | 5830472M02Rik        | 1.29  | 0.161 | 1.57 | 0.024 | 1.18  | 0.058 | 1.21  | 0.005 | 1.24  | 0.016 |
| 1451987_at   | arrestin, beta 2                                               | Arrb2                | 1.33  | 0.887 | 1.57 | 0.021 | 1.09  | 0.349 | 1.03  | 0.539 | 1.52  | 0.236 |

|              |                                                                |                  |       |       |      |       |       |       |       |       |       |       |
|--------------|----------------------------------------------------------------|------------------|-------|-------|------|-------|-------|-------|-------|-------|-------|-------|
| 1447332_at   | expressed sequence C86896                                      | C86896           | 1.78  | 0.081 | 1.57 | 0.024 | 1.15  | 0.725 | 1.36  | 0.252 | 1.07  | 0.735 |
| 1425594_at   | laminin gamma 3                                                | Lamc3            | 1.17  | 0.913 | 1.57 | 0.037 | 1.46  | 0.882 | -1.27 | 0.347 | -1.4  | 0.265 |
| 1436281_at   | Similar to hypothetical protein FLJ38281                       | LOC245305        | 1.37  | 0.039 | 1.57 | 0.039 | 1.04  | 0.951 | 1.1   | 0.159 | -1.02 | 0.868 |
| 1417947_at   | proliferating cell nuclear antigen                             | Pcna             | 1.36  | 0.148 | 1.57 | 0.047 | 1.15  | 0.007 | 1.16  | 0.058 | 1.13  | 0.150 |
| 1434229_a_at | polymerase (DNA directed), beta                                | Polb             | 1.43  | 0.113 | 1.57 | 0.033 | -1.01 | 0.856 | -1    | 0.935 | 1.11  | 0.198 |
| 1438421_at   | poliovirus receptor-related 1                                  | Pvr1f            | 1.39  | 0.195 | 1.57 | 0.028 | 1.14  | 0.922 | -1.14 | 0.174 | 1.24  | 0.418 |
| 1440986_at   | RNA polymerase II associated protein 1                         | Rpap1            | 1.86  | 0.163 | 1.57 | 0.025 | 2.5   | 0.587 | 1.35  | 0.042 | 1.61  | 0.522 |
| 1455335_at   | X-ray repair complementing defective repair in Chinese hamr    | Xrcc2            | 1.14  | 0.145 | 1.57 | 0.000 | 1.46  | 0.141 | 1.01  | 0.965 | 1.2   | 0.261 |
| 1443985_at   | zinc finger protein 719                                        | Zfp719           | 1.55  | 0.079 | 1.57 | 0.003 | -1.12 | 0.331 | 1.31  | 0.269 | -1.04 | 0.435 |
| 1453183_at   | RIKEN cDNA 1110034A24 gene                                     | 1110034A24Rik    | 1.28  | 0.043 | 1.56 | 0.001 | 1.21  | 0.066 | 1.08  | 0.496 | 1.18  | 0.193 |
| 1431903_at   | RIKEN cDNA 4930524C18 gene                                     | 4930524C18Rik    | 1.37  | 0.802 | 1.56 | 0.035 | -1.74 | 0.189 | 1.37  | 0.481 | 1.24  | 0.540 |
| 1422168_a_at | brain derived neurotrophic factor                              | Bdnf             | 1.23  | 0.273 | 1.56 | 0.011 | 1.1   | 0.089 | 1.18  | 0.033 | 1.3   | 0.043 |
| 1419547_at   | fumarylacetoacetate hydrolase domain containing 1              | Fahd1            | 1.39  | 0.200 | 1.56 | 0.041 | 1.1   | 0.372 | 1.11  | 0.054 | -1.05 | 0.466 |
| 1421731_a_at | flap structure specific endonuclease 1                         | Fen1             | 1.18  | 0.546 | 1.56 | 0.001 | 1.28  | 0.003 | 1.25  | 0.030 | 1.27  | 0.001 |
| 1457230_at   | glucosamine-6-phosphate deaminase 2                            | Gnpda2           | 1.58  | 0.344 | 1.56 | 0.047 | 1.32  | 0.126 | 1.25  | 0.318 | 1.19  | 0.191 |
| 1452906_at   | GTL2, imprinted maternally expressed untranslated mRNA         | Gtl2             | 2.02  | 0.351 | 1.56 | 0.029 | 1.01  | 0.927 | 1.15  | 0.775 | -1.17 | 0.250 |
| 1425192_at   | kelch-like 25 (Drosophila)                                     | Klhl25           | 1.14  | 0.627 | 1.56 | 0.031 | 1.12  | 0.113 | 1.15  | 0.212 | 1.13  | 0.657 |
| 1450836_at   | neurogenin 1                                                   | Neurog1          | 2.62  | 0.053 | 1.56 | 0.046 | -1.25 | 0.336 | 1.79  | 0.610 | -5.02 | 0.028 |
| 1449002_at   | pleckstrin homology-like domain, family A, member 3            | Phlda3           | 1.21  | 0.271 | 1.56 | 0.024 | 1.07  | 0.054 | 1.13  | 0.007 | 1.17  | 0.050 |
| 1434453_at   | polymerase (RNA) III (DNA directed) polypeptide A              | Poir3a           | 1.25  | 0.366 | 1.56 | 0.018 | 1.3   | 0.100 | 1.04  | 0.578 | 1.14  | 0.215 |
| 1451105_at   | vasohibin 2                                                    | Vash2            | 1.11  | 0.368 | 1.56 | 0.006 | 1.11  | 0.359 | 1.19  | 0.049 | 1.26  | 0.360 |
| 1428127_at   | RIKEN cDNA 4921506J03 gene                                     | 4921506J03Rik    | 1.14  | 0.404 | 1.55 | 0.026 | 1.06  | 0.914 | 1.31  | 0.003 | 1.24  | 0.145 |
| 1454405_at   | RIKEN cDNA 4930453J04 gene                                     | 4930453J04Rik    | 1.19  | 0.758 | 1.55 | 0.031 | 1.27  | 0.574 | -1.45 | 0.207 | 1.27  | 0.373 |
| 1424012_at   | RIKEN cDNA 4930506L13 gene                                     | 4930506L13Rik    | 1.13  | 0.252 | 1.55 | 0.003 | 1.48  | 0.220 | 1.07  | 0.619 | 1.21  | 0.173 |
| 1448199_at   | ankyrin repeat domain 10                                       | Ankrd10          | -1.06 | 0.126 | 1.55 | 0.005 | 1.45  | 0.019 | 1.24  | 0.040 | 1.39  | 0.049 |
| 1436543_at   | cDNA sequence BC034507                                         | BC034507         | 1.34  | 0.145 | 1.55 | 0.009 | 1.06  | 0.548 | 1.41  | 0.010 | 1.22  | 0.254 |
| 1422033_a_at | ciliary neurotrophic factor /// zinc finger protein 91         | Cntf /// Zfp91   | 1.23  | 0.011 | 1.55 | 0.048 | 1.2   | 0.202 | 1.21  | 0.056 | 1.26  | 0.103 |
| 1457539_at   | DNA segment, Chr 10, ERATO Doi 709, expressed                  | D10Ertd709e      | 1.79  | 0.143 | 1.55 | 0.008 | -1.01 | 0.695 | 1.17  | 0.641 | 1.07  | 0.741 |
| 1452700_s_at | kelch repeat and BTB (POZ) domain containing 7                 | Kbtbd7           | -1.03 | 0.673 | 1.55 | 0.008 | 1.52  | 0.005 | 1.29  | 0.083 | 1.58  | 0.025 |
| 1428255_at   | Luc7 homolog (S. cerevisiae)-like                              | Luc7l            | 1.08  | 0.603 | 1.55 | 0.017 | 1.17  | 0.119 | 1.29  | 0.002 | 1.15  | 0.023 |
| 1419399_at   | microsomal triglyceride transfer protein                       | Mttp             | 1.61  | 0.139 | 1.55 | 0.010 | 2.29  | 0.111 | 1.27  | 0.617 | 1.21  | 0.424 |
| 1442148_at   | PC4 and SFRS1 interacting protein 1                            | Psip1            | 1.42  | 0.395 | 1.55 | 0.022 | 1.42  | 0.434 | -1.04 | 0.547 | 1.26  | 0.050 |
| 1451106_at   | RNA binding motif protein 21                                   | Rbm21            | 1.18  | 0.165 | 1.55 | 0.028 | 1.17  | 0.242 | 1.35  | 0.014 | 1.44  | 0.023 |
| 1450417_a_at | ribosomal protein S20 /// similar to 40S ribosomal protein S2c | Rps20 /// LOC245 | 1.35  | 0.045 | 1.55 | 0.049 | 1.9   | 0.449 | 1.25  | 0.412 | 1.59  | 0.016 |
| 1450599_at   | vomeronal 1 receptor, B3                                       | V1rb3            | 1.59  | 0.943 | 1.55 | 0.018 | 2.11  | 0.201 | -1.51 | 0.126 | 1.22  | 0.700 |
| 1422070_at   | alcohol dehydrogenase 4 (class II), pi polypeptide             | Adh4             | 2.28  | 0.238 | 1.54 | 0.017 | 1.02  | 2.349 | -1.16 | 0.427 | 2.29  | 0.428 |
| 1459952_at   | Ankyrin repeat domain 17                                       | Ankrd17          | 1.55  | 0.166 | 1.54 | 0.011 | -1.17 | 0.246 | 1.04  | 0.523 | -1.29 | 0.157 |
| 1439063_at   | additional sex combs like 2 (Drosophila)                       | Asxl2            | 1.02  | 0.903 | 1.54 | 0.026 | 1.15  | 0.362 | 1.2   | 0.033 | -1.03 | 0.558 |
| 1425488_at   | DNA segment, Chr 11, ERATO Doi 730, expressed                  | D11Ertd730e      | 1.32  | 0.284 | 1.54 | 0.036 | -1.11 | 0.356 | 1.15  | 0.040 | 1.08  | 0.752 |
| 1432207_a_at | target of EGR1, member 1 (nuclear)                             | Toe1             | 1.38  | 0.554 | 1.54 | 0.037 | 1.01  | 0.992 | 1.1   | 0.826 | 1.09  | 0.424 |
| 1434858_x_at | zinc finger protein 511                                        | Zfp511           | 1.48  | 0.213 | 1.54 | 0.041 | 1.08  | 0.494 | 1.37  | 0.539 | 1.19  | 0.265 |
| 1428832_at   | RIKEN cDNA 1600002H07 gene                                     | 1600002H07Rik    | 1.07  | 0.550 | 1.53 | 0.024 | 1.37  | 0.141 | 1.18  | 0.330 | 1.44  | 0.039 |
| 1454480_at   | RIKEN cDNA 4933439N06 gene                                     | 4933439N06Rik    | -1.31 | 0.275 | 1.53 | 0.039 | 1.28  | 0.581 | -1.2  | 0.434 | 2.36  | 0.461 |
| 1448055_at   | fibronectin type III domain containing 7                       | Fndc7            | 1.99  | 0.327 | 1.53 | 0.027 | -1.1  | 0.397 | 1.24  | 0.131 | 2.5   | 0.284 |
| 1448417_at   | ninjurin 1                                                     | Ninj1            | 1.36  | 0.314 | 1.53 | 0.044 | 1.25  | 0.180 | 1.14  | 0.001 | 1.82  | 0.089 |
| 1422913_at   | protamine 3                                                    | Prm3             | -1.01 | 0.903 | 1.53 | 0.040 | -2.66 | 0.018 | 1.68  | 0.333 | -1.15 | 0.230 |
| 1436573_at   | secernin 3                                                     | Scrn3            | 1.04  | 0.771 | 1.53 | 0.041 | 1.14  | 0.187 | 1.19  | 0.264 | 1.25  | 0.237 |
| 1455297_at   | spindlin family, member 2                                      | Spin2            | 1.39  | 0.415 | 1.53 | 0.048 | 1.33  | 0.018 | 1.11  | 0.658 | 1.35  | 0.064 |
| 1443792_at   | testis specific gene A14                                       | Tsga14           | 1.43  | 0.354 | 1.53 | 0.009 | 1.02  | 0.925 | 1.07  | 1.000 | 1.25  | 0.404 |
| 1424892_at   | zinc finger protein 95                                         | Zfp95            | 1.17  | 0.399 | 1.53 | 0.031 | 1.25  | 0.032 | 1.2   | 0.031 | 1.47  | 0.023 |
| 1453775_at   | RIKEN cDNA 4921505C17 gene                                     | 4921505C17Rik    | 1.47  | 0.111 | 1.52 | 0.010 | -1.12 | 0.183 | -1.02 | 0.869 | 1.11  | 0.427 |
| 1429921_at   | RIKEN cDNA 9530068E07 gene                                     | 9530068E07Rik    | 2.05  | 0.080 | 1.52 | 0.003 | 1.1   | 0.697 | -1.08 | 0.565 | 1.55  | 0.147 |
| 1424126_at   | aminolevulinic acid synthase 1                                 | Alas1            | 1.24  | 0.383 | 1.52 | 0.016 | 1.12  | 0.075 | 1.1   | 0.183 | 1.28  | 0.058 |
| 1458873_at   | asp (abnormal spindle)-like, microcephaly associated (Droso)   | Aspm             | 1.35  | 0.019 | 1.52 | 0.006 | 1.03  | 0.789 | 1.09  | 0.061 | -1.01 | 0.934 |
| 1437909_at   | RIKEN cDNA D030022P06 gene                                     | D030022P06Rik    | 1.05  | 0.544 | 1.52 | 0.032 | 1.03  | 0.826 | 1.14  | 0.260 | 1.09  | 0.802 |
| 1436006_at   | eukaryotic translation initiation factor 2 alpha kinase 1      | Eif2ak1          | 1.42  | 0.124 | 1.52 | 0.022 | 1.03  | 0.867 | 1     | 0.955 | 1.16  | 0.501 |
| 1425937_s_at | hexamethylene bis-acetamide inducible 1                        | Hexim1           | 1.05  | 0.729 | 1.52 | 0.009 | 1.39  | 0.015 | 1.49  | 0.002 | 1.41  | 0.015 |
| 1457241_at   | Leucine rich repeat containing 48                              | Lrrc48           | 1.77  | 0.316 | 1.52 | 0.049 | 1.25  | 0.302 | 1.66  | 0.512 | -1.6  | 0.149 |

|              |                                                                  |               |       |       |      |       |       |       |       |       |       |       |
|--------------|------------------------------------------------------------------|---------------|-------|-------|------|-------|-------|-------|-------|-------|-------|-------|
| 1449017_at   | nuclear transport factor 2                                       | Nutf2         | 1.22  | 0.263 | 1.52 | 0.011 | 1.16  | 0.093 | 1.23  | 0.004 | 1.24  | 0.002 |
| 1423856_at   | popeye domain containing 3                                       | Popdc3        | 1.23  | 0.956 | 1.52 | 0.046 | -1.18 | 0.394 | 1.29  | 0.226 | -1.21 | 0.426 |
| 1433947_at   | RAB37, member of RAS oncogene family                             | Rab37         | -1.37 | 0.270 | 1.52 | 0.023 | 1.39  | 0.883 | 1.5   | 0.139 | 1.24  | 0.925 |
| 1439548_at   | RAP2B, member of RAS oncogene family                             | Rap2b         | 1.04  | 0.953 | 1.52 | 0.031 | 1.59  | 0.011 | 1.4   | 0.218 | 1.3   | 0.078 |
| 1426612_at   | timeless interacting protein                                     | Tipin         | 1.3   | 0.029 | 1.52 | 0.010 | 1.06  | 0.072 | 1.11  | 0.072 | 1.07  | 0.099 |
| 1451193_x_at | tetratricopeptide repeat domain 4                                | Ttc4          | 1.49  | 0.135 | 1.52 | 0.035 | 1.22  | 0.144 | 1.1   | 0.218 | 1.08  | 0.336 |
| 1423357_at   | RIKEN cDNA 2610209A20 gene                                       | 2610209A20Rik | 1.45  | 0.066 | 1.51 | 0.036 | 1.15  | 0.034 | 1.16  | 0.192 | 1.24  | 0.113 |
| 1429137_at   | RIKEN cDNA 2810422O20 gene                                       | 2810422O20Rik | 1.51  | 0.065 | 1.51 | 0.015 | 1.44  | 0.081 | 1.51  | 0.098 | -1.07 | 0.439 |
| 1451688_s_at | calcium activated nucleotidase 1                                 | Cant1         | 1.74  | 0.142 | 1.51 | 0.031 | -1.06 | 0.895 | 1.36  | 0.311 | 1.01  | 0.772 |
| 1448455_at   | ceroid-lipofuscinosis, neuronal 8                                | Cln8          | 1.13  | 0.409 | 1.51 | 0.026 | 1.09  | 0.500 | 1.17  | 0.021 | 1.17  | 0.072 |
| 1451058_at   | malignant T cell amplified sequence 2                            | Mcts2         | 1.14  | 0.013 | 1.51 | 0.018 | 1.09  | 0.736 | 1.15  | 0.285 | 1.18  | 0.201 |
| 1450400_at   | nuclear receptor coactivator 6 interacting protein               | Ncoa6ip       | 1.16  | 0.134 | 1.51 | 0.035 | 1.07  | 0.636 | 1.19  | 0.002 | 1.15  | 0.116 |
| 1417037_at   | origin recognition complex, subunit 6-like (S. cerevisiae)       | Orc6l         | 1.21  | 0.006 | 1.51 | 0.035 | 1.16  | 0.047 | 1.18  | 0.018 | 1.2   | 0.052 |
| 1422994_at   | phosphatidylinositol-3-phosphate/phosphatidylinositol 5-kinase   | Pip5k3        | 1.19  | 0.327 | 1.51 | 0.010 | -1.24 | 0.160 | -1.04 | 0.628 | 1.12  | 0.745 |
| 1448369_at   | polymerase (DNA directed), alpha 2                               | Pola2         | 1.51  | 0.175 | 1.51 | 0.024 | 1.47  | 0.007 | 1.39  | 0.160 | 1.43  | 0.030 |
| 1450862_at   | RAD54 like (S. cerevisiae)                                       | Rad54l        | 1.49  | 0.138 | 1.51 | 0.036 | 1.04  | 0.678 | 1.28  | 0.002 | -1.09 | 0.270 |
| 1441085_at   | RAR-related orphan receptor alpha                                | Rora          | -1    | 0.563 | 1.51 | 0.005 | 1.18  | 0.782 | -1.13 | 0.163 | 2.14  | 0.405 |
| 1417548_at   | squamous cell carcinoma antigen recognized by T-cells 3          | Sart3         | 1.12  | 0.692 | 1.51 | 0.041 | 1.04  | 0.458 | 1.45  | 0.507 | 1.47  | 0.300 |
| 1423809_at   | transcription factor 19                                          | Tcf19         | 1.14  | 0.094 | 1.51 | 0.034 | 1.33  | 0.254 | 1.15  | 0.037 | 1.34  | 0.031 |
| 1428592_s_at | ubiquitin specific peptidase 38                                  | Usp38         | 1.07  | 0.611 | 1.51 | 0.020 | 1.1   | 0.366 | 1.06  | 0.498 | 1.09  | 0.052 |
| 1427449_a_at | ADP-ribosylhydrolase like 2                                      | Adprhl2       | 1.1   | 0.279 | 1.5  | 0.000 | 1.24  | 0.081 | 1.29  | 0.087 | 1.19  | 0.070 |
| 1450983_at   | A kinase (PRKA) anchor protein 8                                 | Akap8         | 1.08  | 0.413 | 1.5  | 0.002 | 1.23  | 0.084 | 1.2   | 0.066 | 1.09  | 0.266 |
| 1441067_at   | Expressed sequence AL033314                                      | AL033314      | 1.19  | 0.272 | 1.5  | 0.045 | -1.04 | 0.703 | 1.05  | 0.365 | 3.02  | 0.125 |
| 1421635_at   | cyclin M4                                                        | Cnm4          | 1.21  | 0.096 | 1.5  | 0.042 | 2.02  | 0.315 | 1.04  | 0.792 | 1.68  | 0.398 |
| 1454963_at   | RIKEN cDNA E430028B21 gene                                       | E430028B21Rik | 1.17  | 0.113 | 1.5  | 0.005 | 1.2   | 0.060 | 1.16  | 0.012 | 1.29  | 0.027 |
| 1448991_a_at | interneixin neuronal intermediate filament protein, alpha        | Ina           | 1.4   | 0.319 | 1.5  | 0.018 | 1.1   | 0.844 | -1.2  | 0.140 | 1.12  | 0.518 |
| 1449092_at   | protein phosphatase 1D magnesium-dependent, delta isoform        | Ppm1d         | -1.03 | 0.558 | 1.5  | 0.007 | 1.16  | 0.026 | 1.23  | 0.015 | 1.29  | 0.024 |
| 1452789_at   | stannin                                                          | Snn           | 1.05  | 0.805 | 1.5  | 0.010 | 1.2   | 0.229 | 1.28  | 0.002 | 1.42  | 0.012 |
| 1460164_at   | spindlin                                                         | Spin          | 1.13  | 0.837 | 1.5  | 0.029 | 1.1   | 0.582 | 1.29  | 0.306 | 1.25  | 0.234 |
| 1419630_a_at | tripartite motif protein 11                                      | Trim11        | 1.07  | 0.481 | 1.5  | 0.031 | 1.15  | 0.116 | 1.19  | 0.105 | 1.04  | 0.785 |
| 1424929_a_at | tripartite motif protein 26                                      | Trim26        | 1.12  | 0.472 | 1.5  | 0.027 | 1.2   | 0.079 | 1.27  | 0.005 | 1.12  | 0.134 |
| 1433899_x_at | TSC22 domain family, member 1                                    | Tsc22d1       | 1.37  | 0.037 | 1.5  | 0.029 | 1.38  | 0.152 | 1.27  | 0.074 | 1.27  | 0.203 |
| 1417031_at   | RIKEN cDNA 2310028N02 gene                                       | 2310028N02Rik | 1.48  | 0.220 | 1.49 | 0.027 | 1.08  | 0.500 | 1.15  | 0.401 | 1.08  | 0.641 |
| 1427209_at   | bromodomain adjacent to zinc finger domain, 2A                   | Baz2a         | 1.3   | 0.200 | 1.49 | 0.044 | 1.08  | 0.602 | 1.12  | 0.379 | 1.15  | 0.508 |
| 1435969_at   | BTB (POZ) domain containing 12                                   | Btb12         | 1.24  | 0.072 | 1.49 | 0.024 | 1.08  | 0.908 | 1.11  | 0.349 | 1.1   | 0.873 |
| 1456441_at   | coiled-coil domain containing 87                                 | Ccdc87        | 1.4   | 0.066 | 1.49 | 0.047 | 1.32  | 0.196 | 2.71  | 0.763 | -1.11 | 0.409 |
| 1416332_at   | cold inducible RNA binding protein                               | Cirbp         | 1.53  | 0.326 | 1.49 | 0.033 | 1.14  | 0.092 | 1     | 0.980 | 1.23  | 0.118 |
| 1421953_at   | v-crk sarcoma virus CT10 oncogene homolog (avian)-like           | Crkl          | 1.32  | 0.116 | 1.49 | 0.028 | 1.06  | 0.687 | 1.26  | 0.496 | 1.12  | 0.825 |
| 1438765_at   | DEAH (Asp-Glu-Ala-His) box polypeptide 33                        | Dhx33         | 1.54  | 0.187 | 1.49 | 0.016 | -1.04 | 0.504 | 1.22  | 0.136 | -1.08 | 0.398 |
| 1452797_at   | FAST kinase domains 3                                            | Fastkd3       | 1.14  | 0.345 | 1.49 | 0.007 | 1.21  | 0.005 | 1.2   | 0.009 | 1.02  | 0.430 |
| 1452316_at   | integrator complex subunit 12                                    | Ints12        | 1.15  | 0.111 | 1.49 | 0.002 | 1.25  | 0.012 | 1.18  | 0.058 | 1.28  | 0.111 |
| 1427999_at   | small nuclear RNA activating complex, polypeptide 5              | Snapc5        | 1.08  | 0.683 | 1.49 | 0.042 | 1.2   | 0.965 | 1.94  | 0.100 | -1.01 | 0.682 |
| 1424967_x_at | troponin T2, cardiac                                             | Tnnt2         | 1.31  | 0.137 | 1.49 | 0.047 | 1.06  | 0.671 | 1.24  | 0.049 | -1.18 | 0.299 |
| 1449231_at   | zinc finger protein 296                                          | Zfp296        | -1.01 | 0.813 | 1.49 | 0.041 | 1.21  | 0.105 | 1.47  | 0.019 | 1.81  | 0.019 |
| 1429671_at   | RIKEN cDNA 2410018M08 gene                                       | 2410018M08Rik | 1.01  | 0.990 | 1.48 | 0.044 | 1.38  | 0.434 | 1.33  | 0.065 | 1.26  | 0.175 |
| 1456181_at   | RIKEN cDNA 9530020G05 gene                                       | 9530020G05Rik | -1.11 | 0.280 | 1.48 | 0.020 | 1.16  | 0.791 | 1.28  | 0.148 | 1.39  | 0.042 |
| 1417734_at   | A kinase (PRKA) anchor protein 8-like                            | Akap8l        | 1.11  | 0.783 | 1.48 | 0.034 | -1.03 | 0.487 | 1.31  | 0.044 | 1.11  | 0.365 |
| 1452902_at   | dehydrogenase/reductase (SDR family) member 13                   | Dhrs13        | 1.04  | 0.700 | 1.48 | 0.008 | 1.21  | 0.043 | 1.31  | 0.137 | 1.26  | 0.201 |
| 1449859_at   | golgi transport 1 homolog B (S. cerevisiae)                      | Golt1b        | 1.38  | 0.515 | 1.48 | 0.011 | -1.2  | 0.917 | -1    | 0.942 | 1.2   | 0.386 |
| 1416448_at   | inosine triphosphatase (nucleoside triphosphate pyrophosphatase) | Itpa          | 1.29  | 0.209 | 1.48 | 0.014 | 1.2   | 0.100 | 1.11  | 0.340 | 1.09  | 0.347 |
| 1417844_at   | mediator of RNA polymerase II transcription, subunit 4 homolog   | Med4          | 1.26  | 0.249 | 1.48 | 0.047 | 1.15  | 0.174 | 1.16  | 0.013 | 1.13  | 0.116 |
| 1424081_at   | polycomb group ring finger 6                                     | Pcgf6         | 1.21  | 0.147 | 1.48 | 0.009 | 1.16  | 0.049 | 1.2   | 0.002 | 1.26  | 0.048 |
| 1450778_a_at | RNA U, small nuclear RNA export adaptor                          | Rnuxa         | 1.1   | 0.042 | 1.48 | 0.014 | 1.18  | 0.027 | 1.26  | 0.014 | 1.15  | 0.086 |
| 1427134_at   | splicing factor, arginine/serine-rich 12                         | Srsf12        | 1.06  | 0.652 | 1.48 | 0.026 | 1.15  | 0.256 | 1.19  | 0.015 | 1.08  | 0.890 |
| 1425682_a_at | Tp53rk binding protein                                           | Tprkb         | 1.13  | 0.201 | 1.48 | 0.037 | 1.1   | 0.458 | 1.03  | 0.477 | 1.12  | 0.178 |
| 1417340_at   | thioredoxin-like 2                                               | Txn12         | 1.22  | 0.513 | 1.48 | 0.024 | 1.06  | 0.667 | 1.03  | 0.742 | 1.03  | 0.513 |
| 1434689_at   | zinc finger protein 637                                          | Zfp637        | 1.36  | 0.042 | 1.48 | 0.006 | 1.26  | 0.027 | 1.11  | 0.310 | 1.31  | 0.020 |
| 1421031_a_at | RIKEN cDNA 2310016C08 gene                                       | 2310016C08Rik | 1.12  | 0.597 | 1.47 | 0.003 | 1.29  | 0.067 | 1.31  | 0.002 | 1.21  | 0.066 |

|              |                                                                  |                   |       |       |      |       |       |        |       |       |       |       |
|--------------|------------------------------------------------------------------|-------------------|-------|-------|------|-------|-------|--------|-------|-------|-------|-------|
| 1429619_a_at | RIKEN cDNA 8430406107 gene                                       | 8430406107Rik     | 1.28  | 0.868 | 1.47 | 0.029 | 1.28  | 0.217  | 1.37  | 0.119 | 1.1   | 0.449 |
| 1416569_at   | actin-like 6A                                                    | Actl6a            | 1.12  | 0.840 | 1.47 | 0.011 | 1.15  | 0.362  | -1.02 | 0.784 | 1.07  | 0.387 |
| 1418542_s_at | centromere protein O                                             | Centpo            | 1.56  | 0.188 | 1.47 | 0.002 | 1.05  | 0.756  | 1.26  | 0.026 | 1.14  | 0.779 |
| 1415713_a_at | DEAD (Asp-Glu-Ala-Asp) box polypeptide 24                        | Ddx24             | 1.19  | 0.333 | 1.47 | 0.035 | 1.1   | 0.027  | 1.14  | 0.004 | 1.14  | 0.016 |
| 1418409_at   | jerky                                                            | Jrk               | 1.21  | 0.407 | 1.47 | 0.035 | 1.17  | 0.500  | 1.26  | 0.126 | 1.14  | 0.543 |
| 1422087_at   | v-myc myelocytomatosis viral oncogene homolog 1, lung carr       | Mycl1             | 1.57  | 0.190 | 1.47 | 0.047 | 1.33  | 0.890  | 1.02  | 0.939 | -1.25 | 0.633 |
| 1422471_at   | peroxisomal biogenesis factor 13                                 | Pex13             | 1.07  | 0.714 | 1.47 | 0.013 | 1.17  | 0.012  | 1.24  | 0.000 | 1.21  | 0.008 |
| 1423234_at   | proteasome (prosome, macropain) 26S subunit, non-ATPase          | Psmd5             | 1.17  | 0.207 | 1.47 | 0.037 | 1.16  | 0.000  | 1.11  | 0.024 | 1.12  | 0.045 |
| 1441598_at   | transmembrane protein with EGF-like and two follistatin-like c   | Tmeff2            | 1.11  | 0.327 | 1.47 | 0.003 | 1.02  | 0.946  | -1.3  | 0.182 | -1.29 | 0.108 |
| 1422924_at   | tumor necrosis factor (ligand) superfamily, member 9             | Tnfsf9            | -1.03 | 0.728 | 1.47 | 0.012 | 1.49  | 0.081  | 1.45  | 0.054 | 1.33  | 0.333 |
| 1430134_a_at | tyrosyl-tRNA synthetase 2 (mitochondrial)                        | Yars2             | 1.26  | 0.195 | 1.47 | 0.011 | 1.11  | 0.412  | 1.05  | 0.589 | 1.22  | 0.020 |
| 1425030_at   | zinc finger protein 622                                          | Zfp622            | 1.1   | 0.905 | 1.47 | 0.015 | 1.15  | 0.278  | 1.14  | 0.031 | 1.08  | 0.350 |
| 1433936_at   | RIKEN cDNA 0610010E21 gene                                       | 0610010E21Rik     | 1.15  | 0.022 | 1.46 | 0.010 | 1.19  | 0.133  | 1.19  | 0.008 | 1.25  | 0.019 |
| 1434207_at   | RIKEN cDNA 2900057K09 gene                                       | 2900057K09Rik     | -1.06 | 0.522 | 1.46 | 0.027 | 1.25  | 0.081  | 1.02  | 0.968 | 1.11  | 0.153 |
| 1435024_at   | RIKEN cDNA 4931428F04 gene                                       | 4931428F04Rik     | -1.16 | 0.206 | 1.46 | 0.044 | 1.05  | 0.801  | 1.57  | 0.937 | 1.62  | 0.064 |
| 1439905_at   | RIKEN cDNA A330062J17 gene                                       | A330062J17Rik     | 1.1   | 0.624 | 1.46 | 0.008 | -1.04 | 0.610  | 1.6   | 0.331 | 1.12  | 0.731 |
| 1455916_at   | expressed sequence AI931714                                      | AI931714          | 1.18  | 0.341 | 1.46 | 0.032 | 1.17  | 0.016  | 1.1   | 0.027 | -1.02 | 0.537 |
| 1449019_at   | A kinase (PRKA) anchor protein 1                                 | Akap1             | 1.11  | 0.231 | 1.46 | 0.005 | 1.23  | 0.027  | 1.15  | 0.044 | 1.16  | 0.135 |
| 1417692_at   | developmentally regulated GTP binding protein 2                  | Drp2              | 1.33  | 0.376 | 1.46 | 0.004 | -1.02 | 0.936  | 1.06  | 0.478 | -1.06 | 0.373 |
| 1424007_at   | growth differentiation factor 10                                 | Gdf10             | 1.38  | 0.727 | 1.46 | 0.048 | 1.35  | 0.433  | -2.22 | 0.010 | 1.78  | 0.673 |
| 1421207_at   | leukemia inhibitory factor                                       | Lif               | 1.12  | 0.587 | 1.46 | 0.015 | 1.23  | 0.112  | -1.12 | 0.215 | 1.13  | 0.566 |
| 1437226_x_at | MARCKS-like 1                                                    | Marcksl1          | 1.07  | 0.012 | 1.46 | 0.000 | 1.24  | 0.000  | 1.22  | 0.019 | 1.28  | 0.076 |
| 1424372_at   | mitochondrial ribosomal protein L32                              | Mrpl32            | 1.17  | 0.156 | 1.46 | 0.034 | 1.21  | 0.146  | 1.24  | 0.053 | 1.23  | 0.021 |
| 1426447_at   | nucleoporin 35                                                   | Nup35             | 1.29  | 0.066 | 1.46 | 0.014 | 1.02  | 0.947  | 1.08  | 0.242 | 1.08  | 0.303 |
| 1448419_at   | processing of precursor 4, ribonuclease P/MRP family, (S. ce     | Pop4              | 1.27  | 0.162 | 1.46 | 0.049 | 1.03  | 0.068  | 1.14  | 0.007 | 1.08  | 0.297 |
| 1449295_at   | SAP30 binding protein                                            | Sap30bp           | 1.29  | 0.313 | 1.46 | 0.030 | 1     | 0.840  | 1.07  | 0.574 | 1.15  | 0.012 |
| 1420935_a_at | serine/arginine repetitive matrix 1                              | Srrm1             | 1.09  | 0.670 | 1.46 | 0.023 | -1.25 | 0.176  | 1.03  | 0.941 | 1.64  | 0.037 |
| 1428052_a_at | zinc finger, MYM domain containing 1                             | Zmym1             | 1.07  | 0.392 | 1.46 | 0.022 | 1.15  | 0.046  | 1.16  | 0.008 | 1.17  | 0.232 |
| 1432668_at   | RIKEN cDNA 2210411G17 gene                                       | 2210411G17Rik     | 2.89  | 0.346 | 1.45 | 0.023 | -1.35 | 0.257  | 1.12  | 0.862 | -1.11 | 0.409 |
| 1455338_at   | alpha 1,4-galactosyltransferase                                  | A4galt            | 1.05  | 0.820 | 1.45 | 0.017 | 1.51  | 0.302  | 1.26  | 0.219 | -1.01 | 0.815 |
| 1443692_at   | cDNA sequence BC057022                                           | BC057022          | 1.56  | 0.356 | 1.45 | 0.047 | -1.21 | 0.169  | -1.03 | 0.771 | -1.67 | 0.127 |
| 1417207_at   | dishevelled 2, dsh homolog (Drosophila)                          | Dvl2              | 1.23  | 0.139 | 1.45 | 0.045 | 1.46  | 0.060  | 1.11  | 0.290 | 1.25  | 0.112 |
| 1425857_at   | F-box and WD-40 domain protein 9                                 | Fbxw9             | 1.18  | 0.356 | 1.45 | 0.024 | 1.05  | 0.913  | 1.17  | 0.738 | 1.44  | 0.058 |
| 1450980_at   | GTP binding protein 3                                            | Gtppb3            | 1.19  | 0.142 | 1.45 | 0.041 | 1.19  | 0.221  | 1.16  | 0.192 | 1.18  | 0.318 |
| 1447396_at   | Hypothetical protein LOC545253                                   | LOC545253         | 1.22  | 0.795 | 1.45 | 0.019 | -1.35 | 0.121  | -1    | 0.689 | 1.3   | 0.790 |
| 1426652_at   | minichromosome maintenance deficient 3 (S. cerevisiae) /// s     | Mcm3 /// LOC6711  | 1.25  | 0.158 | 1.45 | 0.010 | 1.18  | 0.086  | 1.15  | 0.175 | 1.12  | 0.418 |
| 1449981_a_at | N-acetyltransferase 2 (arylamine N-acetyltransferase)            | Nat2              | 1.31  | 0.202 | 1.45 | 0.043 | 1.1   | 0.282  | 1.03  | 0.629 | 1.02  | 0.850 |
| 1452062_at   | phosphoribosyl pyrophosphate synthetase-associated protein       | Prpsap2           | 1.04  | 0.966 | 1.45 | 0.043 | 1.06  | 0.724  | 1.23  | 0.032 | -1.1  | 0.203 |
| 1416400_at   | pyrroline-5-carboxylate reductase-like                           | Pycrl             | 1.14  | 0.225 | 1.45 | 0.008 | 1.47  | 0.015  | 1.22  | 0.062 | 1.4   | 0.071 |
| 1451189_at   | zinc finger, SWIM domain containing 1                            | Zswim1            | 1.12  | 0.522 | 1.45 | 0.012 | 1.12  | 0.044  | 1.35  | 0.015 | 1.41  | 0.045 |
| 1435755_at   | RIKEN cDNA 1110001A16 gene                                       | 1110001A16Rik     | 1.34  | 0.064 | 1.44 | 0.009 | 1.16  | 0.146  | 1.14  | 0.051 | 1.24  | 0.237 |
| 1456023_at   | RIKEN cDNA 2210010B09 gene                                       | 2210010B09Rik     | -1.13 | 0.226 | 1.44 | 0.011 | 1.34  | -0.106 | 1.37  | 0.190 | 1.17  | 0.434 |
| 1439020_at   | expressed sequence AW146020                                      | AW146020          | 1.28  | 0.039 | 1.44 | 0.042 | 1.01  | 0.832  | -1.03 | 0.657 | 1.13  | 0.057 |
| 1438370_x_at | downstream of Stk11                                              | Dos               | 1     | 0.958 | 1.44 | 0.010 | 1.41  | 0.022  | 1.12  | 0.078 | 1.64  | 0.070 |
| 1419267_at   | nuclear transcription factor-Y beta                              | Nfyb              | 1.12  | 0.484 | 1.44 | 0.011 | 1.17  | 0.094  | 1.14  | 0.341 | 1.19  | 0.198 |
| 1448802_at   | nuclear fragile X mental retardation protein interacting protein | Nufip1            | 1.11  | 0.096 | 1.44 | 0.009 | 1.04  | 0.731  | 1.1   | 0.250 | 1.11  | 0.113 |
| 1416530_a_at | purine-nucleoside phosphorylase                                  | Pnp               | 1.1   | 0.233 | 1.44 | 0.035 | 1.21  | 0.003  | 1.17  | 0.006 | 1.26  | 0.058 |
| 1426637_a_at | sine oculis-related homeobox 3 homolog (Drosophila)              | Six3              | 1.2   | 0.203 | 1.44 | 0.013 | 1.03  | 0.995  | -1.25 | 0.031 | 1.29  | 0.331 |
| 1460667_at   | cDNA sequence U90926                                             | U90926            | 1.14  | 0.686 | 1.44 | 0.018 | 1.42  | 0.029  | -1    | 0.945 | 1.06  | 0.874 |
| 1460357_at   | YTH domain family 2                                              | Ythdf2            | 1.18  | 0.074 | 1.44 | 0.010 | 1.1   | 0.430  | 1.09  | 0.169 | 1.15  | 0.033 |
| 1426654_at   | zinc finger, C3HC type 1                                         | Zc3hc1            | 1.23  | 0.632 | 1.44 | 0.029 | 1.07  | 0.587  | 1.01  | 0.955 | 1.1   | 0.055 |
| 1426679_at   | zinc finger protein 706                                          | Zfp706            | 1.25  | 0.165 | 1.44 | 0.040 | 1.11  | 0.181  | 1.16  | 0.002 | 1.12  | 0.102 |
| 1433946_at   | zinc finger protein interacting with K protein 1                 | Zik1              | 1.13  | 0.031 | 1.44 | 0.041 | 1.36  | 0.002  | 1.22  | 0.041 | 1.23  | 0.015 |
| 1419661_at   | RIKEN cDNA 1600012F09 gene /// hypothetical LOC624446            | 1600012F09Rik /// | -1.04 | 0.628 | 1.43 | 0.028 | 1.02  | 0.973  | 1.09  | 0.787 | -1    | 0.835 |
| 1443064_at   | RIKEN cDNA 9130004C02 gene                                       | 9130004C02Rik     | 2.1   | 0.170 | 1.43 | 0.022 | 1.02  | 0.400  | 1.36  | 0.850 | 1.76  | 0.304 |
| 1419262_at   | acyl-Coenzyme A dehydrogenase family, member 8                   | Acad8             | 1.21  | 0.047 | 1.43 | 0.010 | 1.19  | 0.021  | 1.12  | 0.062 | 1.07  | 0.320 |
| 1427472_a_at | complement component 8, beta subunit                             | C8b               | 2.47  | 0.181 | 1.43 | 0.047 | -1.26 | 0.118  | 1.15  | 0.630 | -1.57 | 0.221 |
| 1452529_a_at | cAMP responsive element binding protein 1                        | Creb1             | 1.17  | 0.532 | 1.43 | 0.029 | 1.21  | 0.051  | 1.09  | 0.263 | 1.17  | 0.048 |

|              |                                                                        |               |       |       |      |       |       |       |       |       |       |       |
|--------------|------------------------------------------------------------------------|---------------|-------|-------|------|-------|-------|-------|-------|-------|-------|-------|
| 1416106_at   | KTI12 homolog, chromatin associated ( <i>S. cerevisiae</i> )           | Kti12         | 1.11  | 0.270 | 1.43 | 0.013 | 1.16  | 0.005 | 1.2   | 0.008 | 1.22  | 0.013 |
| 1416543_at   | nuclear factor, erythroid derived 2, like 2                            | Nfe2l2        | 1.18  | 0.148 | 1.43 | 0.035 | 1.1   | 0.265 | 1.15  | 0.019 | 1.2   | 0.018 |
| 1422092_at   | 6-phosphofructo-2-kinase/fructose-2,6-biphosphatase 2                  | Pfkfb2        | 1.3   | 0.489 | 1.43 | 0.001 | 1.03  | 0.755 | 1.03  | 0.819 | -1.28 | 0.147 |
| 1428543_at   | phosphoribosyl pyrophosphate amidotransferase                          | Ppat          | 1.07  | 0.588 | 1.43 | 0.012 | 1.14  | 0.390 | 1.12  | 0.020 | 1.17  | 0.156 |
| 1454843_at   | phosphoribosyl pyrophosphate synthetase 2                              | Prps2         | 1.25  | 0.260 | 1.43 | 0.040 | 1.07  | 0.255 | 1.07  | 0.432 | 1.1   | 0.151 |
| 1441128_at   | Renal tumor antigen                                                    | Rage          | 1.6   | 0.024 | 1.43 | 0.018 | 1.15  | 0.092 | -1.23 | 0.160 | 1.16  | 0.803 |
| 1424156_at   | retinoblastoma-like 1 (p107)                                           | Rbl1          | 1.38  | 0.021 | 1.43 | 0.000 | 1.22  | 0.035 | 1.08  | 0.197 | 1.29  | 0.032 |
| 1416928_at   | RNA binding motif protein 12                                           | Rbm12         | 1.08  | 0.306 | 1.43 | 0.026 | 1.13  | 0.235 | 1.12  | 0.315 | 1.17  | 0.210 |
| 1456041_at   | sorting nexin 16                                                       | Snx16         | 1.21  | 0.016 | 1.43 | 0.047 | 1.08  | 0.253 | 1.02  | 0.370 | 1.15  | 0.123 |
| 1416849_at   | zinc finger, CDGSH-type domain 1                                       | Zcd1          | 1.28  | 0.090 | 1.43 | 0.047 | 1.17  | 0.175 | 1.04  | 0.477 | 1.11  | 0.255 |
| 1431252_a_at | zinc finger protein 655                                                | Zfp655        | 1.21  | 0.383 | 1.43 | 0.044 | 1.06  | 0.799 | 1.28  | 0.015 | 1.23  | 0.120 |
| 1452880_at   | zinc finger, HIT type 3                                                | Znhit3        | 1.19  | 0.211 | 1.43 | 0.003 | 1.22  | 0.043 | 1.1   | 0.274 | 1.21  | 0.017 |
| 1428452_at   | RIKEN cDNA 2810025M15 gene                                             | 2810025M15Rik | 1.24  | 0.224 | 1.42 | 0.010 | 1.14  | 0.057 | 1.18  | 0.078 | 1.14  | 0.200 |
| 1430363_at   | RIKEN cDNA 4933407O12 gene                                             | 4933407O12Rik | 1.18  | 0.588 | 1.42 | 0.027 | 1.55  | 0.098 | 1.22  | 0.217 | 1.27  | 0.430 |
| 1456808_at   | RIKEN cDNA 4933426M11 gene                                             | 4933426M11Rik | 1.12  | 0.528 | 1.42 | 0.000 | -1.12 | 0.368 | 1.06  | 0.746 | 1.22  | 0.563 |
| 1429048_at   | biogenesis of lysosome-related organelles complex-1, subunit           | Bloc1s2       | 1.08  | 0.502 | 1.42 | 0.048 | 1.11  | 0.415 | 1.11  | 0.051 | 1.19  | 0.013 |
| 1447420_at   | bromodomain containing 1                                               | Brd1          | 1.71  | 0.348 | 1.42 | 0.015 | -1.2  | 0.235 | 1.28  | 0.474 | 1.22  | 0.257 |
| 1450467_at   | basoon                                                                 | Bsn           | 1.55  | 0.375 | 1.42 | 0.025 | -2.16 | 0.005 | 1.29  | 0.650 | 1.22  | 0.747 |
| 1450016_at   | cyclin G1                                                              | Cng1          | 1.14  | 0.019 | 1.42 | 0.008 | 1.14  | 0.124 | 1.28  | 0.051 | 1.22  | 0.180 |
| 1434981_at   | RIKEN cDNA E130303B06 gene                                             | E130303B06Rik | 1.28  | 0.005 | 1.42 | 0.029 | 1.23  | 0.277 | 1.02  | 0.574 | 1.32  | 0.160 |
| 1454635_at   | F-box and leucine-rich repeat protein 3                                | Fbxl3         | 1.35  | 0.136 | 1.42 | 0.024 | 1.14  | 0.232 | 1.07  | 0.409 | 1.32  | 0.073 |
| 1448767_s_at | gap junction membrane channel protein beta 1                           | Gjb1          | -1.1  | 0.208 | 1.42 | 0.041 | -1.11 | 0.518 | 1.38  | 0.439 | 1.12  | 0.695 |
| 1428532_at   | integrator complex subunit 7                                           | Ints7         | 1.37  | 0.386 | 1.42 | 0.049 | 1.49  | 0.045 | 1.11  | 0.424 | 1.41  | 0.030 |
| 1434770_at   | IQ calmodulin-binding motif containing 1                               | Iqcb1         | 1.18  | 0.343 | 1.42 | 0.034 | 1.1   | 0.488 | 1.16  | 0.288 | -1.08 | 0.420 |
| 1450722_at   | nucleoporin 50                                                         | Nup50         | 1.09  | 0.047 | 1.42 | 0.002 | 1.08  | 0.441 | 1.07  | 0.256 | 1.09  | 0.430 |
| 1417890_at   | pyridoxal (pyridoxine, vitamin B6) phosphatase                         | Pdpx          | 1.03  | 0.382 | 1.42 | 0.004 | 1.27  | 0.074 | 1.45  | 0.004 | 1.38  | 0.105 |
| 1424554_at   | protein phosphatase 1, regulatory (inhibitor) subunit 8                | Ppp1r8        | 1.05  | 0.486 | 1.42 | 0.001 | 1.17  | 0.134 | 1.16  | 0.053 | 1.26  | 0.017 |
| 1438481_at   | PRP4 pre-mRNA processing factor 4 homolog (yeast)                      | Prpf4         | 1.3   | 0.058 | 1.42 | 0.002 | 1.59  | 0.023 | 1.09  | 0.362 | 1.3   | 0.187 |
| 1421528_a_at | surfeit gene 5                                                         | Surf5         | 1.03  | 0.625 | 1.42 | 0.007 | 1.34  | 0.007 | 1.3   | 0.009 | 1.48  | 0.025 |
| 1422532_at   | xeroderma pigmentosum, complementation group C                         | Xpc           | 1.33  | 0.130 | 1.42 | 0.018 | 1.1   | 0.101 | 1.23  | 0.191 | 1.47  | 0.047 |
| 1434355_at   | zinc finger protein 617                                                | Zfp617        | 1.25  | 0.062 | 1.42 | 0.034 | 1.09  | 0.715 | 1.21  | 0.031 | 1.3   | 0.006 |
| 1453173_at   | RIKEN cDNA 2310005E10 gene                                             | 2310005E10Rik | 1.3   | 0.107 | 1.41 | 0.037 | -1.05 | 0.426 | 1.07  | 0.405 | 1.01  | 0.968 |
| 1444992_at   | expressed sequence AI120166                                            | AI120166      | 1.59  | 0.042 | 1.41 | 0.017 | 1.06  | 0.212 | -1.06 | 0.591 | -1.33 | 0.074 |
| 1423620_at   | centromere protein Q                                                   | Cenpq         | 1.45  | 0.070 | 1.41 | 0.005 | 1.13  | 0.100 | 1.16  | 0.039 | -1.03 | 0.897 |
| 1457839_at   | DEAH (Asp-Glu-Ala-His) box polypeptide 40                              | Dhx40         | 1.41  | 0.071 | 1.41 | 0.048 | 1.23  | 0.112 | -1.45 | 0.012 | 1.18  | 0.345 |
| 1428185_at   | potassium channel tetramerisation domain containing 18                 | Kctd18        | 1.12  | 0.398 | 1.41 | 0.012 | 1.26  | 0.014 | 1.26  | 0.026 | 1.12  | 0.294 |
| 1440341_at   | similar to SMF protein                                                 | LOC629345     | 1.16  | 0.603 | 1.41 | 0.029 | -1.01 | 0.624 | 1.24  | 0.051 | 1.13  | 0.713 |
| 1452289_a_at | ring finger protein 135                                                | Rnf135        | 1.12  | 0.651 | 1.41 | 0.024 | 1.12  | 0.128 | 1.26  | 0.054 | 1.36  | 0.088 |
| 1433675_at   | small nucleolar RNA, C/D box 22                                        | Snord22       | 1.27  | 0.393 | 1.41 | 0.046 | 1.11  | 0.315 | 1.14  | 0.109 | 1.01  | 0.949 |
| 1418828_at   | three prime histone mRNA exonuclease 1                                 | Thex1         | 1.25  | 0.295 | 1.41 | 0.030 | 1.17  | 0.278 | 1.18  | 0.236 | 1.12  | 0.138 |
| 1424492_at   | transient receptor potential cation channel, subfamily C, mem          | Trpc2         | -1.03 | 0.509 | 1.41 | 0.042 | -1.1  | 0.290 | 1.28  | 0.693 | 1.73  | 0.354 |
| 1428218_a_at | RIKEN cDNA 1600012H06 gene                                             | 1600012H06Rik | 1.18  | 0.230 | 1.4  | 0.041 | 1.12  | 0.365 | 1.32  | 0.011 | 1.17  | 0.159 |
| 1440381_at   | RIKEN cDNA 2410085M17 gene                                             | 2410085M17Rik | 1.23  | 0.090 | 1.4  | 0.035 | 1.28  | 0.060 | 1.17  | 0.138 | 1.16  | 0.121 |
| 1453040_at   | RIKEN cDNA 2810402A17 gene                                             | 2810402A17Rik | 1.27  | 0.062 | 1.4  | 0.007 | -1.07 | 0.684 | 1.02  | 0.701 | 1.16  | 0.691 |
| 1430041_at   | RIKEN cDNA 6330548G22 gene                                             | 6330548G22Rik | 1.17  | 0.590 | 1.4  | 0.026 | 1.02  | 0.809 | 1.03  | 0.723 | -1.11 | 0.252 |
| 1423884_at   | cirrhosis, autosomal recessive 1A (human)                              | Cirh1a        | 1.11  | 0.342 | 1.4  | 0.024 | 1.13  | 0.059 | 1.09  | 0.026 | 1.05  | 0.536 |
| 1435320_at   | CTD (carboxy-terminal domain, RNA polymerase II, polypept              | Ctdspl2       | 1.22  | 0.087 | 1.4  | 0.029 | 1.09  | 0.344 | 1.28  | 0.014 | 1.04  | 0.889 |
| 1435926_at   | RIKEN cDNA E030003F13 gene                                             | E030003F13Rik | -1.03 | 0.574 | 1.4  | 0.017 | 1.23  | 0.022 | 1.27  | 0.028 | 1.29  | 0.047 |
| 1449559_at   | homeo box, msh-like 2                                                  | Msx2          | 1.21  | 0.051 | 1.4  | 0.002 | 1.13  | 0.346 | 1.13  | 0.015 | 1.24  | 0.015 |
| 1452026_a_at | phospholipase A2, group XIII                                           | Pla2g12a      | 1.42  | 0.301 | 1.4  | 0.004 | 1.1   | 0.546 | 1.09  | 0.204 | 1.07  | 0.532 |
| 1449162_at   | processing of precursor 7, ribonuclease P family, ( <i>S. cerevisi</i> | Pop7          | 1.21  | 0.208 | 1.4  | 0.014 | 1.17  | 0.119 | 1.11  | 0.043 | 1.3   | 0.017 |
| 1455268_at   | zinc finger, CSL domain containing 2                                   | Zcsl2         | 1.11  | 0.191 | 1.4  | 0.003 | 1.22  | 0.046 | 1.17  | 0.168 | 1.32  | 0.018 |
| 1450644_at   | zinc finger protein 36, C3H type-like 1                                | Zfp36l1       | -1.03 | 0.752 | 1.4  | 0.022 | 1.55  | 0.030 | 1.33  | 0.016 | 1.57  | 0.000 |
| 1424099_at   | RIKEN cDNA 2310016C16 gene                                             | 2310016C16Rik | 1.23  | 0.219 | 1.39 | 0.035 | 1.05  | 0.369 | 1.07  | 0.024 | 1.1   | 0.182 |
| 1419074_at   | RIKEN cDNA 2510006C20 gene                                             | 2510006C20Rik | 1.11  | 0.163 | 1.39 | 0.015 | 1.25  | 0.036 | 1.14  | 0.010 | 1.38  | 0.042 |
| 1434567_at   | RIKEN cDNA 4732496O08 gene                                             | 4732496O08Rik | -1.02 | 0.654 | 1.39 | 0.009 | 1.22  | 0.043 | 1.12  | 0.085 | 1.19  | 0.043 |
| 1451232_at   | CD151 antigen                                                          | Cd151         | 1.22  | 0.569 | 1.39 | 0.038 | 1.32  | 0.100 | 1.35  | 0.143 | 1.24  | 0.270 |
| 1433594_at   | COMM domain containing 2                                               | Commd2        | 1.28  | 0.194 | 1.39 | 0.048 | 1.15  | 0.442 | 1.14  | 0.029 | 1.13  | 0.417 |



|              |                                                                 |               |       |       |      |       |       |       |       |       |       |       |
|--------------|-----------------------------------------------------------------|---------------|-------|-------|------|-------|-------|-------|-------|-------|-------|-------|
| 1423880_at   | DNA segment, Chr 10, Wayne State University 52, expresser       | D10Wsu52e     | 1.29  | 0.348 | 1.39 | 0.039 | 1.02  | 0.740 | 1.05  | 0.174 | 1.04  | 0.517 |
| 1434606_at   | v-erb-b2 erythroblastic leukemia viral oncogene homolog 3 (ε    | ErbB3         | -1.25 | 0.351 | 1.39 | 0.004 | -1.98 | 0.082 | 1     | 0.719 | 1.03  | 0.791 |
| 1426607_at   | similar to CG10866-PA                                           | LOC633640     | 1.05  | 0.536 | 1.39 | 0.017 | 1.12  | 0.025 | 1.14  | 0.110 | 1.28  | 0.131 |
| 1460358_s_at | nudix (nucleoside diphosphate linked moiety X)-type motif 22    | Nudt22        | 1.01  | 0.750 | 1.39 | 0.003 | 1.3   | 0.312 | 1.02  | 0.926 | 1.12  | 0.052 |
| 1455122_at   | patched domain containing 2                                     | Ptchd2        | 1.38  | 0.149 | 1.39 | 0.042 | -1.48 | 0.037 | 2.27  | 0.042 | 1.44  | 0.918 |
| 1450630_at   | queuine tRNA-ribosyltransferase 1                               | Qtrt1         | 1.31  | 0.241 | 1.39 | 0.014 | 1.11  | 0.759 | 1.2   | 0.024 | 1.26  | 0.106 |
| 1416721_s_at | splicing factor, arginine/serine-rich 6                         | Sfrs6         | 1.14  | 0.037 | 1.39 | 0.006 | 1.45  | 0.017 | 1.34  | 0.010 | 1.3   | 0.010 |
| 1424735_at   | solute carrier family 25 (mitochondrial carrier, phosphate carr | Slc25a25      | 1.24  | 0.234 | 1.39 | 0.016 | -1    | 0.889 | 1.14  | 0.145 | 1.11  | 0.266 |
| 1434317_s_at | testis expressed gene 10                                        | Tex10         | 1.13  | 0.088 | 1.39 | 0.032 | 1.04  | 0.812 | -1.07 | 0.180 | 1.02  | 0.620 |
| 1445235_at   | YTH domain family 3                                             | Ythdf3        | 1.15  | 0.531 | 1.39 | 0.015 | -1.36 | 0.190 | 1.91  | 0.026 | -1.02 | 0.857 |
| 1433705_at   | zinc finger protein 213                                         | Zfp213        | 1.04  | 0.972 | 1.39 | 0.007 | 1.3   | 0.020 | 1.31  | 0.007 | 1.52  | 0.023 |
| 1438460_at   | zinc finger, MYM-type 4                                         | Zmym4         | 1.07  | 0.382 | 1.39 | 0.018 | 1.03  | 0.905 | -1.07 | 0.301 | 1.01  | 0.761 |
| 1429812_at   | RIKEN cDNA 2610002D18 gene                                      | 2610002D18Rik | 1.01  | 0.946 | 1.38 | 0.034 | 1.42  | 0.060 | 1.27  | 0.186 | 1.56  | 0.040 |
| 1457709_a_at | RIKEN cDNA A930005H10 gene                                      | A930005H10Rik | 1.03  | 0.821 | 1.38 | 0.014 | -1.13 | 0.236 | 1.24  | 0.423 | -1.13 | 0.232 |
| 1427959_at   | abhydrolase domain containing 10                                | Abhd10        | 1.04  | 0.551 | 1.38 | 0.026 | 1.27  | 0.027 | 1.25  | 0.029 | 1.29  | 0.029 |
| 1416631_at   | adaptor-related protein complex AP-4, beta 1                    | Ap4b1         | 1.22  | 0.516 | 1.38 | 0.031 | 1.28  | 0.009 | 1.08  | 0.246 | 1.2   | 0.002 |
| 1434065_at   | CWF19-like 1, cell cycle control (S. pombe)                     | Cwf19l1       | 1.1   | 0.258 | 1.38 | 0.016 | 1.1   | 0.300 | 1.08  | 0.135 | 1.15  | 0.139 |
| 1423495_at   | 2-4-dienoyl-Coenzyme A reductase 2, peroxisomal                 | Decr2         | 1.09  | 0.528 | 1.38 | 0.050 | 1.01  | 0.781 | 1.02  | 0.889 | -1    | 0.730 |
| 1420491_at   | eukaryotic translation initiation factor 2, subunit 1 alpha     | Eif2s1        | 1.41  | 0.180 | 1.38 | 0.029 | 1.04  | 0.758 | 1.18  | 0.293 | 1.04  | 0.772 |
| 1418839_at   | glomulin, FKBP associated protein                               | Glmn          | 1.25  | 0.247 | 1.38 | 0.032 | -1.08 | 0.490 | 1.27  | 0.345 | -1.05 | 0.715 |
| 1442614_at   | interleukin 1 receptor accessory protein                        | Il1rap        | 1.14  | 0.490 | 1.38 | 0.025 | 1.24  | 0.584 | -1.43 | 0.199 | 1.39  | 0.012 |
| 1429833_at   | lymphocyte antigen 6 complex, locus G6E                         | Ly6g6e        | 1.32  | 0.377 | 1.38 | 0.040 | 1.03  | 0.740 | -1.47 | 0.194 | 1.23  | 0.456 |
| 1424001_at   | Mki67 (FHA domain) interacting nucleolar phosphoprotein         | Mki67ip       | 1.16  | 0.375 | 1.38 | 0.030 | 1.1   | 0.013 | 1.21  | 0.019 | 1.15  | 0.120 |
| 1424019_at   | nucleolar protein 1                                             | No1           | 1.04  | 0.555 | 1.38 | 0.009 | 1.06  | 0.631 | 1.23  | 0.025 | 1.19  | 0.092 |
| 1455002_at   | protein tyrosine phosphatase 4a1                                | Ptp4a1        | 1.06  | 0.052 | 1.38 | 0.047 | 1.21  | 0.058 | 1.37  | 0.010 | 1.29  | 0.002 |
| 1448899_s_at | RAD51 associated protein 1                                      | Rad51ap1      | 1.21  | 0.064 | 1.38 | 0.022 | 1.06  | 0.392 | 1.22  | 0.033 | 1.21  | 0.029 |
| 1422859_a_at | ribosomal protein L23                                           | Rpl23         | 1.14  | 0.434 | 1.38 | 0.034 | 1.08  | 0.656 | 1.13  | 0.255 | 1.03  | 0.888 |
| 1418162_at   | toll-like receptor 4                                            | Tlr4          | 1.2   | 0.096 | 1.38 | 0.047 | 1.28  | 0.630 | 1.21  | 0.116 | 1.04  | 0.586 |
| 1448706_at   | Traf and Tnf receptor associated protein                        | Ttrap         | 1.35  | 0.128 | 1.38 | 0.004 | 1.13  | 0.120 | 1.33  | 0.012 | 1.17  | 0.100 |
| 1456607_at   | valosin containing protein (p97)/p47 complex interacting prot   | Vcpi1         | 1.07  | 0.065 | 1.38 | 0.034 | -1.01 | 0.870 | -1.02 | 0.907 | 1     | 0.812 |
| 1436312_at   | zinc finger protein, subfamily 1A, 1 (Ikaros)                   | Zfpn1a1       | 1.94  | 0.234 | 1.38 | 0.009 | 1.74  | 0.347 | 1.34  | 0.420 | -1.58 | 0.174 |
| 1420548_a_at | RIKEN cDNA 2310008H09 gene                                      | 2310008H09Rik | 1.2   | 0.028 | 1.37 | 0.004 | 1.12  | 0.140 | 1.15  | 0.264 | 1.07  | 0.666 |
| 1423838_s_at | RIKEN cDNA 2400003C14 gene                                      | 2400003C14Rik | 1.06  | 0.358 | 1.37 | 0.011 | 1.07  | 0.264 | 1.14  | 0.005 | 1.08  | 0.169 |
| 1429371_at   | RIKEN cDNA 2810426N06 gene                                      | 2810426N06Rik | -1.2  | 0.187 | 1.37 | 0.000 | 1.24  | 0.749 | 1.01  | 0.950 | -1.07 | 0.663 |
| 1435724_at   | RIKEN cDNA 4933400N17 gene                                      | 4933400N17Rik | 1.46  | 0.076 | 1.37 | 0.034 | 1.55  | 0.339 | -1.28 | 0.421 | -1.05 | 0.662 |
| 1436049_at   | RIKEN cDNA 5730589K01 gene                                      | 5730589K01Rik | 1.25  | 0.021 | 1.37 | 0.012 | 1.33  | 0.016 | 1.1   | 0.100 | 1.12  | 0.699 |
| 1450717_at   | angiogenin, ribonuclease A family, member 1                     | Ang1          | 1.39  | 0.202 | 1.37 | 0.023 | -1.19 | 0.065 | -1.21 | 0.038 | -1.19 | 0.043 |
| 1431527_at   | CD164 antigen                                                   | Cd164         | -1.16 | 0.608 | 1.37 | 0.013 | 1.32  | 0.635 | 1.09  | 0.526 | 1.24  | 0.318 |
| 1428092_at   | cell division cycle 5-like (S. pombe)                           | Cdc5l         | 1.17  | 0.426 | 1.37 | 0.021 | 1.01  | 0.869 | 1.03  | 0.623 | 1.05  | 0.726 |
| 1455734_at   | cereblon                                                        | Crbn          | 1.36  | 0.414 | 1.37 | 0.035 | 1.1   | 0.103 | -1.01 | 0.696 | -1.01 | 0.858 |
| 1426837_at   | methionyl aminopeptidase 1                                      | Metap1        | 1.22  | 0.387 | 1.37 | 0.013 | 1.15  | 0.313 | 1.24  | 0.142 | 1.1   | 0.031 |
| 1442302_at   | N-methylpurine-DNA glycosylase                                  | Mpg           | 1.19  | 0.464 | 1.37 | 0.049 | 1.21  | 0.414 | 1.4   | 0.336 | 1.1   | 0.171 |
| 1418941_at   | protocadherin beta 22                                           | Pcdhb22       | 1.94  | 0.416 | 1.37 | 0.039 | 1.21  | 0.520 | 1.05  | 0.821 | 1.47  | 0.176 |
| 1415736_at   | prefoldin 5                                                     | Pfdn5         | 1.26  | 0.212 | 1.37 | 0.030 | 1.04  | 0.403 | 1.05  | 0.329 | 1.11  | 0.267 |
| 1434076_at   | WD repeat domain 37                                             | Wdr37         | 1.14  | 0.382 | 1.37 | 0.046 | 1.09  | 0.349 | -1.03 | 0.557 | 1.05  | 0.466 |
| 1420110_s_at | zinc finger protein 334                                         | Zfp334        | 1.15  | 0.187 | 1.37 | 0.016 | 1.18  | 0.004 | 1.16  | 0.149 | 1.18  | 0.024 |
| 1456161_at   | RIKEN cDNA 0610040B10 gene                                      | 0610040B10Rik | 1.09  | 0.500 | 1.36 | 0.034 | 1.03  | 0.987 | 1.26  | 0.620 | 1.31  | 0.759 |
| 1419660_at   | RIKEN cDNA 1600012F09 gene                                      | 1600012F09Rik | 1.2   | 0.080 | 1.36 | 0.009 | 1.09  | 0.063 | 1.2   | 0.028 | 1.15  | 0.111 |
| 1416439_at   | RIKEN cDNA 2410015N17 gene                                      | 2410015N17Rik | 1.13  | 0.046 | 1.36 | 0.032 | 1.15  | 0.232 | 1.21  | 0.016 | 1.26  | 0.148 |
| 1456163_at   | RIKEN cDNA 2700049P18 gene                                      | 2700049P18Rik | 1.38  | 0.243 | 1.36 | 0.001 | 1.21  | 0.080 | 1.18  | 0.112 | 1.23  | 0.168 |
| 1427985_at   | RIKEN cDNA 9630042H07 gene                                      | 9630042H07Rik | 1.06  | 0.755 | 1.36 | 0.032 | 1.39  | 0.145 | 1.44  | 0.016 | 1.63  | 0.002 |
| 1448484_at   | S-adenosylmethionine decarboxylase 1                            | Amd1          | 1.09  | 0.091 | 1.36 | 0.010 | 1.12  | 0.017 | 1.17  | 0.063 | 1.12  | 0.022 |
| 1451246_s_at | aurora kinase B                                                 | Aurkb         | 1.11  | 0.005 | 1.36 | 0.019 | 1.18  | 0.041 | 1.2   | 0.005 | 1.29  | 0.028 |
| 1435406_at   | coiled-coil alpha-helical rod protein 1                         | Cchr1         | 1.12  | 0.375 | 1.36 | 0.020 | 1.23  | 0.009 | 1.02  | 0.842 | -1.05 | 0.464 |
| 1423701_at   | Coenzyme A synthase                                             | Coasy         | 1.14  | 0.627 | 1.36 | 0.010 | 1.01  | 0.948 | 1.13  | 0.088 | 1.24  | 0.066 |
| 1416023_at   | fatty acid binding protein 3, muscle and heart                  | Fabp3         | 1.18  | 0.242 | 1.36 | 0.035 | -1.06 | 0.427 | 1.04  | 0.171 | 1.03  | 0.918 |
| 1423348_at   | frizzled homolog 8 (Drosophila)                                 | Fzd8          | 1.24  | 0.138 | 1.36 | 0.016 | 1.11  | 0.163 | 1.31  | 0.119 | 1.07  | 0.649 |
| 1428608_at   | myosin light chain, regulatory B                                | Mylc2b        | 1.04  | 0.566 | 1.36 | 0.015 | 1.15  | 0.117 | 1.14  | 0.119 | 1.29  | 0.004 |

|              |                                                                                      |               |       |       |      |       |       |       |       |       |       |       |
|--------------|--------------------------------------------------------------------------------------|---------------|-------|-------|------|-------|-------|-------|-------|-------|-------|-------|
| 1434384_at   | nuclear receptor interacting protein 1                                               | Nrip1         | 1.09  | 0.303 | 1.36 | 0.030 | 1.03  | 0.840 | 1.02  | 0.550 | -1.09 | 0.161 |
| 1428277_at   | OTU domain containing 6B                                                             | Otud6b        | 1.19  | 0.044 | 1.36 | 0.032 | 1.02  | 0.989 | 1.08  | 0.432 | 1.28  | 0.040 |
| 1417035_at   | SAC3 domain containing 1                                                             | Sac3d1        | 1.04  | 0.715 | 1.36 | 0.026 | 1.23  | 0.034 | 1.23  | 0.023 | 1.28  | 0.048 |
| 1419656_at   | solute carrier family 25, member 36                                                  | Slc25a36      | 1.07  | 0.070 | 1.36 | 0.026 | 1     | 0.862 | 1.13  | 0.048 | 1.09  | 0.461 |
| 1437500_at   | Solute carrier family 39 (zinc transporter), member 12                               | Slc39a12      | -1.01 | 0.784 | 1.36 | 0.028 | 1.16  | 0.366 | 1.02  | 0.223 | 1.13  | 0.214 |
| 1440303_at   | Solute carrier family 7, member 6 opposite strand                                    | Slc7a6os      | 1.09  | 0.679 | 1.36 | 0.018 | 1.2   | 0.432 | 1.16  | 0.023 | 1.04  | 0.538 |
| 1416346_at   | translocase of inner mitochondrial membrane 8 homolog a1 (Timm8a1)                   | Timm8a1       | 1.14  | 0.110 | 1.36 | 0.014 | 1.14  | 0.003 | 1.2   | 0.006 | 1.16  | 0.141 |
| 1441646_at   | RIKEN cDNA 1110059P08 gene                                                           | 1110059P08Rik | 1.25  | 0.473 | 1.35 | 0.019 | 1.23  | 0.507 | -1.19 | 0.238 | -1.54 | 0.122 |
| 1426879_at   | RIKEN cDNA 1190005F20 gene                                                           | 1190005F20Rik | 1.13  | 0.410 | 1.35 | 0.034 | 1.21  | 0.034 | 1.08  | 0.425 | 1.14  | 0.323 |
| 1419635_at   | RIKEN cDNA 4833420G17 gene                                                           | 4833420G17Rik | 1.12  | 0.607 | 1.35 | 0.008 | 1.08  | 0.329 | 1.1   | 0.155 | 1.17  | 0.133 |
| 1421197_a_at | apoptotic chromatin condensation inducer 1                                           | Acin1         | 1.07  | 0.254 | 1.35 | 0.027 | 1.14  | 0.115 | 1.14  | 0.056 | 1.14  | 0.000 |
| 1443291_at   | Ankyrin 1, erythroid                                                                 | Ank1          | 1.73  | 0.786 | 1.35 | 0.049 | 1.13  | 0.738 | 1     | 0.292 | 3.16  | 0.079 |
| 1451747_a_at | autophagy-related 12 (yeast)                                                         | Atg12         | 1.05  | 0.129 | 1.35 | 0.001 | 1.16  | 0.287 | 1.23  | 0.038 | 1.04  | 0.701 |
| 1426002_a_at | cell division cycle 7 (S. cerevisiae)                                                | Cdc7          | 1.12  | 0.274 | 1.35 | 0.010 | 1.24  | 0.275 | 1.34  | 0.019 | 1.22  | 0.272 |
| 1435281_at   | carnitine palmitoyltransferase 1c                                                    | Cpt1c         | 1.16  | 0.207 | 1.35 | 0.020 | 1.18  | 0.159 | 1.1   | 0.139 | 1.24  | 0.046 |
| 1416751_a_at | DEAD (Asp-Glu-Ala-Asp) box polypeptide 20                                            | Ddx20         | 1.12  | 0.539 | 1.35 | 0.024 | 1.06  | 0.181 | 1.17  | 0.010 | 1.25  | 0.024 |
| 1452598_at   | GINS complex subunit 1 (Psf1 homolog)                                                | Gins1         | 1.14  | 0.153 | 1.35 | 0.035 | 1.16  | 0.013 | 1.04  | 0.603 | 1.08  | 0.169 |
| 1418367_x_at | histone 2, H3c1 /// histone 2, H2aa1 /// histone 1, H2ad /// histone 2H3c1 /// Hist2 |               | 1.36  | 0.291 | 1.35 | 0.026 | 1.04  | 0.402 | 1.14  | 0.100 | 1.05  | 0.629 |
| 1424639_a_at | 3-hydroxy-3-methylglutaryl-Coenzyme A lyase                                          | Hmgcl         | -1.05 | 0.112 | 1.35 | 0.005 | -1    | 0.886 | 1.11  | 0.090 | 1.21  | 0.180 |
| 1424430_at   | MTERF domain containing 2                                                            | Mterfd2       | 1.06  | 0.531 | 1.35 | 0.009 | 1.09  | 0.369 | 1.17  | 0.036 | 1.19  | 0.007 |
| 1422473_at   | phosphodiesterase 4B, cAMP specific                                                  | Pde4b         | 1.06  | 0.396 | 1.35 | 0.020 | 1.1   | 0.216 | 1.27  | 0.084 | 1.33  | 0.020 |
| 1416172_at   | pescadillo homolog 1, containing BRCT domain (zebrafish)                             | Pes1          | 1.11  | 0.788 | 1.35 | 0.044 | -1    | 0.991 | 1.15  | 0.128 | 1.16  | 0.069 |
| 1448282_at   | pleiotropic regulator 1, PRL1 homolog (Arabidopsis)                                  | Plrg1         | 1.18  | 0.483 | 1.35 | 0.047 | -1.02 | 0.655 | 1.15  | 0.035 | 1.05  | 0.032 |
| 1424258_at   | polymerase (RNA) II (DNA directed) polypeptide D                                     | Polr2d        | 1.19  | 0.122 | 1.35 | 0.023 | 1.17  | 0.023 | 1.12  | 0.018 | 1.11  | 0.111 |
| 1418491_a_at | pseudouridine synthase 3                                                             | Pus3          | 1.1   | 0.233 | 1.35 | 0.036 | -1.12 | 0.283 | 1.01  | 0.950 | -1.09 | 0.486 |
| 1452917_at   | replication factor C (activator 1) 5                                                 | Rfc5          | 1.17  | 0.382 | 1.35 | 0.008 | 1.2   | 0.099 | 1.16  | 0.085 | 1.2   | 0.073 |
| 1415802_at   | solute carrier family 16 (monocarboxylic acid transporters), m Slc16a1               | Slc16a1       | 1.16  | 0.411 | 1.35 | 0.023 | 1.17  | 0.009 | 1.19  | 0.001 | 1.28  | 0.010 |
| 1421147_at   | telomeric repeat binding factor 2                                                    | Terb2         | 1.1   | 0.233 | 1.35 | 0.006 | -1    | 0.859 | 1.08  | 0.204 | 1.07  | 0.271 |
| 1458088_at   | Ubiquitin-associated protein 2                                                       | Ubp2          | -1.24 | 0.301 | 1.35 | 0.026 | -1.01 | 0.677 | 1.26  | 0.366 | 1.46  | 0.360 |
| 1438669_at   | WD repeat domain 40A                                                                 | Wdr40a        | 1.02  | 0.775 | 1.35 | 0.004 | 1.1   | 0.537 | 1.28  | 0.010 | 1.03  | 0.917 |
| 1428294_at   | zinc finger protein 259                                                              | Zfp259        | 1.04  | 0.988 | 1.35 | 0.031 | 1.08  | 0.352 | 1.22  | 0.191 | 1.25  | 0.072 |
| 1417055_at   | RIKEN cDNA 0610009D07 gene                                                           | 0610009D07Rik | 1.22  | 0.189 | 1.34 | 0.010 | 1.13  | 0.438 | 1.09  | 0.714 | 1.16  | 0.087 |
| 1428908_at   | RIKEN cDNA 2600011C06 gene                                                           | 2600011C06Rik | 1.09  | 0.238 | 1.34 | 0.009 | 1.07  | 0.369 | 1     | 0.879 | -1.05 | 0.478 |
| 1439131_at   | RIKEN cDNA 4932441K18 gene                                                           | 4932441K18Rik | 1.1   | 0.142 | 1.34 | 0.014 | 1.1   | 0.428 | 1.06  | 0.147 | 1.23  | 0.419 |
| 1451221_at   | cDNA sequence BC018507                                                               | BC018507      | 1.4   | 0.165 | 1.34 | 0.029 | -1.1  | 0.015 | 1.02  | 0.662 | -1.23 | 0.099 |
| 1458541_at   | dynactin 4                                                                           | Dctn4         | 1.03  | 0.945 | 1.34 | 0.027 | 1.05  | 0.093 | 1.13  | 0.606 | 1.21  | 0.448 |
| 1459371_at   | Eukaryotic translation initiation factor 4E                                          | Eif4e         | 1.94  | 0.565 | 1.34 | 0.032 | 1.36  | 0.957 | -1.64 | 0.093 | -1.01 | 0.457 |
| 1432330_at   | complement factor H-like                                                             | LOC381294     | 1.38  | 0.654 | 1.34 | 0.010 | 1.24  | 0.635 | -1.5  | 0.182 | 2.39  | 0.050 |
| 1459592_a_at | similar to NFkB interacting protein 1                                                | LOC669005     | 1.03  | 0.868 | 1.34 | 0.022 | 1.1   | 0.329 | 1.05  | 0.242 | 1.3   | 0.149 |
| 1455217_at   | leucine-rich repeats and immunoglobulin-like domains 2                               | Lrig2         | 1.14  | 0.363 | 1.34 | 0.020 | -1.24 | 0.018 | -1.13 | 0.351 | -1.17 | 0.285 |
| 1453725_a_at | mitochondrial ribosomal protein S7                                                   | Mrps7         | 1.17  | 0.227 | 1.34 | 0.038 | 1.06  | 0.343 | 1.09  | 0.089 | 1.16  | 0.080 |
| 1456104_at   | proteasome (prosome, macropain) 26S subunit, non-ATPase                              | Psmc11        | 1.32  | 0.333 | 1.34 | 0.038 | 1.13  | 0.159 | 1.01  | 0.947 | -1.08 | 0.528 |
| 1415674_a_at | trafficking protein particle complex 4                                               | Trappc4       | 1.25  | 0.226 | 1.34 | 0.038 | 1.1   | 0.110 | 1.06  | 0.083 | 1.15  | 0.084 |
| 1448162_at   | vascular cell adhesion molecule 1                                                    | Vcam1         | 1.22  | 0.191 | 1.34 | 0.014 | 1.38  | 0.091 | 1.17  | 0.071 | 1.2   | 0.016 |
| 1416890_at   | WD repeat domain 74                                                                  | Wdr74         | 1.11  | 0.298 | 1.34 | 0.005 | 1.11  | 0.547 | 1.19  | 0.102 | 1.2   | 0.139 |
| 1422844_a_at | WD repeat domain 77                                                                  | Wdr77         | 1.11  | 0.573 | 1.34 | 0.030 | 1.11  | 0.048 | 1.08  | 0.051 | 1.17  | 0.001 |
| 1453477_at   | zinc finger CCCH type containing 6                                                   | Zc3h6         | 1.71  | 0.038 | 1.34 | 0.013 | 1.24  | 0.952 | -1.04 | 0.789 | 2.06  | 0.285 |
| 1424192_at   | RIKEN cDNA 1500011H22 gene                                                           | 1500011H22Rik | 1.07  | 0.393 | 1.33 | 0.001 | 1.18  | 0.001 | 1.21  | 0.023 | 1.12  | 0.016 |
| 1433867_at   | RIKEN cDNA 1810030O07 gene                                                           | 1810030O07Rik | 1.06  | 0.492 | 1.33 | 0.020 | 1.03  | 0.278 | 1.07  | 0.039 | 1.15  | 0.008 |
| 1417075_at   | RIKEN cDNA 2010309E21 gene                                                           | 2010309E21Rik | 1.19  | 0.155 | 1.33 | 0.010 | 1.08  | 0.546 | 1.12  | 0.027 | 1.18  | 0.027 |
| 1450425_a_at | RIKEN cDNA 2700062C07 gene                                                           | 2700062C07Rik | 1.15  | 0.387 | 1.33 | 0.021 | 1.15  | 0.307 | 1.15  | 0.079 | 1.2   | 0.299 |
| 1424451_at   | acetyl-Coenzyme A acyltransferase 1B                                                 | Acaa1b        | -1.33 | 0.332 | 1.33 | 0.038 | -2.06 | 0.024 | 1.07  | 0.807 | 1.92  | 0.641 |
| 1451439_at   | cDNA sequence BC027231                                                               | BC027231      | 1.07  | 0.530 | 1.33 | 0.030 | 1.11  | 0.192 | 1.16  | 0.011 | 1.01  | 0.950 |
| 1424429_s_at | coiled-coil domain containing 95                                                     | Ccdc95        | -1.04 | 0.555 | 1.33 | 0.005 | 1.17  | 0.385 | 1.25  | 0.003 | 1.23  | 0.023 |
| 1418579_at   | centrin 2                                                                            | Cetn2         | 1.28  | 0.050 | 1.33 | 0.038 | 1.1   | 0.074 | 1.13  | 0.006 | 1     | 0.849 |
| 1449820_at   | cortistatin                                                                          | Cort          | 1.26  | 0.338 | 1.33 | 0.046 | 1.15  | 0.457 | 1.11  | 0.945 | -1.13 | 0.139 |
| 1419645_at   | cleavage stimulation factor, 3' pre-RNA subunit 2                                    | Csf2          | 1.23  | 0.163 | 1.33 | 0.023 | 1.14  | 0.043 | 1.09  | 0.063 | 1.24  | 0.003 |
| 1422476_at   | interferon gamma inducible protein 30                                                | Ifi30         | 1.06  | 0.359 | 1.33 | 0.024 | 1.18  | 0.107 | 1.12  | 0.075 | 1.25  | 0.093 |

|              |                                                                     |                    |       |       |      |       |       |       |       |       |       |       |
|--------------|---------------------------------------------------------------------|--------------------|-------|-------|------|-------|-------|-------|-------|-------|-------|-------|
| 1416898_a_at | interferon regulatory factor 3                                      | Irf3               | 1.68  | 0.315 | 1.33 | 0.015 | 1.16  | 0.056 | 1.16  | 0.164 | 1.16  | 0.096 |
| 1448531_at   | lamin B2 /// similar to Lamin-B2                                    | Lmnb2 /// LOC671   | 1.18  | 0.177 | 1.33 | 0.038 | 1.11  | 0.192 | 1.07  | 0.863 | 1.24  | 0.228 |
| 1429307_s_at | leucine zipper and CTNBP1 domain containing                         | Lzic               | 1.16  | 0.285 | 1.33 | 0.029 | 1.14  | 0.129 | 1.07  | 0.278 | 1.13  | 0.034 |
| 1416212_at   | mago-nashi homolog, proliferation-associated (Drosophila)           | Magoh              | 1.21  | 0.154 | 1.33 | 0.040 | 1.06  | 0.153 | 1.04  | 0.426 | 1.07  | 0.141 |
| 1426653_at   | minichromosome maintenance deficient 3 (S. cerevisiae)              | Mcm3               | 1.07  | 0.767 | 1.33 | 0.040 | 1.26  | 0.110 | 1.16  | 0.204 | 1.07  | 0.468 |
| 1424908_at   | mitochondrial methionyl-tRNA formyltransferase                      | Mtfmt              | 1.15  | 0.059 | 1.33 | 0.033 | 1.17  | 0.061 | 1.29  | 0.004 | 1.19  | 0.010 |
| 1449550_at   | myosin IC                                                           | Myo1c              | 1.05  | 0.348 | 1.33 | 0.019 | 1.3   | 0.048 | 1.25  | 0.012 | 1.32  | 0.020 |
| 1419753_at   | nuclear transcription factor, X-box binding 1                       | Nfx1               | 1.14  | 0.468 | 1.33 | 0.034 | 1.22  | 0.245 | 1.29  | 0.007 | 1.21  | 0.101 |
| 1452294_at   | protocadherin 1                                                     | Pcdh1              | -1.45 | 0.202 | 1.33 | 0.032 | 1     | 0.582 | -1.57 | 0.034 | 1.42  | 0.783 |
| 1415754_at   | polymerase (RNA) II (DNA directed) polypeptide F                    | Poli2f             | 1.23  | 0.221 | 1.33 | 0.003 | 1.07  | 0.188 | 1.02  | 0.759 | 1.1   | 0.198 |
| 1416218_x_at | ribosomal protein L37a /// similar to 60S ribosomal protein L3      | Rpl37a /// LOC625  | 1.17  | 0.342 | 1.33 | 0.026 | 1.17  | 0.006 | 1.12  | 0.016 | 1.09  | 0.137 |
| 1438900_at   | SAC1 (suppressor of actin mutations 1, homolog)-like (S. cer        | Sacm1l             | 1.73  | 0.234 | 1.33 | 0.030 | 1.19  | 0.872 | -1.2  | 0.258 | -1.26 | 0.163 |
| 1451596_a_at | sphingosine kinase 1                                                | Sphk1              | 1.07  | 0.348 | 1.33 | 0.015 | 1.19  | 0.192 | 1.27  | 0.000 | 1.37  | 0.022 |
| 1415774_at   | signal transducer and activator of transcription interacting pro    | Statip1            | 1.38  | 0.361 | 1.33 | 0.046 | -1.05 | 0.552 | -1.18 | 0.069 | 1.04  | 0.864 |
| 1424938_at   | six transmembrane epithelial antigen of the prostate 1              | Steap1             | 1.13  | 0.760 | 1.33 | 0.020 | 1.11  | 0.301 | 1.09  | 0.175 | 1.16  | 0.039 |
| 1434708_at   | von Hippel-Lindau syndrome homolog                                  | Vhlh               | 1.01  | 0.876 | 1.33 | 0.001 | 1.25  | 0.030 | 1.17  | 0.031 | 1.15  | 0.071 |
| 1452581_at   | RIKEN cDNA 2610304G08 gene                                          | 2610304G08Rik      | 1.19  | 0.166 | 1.32 | 0.025 | 1.28  | 0.287 | -1.14 | 0.068 | 1.07  | 0.612 |
| 1424212_at   | RIKEN cDNA 9430023L20 gene                                          | 9430023L20Rik      | -1.03 | 0.712 | 1.32 | 0.024 | 1.16  | 0.016 | 1.07  | 0.091 | 1.2   | 0.027 |
| 1424020_at   | ADP-ribosylation factor-like 6 interacting protein 6 /// similar to | Arf16p6 /// LOC674 | 1.07  | 0.892 | 1.32 | 0.039 | 1.28  | 0.154 | -1.09 | 0.471 | 1.06  | 0.319 |
| 1433611_s_at | BUD31 homolog (yeast)                                               | Bud31              | 1.28  | 0.084 | 1.32 | 0.040 | 1.04  | 0.830 | 1.04  | 0.659 | 1.02  | 0.744 |
| 1418330_at   | CCCTC-binding factor                                                | Ctcf               | 1.19  | 0.003 | 1.32 | 0.022 | 1.1   | 0.212 | 1.06  | 0.270 | -1.01 | 0.711 |
| 1416268_at   | E26 avian leukemia oncogene 2, 3' domain                            | Ets2               | 1.03  | 0.898 | 1.32 | 0.027 | 1.26  | 0.064 | 1.3   | 0.047 | 1.2   | 0.020 |
| 1424685_at   | exosome component 4                                                 | Exosc4             | 1.22  | 0.361 | 1.32 | 0.038 | 1.14  | 0.083 | 1.13  | 0.092 | 1.22  | 0.013 |
| 1424300_at   | gem (nuclear organelle) associated protein 6                        | Gemin6             | 1.19  | 0.010 | 1.32 | 0.005 | 1.2   | 0.030 | 1.3   | 0.003 | 1.16  | 0.027 |
| 1452272_a_at | growth factor, erv1 (S. cerevisiae)-like (augmenter of liver reg    | Gfer               | -1.04 | 0.433 | 1.32 | 0.021 | 1.08  | 0.652 | 1.05  | 0.507 | 1.06  | 0.523 |
| 1439686_at   | Muscleblind-like 1 (Drosophila)                                     | Mbnl1              | 1.43  | 0.272 | 1.32 | 0.032 | -1.08 | 0.313 | 2.69  | 0.165 | 1.08  | 0.786 |
| 1448787_at   | modulator of apoptosis 1                                            | Moap1              | 1.09  | 0.018 | 1.32 | 0.014 | 1.15  | 0.130 | 1.12  | 0.076 | 1.18  | 0.057 |
| 1455330_at   | nucleolar protein 9                                                 | Nol9               | 1.14  | 0.446 | 1.32 | 0.012 | 1.04  | 0.198 | 1.14  | 0.009 | 1.2   | 0.019 |
| 1451909_a_at | PRP4 pre-mRNA processing factor 4 homolog B (yeast)                 | Prpf4b             | 1.06  | 0.716 | 1.32 | 0.046 | 1.2   | 0.288 | 1.12  | 0.268 | -1.02 | 0.578 |
| 1449517_at   | glutaminyl-peptide cyclotransferase-like                            | Qpctl              | -1.1  | 0.301 | 1.32 | 0.050 | 1.1   | 0.771 | 1.09  | 0.053 | -1.13 | 0.010 |
| 1419460_at   | ribonuclease P 14 subunit (human)                                   | Rpp14              | 1.15  | 0.014 | 1.32 | 0.020 | 1.11  | 0.024 | 1.15  | 0.014 | 1.2   | 0.067 |
| 1423176_at   | transducer of ErbB-2.1                                              | Tob1               | 1.01  | 0.995 | 1.32 | 0.013 | 1.56  | 0.016 | 1.22  | 0.039 | 1.63  | 0.000 |
| 1417754_at   | topoisomerase I binding, arginine/serine-rich                       | Topors             | 1.12  | 0.043 | 1.32 | 0.006 | 1     | 0.983 | 1.15  | 0.147 | 1.23  | 0.141 |
| 1426971_at   | ubiquitin-activating enzyme E1-like                                 | Ube1l              | -1.4  | 0.318 | 1.32 | 0.049 | 1.06  | 0.472 | 1.61  | 0.848 | -1.07 | 0.544 |
| 1451244_a_at | zinc finger protein 422                                             | Zfp422             | 1.15  | 0.006 | 1.32 | 0.020 | 1.18  | 0.114 | 1.04  | 0.258 | 1.28  | 0.007 |
| 1438742_at   | zinc finger protein 629                                             | Zfp629             | 1.01  | 0.617 | 1.32 | 0.049 | 1.68  | 0.910 | 1.59  | 0.341 | 1.64  | 0.361 |
| 1426495_at   | RIKEN cDNA 2410042D21 gene                                          | 2410042D21Rik      | 1.1   | 0.410 | 1.31 | 0.011 | 1     | 0.749 | 1.01  | 0.807 | -1.02 | 0.825 |
| 1455914_at   | expressed sequence AI987944                                         | AI987944           | 1.2   | 0.468 | 1.31 | 0.038 | 1.08  | 0.969 | -1.08 | 0.558 | -1.02 | 0.769 |
| 1415760_s_at | ATX1 (antioxidant protein 1) homolog 1 (yeast)                      | Atox1              | 1.19  | 0.056 | 1.31 | 0.023 | 1.08  | 0.358 | 1.07  | 0.042 | 1.12  | 0.244 |
| 1437203_at   | Casitas B-lineage lymphoma-like 1                                   | Cbl1l              | 1.13  | 0.080 | 1.31 | 0.001 | 1.04  | 0.789 | 1.02  | 0.966 | 1.06  | 0.308 |
| 1416488_at   | cyclin G2                                                           | Ccng2              | -1    | 0.828 | 1.31 | 0.030 | 1.21  | 0.045 | 1.26  | 0.003 | 1.32  | 0.003 |
| 1419130_at   | deaminase domain containing 1                                       | Deadc1             | 1.1   | 0.701 | 1.31 | 0.003 | 1.05  | 0.410 | 1.17  | 0.232 | 1.27  | 0.169 |
| 1425062_at   | Fc receptor-like 1                                                  | Fcrl1              | 1.72  | 0.262 | 1.31 | 0.049 | 1.73  | 0.249 | 1.12  | 0.099 | 1.72  | 0.005 |
| 1454634_at   | fucokinase                                                          | Fuk                | 1.56  | 0.061 | 1.31 | 0.046 | -1.24 | 0.116 | 1.33  | 0.346 | 1.11  | 0.964 |
| 1436270_at   | gene model 740, (NCBI)                                              | Gm740              | 1.12  | 0.105 | 1.31 | 0.024 | 1.22  | 0.188 | 1.13  | 0.018 | 1.46  | 0.004 |
| 1417948_s_at | interleukin enhancer binding factor 2                               | Ilf2               | 1.13  | 0.157 | 1.31 | 0.018 | 1.18  | 0.054 | 1.05  | 0.161 | 1.25  | 0.008 |
| 1421903_at   | intersex-like (Drosophila)                                          | Ixl                | 1.3   | 0.143 | 1.31 | 0.046 | -1    | 0.950 | 1.1   | 0.417 | 1.28  | 0.041 |
| 1416503_at   | latexin                                                             | Lxn                | 1.12  | 0.056 | 1.31 | 0.015 | 1.14  | 0.197 | 1.16  | 0.043 | 1.28  | 0.014 |
| 1435127_a_at | O-sialoglycoprotein endopeptidase-like 1                            | Osgpl1             | 1.15  | 0.126 | 1.31 | 0.028 | 1.08  | 0.204 | 1.08  | 0.338 | 1.19  | 0.123 |
| 1445137_at   | PTK2 protein tyrosine kinase 2                                      | Ptk2               | 1.16  | 0.792 | 1.31 | 0.035 | 1.17  | 0.393 | -1.07 | 0.268 | -1.36 | 0.045 |
| 1416861_at   | signal transducing adaptor molecule (SH3 domain and ITAM            | Stam               | 1.05  | 0.425 | 1.31 | 0.029 | 1.06  | 0.575 | -1.03 | 0.266 | 1.02  | 0.704 |
| 1427915_s_at | transcription elongation factor B (SIII), polypeptide 1             | Tceb1              | 1.52  | 0.316 | 1.31 | 0.037 | 1.08  | 0.480 | 1.21  | 0.065 | -1.07 | 0.521 |
| 1448529_at   | thrombomodulin                                                      | Thbd               | 1.11  | 0.415 | 1.31 | 0.047 | 1.29  | 0.101 | 1.24  | 0.010 | 1.15  | 0.222 |
| 1423112_at   | ubiquitin-conjugating enzyme E2D 3 (UBC4/5 homolog, yeas            | Ube2d3             | 2.66  | 0.264 | 1.31 | 0.046 | -1.06 | 0.100 | -1.1  | 0.445 | 1     | 0.860 |
| 1422713_a_at | ubiquitin-conjugating enzyme E2I                                    | Ube2i              | 1.16  | 0.262 | 1.31 | 0.029 | 1.07  | 0.763 | 1.01  | 0.890 | 1.26  | 0.204 |
| 1448260_at   | ubiquitin carboxy-terminal hydrolase L1                             | Uchl1              | 1.29  | 0.106 | 1.31 | 0.005 | 1.15  | 0.218 | 1.06  | 0.012 | 1.19  | 0.150 |
| 1415689_s_at | zinc finger protein 306                                             | Zfp306             | 1.19  | 0.211 | 1.31 | 0.022 | 1.15  | 0.029 | 1.07  | 0.403 | 1.1   | 0.104 |
| 1454774_at   | zinc finger protein 445                                             | Zfp445             | 1.11  | 0.212 | 1.31 | 0.024 | 1.15  | 0.080 | 1.17  | 0.009 | 1.09  | 0.293 |

|              |                                                                        |                   |       |       |      |       |       |       |       |       |       |       |
|--------------|------------------------------------------------------------------------|-------------------|-------|-------|------|-------|-------|-------|-------|-------|-------|-------|
| 1447403_a_at | Zinc finger, MYND domain containing 19                                 | Zmynd19           | -1.1  | 0.476 | 1.31 | 0.040 | 1.12  | 0.443 | 1.35  | 0.015 | 1.26  | 0.034 |
| 1454031_at   | RIKEN cDNA 2310029O18 gene                                             | 2310029O18Rik     | -1.02 | 0.741 | 1.3  | 0.033 | -1.08 | 0.560 | -1.08 | 0.126 | 1.1   | 0.722 |
| 1453534_at   | RIKEN cDNA 2810004I08 gene                                             | 2810004I08Rik     | 1.17  | 0.507 | 1.3  | 0.028 | 1.39  | 0.038 | 1.42  | 0.567 | 1.15  | 0.843 |
| 1427334_s_at | RIKEN cDNA 2810474O19 gene                                             | 2810474O19Rik     | -1.01 | 0.911 | 1.3  | 0.004 | -1.01 | 0.856 | 1.17  | 0.158 | 1.37  | 0.102 |
| 1428540_at   | RIKEN cDNA 3321401G04 gene                                             | 3321401G04Rik     | 1.09  | 0.047 | 1.3  | 0.049 | -1.04 | 0.187 | 1.06  | 0.161 | 1.07  | 0.148 |
| 1432872_at   | RIKEN cDNA 4932702M13 gene                                             | 4932702M13Rik     | 2.09  | 0.259 | 1.3  | 0.044 | -1.15 | 0.331 | 1.18  | 0.510 | 1.19  | 0.113 |
| 1440478_at   | DNA segment, Chr 10, ERATO Doi 438, expressed                          | D10Erd438e        | 1.16  | 0.380 | 1.3  | 0.005 | 1.23  | 0.032 | 1.22  | 0.329 | -1.06 | 0.623 |
| 1418258_s_at | dynein light chain LC8-type 2                                          | Dynll2            | 1.03  | 0.583 | 1.3  | 0.011 | 1.14  | 0.335 | 1.19  | 0.133 | 1.18  | 0.028 |
| 1419805_s_at | geranylgeranyl diphosphate synthase 1                                  | Gggs1             | 1.19  | 0.019 | 1.3  | 0.022 | -1.04 | 0.231 | -1.05 | 0.280 | 1.12  | 0.435 |
| 1426284_at   | keratin 20                                                             | Krt20             | 1.21  | 0.030 | 1.3  | 0.005 | 1.25  | 0.035 | 1.07  | 0.145 | 1.23  | 0.123 |
| 1418435_at   | makorin, ring finger protein, 1                                        | Mkrm1             | 1.06  | 0.488 | 1.3  | 0.017 | 1.05  | 0.675 | -1.01 | 0.788 | 1.25  | 0.090 |
| 1433517_at   | myeloma overexpressed 2                                                | Myeov2            | 1.56  | 0.120 | 1.3  | 0.016 | 1.3   | 0.517 | 1.09  | 0.317 | -1.11 | 0.431 |
| 1448674_at   | ring finger protein 25                                                 | Rnf25             | 1.08  | 0.939 | 1.3  | 0.041 | 1.15  | 0.083 | 1.17  | 0.081 | 1.22  | 0.031 |
| 1444221_at   | TBC1D12: TBC1 domain family, member 12                                 | Tbc1d12           | 1.16  | 0.356 | 1.3  | 0.015 | 1.06  | 0.151 | -1.02 | 0.747 | -1.09 | 0.444 |
| 1448230_at   | ubiquitin specific peptidase 10                                        | Usp10             | 1.18  | 0.386 | 1.3  | 0.035 | 1.03  | 0.845 | 1.02  | 0.125 | 1.07  | 0.206 |
| 1435099_at   | UTP14, U3 small nucleolar ribonucleoprotein, homolog A (ye: Utp14a     |                   | -1.01 | 0.609 | 1.3  | 0.020 | 1.11  | 0.237 | 1.23  | 0.065 | 1.03  | 0.584 |
| 1455545_at   | RIKEN cDNA 1110065P20 gene                                             | 1110065P20Rik     | 1.08  | 0.440 | 1.29 | 0.006 | 1.03  | 0.675 | 1.19  | 0.000 | 1.25  | 0.003 |
| 1434923_at   | RIKEN cDNA 2810437L13 gene                                             | 2810437L13Rik     | 1.16  | 0.091 | 1.29 | 0.029 | 1.25  | 0.173 | 1.09  | 0.077 | 1.13  | 0.433 |
| 1441829_s_at | A kinase (PRKA) anchor protein 10                                      | Akap10            | 1.13  | 0.356 | 1.29 | 0.016 | -1.03 | 0.813 | 1.37  | 0.164 | -1.47 | 0.087 |
| 1422461_at   | ATPase family, AAA domain containing 3A                                | Atad3a            | 1.11  | 0.557 | 1.29 | 0.013 | 1.09  | 0.004 | 1.13  | 0.076 | 1.07  | 0.450 |
| 1439024_at   | BCL2-associated athanogene 4                                           | Bag4              | 1.15  | 0.183 | 1.29 | 0.026 | 1.06  | 0.509 | 1.36  | 0.090 | 1.26  | 0.548 |
| 1451702_at   | CKLF-like MARVEL transmembrane domain containing 7                     | Cmtm7             | -1.07 | 0.440 | 1.29 | 0.028 | 1     | 0.945 | 1.33  | 0.023 | 1.19  | 0.281 |
| 1452681_at   | deoxythymidylate kinase                                                | Dtymk             | 1.14  | 0.009 | 1.29 | 0.018 | 1.17  | 0.088 | 1.18  | 0.005 | 1.26  | 0.016 |
| 1452198_at   | F-box and leucine-rich repeat protein 10                               | Fbxl10            | 1.03  | 0.877 | 1.29 | 0.033 | 1.07  | 0.181 | 1.03  | 0.281 | 1.17  | 0.029 |
| 1448273_at   | glutathione synthetase                                                 | Gss               | 1.1   | 0.504 | 1.29 | 0.007 | 1.15  | 0.005 | 1.11  | 0.003 | 1.22  | 0.028 |
| 1416210_at   | IMP3, U3 small nucleolar ribonucleoprotein, homolog (yeast)            | Imp3              | 1.12  | 0.391 | 1.29 | 0.018 | 1.15  | 0.128 | 1.25  | 0.002 | 1.18  | 0.164 |
| 1417737_at   | mitochondrial ribosomal protein S31                                    | Mrps31            | 1.07  | 0.291 | 1.29 | 0.030 | -1.01 | 0.634 | 1.08  | 0.079 | -1.05 | 0.372 |
| 1448133_at   | NMD3 homolog (S. cerevisiae)                                           | Nmd3              | 1.06  | 0.561 | 1.29 | 0.006 | 1     | 0.983 | 1.11  | 0.015 | 1.09  | 0.490 |
| 1422488_at   | NTF2-related export protein 1                                          | Nxt1              | 1     | 0.969 | 1.29 | 0.020 | 1.11  | 0.019 | 1.2   | 0.042 | 1.1   | 0.390 |
| 1455394_at   | protein inhibitor of activated STAT 4                                  | Pias4             | 1.08  | 0.194 | 1.29 | 0.030 | 1.11  | 0.364 | 1.07  | 0.589 | 1.09  | 0.389 |
| 1417720_at   | polymerase (RNA) II (DNA directed) polypeptide J                       | Polr2j            | 1.17  | 0.050 | 1.29 | 0.020 | 1.13  | 0.236 | 1.03  | 0.581 | 1.11  | 0.281 |
| 1424136_a_at | peptidyl prolyl isomerase H /// similar to peptidyl prolyl isomer      | Pphl /// LOC4330f | 1.19  | 0.018 | 1.29 | 0.009 | 1.21  | 0.134 | 1.12  | 0.134 | 1.15  | 0.286 |
| 1426826_at   | RNA binding motif protein 16                                           | Rbm16             | 1.04  | 0.575 | 1.29 | 0.049 | -1.2  | 0.155 | -1.12 | 0.020 | -1.25 | 0.057 |
| 1415908_at   | testis-specific protein, Y-encoded-like 1                              | Tsply1            | -1.06 | 0.073 | 1.29 | 0.016 | 1.16  | 0.340 | -1.05 | 0.352 | 1.31  | 0.017 |
| 1452189_at   | WD repeat domain containing 82                                         | Wdr82             | 1     | 0.763 | 1.29 | 0.007 | 1.12  | 0.162 | 1.1   | 0.030 | 1.13  | 0.074 |
| 1435628_x_at | RIKEN cDNA 2610305J24 gene /// cDNA sequence BC0055: 2610305J24Rik /// |                   | 1.01  | 0.943 | 1.28 | 0.043 | 1.05  | 0.840 | 1.12  | 0.780 | 1.16  | 0.254 |
| 1455529_at   | RIKEN cDNA 2700083E18 gene                                             | 2700083E18Rik     | 1.04  | 0.254 | 1.28 | 0.015 | 1.08  | 0.082 | 1.15  | 0.004 | 1.28  | 0.013 |
| 1430656_a_at | asparagine synthetase domain containing 1                              | Asnsd1            | 1.19  | 0.308 | 1.28 | 0.044 | 1.15  | 0.045 | 1.11  | 0.012 | 1.04  | 0.252 |
| 1434791_at   | ATPase, H+ transporting, lysosomal V0 subunit A2                       | Atp6v0a2          | 1.28  | 0.049 | 1.28 | 0.035 | 1.03  | 0.606 | 1.25  | 0.138 | 1.08  | 0.490 |
| 1424940_s_at | cDNA sequence BC022687                                                 | BC022687          | 1.08  | 0.166 | 1.28 | 0.027 | 1.28  | 0.006 | 1.17  | 0.042 | 1.31  | 0.103 |
| 1449724_s_at | DNA segment, Chr 8, ERATO Doi 738, expressed                           | D8Erd738e         | 1.32  | 0.231 | 1.28 | 0.035 | -1.02 | 0.780 | 1.19  | 0.004 | 1.11  | 0.433 |
| 1431066_at   | fucosyltransferase 11                                                  | Fut11             | 1.23  | 0.034 | 1.28 | 0.018 | -1.04 | 0.828 | 1.43  | 0.059 | 1.37  | 0.263 |
| 1416522_a_at | gene rich cluster, C10 gene                                            | Grccl0            | 1.16  | 0.444 | 1.28 | 0.024 | -1    | 0.867 | 1.02  | 0.860 | 1.09  | 0.444 |
| 1426286_at   | nucleolar complex associated 3 homolog (S. cerevisiae)                 | Noc3l             | 1.04  | 0.571 | 1.28 | 0.042 | 1.07  | 0.683 | 1.01  | 0.755 | 1.03  | 0.591 |
| 1416730_at   | RNA terminal phosphate cyclase-like 1                                  | Rcl1              | 1.03  | 0.684 | 1.28 | 0.010 | 1.06  | 0.844 | 1.06  | 0.376 | 1.08  | 0.171 |
| 1428227_at   | RE1-silencing transcription factor                                     | Rest              | 1.17  | 0.347 | 1.28 | 0.037 | 1.06  | 0.509 | 1.03  | 0.742 | -1.01 | 0.722 |
| 1426494_at   | RNA (guanine-9-) methyltransferase domain containing 3                 | Rg9mtd3           | 1.11  | 0.207 | 1.28 | 0.043 | 1.13  | 0.416 | 1.02  | 0.843 | 1.05  | 0.544 |
| 1455142_at   | suppressor of cytokine signaling 4                                     | Socs4             | 1.04  | 0.672 | 1.28 | 0.014 | 1.14  | 0.001 | 1.16  | 0.061 | 1.17  | 0.098 |
| 1428660_s_at | torsin family 3, member A                                              | Tor3a             | -1.04 | 0.634 | 1.28 | 0.003 | 1.13  | 0.294 | 1.24  | 0.013 | 1.17  | 0.419 |
| 1423962_at   | WD repeat domain 26                                                    | Wdr26             | 1.23  | 0.054 | 1.28 | 0.041 | 1.01  | 0.828 | 1.1   | 0.375 | -1.05 | 0.375 |
| 1424524_at   | RIKEN cDNA 1200002N14 gene                                             | 1200002N14Rik     | 1.05  | 0.761 | 1.27 | 0.014 | 1.28  | 0.060 | 1.12  | 0.140 | 1.24  | 0.114 |
| 1428550_at   | RIKEN cDNA 1810015A11 gene                                             | 1810015A11Rik     | 1.06  | 0.364 | 1.27 | 0.025 | 1.34  | 0.004 | 1.43  | 0.017 | 1.41  | 0.040 |
| 1423767_at   | RIKEN cDNA 2810410M20 gene                                             | 2810410M20Rik     | 1.08  | 0.145 | 1.27 | 0.007 | 1.16  | 0.056 | 1.06  | 0.162 | 1.21  | 0.018 |
| 1456141_x_at | BRCA1/BRCA2-containing complex, subunit 3                              | Brcs3             | -1.07 | 0.619 | 1.27 | 0.013 | -1.24 | 0.196 | 1.32  | 0.209 | -1.02 | 0.929 |
| 1416019_at   | down-regulator of transcription 1                                      | Dr1               | 1.01  | 0.987 | 1.27 | 0.015 | 1.24  | 0.259 | 1.27  | 0.012 | 1.12  | 0.393 |
| 1437284_at   | frizzled homolog 1 (Drosophila)                                        | Fzd1              | 1.03  | 0.393 | 1.27 | 0.017 | 1.34  | 0.060 | 1.23  | 0.012 | 1.39  | 0.042 |
| 1450135_at   | frizzled homolog 3 (Drosophila)                                        | Fzd3              | 1.05  | 0.975 | 1.27 | 0.038 | 1.22  | 0.267 | -1.07 | 0.480 | 1.13  | 0.958 |
| 1438660_at   | glucosaminyl (N-acetyl) transferase 2, I-branching enzyme              | Gcnt2             | -1    | 0.763 | 1.27 | 0.035 | 1.18  | 0.316 | -1.02 | 0.554 | 1.08  | 0.314 |

|              |                                                                                    |               |       |       |      |       |       |       |       |       |       |       |
|--------------|------------------------------------------------------------------------------------|---------------|-------|-------|------|-------|-------|-------|-------|-------|-------|-------|
| 1415800_at   | gap junction membrane channel protein alpha 1                                      | Gja1          | 1.08  | 0.202 | 1.27 | 0.042 | 1.22  | 0.297 | 1.04  | 0.154 | 1.16  | 0.046 |
| 1460495_s_at | Htra serine peptidase 2                                                            | Htra2         | 1.39  | 0.215 | 1.27 | 0.046 | 1.02  | 0.939 | 1.08  | 0.202 | 1.13  | 0.200 |
| 1417079_s_at | lectin, galactose-binding, soluble 2                                               | Lgals2        | 1.05  | 0.874 | 1.27 | 0.021 | 1.01  | 0.875 | 1.04  | 0.690 | 2.27  | 0.101 |
| 1424377_at   | similar to ribosomal protein L24-like                                              | LOC670726     | 1.11  | 0.150 | 1.27 | 0.009 | 1.11  | 0.534 | 1.14  | 0.013 | 1.23  | 0.082 |
| 1456118_at   | methyltransferase like 2                                                           | Mettl2        | -1.05 | 0.412 | 1.27 | 0.006 | 1.09  | 0.349 | 1.05  | 0.829 | 1.11  | 0.193 |
| 1450880_at   | mitochondrial ribosomal protein L16                                                | Mrpl16        | 1.09  | 0.531 | 1.27 | 0.046 | -1    | 0.907 | 1.08  | 0.142 | 1.1   | 0.106 |
| 1415690_at   | mitochondrial ribosomal protein L27                                                | Mrpl27        | 1.21  | 0.183 | 1.27 | 0.039 | 1.04  | 0.631 | 1.06  | 0.146 | 1.07  | 0.186 |
| 1416931_at   | Ngg1 interacting factor 3-like 1 (S. pombe)                                        | Nif3l1        | 1.05  | 0.348 | 1.27 | 0.015 | 1.1   | 0.208 | 1.12  | 0.108 | 1.2   | 0.061 |
| 1448480_at   | nuclear import 7 homolog (S. cerevisiae)                                           | Nip7          | 1.04  | 0.912 | 1.27 | 0.003 | 1.08  | 0.279 | 1.1   | 0.077 | 1.08  | 0.076 |
| 1428892_at   | peptidylprolyl isomerase (cyclophilin)-like 1                                      | Ppil1         | 1.1   | 0.453 | 1.27 | 0.027 | 1.03  | 0.776 | 1.21  | 0.027 | 1.05  | 0.063 |
| 1416292_at   | peroxiredoxin 3                                                                    | Prdx3         | 1.24  | 0.240 | 1.27 | 0.045 | 1.05  | 0.744 | 1.1   | 0.035 | 1.04  | 0.179 |
| 1418859_at   | regulatory factor X-associated protein                                             | Rfxap         | 1.01  | 0.612 | 1.27 | 0.032 | 1.05  | 0.637 | 1.2   | 0.000 | 1.08  | 0.201 |
| 1419369_at   | ring finger protein 138                                                            | Rnf138        | 1.17  | 0.247 | 1.27 | 0.021 | 1.18  | 0.325 | 1.15  | 0.076 | 1.21  | 0.110 |
| 1424873_at   | ring finger protein 2                                                              | Rnf2          | 1.11  | 0.000 | 1.27 | 0.012 | 1.14  | 0.002 | 1.04  | 0.295 | 1.06  | 0.095 |
| 1423666_s_at | ribosomal protein L5 /// similar to 60S ribosomal protein L5 /// Rpl5 /// LOC38274 | Rpl5          | -1.1  | 0.256 | 1.27 | 0.032 | 1.21  | 0.047 | 1.38  | 0.002 | 1.31  | 0.063 |
| 1455027_at   | RUN and FYVE domain containing 3                                                   | Rufy3         | 1.01  | 0.830 | 1.27 | 0.037 | -1.18 | 0.319 | 1.07  | 0.607 | -1.09 | 0.554 |
| 1422676_at   | SWI/SNF related, matrix associated, actin dependent regulator of transcription 1   | Smardc1       | 1.04  | 0.501 | 1.27 | 0.002 | 1.18  | 0.048 | 1.14  | 0.035 | 1.21  | 0.013 |
| 1441435_at   | Transducin (beta)-like 1 X-linked                                                  | Tb11x         | 1.17  | 0.374 | 1.27 | 0.004 | 1.31  | 0.337 | 1.24  | 0.398 | 1.09  | 0.925 |
| 1449621_s_at | thrombospondin, type I, domain 1                                                   | Thsd1         | -1.04 | 0.595 | 1.27 | 0.021 | 1.14  | 0.218 | 1.05  | 0.746 | 1.13  | 0.232 |
| 1427114_at   | tetratricopeptide repeat domain 19                                                 | Ttc19         | -1.02 | 0.597 | 1.27 | 0.016 | 1.01  | 0.901 | 1.1   | 0.033 | 1.04  | 0.557 |
| 1419179_at   | thioredoxin-like 4                                                                 | Txn14         | 1.07  | 0.681 | 1.27 | 0.027 | 1.04  | 0.867 | 1.2   | 0.140 | 1.18  | 0.006 |
| 1417983_a_at | ubiquitin-conjugating enzyme E2 variant 2                                          | Ube2v2        | 1.18  | 0.124 | 1.27 | 0.024 | 1.04  | 0.532 | 1.05  | 0.692 | 1.01  | 0.882 |
| 1435114_at   | WD repeat and HMG-box DNA binding protein 1                                        | Wdhd1         | 1.06  | 0.573 | 1.27 | 0.001 | 1.04  | 0.376 | 1.29  | 0.105 | 1.03  | 0.496 |
| 1415941_s_at | zinc finger, AN1-type domain 2A                                                    | Zfand2a       | 1.09  | 0.339 | 1.27 | 0.009 | 1.07  | 0.309 | 1.01  | 0.769 | 1.19  | 0.049 |
| 1418048_at   | RIKEN cDNA 1110059G10 gene                                                         | 1110059G10Rik | 1.04  | 0.651 | 1.26 | 0.030 | 1.12  | 0.060 | 1.17  | 0.153 | 1.12  | 0.091 |
| 1430872_at   | RIKEN cDNA 4930412O13 gene                                                         | 4930412O13Rik | 1.18  | 0.435 | 1.26 | 0.045 | 1.42  | 0.678 | 1.78  | 0.141 | 1.07  | 0.834 |
| 1433649_at   | amine oxidase, flavin containing 1                                                 | Aof1          | 1.05  | 0.807 | 1.26 | 0.009 | 1.49  | 0.071 | 1.1   | 0.288 | 1.18  | 0.224 |
| 1415719_s_at | armadillo repeat containing 1                                                      | Armc1         | 1.27  | 0.091 | 1.26 | 0.016 | 1     | 0.826 | -1.01 | 0.883 | 1.01  | 0.898 |
| 1440881_at   | bromodomain and WD repeat domain containing 3                                      | Brwd3         | 1.45  | 0.176 | 1.26 | 0.014 | -1.02 | 0.642 | -1.12 | 0.348 | -1.02 | 0.821 |
| 1417842_at   | calcium modulating ligand                                                          | Cam1          | -1.03 | 0.572 | 1.26 | 0.043 | 1.16  | 0.066 | 1.19  | 0.002 | 1.17  | 0.014 |
| 1416873_a_at | cyclin-dependent kinase 2                                                          | Cdk2          | 1.13  | 0.194 | 1.26 | 0.002 | 1.16  | 0.221 | 1.24  | 0.041 | 1.13  | 0.214 |
| 1429101_at   | gap junction membrane channel protein alpha 5                                      | Gja5          | -1.26 | 0.114 | 1.26 | 0.033 | 1.03  | 0.754 | -1.27 | 0.120 | 1.02  | 0.790 |
| 1433528_at   | general transcription factor II A, 2                                               | Gtf2a2        | 1.25  | 0.093 | 1.26 | 0.008 | 1.12  | 0.260 | 1.08  | 0.299 | 1.05  | 0.788 |
| 1434936_at   | HIRA interacting protein 3                                                         | Hirip3        | 1.11  | 0.166 | 1.26 | 0.025 | 1.26  | 0.113 | 1.18  | 0.126 | 1.16  | 0.214 |
| 1448871_at   | mitogen activated protein kinase 13                                                | Mapk13        | 1.28  | 0.309 | 1.26 | 0.033 | 1.09  | 0.530 | -1.06 | 0.374 | 1.32  | 0.198 |
| 1448849_at   | mitochondrial ribosomal protein L40                                                | Mrpl40        | 1.17  | 0.203 | 1.26 | 0.030 | -1.06 | 0.420 | 1.1   | 0.247 | 1.12  | 0.328 |
| 1422554_at   | necdin-like 2                                                                      | Ndn12         | 1.05  | 0.432 | 1.26 | 0.027 | 1.13  | 0.238 | 1.15  | 0.043 | 1.14  | 0.177 |
| 1428080_at   | phosphoglycerate mutase family member 5                                            | Pgam5         | 1.08  | 0.783 | 1.26 | 0.023 | 1.07  | 0.384 | 1.13  | 0.033 | 1.23  | 0.037 |
| 1416174_at   | retinoblastoma binding protein 9                                                   | Rbbp9         | 1.28  | 0.283 | 1.26 | 0.045 | 1.14  | 0.275 | 1.25  | 0.085 | 1.03  | 0.938 |
| 1416177_at   | RNA binding motif protein, X chromosome retrogene                                  | Rbmxt         | 1.01  | 0.994 | 1.26 | 0.022 | 1.11  | 0.090 | 1.06  | 0.097 | 1.12  | 0.057 |
| 1422418_s_at | suppressor of Ty 4 homolog 1 (S. cerevisiae) /// suppressor of Supt4h1 /// Supt4f  | Supt4h1       | 1.26  | 0.265 | 1.26 | 0.031 | 1.08  | 0.218 | 1.07  | 0.106 | 1.04  | 0.516 |
| 1428263_a_at | transcription elongation factor B (SIII), polypeptide 2                            | Tceb2         | 1.16  | 0.315 | 1.26 | 0.005 | 1.02  | 0.673 | 1.07  | 0.157 | 1.07  | 0.199 |
| 1448882_at   | transmembrane protein 93                                                           | Tmem93        | 1.03  | 0.298 | 1.26 | 0.011 | 1.13  | 0.022 | 1.16  | 0.014 | 1.2   | 0.012 |
| 1428346_at   | TRAF type zinc finger domain containing 1                                          | Traf1         | -1.08 | 0.116 | 1.26 | 0.017 | 1.29  | 0.063 | 1.06  | 0.075 | 1.25  | 0.064 |
| 1448179_at   | upregulated during skeletal muscle growth 5                                        | Usmg5         | 1.02  | 0.986 | 1.26 | 0.003 | 1.17  | 0.353 | 1.15  | 0.088 | -1.01 | 0.516 |
| 1436675_at   | WD repeat domain 63                                                                | Wdr63         | 1.29  | 0.756 | 1.26 | 0.048 | 2.53  | 0.022 | 1.09  | 0.548 | 1.01  | 0.987 |
| 1420702_at   | RIKEN cDNA 1700093K21 gene                                                         | 1700093K21Rik | 1.11  | 0.490 | 1.25 | 0.037 | 1.26  | 0.145 | 1.02  | 0.954 | -1.09 | 0.329 |
| 1428966_at   | RIKEN cDNA 2610204K14 gene                                                         | 2610204K14Rik | 1.08  | 0.332 | 1.25 | 0.035 | 1.07  | 0.044 | 1.15  | 0.051 | 1.06  | 0.327 |
| 1435018_at   | RIKEN cDNA 5930434B04 gene                                                         | 5930434B04Rik | 1.06  | 0.501 | 1.25 | 0.040 | 1.18  | 0.140 | 1.13  | 0.087 | 1.09  | 0.223 |
| 1435584_at   | expressed sequence Al662791                                                        | Al662791      | 1.29  | 0.255 | 1.25 | 0.001 | 1     | 0.964 | -1.14 | 0.370 | -1.07 | 0.738 |
| 1424026_s_at | cDNA sequence BC013529                                                             | BC013529      | 1.18  | 0.225 | 1.25 | 0.036 | -1.01 | 0.840 | 1.04  | 0.611 | 1.12  | 0.010 |
| 1451400_at   | cDNA sequence BC023488                                                             | BC023488      | 1.26  | 0.223 | 1.25 | 0.028 | 1.12  | 0.327 | 1.21  | 0.204 | 1.34  | 0.067 |
| 1416140_a_at | DEAH (Asp-Glu-Ala-His) box polypeptide 30                                          | Dhx30         | -1.13 | 0.387 | 1.25 | 0.008 | 1.13  | 0.218 | 1.1   | 0.031 | 1.17  | 0.026 |
| 1452012_a_at | exosome component 1                                                                | Exosc1        | 1.14  | 0.312 | 1.25 | 0.029 | 1.1   | 0.023 | 1.13  | 0.243 | 1.16  | 0.238 |
| 1433489_s_at | fibroblast growth factor receptor 2                                                | Fgfr2         | 1.14  | 0.577 | 1.25 | 0.001 | 1.39  | 0.029 | 1.02  | 0.886 | 1.05  | 0.964 |
| 1430038_at   | gephyrin                                                                           | Gphn          | 1.02  | 0.888 | 1.25 | 0.024 | 1.11  | 0.465 | 1.23  | 0.406 | 1.54  | 0.046 |
| 1416323_at   | potassium channel tetramerisation domain containing 20                             | Kctd20        | 1.08  | 0.460 | 1.25 | 0.001 | 1.08  | 0.452 | 1.14  | 0.085 | 1.12  | 0.063 |
| 1426913_at   | lanosterol synthase                                                                | Lss           | 1.58  | 0.111 | 1.25 | 0.010 | -1.04 | 0.613 | 1.1   | 0.026 | -1.03 | 0.520 |

|              |                                                                   |                  |       |       |      |       |       |       |       |       |       |       |
|--------------|-------------------------------------------------------------------|------------------|-------|-------|------|-------|-------|-------|-------|-------|-------|-------|
| 1418244_at   | N-acetyltransferase 5 (ARD1 homolog, <i>S. cerevisiae</i> )       | Nat5             | 1.08  | 0.175 | 1.25 | 0.021 | 1.04  | 0.306 | 1.02  | 0.587 | 1.06  | 0.189 |
| 1448896_at   | phosphatidylinositol glycan anchor biosynthesis, class F          | Pigf             | 1.11  | 0.051 | 1.25 | 0.002 | 1.13  | 0.007 | 1.07  | 0.162 | 1.14  | 0.025 |
| 1415695_at   | proteasome (prosome, macropain) subunit, alpha type 1             | Pisma1           | 1.06  | 0.170 | 1.25 | 0.008 | 1.08  | 0.167 | 1.05  | 0.519 | 1.08  | 0.092 |
| 1424705_at   | RNA binding motif protein, X-linked 2                             | RbmX2            | 1.21  | 0.158 | 1.25 | 0.004 | 1.03  | 0.853 | 1.12  | 0.272 | 1.16  | 0.119 |
| 1426386_at   | ribosomal protein L7-like 1                                       | Rp171            | 1.18  | 0.244 | 1.25 | 0.050 | 1     | 0.964 | 1.11  | 0.213 | 1.09  | 0.064 |
| 1417539_at   | solute carrier family 35 (CMP-sialic acid transporter), membe     | Slc35a1          | 1.05  | 0.917 | 1.25 | 0.048 | 1.05  | 0.277 | 1.05  | 0.098 | 1.26  | 0.062 |
| 1434712_at   | Smith-Magenis syndrome chromosome region, candidate 7-li          | Smcr71           | 1.09  | 0.591 | 1.25 | 0.034 | 1.16  | 0.447 | 1.08  | 0.101 | 1.1   | 0.253 |
| 1418568_x_at | signal recognition particle 14                                    | Srp14            | 1.13  | 0.350 | 1.25 | 0.031 | 1.12  | 0.052 | 1.08  | 0.062 | 1.07  | 0.290 |
| 1422469_at   | TANK-binding kinase 1                                             | Tbk1             | 1.23  | 0.073 | 1.25 | 0.042 | 1.13  | 0.366 | 1.1   | 0.170 | -1.07 | 0.405 |
| 1454676_s_at | toll-like receptor adaptor molecule 1                             | Ticam1           | -1.06 | 0.522 | 1.25 | 0.021 | 1.13  | 0.273 | 1.2   | 0.302 | 1.16  | 0.154 |
| 1448999_at   | trafficking protein particle complex 5                            | Trappc5          | 1     | 0.895 | 1.25 | 0.041 | 1.1   | 0.470 | 1.11  | 0.091 | 1.24  | 0.059 |
| 1423575_a_at | Williams Beuren syndrome chromosome region 22                     | Wbscr22          | 1.2   | 0.142 | 1.25 | 0.029 | -1.01 | 0.524 | 1.17  | 0.071 | 1.06  | 0.437 |
| 1428678_s_at | WD repeat domain 73                                               | Wdr73            | -1.01 | 0.808 | 1.25 | 0.047 | 1.24  | 0.016 | 1.2   | 0.055 | 1.22  | 0.024 |
| 1428843_at   | membrane-associated ring finger (C3HC4) 5                         | 5-Mar            | 1.03  | 0.418 | 1.24 | 0.010 | -1.01 | 0.771 | 1.07  | 0.161 | 1.09  | 0.064 |
| 1428679_s_at | RIKEN cDNA 0610010K14 gene                                        | 0610010K14Rik    | 1.18  | 0.340 | 1.24 | 0.003 | 1.09  | 0.385 | 1.03  | 0.772 | 1.2   | 0.039 |
| 1451220_at   | RIKEN cDNA 2310040A13 gene                                        | 2310040A13Rik    | 1.14  | 0.198 | 1.24 | 0.003 | -1.07 | 0.060 | -1.13 | 0.037 | -1.16 | 0.045 |
| 1417062_at   | RIKEN cDNA 2810037C14 gene                                        | 2810037C14Rik    | 1.16  | 0.188 | 1.24 | 0.045 | 1.18  | 0.074 | 1.15  | 0.006 | 1.13  | 0.180 |
| 1434625_at   | RIKEN cDNA 4930432O21 gene                                        | 4930432O21Rik    | 1.26  | 0.173 | 1.24 | 0.027 | 1.06  | 0.520 | -1.05 | 0.426 | 1.11  | 0.814 |
| 1449933_a_at | RIKEN cDNA 5730449L18 gene                                        | 5730449L18Rik    | 1.19  | 0.054 | 1.24 | 0.041 | 1.18  | 0.031 | 1.04  | 0.705 | 1.03  | 0.679 |
| 1429665_at   | RIKEN cDNA 6230416J20 gene                                        | 6230416J20Rik    | 1.3   | 0.031 | 1.24 | 0.021 | 1.26  | 0.022 | 1.26  | 0.408 | 1.03  | 0.621 |
| 1424075_at   | RIKEN cDNA 9430016H08 gene                                        | 9430016H08Rik    | 1.08  | 0.164 | 1.24 | 0.038 | -1.01 | 0.763 | 1.04  | 0.474 | 1.17  | 0.087 |
| 1417112_at   | ADP-ribosylation factor-like 2 binding protein                    | Arl2bp           | 1.11  | 0.281 | 1.24 | 0.023 | 1.15  | 0.061 | 1.09  | 0.289 | 1.16  | 0.003 |
| 1435488_at   | RIKEN cDNA C630010D07 gene /// similar to methylenetetra          | C630010D07Rik /  | -1.03 | 0.730 | 1.24 | 0.024 | 1.26  | 0.091 | 1.21  | 0.136 | 1.35  | 0.019 |
| 1417233_at   | coiled-coil-helix-coiled-coil-helix domain containing 4           | Chchd4           | -1.03 | 0.024 | 1.24 | 0.015 | 1.14  | 0.170 | 1.17  | 0.018 | 1.18  | 0.037 |
| 1435505_at   | dystrophia myotonica-containing WD repeat motif                   | Dmwd             | 1.14  | 0.095 | 1.24 | 0.000 | -1.04 | 0.555 | 1.02  | 0.427 | 1.06  | 0.567 |
| 1436070_at   | glyoxalase 1                                                      | Glo1             | 1.17  | 0.100 | 1.24 | 0.002 | 1.11  | 0.212 | 1.12  | 0.272 | 1.29  | 0.171 |
| 1418260_at   | hormonally upregulated Neu-associated kinase /// similar to h     | Hunk /// LOC6305 | -1.1  | 0.709 | 1.24 | 0.010 | 1.07  | 0.897 | -1.02 | 0.789 | -1.42 | 0.052 |
| 1423873_at   | LSM1 homolog, U6 small nuclear RNA associated ( <i>S. cerevis</i> | Lsm1             | 1.16  | 0.107 | 1.24 | 0.041 | 1.17  | 0.184 | 1.11  | 0.018 | 1.07  | 0.359 |
| 1431939_a_at | myc induced nuclear antigen                                       | Mina             | 1.16  | 0.659 | 1.24 | 0.037 | -1.03 | 0.751 | 1.03  | 0.978 | 1.04  | 0.804 |
| 1417371_at   | pellino 1                                                         | Pel1             | 1.03  | 0.418 | 1.24 | 0.016 | 1.04  | 0.370 | 1.09  | 0.002 | 1.16  | 0.007 |
| 1448492_a_at | proteasome (prosome, macropain) 26S subunit, non-ATPase           | Psmd12           | 1.06  | 0.387 | 1.24 | 0.027 | -1    | 0.953 | 1.02  | 0.378 | 1.09  | 0.442 |
| 1436101_at   | ring finger protein 24                                            | Rnf24            | 1.05  | 0.215 | 1.24 | 0.032 | 1.16  | 0.172 | 1.12  | 0.210 | 1.1   | 0.121 |
| 1423654_a_at | ring finger protein 4                                             | Rnf4             | 1.11  | 0.311 | 1.24 | 0.041 | 1.05  | 0.168 | 1     | 0.983 | 1.06  | 0.199 |
| 1434867_at   | solute carrier family 4, sodium bicarbonate transporter-like, m   | Slc4a11          | 1.06  | 0.470 | 1.24 | 0.009 | -1.09 | 0.430 | -1.08 | 0.414 | -1    | 0.868 |
| 1424337_at   | sorting nexin 15                                                  | Snx15            | 1.03  | 0.837 | 1.24 | 0.008 | 1.18  | 0.182 | 1.11  | 0.540 | 1.14  | 0.040 |
| 1448774_at   | stomatin (Epb7.2)-like 2                                          | Stoml2           | 1.22  | 0.322 | 1.24 | 0.026 | 1.05  | 0.511 | 1.02  | 0.498 | 1.09  | 0.055 |
| 1416889_at   | troponin I, skeletal, fast 2                                      | Tnni2            | 1.1   | 0.982 | 1.24 | 0.014 | 1.22  | 0.329 | 1.12  | 0.887 | -1.12 | 0.380 |
| 1423360_at   | YME1-like 1 ( <i>S. cerevisiae</i> )                              | Yme11            | 1.11  | 0.394 | 1.24 | 0.018 | 1.01  | 0.947 | 1.14  | 0.899 | -1.04 | 0.606 |
| 1428348_at   | zinc finger protein 336                                           | Zfp336           | 1.11  | 0.270 | 1.24 | 0.043 | 1.11  | 0.059 | -1    | 0.892 | 1.18  | 0.033 |
| 1428256_at   | RIKEN cDNA 2310047H23 gene                                        | 2310047H23Rik    | 1.17  | 0.079 | 1.23 | 0.049 | 1.05  | 0.664 | 1.07  | 0.300 | 1.14  | 0.196 |
| 1430515_s_at | aminoadipate-semialdehyde dehydrogenase-phosphopantett            | Aasdhppt         | 1.09  | 0.362 | 1.23 | 0.024 | 1.13  | 0.007 | 1.12  | 0.005 | 1.2   | 0.083 |
| 1424804_at   | cDNA sequence BC020002                                            | BC020002         | 1.12  | 0.268 | 1.23 | 0.035 | 1.08  | 0.119 | 1.18  | 0.020 | 1.1   | 0.523 |
| 1428773_s_at | Bcl6 interacting corepressor                                      | Bcor             | -1.03 | 0.682 | 1.23 | 0.047 | 1.01  | 0.611 | -1.02 | 0.050 | 1.02  | 0.871 |
| 1441989_at   | BCL2/adenovirus E1B interacting protein 1, NIP2                   | Bnip2            | -1.07 | 0.612 | 1.23 | 0.003 | 1.23  | 0.018 | 1.18  | 0.382 | -1.09 | 0.704 |
| 1423447_at   | caseinolytic peptidase X ( <i>E. coli</i> )                       | Clpx             | 1.18  | 0.152 | 1.23 | 0.005 | 1.04  | 0.947 | 1.04  | 0.870 | -1.03 | 0.602 |
| 1417103_at   | D-dopachrome tautomerase                                          | Ddt              | 1.15  | 0.189 | 1.23 | 0.016 | 1.12  | 0.487 | 1.09  | 0.111 | 1.01  | 0.792 |
| 1451076_s_at | dendritic cell protein GA17                                       | Ga17             | 1.2   | 0.163 | 1.23 | 0.017 | 1.11  | 0.082 | 1.06  | 0.216 | 1.03  | 0.496 |
| 1442135_at   | Gene model 237, (NCBI)                                            | Gm237            | 1.05  | 0.510 | 1.23 | 0.036 | 1.18  | 0.176 | 1.3   | 0.059 | 1.35  | 0.027 |
| 1451135_at   | general transcription factor IIB                                  | Gtf2b            | 1.05  | 0.044 | 1.23 | 0.008 | 1.06  | 0.178 | 1.11  | 0.053 | 1.08  | 0.201 |
| 1428406_s_at | host cell factor C1 regulator 1 (XPO1-dependent)                  | Hcfc1r1          | 1.1   | 0.472 | 1.23 | 0.044 | 1.09  | 0.425 | 1.06  | 0.112 | 1.02  | 0.891 |
| 1438320_s_at | minichromosome maintenance deficient 7 ( <i>S. cerevisiae</i> )   | Mcm7             | -1    | 0.899 | 1.23 | 0.022 | 1.17  | 0.002 | 1.09  | 0.033 | 1.15  | 0.010 |
| 1419290_at   | methyltransferase like 6                                          | Mettl6           | 1.05  | 0.403 | 1.23 | 0.018 | 1.06  | 0.292 | 1.07  | 0.258 | 1.15  | 0.030 |
| 1419471_a_at | nuclear distribution gene C homolog ( <i>Aspergillus</i> )        | Nudc             | 1.03  | 0.942 | 1.23 | 0.027 | 1.02  | 0.980 | -1.01 | 0.651 | 1.03  | 0.542 |
| 1423460_at   | PERQ amino acid rich, with GYF domain 1                           | Perq1            | -1.13 | 0.354 | 1.23 | 0.045 | 1.06  | 0.563 | -1.01 | 0.796 | 1.23  | 0.234 |
| 1426965_at   | RAS related protein 2a                                            | Rap2a            | -1.03 | 0.529 | 1.23 | 0.019 | 1.22  | 0.040 | 1.17  | 0.048 | 1.38  | 0.008 |
| 1428766_at   | RNA methyltransferase like 1                                      | Rnmt1            | 1.03  | 0.383 | 1.23 | 0.018 | 1.17  | 0.150 | 1.24  | 0.002 | 1.32  | 0.004 |
| 1453928_a_at | Sjogren syndrome antigen B                                        | Ssb              | 1.14  | 0.216 | 1.23 | 0.050 | 1.14  | 0.214 | 1.16  | 0.124 | -1.08 | 0.488 |
| 1448643_at   | Sjogren's syndrome nuclear autoantigen 1                          | Ssna1            | 1.09  | 0.283 | 1.23 | 0.049 | 1.1   | 0.169 | 1.14  | 0.052 | 1.13  | 0.073 |

|              |                                                                                       |               |       |       |      |       |       |       |       |       |       |       |
|--------------|---------------------------------------------------------------------------------------|---------------|-------|-------|------|-------|-------|-------|-------|-------|-------|-------|
| 1422591_at   | transcription elongation factor B (SIII), polypeptide 3                               | Tceb3         | 1.1   | 0.365 | 1.23 | 0.037 | 1.04  | 0.315 | 1.07  | 0.248 | 1.07  | 0.309 |
| 1424068_at   | T-cell leukemia translocation altered gene                                            | Tcta          | 1.1   | 0.224 | 1.23 | 0.018 | 1.09  | 0.546 | 1.2   | 0.181 | 1.17  | 0.041 |
| 1416628_at   | RIKEN cDNA 0610006108 gene                                                            | 0610006108Rik | 1.07  | 0.381 | 1.22 | 0.002 | 1.11  | 0.444 | 1.16  | 0.109 | 1.16  | 0.016 |
| 1417886_at   | RIKEN cDNA 1810009A15 gene                                                            | 1810009A15Rik | 1.16  | 0.095 | 1.22 | 0.044 | 1.11  | 0.017 | 1.11  | 0.140 | 1.16  | 0.128 |
| 1418662_at   | RIKEN cDNA 2210012G02 gene                                                            | 2210012G02Rik | 1.31  | 0.419 | 1.22 | 0.001 | -1.02 | 0.460 | -1.03 | 0.643 | -1.02 | 0.755 |
| 1423823_at   | RIKEN cDNA 2610012O22 gene                                                            | 2610012O22Rik | 1.01  | 0.747 | 1.22 | 0.005 | 1.2   | 0.049 | 1.12  | 0.030 | 1.14  | 0.184 |
| 1426797_at   | RIKEN cDNA 2700094F01 gene                                                            | 2700094F01Rik | 1.13  | 0.008 | 1.22 | 0.012 | 1.07  | 0.543 | 1.06  | 0.542 | 1.15  | 0.046 |
| 1457705_at   | RIKEN cDNA 5330421C15 gene                                                            | 5330421C15Rik | 1.41  | 0.729 | 1.22 | 0.028 | 1.13  | 0.647 | -1.98 | 0.064 | -1.32 | 0.328 |
| 1423801_a_at | adenine phosphoribosyl transferase                                                    | Aprt          | 1.13  | 0.127 | 1.22 | 0.032 | 1.13  | 0.300 | 1.08  | 0.105 | 1.17  | 0.160 |
| 1416143_at   | ATP synthase, H+ transporting, mitochondrial F0 complex, subunit 5                    | Atp5j         | 1.21  | 0.028 | 1.22 | 0.020 | 1.07  | 0.141 | 1.08  | 0.033 | 1.03  | 0.304 |
| 1426234_s_at | cDNA sequence BC002199                                                                | BC002199      | -1.02 | 0.591 | 1.22 | 0.035 | 1.13  | 0.032 | 1.19  | 0.007 | 1.11  | 0.287 |
| 1425687_at   | CASP8 and FADD-like apoptosis regulator                                               | Cflar         | 1.09  | 0.405 | 1.22 | 0.044 | -1.01 | 0.757 | 1.1   | 0.691 | 1.36  | 0.095 |
| 1425591_a_at | chromatin modifying protein 2A                                                        | Chmp2a        | 1.12  | 0.531 | 1.22 | 0.020 | -1.02 | 0.783 | 1.04  | 0.243 | -1    | 0.794 |
| 1417564_at   | cofactor required for Sp1 transcriptional activation, subunit 9                       | Crsp9         | -1    | 0.853 | 1.22 | 0.008 | 1.17  | 0.114 | 1.19  | 0.007 | 1.1   | 0.018 |
| 1427194_s_at | excision repair-cross-complementing rodent repair deficiency, complementation group 1 | Csra          | -1.01 | 0.873 | 1.22 | 0.041 | -1.07 | 0.517 | -1.06 | 0.577 | -1.02 | 0.806 |
| 1452052_s_at | eukaryotic translation initiation factor 3, subunit 1 alpha                           | Eif3s1        | 1.12  | 0.016 | 1.22 | 0.037 | 1.03  | 0.336 | 1.09  | 0.102 | 1.06  | 0.175 |
| 1452262_at   | GrpE-like 2, mitochondrial                                                            | Grpel2        | 1.02  | 0.399 | 1.22 | 0.003 | 1.1   | 0.043 | 1.07  | 0.016 | 1.08  | 0.031 |
| 1438019_at   | inositol 1,3,4,5,6-pentakisphosphate 2-kinase                                         | Ippk          | 1.01  | 0.976 | 1.22 | 0.005 | 1.08  | 0.227 | 1.03  | 0.848 | 1.15  | 0.239 |
| 1420585_a_at | nuclear RNA export factor 2                                                           | Nxf2          | 1.21  | 0.998 | 1.22 | 0.022 | -1.02 | 0.815 | -1.1  | 0.256 | -1.01 | 0.979 |
| 1454888_at   | prefoldin 4                                                                           | Pfdn4         | 1.1   | 0.042 | 1.22 | 0.014 | 1.04  | 0.306 | 1.14  | 0.370 | 1.14  | 0.214 |
| 1436559_a_at | proteasome (prosome, macropain) 26S subunit, non-ATPase                               | Psm10         | 1.11  | 0.181 | 1.22 | 0.000 | 1.06  | 0.269 | 1.1   | 0.264 | -1.01 | 0.776 |
| 1448791_at   | sorting nexin 5                                                                       | Snx5          | 1.15  | 0.096 | 1.22 | 0.018 | 1.07  | 0.086 | 1.19  | 0.014 | 1.21  | 0.076 |
| 1443151_at   | Synaptojanin 2 binding protein                                                        | Synj2bp       | 1.69  | 0.233 | 1.22 | 0.039 | 1.02  | 0.782 | 1.05  | 0.502 | -1.14 | 0.392 |
| 1417820_at   | torsin family 1, member B                                                             | Tor1b         | -1    | 0.961 | 1.22 | 0.012 | -1.06 | 0.547 | 1.21  | 0.078 | 1.17  | 0.198 |
| 1434508_at   | ubiquitin-conjugating enzyme E2Q (putative)                                           | Ube2q         | 1.04  | 0.565 | 1.22 | 0.039 | 1.15  | 0.043 | 1.11  | 0.004 | 1.22  | 0.080 |
| 1437414_at   | zinc finger protein 217                                                               | Zfp217        | 1.06  | 0.126 | 1.22 | 0.005 | 1.01  | 0.888 | 1.17  | 0.006 | 1.29  | 0.005 |
| 1418801_at   | zinc finger with KRAB and SCAN domains 1                                              | Zkscan1       | 1     | 0.821 | 1.22 | 0.009 | 1.35  | 0.168 | 1.25  | 0.091 | -1.12 | 0.068 |
| 1417158_at   | ZXD family zinc finger C                                                              | Zxdc          | -1.04 | 0.651 | 1.22 | 0.016 | -1.01 | 0.927 | -1.14 | 0.191 | 1.57  | 0.027 |
| 1450067_a_at | RIKEN cDNA 1810034K20 gene                                                            | 1810034K20Rik | 1.11  | 0.076 | 1.21 | 0.022 | 1.13  | 0.005 | 1.11  | 0.121 | 1.06  | 0.280 |
| 1429364_at   | RIKEN cDNA 4930579G24 gene                                                            | 4930579G24Rik | 1.01  | 0.767 | 1.21 | 0.021 | 1.4   | 0.037 | 1.27  | 0.036 | 1.27  | 0.003 |
| 1419211_s_at | RIKEN cDNA 4933424B01 gene                                                            | 4933424B01Rik | 1.17  | 0.082 | 1.21 | 0.019 | -1.02 | 0.829 | 1.11  | 0.049 | -1.09 | 0.300 |
| 1457717_at   | expressed sequence AI987986                                                           | AI987986      | 1.35  | 0.183 | 1.21 | 0.047 | -1.01 | 0.675 | 1.12  | 0.965 | 1.17  | 0.408 |
| 1449523_at   | B-cell CLL/lymphoma 7C                                                                | Bcl7c         | 1.01  | 0.154 | 1.21 | 0.042 | 1.14  | 0.179 | 1.05  | 0.437 | 1.17  | 0.183 |
| 1454779_s_at | RIKEN cDNA C230052112 gene                                                            | C230052112Rik | 1     | 0.922 | 1.21 | 0.018 | 1.04  | 0.847 | 1.14  | 0.239 | 1.11  | 0.237 |
| 1452047_at   | calyculin binding protein                                                             | Cacybp        | 1.11  | 0.032 | 1.21 | 0.003 | 1.03  | 0.624 | 1.03  | 0.376 | 1.08  | 0.476 |
| 1454716_x_at | cytochrome c oxidase, subunit Vb                                                      | Cox5b         | 1.15  | 0.050 | 1.21 | 0.008 | 1.02  | 0.916 | 1.05  | 0.069 | 1.08  | 0.236 |
| 1455102_at   | RIKEN cDNA D330037H05 gene /// similar to La-related protein                          | D330037H05Rik | 1.08  | 0.027 | 1.21 | 0.033 | -1.01 | 0.405 | -1.03 | 0.210 | -1.12 | 0.245 |
| 1455108_at   | eukaryotic translation initiation factor 4E member 2                                  | Eif4e2        | -1.01 | 0.966 | 1.21 | 0.033 | 1.15  | 0.118 | 1.31  | 0.044 | 1.12  | 0.256 |
| 1417913_at   | GINS complex subunit 4 (Slf5 homolog)                                                 | Gins4         | 1.12  | 0.138 | 1.21 | 0.025 | -1    | 0.852 | 1.15  | 0.018 | -1.01 | 0.777 |
| 1435866_s_at | histone 3, H2a                                                                        | Hist3h2a      | -1.05 | 0.609 | 1.21 | 0.041 | 1.21  | 0.013 | 1.28  | 0.008 | 1.25  | 0.005 |
| 1427615_at   | integrin alpha 4                                                                      | Itga4         | -1.77 | 0.103 | 1.21 | 0.033 | 1.36  | 0.914 | -1    | 0.927 | -1.36 | 0.094 |
| 1428589_at   | mitochondrial ribosomal protein L41                                                   | Mrpl41        | 1.11  | 0.091 | 1.21 | 0.010 | 1.07  | 0.559 | 1     | 0.948 | 1.06  | 0.460 |
| 1449294_at   | mitochondrial ribosomal protein S15                                                   | Mrps15        | 1.08  | 0.350 | 1.21 | 0.007 | 1.04  | 0.550 | 1.1   | 0.066 | 1.16  | 0.083 |
| 1424286_at   | protein kinase, X-linked                                                              | Prkx          | 1.07  | 0.228 | 1.21 | 0.024 | 1.15  | 0.004 | 1.11  | 0.398 | 1.09  | 0.000 |
| 1416506_at   | proteasome (prosome, macropain) subunit, alpha type 6                                 | Psm6          | 1.11  | 0.055 | 1.21 | 0.008 | 1.03  | 0.422 | 1.01  | 0.992 | 1.08  | 0.088 |
| 1439635_at   | regulator of G-protein signaling 9                                                    | Rgs9          | 1.33  | 0.886 | 1.21 | 0.017 | 2.39  | 0.248 | -1.14 | 0.228 | -1.69 | 0.019 |
| 1434361_at   | SH3 and PX domain containing 3                                                        | Sh3px3        | -1.05 | 0.111 | 1.21 | 0.003 | 1.1   | 0.152 | 1.05  | 0.631 | 1.13  | 0.059 |
| 1421733_a_at | protein-tyrosine sulfotransferase 1                                                   | Tpst1         | 1.23  | 0.129 | 1.21 | 0.043 | 1.23  | 0.200 | 1.14  | 0.176 | 1.28  | 0.055 |
| 1449096_at   | RIKEN cDNA 0610011N22 gene                                                            | 0610011N22Rik | 1.05  | 0.205 | 1.2  | 0.010 | 1.06  | 0.394 | 1.18  | 0.114 | 1.1   | 0.261 |
| 1423705_at   | RIKEN cDNA 2310057D15 gene                                                            | 2310057D15Rik | 1.14  | 0.078 | 1.2  | 0.048 | -1.01 | 0.895 | 1.08  | 0.138 | 1.09  | 0.188 |
| 1460688_s_at | expressed sequence AA407659                                                           | AA407659      | -1.04 | 0.390 | 1.2  | 0.002 | 1.06  | 0.244 | 1.12  | 0.079 | 1.17  | 0.055 |
| 1416135_at   | apurinic/apyrimidinic endonuclease 1                                                  | Apex1         | 1.05  | 0.542 | 1.2  | 0.039 | 1.07  | 0.176 | 1.05  | 0.176 | 1.04  | 0.396 |
| 1452288_at   | expressed sequence BB128963                                                           | BB128963      | 1.04  | 0.965 | 1.2  | 0.049 | 1.09  | 0.278 | -1.03 | 0.427 | 1.05  | 0.268 |
| 1425646_at   | cDNA sequence BC016495                                                                | BC016495      | -1    | 0.799 | 1.2  | 0.039 | 1.29  | 0.164 | 1.24  | 0.155 | 1.2   | 0.111 |
| 1428865_at   | BCL2-like 12 (proline rich)                                                           | Bcl2l12       | 1.11  | 0.560 | 1.2  | 0.036 | 1.09  | 0.334 | 1.16  | 0.109 | 1.31  | 0.102 |
| 1433970_at   | bolA-like 3 (E. coli)                                                                 | BolA3         | 1.08  | 0.033 | 1.2  | 0.015 | 1.01  | 0.449 | 1.14  | 0.025 | 1.11  | 0.028 |
| 1423877_at   | chromatin assembly factor 1, subunit B (p60)                                          | Chaf1b        | 1.17  | 0.101 | 1.2  | 0.006 | 1.15  | 0.027 | 1.21  | 0.112 | 1.07  | 0.397 |
| 1416971_at   | cytochrome c oxidase, subunit VIIa 2                                                  | Cox7a2        | 1.13  | 0.090 | 1.2  | 0.025 | 1.13  | 0.074 | 1.13  | 0.013 | 1.03  | 0.468 |

|              |                                                                 |                  |       |       |       |       |       |       |       |       |       |       |
|--------------|-----------------------------------------------------------------|------------------|-------|-------|-------|-------|-------|-------|-------|-------|-------|-------|
| 1449406_at   | cysteine and histidine rich 1                                   | Cyhr1            | 1.22  | 0.219 | 1.2   | 0.004 | -1.04 | 0.174 | 1.03  | 0.864 | 1.34  | 0.164 |
| 1451103_at   | DNA segment, Chr 14, ERATO Doi 500, expressed                   | D14Erd500e       | 1.26  | 0.364 | 1.2   | 0.026 | 1.09  | 0.493 | 1.08  | 0.276 | 1.1   | 0.007 |
| 1422627_a_at | McKusick-Kaufman syndrome protein                               | Mkks             | 1.22  | 0.095 | 1.2   | 0.041 | 1.02  | 0.896 | 1.05  | 0.222 | 1.08  | 0.321 |
| 1417252_at   | 5',3'-nucleotidase, cytosolic                                   | Nt5c             | 1.04  | 0.472 | 1.2   | 0.013 | 1.16  | 0.006 | 1.07  | 0.339 | 1.1   | 0.049 |
| 1457716_at   | OTU domain containing 7B                                        | Otud7b           | 1.04  | 0.554 | 1.2   | 0.022 | 1.16  | 0.237 | 1.12  | 0.245 | 1.13  | 0.137 |
| 1448208_at   | MAD homolog 1 (Drosophila)                                      | Smad1            | -1.03 | 0.601 | 1.2   | 0.042 | 1.06  | 0.619 | -1.06 | 0.017 | 1.03  | 0.649 |
| 1416261_at   | transmembrane protein 19                                        | Tmem19           | 1.14  | 0.035 | 1.2   | 0.021 | 1.28  | 0.016 | 1.06  | 0.288 | 1.14  | 0.010 |
| 1433699_at   | tumor necrosis factor, alpha-induced protein 3                  | Tnfaip3          | 1.12  | 0.165 | 1.2   | 0.006 | 1.24  | 0.054 | 1.2   | 0.202 | 1.1   | 0.710 |
| 1428747_at   | tRNA selenocysteine associated protein 1                        | Trspap1          | 1.05  | 0.479 | 1.2   | 0.041 | 1.1   | 0.181 | 1.13  | 0.013 | 1.14  | 0.253 |
| 1417659_at   | vacuolar protein sorting 29 (S. pombe)                          | Vps29            | 1.23  | 0.071 | 1.2   | 0.014 | 1.03  | 0.790 | 1.01  | 0.709 | 1.13  | 0.161 |
| 1437111_at   | zinc finger CCCH type containing 12C                            | Zc3h12c          | 1.02  | 0.990 | 1.2   | 0.048 | -1.22 | 0.058 | 1.04  | 0.948 | -1.13 | 0.201 |
| 1427059_at   | RIKEN cDNA 4732495E13 gene                                      | 4732495E13Rik    | -1.1  | 0.226 | -1.2  | 0.027 | 1.04  | 0.655 | -1.12 | 0.032 | -1.03 | 0.553 |
| 1448250_at   | RIKEN cDNA 9030425E11 gene                                      | 9030425E11Rik    | 1.03  | 0.704 | -1.2  | 0.030 | 1.02  | 0.732 | -1.09 | 0.368 | -1.06 | 0.400 |
| 1447926_at   | ADP-ribosylation factor-like 5A                                 | Arl5a            | -1.04 | 0.491 | -1.2  | 0.033 | -1.14 | 0.097 | 1.03  | 0.947 | -1.09 | 0.615 |
| 1455400_at   | dimethylarginine dimethylaminohydrolase 1                       | Ddah1            | 1.07  | 0.580 | -1.2  | 0.020 | -1.09 | 0.105 | -1.14 | 0.029 | -1.15 | 0.106 |
| 1426759_at   | mitogen-activated protein kinase kinase kinase kinase 3 /// sii | Map4k3 /// LOC67 | 1.12  | 0.152 | -1.2  | 0.049 | -1.41 | 0.047 | -1.51 | 0.007 | -1.69 | 0.001 |
| 1419493_a_at | tumor protein D52                                               | Tpd52            | -1.01 | 0.675 | -1.2  | 0.044 | 1.02  | 0.571 | -1.05 | 0.182 | -1.07 | 0.364 |
| 1450066_at   | ubiquitin protein ligase E3 component n-recogin 1               | Ubr1             | 1.01  | 0.915 | -1.2  | 0.037 | -1.09 | 0.151 | -1.05 | 0.558 | -1.11 | 0.082 |
| 1428949_at   | exportin, tRNA (nuclear export receptor for tRNAs)              | Xpot             | -1.1  | 0.080 | -1.2  | 0.013 | -1.02 | 0.541 | -1.06 | 0.290 | -1.09 | 0.309 |
| 1451621_at   | RIKEN cDNA 5830417C01 gene                                      | 5830417C01Rik    | -1.04 | 0.629 | -1.21 | 0.025 | -1.11 | 0.302 | -1.09 | 0.062 | -1.06 | 0.144 |
| 1429383_at   | casein kinase 1, gamma 3                                        | Csnk1g3          | -1.05 | 0.533 | -1.21 | 0.046 | -1.04 | 0.480 | -1.3  | 0.016 | -1.29 | 0.051 |
| 1417143_at   | endothelial differentiation, lysophosphatidic acid G-protein-co | Edg2             | 1     | 0.991 | -1.21 | 0.023 | -1.05 | 0.464 | -1.29 | 0.009 | -1.15 | 0.086 |
| 1428011_a_at | ErbB2 interacting protein                                       | ErbB2ip          | -1.08 | 0.468 | -1.21 | 0.010 | -1.08 | 0.126 | -1.24 | 0.085 | -1.11 | 0.052 |
| 1417673_at   | growth factor receptor bound protein 14                         | Grb14            | 1.1   | 0.479 | -1.21 | 0.022 | -1.18 | 0.005 | -1.13 | 0.118 | -1.12 | 0.046 |
| 1452030_a_at | heterogeneous nuclear ribonucleoprotein R                       | Hnrpr            | -1.05 | 0.702 | -1.21 | 0.031 | -1.07 | 0.592 | -1.01 | 0.820 | -1.16 | 0.303 |
| 1428667_at   | monoamine oxidase A                                             | Maoa             | -1.06 | 0.356 | -1.21 | 0.045 | 1.04  | 0.679 | -1.07 | 0.107 | -1.11 | 0.049 |
| 1452740_at   | myosin, heavy polypeptide 10, non-muscle                        | Myh10            | -1.04 | 0.491 | -1.21 | 0.045 | -1.11 | 0.026 | -1.11 | 0.133 | -1.1  | 0.044 |
| 1417624_at   | Ngfi-A binding protein 1                                        | Nab1             | 1.01  | 0.959 | -1.21 | 0.037 | 1.06  | 0.406 | 1.02  | 0.894 | -1.21 | 0.041 |
| 1431375_s_at | parvin, alpha                                                   | Parva            | -1.06 | 0.130 | -1.21 | 0.035 | -1.01 | 0.772 | -1.1  | 0.138 | -1.08 | 0.046 |
| 1423448_at   | RAB11B, member RAS oncogene family                              | Rab11b           | -1.14 | 0.004 | -1.21 | 0.040 | 1.04  | 0.418 | -1.04 | 0.410 | -1.05 | 0.209 |
| 1426799_at   | RAB8B, member RAS oncogene family                               | Rab8b            | -1.05 | 0.308 | -1.21 | 0.049 | -1.08 | 0.322 | -1.07 | 0.415 | -1.22 | 0.010 |
| 1454962_at   | spire homolog 1 (Drosophila)                                    | Spire1           | 1.1   | 0.264 | -1.21 | 0.048 | -1.14 | 0.030 | -1.23 | 0.038 | -1.39 | 0.006 |
| 1433874_at   | slingshot homolog 1 (Drosophila)                                | Ssh1             | -1.05 | 0.367 | -1.21 | 0.015 | -1.04 | 0.831 | -1.12 | 0.300 | -1.19 | 0.070 |
| 1433807_at   | RIKEN cDNA 6720463M24 gene                                      | 6720463M24Rik    | -1.01 | 0.736 | -1.22 | 0.012 | 1.13  | 0.463 | -1    | 0.751 | -1.06 | 0.523 |
| 1433897_at   | expressed sequence A1597468                                     | A1597468         | -1.09 | 0.381 | -1.22 | 0.031 | 1.03  | 0.706 | -1.03 | 0.579 | -1.08 | 0.386 |
| 1454863_at   | ankyrin repeat domain 11                                        | Ankrd11          | -1.15 | 0.098 | -1.22 | 0.033 | -1.24 | 0.129 | -1.27 | 0.068 | -1.29 | 0.099 |
| 1426755_at   | cytoskeleton-associated protein 4                               | Ckap4            | -1.2  | 0.015 | -1.22 | 0.045 | -1.26 | 0.045 | 1.03  | 0.775 | 1.05  | 0.553 |
| 1448149_at   | catenin (cadherin associated protein), alpha 1                  | Ctnna1           | -1.06 | 0.189 | -1.22 | 0.016 | -1.03 | 0.453 | -1.06 | 0.186 | -1.21 | 0.004 |
| 1428354_at   | forkhead box K2                                                 | Foxk2            | -1.06 | 0.076 | -1.22 | 0.003 | -1.04 | 0.436 | -1.1  | 0.055 | -1.2  | 0.029 |
| 1453146_at   | GTPase activating protein and VPS9 domains 1                    | Gapvd1           | -1.17 | 0.214 | -1.22 | 0.037 | -1.1  | 0.291 | -1.14 | 0.119 | -1.04 | 0.474 |
| 1423144_at   | phosphatidylinositol 3-kinase, catalytic, alpha polypeptide     | Pik3ca           | -1.12 | 0.008 | -1.22 | 0.032 | -1.1  | 0.104 | -1.08 | 0.407 | -1.1  | 0.304 |
| 1418039_at   | RAB, member of RAS oncogene family-like 3                       | Rab13            | -1.13 | 0.061 | -1.22 | 0.009 | -1.12 | 0.060 | -1.17 | 0.019 | -1.23 | 0.014 |
| 1460337_at   | SH3-domain kinase binding protein 1                             | Sh3kbp1          | 1.04  | 0.176 | -1.22 | 0.001 | -1.19 | 0.008 | -1.18 | 0.067 | -1.26 | 0.018 |
| 1436137_at   | solute carrier family 6 (neurotransmitter transporter), member  | Slc6a17          | -1.09 | 0.241 | -1.22 | 0.014 | 1.01  | 0.987 | 1.03  | 0.598 | -1.03 | 0.732 |
| 1460700_at   | signal transducer and activator of transcription 3              | Stat3            | -1.02 | 0.776 | -1.22 | 0.031 | -1.14 | 0.059 | -1.08 | 0.022 | -1.09 | 0.154 |
| 1433740_at   | RIKEN cDNA 2610301K12 gene                                      | 2610301K12Rik    | -1.12 | 0.373 | -1.23 | 0.028 | 1.07  | 0.391 | -1.02 | 0.813 | 1.01  | 0.976 |
| 1426534_a_at | ADP-ribosylation factor GTPase activating protein 3             | Arfgap3          | 1.04  | 0.590 | -1.23 | 0.007 | -1.19 | 0.007 | -1.08 | 0.097 | -1.24 | 0.027 |
| 1415711_at   | ADP-ribosylation factor guanine nucleotide-exchange factor 1    | Arfgef1          | -1.03 | 0.606 | -1.23 | 0.017 | -1.1  | 0.026 | -1.16 | 0.176 | -1.37 | 0.001 |
| 1438606_a_at | chloride intracellular channel 4 (mitochondrial)                | Clic4            | -1.01 | 0.253 | -1.23 | 0.015 | -1.1  | 0.027 | -1.11 | 0.069 | -1.13 | 0.069 |
| 1417563_at   | eukaryotic translation initiation factor 4E binding protein 1   | Eif4ebp1         | -1.09 | 0.394 | -1.23 | 0.016 | -1.08 | 0.350 | -1.08 | 0.544 | -1.09 | 0.251 |
| 1428470_at   | exocyst complex component 2                                     | Exoc2            | 1.09  | 0.046 | -1.23 | 0.027 | -1.16 | 0.292 | -1.24 | 0.004 | -1.13 | 0.443 |
| 1437225_x_at | guanine nucleotide binding protein, alpha inhibiting 3          | Gnai3            | -1.2  | 0.289 | -1.23 | 0.039 | 1.04  | 0.938 | -1.28 | 0.121 | 1.11  | 0.394 |
| 1451629_at   | limb-bud and heart                                              | Lbh              | -1.02 | 0.425 | -1.23 | 0.001 | -1.1  | 0.154 | -1.04 | 0.507 | -1.11 | 0.014 |
| 1456945_at   | nudix (nucleoside diphosphate linked moiety X)-type motif 6     | Nudt6            | -1    | 0.934 | -1.23 | 0.002 | -1.13 | 0.046 | -1.18 | 0.086 | -1.18 | 0.005 |
| 1441617_at   | positive cofactor 2, multiprotein complex, glutamine/Q-rich-as  | Pcqap            | -1.21 | 0.032 | -1.23 | 0.007 | -1.04 | 0.501 | 1.03  | 0.913 | -1.35 | 0.071 |
| 1433761_at   | phosphodiesterase 4D interacting protein (myomegalin)           | Pde4dip          | -1.15 | 0.015 | -1.23 | 0.041 | -1.07 | 0.411 | -1.15 | 0.018 | -1.18 | 0.109 |
| 1432129_a_at | paired related homeobox 1                                       | Prrx1            | 1.12  | 0.200 | -1.23 | 0.008 | -1.17 | 0.005 | -1.2  | 0.025 | -1.28 | 0.042 |
| 1420843_at   | protein tyrosine phosphatase, receptor type, F                  | Ptpfr            | -1.06 | 0.479 | -1.23 | 0.014 | 1.09  | 0.492 | -1.05 | 0.527 | 1.04  | 0.696 |



|              |                                                             |               |       |       |       |       |       |       |       |       |       |       |
|--------------|-------------------------------------------------------------|---------------|-------|-------|-------|-------|-------|-------|-------|-------|-------|-------|
| 1433871_at   | R3H domain 1 (binds single-stranded nucleic acids)          | R3hdm1        | 1.06  | 0.334 | -1.23 | 0.014 | -1.29 | 0.031 | -1.17 | 0.004 | -1.19 | 0.023 |
| 1422523_at   | silver                                                      | Sl            | 1.34  | 0.374 | -1.23 | 0.046 | -1.04 | 0.793 | 1.26  | 0.534 | -1.3  | 0.304 |
| 1452445_at   | solute carrier family 41, member 2                          | Slc41a2       | 1.17  | 0.245 | -1.23 | 0.043 | -1.15 | 0.024 | -1.13 | 0.022 | -1.27 | 0.002 |
| 1426531_at   | zinc finger, MYND domain containing 11                      | Zmynd11       | -1.13 | 0.227 | -1.23 | 0.039 | -1.09 | 0.203 | -1.02 | 0.574 | -1.2  | 0.040 |
| 1429353_a_at | RIKEN cDNA 4930511M11 gene                                  | 4930511M11Rik | 1.55  | 0.566 | -1.24 | 0.037 | 1.47  | 0.423 | 1.12  | 0.459 | -1.04 | 0.577 |
| 1434376_at   | CD44 antigen                                                | Cd44          | 1.04  | 0.753 | -1.24 | 0.040 | -1.08 | 0.061 | -1.12 | 0.038 | -1.13 | 0.002 |
| 1452867_at   | procollagen, type IV, alpha 3 (Goodpasture antigen) binding | Col4a3bp      | 1.07  | 0.314 | -1.24 | 0.022 | -1.13 | 0.090 | -1.22 | 0.095 | -1.25 | 0.003 |
| 1423661_s_at | CTD (carboxy-terminal domain, RNA polymerase II, polypept   | Ctdsp2        | -1.23 | 0.142 | -1.24 | 0.004 | -1.04 | 0.598 | -1    | 0.953 | -1.06 | 0.265 |
| 1417567_at   | catenin beta interacting protein 1                          | Ctnnbp1       | -1.19 | 0.047 | -1.24 | 0.045 | 1.07  | 0.510 | 1.12  | 0.201 | 1.09  | 0.463 |
| 1416125_at   | FK506 binding protein 5                                     | Fkbp5         | -1.12 | 0.233 | -1.24 | 0.022 | 1.2   | 0.133 | -1.03 | 0.747 | -1.11 | 0.386 |
| 1420980_at   | p21 (CDKN1A)-activated kinase 1                             | Pak1          | -1.13 | 0.258 | -1.24 | 0.014 | 1.14  | 0.869 | -1.05 | 0.426 | 1.03  | 0.956 |
| 1420611_at   | protein kinase, cAMP dependent, catalytic, beta             | Prkacb        | -1.03 | 0.515 | -1.24 | 0.002 | -1.12 | 0.098 | -1.07 | 0.171 | -1.15 | 0.162 |
| 1422785_at   | RAS p21 protein activator 2                                 | Rasa2         | -1.04 | 0.628 | -1.24 | 0.033 | -1.23 | 0.029 | -1.32 | 0.047 | -1.25 | 0.001 |
| 1420974_at   | SET domain, bifurcated 1                                    | Setdb1        | -1.27 | 0.250 | -1.24 | 0.028 | 1.03  | 0.953 | -1.08 | 0.498 | -1.57 | 0.183 |
| 1442237_at   | Sequestosome 1                                              | Sqstm1        | -1.34 | 0.093 | -1.24 | 0.044 | -1.13 | 0.464 | -1.05 | 0.499 | 1.49  | 0.029 |
| 1425011_x_at | syntaxin 18                                                 | Sbx18         | -1.04 | 0.406 | -1.24 | 0.023 | -1.15 | 0.067 | -1.08 | 0.151 | -1.1  | 0.167 |
| 1428586_at   | transmembrane protein 41B                                   | Tmem41b       | -1.19 | 0.184 | -1.24 | 0.035 | 1.08  | 0.780 | 1     | 0.963 | 1.09  | 0.467 |
| 1448670_at   | ubiquitin-conjugating enzyme E2E 3, UBC4/5 homolog (yeast)  | Ube2e3        | -1.07 | 0.368 | -1.24 | 0.014 | -1.02 | 0.392 | -1.18 | 0.019 | -1.13 | 0.051 |
| 1428431_at   | RIKEN cDNA 2310047A01 gene                                  | 2310047A01Rik | -1.03 | 0.665 | -1.25 | 0.001 | -1.08 | 0.048 | 1.03  | 0.592 | -1.11 | 0.108 |
| 1455072_at   | centrosomal protein 350                                     | Cep350        | 1.06  | 0.133 | -1.25 | 0.005 | -1.13 | 0.185 | -1.35 | 0.023 | -1.46 | 0.008 |
| 1454654_at   | disrupted in renal carcinoma 2 (human)                      | Dirc2         | -1.1  | 0.147 | -1.25 | 0.016 | 1.05  | 0.466 | -1.1  | 0.057 | 1.07  | 0.644 |
| 1421929_at   | Eph receptor A4                                             | Epha4         | -1.29 | 0.021 | -1.25 | 0.028 | -1.65 | 0.142 | -1.33 | 0.019 | -1.33 | 0.166 |
| 1459622_at   | gene model 22, (NCBI)                                       | Gm22          | -1.04 | 0.244 | -1.25 | 0.048 | -1.06 | 0.346 | -1.14 | 0.005 | -1.23 | 0.014 |
| 1455048_at   | immunoglobulin superfamily, member 3                        | Igsf3         | -1.05 | 0.282 | -1.25 | 0.039 | -1.08 | 0.557 | -1.06 | 0.459 | -1    | 0.892 |
| 1437268_at   | LanC lantibiotic synthetase component C-like 3 (bacterial)  | Lanc3         | -1.13 | 0.226 | -1.25 | 0.031 | 1.21  | 0.312 | -1.02 | 0.662 | -1.01 | 0.871 |
| 1430365_at   | nuclear transcription factor, X-box binding-like 1          | Nfxl1         | 1.76  | 0.985 | -1.25 | 0.036 | 2.76  | 0.816 | 1.31  | 0.779 | -1.11 | 0.757 |
| 1449059_x_at | 3-oxoacid CoA transferase 1                                 | Oxct1         | -1.07 | 0.126 | -1.25 | 0.009 | -1.1  | 0.131 | -1.09 | 0.042 | -1.14 | 0.130 |
| 1415729_at   | 3-phosphoinositide dependent protein kinase-1               | Pdpk1         | -1.11 | 0.214 | -1.25 | 0.017 | -1.02 | 0.513 | -1.23 | 0.003 | -1.16 | 0.047 |
| 1434924_at   | PHD finger protein 2                                        | Phf2          | -1    | 0.883 | -1.25 | 0.030 | 1.09  | 0.060 | -1.37 | 0.015 | -1.22 | 0.211 |
| 1419945_s_at | RAB2, member RAS oncogene family                            | Rab2          | -1.03 | 0.303 | -1.25 | 0.007 | -1.13 | 0.068 | -1.09 | 0.018 | -1.21 | 0.049 |
| 1424134_at   | ring finger and SPRY domain containing 1                    | Rspry1        | 1.02  | 0.817 | -1.25 | 0.020 | -1.2  | 0.102 | -1.07 | 0.009 | -1.14 | 0.085 |
| 1431204_at   | RIKEN cDNA 4930578N16 gene                                  | 4930578N16Rik | 1.21  | 0.792 | -1.26 | 0.040 | 1.61  | 0.796 | 1.18  | 0.238 | 2     | 0.950 |
| 1454609_x_at | RIKEN cDNA 6430527G18 gene                                  | 6430527G18Rik | -1.1  | 0.267 | -1.26 | 0.038 | -1.02 | 0.570 | -1.06 | 0.602 | 1.15  | 0.420 |
| 1434797_at   | RIKEN cDNA 6720469N11 gene                                  | 6720469N11Rik | -1.03 | 0.586 | -1.26 | 0.044 | -1.28 | 0.066 | -1.35 | 0.003 | -1.32 | 0.010 |
| 1454918_at   | alkylglycerone phosphate synthase                           | Agps          | 1.02  | 0.854 | -1.26 | 0.007 | -1.2  | 0.172 | -1.29 | 0.072 | -1.42 | 0.003 |
| 1442632_at   | Centaurin, gamma 2                                          | Centg2        | -1.25 | 0.056 | -1.26 | 0.010 | -1.2  | 0.187 | 1.09  | 0.974 | -1.05 | 0.295 |
| 1455440_at   | chloride channel 6                                          | Clcn6         | 1.02  | 0.952 | -1.26 | 0.012 | -1.29 | 0.025 | -1.2  | 0.188 | -1.37 | 0.013 |
| 1426407_at   | CUG triplet repeat, RNA binding protein 1                   | Cugbp1        | -1.12 | 0.288 | -1.26 | 0.036 | -1.05 | 0.284 | -1.19 | 0.003 | -1.11 | 0.094 |
| 1424981_at   | neurolysin (metallopeptidase M3 family)                     | Nln           | 1.04  | 0.535 | -1.26 | 0.012 | -1.11 | 0.027 | -1.04 | 0.419 | -1.07 | 0.472 |
| 1429564_at   | polycomb group ring finger 5                                | Pcgf5         | 1     | 0.961 | -1.26 | 0.015 | -1.02 | 0.613 | -1.13 | 0.129 | -1.09 | 0.278 |
| 1448568_a_at | solute carrier family 20, member 1                          | Slc20a1       | -1.02 | 0.679 | -1.26 | 0.001 | -1.1  | 0.033 | -1.11 | 0.000 | -1.23 | 0.005 |
| 1436319_at   | sulfatase 1                                                 | Sulf1         | 1.13  | 0.383 | -1.26 | 0.006 | 1.21  | 0.333 | 1.02  | 0.702 | -1.17 | 0.298 |
| 1452299_at   | WW domain containing E3 ubiquitin protein ligase 1          | Wwp1          | 1.01  | 0.947 | -1.26 | 0.001 | 1.01  | 0.979 | 1.01  | 0.956 | -1.01 | 0.664 |
| 1422032_a_at | zinc finger, AN1-type domain 6                              | Zfand6        | 1     | 0.981 | -1.26 | 0.011 | -1.04 | 0.413 | -1.08 | 0.085 | -1.23 | 0.008 |
| 1437208_at   | septin 10                                                   | 10-Sep        | -1.08 | 0.240 | -1.27 | 0.035 | -1.03 | 0.559 | -1.08 | 0.226 | 1.09  | 0.605 |
| 1460455_at   | RIKEN cDNA 1110059H15 gene                                  | 1110059H15Rik | -1.06 | 0.452 | -1.27 | 0.011 | -1.02 | 0.546 | -1.36 | 0.020 | -1.39 | 0.084 |
| 1453392_at   | RIKEN cDNA 1810054D07 gene                                  | 1810054D07Rik | -1.04 | 0.369 | -1.27 | 0.037 | -1.27 | 0.012 | -1.09 | 0.433 | -1.25 | 0.092 |
| 1430496_at   | RIKEN cDNA 6720408I04 gene                                  | 6720408I04Rik | -1.19 | 0.253 | -1.27 | 0.048 | -1.49 | 0.313 | 1.16  | 0.310 | 1.2   | 0.928 |
| 1455032_at   | RIKEN cDNA 9630037P07 gene                                  | 9630037P07Rik | 1     | 0.958 | -1.27 | 0.025 | -1.19 | 0.007 | -1.12 | 0.007 | -1.16 | 0.003 |
| 1429083_at   | amylo-1,6-glucosidase, 4-alpha-glucanotransferase           | Agl           | -1.11 | 0.403 | -1.27 | 0.004 | -1.01 | 0.987 | 1.13  | 0.562 | 1.04  | 0.972 |
| 1460703_at   | activating signal cointegrator 1 complex subunit 1          | Ascc1         | -1.1  | 0.254 | -1.27 | 0.004 | 1.05  | 0.295 | 1.02  | 0.857 | -1.04 | 0.395 |
| 1420652_at   | arginine-tRNA-protein transferase 1                         | Ate1          | 1.18  | 0.204 | -1.27 | 0.020 | -1.71 | 0.036 | -1.57 | 0.007 | -1.84 | 0.029 |
| 1449595_at   | expressed sequence C79490                                   | C79490        | -1.18 | 0.337 | -1.27 | 0.037 | -1.15 | 0.625 | -1.11 | 0.522 | 1.5   | 0.918 |
| 1428537_at   | casein kinase 1, alpha 1                                    | Cskn1a1       | -1.08 | 0.245 | -1.27 | 0.032 | -1.13 | 0.046 | -1.16 | 0.095 | -1.16 | 0.005 |
| 1436896_at   | DNA segment, Chr 14, ERATO Doi 231, expressed               | D14Erd231e    | -1.14 | 0.172 | -1.27 | 0.024 | 1     | 0.988 | -1.04 | 0.367 | -1.05 | 0.560 |
| 1437974_x_at | hexokinase 1                                                | Hk1           | -1.15 | 0.059 | -1.27 | 0.044 | -1.12 | 0.078 | -1.15 | 0.032 | 1.02  | 0.693 |
| 1433445_x_at | 3-hydroxy-3-methylglutaryl-Coenzyme A synthase 1            | Hmgcs1        | -1.02 | 0.232 | -1.27 | 0.046 | -1.09 | 0.260 | -1.11 | 0.169 | -1.11 | 0.130 |
| 1450730_at   | heparan sulfate 2-O-sulfotransferase 1                      | Hs2st1        | 1.03  | 0.695 | -1.27 | 0.006 | -1.2  | 0.003 | -1.04 | 0.474 | -1.27 | 0.007 |

|              |                                                                  |                   |       |       |       |       |       |       |       |       |       |       |
|--------------|------------------------------------------------------------------|-------------------|-------|-------|-------|-------|-------|-------|-------|-------|-------|-------|
| 1437103_at   | insulin-like growth factor 2 mRNA binding protein 2              | Igf2bp2           | 1.01  | 0.898 | -1.27 | 0.042 | -1.26 | 0.003 | -1.25 | 0.001 | -1.37 | 0.009 |
| 1424885_at   | kelch domain containing 8A                                       | Klhdc8a           | -1.03 | 0.550 | -1.27 | 0.011 | 1.08  | 0.293 | -1.06 | 0.228 | -1.11 | 0.054 |
| 1420728_at   | keratin 32                                                       | Krt32             | -1.14 | 0.099 | -1.27 | 0.045 | -1.15 | 0.364 | 1.05  | 0.842 | -1.08 | 0.478 |
| 1421926_at   | mitogen-activated protein kinase 11                              | Mapk11            | 1.02  | 0.933 | -1.27 | 0.015 | 1.03  | 0.682 | -1.22 | 0.108 | -1.04 | 0.845 |
| 1419048_at   | pecanex homolog (Drosophila)                                     | Pcnx              | 1.04  | 0.011 | -1.27 | 0.000 | -1.12 | 0.256 | -1.16 | 0.027 | -1.18 | 0.147 |
| 1437953_at   | preimplantation protein 4                                        | Prei4             | -1.02 | 0.688 | -1.27 | 0.038 | 1.23  | 0.665 | 1.15  | 0.730 | 1.15  | 0.860 |
| 1427006_at   | Rap guanine nucleotide exchange factor (GEF) 1                   | Rapgef1           | -1.09 | 0.110 | -1.27 | 0.032 | -1.04 | 0.685 | -1.23 | 0.021 | -1.19 | 0.214 |
| 1451073_at   | signal peptide peptidase 3                                       | Sppi3             | -1.09 | 0.291 | -1.27 | 0.033 | 1.11  | 0.440 | -1.22 | 0.051 | -1.11 | 0.434 |
| 1460243_at   | serine palmitoyltransferase, long chain base subunit 2           | Sptlc2            | 1.01  | 0.892 | -1.27 | 0.013 | -1.18 | 0.169 | -1.11 | 0.048 | -1.24 | 0.022 |
| 1435841_s_at | succinate-Coenzyme A ligase, GDP-forming, beta subunit           | Suclg2            | -1.04 | 0.295 | -1.27 | 0.016 | -1.08 | 0.020 | -1.07 | 0.139 | -1.01 | 0.724 |
| 1456623_at   | tropomyosin 1, alpha                                             | Tpm1              | -1.04 | 0.504 | -1.27 | 0.015 | -1.28 | 0.212 | -1.23 | 0.025 | -1.15 | 0.141 |
| 1435608_at   | zinc and ring finger 3 /// similar to Goliath homolog precursor  | Znrf3 /// LOC6318 | -1.05 | 0.634 | -1.27 | 0.008 | -1.05 | 0.584 | -1.3  | 0.001 | -1.21 | 0.040 |
| 1436638_at   | RIKEN cDNA 6720401G13 gene                                       | 6720401G13Rik     | 1.05  | 0.907 | -1.28 | 0.049 | -1.2  | 0.345 | 1.39  | 0.096 | 1.19  | 0.690 |
| 1424214_at   | RIKEN cDNA 9130213B05 gene                                       | 9130213B05Rik     | -1.02 | 0.370 | -1.28 | 0.028 | -1    | 0.894 | -1.13 | 0.136 | -1.18 | 0.069 |
| 1435975_at   | expressed sequence AI115600                                      | AI115600          | -1.14 | 0.090 | -1.28 | 0.042 | 1.15  | 0.251 | -1.45 | 0.015 | -1.33 | 0.119 |
| 1434630_at   | ankyrin repeat domain 28                                         | Ankrd28           | 1.02  | 0.452 | -1.28 | 0.044 | -1.15 | 0.035 | -1.25 | 0.025 | -1.4  | 0.003 |
| 1434362_at   | expressed sequence AW550831                                      | AW550831          | 1.03  | 0.800 | -1.28 | 0.009 | 1.03  | 0.587 | -1.02 | 0.631 | -1.13 | 0.209 |
| 1418659_at   | circadian locomotor output cycles kaput                          | Clock             | -1.01 | 0.769 | -1.28 | 0.024 | -1.2  | 0.137 | -1.16 | 0.160 | -1.53 | 0.032 |
| 1450625_at   | procollagen, type V, alpha 2                                     | Col5a2            | -1    | 0.861 | -1.28 | 0.009 | -1.17 | 0.003 | -1.18 | 0.026 | -1.21 | 0.013 |
| 1418508_a_at | growth factor receptor bound protein 2                           | Grb2              | -1.45 | 0.044 | -1.28 | 0.019 | 1.17  | 0.510 | -1.3  | 0.026 | 1.12  | 0.447 |
| 1434060_at   | hect (homologous to the E6-AP (UBE3A) carboxyl terminus)         | Herc1             | 1.18  | 0.045 | -1.28 | 0.020 | -1.23 | 0.065 | -1.25 | 0.151 | -1.28 | 0.082 |
| 1419647_a_at | immediate early response 3                                       | Ier3              | -1.16 | 0.103 | -1.28 | 0.040 | -1.07 | 0.168 | -1.17 | 0.037 | -1.05 | 0.226 |
| 1448925_at   | twist homolog 2 (Drosophila)                                     | Twist2            | -1.06 | 0.022 | -1.28 | 0.038 | -1.14 | 0.162 | -1.11 | 0.134 | -1.22 | 0.015 |
| 1426909_at   | uridine-cytidine kinase 2                                        | Uck2              | -1.06 | 0.436 | -1.28 | 0.010 | 1.05  | 0.668 | 1.17  | 0.275 | 1.14  | 0.438 |
| 1456487_at   | adenylate cyclase 1                                              | Adcy1             | -1.18 | 0.420 | -1.29 | 0.043 | -1.24 | 0.176 | 1.19  | 0.157 | -1.1  | 0.365 |
| 1446965_at   | Rho guanine nucleotide exchange factor (GEF) 12                  | Arhgef12          | -1.37 | 0.163 | -1.29 | 0.042 | -1.12 | 0.457 | -1.02 | 0.695 | -1.24 | 0.034 |
| 1416551_at   | ATPase, Ca++ transporting, cardiac muscle, slow twitch 2         | Atp2a2            | -1.03 | 0.298 | -1.29 | 0.005 | -1.09 | 0.361 | -1.03 | 0.566 | -1.07 | 0.220 |
| 1437244_at   | growth arrest-specific 2 like 3                                  | Gas2l3            | 1.05  | 0.519 | -1.29 | 0.007 | 1.06  | 0.954 | 1.08  | 0.354 | 1.05  | 0.893 |
| 1417434_at   | glycerol phosphate dehydrogenase 2, mitochondrial                | Gpd2              | 1.05  | 0.273 | -1.29 | 0.007 | -1.13 | 0.220 | -1.12 | 0.078 | -1.2  | 0.097 |
| 1448890_at   | Kruppel-like factor 2 (lung)                                     | Klf2              | -1.04 | 0.447 | -1.29 | 0.022 | -1.03 | 0.722 | -1.04 | 0.087 | -1.09 | 0.331 |
| 1454930_at   | leucine rich repeat containing 35                                | Lrrc35            | -1.12 | 0.192 | -1.29 | 0.030 | -1    | 0.908 | -1.03 | 0.706 | 1.01  | 0.743 |
| 1426319_at   | platelet-derived growth factor, D polypeptide                    | Pdgfrd            | -1.04 | 0.635 | -1.29 | 0.023 | -1.04 | 0.488 | 1.07  | 0.796 | -1.06 | 0.682 |
| 1435251_at   | sorting nexin 13                                                 | Snx13             | 1.05  | 0.862 | -1.29 | 0.035 | -1.06 | 0.375 | -1.18 | 0.021 | -1.48 | 0.000 |
| 1436805_at   | RIKEN cDNA 2810457106 gene                                       | 2810457106Rik     | -1.14 | 0.374 | -1.3  | 0.012 | -1.01 | 0.921 | -1.63 | 0.004 | -1.35 | 0.076 |
| 1426339_at   | adenylate kinase 5                                               | Aks5              | -1.14 | 0.160 | -1.3  | 0.023 | -1.07 | 0.305 | 1.06  | 0.371 | -1.17 | 0.273 |
| 1420618_at   | cytoplasmic polyadenylation element binding protein 4            | Cpeb4             | -1.11 | 0.395 | -1.3  | 0.013 | 1     | 0.893 | -1.19 | 0.032 | -1.16 | 0.113 |
| 1428737_s_at | GRAM domain containing 3                                         | Gramd3            | -1.12 | 0.182 | -1.3  | 0.011 | -1.05 | 0.472 | 1.03  | 0.786 | -1.11 | 0.178 |
| 1425142_a_at | heterogeneous nuclear ribonucleoprotein D                        | Hnrpd             | -1.11 | 0.036 | -1.3  | 0.026 | -1.29 | 0.008 | -1.24 | 0.008 | -1.19 | 0.103 |
| 1418628_at   | KH domain containing, RNA binding, signal transduction assoc     | Khdrbs1           | -1.08 | 0.443 | -1.3  | 0.045 | -1.03 | 0.649 | -1.06 | 0.584 | 1.03  | 0.914 |
| 1448647_at   | mannosidase 2, alpha 1                                           | Man2a1            | 1.01  | 0.847 | -1.3  | 0.008 | -1.13 | 0.055 | -1.09 | 0.114 | -1.22 | 0.000 |
| 1417584_at   | solute carrier family 11 (proton-coupled divalent metal ion tra  | Slc11a2           | 1.04  | 0.980 | -1.3  | 0.027 | 1.1   | 0.413 | 1.2   | 0.073 | 1.19  | 0.237 |
| 1424905_a_at | solute carrier family 39 (metal ion transporter), member 11      | Slc39a11          | -1.14 | 0.064 | -1.3  | 0.045 | -1.12 | 0.254 | -1.12 | 0.012 | -1.18 | 0.037 |
| 1459168_at   | Zinc finger protein 521                                          | Zfp521            | 1.08  | 0.421 | -1.3  | 0.034 | -1.02 | 0.684 | -1.44 | 0.131 | 1.74  | 0.805 |
| 1438280_at   | RIKEN cDNA 1700023L04 gene                                       | 1700023L04Rik     | 1.01  | 0.683 | -1.31 | 0.029 | -1.65 | 0.066 | 1.73  | 0.560 | 2.4   | 0.043 |
| 1450643_s_at | acyl-CoA synthetase long-chain family member 1                   | Acsl1             | 1.08  | 0.781 | -1.31 | 0.049 | 1.17  | 0.503 | 1.04  | 0.893 | 1.06  | 0.767 |
| 1448712_at   | choroideremia                                                    | Chm               | 1.02  | 0.964 | -1.31 | 0.038 | -1.13 | 0.095 | 1.01  | 0.873 | -1.48 | 0.056 |
| 1456133_x_at | integrin beta 5                                                  | Itgbb5            | -1.14 | 0.148 | -1.31 | 0.038 | -1.07 | 0.236 | -1.06 | 0.007 | -1.06 | 0.428 |
| 1457449_at   | Longevity assurance homolog 6 (S. cerevisiae)                    | Lass6             | 1.01  | 0.994 | -1.31 | 0.012 | -1.31 | 0.159 | 1.26  | 0.100 | -1.65 | 0.058 |
| 1417827_at   | N-glycanase 1                                                    | Ngly1             | -1.06 | 0.190 | -1.31 | 0.018 | -1.05 | 0.241 | -1.01 | 0.794 | -1.07 | 0.289 |
| 1447408_at   | Nipped-B homolog (Drosophila)                                    | Nipbl             | -1.01 | 0.418 | -1.31 | 0.023 | -1.24 | 0.370 | 1.38  | 0.829 | -1.03 | 0.806 |
| 1440348_at   | zinc finger, FYVE domain containing 9                            | Zfyve9            | -1.13 | 0.144 | -1.31 | 0.002 | -1.17 | 0.011 | -1.29 | 0.038 | -1.1  | 0.006 |
| 1421949_a_at | RIKEN cDNA 2610507L03 gene                                       | 2610507L03Rik     | 1.07  | 0.802 | -1.32 | 0.022 | -1.03 | 0.630 | 1.25  | 0.055 | -1.15 | 0.076 |
| 1435568_at   | cDNA sequence AK129128                                           | AK129128          | -1.03 | 0.629 | -1.32 | 0.024 | -1.11 | 0.087 | -1.12 | 0.154 | -1.31 | 0.060 |
| 1450910_at   | CAP, adenylate cyclase-associated protein, 2 (yeast)             | Cap2              | 1.09  | 0.566 | -1.32 | 0.042 | -1.28 | 0.064 | -1.11 | 0.116 | -1.19 | 0.016 |
| 1426491_at   | hect (homologous to the E6-AP (UBE3A) carboxyl terminus)         | Herc2             | -1.13 | 0.065 | -1.32 | 0.050 | -1.25 | 0.001 | -1.3  | 0.054 | -1.4  | 0.006 |
| 1431160_x_at | similar to gonadotropin inducible ovarian transcription factor 1 | LOC628850 /// LOC | -1.09 | 0.338 | -1.32 | 0.016 | -1.01 | 0.836 | -1.06 | 0.696 | 1.51  | 0.128 |
| 1439115_at   | microcephaly, primary autosomal recessive 1                      | Mcp1              | -1.12 | 0.592 | -1.32 | 0.046 | 1.12  | 0.559 | -1.03 | 0.546 | -1.15 | 0.568 |
| 1423489_at   | monocyte to macrophage differentiation-associated                | Mmd               | -1.08 | 0.012 | -1.32 | 0.002 | -1.03 | 0.412 | -1.13 | 0.001 | -1.01 | 0.700 |

|              |                                                              |               |       |       |       |       |       |       |       |       |       |       |
|--------------|--------------------------------------------------------------|---------------|-------|-------|-------|-------|-------|-------|-------|-------|-------|-------|
| 1422456_at   | N-ethylmaleimide sensitive fusion protein                    | Nsf           | 1.01  | 0.976 | -1.32 | 0.014 | -1.05 | 0.479 | -1.08 | 0.056 | -1.12 | 0.018 |
| 1422707_at   | phosphoinositide-3-kinase, catalytic, gamma polypeptide      | Pik3cg        | -1.12 | 0.038 | -1.32 | 0.028 | 1.12  | 0.437 | 1.16  | 0.057 | 1.32  | 0.031 |
| 1417667_a_at | phosphotriesterase related                                   | Pter          | -1.07 | 0.161 | -1.32 | 0.013 | -1.11 | 0.305 | -1    | 0.937 | -1.1  | 0.073 |
| 1416524_at   | speckle-type POZ protein                                     | Spop          | -1.09 | 0.270 | -1.32 | 0.040 | -1.11 | 0.136 | -1.13 | 0.145 | -1.19 | 0.001 |
| 1460204_at   | cytoplasmic tyrosine kinase, Dscr28C related (Drosophila)    | Tec           | 1.02  | 0.754 | -1.32 | 0.003 | -1.04 | 0.396 | -1.3  | 0.027 | -1.24 | 0.090 |
| 1449405_at   | tensin 1                                                     | Tns1          | -1.04 | 0.500 | -1.32 | 0.040 | -1.53 | 0.004 | -1.42 | 0.008 | -1.46 | 0.006 |
| 1425381_a_at | transferrin receptor 2                                       | Trfr2         | -1.25 | 0.172 | -1.32 | 0.033 | 1.4   | 0.535 | -1.13 | 0.197 | 1.06  | 0.941 |
| 1435133_at   | UDP-glucose ceramide glucosyltransferase                     | Ugcg          | 1.12  | 0.406 | -1.32 | 0.019 | -1.19 | 0.087 | -1.16 | 0.084 | -1.24 | 0.006 |
| 1453343_s_at | vaccinia related kinase 2                                    | Vrk2          | -1    | 0.945 | -1.32 | 0.031 | -1.19 | 0.104 | -1.3  | 0.007 | -1.21 | 0.048 |
| 1455376_at   | RIKEN cDNA 1300010F03 gene                                   | 1300010F03Rik | 1.02  | 0.839 | -1.33 | 0.005 | -1.07 | 0.464 | -1.08 | 0.370 | 1.02  | 0.975 |
| 1455299_at   | RIKEN cDNA 1700110N18 gene                                   | 1700110N18Rik | -1.03 | 0.758 | -1.33 | 0.011 | -1.11 | 0.301 | -1.09 | 0.114 | -1.14 | 0.038 |
| 1449244_at   | cadherin 2                                                   | Cdh2          | 1     | 0.807 | -1.33 | 0.020 | -1.37 | 0.040 | -1.18 | 0.146 | -1.5  | 0.002 |
| 1425423_at   | GLIS family zinc finger 1                                    | Glis1         | -1.13 | 0.366 | -1.33 | 0.017 | -1.35 | 0.063 | -1.42 | 0.061 | -1.37 | 0.069 |
| 1455404_at   | junctophilin 2                                               | Jph2          | -1.05 | 0.450 | -1.33 | 0.003 | -1.14 | 0.117 | -1.27 | 0.006 | -1.29 | 0.174 |
| 1434395_at   | mannosidase, alpha, class 1A, member 2                       | Man1a2        | 1.16  | 0.136 | -1.33 | 0.003 | 1.02  | 0.935 | 1.1   | 0.448 | -1.05 | 0.818 |
| 1436660_at   | ribosome binding protein 1                                   | Rrbp1         | -1.18 | 0.172 | -1.33 | 0.030 | -1.17 | 0.270 | -1.21 | 0.004 | -1.4  | 0.090 |
| 1455549_at   | SEC14 and spectrin domains 1                                 | Sestd1        | -1.01 | 0.773 | -1.33 | 0.021 | -1.1  | 0.103 | -1.27 | 0.012 | -1.32 | 0.002 |
| 1418088_a_at | syntaxin 8                                                   | Sbx8          | 1.03  | 0.787 | -1.33 | 0.009 | 1.01  | 0.922 | -1.04 | 0.175 | -1.17 | 0.157 |
| 1430440_at   | RIKEN cDNA 4930442J19 gene                                   | 4930442J19Rik | 1.59  | 0.359 | -1.34 | 0.041 | -1.3  | 0.373 | -1.15 | 0.511 | 1.34  | 0.887 |
| 1455083_at   | Atpase, class VI, type 11C                                   | Atp11c        | 1.06  | 0.562 | -1.34 | 0.045 | -1.23 | 0.045 | -1.17 | 0.053 | -1.19 | 0.008 |
| 1434749_at   | cDNA sequence BC067068                                       | BC067068      | 1.28  | 0.155 | -1.34 | 0.000 | -1.17 | 0.202 | 1.04  | 0.635 | -1.06 | 0.526 |
| 1434718_at   | cullin 3                                                     | Cul3          | -1.06 | 0.442 | -1.34 | 0.012 | 1.02  | 0.960 | -1.19 | 0.178 | -1.2  | 0.035 |
| 1433995_s_at | DNA segment, Chr 16, Brigham & Women's Genetics 1543 e       | D16Bwg1543e   | -1.04 | 0.162 | -1.34 | 0.033 | -1.04 | 0.234 | -1.04 | 0.562 | -1.14 | 0.057 |
| 1438997_at   | Endoplasmic reticulum (ER) to nucleus signalling 1           | Ern1          | 1.37  | 0.898 | -1.34 | 0.010 | 1.22  | 0.957 | -1.24 | 0.340 | 1.22  | 0.801 |
| 1416760_at   | UDP-N-acetyl-alpha-D-galactosamine:polypeptide N-acetylgl    | Galnt1        | -1.05 | 0.312 | -1.34 | 0.048 | 1.05  | 0.625 | -1.06 | 0.238 | 1.02  | 0.833 |
| 1428374_at   | glucuronyl C5-epimerase                                      | Glee          | -1    | 0.800 | -1.34 | 0.010 | -1.07 | 0.316 | -1.05 | 0.512 | -1.21 | 0.045 |
| 1434158_at   | GDP-mannose 4, 6-dehydratase                                 | Gmnds         | -1.3  | 0.036 | -1.34 | 0.039 | -1.4  | 0.009 | -1.13 | 0.033 | -1.3  | 0.012 |
| 1433747_at   | leucyl/cystinyl aminopeptidase                               | Lnpep         | 1.04  | 0.394 | -1.34 | 0.036 | -1.21 | 0.073 | -1.12 | 0.105 | -1.31 | 0.010 |
| 1427809_at   | Latrophilin 3                                                | Lphn3         | 1.71  | 0.105 | -1.34 | 0.035 | -1.3  | 0.028 | 1.67  | 0.859 | 1.05  | 0.651 |
| 1427572_at   | Leucine rich repeat containing 51                            | Lrrc51        | 1.07  | 0.916 | -1.34 | 0.028 | 1.56  | 0.854 | 1.22  | 0.491 | -1.31 | 0.179 |
| 1445731_at   | Phosphatidylinositol 3-kinase, catalytic, beta polypeptide   | Pik3cb        | -1.21 | 0.255 | -1.34 | 0.046 | 1.01  | 0.954 | -1.14 | 0.166 | 1.13  | 0.504 |
| 1443029_at   | PTPRF interacting protein, binding protein 1 (Iiprin beta 1) | Ppifbp1       | -1.36 | 0.314 | -1.34 | 0.009 | -1.25 | 0.168 | 1.1   | 0.651 | -1.11 | 0.314 |
| 1416165_at   | RAB31, member RAS oncogene family                            | Rab31         | -1.06 | 0.276 | -1.34 | 0.004 | -1.09 | 0.019 | -1.14 | 0.005 | -1.19 | 0.055 |
| 1438404_at   | ring finger protein 144                                      | Rnf144        | -1.03 | 0.790 | -1.34 | 0.048 | 1.12  | 0.396 | 1.01  | 0.925 | -1.01 | 0.841 |
| 1436774_at   | Sel1 (suppressor of lin-12) 1 homolog (C. elegans)           | Sel1h         | -1.12 | 0.027 | -1.34 | 0.031 | -1.03 | 0.412 | -1.01 | 0.762 | -1.19 | 0.082 |
| 1453125_at   | SRY-box containing gene 11                                   | Sox11         | -1.2  | 0.089 | -1.34 | 0.012 | -1.26 | 0.141 | -1.05 | 0.410 | -1.04 | 0.474 |
| 1436982_at   | trinucleotide repeat containing 6b                           | Tnrc6b        | 1.03  | 0.876 | -1.34 | 0.049 | -1.09 | 0.190 | -1.23 | 0.033 | -1.29 | 0.015 |
| 1419577_at   | RIKEN cDNA A530089I17 gene                                   | A530089I17Rik | -1.11 | 0.081 | -1.35 | 0.006 | 1     | 0.967 | -1.03 | 0.571 | 1.03  | 0.765 |
| 1454708_at   | actin-binding LIM protein 1                                  | Ablim1        | -1.24 | 0.308 | -1.35 | 0.041 | -1    | 0.806 | 1.12  | 0.117 | 1.22  | 0.119 |
| 1422573_at   | AMP deaminase 3                                              | Ampd3         | -1.05 | 0.212 | -1.35 | 0.001 | -1.11 | 0.050 | -1.17 | 0.022 | -1.2  | 0.024 |
| 1449955_at   | calcium channel, voltage-dependent, alpha 1F subunit         | Cacna1f       | -1.46 | 0.116 | -1.35 | 0.026 | 1.59  | 0.261 | 1.05  | 0.771 | 1.09  | 0.827 |
| 1453372_at   | DnaJ (Hsp40) homolog, subfamily C, member 1                  | Dnajc1        | 1.05  | 0.384 | -1.35 | 0.013 | -1.38 | 0.031 | -1.2  | 0.010 | -1.51 | 0.009 |
| 1437282_at   | Dedicator of cyto-kinesis 2                                  | Dock2         | -1.52 | 0.119 | -1.35 | 0.029 | 1.16  | 0.368 | -1.56 | 0.298 | 1.51  | 0.224 |
| 1423702_at   | H1 histone family, member 0                                  | H1f0          | -1.12 | 0.085 | -1.35 | 0.022 | 1.01  | 0.770 | -1.05 | 0.367 | -1.08 | 0.094 |
| 1417379_at   | IQ motif containing GTPase activating protein 1              | Iqgap1        | -1.09 | 0.324 | -1.35 | 0.038 | -1.23 | 0.038 | -1.19 | 0.026 | -1.17 | 0.002 |
| 1433776_at   | lipoma HMGIC fusion partner                                  | Lhfp          | -1.01 | 0.728 | -1.35 | 0.002 | -1.23 | 0.000 | -1.22 | 0.037 | -1.29 | 0.005 |
| 1433842_at   | leucine rich repeat (in FLII) interacting protein 1          | Lrrfip1       | -1.04 | 0.280 | -1.35 | 0.011 | -1.26 | 0.097 | -1.25 | 0.019 | -1.34 | 0.009 |
| 1448870_at   | latent transforming growth factor beta binding protein 1     | Ltbp1         | -1.13 | 0.155 | -1.35 | 0.038 | -1.28 | 0.009 | -1.28 | 0.007 | -1.41 | 0.018 |
| 1417110_at   | mannosidase 1, alpha                                         | Man1a         | -1.09 | 0.078 | -1.35 | 0.001 | -1.33 | 0.095 | -1.17 | 0.158 | 1.04  | 0.833 |
| 1426369_at   | male sterility domain containing 2                           | Mlstd2        | -1.01 | 0.808 | -1.35 | 0.024 | -1.09 | 0.270 | -1.16 | 0.134 | -1.29 | 0.037 |
| 1451140_s_at | protein kinase, AMP-activated, gamma 2 non-catalytic subun   | Prkg2         | -1.27 | 0.082 | -1.35 | 0.045 | -1.08 | 0.261 | -1.09 | 0.038 | -1.04 | 0.112 |
| 1438470_at   | suppressor of cytokine signaling 2                           | Socs2         | 1.33  | 0.209 | -1.35 | 0.004 | 1.05  | 0.394 | -1.21 | 0.339 | -1.37 | 0.119 |
| 1435878_at   | serine/threonine kinase 38 like                              | Stk38l        | -1.07 | 0.395 | -1.35 | 0.024 | -1.24 | 0.003 | -1.29 | 0.006 | -1.11 | 0.240 |
| 1452092_at   | RIKEN cDNA 4631426J05 gene                                   | 4631426J05Rik | -1.1  | 0.767 | -1.36 | 0.004 | 1.04  | 0.677 | -1.04 | 0.373 | 1.13  | 0.661 |
| 1426392_a_at | ARP3 actin-related protein 3 homolog (yeast)                 | Actr3         | -1.27 | 0.167 | -1.36 | 0.037 | -1.09 | 0.246 | -1.12 | 0.097 | -1.15 | 0.092 |
| 1450586_at   | bradykinin receptor, beta 1                                  | Bdkrb1        | -1.24 | 0.115 | -1.36 | 0.049 | -1.07 | 0.448 | -1.22 | 0.188 | 1.07  | 0.788 |
| 1449375_at   | carboxylesterase 6                                           | Ces6          | -1.14 | 0.224 | -1.36 | 0.045 | 1.51  | 0.575 | 2.98  | 0.175 | -1.01 | 0.721 |
| 1444181_at   | GTPase, IMAP family member 5                                 | Gimap5        | -1.27 | 0.091 | -1.36 | 0.002 | 1.06  | 0.761 | -1.01 | 0.862 | -1.26 | 0.138 |

|              |                                                                                   |                   |       |       |       |       |       |       |       |       |       |       |
|--------------|-----------------------------------------------------------------------------------|-------------------|-------|-------|-------|-------|-------|-------|-------|-------|-------|-------|
| 1454851_at   | nuclear receptor subfamily 2, group C, member 2                                   | Nr2c2             | -1.13 | 0.161 | -1.36 | 0.021 | -1.22 | 0.096 | -1.36 | 0.014 | -1.3  | 0.001 |
| 1420015_s_at | palmitoyl-protein thioesterase 1                                                  | Ppt1              | -1.59 | 0.011 | -1.36 | 0.011 | 1.11  | 0.920 | -1.09 | 0.357 | 1.14  | 0.918 |
| 1451179_a_at | quaking                                                                           | Qk                | -1.04 | 0.550 | -1.36 | 0.003 | -1.2  | 0.001 | -1.27 | 0.004 | -1.26 | 0.001 |
| 1431335_a_at | WAP four-disulfide core domain 1                                                  | Wfdc1             | 1.15  | 0.922 | -1.36 | 0.034 | 1.52  | 0.619 | 1.61  | 0.690 | 1.73  | 0.184 |
| 1436161_at   | androgen-induced proliferation inhibitor                                          | Aprin             | 1.12  | 0.419 | -1.37 | 0.011 | -1.08 | 0.288 | -1.19 | 0.214 | -1.34 | 0.027 |
| 1418071_s_at | chromodomain protein, Y chromosome-like                                           | Cdyl              | -1.05 | 0.426 | -1.37 | 0.034 | -1.27 | 0.080 | -1.39 | 0.004 | -1.39 | 0.022 |
| 1423779_at   | coiled-coil-helix-coiled-coil-helix domain containing 6                           | Chchd6            | -1.11 | 0.273 | -1.37 | 0.009 | 1.03  | 0.848 | -1    | 0.868 | 1.08  | 0.524 |
| 1419353_at   | dolichol-phosphate (beta-D) mannosyltransferase 1                                 | Dpm1              | -1.02 | 0.726 | -1.37 | 0.018 | 1.32  | 0.009 | 1.09  | 0.629 | -1.13 | 0.660 |
| 1435682_at   | leucyl-tRNA synthetase, mitochondrial                                             | Lars2             | 1.05  | 0.745 | -1.37 | 0.008 | -1.3  | 0.007 | -1.15 | 0.106 | -1.05 | 0.462 |
| 1453104_at   | mitogen activated protein kinase 1                                                | Mapk1             | -1.18 | 0.242 | -1.37 | 0.048 | 1.04  | 0.039 | 1.04  | 0.263 | 1.1   | 0.068 |
| 1426382_at   | protein phosphatase 1B, magnesium dependent, beta isoform                         | Ppm1b             | -1.08 | 0.263 | -1.37 | 0.011 | -1.26 | 0.034 | -1.31 | 0.005 | -1.34 | 0.000 |
| 1452727_at   | R3H domain containing 2                                                           | R3hdm2            | -1.26 | 0.044 | -1.37 | 0.008 | -1.06 | 0.456 | -1.11 | 0.225 | -1.2  | 0.156 |
| 1417696_at   | sterol O-acyltransferase 1                                                        | Soat1             | -1.05 | 0.309 | -1.37 | 0.014 | -1.13 | 0.066 | -1.18 | 0.016 | -1.09 | 0.111 |
| 1452405_x_at | T-cell receptor alpha chain /// RIKEN cDNA A430107P09 ger                         | Tcra /// A430107P | -1.01 | 0.572 | -1.37 | 0.014 | -1.02 | 0.805 | -1.23 | 0.105 | -1.16 | 0.101 |
| 1452213_at   | testis expressed gene 2                                                           | Tex2              | 1.14  | 0.850 | -1.37 | 0.027 | -1.05 | 0.572 | -1.07 | 0.371 | -1.07 | 0.274 |
| 1456981_at   | transmembrane channel-like gene family 7                                          | Tmc7              | -1.26 | 0.107 | -1.37 | 0.045 | 1.26  | 0.069 | 1.24  | 0.167 | 1.16  | 0.303 |
| 1447908_x_at | tetratricopeptide repeat domain 3                                                 | Ttc3              | -1.57 | 0.058 | -1.37 | 0.047 | -1.05 | 0.602 | -1.33 | 0.158 | 1.09  | 0.418 |
| 1450782_at   | wingless-related MMTV integration site 4                                          | Wnt4              | -1.05 | 0.454 | -1.37 | 0.001 | -1.16 | 0.013 | 1.01  | 0.468 | -1.07 | 0.591 |
| 1428663_at   | RIKEN cDNA 5133401H06 gene                                                        | 5133401H06Rik     | -1.04 | 0.485 | -1.38 | 0.025 | 1.02  | 0.848 | -1.09 | 0.359 | -1    | 0.884 |
| 1441007_at   | RIKEN cDNA A330102I10 gene                                                        | A330102I10Rik     | -1.76 | 0.079 | -1.38 | 0.007 | 1.05  | 0.800 | -1.57 | 0.101 | 1.34  | 0.821 |
| 1454916_s_at | ADP-ribosylation factor interacting protein 1                                     | Arfp1             | 1.01  | 0.891 | -1.38 | 0.004 | -1.19 | 0.078 | -1.22 | 0.002 | -1.4  | 0.022 |
| 1452921_at   | RIKEN cDNA B130050I23 gene                                                        | B130050I23Rik     | -1.01 | 0.672 | -1.38 | 0.025 | -1.03 | 0.681 | -1.05 | 0.417 | -1.02 | 0.803 |
| 1427837_at   | Immunoglobulin kappa chain variable 32 (V32)                                      | Igk-V32           | 1.03  | 0.907 | -1.38 | 0.010 | -1.46 | 0.190 | 1.31  | 0.922 | 1.06  | 0.653 |
| 1446618_at   | hypothetical gene supported by AK038224                                           | LOC432971         | -1.14 | 0.124 | -1.38 | 0.049 | 1.11  | 0.770 | -1.15 | 0.012 | -1.1  | 0.365 |
| 1426245_s_at | microtubule-associated protein, RP/EB family, member 2                            | Mapre2            | -1.11 | 0.291 | -1.38 | 0.016 | 1.08  | 0.394 | -1.1  | 0.060 | -1.04 | 0.430 |
| 1448943_at   | neuropilin 1                                                                      | Nrp1              | 1.02  | 0.673 | -1.38 | 0.026 | -1.42 | 0.013 | -1.35 | 0.002 | -1.34 | 0.031 |
| 1444943_at   | SH3 domain containing ring finger 1                                               | Sh3rf1            | -1.19 | 0.503 | -1.38 | 0.011 | 1.41  | 0.686 | -1.28 | 0.317 | -1.49 | 0.216 |
| 1434261_at   | signal-induced proliferation-associated 1 like 2                                  | Sipa1l2           | 1.02  | 0.688 | -1.38 | 0.041 | -1.2  | 0.014 | -1.32 | 0.011 | -1.47 | 0.002 |
| 1454992_at   | solute carrier family 7 (cationic amino acid transporter, y+ sys)                 | Slc7a1            | -1.12 | 0.150 | -1.38 | 0.022 | -1.15 | 0.182 | -1.17 | 0.052 | -1.16 | 0.113 |
| 1454960_at   | MAD homolog 3 (Drosophila)                                                        | Smad3             | -1.12 | 0.305 | -1.38 | 0.010 | -1.2  | 0.031 | -1.16 | 0.081 | -1.22 | 0.092 |
| 1443354_at   | Tripartite motif-containing 59                                                    | Trim59            | 1.04  | 0.793 | -1.38 | 0.027 | 1.8   | 0.041 | -1.18 | 0.332 | 1.07  | 0.556 |
| 1419954_s_at | zinc finger, AN1-type domain 3                                                    | Zfand3            | 1.09  | 0.693 | -1.38 | 0.023 | -1.42 | 0.001 | -1.57 | 0.000 | -1.56 | 0.003 |
| 1428500_at   | RIKEN cDNA 2210419D22 gene                                                        | 2210419D22Rik     | -1.21 | 0.197 | -1.39 | 0.011 | -1.1  | 0.077 | -1.22 | 0.127 | -1.29 | 0.130 |
| 1433256_at   | RIKEN cDNA A930011E06 gene                                                        | A930011E06Rik     | 1.15  | 0.460 | -1.39 | 0.015 | 2.05  | 0.118 | 2.41  | 0.202 | 1.69  | 0.195 |
| 1456735_x_at | acid phosphatase-like 2                                                           | Acpl2             | -1.22 | 0.202 | -1.39 | 0.028 | 1     | 0.712 | -1.18 | 0.007 | 1.02  | 0.702 |
| 1434052_at   | expressed sequence AI593442                                                       | AI593442          | 1.54  | 0.426 | -1.39 | 0.044 | 1.55  | 0.053 | -1.2  | 0.343 | -1.38 | 0.083 |
| 1419922_s_at | attractin like 1                                                                  | Atrnl1            | -1.14 | 0.030 | -1.39 | 0.048 | -1.18 | 0.109 | -1.17 | 0.261 | -1.32 | 0.013 |
| 1459416_at   | B-cell CLL/lymphoma 7A                                                            | Bcl7a             | 1.44  | 0.623 | -1.39 | 0.049 | -1.14 | 0.409 | -1.14 | 0.171 | 1.69  | 0.181 |
| 1419610_at   | chemokine (C-C motif) receptor 1                                                  | Ccr1              | 1.02  | 0.839 | -1.39 | 0.045 | 1.18  | 0.965 | -1.69 | 0.134 | 2.85  | 0.544 |
| 1433808_at   | RIKEN cDNA D330001F17 gene                                                        | D330001F17Rik     | -1.18 | 0.272 | -1.39 | 0.041 | 1.05  | 0.318 | 1.02  | 0.443 | 1.13  | 0.169 |
| 1426833_at   | eukaryotic translation initiation factor 4 gamma, 3                               | Eif4g3            | -1.14 | 0.128 | -1.39 | 0.027 | -1.19 | 0.063 | -1.16 | 0.220 | -1.28 | 0.048 |
| 1416891_at   | numb gene homolog (Drosophila)                                                    | Numb              | -1.01 | 0.740 | -1.39 | 0.011 | -1.2  | 0.050 | -1.41 | 0.008 | -1.4  | 0.002 |
| 1420429_at   | protocadherin beta 3                                                              | Pcdhb3            | -1.35 | 0.107 | -1.39 | 0.030 | 2.03  | 0.961 | 1.3   | 0.367 | 1.23  | 0.534 |
| 1456389_at   | zinc finger homeobox 1b                                                           | Zfhx1b            | 1.06  | 0.363 | -1.39 | 0.029 | -1.3  | 0.015 | -1.31 | 0.075 | -1.47 | 0.022 |
| 1434192_at   | zinc finger, ZZ-type with EF hand domain 1                                        | Zzef1             | -1.05 | 0.236 | -1.39 | 0.015 | -1.2  | 0.111 | -1.44 | 0.026 | -1.48 | 0.007 |
| 1429189_at   | RIKEN cDNA 1110007C02 gene                                                        | 1110007C02Rik     | -1.17 | 0.220 | -1.4  | 0.021 | -1.02 | 0.386 | -1.02 | 0.644 | 1.04  | 0.780 |
| 1421422_at   | cDNA sequence AF397014                                                            | AF397014          | -1.01 | 0.803 | -1.4  | 0.007 | 1.02  | 0.845 | -1.03 | 0.550 | 1.66  | 0.688 |
| 1450913_at   | UDP-Gal:beta-GlcNAc beta 1,4-galactosyltransferase, polypeptide B4galT6 /// LOC67 | B4galT6 /// LOC67 | -1.02 | 0.638 | -1.4  | 0.027 | -1.23 | 0.007 | 1     | 0.836 | -1.18 | 0.366 |
| 1425262_at   | CCAAT/enhancer binding protein (C/EBP), gamma                                     | Cebpg             | -1.07 | 0.184 | -1.4  | 0.021 | -1.11 | 0.184 | -1.05 | 0.342 | -1.06 | 0.497 |
| 1418195_at   | UDP-N-acetyl-alpha-D-galactosamine:polypeptide N-acetyltransferase                | Galnt10           | -1.07 | 0.117 | -1.4  | 0.001 | -1.13 | 0.037 | -1.07 | 0.255 | -1.04 | 0.554 |
| 1418664_at   | multiple PDZ domain protein                                                       | Mpdz              | -1.08 | 0.341 | -1.4  | 0.031 | -1.15 | 0.168 | -1.17 | 0.055 | -1.29 | 0.046 |
| 1451405_at   | propionyl-Coenzyme A carboxylase, alpha polypeptide                               | Pcca              | 1.04  | 0.760 | -1.4  | 0.031 | -1.16 | 0.004 | -1.15 | 0.073 | -1.28 | 0.051 |
| 1433648_at   | sperm associated antigen 9                                                        | Spag9             | 1.08  | 0.400 | -1.4  | 0.049 | -1.34 | 0.002 | -1.22 | 0.021 | -1.36 | 0.006 |
| 1459666_at   | trafficking protein, kinesin binding 1                                            | Trak1             | -1.26 | 0.096 | -1.4  | 0.005 | -1.36 | 0.020 | -1.22 | 0.046 | -1.4  | 0.044 |
| 1416156_at   | vinculin                                                                          | Vcl               | -1.05 | 0.137 | -1.4  | 0.008 | -1.17 | 0.015 | -1.19 | 0.001 | -1.2  | 0.001 |
| 1455588_at   | cDNA sequence BC034664                                                            | BC034664          | 1.13  | 0.265 | -1.41 | 0.004 | -1.06 | 0.449 | -1.18 | 0.070 | -1.21 | 0.119 |
| 1423966_at   | Cd99 antigen-like 2                                                               | Cd99l2            | -1.25 | 0.003 | -1.41 | 0.010 | -1.1  | 0.541 | 1.03  | 0.844 | -1.17 | 0.065 |
| 1451289_at   | doublecortin and calcium/calmodulin-dependent protein kinase                      | Dcamk1            | 1.04  | 0.721 | -1.41 | 0.036 | -1.1  | 0.218 | -1.11 | 0.265 | -1.07 | 0.283 |

|              |                                                                         |               |       |       |       |       |       |       |       |       |       |       |
|--------------|-------------------------------------------------------------------------|---------------|-------|-------|-------|-------|-------|-------|-------|-------|-------|-------|
| 1428622_at   | DEP domain containing 6                                                 | Depdc6        | 1.06  | 0.539 | -1.41 | 0.005 | 1     | 0.966 | -1.26 | 0.191 | 1.04  | 0.999 |
| 1434754_at   | GTPase activating RANGAP domain-like 4                                  | Garnl4        | -1.14 | 0.012 | -1.41 | 0.009 | -1.26 | 0.014 | -1.29 | 0.011 | -1.55 | 0.005 |
| 1435967_s_at | 3-hydroxyisobutyrate dehydrogenase                                      | Hibadh        | -1.18 | 0.021 | -1.41 | 0.008 | -1.06 | 0.519 | -1.06 | 0.107 | 1     | 0.904 |
| 1449071_at   | myosin, light polypeptide 7, regulatory                                 | My17          | 1.91  | 0.261 | -1.41 | 0.035 | 1.02  | 0.709 | 1.26  | 0.484 | -1.35 | 0.207 |
| 1423990_at   | RAB28, member RAS oncogene family                                       | Rab28         | -1.02 | 0.506 | -1.41 | 0.005 | -1.1  | 0.045 | -1.16 | 0.106 | -1.21 | 0.003 |
| 1457097_at   | src family associated phosphoprotein 2                                  | Scap2         | -1.37 | 0.216 | -1.41 | 0.025 | -1.06 | 0.618 | -1.1  | 0.495 | -1.51 | 0.044 |
| 1438087_at   | thiopurine methyltransferase                                            | Tpmt          | 1.11  | 0.934 | -1.41 | 0.039 | -1.11 | 0.323 | -1.16 | 0.489 | -1.09 | 0.576 |
| 1455180_at   | expressed sequence AA407270                                             | AA407270      | -1.22 | 0.111 | -1.42 | 0.041 | -1.04 | 0.386 | 1.11  | 0.483 | 1.48  | 0.183 |
| 1453199_at   | acyl-Coenzyme A binding domain containing 6                             | Acbd6         | -1.02 | 0.710 | -1.42 | 0.008 | -1.14 | 0.318 | -1.15 | 0.245 | -1.07 | 0.412 |
| 1436633_at   | BAH domain and coiled-coil containing 1                                 | Bahcc1        | -1.06 | 0.676 | -1.42 | 0.003 | -1.29 | 0.021 | 1.08  | 0.595 | 1.05  | 0.538 |
| 1423891_at   | glutathione S-transferase, theta 3                                      | Gstt3         | -1.21 | 0.133 | -1.42 | 0.012 | 1.08  | 0.993 | -1.12 | 0.349 | 1.64  | 0.551 |
| 1451783_a_at | kinesin-associated protein 3                                            | Kifap3        | -1.13 | 0.263 | -1.42 | 0.046 | -1.1  | 0.078 | -1.2  | 0.025 | -1.11 | 0.033 |
| 1436766_at   | LUC7-like 2 (S. cerevisiae)                                             | Luc7l2        | -1.05 | 0.595 | -1.42 | 0.048 | -1.21 | 0.209 | -1.06 | 0.555 | -1.39 | 0.093 |
| 1460202_at   | myozenin 1                                                              | Myoz1         | 1.16  | 0.687 | -1.42 | 0.037 | 1.03  | 0.991 | -1.18 | 0.148 | 1.56  | 0.350 |
| 1427299_at   | ribosomal protein S6 kinase polypeptide 3                               | Rps6ka3       | -1.05 | 0.287 | -1.42 | 0.011 | -1.37 | 0.010 | -1.29 | 0.039 | -1.42 | 0.005 |
| 1431098_at   | restin (Reed-Steinberg cell-expressed intermediate filament- $\alpha$ ) | Rsn           | -1.08 | 0.529 | -1.42 | 0.023 | 1.09  | 0.896 | 1.02  | 0.836 | -1.17 | 0.481 |
| 1428929_s_at | solute carrier family 25 (mitochondrial carrier, phosphate carr         | Slc25a26      | -1.1  | 0.527 | -1.42 | 0.018 | -1.06 | 0.677 | -1.22 | 0.045 | -1.09 | 0.464 |
| 1428070_at   | synovial apoptosis inhibitor 1, synoviolin                              | Synn1         | -1.23 | 0.082 | -1.42 | 0.033 | -1.05 | 0.467 | -1.03 | 0.668 | -1.01 | 0.843 |
| 1447070_at   | Williams-Beuren syndrome chromosome region 1 homolog (t                 | Wbscr1        | -1.18 | 0.213 | -1.42 | 0.007 | -1.02 | 0.862 | 1.06  | 0.518 | 1.02  | 0.973 |
| 1448611_at   | WW, C2 and coiled-coil domain containing 2                              | Wwc2          | -1    | 0.839 | -1.42 | 0.007 | -1.31 | 0.031 | -1.63 | 0.031 | -1.69 | 0.031 |
| 1448857_a_at | zinc finger, DHHC domain containing 12                                  | Zdhhc12       | -1    | 0.914 | -1.42 | 0.009 | 1.01  | 0.976 | -1.01 | 0.750 | 1.11  | 0.905 |
| 1441338_at   | RIKEN cDNA 5930412G12 gene                                              | 5930412G12Rik | -1.11 | 0.587 | -1.43 | 0.001 | 1.19  | 0.366 | 1.12  | 0.908 | 1.14  | 0.354 |
| 1433324_at   | RIKEN cDNA 9330154F10 gene                                              | 9330154F10Rik | 1.07  | 0.796 | -1.43 | 0.046 | 1.66  | 0.121 | 1.2   | 0.882 | -1.08 | 0.445 |
| 1455703_at   | thymoma viral proto-oncogene 2                                          | Akt2          | -1.07 | 0.167 | -1.43 | 0.045 | 1.75  | 0.305 | 1.18  | 0.336 | 1.94  | 0.817 |
| 1429535_at   | armadillo repeat containing 8                                           | Armc8         | -1.01 | 0.839 | -1.43 | 0.007 | -1.03 | 0.705 | -1.24 | 0.005 | -1.19 | 0.083 |
| 1428774_at   | glypican 6                                                              | Gpc6          | -1.15 | 0.095 | -1.43 | 0.036 | -1.22 | 0.012 | -1.27 | 0.054 | -1.29 | 0.008 |
| 1433605_at   | inositol polyphosphate-5-phosphatase A                                  | Inpp5a        | -1.08 | 0.409 | -1.43 | 0.015 | -1.23 | 0.000 | -1.25 | 0.001 | -1.31 | 0.021 |
| 1429661_at   | Rho-related BTB domain containing 3                                     | Rhobtb3       | -1.21 | 0.010 | -1.43 | 0.042 | -1.06 | 0.584 | -1.06 | 0.082 | -1.03 | 0.769 |
| 1441926_x_at | transmembrane inner ear                                                 | Tmie          | 1.15  | 0.335 | -1.43 | 0.021 | 2.32  | 0.448 | 1.4   | 0.785 | 1.22  | 0.021 |
| 1456992_at   | ubiquitin protein ligase E3C                                            | Ube3c         | 1.29  | 0.305 | -1.43 | 0.008 | 1.14  | 0.489 | 2.17  | 0.280 | 1.37  | 0.439 |
| 1439025_at   | zinc finger protein 446                                                 | Zfp446        | -1.47 | 0.099 | -1.43 | 0.010 | 1.11  | 0.693 | -1.18 | 0.062 | -1.06 | 0.715 |
| 1429185_at   | RIKEN cDNA 4631416L12 gene                                              | 4631416L12Rik | 1.13  | 0.720 | -1.44 | 0.038 | 1.22  | 0.784 | 1.3   | 0.140 | 1.95  | 0.413 |
| 1449895_at   | preproacrosin                                                           | Acr           | -1.24 | 0.489 | -1.44 | 0.030 | 1.65  | 0.247 | -1.32 | 0.199 | 1.66  | 0.110 |
| 1429095_at   | centromere protein P                                                    | Cenpp         | -1.03 | 0.756 | -1.44 | 0.030 | -1.03 | 0.811 | 1.09  | 0.739 | 1.18  | 0.198 |
| 1419703_at   | procollagen, type V, alpha 3                                            | Col5a3        | -1.02 | 0.716 | -1.44 | 0.046 | -1.15 | 0.054 | -1.05 | 0.404 | -1.12 | 0.050 |
| 1448892_at   | dedicator of cytokinesis 7                                              | Dock7         | -1.05 | 0.118 | -1.44 | 0.001 | -1.08 | 0.068 | -1.21 | 0.065 | -1.24 | 0.002 |
| 1450861_at   | Fanconi anemia, complementation group C                                 | Fancc         | -1.1  | 0.455 | -1.44 | 0.002 | -1.11 | 0.278 | -1.21 | 0.160 | -1.21 | 0.510 |
| 1437001_at   | glycogen synthase kinase 3 beta                                         | Gsk3b         | -1.07 | 0.459 | -1.44 | 0.005 | -1.55 | 0.010 | -1.66 | 0.003 | -1.48 | 0.007 |
| 1418349_at   | heparin-binding EGF-like growth factor                                  | Hbegf         | -1.05 | 0.581 | -1.44 | 0.006 | -1.22 | 0.029 | -1.33 | 0.036 | -1.22 | 0.025 |
| 1437406_x_at | insulin-like growth factor binding protein 4                            | Igfbp4        | -1.26 | 0.104 | -1.44 | 0.030 | 1.06  | 0.677 | -1.12 | 0.195 | 1.06  | 0.942 |
| 1422706_at   | similar to Nedd4 WW binding protein 4                                   | LOC637870     | -1.1  | 0.144 | -1.44 | 0.004 | -1.14 | 0.047 | -1.23 | 0.004 | -1.16 | 0.030 |
| 1438422_at   | leucine rich repeat containing 20                                       | Lrrc20        | 1.04  | 0.600 | -1.44 | 0.008 | -1.09 | 0.619 | 1.08  | 0.730 | -1.19 | 0.111 |
| 1437722_x_at | Poly(rC) binding protein 3                                              | Pcbp3         | -1.27 | 0.326 | -1.44 | 0.041 | -1.17 | 0.311 | 1.14  | 0.431 | -1.18 | 0.325 |
| 1430033_at   | RIKEN cDNA 5330431K02 gene                                              | 5330431K02Rik | -1.25 | 0.086 | -1.45 | 0.020 | -1.23 | 0.185 | 1.9   | 0.120 | -1.3  | 0.229 |
| 1446677_at   | RIKEN cDNA A830029E22 gene                                              | A830029E22Rik | -1.1  | 0.636 | -1.45 | 0.012 | 1.06  | 0.887 | -1    | 0.822 | 1.03  | 0.959 |
| 1458832_at   | Growth hormone receptor                                                 | Ghr           | -1.1  | 0.402 | -1.45 | 0.008 | -1.23 | 0.279 | -1.74 | 0.016 | -1.78 | 0.099 |
| 1449407_at   | intraflagellar transport 81 homolog (Chlamydomonas)                     | Ift81         | 1.07  | 0.576 | -1.45 | 0.033 | 1.01  | 0.949 | -1.1  | 0.333 | -1.1  | 0.254 |
| 1418932_at   | nuclear factor, interleukin 3, regulated                                | Nfil3         | -1.09 | 0.316 | -1.45 | 0.021 | -1.18 | 0.331 | 1.01  | 0.856 | -1.18 | 0.379 |
| 1429514_at   | phosphatidic acid phosphatase type 2B                                   | Ppap2b        | 1.01  | 0.882 | -1.45 | 0.010 | -1.14 | 0.085 | -1.27 | 0.023 | -1.25 | 0.037 |
| 1415850_at   | RAS p21 protein activator 3                                             | Rasa3         | 1.04  | 0.391 | -1.45 | 0.004 | -1.09 | 0.244 | -1.18 | 0.020 | -1.28 | 0.015 |
| 1444089_at   | spectrin beta 2                                                         | Spnb2         | -1.11 | 0.265 | -1.45 | 0.010 | -1.37 | 0.101 | -1.15 | 0.145 | -1.45 | 0.005 |
| 1448939_at   | ubiquitin specific peptidase 25                                         | Usp25         | -1.07 | 0.527 | -1.45 | 0.024 | -1.29 | 0.014 | -1.29 | 0.095 | -1.2  | 0.322 |
| 1436217_at   | zinc finger protein 148                                                 | Zfp148        | -1.1  | 0.300 | -1.45 | 0.028 | 1.1   | 0.809 | 1.17  | 0.260 | -1.4  | 0.051 |
| 1420681_at   | RIKEN cDNA 1700120K04 gene                                              | 1700120K04Rik | -1.78 | 0.123 | -1.46 | 0.013 | 1.08  | 0.606 | 1.07  | 0.910 | 1.25  | 0.516 |
| 1433173_at   | RIKEN cDNA 5430440L12 gene                                              | 5430440L12Rik | 1.13  | 0.888 | -1.46 | 0.030 | -1.06 | 0.370 | -1.1  | 0.535 | 1.08  | 0.387 |
| 1434197_at   | attractin                                                               | Atrn          | 1.14  | 0.239 | -1.46 | 0.027 | -1.17 | 0.004 | -1.39 | 0.033 | -1.26 | 0.179 |
| 1435480_at   | Braf transforming gene                                                  | Braf          | -1.02 | 0.889 | -1.46 | 0.026 | -1.22 | 0.163 | -1.2  | 0.133 | -1.65 | 0.031 |
| 1456116_at   | catenin (cadherin associated protein), delta 2                          | Ctnd2         | -1.14 | 0.437 | -1.46 | 0.036 | -1.19 | 0.482 | -1.06 | 0.597 | -1.19 | 0.368 |

|              |                                                                               |                   |       |       |       |       |       |       |       |       |       |       |
|--------------|-------------------------------------------------------------------------------|-------------------|-------|-------|-------|-------|-------|-------|-------|-------|-------|-------|
| 1418944_at   | cysteinyl leukotriene receptor 1                                              | Cysl1r1           | -1.59 | 0.055 | -1.46 | 0.035 | 2.03  | 0.023 | 1.19  | 0.859 | 1.8   | 0.335 |
| 1450477_at   | 5-hydroxytryptamine (serotonin) receptor 2C                                   | Htr2c             | 1     | 0.934 | -1.46 | 0.046 | 1.73  | 0.163 | 1.43  | 0.249 | 1.39  | 0.692 |
| 1428005_at   | MOCO sulphurase C-terminal domain containing 1                                | Mosc1             | -1.1  | 0.504 | -1.46 | 0.049 | 1.21  | 0.272 | 1.01  | 0.993 | 1.87  | 0.734 |
| 1418892_at   | ras homolog gene family, member J                                             | Rhoj              | 1.03  | 0.973 | -1.46 | 0.025 | -1.36 | 0.036 | -1.23 | 0.018 | -1.13 | 0.225 |
| 1456153_at   | slingshot homolog 2 (Drosophila)                                              | Ssh2              | 1.21  | 0.251 | -1.46 | 0.012 | -1.3  | 0.002 | -1.26 | 0.087 | -1.62 | 0.007 |
| 1459737_s_at | transthyretin                                                                 | Ttr               | -1.16 | 0.413 | -1.46 | 0.001 | -1.01 | 0.516 | 1.61  | 0.263 | 1.61  | 0.891 |
| 1437155_a_at | WW domain containing transcription regulator 1                                | Wwtr1             | -1.05 | 0.470 | -1.46 | 0.005 | -1.38 | 0.007 | -1.35 | 0.023 | -1.25 | 0.001 |
| 1457173_at   | Tyrosine 3-monooxygenase/tryptophan 5-monooxygenase                           | Ywhae             | -1.02 | 0.626 | -1.46 | 0.030 | -1.12 | 0.391 | 1.26  | 0.774 | -1.64 | 0.120 |
| 1429556_at   | RIKEN cDNA 2610024B07 gene                                                    | 2610024B07Rik     | -1.01 | 0.892 | -1.47 | 0.030 | -1.46 | 0.030 | -1.52 | 0.052 | -1.71 | 0.012 |
| 1431496_at   | RIKEN cDNA B230104F01 gene                                                    | B230104F01Rik     | -1.03 | 0.697 | -1.47 | 0.009 | 1.16  | 0.368 | 1.14  | 0.686 | 1.35  | 0.015 |
| 1417403_at   | ELOVL family member 6, elongation of long chain fatty acids                   | Elov6             | -1.03 | 0.883 | -1.47 | 0.038 | 1.05  | 0.455 | 1.09  | 0.317 | 1.08  | 0.608 |
| 1425891_a_at | GH regulated TBC protein 1                                                    | Grt1              | -1.18 | 0.409 | -1.47 | 0.029 | 1.97  | 0.453 | -1.46 | 0.165 | 3.21  | 0.242 |
| 1422465_a_at | nucleoredoxin                                                                 | Nxn               | -1.02 | 0.832 | -1.47 | 0.016 | -1.27 | 0.015 | -1.25 | 0.001 | -1.36 | 0.019 |
| 1456214_at   | protocadherin 7                                                               | Pcdh7             | 1.03  | 0.603 | -1.47 | 0.021 | -1.81 | 0.015 | -1.71 | 0.019 | -2.25 | 0.150 |
| 1418036_at   | DNA primase, p58 subunit                                                      | Prim2             | 1.02  | 0.738 | -1.47 | 0.005 | -1.1  | 0.249 | -1.22 | 0.042 | -1.37 | 0.005 |
| 1426775_s_at | secretory carrier membrane protein 1                                          | Scamp1            | -1.12 | 0.253 | -1.47 | 0.010 | -1.01 | 0.455 | -1.12 | 0.118 | -1.27 | 0.055 |
| 1436376_s_at | S1 RNA binding domain 1                                                       | Srbd1             | 1.06  | 0.777 | -1.47 | 0.012 | -1.08 | 0.310 | -1.32 | 0.064 | -1.14 | 0.352 |
| 1446771_at   | Tubulin, alpha 8                                                              | Tuba8             | -1.22 | 0.384 | -1.47 | 0.010 | 1.02  | 0.853 | 1.2   | 0.111 | 1.1   | 0.317 |
| 1460626_at   | septin 11                                                                     | 11-Sep            | -1.02 | 1.000 | -1.48 | 0.004 | -1.1  | 0.466 | -1.18 | 0.045 | -1.18 | 0.052 |
| 1436921_at   | ATPase, Cu++ transporting, alpha polypeptide                                  | Atp7a             | -1.25 | 0.114 | -1.48 | 0.011 | 1.04  | 0.894 | -1.11 | 0.033 | -1.2  | 0.013 |
| 1458862_at   | expressed sequence C78704                                                     | C78704            | -1.27 | 0.262 | -1.48 | 0.023 | 1.64  | 0.268 | 1.16  | 0.810 | -1.1  | 0.683 |
| 1435342_at   | potassium inwardly-rectifying channel, subfamily K, member K                  | Kcnk6             | -1.29 | 0.090 | -1.48 | 0.037 | 1.03  | 0.536 | 1.34  | 0.082 | 1.4   | 0.105 |
| 1417324_at   | microtubule associated serine/threonine kinase 2                              | Mast2             | 1.01  | 0.920 | -1.48 | 0.002 | -1.3  | 0.009 | -1.21 | 0.003 | -1.33 | 0.004 |
| 1427040_at   | MyoD family inhibitor domain containing                                       | Mdfic             | -1.04 | 0.347 | -1.48 | 0.026 | -1.16 | 0.018 | -1.15 | 0.003 | -1.18 | 0.009 |
| 1423201_at   | nuclear receptor co-repressor 1                                               | Ncor1             | -1.13 | 0.234 | -1.48 | 0.004 | -1.5  | 0.033 | -1.47 | 0.001 | -1.39 | 0.055 |
| 1416297_s_at | pancreatitis-associated protein                                               | Pap               | -1.6  | 0.154 | -1.48 | 0.017 | 1.18  | 0.921 | 1.51  | 0.770 | 1.21  | 0.688 |
| 1455284_x_at | phosphatidylinositol glycan anchor biosynthesis, class X                      | Pigx              | -1.46 | 0.058 | -1.48 | 0.031 | -1.13 | 0.246 | -1.05 | 0.302 | 1.29  | 0.406 |
| 1435771_at   | phospholipase C, beta 4                                                       | Plcb4             | -1.02 | 0.735 | -1.48 | 0.011 | -1.22 | 0.075 | -1.33 | 0.065 | -1.38 | 0.063 |
| 1424810_at   | taspase, threonine aspartase 1                                                | Tasp1             | -1.14 | 0.354 | -1.48 | 0.049 | -1.1  | 0.142 | -1.03 | 0.698 | -1.07 | 0.471 |
| 1428336_at   | 1-acylglycerol-3-phosphate O-acyltransferase 1 (lysophosphatidyl transferase) | Agpat4            | -1.1  | 0.335 | -1.49 | 0.009 | -1.25 | 0.033 | -1.17 | 0.010 | -1.29 | 0.001 |
| 1434310_at   | bone morphogenic protein receptor, type II (serine/threonine)                 | Bmpr2             | -1.04 | 0.375 | -1.49 | 0.014 | -1.25 | 0.013 | -1.18 | 0.127 | -1.44 | 0.005 |
| 1416772_at   | carnitine palmitoyltransferase 2                                              | Cpt2              | -1.52 | 0.019 | -1.49 | 0.008 | 1.2   | 0.491 | -1.12 | 0.245 | 1.33  | 0.519 |
| 1448665_at   | dystrophin, muscular dystrophy                                                | Dmd               | -1.02 | 0.519 | -1.49 | 0.028 | -1.33 | 0.015 | -1.45 | 0.039 | -1.39 | 0.019 |
| 1441409_at   | Grp94 neighboring nucleotidase variant 4                                      | Gnn               | 1.04  | 0.928 | -1.49 | 0.015 | -1.2  | 0.399 | 1.21  | 0.531 | -1.28 | 0.226 |
| 1422742_at   | human immunodeficiency virus type I enhancer binding protein                  | Hivep1            | -1.14 | 0.273 | -1.49 | 0.041 | -1.08 | 0.395 | -1.41 | 0.022 | -1.22 | 0.205 |
| 1457809_at   | p300/CBP-associated factor /// similar to p300/CBP-associated factor 1        | Pcaf /// LOC33012 | 1.22  | 0.779 | -1.49 | 0.028 | 1     | 0.984 | 1.31  | 0.689 | 1.8   | 0.693 |
| 1418390_at   | PHD finger protein 21A                                                        | Phf21a            | -1.08 | 0.374 | -1.49 | 0.040 | -1.16 | 0.245 | -1.57 | 0.007 | -1.42 | 0.046 |
| 1446057_at   | rearranged L-myc fusion sequence                                              | Rlf               | -1.2  | 0.449 | -1.49 | 0.046 | 1.13  | 0.915 | 1.38  | 0.375 | -1.08 | 0.520 |
| 1424089_a_at | transcription factor 4                                                        | Tcf4              | 1.05  | 0.260 | -1.49 | 0.036 | -1.31 | 0.026 | -1.3  | 0.023 | -1.54 | 0.024 |
| 1434603_at   | thyroid hormone receptor associated protein 2                                 | Thrap2            | 1.03  | 0.170 | -1.49 | 0.000 | -1.55 | 0.024 | -1.64 | 0.014 | -2.04 | 0.025 |
| 1433404_at   | RIKEN cDNA 4930423O20 gene                                                    | 4930423O20Rik     | -1.25 | 0.194 | -1.5  | 0.030 | 1.31  | 0.720 | -1.02 | 0.678 | 1.31  | 0.507 |
| 1429691_at   | RIKEN cDNA 5430405N12 gene                                                    | 5430405N12Rik     | 1.17  | 0.640 | -1.5  | 0.027 | -1.62 | 0.027 | -1.25 | 0.000 | -1.57 | 0.211 |
| 1454983_at   | expressed sequence AI465301                                                   | AI465301          | -1.1  | 0.559 | -1.5  | 0.034 | 1.02  | 0.766 | -1.03 | 0.772 | 1.18  | 0.161 |
| 1456021_at   | activating transcription factor 6                                             | Atf6              | 1.15  | 0.680 | -1.5  | 0.046 | -1.37 | 0.013 | -1.28 | 0.133 | -1.79 | 0.005 |
| 1438354_x_at | Calponin 3, acidic                                                            | Cnn3              | -1.37 | 0.261 | -1.5  | 0.025 | -1.02 | 0.911 | -1.12 | 0.162 | -1.02 | 0.757 |
| 1455627_at   | procollagen, type VIII, alpha 1                                               | Col8a1            | -1.1  | 0.228 | -1.5  | 0.018 | -1.2  | 0.084 | -1.17 | 0.032 | -1.24 | 0.036 |
| 1454965_at   | RIKEN cDNA D430039N05 gene                                                    | D430039N05Rik     | -1.11 | 0.321 | -1.5  | 0.049 | 1.08  | 0.496 | 1.02  | 0.846 | -1.02 | 0.596 |
| 1418285_at   | ephrin B1                                                                     | Efnb1             | -1.33 | 0.061 | -1.5  | 0.010 | -1.42 | 0.019 | -1.28 | 0.002 | -1.11 | 0.115 |
| 1449439_at   | Kruppel-like factor 7 (ubiquitous)                                            | Klf7              | -1.11 | 0.187 | -1.5  | 0.041 | -1.47 | 0.008 | -1.51 | 0.026 | -1.51 | 0.046 |
| 1449099_at   | LPS-responsive beige-like anchor                                              | Lrba              | -1.14 | 0.097 | -1.5  | 0.013 | -1.21 | 0.075 | -1.34 | 0.014 | -1.32 | 0.065 |
| 1458182_at   | RNA binding motif protein 18                                                  | Rbm18             | -1.18 | 0.267 | -1.5  | 0.037 | 1.15  | 0.342 | -1.05 | 0.518 | -1.26 | 0.037 |
| 1453174_at   | RIKEN cDNA 2310076G13 gene                                                    | 2310076G13Rik     | -1    | 0.844 | -1.51 | 0.000 | -1.27 | 0.107 | -1.27 | 0.057 | -1.5  | 0.039 |
| 1434375_at   | RIKEN cDNA B930006L02 gene                                                    | B930006L02Rik     | -1.03 | 0.434 | -1.51 | 0.008 | -1.16 | 0.078 | -1.21 | 0.122 | -1.18 | 0.123 |
| 1436029_at   | bicaudal C homolog 1 (Drosophila)                                             | Bicc1             | -1    | 0.945 | -1.51 | 0.007 | -1.16 | 0.330 | -1.19 | 0.018 | -1.24 | 0.005 |
| 1427974_s_at | calcium channel, voltage-dependent, L type, alpha 1D subunit                  | Cacna1d           | -1.24 | 0.284 | -1.51 | 0.049 | 1.21  | 0.983 | -1.5  | 0.058 | -1.33 | 0.358 |
| 1424770_at   | caldesmon 1                                                                   | Cald1             | -1.18 | 0.327 | -1.51 | 0.043 | -1.42 | 0.036 | -1.15 | 0.077 | -1.31 | 0.001 |
| 1446105_at   | exocyst complex component 1                                                   | Exoc1             | 3     | 0.002 | -1.51 | 0.008 | 1.85  | 0.194 | -1.3  | 0.382 | 2.42  | 0.019 |
| 1445534_at   | Filamin, beta                                                                 | Flnb              | -1.11 | 0.277 | -1.51 | 0.033 | -2.03 | 0.045 | -1.77 | 0.006 | -2.31 | 0.001 |

|              |                                                                  |                  |       |       |       |       |       |       |       |       |       |       |
|--------------|------------------------------------------------------------------|------------------|-------|-------|-------|-------|-------|-------|-------|-------|-------|-------|
| 1439030_at   | GDP-mannose pyrophosphorylase B                                  | Gmppb            | -1.11 | 0.270 | -1.51 | 0.019 | -1.08 | 0.020 | -1.11 | 0.116 | -1.23 | 0.004 |
| 1443546_at   | High density lipoprotein (HDL) binding protein                   | Hdlbp            | -1.17 | 0.230 | -1.51 | 0.004 | -1.05 | 0.602 | -1.21 | 0.080 | 1     | 0.607 |
| 1436218_at   | similar to leucine-rich repeat-containing G protein-coupled re   | LOC676300        | -1.19 | 0.125 | -1.51 | 0.035 | -1.16 | 0.210 | -1.16 | 0.138 | -1.17 | 0.171 |
| 1436193_at   | mannosidase, alpha, class 1C, member 1                           | Man1c1           | -1.04 | 0.199 | -1.51 | 0.001 | -1.2  | 0.124 | -1.08 | 0.180 | -1.42 | 0.062 |
| 1435970_at   | nemo like kinase                                                 | Nlk              | -1.15 | 0.193 | -1.51 | 0.017 | -1.43 | 0.016 | -1.49 | 0.009 | -1.56 | 0.010 |
| 1429783_at   | PDZ and LIM domain 5                                             | Pdlim5           | -1.3  | 0.170 | -1.51 | 0.040 | -1.84 | 0.005 | -1.89 | 0.000 | -1.95 | 0.046 |
| 1443408_at   | Polo-like kinase 1 (Drosophila)                                  | Plk1             | -1.11 | 0.455 | -1.51 | 0.023 | 1.2   | 0.875 | -1.08 | 0.464 | 1.2   | 0.579 |
| 1436272_at   | RAB3 GTPase activating protein subunit 2                         | Rab3gap2         | -1.2  | 0.011 | -1.51 | 0.003 | 1.01  | 0.889 | -1.08 | 0.551 | -1.27 | 0.030 |
| 1420919_at   | serum/glucocorticoid regulated kinase 3                          | Sgk3             | -1.01 | 0.763 | -1.51 | 0.014 | -1.03 | 0.545 | 1.13  | 0.724 | -1    | 0.620 |
| 1443005_at   | zinc finger homeobox 1a                                          | Zfhx1a           | -1.24 | 0.029 | -1.51 | 0.031 | -1.29 | 0.041 | -1.33 | 0.117 | 1.04  | 0.912 |
| 1456108_x_at | zinc finger protein 179                                          | Zfp179           | -1.85 | 0.128 | -1.51 | 0.048 | 1.03  | 0.915 | 1.48  | 0.403 | 1.35  | 0.192 |
| 1427187_at   | RIKEN cDNA 6030413G23 gene                                       | 6030413G23Rik    | -1.22 | 0.040 | -1.52 | 0.042 | 1.03  | 0.879 | 1.1   | 0.479 | 1.82  | 0.032 |
| 1426733_at   | inositol 1,3,4-triphosphate 5/6 kinase                           | Itpk1            | -1.17 | 0.243 | -1.52 | 0.012 | -1    | 0.992 | -1.06 | 0.554 | 1.07  | 0.544 |
| 1447084_at   | nuclear factor of activated T-cells, cytoplasmic, calcineurin-de | Nfatc1           | -1.41 | 0.222 | -1.52 | 0.022 | -1.25 | 0.165 | 1.07  | 0.952 | -1.57 | 0.031 |
| 1423405_at   | tissue inhibitor of metalloproteinase 4                          | Timp4            | 1.15  | 0.962 | -1.52 | 0.029 | 1.66  | 0.343 | 1.82  | 0.160 | 2.06  | 0.364 |
| 1425747_at   | RIKEN cDNA 1110060D06 gene /// dedicator of cytokinesis 5        | 1110060D06Rik // | -1.21 | 0.015 | -1.53 | 0.002 | -1.48 | 0.065 | -1.52 | 0.003 | -1.75 | 0.001 |
| 1458369_at   | RIKEN cDNA 2310050B05 gene                                       | 2310050B05Rik    | -1.11 | 0.570 | -1.53 | 0.028 | 1.2   | 0.530 | 1.05  | 0.194 | -1.02 | 0.601 |
| 1454599_at   | RIKEN cDNA 4930425F17 gene                                       | 4930425F17Rik    | -1.21 | 0.277 | -1.53 | 0.028 | 2.08  | 0.179 | 1.27  | 0.836 | 1.46  | 0.293 |
| 1443665_at   | Expressed sequence AI852444                                      | AI852444         | -1.07 | 0.549 | -1.53 | 0.049 | 1.1   | 0.191 | -1.27 | 0.131 | -1.27 | 0.034 |
| 1436380_at   | Cdc42 binding protein kinase alpha                               | Cdc42bpa         | 1.13  | 0.236 | -1.53 | 0.039 | -1.83 | 0.021 | -1.74 | 0.005 | -1.62 | 0.026 |
| 1445774_at   | Potassium large conductance calcium-activated channel, sub       | Kcma1            | -1.09 | 0.542 | -1.53 | 0.020 | 1.24  | 0.928 | -1.05 | 0.687 | -1.27 | 0.327 |
| 1451336_at   | lectin, galactose binding, soluble 4                             | Lgals4           | -1.01 | 0.819 | -1.53 | 0.004 | 2.06  | 0.436 | -1.07 | 0.497 | 1.1   | 0.856 |
| 1417284_at   | mitogen-activated protein kinase associated protein 1            | Mapkap1          | -1.03 | 0.679 | -1.53 | 0.008 | -1.27 | 0.137 | -1.31 | 0.166 | -1.33 | 0.016 |
| 1449975_x_at | parkin                                                           | Park2            | -1.2  | 0.261 | -1.53 | 0.022 | 2.55  | -1.19 | -1.35 | 0.228 | -1.43 | 0.227 |
| 1442060_at   | prolyl endopeptidase-like                                        | Prepl            | -1.17 | 0.585 | -1.53 | 0.023 | 1.59  | 0.702 | 1.06  | 0.708 | 1.08  | 0.284 |
| 1434005_at   | RNA binding motif, single stranded interacting protein 1         | Rbms1            | -1.01 | 0.888 | -1.53 | 0.001 | -1.37 | 0.002 | -1.49 | 0.003 | -1.58 | 0.005 |
| 1434902_at   | ring finger protein 157                                          | Rnf157           | 1.08  | 0.702 | -1.53 | 0.048 | 1.03  | 0.965 | -1.01 | 0.909 | 1.17  | 0.235 |
| 1457689_at   | SET binding factor 2                                             | Sbf2             | -1.18 | 0.469 | -1.53 | 0.022 | 2.34  | 0.431 | -1.22 | 0.459 | 1.76  | 0.921 |
| 1449865_at   | sema domain, immunoglobulin domain (Ig), short basic doma        | Sema3a           | 1.23  | 0.725 | -1.53 | 0.043 | -1.23 | 0.081 | -1.17 | 0.076 | -1.39 | 0.047 |
| 1418798_s_at | serine/arginine-rich protein specific kinase 3                   | Srpk3            | -1.37 | 0.309 | -1.53 | 0.038 | -1.43 | 0.203 | -1.69 | 0.180 | 2.47  | 0.566 |
| 1436499_at   | transmembrane protein 23                                         | Tmem23           | -1.08 | 0.076 | -1.53 | 0.023 | -1.38 | 0.024 | -1.61 | 0.001 | -1.55 | 0.030 |
| 1448551_a_at | tripartite motif protein 2                                       | Trim2            | 1.04  | 0.902 | -1.53 | 0.014 | 1.03  | 0.934 | -1.05 | 0.552 | -1.21 | 0.043 |
| 1420339_at   | RIKEN cDNA 0610016J10 gene                                       | 0610016J10Rik    | -1.04 | 0.706 | -1.54 | 0.003 | -1.39 | 0.006 | -1.18 | 0.024 | -1.49 | 0.010 |
| 1430784_a_at | RIKEN cDNA 4932417H02 gene                                       | 4932417H02Rik    | 1.18  | 0.131 | -1.54 | 0.028 | -1.03 | 0.788 | -1.26 | 0.118 | -1.06 | 0.484 |
| 1425878_at   | calcium binding protein 4                                        | Cabp4            | -1.75 | 0.143 | -1.54 | 0.021 | -1.08 | 0.534 | 1.14  | 0.929 | -1    | 0.900 |
| 1444279_at   | HECT, UBA and WWE domain containing 1                            | Huwe1            | 1.24  | 0.436 | -1.54 | 0.030 | 1.27  | 0.870 | -1.6  | 0.043 | -1.83 | 0.072 |
| 1425625_at   | interleukin 13 receptor, alpha 1                                 | Il13ra1          | 1.63  | 0.574 | -1.54 | 0.045 | 1.12  | 0.874 | -1.26 | 0.183 | 2.01  | 0.283 |
| 1437716_x_at | kinesin family member 22                                         | Kif22            | -1.23 | 0.125 | -1.54 | 0.028 | 1.04  | 0.813 | -1.18 | 0.036 | -1.18 | 0.127 |
| 1444285_at   | Mortality factor 4 like 1                                        | Morf4l1          | -1.08 | 0.628 | -1.54 | 0.003 | -1.91 | 0.096 | -2.37 | 0.016 | -2.07 | 0.062 |
| 1433839_at   | asparaginyl-tRNA synthetase 2 (mitochondrial)(putative)          | Nars2            | 1.03  | 0.912 | -1.54 | 0.015 | -1.19 | 0.239 | -1.18 | 0.016 | -1.04 | 0.566 |
| 1433835_at   | protein phosphatase 3, catalytic subunit, beta isoform           | Ppp3cb           | -1.21 | 0.115 | -1.54 | 0.016 | 1.02  | 0.826 | -1.17 | 0.030 | -1.11 | 0.282 |
| 1418845_at   | protein C                                                        | Proc             | -1.37 | 0.308 | -1.54 | 0.021 | 1.17  | 0.821 | 1.62  | 0.505 | -1.01 | 0.513 |
| 1428260_at   | spastic paraplegia 3A homolog (human)                            | Spg3a            | -1.01 | 0.734 | -1.54 | 0.027 | -1.09 | 0.398 | -1.01 | 0.853 | 1.19  | 0.032 |
| 1455398_at   | leucine rich repeat containing 8 family, member C                | Lrrc8c           | -1.14 | 0.225 | -1.55 | 0.040 | -1.04 | 0.452 | -1.19 | 0.016 | -1.22 | 0.026 |
| 1425132_at   | neuropilin (NRP) and tolloid (TLL)-like 1                        | Neto1            | 1.48  | 0.360 | -1.55 | 0.039 | 1.07  | 0.782 | 1.89  | 0.183 | 1.69  | 0.934 |
| 1426193_at   | otospiralin                                                      | Otos             | -1.54 | 0.099 | -1.55 | 0.013 | -1.08 | 0.493 | 1.27  | 0.280 | 1.67  | 0.638 |
| 1434392_at   | ubiquitin specific peptidase 34                                  | Usp34            | -1.07 | 0.518 | -1.55 | 0.049 | -1.29 | 0.035 | -1.46 | 0.018 | -1.65 | 0.008 |
| 1430185_at   | RIKEN cDNA 5830460E08 gene                                       | 5830460E08Rik    | -2.08 | 0.019 | -1.56 | 0.041 | -1.01 | 0.985 | 1.47  | 0.843 | -1.93 | 0.125 |
| 1432570_at   | RIKEN cDNA 6030458E02 gene                                       | 6030458E02Rik    | -1.4  | 0.000 | -1.56 | 0.013 | -1.26 | 0.178 | -1.06 | 0.521 | 1.1   | 0.986 |
| 1442670_at   | RIKEN cDNA 6430517E21 gene                                       | 6430517E21Rik    | -1.09 | 0.463 | -1.56 | 0.000 | 1.08  | 0.838 | 1.63  | 0.344 | 1.07  | 0.551 |
| 1425099_a_at | aryl hydrocarbon receptor nuclear translocator-like              | Arntl            | -1.08 | 0.412 | -1.56 | 0.015 | -1.38 | 0.020 | -1.43 | 0.010 | -1.77 | 0.007 |
| 1442595_at   | Expressed sequence C77713                                        | C77713           | -1.05 | 0.611 | -1.56 | 0.012 | -1.25 | 0.005 | -1.11 | 0.018 | -1.23 | 0.018 |
| 1457339_at   | Cerebral cavernous malformation 2 homolog (human)                | Ccm2             | 1.04  | 0.974 | -1.56 | 0.032 | -1.2  | 0.211 | -1.25 | 0.170 | -1.24 | 0.133 |
| 1449419_at   | dedicator of cytokinesis 8                                       | Dock8            | -1.18 | 0.231 | -1.56 | 0.022 | -1.28 | 0.123 | -1.41 | 0.035 | 1.01  | 0.741 |
| 1426057_a_at | Eph receptor A3                                                  | Epha3            | -1.19 | 0.232 | -1.56 | 0.042 | 1.34  | 0.861 | -1.09 | 0.574 | 1.01  | 0.646 |
| 1416236_a_at | epithelial V-like antigen 1                                      | Eva1             | -1.69 | 0.169 | -1.56 | 0.040 | 1.6   | 0.820 | 1.54  | 0.797 | 1.69  | 0.241 |
| 1437363_at   | homer homolog 1 (Drosophila)                                     | Homer1           | -1.04 | 0.442 | -1.56 | 0.026 | -1.13 | 0.089 | -1.02 | 0.550 | -1.28 | 0.012 |
| 1456784_at   | hypothetical protein LOC623781                                   | LOC623781        | 1.11  | 0.113 | -1.56 | 0.042 | 1.56  | 0.919 | 1.24  | 0.797 | 1.15  | 0.603 |

|              |                                                                                              |                    |       |       |       |       |       |       |       |       |       |       |
|--------------|----------------------------------------------------------------------------------------------|--------------------|-------|-------|-------|-------|-------|-------|-------|-------|-------|-------|
| 1454741_s_at | transmembrane protein 164                                                                    | Tmem164            | -1.24 | 0.029 | -1.56 | 0.001 | -1.06 | 0.263 | -1.15 | 0.032 | -1.22 | 0.039 |
| 1454723_at   | RIKEN cDNA 1110033M05 gene                                                                   | 1110033M05Rik      | 1.06  | 0.927 | -1.57 | 0.007 | -1.53 | 0.004 | -1.38 | 0.011 | -1.67 | 0.003 |
| 1452703_at   | RIKEN cDNA 4631427C17 gene                                                                   | 4631427C17Rik      | -1.18 | 0.032 | -1.57 | 0.022 | -1.05 | 0.464 | -1.07 | 0.137 | 1.04  | 0.265 |
| 1457622_at   | cDNA sequence BE983540                                                                       | BE983540           | 1.18  | 0.733 | -1.57 | 0.037 | 2.38  | 0.565 | 1.58  | 0.927 | -1.59 | 0.087 |
| 1427873_at   | defensin related cryptdin 15                                                                 | Defcr15            | 1.02  | 0.688 | -1.57 | 0.034 | -1.18 | 0.553 | -1.17 | 0.340 | 1.45  | 0.792 |
| 1424443_at   | hepatoma-derived growth factor, related protein 3 /// transmembrane protein 3 /// Tm6sf1     | Hdgrfp3 /// Tm6sf1 | 1.24  | 0.082 | -1.57 | 0.025 | -1.03 | 0.369 | 1     | 0.584 | 1.67  | 0.192 |
| 1453712_a_at | mitogen activated protein kinase kinase 5                                                    | Map2k5             | 1.06  | 0.837 | -1.57 | 0.032 | -1.39 | 0.104 | -1.46 | 0.064 | -2.23 | 0.013 |
| 1434509_at   | Rap guanine nucleotide exchange factor (GEF) 6                                               | Rapgef6            | -1.05 | 0.564 | -1.57 | 0.000 | -1.21 | 0.025 | -1.35 | 0.011 | -1.4  | 0.008 |
| 1439302_at   | ubiquitin-activating enzyme E1-like 2                                                        | Ube1l2             | -1.06 | 0.526 | -1.57 | 0.038 | -1.49 | 0.015 | -1.32 | 0.003 | -1.47 | 0.018 |
| 1425913_a_at | RIKEN cDNA 2810022L02 gene                                                                   | 2810022L02Rik      | 1.14  | 0.835 | -1.58 | 0.032 | -1.12 | 0.089 | -1.25 | 0.024 | -1.31 | 0.028 |
| 1454563_at   | RIKEN cDNA 4930573C08 gene                                                                   | 4930573C08Rik      | -1.35 | 0.215 | -1.58 | 0.004 | 1.24  | 0.032 | -1.37 | 0.313 | 2.13  | 0.008 |
| 1430268_at   | RIKEN cDNA 9630005C17 gene                                                                   | 9630005C17Rik      | -1.14 | 0.326 | -1.58 | 0.024 | 1.03  | 0.875 | 2.08  | 0.589 | 1.38  | 0.033 |
| 1452996_a_at | apoptosis, caspase activation inhibitor                                                      | Aven               | -1.06 | 0.201 | -1.58 | 0.035 | -1.08 | 0.213 | -1.1  | 0.057 | -1.13 | 0.129 |
| 1439903_at   | cDNA sequence BC028663                                                                       | BC028663           | -1.36 | 0.189 | -1.58 | 0.032 | 1.21  | 0.964 | -1.05 | 0.610 | 3.38  | 0.314 |
| 1457425_at   | RIKEN cDNA C130038G02 gene                                                                   | C130038G02Rik      | -1.82 | 0.090 | -1.58 | 0.044 | -1.16 | 0.421 | -1.64 | 0.018 | 1.16  | 0.525 |
| 1439493_at   | RIKEN cDNA D630040G17 gene /// similar to zinc finger protein 17Rik                          | D630040G17Rik      | -1.16 | 0.298 | -1.58 | 0.036 | -1.24 | 0.041 | -1.57 | 0.003 | -1.31 | 0.047 |
| 1457316_at   | microtubule-associated protein 6                                                             | Mtap6              | -1.19 | 0.017 | -1.58 | 0.001 | -1.47 | 0.075 | -1.37 | 0.007 | -1.7  | 0.006 |
| 1419108_at   | oligophrenin 1                                                                               | Ophn1              | -1.08 | 0.508 | -1.58 | 0.032 | -1.44 | 0.080 | -1.14 | 0.238 | -1.97 | 0.031 |
| 1434037_s_at | p300/CBP-associated factor                                                                   | Pcaf               | -1.15 | 0.237 | -1.58 | 0.046 | -1.07 | 0.064 | -1.09 | 0.275 | -1.1  | 0.213 |
| 1446954_at   | Pyruvate dehydrogenase E1 alpha 1                                                            | Pdha1              | -1.12 | 0.184 | -1.58 | 0.021 | 1.05  | 0.970 | -1.14 | 0.467 | 1.06  | 0.680 |
| 1437067_at   | putative homeodomain transcription factor 2                                                  | Phf2               | -1.15 | 0.056 | -1.58 | 0.015 | 1.07  | 1.450 | -1.05 | 0.409 | -1.03 | 0.717 |
| 1449334_at   | tissue inhibitor of metalloproteinase 3                                                      | Timp3              | -1.06 | 0.483 | -1.58 | 0.001 | -1.13 | 0.002 | 1.04  | 0.964 | -1.24 | 0.070 |
| 1434997_at   | cell division cycle 2-like 6 (CDK8-like)                                                     | Cdc2l6             | 1.14  | 0.156 | -1.59 | 0.002 | 1.08  | 0.463 | -1.08 | 0.426 | -1.03 | 0.680 |
| 1436181_at   | development and differentiation enhancing factor 2                                           | Ddef2              | 1.02  | 0.911 | -1.59 | 0.047 | -1.07 | 0.354 | -1.28 | 0.132 | 1.05  | 0.526 |
| 1442116_at   | G protein-coupled receptor 176                                                               | Gpr176             | -1.15 | 0.045 | -1.59 | 0.001 | -1.22 | 0.062 | -1.18 | 0.068 | -1.4  | 0.020 |
| 1428484_at   | oxysterol binding protein-like 3                                                             | Osbpl3             | -1.03 | 0.297 | -1.59 | 0.026 | -1.28 | 0.005 | -1.25 | 0.078 | -1.4  | 0.000 |
| 1419053_at   | peroxisomal biogenesis factor 14                                                             | Pex14              | -1    | 0.770 | -1.59 | 0.035 | -1.13 | 0.263 | -1.4  | 0.001 | -1.38 | 0.048 |
| 1437161_x_at | RNA binding protein gene with multiple splicing                                              | Rbpms              | -1.03 | 0.655 | -1.59 | 0.019 | -1.27 | 0.017 | -1.33 | 0.007 | -1.31 | 0.014 |
| 1423592_at   | Rho-associated coiled-coil containing protein kinase 2                                       | Rock2              | 1.08  | 0.497 | -1.59 | 0.012 | -1.28 | 0.045 | -1.31 | 0.032 | -1.45 | 0.042 |
| 1446760_at   | thyroid hormone receptor interactor 13                                                       | Trip13             | 1.05  | 0.926 | -1.59 | 0.021 | 1.03  | 0.790 | 2     | 0.049 | -1    | 0.914 |
| 1452368_at   | breakpoint cluster region homolog                                                            | Bcr                | -1.06 | 0.639 | -1.6  | 0.000 | -1.1  | 0.369 | -1.24 | 0.125 | -1.04 | 0.669 |
| 1425680_a_at | beta-transducin repeat containing protein                                                    | Btrc               | 1.07  | 0.829 | -1.6  | 0.018 | 1.03  | 0.854 | -1.12 | 0.417 | -1.27 | 0.115 |
| 1422278_at   | dopamine receptor 3                                                                          | Drd3               | -1.6  | 0.017 | -1.6  | 0.047 | 1.2   | 0.800 | -1.49 | 0.266 | -1.03 | 0.607 |
| 1451699_at   | similar to putative retrovirus-related gag protein /// hypothetical: LOC668468 /// LOC668468 | LOC668468          | -1.76 | 0.040 | -1.6  | 0.033 | -1.01 | 0.626 | 1.18  | 0.305 | -1.05 | 0.521 |
| 1435514_at   | leucine zipper transcription factor-like 1                                                   | Lztlf1             | -1.08 | 0.614 | -1.6  | 0.002 | 1.06  | 0.185 | 1.01  | 0.896 | -1.15 | 0.250 |
| 1428700_at   | purinergic receptor P2Y, G-protein coupled 13                                                | P2ry13             | -1.09 | 0.452 | -1.6  | 0.011 | 1.3   | 0.153 | 1.2   | 0.345 | -1.32 | 0.172 |
| 1419279_at   | phosphatidylinositol-4-phosphate 5-kinase, type II, alpha                                    | Pip5k2a            | 1.07  | 0.574 | -1.6  | 0.004 | -1.4  | 0.012 | -1.48 | 0.009 | -1.46 | 0.002 |
| 1437092_at   | restin-like 2                                                                                | Rsnl2              | -1.37 | 0.059 | -1.6  | 0.024 | -1.09 | 0.461 | 1.17  | 0.514 | -1.09 | 0.412 |
| 1459846_x_at | transmembrane protein 4                                                                      | Tmem4              | -1.23 | 0.366 | -1.6  | 0.035 | -1.08 | 0.534 | 1.24  | 0.340 | 1.19  | 0.382 |
| 1436225_at   | transient receptor potential cation channel, subfamily M, member 2                           | Trpm2              | -1.74 | 0.074 | -1.6  | 0.024 | 1.12  | 0.677 | -1.22 | 0.235 | 1.36  | 0.318 |
| 1459480_at   | DNA segment, Chr 6, ERATO Doi 90, expressed                                                  | D6Ert90e           | 1.28  | 0.537 | -1.61 | 0.040 | 1.04  | 0.561 | 1.53  | 0.864 | 1.47  | 0.447 |
| 1456217_at   | DNA segment, Chr 7, Wayne State University 128, expressed                                    | D7Wsu128e          | -1.15 | 0.506 | -1.61 | 0.023 | -1.07 | 0.482 | 1.19  | 0.053 | -1.04 | 0.361 |
| 1435241_at   | RIKEN cDNA D930036F22 gene                                                                   | D930036F22Rik      | -1.06 | 0.204 | -1.61 | 0.003 | -1.38 | 0.006 | -1.26 | 0.013 | -1.47 | 0.000 |
| 1429806_at   | Era (G-protein)-like 1 (E. coli)                                                             | Eral1              | -1.16 | 0.327 | -1.61 | 0.008 | 1.34  | 0.685 | 1.02  | 0.855 | 1.06  | 0.991 |
| 1449269_at   | coagulation factor V                                                                         | F5                 | -1.65 | 0.091 | -1.61 | 0.029 | 1.55  | 0.962 | 1.02  | 0.989 | 1.69  | 0.406 |
| 1455078_at   | Heat shock protein 90kDa alpha (cytosolic), class A member                                   | Hsp90aa1           | 1.04  | 0.800 | -1.61 | 0.011 | -1.37 | 0.008 | -1.54 | 0.017 | -1.38 | 0.016 |
| 1459109_at   | sema domain, seven thrombospondin repeats (type 1 and type 2)                                | Sema5a             | -2.04 | 0.080 | -1.61 | 0.050 | 2.18  | 0.186 | 2.16  | 0.095 | 2.01  | 0.830 |
| 1425074_at   | Werner syndrome homolog (human)                                                              | Wrn                | -1.05 | 0.530 | -1.61 | 0.006 | -1.23 | 0.210 | -1.22 | 0.021 | -1.06 | 0.699 |
| 1431470_a_at | RIKEN cDNA 4933414I15 gene                                                                   | 4933414I15Rik      | -1.91 | 0.071 | -1.62 | 0.040 | 1.28  | 0.655 | 1.02  | 0.625 | 1.2   | 0.722 |
| 1436025_at   | RIKEN cDNA A430106J12 gene                                                                   | A430106J12Rik      | -1.04 | 0.602 | -1.62 | 0.017 | -1.35 | 0.004 | -1.33 | 0.107 | -1.73 | 0.021 |
| 1448789_at   | aldehyde dehydrogenase family 1, subfamily A3                                                | Aldh1a3            | -1.04 | 0.532 | -1.62 | 0.005 | -1.2  | 0.053 | -1.27 | 0.001 | -1.17 | 0.011 |
| 1432507_at   | RIKEN cDNA B430319H21 gene                                                                   | B430319H21Rik      | 1.21  | 0.736 | -1.62 | 0.034 | -1.87 | 0.033 | 1.07  | 0.441 | 1.05  | 0.865 |
| 1439104_at   | RIKEN cDNA C230081A13 gene                                                                   | C230081A13Rik      | -1.06 | 0.339 | -1.62 | 0.000 | -1.7  | 0.002 | -1.67 | 0.002 | -1.68 | 0.009 |
| 1434311_at   | CCR4-NOT transcription complex, subunit 6-like                                               | Cnot6l             | 1.01  | 0.956 | -1.62 | 0.017 | -1.26 | 0.095 | -1.18 | 0.260 | -1.2  | 0.184 |
| 1455748_at   | G protein-coupled receptor 178                                                               | Gpr178             | 1.17  | 0.680 | -1.62 | 0.008 | 1.88  | 0.654 | -1.07 | 0.411 | -1.07 | 0.489 |
| 1446408_at   | Homeo box A10                                                                                | Hoxa10             | -1.2  | 0.421 | -1.62 | 0.022 | 1.53  | 0.846 | -1.01 | 0.759 | 1.11  | 0.603 |
| 1418420_at   | myogenic differentiation 1                                                                   | Myod1              | 1.18  | 0.224 | -1.62 | 0.010 | 1.21  | 0.936 | -1.94 | 0.007 | 1.26  | 0.472 |
| 1432592_at   | pregnancy-associated plasma protein A                                                        | Pappa              | -1.12 | 0.352 | -1.62 | 0.022 | -1.72 | 0.052 | -1.34 | 0.015 | -1.58 | 0.006 |



|              |                                                                                  |                   |       |       |       |       |       |       |       |       |       |       |
|--------------|----------------------------------------------------------------------------------|-------------------|-------|-------|-------|-------|-------|-------|-------|-------|-------|-------|
| 1448852_at   | regucalcin                                                                       | Rgn               | -1.57 | 0.053 | -1.62 | 0.022 | -1.16 | 0.499 | 1.09  | 0.638 | -1.28 | 0.318 |
| 1442801_x_at | transmembrane 7 superfamily member 3                                             | Tm7sf3            | -1.34 | 0.351 | -1.62 | 0.016 | -1.12 | 0.521 | -1.5  | 0.135 | 1.28  | 0.786 |
| 1428517_at   | WD repeat and FYVE domain containing 3                                           | Wdfy3             | -1.13 | 0.058 | -1.62 | 0.025 | -1.23 | 0.120 | -1.82 | 0.006 | -1.91 | 0.002 |
| 1431381_at   | RIKEN cDNA 3110005L24 gene                                                       | 3110005L24Rik     | -1.04 | 0.476 | -1.63 | 0.028 | 1.36  | 0.396 | -1.01 | 0.677 | 1.49  | 0.541 |
| 1420679_a_at | androgen-induced 1                                                               | Aig1              | -1.03 | 0.730 | -1.63 | 0.032 | -1.14 | 0.180 | -1.16 | 0.011 | -1.26 | 0.000 |
| 1434260_at   | FCH and double SH3 domains 2                                                     | Fchsd2            | -1.03 | 0.511 | -1.63 | 0.031 | -1.32 | 0.011 | -1.68 | 0.000 | -1.35 | 0.005 |
| 1426148_at   | globoside alpha-1,3-N-acetylgalactosaminyltransferase 1                          | Gbgt1             | -1.66 | 0.186 | -1.63 | 0.038 | 1.33  | 0.888 | 1.62  | 0.365 | 1.57  | 0.080 |
| 1420353_at   | lymphotoxin A                                                                    | Lta               | -1.47 | 0.005 | -1.63 | 0.035 | 1.05  | 0.931 | -1.03 | 0.749 | 1.11  | 0.884 |
| 1450650_at   | myosin X                                                                         | Myo10             | -1.13 | 0.229 | -1.63 | 0.015 | -1.7  | 0.022 | -1.58 | 0.013 | -1.49 | 0.017 |
| 1449481_at   | solute carrier family 25 (mitochondrial carrier, adenine nucleoside)             | Slc25a13          | 1.08  | 0.505 | -1.63 | 0.032 | -1.11 | 0.081 | -1.21 | 0.059 | -1.37 | 0.089 |
| 1450923_at   | transforming growth factor, beta 2                                               | Tgfb2             | -1.01 | 0.934 | -1.63 | 0.002 | -1.18 | 0.125 | -1.21 | 0.022 | -1.27 | 0.025 |
| 1456705_at   | Zinc finger protein 532                                                          | Zfp532            | -1.48 | 0.096 | -1.63 | 0.041 | 1.04  | 0.566 | 1.43  | 0.186 | -1.33 | 0.032 |
| 1434335_at   | expressed sequence AI317237                                                      | AI317237          | -1.17 | 0.067 | -1.64 | 0.024 | -1.18 | 0.003 | -1.5  | 0.018 | -1.38 | 0.003 |
| 1457827_at   | arylsulfatase J                                                                  | Arsj              | -1.08 | 0.299 | -1.64 | 0.013 | -1.01 | 0.675 | -1.12 | 0.271 | -1.2  | 0.078 |
| 1435297_at   | gap junction membrane channel protein alpha 9                                    | Gja9              | -1.05 | 0.434 | -1.64 | 0.046 | -1.33 | 0.265 | -1.95 | 0.183 | -1.41 | 0.073 |
| 1455056_at   | LIM domain only 7                                                                | Lmo7              | -1.14 | 0.299 | -1.64 | 0.020 | -1.11 | 0.099 | -1.56 | 0.093 | -1.38 | 0.074 |
| 1443941_at   | hypothetical gene supported by AK049058; BC025881                                | LOC433886         | -1.09 | 0.429 | -1.64 | 0.024 | 1.08  | 0.848 | 1.2   | 0.157 | -1.29 | 0.154 |
| 1449494_at   | RAB3C, member RAS oncogene family                                                | Rab3c             | -1.34 | 0.222 | -1.64 | 0.028 | -1.25 | 0.400 | -1.77 | 0.079 | -1.35 | 0.396 |
| 1453333_at   | RIKEN cDNA 1700012P22 gene                                                       | 1700012P22Rik     | -1.07 | 0.559 | -1.65 | 0.048 | -1.32 | 0.037 | -1.29 | 0.131 | -1.18 | 0.251 |
| 1453166_at   | RIKEN cDNA D130073L02 gene                                                       | D130073L02Rik     | -1.16 | 0.361 | -1.65 | 0.040 | -1.05 | 0.499 | -1.11 | 0.401 | -1.2  | 0.206 |
| 1444814_at   | DNA segment, Chr 15, ERATO Doi 180, expressed                                    | D15Erd180e        | 1.18  | 0.466 | -1.65 | 0.032 | -1.62 | 0.005 | -1.15 | 0.503 | 1     | 0.517 |
| 1438801_at   | dynamamin 3                                                                      | Dnm3              | -1.78 | 0.031 | -1.65 | 0.017 | 1.17  | 0.407 | -1.73 | 0.065 | -1.4  | 0.106 |
| 1442223_at   | Enabled homolog (Drosophila)                                                     | Enah              | 1.03  | 0.462 | -1.65 | 0.011 | -1.65 | 0.111 | -1.56 | 0.038 | -2.05 | 0.035 |
| 1433930_at   | Heparanase                                                                       | Hpse              | -1.45 | 0.045 | -1.65 | 0.041 | -1.54 | 0.157 | 2.33  | 0.506 | 2.9   | 0.101 |
| 1449270_at   | plexin domain containing 2                                                       | Plxdc2            | -1.29 | 0.125 | -1.65 | 0.033 | -1.27 | 0.207 | -1.68 | 0.062 | -1.69 | 0.046 |
| 1453269_at   | unc-5 homolog B (C. elegans)                                                     | Unc5b             | -1.24 | 0.135 | -1.65 | 0.038 | -1.28 | 0.156 | -1.17 | 0.065 | -1.23 | 0.032 |
| 1452150_at   | expressed sequence AU040320                                                      | AU040320          | -1.06 | 0.096 | -1.66 | 0.035 | -1.17 | -1.16 | -1.06 | 0.318 | -1.19 | 0.002 |
| 1460011_at   | cytochrome P450, family 26, subfamily b, polypeptide 1                           | Cyp26b1           | -1.14 | 0.450 | -1.66 | 0.039 | 1.17  | 0.785 | 1.27  | 0.253 | 1     | 0.892 |
| 1458464_at   | HECT, C2 and WW domain containing E3 ubiquitin protein ligase 1                  | Hecw2             | -1.37 | 0.279 | -1.66 | 0.011 | -1.04 | 0.501 | 1.17  | 0.602 | 1.76  | 0.254 |
| 1422851_at   | high mobility group AT-hook 2                                                    | Hmga2             | 1.01  | 0.953 | -1.66 | 0.016 | -1.6  | 0.001 | -1.7  | 0.000 | -1.61 | 0.000 |
| 1454809_at   | nuclear receptor coactivator 7                                                   | Ncoa7             | 1.11  | 0.489 | -1.66 | 0.018 | -1.09 | 0.454 | -1.28 | 0.011 | -1.19 | 0.365 |
| 1460615_at   | 5'-nucleotidase domain containing 1                                              | Nt5dc1            | 1     | 0.918 | -1.66 | 0.006 | -1.19 | 0.023 | -1.37 | 0.023 | -1.66 | 0.014 |
| 1422363_at   | olfactory receptor 65                                                            | Olf64             | -1.53 | 0.237 | -1.66 | 0.020 | 1.16  | 0.614 | 1.24  | 0.278 | 1.35  | 0.711 |
| 1417542_at   | ribosomal protein S6 kinase, polypeptide 2                                       | Rps6ka2           | -1.22 | 0.011 | -1.66 | 0.014 | -1.05 | 0.435 | -1.09 | 0.009 | -1.22 | 0.048 |
| 1444465_at   | Ubiquitination factor E4B, UFD2 homolog (S. cerevisiae)                          | Ube4b             | -1.01 | 0.838 | -1.66 | 0.011 | -1.19 | 0.168 | 1.61  | 0.558 | 1.18  | 0.190 |
| 1452008_at   | RIKEN cDNA 9130422G05 gene                                                       | 9130422G05Rik     | -1.11 | 0.453 | -1.67 | 0.039 | -1.25 | 0.085 | -1.25 | 0.041 | -1.29 | 0.014 |
| 1440928_at   | RIKEN cDNA D630037F22 gene                                                       | D630037F22Rik     | -1.08 | 0.523 | -1.67 | 0.006 | 1.27  | 0.017 | -1.21 | 0.150 | 1.19  | 0.173 |
| 1422445_at   | integrin alpha 6                                                                 | Itg6              | 1.02  | 0.995 | -1.67 | 0.034 | -1.16 | 0.047 | -1.41 | 0.002 | -1.33 | 0.008 |
| 1424704_at   | runt related transcription factor 2                                              | Runx2             | -1.11 | 0.370 | -1.67 | 0.017 | -1.44 | 0.001 | -1.67 | 0.007 | -1.65 | 0.016 |
| 1429428_at   | transcription factor 7-like 2, T-cell specific, HMG-box                          | Tcf7l2            | -1.03 | 0.449 | -1.67 | 0.017 | 1.01  | 0.619 | -1.33 | 0.005 | -1.26 | 0.029 |
| 1458438_at   | RIKEN cDNA 4933415L06 gene                                                       | 4933415L06Rik     | -1.37 | 0.235 | -1.68 | 0.010 | 1.05  | 0.996 | -1.4  | 0.008 | 1.01  | 0.904 |
| 1431517_at   | RIKEN cDNA 4933417C20 gene                                                       | 4933417C20Rik     | -1.36 | 0.202 | -1.68 | 0.018 | 1.14  | 0.670 | -1.47 | 0.064 | -1.27 | 0.236 |
| 1445125_at   | DNA segment, Chr 8, ERATO Doi 107, expressed                                     | D8Erd107e         | -1.59 | 0.250 | -1.68 | 0.002 | -1.36 | 0.401 | 1.39  | 0.169 | 3.52  | 0.784 |
| 1432296_a_at | integrin alpha V                                                                 | Ilgav             | 1.13  | 0.393 | -1.68 | 0.034 | -1.3  | 0.008 | 1.22  | 0.304 | -1.02 | 0.349 |
| 1434129_s_at | lipoma HMGIC fusion partner-like 2                                               | Lhfp12            | -1.04 | 0.817 | -1.68 | 0.014 | -1.29 | 0.008 | -1.18 | 0.055 | -1.5  | 0.019 |
| 1429111_at   | talin 2 /// similar to talin 2                                                   | Tln2 /// LOC63921 | -1.2  | 0.033 | -1.68 | 0.002 | -1.46 | 0.005 | -1.41 | 0.006 | -1.5  | 0.005 |
| 1455593_at   | apolipoprotein B                                                                 | ApoB              | -1.37 | 0.152 | -1.69 | 0.035 | 1.36  | 0.909 | 1.11  | 0.797 | -1.42 | 0.248 |
| 1455082_at   | Casitas B-lineage lymphoma b                                                     | Cblb              | -1.07 | 0.213 | -1.69 | 0.007 | -1.41 | 0.018 | -1.48 | 0.044 | -1.97 | 0.041 |
| 1426732_at   | desmin                                                                           | Des               | -1.58 | 0.069 | -1.69 | 0.028 | 1.23  | 0.849 | 2.6   | 0.178 | 3.21  | 0.254 |
| 1428321_at   | echinoderm microtubule associated protein like 1 /// similar to Eml1 /// LOC6341 | Eml1 /// LOC6341  | -1.03 | 0.544 | -1.69 | 0.009 | -1.08 | 0.130 | -1.01 | 0.918 | -1.35 | 0.285 |
| 1425216_at   | free fatty acid receptor 2                                                       | Ffar2             | 2.08  | 0.637 | -1.69 | 0.038 | -1.12 | 0.376 | 1.31  | 0.829 | 4.17  | 0.160 |
| 1437409_s_at | G protein-coupled receptor 126                                                   | Gpr126            | 1.13  | 0.354 | -1.69 | 0.043 | 1.55  | 0.473 | 1.28  | 0.241 | -1.02 | 0.574 |
| 1417400_at   | retinoic acid induced 14                                                         | Rai14             | -1.08 | 0.204 | -1.69 | 0.008 | -1.32 | 0.013 | -1.36 | 0.016 | -1.5  | 0.014 |
| 1427917_s_at | single-stranded DNA binding protein 3                                            | Ssbp3             | -1.21 | 0.148 | -1.69 | 0.036 | -1.13 | 0.096 | -1.25 | 0.032 | -1.07 | 0.397 |
| 1455109_at   | transducin (beta)-like 1X-linked receptor 1                                      | Tbl1xr1           | -1.13 | 0.342 | -1.69 | 0.002 | 1.14  | 0.502 | -1.09 | 0.511 | 1.11  | 0.557 |
| 1458090_at   | RIKEN cDNA 4930504E06 gene                                                       | 4930504E06Rik     | 1.67  | 0.705 | -1.7  | 0.023 | 1.38  | 0.789 | -1.08 | 0.502 | -1.39 | 0.376 |
| 1454080_at   | RIKEN cDNA 4933428M03 gene                                                       | 4933428M03Rik     | -1.32 | 0.565 | -1.7  | 0.028 | 2.05  | 0.416 | 1.47  | 0.820 | 2.05  | 0.503 |
| 1452013_at   | ATPase, class V, type 10A                                                        | Atp10a            | 1.09  | 0.715 | -1.7  | 0.008 | 1.39  | 0.240 | -1.26 | 0.203 | -1.4  | 0.073 |

|              |                                                                                    |                    |       |       |       |       |       |       |       |       |       |       |
|--------------|------------------------------------------------------------------------------------|--------------------|-------|-------|-------|-------|-------|-------|-------|-------|-------|-------|
| 1419490_at   | expressed sequence AW049604                                                        | AW049604           | 1.06  | 0.982 | -1.7  | 0.028 | 1.47  | 0.988 | -1.22 | 0.089 | -1.14 | 0.351 |
| 1456416_at   | core-binding factor, runt domain, alpha subunit 2, translocate                     | Cbfa2t2h           | -1.4  | 0.125 | -1.7  | 0.034 | -1.2  | 0.339 | -1.47 | 0.132 | 1.65  | 0.547 |
| 1438255_at   | checkpoint suppressor 1                                                            | Ches1              | -1    | 0.861 | -1.7  | 0.014 | -1.35 | 0.012 | -1.5  | 0.039 | -1.3  | 0.060 |
| 1447233_at   | RIKEN cDNA D330027H18 gene                                                         | D330027H18Rik      | -1.25 | 0.321 | -1.7  | 0.002 | 1.35  | 0.976 | 2.26  | 0.006 | 1.49  | 0.079 |
| 1415691_at   | discs, large homolog 1 (Drosophila)                                                | Dlgh1              | 1.04  | 0.898 | -1.7  | 0.028 | -1.68 | 0.001 | -1.62 | 0.001 | -1.95 | 0.004 |
| 1444276_at   | immature colon carcinoma transcript 1                                              | Ict1               | -1.39 | 0.002 | -1.7  | 0.005 | -1.35 | 0.182 | -1.16 | 0.428 | 1.14  | 0.423 |
| 1440621_at   | Kit ligand                                                                         | Kitl               | -1.49 | 0.084 | -1.7  | 0.040 | -1.23 | 0.339 | 1.07  | 0.646 | 1.25  | 0.748 |
| 1425978_at   | myocardin                                                                          | Myocd              | -1.34 | 0.095 | -1.7  | 0.016 | -1.27 | 0.079 | -1.21 | 0.257 | -1.24 | 0.234 |
| 1424659_at   | slit homolog 2 (Drosophila)                                                        | Slit2              | -1.27 | 0.100 | -1.7  | 0.044 | -1.22 | 0.043 | -1.2  | 0.015 | -1.22 | 0.025 |
| 1456645_at   | WD repeat domain 25                                                                | Wdr25              | 1.12  | 0.660 | -1.7  | 0.011 | 1.08  | 0.905 | 1.11  | 0.345 | -1.37 | 0.146 |
| 1440703_at   | RIKEN cDNA 2810429104 gene                                                         | 2810429104Rik      | 1.34  | 0.427 | -1.71 | 0.006 | 1.23  | 0.768 | -1.6  | 0.173 | -2.32 | 0.033 |
| 1453522_at   | RIKEN cDNA 6530401N04 gene                                                         | 6530401N04Rik      | -1.42 | 0.069 | -1.71 | 0.042 | 1.04  | 0.900 | -1.2  | 0.214 | 1.19  | 0.767 |
| 1454984_at   | expressed sequence AW061234                                                        | AW061234           | -1.24 | 0.147 | -1.71 | 0.050 | -1.38 | 0.098 | -1.09 | 0.480 | 1.23  | 0.430 |
| 1424361_at   | cDNA sequence BC019943                                                             | BC019943           | -1.71 | 0.113 | -1.71 | 0.008 | -1.22 | 0.117 | -1.09 | 0.867 | 1.3   | 0.313 |
| 1427763_a_at | calcium/calmodulin-dependent protein kinase II, delta                              | Camk2d             | 1.08  | 0.975 | -1.71 | 0.043 | -1.74 | 0.004 | -1.51 | 0.005 | -1.86 | 0.022 |
| 1452265_at   | CLIP associating protein 1                                                         | Clasp1             | -1.09 | 0.202 | -1.71 | 0.006 | -1.56 | 0.014 | -1.73 | 0.001 | -1.96 | 0.000 |
| 1420512_at   | dickkopf homolog 2 (Xenopus laevis)                                                | Dkk2               | 1.12  | 0.042 | -1.71 | 0.019 | -1.04 | 0.506 | -1.2  | 0.212 | -1.25 | 0.134 |
| 1422684_a_at | exocyst complex component 4                                                        | Exoc4              | -1.15 | 0.021 | -1.71 | 0.015 | -1.39 | 0.013 | -1.32 | 0.014 | -1.51 | 0.082 |
| 1453771_at   | GULP, engulfment adaptor PTB domain containing 1                                   | Gulp1              | 1.03  | 0.785 | -1.71 | 0.015 | -1.19 | 0.027 | -1.19 | 0.012 | -1.22 | 0.110 |
| 1444620_at   | Transcription factor 12                                                            | Tcf12              | -1.11 | 0.498 | -1.71 | 0.030 | -1.14 | 0.330 | 1.02  | 0.486 | -1.13 | 0.490 |
| 1437616_x_at | zinc finger, DHHC domain containing 14                                             | Zdhhc14            | 1.03  | 0.886 | -1.71 | 0.018 | 1.01  | 0.711 | -1.21 | 0.382 | -1.62 | 0.004 |
| 1438863_at   | RIKEN cDNA A530079E22 gene                                                         | A530079E22Rik      | -1.9  | 0.116 | -1.72 | 0.024 | 1.04  | 0.790 | 1.64  | 0.063 | 1.47  | 0.711 |
| 1441650_at   | Rho GTPase activating protein 15                                                   | Arhgap15           | -1.32 | 0.065 | -1.72 | 0.036 | -1.25 | 0.414 | 1.26  | 0.837 | -1.07 | 0.669 |
| 1421672_at   | interleukin 17A                                                                    | Il17a              | -1.34 | 0.036 | -1.72 | 0.045 | 1.51  | 0.425 | 1.48  | 0.884 | 1.35  | 0.262 |
| 1423140_at   | lysosomal acid lipase 1                                                            | Lip1               | -1.21 | 0.145 | -1.72 | 0.010 | 1.07  | 0.846 | 1.07  | 0.539 | 1.05  | 0.947 |
| 1436746_at   | WNK lysine deficient protein kinase 1                                              | Wnk1               | -1.29 | 0.169 | -1.72 | 0.009 | -1.62 | 0.046 | -1.4  | 0.041 | -1.23 | 0.085 |
| 1441688_at   | RIKEN cDNA 6430537121 gene                                                         | 6430537121Rik      | -1.17 | 0.371 | -1.73 | 0.022 | 1.24  | 0.059 | 1.07  | 0.909 | -1.1  | 0.415 |
| 1435179_at   | RIKEN cDNA C130071C03 gene                                                         | C130071C03Rik      | -1.94 | 0.071 | -1.73 | 0.046 | 1.22  | 0.429 | 1.58  | 0.900 | 1.33  | 0.842 |
| 1448437_a_at | GTP binding protein 2                                                              | Gtppb2             | -1.47 | 0.036 | -1.73 | 0.049 | -1.27 | 0.328 | 2.04  | 0.092 | 1.03  | 0.485 |
| 1453317_a_at | KH domain containing, RNA binding, signal transduction assoc                       | Khrbbs3            | -1.12 | 0.055 | -1.73 | 0.007 | -1.44 | 0.002 | -1.28 | 0.011 | -1.45 | 0.000 |
| 1444326_at   | Prolyl 4-hydroxylase, beta polypeptide                                             | P4hb               | -1.01 | 0.746 | -1.73 | 0.031 | 1.07  | 0.592 | -1.12 | 0.140 | -1.01 | 0.987 |
| 1428493_at   | RIKEN cDNA 2610511M17 gene /// similar to signal-induced                           | 2610511M17Rik //   | -1.17 | 0.275 | -1.74 | 0.005 | -1.4  | 0.047 | -1.8  | 0.005 | -1.63 | 0.000 |
| 1437704_at   | RIKEN cDNA 2900024O10 gene                                                         | 2900024O10Rik      | -1.27 | 0.187 | -1.74 | 0.012 | 1.03  | 0.937 | -1    | 0.636 | -1.12 | 0.519 |
| 1429909_at   | RIKEN cDNA 4833411O04 gene                                                         | 4833411O04Rik      | -1.27 | 0.233 | -1.74 | 0.015 | 1.34  | 0.733 | 1.11  | 0.592 | 1.27  | 0.780 |
| 1455720_at   | a disintegrin-like and metallopeptidase (reprolysin type) with 1                   | Adamts2            | 1.02  | 0.969 | -1.74 | 0.023 | -1.6  | 0.049 | -1.05 | 0.842 | -1.56 | 0.052 |
| 1448223_at   | fatso                                                                              | Fto                | -1.12 | 0.224 | -1.74 | 0.002 | -1.23 | 0.030 | -1.29 | 0.043 | -1.29 | 0.041 |
| 1452232_at   | UDP-N-acetyl-alpha-D-galactosamine: polypeptide N-acetylglucosaminyl transferase 7 | Galnt7             | 1.04  | 0.812 | -1.74 | 0.002 | -1.08 | 0.276 | -1.32 | 0.003 | -1.19 | 0.069 |
| 1436356_at   | lectin, galactose binding, soluble 7                                               | Lgal7              | 1.06  | 0.633 | -1.74 | 0.003 | -1.83 | 0.004 | -1.72 | 0.001 | -2.08 | 0.013 |
| 1450786_x_at | similar to PDZ and LIM domain protein 5 (Enigma homolog) (LOC669660)               | LOC669660          | 1.02  | 0.849 | -1.74 | 0.031 | -1.77 | 0.021 | -1.76 | 0.004 | -1.84 | 0.009 |
| 1443162_at   | Protein tyrosine phosphatase, non-receptor type 3                                  | Ptpn3              | 1.1   | 0.848 | -1.74 | 0.037 | -1.18 | 0.494 | -1.08 | 0.623 | 1.23  | 0.790 |
| 1417622_at   | solute carrier family 12, member 2                                                 | Slc12a2            | -1.17 | 0.104 | -1.74 | 0.032 | 1.03  | 0.414 | 1.06  | 0.820 | -1.13 | 0.256 |
| 1432566_at   | RIKEN cDNA 1700129115 gene                                                         | 1700129115Rik      | -1.19 | 0.374 | -1.75 | 0.010 | 2.38  | 0.500 | 1.29  | 0.971 | 2.3   | 0.468 |
| 1418179_at   | autophagy-related 3 (yeast)                                                        | Atg3               | 1.1   | 0.648 | -1.75 | 0.038 | -1.17 | 0.155 | -1.13 | 0.346 | 1.13  | 0.479 |
| 1428638_at   | EF-hand domain (C-terminal) containing 2                                           | Efhc2              | -1.06 | 0.769 | -1.75 | 0.017 | 2.89  | 0.546 | 1.53  | 0.412 | 1.7   | 0.410 |
| 1456858_at   | G protein-coupled receptor 149                                                     | Gpr149             | 1.24  | 1.264 | -1.75 | 0.002 | 1.27  | 0.315 | -1.08 | 0.552 | 1.17  | 0.333 |
| 1440582_at   | itchy /// RIKEN cDNA 8030492O04 gene                                               | Itch /// 8030492OC | -1.06 | 0.468 | -1.75 | 0.015 | -1.06 | 0.512 | -1.04 | 0.753 | -1.48 | 0.036 |
| 1453946_a_at | serologically defined colon cancer antigen 8                                       | Sdccag8            | -1.01 | 0.715 | -1.75 | 0.023 | -1.32 | 0.085 | -1.1  | 0.372 | -1.58 | 0.089 |
| 1444198_at   | Dorso-medial telencephalon gene 2                                                  | Dmt2               | -1.02 | 0.470 | -1.76 | 0.040 | 1.02  | 0.610 | 1     | 0.922 | 1.28  | 0.776 |
| 1457713_at   | Excision repair cross-complementing rodent repair deficiency                       | Ercc5              | -1.62 | 0.094 | -1.76 | 0.036 | -1.7  | 0.065 | 1.05  | 0.560 | 1.32  | 0.891 |
| 1431296_at   | G protein-coupled receptor 15                                                      | Gpr15              | -1.68 | 0.068 | -1.76 | 0.012 | 2.42  | 0.594 | -1.17 | 0.294 | 1     | 0.787 |
| 1435293_at   | RIKEN cDNA 2900022I03Rik                                                           | 2900022I03Rik      | -1.6  | 0.157 | -1.77 | 0.040 | 1.11  | 0.969 | 1.07  | 0.780 | -1.14 | 0.393 |
| 1455326_at   | RIKEN cDNA 4932416N17 gene                                                         | 4932416N17Rik      | -1.17 | 0.243 | -1.77 | 0.011 | 1.58  | 0.737 | -1.67 | 0.078 | -1.14 | 0.542 |
| 1435006_s_at | ATP-binding cassette, sub-family B (MDR/TAP), member 7                             | Abcb7              | -1.02 | 0.624 | -1.77 | 0.006 | -1.02 | 0.669 | -1.15 | 0.306 | -1.24 | 0.019 |
| 1440097_at   | miRNA containing gene                                                              | Mirg               | -1.25 | 0.134 | -1.77 | 0.021 | 1.23  | 0.621 | -1.6  | 0.039 | 1.05  | 0.964 |
| 1434222_at   | signal-induced proliferation-associated 1 like 1                                   | Sipa1l1            | 1.05  | 0.438 | -1.77 | 0.001 | -1.76 | 0.006 | -1.71 | 0.008 | -1.87 | 0.001 |
| 1431449_at   | solute carrier organic anion transporter family, member 6d1                        | Slco6d1            | -1.13 | 0.544 | -1.77 | 0.048 | 1.25  | 0.603 | -1.14 | 0.686 | 1.92  | 0.030 |
| 1460118_at   | Transcribed locus                                                                  | ---                | -1.17 | 0.397 | -1.78 | 0.010 | -1    | 0.835 | 1.49  | 0.462 | 1.04  | 0.662 |
| 1434404_at   | RIKEN cDNA C030011O14 gene                                                         | C030011O14Rik      | -1.08 | 0.328 | -1.78 | 0.027 | 1.08  | 0.114 | 1.01  | 0.820 | 1.06  | 0.950 |

|              |                                                                    |                  |       |       |       |       |       |       |       |       |       |       |
|--------------|--------------------------------------------------------------------|------------------|-------|-------|-------|-------|-------|-------|-------|-------|-------|-------|
| 1442242_at   | expressed sequence C79127                                          | C79127           | 1.07  | 0.981 | -1.78 | 0.015 | 1.54  | 0.110 | -1.33 | 0.264 | 1.19  | 0.442 |
| 1434957_at   | cell adhesion molecule-related/down-regulated by oncogenes         | Cdon             | -1.31 | 0.028 | -1.78 | 0.018 | 1.07  | 0.526 | 1.05  | 0.734 | -1.16 | 0.173 |
| 1419983_at   | zinc finger protein 644                                            | Zfp644           | 1     | 0.708 | -1.78 | 0.035 | 3.08  | 0.676 | 2.06  | 0.269 | 1.17  | 0.766 |
| 1433833_at   | fibronectin type III domain containing 3B                          | Fndc3b           | 1.03  | 0.851 | -1.79 | 0.021 | -1.87 | 0.000 | -2.01 | 0.000 | -2.37 | 0.000 |
| 1446783_at   | Growth arrest and DNA-damage-inducible, gamma interactin           | Gadd45gip1       | -1.26 | 0.171 | -1.79 | 0.038 | 1.24  | 0.382 | 1.1   | 0.874 | -1.07 | 0.646 |
| 1423271_at   | gap junction membrane channel protein beta 2                       | Gjb2             | -1.17 | 0.069 | -1.79 | 0.017 | -1.29 | 0.089 | -1.35 | 0.003 | -1.46 | 0.013 |
| 1452714_at   | tetratricopeptide repeat, ankyrin repeat and coiled-coil containin | Tanc1            | 1.07  | 0.602 | -1.79 | 0.011 | -1.62 | 0.004 | -1.86 | 0.009 | -1.89 | 0.001 |
| 1435888_at   | epidermal growth factor receptor                                   | Egfr             | -1.14 | 0.236 | -1.8  | 0.024 | -1.44 | 0.025 | -1.68 | 0.006 | -1.68 | 0.015 |
| 1448024_at   | natriuretic peptide receptor 3                                     | Npr3             | -1.12 | 0.331 | -1.8  | 0.033 | -1.44 | 0.035 | -1.11 | 0.145 | -1.29 | 0.116 |
| 1428083_at   | RIKEN cDNA 2310043N10 gene                                         | 2310043N10Rik    | -1.05 | 0.461 | -1.81 | 0.049 | -1.28 | 0.151 | -1.42 | 0.178 | -1.92 | 0.023 |
| 1416077_at   | adrenomedullin                                                     | Adm              | 1.09  | 0.824 | -1.81 | 0.029 | -1.52 | 0.069 | -1.6  | 0.003 | -1.81 | 0.026 |
| 1456022_at   | homeodomain interacting protein kinase 2                           | Hipk2            | 1.01  | 0.934 | -1.81 | 0.048 | -1.76 | 0.024 | -1.99 | 0.001 | -2.01 | 0.024 |
| 1419410_at   | basic leucine zipper transcription factor, ATF-like                | Batf             | -2    | 0.120 | -1.83 | 0.041 | 2.15  | 0.930 | -1.34 | 0.193 | -1.8  | 0.073 |
| 1459679_s_at | myosin IB                                                          | Myo1b            | -1.1  | 0.068 | -1.83 | 0.019 | -1.36 | 0.018 | -1.31 | 0.202 | -1.86 | 0.076 |
| 1434653_at   | PTK2 protein tyrosine kinase 2 beta                                | PTK2b            | -1.05 | 0.703 | -1.83 | 0.010 | -1.29 | 0.003 | -1.41 | 0.026 | -1.29 | 0.125 |
| 1457478_at   | Spermatid perinuclear RNA binding protein                          | Strbp            | -2.41 | 0.039 | -1.83 | 0.010 | -1.19 | 0.358 | -1.45 | 0.130 | -1.18 | 0.311 |
| 1433299_at   | RIKEN cDNA 5830461L22 gene                                         | 5830461L22Rik    | 1.1   | 0.858 | -1.84 | 0.034 | -1.05 | 0.560 | 1.08  | 0.969 | 1.16  | 0.836 |
| 1447035_at   | RIKEN cDNA A230091C14 gene                                         | A230091C14Rik    | -1.73 | 0.084 | -1.84 | 0.025 | -1.47 | 0.162 | -1.27 | 0.212 | 1.48  | 0.865 |
| 1452253_at   | cysteine rich transmembrane BMP regulator 1 (chordin like)         | Crim1            | -1.29 | 0.150 | -1.84 | 0.005 | -1.44 | 0.102 | -1.66 | 0.036 | -1.07 | 0.751 |
| 1428964_at   | solute carrier family 25 (mitochondrial carrier), member 18        | Slc25a18         | -2.61 | 0.032 | -1.84 | 0.002 | 1.43  | 0.488 | 1.21  | 0.436 | 1.26  | 0.721 |
| 1433719_at   | solute carrier family 9 (sodium/hydrogen exchanger), isoform       | Slc9a9           | 1.15  | 0.698 | -1.84 | 0.023 | -1.51 | 0.004 | 1.14  | 0.354 | -1.19 | 0.471 |
| 1422256_at   | somatostatin receptor 2                                            | Sstr2            | -1.06 | 0.497 | -1.84 | 0.020 | -1.21 | 0.033 | 1.13  | 0.799 | -1.45 | 0.081 |
| 1453394_at   | RIKEN cDNA 2410017117 gene                                         | 2410017117Rik    | 1.06  | 0.818 | -1.85 | 0.001 | 1.4   | 0.854 | 1.07  | 0.176 | 1.49  | 0.996 |
| 1434645_at   | RIKEN cDNA C530008M17 gene                                         | C530008M17Rik    | 1.29  | 0.356 | -1.85 | 0.032 | -1.15 | 0.144 | -1.47 | 0.007 | -1.23 | 0.011 |
| 1430371_x_at | eukaryotic translation initiation factor 2 alpha kinase 3          | Eif2ak3          | 1.21  | 0.937 | -1.85 | 0.016 | 1.44  | 0.960 | 1.17  | 0.582 | -1.17 | 0.567 |
| 1418217_at   | non-metastatic cells 7, protein expressed in                       | Nme7             | -1.18 | 0.093 | -1.85 | 0.007 | -1.06 | 0.096 | -1.06 | 0.122 | -1.24 | 0.126 |
| 1459903_at   | sema domain, immunoglobulin domain (Ig), and GPI membrane          | Sema7a           | -1.21 | 0.128 | -1.85 | 0.049 | -1.35 | 0.013 | -1.38 | 0.018 | -1.41 | 0.005 |
| 1428471_at   | sorbin and SH3 domain containing 1                                 | Sorbs1           | -1.03 | 0.479 | -1.85 | 0.015 | -1.88 | 0.000 | -1.93 | 0.000 | -2.24 | 0.001 |
| 1419551_s_at | serine/threonine kinase 39, STE20/SPS1 homolog (yeast)             | Stk39            | 1.16  | 0.921 | -1.85 | 0.012 | -1.17 | 0.132 | -1.49 | 0.027 | -1.39 | 0.052 |
| 1445057_at   | expressed sequence C81285                                          | C81285           | 1.02  | 0.680 | -1.86 | 0.008 | 1.63  | 0.821 | 1.49  | 0.458 | 1.56  | 0.544 |
| 1421381_a_at | procollagen, type IX, alpha 1                                      | Col9a1           | -1.28 | 0.173 | -1.86 | 0.036 | 1.66  | 0.376 | 1.44  | 0.616 | 1.42  | 0.303 |
| 1455746_at   | kinesin family member 13A                                          | Kif13a           | 1.23  | 0.061 | -1.86 | 0.020 | -1.19 | 0.008 | -1.4  | 0.003 | -1.42 | 0.033 |
| 1415959_at   | solute carrier family 2 (facilitated glucose transporter), membe   | Slc2a4           | -1.03 | 0.816 | -1.86 | 0.028 | 1.81  | 0.625 | -1.15 | 0.516 | 2.73  | 0.194 |
| 1418651_at   | spermatogenesis associated 6                                       | Spata6           | -1.16 | 0.207 | -1.86 | 0.032 | 1.03  | 0.894 | -1.2  | 0.163 | -1.42 | 0.042 |
| 1429053_at   | RIKEN cDNA 1110012J17 gene                                         | 1110012J17Rik    | -1.13 | 0.257 | -1.87 | 0.002 | -1.06 | 0.600 | -1.13 | 0.071 | 1.17  | 0.056 |
| 1451116_at   | acetoacetyl-CoA synthetase                                         | Aacs             | -1.45 | 0.028 | -1.87 | 0.024 | 1.37  | 0.459 | 1.02  | 0.749 | 1.21  | 0.579 |
| 1442214_at   | Nuclear factor I/B                                                 | Nfib             | -1.31 | 0.269 | -1.87 | 0.004 | 2.01  | 0.033 | -1.04 | 0.521 | 1.01  | 0.529 |
| 1444422_at   | protocadherin 19                                                   | Pcdh19           | -1.21 | 0.242 | -1.87 | 0.022 | -1.34 | 0.002 | -1.26 | 0.078 | -1.41 | 0.006 |
| 1433608_at   | sec1 family domain containing 2                                    | Scfd2            | -1.14 | 0.062 | -1.87 | 0.029 | -1.11 | 0.304 | -1.21 | 0.093 | -1.23 | 0.021 |
| 1453414_at   | yippee-like 2 (Drosophila)                                         | Ypel2            | 1.25  | 0.766 | -1.87 | 0.000 | 1.48  | 0.308 | 2.01  | 0.839 | -1.13 | 0.393 |
| 1431367_at   | membrane-associated ring finger (C3HC4) 1                          | 1-Mar            | -1.11 | 0.433 | -1.88 | 0.022 | 1.01  | 0.878 | -1.58 | 0.172 | -1.01 | 0.694 |
| 1437869_at   | RIKEN cDNA 3222402P14 gene                                         | 3222402P14Rik    | -1.12 | 0.021 | -1.88 | 0.005 | -1.29 | 0.159 | -1.14 | 0.287 | -1.72 | 0.040 |
| 1455660_at   | colony stimulating factor 2 receptor, beta 1, low-affinity (granu  | Csf2rb1          | -1.42 | 0.156 | -1.88 | 0.046 | 1.4   | 0.033 | -1    | 0.635 | -1.26 | 0.651 |
| 1434112_at   | latrophilin 2                                                      | Lphn2            | -1.15 | 0.327 | -1.88 | 0.022 | -1.34 | 0.002 | -1.14 | 0.113 | -1.43 | 0.019 |
| 1451141_at   | methyltransferase like 8                                           | Mettl8           | -1.14 | 0.149 | -1.88 | 0.019 | 1.03  | 0.793 | 1.03  | 0.868 | -1.08 | 0.603 |
| 1434878_at   | SLIT and NTRK-like family, member 4                                | Slitrk4          | 1.76  | 0.036 | -1.88 | 0.025 | 2.16  | 0.897 | 1.87  | 0.331 | -2.58 | 0.033 |
| 1456908_at   | cDNA sequence BC023202                                             | BC023202         | 1.03  | 0.965 | -1.89 | 0.011 | -1.39 | 0.282 | -1.27 | 0.444 | 1.59  | 0.075 |
| 1441047_at   | solute carrier family 45, member 4                                 | Slc45a4          | -1.64 | 0.068 | -1.89 | 0.016 | 1.36  | 0.302 | 2.25  | 0.030 | 2.38  | 0.614 |
| 1431648_at   | RIKEN cDNA 4930528F23 gene                                         | 4930528F23Rik    | 1.04  | 0.854 | -1.9  | 0.019 | 1.24  | 0.692 | 1.16  | 0.715 | -1.64 | 0.182 |
| 1444443_at   | RIKEN cDNA A830039H10 gene                                         | A830039H10Rik    | -1.2  | 0.514 | -1.9  | 0.035 | -1.56 | 0.094 | 1.76  | 0.242 | 1.23  | 0.781 |
| 1460006_at   | AT motif binding factor 1                                          | Atbf1            | -1.14 | 0.107 | -1.9  | 0.002 | -1.76 | 0.002 | -1.99 | 0.000 | -2.15 | 0.002 |
| 1457157_at   | phospholipase C, eta 1                                             | Plch1            | -1.24 | 0.206 | -1.9  | 0.027 | -1.05 | 0.628 | 1.24  | 0.116 | -1.32 | 0.257 |
| 1420910_at   | phosphatidic acid phosphatase type 2c                              | Ppap2c           | -1    | 0.943 | -1.9  | 0.013 | -1.13 | 0.321 | 1.66  | 0.306 | 2.49  | 0.232 |
| 1424602_s_at | X-ray repair complementing defective repair in Chinese hams        | Xrcc4            | -1.26 | 0.129 | -1.9  | 0.030 | -1.35 | 0.115 | -1.22 | 0.050 | -1.59 | 0.018 |
| 1439922_at   | RIKEN cDNA 1190002C06 gene                                         | 1190002C06Rik    | -1.11 | 0.594 | -1.91 | 0.046 | -1.4  | 0.025 | -1.26 | 0.296 | -1.46 | 0.067 |
| 1427016_at   | RIKEN cDNA 4932438A13 gene /// similar to CG4841-PA                | 4932438A13Rik // | -1.49 | 0.016 | -1.91 | 0.029 | -1.19 | 0.136 | -1.22 | 0.270 | -1.63 | 0.031 |
| 1434265_s_at | ankyrin 2, brain                                                   | Ank2             | -1.27 | 0.145 | -1.91 | 0.049 | -1.3  | 0.098 | -1.28 | 0.041 | -1.34 | 0.131 |
| 1460291_at   | cyclin-dependent kinase 6                                          | Cdk6             | -1.22 | 0.314 | -1.91 | 0.032 | -1.01 | 0.375 | -1.11 | 0.379 | -1.15 | 0.823 |

|              |                                                                |               |       |       |       |       |       |       |       |       |       |       |
|--------------|----------------------------------------------------------------|---------------|-------|-------|-------|-------|-------|-------|-------|-------|-------|-------|
| 1425016_at   | Eph receptor B2                                                | Ephb2         | 1.03  | 0.961 | -1.91 | 0.017 | -1.17 | 0.262 | -1.14 | 0.298 | -1.42 | 0.027 |
| 1416934_at   | X-linked myotubular myopathy gene 1                            | Mtm1          | -1.06 | 0.299 | -1.91 | 0.012 | -1.08 | 0.451 | -1.18 | 0.212 | -1.24 | 0.158 |
| 1453707_at   | RIKEN cDNA 4930480G23 gene                                     | 4930480G23Rik | -1.05 | 0.667 | -1.92 | 0.044 | 1.16  | 0.567 | -1.94 | 0.047 | 2.04  | 0.291 |
| 1449763_at   | Doublesex and mab-3 related transcription factor 3             | Dmrt3         | -1.01 | 0.670 | -1.92 | 0.033 | 1.44  | 0.929 | -1.82 | 0.126 | -2.54 | 0.030 |
| 1446398_at   | hypothetical gene supported by AK028463                        | LOC433197     | -1.7  | 0.142 | -1.92 | 0.022 | -1.08 | 0.757 | 1.78  | 0.789 | 1.3   | 0.746 |
| 1450992_a_at | myeloid ecotropic viral integration site 1                     | Meis1         | -1    | 0.849 | -1.92 | 0.006 | -1.43 | 0.029 | -1.49 | 0.077 | -1.28 | 0.049 |
| 1449351_s_at | platelet-derived growth factor, C polypeptide                  | Pdgfc         | 1.07  | 0.742 | -1.92 | 0.015 | -1.75 | 0.012 | -1.91 | 0.007 | -1.86 | 0.000 |
| 1449530_at   | trichorhinopalangeal syndrome I (human)                        | Trps1         | 1.33  | 0.333 | -1.92 | 0.043 | -1.66 | 0.005 | -1.63 | 0.004 | -1.85 | 0.075 |
| 1434671_at   | RIKEN cDNA B230337E12 gene                                     | B230337E12Rik | -1.19 | 0.308 | -1.93 | 0.024 | -1.05 | 0.719 | -1.38 | 0.097 | -1.42 | 0.027 |
| 1435366_at   | RIKEN cDNA D430042O09 gene                                     | D430042O09Rik | 1     | 0.797 | -1.93 | 0.021 | -1.18 | 0.062 | -1.12 | 0.014 | -1.07 | 0.585 |
| 1449431_at   | transient receptor potential cation channel, subfamily C, mem  | Trpc6         | 1.06  | 0.811 | -1.93 | 0.045 | 1.69  | 0.913 | -1.35 | 0.091 | -1.51 | 0.006 |
| 1452964_at   | tubulin tyrosine ligase-like family, member 11                 | Ttll11        | -1.15 | 0.202 | -1.93 | 0.021 | -1.29 | 0.046 | -1.32 | 0.017 | -1.55 | 0.032 |
| 1446675_at   | adenosine kinase                                               | Adk           | 1.01  | 0.717 | -1.94 | 0.012 | -1.59 | 0.126 | -1.07 | 0.471 | 2.43  | 0.326 |
| 1450509_at   | carbohydrate sulfotransferase 11                               | Chst11        | -1.11 | 0.224 | -1.94 | 0.010 | -1.76 | 0.003 | -1.41 | 0.089 | -1.45 | 0.092 |
| 1460324_at   | DNA methyltransferase 3A                                       | Dnmt3a        | -1.44 | 0.074 | -1.94 | 0.041 | 1.01  | 0.951 | -1.27 | 0.026 | -1.19 | 0.129 |
| 1455314_at   | LIM domain containing preferred translocation partner in lipor | Lpp           | -1.14 | 0.045 | -1.94 | 0.001 | -1.66 | 0.004 | -1.55 | 0.000 | -1.99 | 0.009 |
| 1453611_at   | retinoblastoma binding protein 6                               | Rbbp6         | 1.63  | 0.990 | -1.94 | 0.047 | -1.34 | 0.128 | 1.75  | 0.383 | -2.02 | 0.196 |
| 1454250_at   | SEC15-like 2 (S. cerevisiae)                                   | Sec15l2       | -1.05 | 0.576 | -1.94 | 0.031 | -1.38 | 0.086 | 1.16  | 0.883 | 1.24  | 0.950 |
| 1460439_at   | cDNA sequence BC033915                                         | BC033915      | -1.07 | 0.605 | -1.95 | 0.001 | -1.44 | 0.017 | -1.34 | 0.010 | -1.49 | 0.044 |
| 1450207_at   | leukemia inhibitory factor receptor                            | Lifr          | -1.31 | 0.245 | -1.95 | 0.026 | 2.14  | 0.407 | 1.67  | 0.784 | 1.76  | 0.397 |
| 1417985_at   | Notch-regulated ankyrin repeat protein                         | Nrarp         | -1.09 | 0.329 | -1.95 | 0.049 | -1.35 | 0.074 | -1.1  | 0.307 | 1.16  | 0.737 |
| 1417020_at   | spermatogenesis associated 4                                   | Spata4        | -1.94 | 0.076 | -1.95 | 0.006 | 1.07  | 0.844 | 1.78  | 0.672 | -1.05 | 0.506 |
| 1454706_at   | UV radiation resistance associated gene                        | Uvrsg         | -1.04 | 0.271 | -1.95 | 0.005 | -1.53 | 0.005 | -1.98 | 0.004 | -1.73 | 0.000 |
| 1435301_at   | RIKEN cDNA 1110004E09 gene                                     | 1110004E09Rik | -1.18 | 0.258 | -1.96 | 0.042 | 1.04  | 0.776 | -1.26 | 0.220 | 1.61  | 0.226 |
| 1455331_at   | RIKEN cDNA 9430067K14 gene                                     | 9430067K14Rik | -1.25 | 0.198 | -1.96 | 0.021 | -1.08 | 0.328 | -1.05 | 0.576 | -1.03 | 0.681 |
| 1419989_at   | COMM domain containing 5                                       | Commf5        | -1.27 | 0.376 | -1.96 | 0.006 | 2.14  | 0.243 | 3.97  | 0.716 | -1.09 | 0.625 |
| 1430673_a_at | RIKEN cDNA 2210009G21 gene                                     | 2210009G21Rik | 1.04  | 0.844 | -1.97 | 0.045 | -1.37 | 0.092 | -1.14 | 0.348 | 1.87  | 0.067 |
| 1432449_at   | RIKEN cDNA 4930564B18 gene                                     | 4930564B18Rik | -2.2  | 0.045 | -1.97 | 0.045 | -1.07 | 0.423 | 1.9   | 0.090 | 1.26  | 0.382 |
| 1445021_at   | RIKEN cDNA 6030465E24 gene                                     | 6030465E24Rik | -1.94 | 0.022 | -1.97 | 0.050 | 1.14  | 0.440 | 1.56  | 0.390 | 1.3   | 0.844 |
| 1459391_at   | ATP-binding cassette, sub-family A (ABC1), member 5            | Abca5         | -1.25 | 0.324 | -1.97 | 0.011 | 2.56  | 0.531 | -1.11 | 0.331 | -1.79 | 0.088 |
| 1418336_at   | AFG3(ATPase family gene 3)-like 1 (yeast)                      | Afg3l1        | -1.23 | 0.147 | -1.97 | 0.007 | 1.05  | 0.482 | 1.1   | 0.527 | 1.25  | 0.222 |
| 1454780_at   | UDP-N-acetyl-alpha-D-galactosamine:polypeptide N-acetylgl      | Galnt4        | -1.13 | 0.099 | -1.97 | 0.000 | -1.73 | 0.000 | -1.49 | 0.000 | -1.89 | 0.000 |
| 1446096_at   | RIKEN cDNA 2310001H17 gene                                     | 2310001H17Rik | -1.14 | 0.506 | -1.98 | 0.045 | 1.46  | 0.784 | 3.12  | 0.020 | -1.15 | 0.210 |
| 1431667_s_at | RIKEN cDNA 2610021K21 gene                                     | 2610021K21Rik | -1.13 | 0.138 | -1.98 | 0.007 | 1.43  | 0.592 | -1.26 | 0.143 | -1.23 | 0.250 |
| 1430003_at   | RIKEN cDNA 6330412A17 gene                                     | 6330412A17Rik | -1.13 | 0.577 | -1.98 | 0.037 | -1.96 | 0.093 | 1.86  | 0.678 | 1.24  | 0.054 |
| 1429166_s_at | calmin                                                         | Clmn          | -1.22 | 0.399 | -1.98 | 0.049 | -1.74 | 0.173 | -1.19 | 0.129 | 1.12  | 0.401 |
| 1417163_at   | dual specificity phosphatase 10                                | Dusp10        | 1.12  | 0.919 | -1.98 | 0.029 | 1.32  | 0.983 | -1.37 | 0.361 | -1.13 | 0.621 |
| 1428822_a_at | sorting nexin 24                                               | Snx24         | -1.09 | 0.370 | -1.98 | 0.016 | -1.53 | 0.043 | -1.58 | 0.015 | -1.83 | 0.000 |
| 1445654_at   | RIKEN cDNA 4930422I07 gene                                     | 4930422I07Rik | 1.1   | 0.745 | -1.99 | 0.041 | 2.09  | 0.524 | 1.06  | 0.913 | 1.29  | 0.612 |
| 1432791_at   | RIKEN cDNA 9030218A15 gene                                     | 9030218A15Rik | 1.1   | 0.412 | -1.99 | 0.002 | -1.13 | 0.516 | 2.25  | 0.333 | 2.08  | 0.820 |
| 1424250_a_at | Rho guanine nucleotide exchange factor (GEF) 3                 | Arhgef3       | -1.47 | 0.111 | -1.99 | 0.004 | -1.1  | 0.840 | 1.66  | 0.908 | -1    | 0.490 |
| 1450468_at   | myocilin                                                       | Myoc          | -1.17 | 0.434 | -1.99 | 0.015 | 5.22  | 0.192 | -1.34 | 0.206 | 1.7   | 0.485 |
| 1439556_at   | neural cell adhesion molecule 1                                | Ncam1         | 1.04  | 0.840 | -1.99 | 0.037 | -1.64 | 0.072 | -1.27 | 0.211 | -2.02 | 0.105 |
| 1444516_at   | Protein tyrosine phosphatase, receptor-type, F interacting pr  | Ppfpbp2       | -1.56 | 0.087 | -1.99 | 0.005 | -1.51 | 0.206 | 1.41  | 0.621 | 1.2   | 0.529 |
| 1450916_at   | staufen (RNA binding protein) homolog 2 (Drosophila)           | Stau2         | 1.04  | 0.892 | -1.99 | 0.050 | -1.28 | 0.043 | -1.33 | 0.018 | -1.35 | 0.016 |
| 1449009_at   | T-cell specific GTPase                                         | Tgtp          | -1.36 | 0.082 | -1.99 | 0.037 | -1.16 | 0.426 | -1.32 | 0.243 | 1.58  | 0.979 |
| 1459259_at   | hypothetical protein A030007L22                                | A030007L22    | -1.38 | 0.351 | -2    | 0.003 | 1.99  | 0.335 | 1.31  | 0.717 | 2.18  | 0.250 |
| 1437082_at   | A kinase (PRKA) anchor protein (yotiao) 9                      | Akap9         | 1.05  | 0.597 | -2    | 0.002 | -1.47 | 0.142 | -1.23 | 0.116 | -1.16 | 0.168 |
| 1428610_at   | autophagy-related 7 (yeast)                                    | Atg7          | -1.2  | 0.435 | -2    | 0.022 | -1.55 | 0.072 | -1.05 | 0.493 | 1.29  | 0.648 |
| 1435994_at   | potassium voltage-gated channel, subfamily H (eag-related),    | Kcnh1         | -1.14 | 0.178 | -2    | 0.043 | 1.42  | 0.326 | -1.04 | 0.719 | -1.04 | 0.926 |
| 1436818_a_at | Musashi homolog 2 (Drosophila)                                 | Msi2          | 1.28  | 0.999 | -2    | 0.044 | -1.17 | 0.283 | -1.05 | 0.712 | 1.06  | 0.921 |
| 1433015_at   | RIKEN cDNA 6330436F06 gene                                     | 6330436F06Rik | -1.32 | 0.216 | -2.01 | 0.025 | 1.43  | 0.177 | 2.18  | 0.996 | 1.51  | 0.556 |
| 1447638_at   | Arylformamidase                                                | Afmid         | -1.82 | 0.074 | -2.01 | 0.009 | 2.69  | 0.387 | 1.08  | 0.982 | 1.73  | 0.044 |
| 1460090_at   | Ariadne ubiquitin-conjugating enzyme E2 binding protein hor    | Arih1         | 1.22  | 0.736 | -2.01 | 0.022 | 2.09  | 0.210 | -1.1  | 0.244 | 1.68  | 0.785 |
| 1442542_at   | eyes absent 4 homolog (Drosophila)                             | Eya4          | -1.13 | 0.431 | -2.01 | 0.027 | -1.24 | 0.084 | -1.22 | 0.200 | -1.14 | 0.268 |
| 1442283_at   | Phosphoglycerate dehydrogenase like 1                          | Phgdh1        | -1.42 | 0.292 | -2.01 | 0.049 | 1.31  | 0.737 | 2.24  | 0.131 | 1.55  | 0.768 |
| 1452209_at   | plakophilin 4                                                  | Pkp4          | -1.24 | 0.238 | -2.01 | 0.027 | -1.41 | 0.009 | -1.6  | 0.000 | -1.6  | 0.004 |
| 1438283_at   | RIKEN cDNA 3110057O12 gene                                     | 3110057O12Rik | -1.3  | 0.075 | -2.02 | 0.034 | -1.09 | 0.674 | -1.16 | 0.583 | 1.04  | 0.940 |

|              |                                                                |               |       |       |       |       |       |       |       |       |       |       |
|--------------|----------------------------------------------------------------|---------------|-------|-------|-------|-------|-------|-------|-------|-------|-------|-------|
| 1430115_at   | RIKEN cDNA 4833413E03 gene                                     | 4833413E03Rik | -1.86 | 0.074 | -2.02 | 0.049 | -1.49 | 0.041 | -1.02 | 0.721 | 1.59  | 0.215 |
| 1421210_at   | class II transactivator                                        | C2ta          | -1.69 | 0.042 | -2.02 | 0.020 | -1.31 | 0.202 | 1.08  | 0.485 | -1    | 0.921 |
| 1427199_at   | furry homolog-like (Drosophila)                                | Fryl          | -1.07 | 0.138 | -2.02 | 0.005 | -1.61 | 0.012 | -1.39 | 0.091 | -1.43 | 0.008 |
| 1448185_at   | homocysteine-inducible, endoplasmic reticulum stress-inducibl  | Herpud1       | 1.05  | 0.857 | -2.02 | 0.023 | -1.22 | 0.004 | -1.05 | 0.109 | -1.27 | 0.003 |
| 1421594_a_at | synaptotagmin-like 2                                           | Sylt2         | -1.09 | 0.141 | -2.02 | 0.004 | -1.33 | 0.004 | -1.45 | 0.027 | -1.43 | 0.026 |
| 1456165_at   | RIKEN cDNA 4921521F21 gene                                     | 4921521F21Rik | -1.89 | 0.028 | -2.03 | 0.019 | -1.12 | 0.448 | -1.08 | 0.542 | 2.64  | 0.147 |
| 1437031_at   | Acyl-CoA synthetase long-chain family member 6                 | Acsl6         | 1.05  | 0.511 | -2.03 | 0.050 | 1.72  | 0.353 | 1.09  | 0.754 | 2.85  | 0.248 |
| 1425092_at   | cadherin 10                                                    | Cdh10         | -1.22 | 0.716 | -2.03 | 0.028 | -1.24 | 0.352 | 1.08  | 0.837 | -1.26 | 0.250 |
| 1460694_s_at | supervillin                                                    | Svil          | -1.18 | 0.193 | -2.03 | 0.003 | -1.3  | 0.025 | -1.54 | 0.001 | -1.59 | 0.001 |
| 1422698_s_at | jumonji, AT rich interactive domain 2                          | Jarid2        | 1.11  | 0.755 | -2.04 | 0.009 | -1.58 | 0.007 | -1.64 | 0.018 | -1.7  | 0.034 |
| 1444466_at   | Neurocalcin delta                                              | Ncald         | -1.02 | 0.626 | -2.04 | 0.002 | 1.24  | 0.618 | 1.55  | 0.578 | 1.42  | 0.744 |
| 1421657_a_at | SRY-box containing gene 17                                     | Sox17         | -1.04 | 0.314 | -2.04 | 0.022 | 1.53  | 0.848 | -1.14 | 0.674 | 1.42  | 0.965 |
| 1456225_x_at | tribbles homolog 3 (Drosophila)                                | Trib3         | -1.34 | 0.109 | -2.04 | 0.020 | 1.16  | 0.317 | -1.11 | 0.126 | 1.09  | 0.364 |
| 1433197_at   | RIKEN cDNA 4930445B03 gene                                     | 4930445B03Rik | -1.03 | 0.684 | -2.05 | 0.014 | 1.18  | 0.826 | -1.58 | 0.193 | 1.24  | 0.694 |
| 1441867_x_at | RIKEN cDNA 4930534B04 gene                                     | 4930534B04Rik | -1.4  | 0.272 | -2.05 | 0.048 | -1.37 | 0.029 | -1.26 | 0.164 | -1.18 | 0.166 |
| 1435240_at   | bromodomain adjacent to zinc finger domain, 2B                 | Baz2b         | -1.06 | 0.442 | -2.05 | 0.015 | -1.06 | 0.385 | -1.57 | 0.026 | -1.82 | 0.028 |
| 1440427_at   | expressed sequence BB124205                                    | BB124205      | 1.02  | 0.892 | -2.05 | 0.015 | 1.18  | 0.752 | -1.64 | 0.051 | 1.14  | 0.510 |
| 1457687_at   | B-cell leukemia/lymphoma 2                                     | Bcl2          | -1.03 | 0.798 | -2.05 | 0.003 | -1.18 | 0.054 | -1.2  | 0.132 | 1.04  | 0.973 |
| 1425642_at   | centrosomal protein 290                                        | Cep290        | 1.04  | 0.726 | -2.05 | 0.034 | -1.11 | 0.306 | -1.07 | 0.327 | 1.38  | 0.849 |
| 1427671_a_at | formin 1                                                       | Fmn1          | -1.09 | 0.418 | -2.05 | 0.013 | -1.68 | 0.016 | -1.72 | 0.034 | -1.68 | 0.080 |
| 1449899_at   | glutamate receptor, ionotropic, NMDA3B                         | Grin3b        | 1.2   | 0.751 | -2.05 | 0.042 | 1.26  | 0.706 | 2.07  | 0.408 | -1.37 | 0.100 |
| 1460203_at   | inositol 1,4,5-triphosphate receptor 1                         | Itp1r1        | -1.24 | 0.068 | -2.05 | 0.011 | -1.32 | 0.029 | -1.29 | 0.030 | -1.46 | 0.037 |
| 1421650_at   | matrix extracellular phosphoglycoprotein with ASARM motif (I   | Mepe          | -1.64 | 0.101 | -2.05 | 0.039 | 1.36  | 0.918 | -1.03 | 0.490 | 1.32  | 0.518 |
| 1425442_at   | osteoclast associated receptor                                 | Oscar         | 1.22  | 0.627 | -2.05 | 0.037 | 1.21  | 0.881 | -1.06 | 0.254 | 1.07  | 0.614 |
| 1437113_s_at | phospholipase D1                                               | Pld1          | -1.08 | 0.391 | -2.05 | 0.025 | -1.5  | 0.028 | -1.11 | 0.320 | 1.22  | 0.282 |
| 1443065_at   | Rhomboid domain containing 1                                   | Rhbdd1        | -1.62 | 0.129 | -2.05 | 0.005 | -1.17 | 0.095 | -1.05 | 0.624 | -1.16 | 0.313 |
| 1455214_at   | microphthalmia-associated transcription factor                 | Mitf          | -1.02 | 0.854 | -2.06 | 0.043 | -1.15 | 0.178 | -1.1  | 0.261 | -1.02 | 0.731 |
| 1426994_at   | PH domain and leucine rich repeat protein phosphatase          | Phlpp         | 1.01  | 0.795 | -2.06 | 0.019 | -1.62 | 0.001 | -1.88 | 0.000 | -2.1  | 0.001 |
| 1446000_at   | Zinc finger protein 291                                        | Zfp291        | 1.04  | 0.724 | -2.06 | 0.047 | 1.54  | 0.617 | 1.34  | 0.551 | -1.17 | 0.676 |
| 1437855_at   | microtubule-associated protein 4                               | Mtap4         | -2.01 | 0.011 | -2.07 | 0.039 | -1.06 | 0.748 | -1.52 | 0.080 | -1.48 | 0.144 |
| 1455030_at   | protein tyrosine phosphatase, receptor type, J                 | Ptprij        | -1.5  | 0.018 | -2.07 | 0.027 | -1.36 | 0.207 | -1.54 | 0.024 | -1.88 | 0.004 |
| 1418057_at   | T-cell lymphoma invasion and metastasis 1                      | Tiam1         | -1.28 | 0.188 | -2.08 | 0.033 | -1.3  | 0.024 | -1.19 | 0.362 | -1.51 | 0.048 |
| 1447735_x_at | ataxin 2 binding protein 1                                     | A2bp1         | -1.59 | 0.103 | -2.09 | 0.036 | 1.67  | 0.791 | -1.16 | 0.237 | -1.11 | 0.519 |
| 1434683_at   | Cut-like 1 (Drosophila)                                        | Cutl1         | -1.14 | 0.164 | -2.09 | 0.007 | -1.75 | 0.004 | -1.96 | 0.003 | -2.06 | 0.003 |
| 1450119_at   | dystonin                                                       | Dst           | -1.22 | 0.221 | -2.09 | 0.013 | -1.59 | 0.177 | -1.59 | 0.072 | -2.22 | 0.003 |
| 1446383_at   | Ephrin A5                                                      | Efna5         | -1.56 | 0.133 | -2.09 | 0.044 | -1.19 | 0.303 | -1.26 | 0.353 | -1.48 | 0.259 |
| 1424899_at   | nicotinamide nucleotide adenyllyltransferase 3                 | Nmnat3        | 1.13  | 0.676 | -2.09 | 0.002 | 1.05  | 0.792 | -1.17 | 0.098 | 1     | 0.766 |
| 1437181_at   | pellino 2                                                      | Pel12         | -1.11 | 0.129 | -2.09 | 0.005 | -1.46 | 0.002 | -1.59 | 0.002 | -1.7  | 0.006 |
| 1429097_at   | RIKEN cDNA C030044C12 gene                                     | C030044C12Rik | -1.37 | 0.047 | -2.1  | 0.001 | -1.07 | 0.655 | -1.28 | 0.175 | -1.24 | 0.196 |
| 1427181_at   | DNA segment, Chr 18, ERATO Doi 653, expressed                  | D18Ert653e    | -1.16 | 0.512 | -2.1  | 0.002 | -2    | 0.067 | -2.78 | 0.003 | -1.92 | 0.031 |
| 1459950_at   | Doublecortin and CaM kinase-like 2                             | Dcamk2        | 1.31  | 0.698 | -2.1  | 0.042 | 1.39  | 0.815 | 1.02  | 0.570 | 1.53  | 0.124 |
| 1436667_at   | solute carrier family 6 (neurotransmitter transporter), member | Slc6a20       | 2.25  | 0.330 | -2.1  | 0.036 | 1.05  | 0.891 | 2.38  | 0.407 | 1.2   | 0.827 |
| 1443916_at   | RIKEN cDNA 2900026A02 gene                                     | 2900026A02Rik | -1.31 | 0.007 | -2.11 | 0.000 | -1.07 | 0.428 | -1.05 | 0.602 | -1.52 | 0.015 |
| 1438451_at   | Rho GTPase-activating protein                                  | Grit          | -1.11 | 0.393 | -2.11 | 0.035 | -1.54 | 0.034 | -1.78 | 0.004 | -2.06 | 0.013 |
| 1436378_at   | leucine rich repeat (in FLII) interacting protein 2            | Lrrfip2       | -1.19 | 0.145 | -2.11 | 0.009 | -1.17 | 0.202 | -1.2  | 0.059 | -1.24 | 0.143 |
| 1444068_at   | thyroid hormone receptor associated protein 1                  | Thrap1        | 1.72  | 0.448 | -2.11 | 0.043 | 1.74  | 0.741 | 1.9   | 0.448 | 2.2   | 0.199 |
| 1451577_at   | zinc finger and BTB domain containing 20                       | Zbtb20        | 1.12  | 0.362 | -2.11 | 0.005 | -1.74 | 0.009 | -1.59 | 0.040 | -2.37 | 0.001 |
| 1456045_at   | RIKEN cDNA 1700106N22 gene                                     | 1700106N22Rik | -1.65 | 0.139 | -2.12 | 0.044 | -1.64 | 0.004 | -1.03 | 0.662 | -1.49 | 0.044 |
| 1430820_a_at | bobby sox homolog (Drosophila)                                 | Bbx           | -1.27 | 0.136 | -2.12 | 0.039 | -1.43 | 0.155 | -1.17 | 0.218 | -1.46 | 0.032 |
| 1448748_at   | pleckstrin                                                     | Plek          | 1.18  | 0.283 | -2.12 | 0.032 | 1.1   | 0.776 | -1.12 | 0.142 | -1.77 | 0.097 |
| 1429841_at   | multiple EGF-like-domains 10                                   | Megf10        | -1.66 | 0.022 | -2.13 | 0.020 | 1.22  | 0.769 | -1.87 | 0.023 | -1.41 | 0.127 |
| 1438726_at   | microtubule associated monooxygenase, calponin and LIM do      | Mical2        | -1.15 | 0.012 | -2.13 | 0.043 | -1.82 | 0.009 | -2.08 | 0.008 | -1.58 | 0.078 |
| 1431751_a_at | metallophosphoesterase domain containing 2                     | Mpped2        | -1.31 | 0.013 | -2.13 | 0.034 | -1.39 | 0.141 | 1.2   | 0.467 | -1.11 | 0.499 |
| 1455970_at   | Phosphodiesterase 5A, cGMP-specific                            | Pde5a         | 1.14  | 0.659 | -2.13 | 0.043 | -1.24 | 0.096 | -1.28 | 0.083 | -1.09 | 0.361 |
| 1448918_at   | solute carrier organic anion transporter family, member 3a1    | Slco3a1       | 1.29  | 0.754 | -2.13 | 0.042 | -1.37 | 0.092 | -1.47 | 0.044 | -1.54 | 0.078 |
| 1450029_s_at | integrin alpha 9                                               | Itga9         | -1.1  | 0.521 | -2.14 | 0.035 | -1.17 | 0.183 | -1.28 | 0.200 | -1.43 | 0.125 |
| 1456067_at   | GLI-Kruppel family member GLI3                                 | Gliz          | -1.02 | 0.632 | -2.15 | 0.005 | -1.56 | 0.025 | -1.77 | 0.019 | -1.8  | 0.008 |
| 1417129_a_at | myeloid ecotropic viral integration site-related gene 1        | Mrg1          | -1    | 0.993 | -2.15 | 0.001 | -1.72 | 0.013 | -1.72 | 0.003 | -1.8  | 0.002 |

|              |                                                                                   |               |       |       |       |       |       |       |       |       |       |       |
|--------------|-----------------------------------------------------------------------------------|---------------|-------|-------|-------|-------|-------|-------|-------|-------|-------|-------|
| 1435463_s_at | myosin ID                                                                         | Myo1d         | -1.18 | 0.000 | -2.15 | 0.003 | -1.29 | 0.000 | -1.26 | 0.004 | -1.31 | 0.014 |
| 1452056_s_at | protein phosphatase 3, catalytic subunit, alpha isoform                           | Ppp3ca        | -1.21 | 0.023 | -2.15 | 0.008 | -1.25 | 0.127 | -1.46 | 0.006 | -1.37 | 0.001 |
| 1415905_at   | regenerating islet-derived 1                                                      | Reg1          | -1.86 | 0.054 | -2.15 | 0.031 | -1.01 | 0.960 | 2.41  | 0.504 | 1.24  | 0.382 |
| 1434407_at   | SLIT-ROBO Rho GTPase activating protein 2                                         | Srgap2        | -1    | 0.667 | -2.15 | 0.050 | -1.44 | 0.052 | -1.22 | 0.192 | -1.55 | 0.057 |
| 1449999_a_at | calcium channel, voltage-dependent, alpha2/delta subunit 1                        | Cacna2d1      | -1.48 | 0.015 | -2.16 | 0.018 | -1.13 | 0.553 | 1     | 0.916 | -1.3  | 0.076 |
| 1434290_at   | glycosyltransferase-like domain containing 1                                      | Gtdc1         | -1.3  | 0.199 | -2.16 | 0.048 | -1.57 | 0.046 | -1.58 | 0.107 | -1.6  | 0.005 |
| 1440208_at   | RAS-related C3 botulinum substrate 2                                              | Rac2          | -1.82 | 0.078 | -2.16 | 0.022 | 1.01  | 0.645 | 1.65  | 0.477 | 1.01  | 0.627 |
| 1432291_at   | RIKEN cDNA 0610033M10 gene                                                        | 0610033M10Rik | -1.69 | 0.069 | -2.17 | 0.012 | -1.19 | 0.228 | -1.04 | 0.596 | -1.28 | 0.454 |
| 1428696_at   | RIKEN cDNA 2310015N21 gene                                                        | 2310015N21Rik | -1.2  | 0.056 | -2.17 | 0.001 | -1.14 | 0.075 | -1.35 | 0.034 | -1.45 | 0.021 |
| 1431525_at   | RIKEN cDNA 9130002K18 gene                                                        | 9130002K18Rik | -1.35 | 0.259 | -2.17 | 0.031 | 1.97  | 0.963 | 1.73  | 0.050 | -1.11 | 0.514 |
| 1452982_at   | insulin-like growth factor I receptor                                             | Igf1r         | -1.05 | 0.553 | -2.17 | 0.008 | -1.54 | 0.002 | -1.59 | 0.020 | -1.84 | 0.022 |
| 1429796_at   | kalirin, RhoGEF kinase                                                            | Kalrn         | -1.29 | 0.066 | -2.17 | 0.001 | -1.4  | 0.047 | -1.71 | 0.016 | -1.54 | 0.003 |
| 1425449_at   | phosphatidic acid phosphatase 2a                                                  | Ppap2a        | 1.11  | 0.936 | -2.17 | 0.047 | 1.1   | 0.870 | 1.76  | 0.593 | 1.59  | 0.145 |
| 1418512_at   | serine/threonine kinase 3 (Ste20, yeast homolog)                                  | Stk3          | -1.19 | 0.209 | -2.17 | 0.011 | -1.11 | 0.169 | -1.28 | 0.015 | -1.3  | 0.083 |
| 1456446_at   | RIKEN cDNA 4930523C07 gene                                                        | 4930523C07Rik | 1.17  | 0.953 | -2.18 | 0.043 | -1.29 | 0.150 | 1.06  | 0.741 | -1.86 | 0.084 |
| 1427231_at   | roundabout homolog 1 (Drosophila)                                                 | Robo1         | -1.33 | 0.075 | -2.18 | 0.003 | -1.25 | 0.068 | -1.57 | 0.002 | -1.37 | 0.018 |
| 1426435_at   | transmembrane protein 135                                                         | Tmem135       | 1.05  | 0.836 | -2.18 | 0.005 | -1.16 | 0.031 | -1.41 | 0.019 | -1.92 | 0.001 |
| 1444514_at   | RIKEN cDNA B930096F20 gene                                                        | B930096F20Rik | -2.16 | 0.021 | -2.19 | 0.013 | 1.95  | 0.144 | -1.49 | 0.028 | 2.05  | 0.284 |
| 1439188_at   | cleavage and polyadenylation specific factor 6                                    | Cpsf6         | -2.2  | 0.009 | -2.19 | 0.021 | -1.05 | 0.575 | -1.32 | 0.358 | -1.57 | 0.186 |
| 1455732_at   | RIKEN cDNA 1700025G04 gene                                                        | 1700025G04Rik | -1.08 | 0.148 | -2.2  | 0.012 | -1.16 | 0.020 | -1.3  | 0.045 | -1.5  | 0.016 |
| 1432106_at   | RIKEN cDNA 6530403M18 gene                                                        | 6530403M18Rik | -2.21 | 0.014 | -2.2  | 0.027 | 1.06  | 0.494 | -1.03 | 0.626 | 2.01  | 0.162 |
| 1451154_a_at | CUG triplet repeat, RNA binding protein 2                                         | Cugbp2        | -1.3  | 0.252 | -2.2  | 0.047 | -1.19 | 0.037 | -1.3  | 0.003 | -1.31 | 0.018 |
| 1444330_at   | DNA segment, Chr 2, ERATO Doi 173, expressed                                      | D2Erttd173e   | -1.11 | 0.334 | -2.2  | 0.045 | 1.07  | 0.827 | 2.13  | 0.596 | 1.95  | 0.285 |
| 1425782_at   | phospholipase C, beta 1                                                           | Plcb1         | -1.04 | 0.381 | -2.2  | 0.030 | 1.54  | 0.891 | 1.48  | 0.449 | 1.78  | 0.285 |
| 1443924_at   | WNK lysine deficient protein kinase 3                                             | Wnk3          | -1.21 | 0.252 | -2.2  | 0.017 | 1.41  | 0.251 | -1.33 | 0.042 | -1    | 0.650 |
| 1425880_x_at | zinc finger protein 352                                                           | Zfp352        | -2.99 | 0.011 | -2.2  | 0.018 | -1.35 | 0.322 | 1.44  | 0.564 | 2.24  | 0.915 |
| 1447083_at   | RIKEN cDNA 4933407I05 gene                                                        | 4933407I05Rik | -1.36 | 0.014 | -2.21 | 0.006 | 1.34  | 0.895 | 1.86  | 0.223 | 1.59  | 0.448 |
| 1429205_at   | myeloid/lymphoid or mixed lineage-leukemia translocation to                       | Mllt3         | 1.05  | 0.838 | -2.21 | 0.043 | 1.09  | 0.767 | -1.77 | 0.016 | -1.1  | 0.497 |
| 1428509_at   | myosin IE                                                                         | Myo1e         | 1.14  | 0.661 | -2.21 | 0.027 | -1.76 | 0.006 | -2.05 | 0.009 | -2.04 | 0.005 |
| 1418749_at   | pleckstrin and Sec7 domain containing 3                                           | Psd3          | -1.11 | 0.309 | -2.21 | 0.043 | -1.5  | 0.008 | -1.4  | 0.051 | -1.81 | 0.001 |
| 1448765_at   | Fyn proto-oncogene                                                                | Fyn           | -1.15 | 0.180 | -2.22 | 0.004 | -1.66 | 0.007 | -1.92 | 0.000 | -2.1  | 0.002 |
| 1436889_at   | gamma-aminobutyric acid (GABA-A) receptor, subunit alpha                          | Gabra1        | -1.75 | 0.191 | -2.22 | 0.037 | -2.87 | 0.048 | -1.87 | 0.133 | -1.38 | 0.208 |
| 1444786_at   | nucleolar protein 3 (apoptosis repressor with CARD domain)                        | Nol3          | -1.28 | 0.494 | -2.22 | 0.039 | 1.98  | 0.260 | 1.75  | 0.088 | -1.02 | 0.882 |
| 1442443_at   | Retinoblastoma binding protein 4                                                  | Rbbp4         | 1.92  | 0.264 | -2.22 | 0.049 | 2.43  | 0.035 | -1.11 | 0.596 | 1.32  | 0.788 |
| 1425162_at   | RAR-related orphan receptor beta                                                  | Rorb          | 1.1   | 0.972 | -2.22 | 0.018 | -1.35 | 0.280 | 1.01  | 0.840 | 1.86  | 0.025 |
| 1431501_at   | RIKEN cDNA 1700037C18 gene                                                        | 1700037C18Rik | -1.6  | 0.000 | -2.23 | 0.045 | 1.16  | 0.631 | 2.54  | 0.455 | 1.53  | 0.183 |
| 1436827_at   | gene model 944, (NCBI)                                                            | Gm944         | -1.06 | 0.498 | -2.23 | 0.038 | -1.31 | 0.053 | -1.13 | 0.320 | -1.6  | 0.007 |
| 1425252_a_at | mitotic arrest deficient 1-like 1                                                 | Mad11l        | 1.48  | 0.971 | -2.23 | 0.048 | -1.28 | 0.088 | -1.28 | 0.202 | -1.75 | 0.011 |
| 1451443_at   | nuclear factor I/X                                                                | Nfix          | -2.21 | 0.022 | -2.23 | 0.006 | 1.17  | 0.766 | -1.83 | 0.149 | 1.28  | 0.414 |
| 1456829_at   | paraneoplastic antigen MA3                                                        | Pnma3         | -1.18 | 0.494 | -2.23 | 0.011 | 1.69  | 0.666 | -1.19 | 0.473 | 1.08  | 0.370 |
| 1440939_at   | Septin 6                                                                          | 6-Sep         | -2.03 | 0.084 | -2.24 | 0.036 | -1.14 | 0.423 | -1.06 | 0.563 | -1.37 | 0.188 |
| 1431949_at   | RIKEN cDNA 4930544F09 gene                                                        | 4930544F09Rik | -1.33 | 0.276 | -2.25 | 0.004 | 1.86  | 0.775 | 2     | 0.522 | 1.7   | 0.467 |
| 1420210_at   | Expressed sequence AV344025                                                       | AV344025      | 1.13  | 0.836 | -2.25 | 0.021 | 1.83  | 0.690 | -1.01 | 0.805 | 1.59  | 0.840 |
| 1458177_at   | emopamil binding protein-like                                                     | Ebpl          | -2.14 | 0.057 | -2.25 | 0.019 | -2.9  | 0.009 | 1.43  | 0.784 | -1.09 | 0.660 |
| 1436302_at   | RIKEN cDNA 2410193C02 gene                                                        | 2410193C02Rik | -1.12 | 0.236 | -2.26 | 0.003 | -1.46 | 0.015 | -1.52 | 0.001 | -1.72 | 0.010 |
| 1456837_at   | RIKEN cDNA A830007L07 gene                                                        | A830007L07Rik | 1.06  | 0.479 | -2.27 | 0.045 | 1.55  | 0.564 | -2.69 | 0.121 | 1.74  | 0.715 |
| 1459433_at   | RIKEN cDNA C130051F05 gene                                                        | C130051F05Rik | -1.28 | 0.408 | -2.27 | 0.030 | -1.75 | 0.086 | -1.74 | 0.170 | -1.9  | 0.182 |
| 1437699_at   | RIKEN cDNA E430014B02 gene                                                        | E430014B02Rik | -1.3  | 0.059 | -2.27 | 0.014 | 1.1   | 0.975 | -1.1  | 0.454 | 1.78  | 0.146 |
| 1433885_at   | IQ motif containing GTPase activating protein 2                                   | Iqgap2        | 1.16  | 0.526 | -2.27 | 0.038 | -1.47 | 0.056 | -1.07 | 0.420 | 1.03  | 0.902 |
| 1431921_a_at | stromal antigen 1                                                                 | Stag1         | -1.04 | 0.436 | -2.27 | 0.016 | -1.58 | 0.002 | -1.59 | 0.002 | -2.21 | 0.003 |
| 1434571_at   | vacuolar protein sorting 13B (yeast) /// similar to vacuolar pro Vps13b /// LOC66 | Vps13b        | -1.03 | 0.556 | -2.27 | 0.040 | -1.87 | 0.009 | -2.07 | 0.001 | -2.24 | 0.019 |
| 1427337_at   | aldehyde dehydrogenase 8 family, member A1                                        | Aldh8a1       | -1.78 | 0.126 | -2.28 | 0.038 | 2.01  | 0.080 | 1.49  | 0.153 | -1.64 | 0.139 |
| 1431354_a_at | phenylalanine-tRNA synthetase 2 (mitochondrial)                                   | Fars2         | 1.04  | 0.699 | -2.29 | 0.027 | -1.51 | 0.022 | -1.48 | 0.030 | -2.01 | 0.002 |
| 1442364_a_at | Mitogen activated protein kinase 14                                               | Mapk14        | -1.02 | 0.950 | -2.29 | 0.032 | -1.12 | 0.410 | 1.91  | 0.694 | 1.51  | 0.840 |
| 1443884_at   | thyroid adenoma associated                                                        | Thada         | -1.03 | 0.742 | -2.29 | 0.011 | -1.37 | 0.134 | -1.28 | 0.136 | -1.33 | 0.114 |
| 1430434_at   | transketolase-like 2                                                              | Tktl2         | -1.03 | 0.876 | -2.29 | 0.023 | -1.09 | 0.700 | 1.34  | 0.768 | 1.44  | 0.949 |
| 1435028_at   | WD repeat domain 7                                                                | Wdr7          | -1.17 | 0.172 | -2.29 | 0.008 | -1.39 | 0.055 | -1.49 | 0.014 | -1.68 | 0.007 |
| 1429273_at   | BMP-binding endothelial regulator                                                 | Bmper         | -1.36 | 0.087 | -2.3  | 0.047 | -1.13 | 0.124 | -1.14 | 0.297 | -1.49 | 0.038 |

|              |                                                                 |                  |       |       |       |       |       |       |       |       |       |       |
|--------------|-----------------------------------------------------------------|------------------|-------|-------|-------|-------|-------|-------|-------|-------|-------|-------|
| 1435269_at   | RIKEN cDNA 2510005D08 gene                                      | 2510005D08Rik    | 1.28  | 0.826 | -2.31 | 0.028 | -2.17 | 0.072 | 1.03  | 0.978 | 1.58  | 0.909 |
| 1431696_at   | RIKEN cDNA 4632413K17 gene                                      | 4632413K17Rik    | -1.75 | 0.100 | -2.31 | 0.019 | 1.03  | 0.614 | 1.59  | 0.812 | 1.84  | 0.817 |
| 1438694_at   | casein alpha s2-like A                                          | Csn1s2a          | -1.2  | 0.524 | -2.31 | 0.030 | 1.34  | 0.601 | -1.37 | 0.280 | -1.14 | 0.448 |
| 1428303_at   | RIKEN cDNA 1500005I02 gene                                      | 1500005I02Rik    | -1.53 | 0.160 | -2.32 | 0.029 | 2.23  | 0.218 | -1.19 | 0.352 | 1.61  | 0.375 |
| 1426096_at   | protein arginine N-methyltransferase 7                          | Prmt7            | -1.89 | 0.096 | -2.32 | 0.008 | 1.62  | 0.477 | 1.4   | 0.598 | -1.17 | 0.255 |
| 1429197_s_at | RAB GTPase activating protein 1-like                            | Rabgap11         | -1.8  | 0.008 | -2.32 | 0.006 | -1.41 | 0.160 | -1.5  | 0.005 | -1.61 | 0.052 |
| 1425388_a_at | thiamine pyrophosphokinase                                      | Tpk1             | -1.26 | 0.057 | -2.32 | 0.003 | -1.05 | 0.558 | -1.38 | 0.032 | -1.32 | 0.042 |
| 1444035_at   | mesoderm development candiate 2                                 | Mesdc2           | -1.05 | 0.648 | -2.33 | 0.047 | 1.37  | 0.615 | 2.11  | 0.494 | 1.49  | 0.704 |
| 1431888_s_at | pregnancy-specific glycoprotein 21                              | Psg21            | -1.76 | 0.073 | -2.33 | 0.018 | 1.47  | 0.441 | 2.65  | 0.091 | -1.15 | 0.340 |
| 1433118_at   | RIKEN cDNA 2300004M11 gene                                      | 2300004M11Rik    | -1.33 | 0.411 | -2.34 | 0.022 | 2.33  | 0.339 | 1.84  | 0.271 | 2.38  | 0.098 |
| 1437429_at   | RIKEN cDNA 5930437A14 gene                                      | 5930437A14Rik    | -1.08 | 0.419 | -2.34 | 0.004 | -1.18 | 0.174 | -1.1  | 0.536 | -1.46 | 0.018 |
| 1420778_at   | taste receptor, type 1, member 3                                | Tas1r3           | -2.55 | 0.041 | -2.34 | 0.045 | -1.33 | 0.398 | -1.53 | 0.323 | 1.52  | 0.875 |
| 1420080_a_at | glutamine fructose-6-phosphate transaminase 1                   | Gfpt1            | 1.03  | 0.954 | -2.35 | 0.001 | 1.53  | 0.440 | -1.07 | 0.598 | -1.48 | 0.018 |
| 1435349_at   | neuropilin 2                                                    | Nrp2             | -1.16 | 0.184 | -2.35 | 0.024 | -1.34 | 0.119 | -1.45 | 0.010 | -1.58 | 0.001 |
| 1436907_at   | neuron navigator 1                                              | Nav1             | -1.15 | 0.110 | -2.36 | 0.006 | -1.37 | 0.019 | -1.58 | 0.000 | -1.81 | 0.002 |
| 1425606_at   | solute carrier family 5 (iodide transporter), member 8          | Slc5a8           | -1.43 | 0.146 | -2.36 | 0.006 | 1.47  | 0.407 | 1.18  | 0.602 | 1.04  | 0.669 |
| 1432484_at   | RIKEN cDNA 2310061C15 gene                                      | 2310061C15Rik    | -1.46 | 0.146 | -2.37 | 0.038 | 1.19  | 0.673 | 1.57  | 0.039 | 2.08  | 0.449 |
| 1431631_at   | RIKEN cDNA 2900057B20 gene                                      | 2900057B20Rik    | -1.7  | 0.158 | -2.37 | 0.045 | 1.13  | 0.841 | -1.1  | 0.384 | -2.08 | 0.097 |
| 1454332_at   | RIKEN cDNA 6030442H21 gene                                      | 6030442H21Rik    | -1.14 | 0.658 | -2.37 | 0.047 | 1.08  | 0.872 | 1.57  | 0.854 | 1.47  | 0.885 |
| 1443574_at   | hypothetical protein 6530439I21                                 | 6530439I21       | -1.59 | 0.153 | -2.37 | 0.011 | -1.02 | 0.528 | -1.4  | 0.247 | 1.56  | 0.891 |
| 1433939_at   | hypothetical protein A730046J16                                 | A730046J16       | -1.3  | 0.090 | -2.39 | 0.020 | -1.19 | 0.151 | -1.53 | 0.014 | -1.72 | 0.005 |
| 1420589_at   | hyaluronan synthase 3                                           | Has3             | -1.71 | 0.201 | -2.39 | 0.007 | -1.42 | 0.121 | 1     | 0.684 | 1.16  | 0.359 |
| 1450945_at   | protein kinase C, alpha                                         | Prkca            | 1.16  | 0.926 | -2.39 | 0.042 | -2.09 | 0.001 | -2.13 | 0.001 | -2.58 | 0.005 |
| 1441964_at   | RIKEN cDNA 1110003F05 gene                                      | 1110003F05Rik    | 1.23  | 0.566 | -2.4  | 0.002 | 1.82  | 0.568 | -1.5  | 0.166 | -1.48 | 0.116 |
| 1437558_at   | RIKEN cDNA B130021B11 gene                                      | B130021B11Rik    | 1.1   | 0.468 | -2.41 | 0.017 | -1.48 | 0.070 | -1.5  | 0.080 | -1.75 | 0.017 |
| 1441256_at   | Wdr45 like                                                      | Wdr45l           | -1.25 | 0.411 | -2.41 | 0.018 | -1.41 | 0.280 | -1.84 | 0.122 | 1.02  | 0.906 |
| 1450536_s_at | keratin associated protein 12-1                                 | Krtap12-1        | -1.22 | 0.261 | -2.42 | 0.005 | 1.06  | 0.743 | -1.11 | 0.299 | -1.31 | 0.301 |
| 1451054_at   | orosomucoid 1                                                   | Orm1             | -2.8  | 0.054 | -2.42 | 0.008 | 1.41  | 0.341 | -1.49 | 0.137 | 1.55  | 0.255 |
| 1426455_at   | serologically defined colon cancer antigen 10                   | Sdccag10         | -1.26 | 0.198 | -2.42 | 0.018 | -1.52 | 0.077 | -1.58 | 0.034 | -1.51 | 0.059 |
| 1443870_at   | ATP-binding cassette, sub-family C (CFTR/MRP), member 4         | Abcc4            | -1.38 | 0.031 | -2.43 | 0.034 | -1.39 | 0.004 | -1.25 | 0.012 | -1.34 | 0.049 |
| 1449900_at   | galactosylceramidase                                            | Galc             | 1.18  | 0.041 | -2.43 | 0.009 | -1.47 | 0.091 | 1.56  | 0.338 | -1.05 | 0.537 |
| 1451382_at   | ChaC, cation transport regulator-like 1 (E. coli)               | Chac1            | -1.22 | 0.007 | -2.44 | 0.001 | -1.18 | 0.052 | -1.24 | 0.002 | -1.32 | 0.001 |
| 1442998_at   | Cytidine 5'-triphosphate synthase 2                             | Ctps2            | 1.03  | 0.830 | -2.45 | 0.037 | 2.53  | 0.509 | 1.62  | 0.025 | 2.34  | 0.076 |
| 1428579_at   | formin-like 2                                                   | Fmnl2            | 1.26  | 0.449 | -2.45 | 0.034 | -1.45 | 0.031 | -1.49 | 0.007 | -1.81 | 0.018 |
| 1439618_at   | phosphodiesterase 10A                                           | Pde10a           | -1.04 | 0.537 | -2.45 | 0.032 | -1.29 | 0.133 | -1.68 | 0.068 | -1.28 | 0.292 |
| 1445588_at   | ankyrin repeat domain 44                                        | Ankrd44          | 1.08  | 0.757 | -2.46 | 0.018 | -1.54 | 0.181 | 1.68  | 0.938 | 2.75  | 0.068 |
| 1426546_at   | testis-specific kinase 2                                        | Tesk2            | -1.22 | 0.228 | -2.46 | 0.000 | -1.05 | 0.513 | 1     | 0.856 | -1.03 | 0.725 |
| 1450063_at   | formin 2                                                        | Fmn2             | -1.57 | 0.024 | -2.47 | 0.003 | -1.77 | 0.006 | -1.48 | 0.012 | -1.74 | 0.007 |
| 1435234_at   | nuclear receptor coactivator 2                                  | Ncoa2            | -1.13 | 0.235 | -2.47 | 0.031 | 1.01  | 0.584 | -1.73 | 0.014 | -1.55 | 0.122 |
| 1460340_at   | piwi-like homolog 1 (Drosophila)                                | Piwi1            | -1.48 | 0.191 | -2.47 | 0.042 | -1.18 | 0.229 | 1     | 0.770 | 1     | 0.735 |
| 1443127_at   | RIKEN cDNA 9630021D06 gene                                      | 9630021D06Rik    | -1.26 | 0.290 | -2.48 | 0.047 | -1.35 | 0.237 | -1.59 | 0.075 | 1.58  | 0.153 |
| 1454043_a_at | potassium voltage-gated channel, shaker-related subfamily, t    | Kcnab1           | -1.46 | 0.292 | -2.48 | 0.033 | -1.53 | 0.171 | -1.05 | 0.541 | -1.69 | 0.143 |
| 1457682_at   | RIKEN cDNA 9030420J04 gene                                      | 9030420J04Rik    | -1.07 | 0.466 | -2.49 | 0.032 | -1.49 | 0.127 | -1.76 | 0.032 | -1.55 | 0.064 |
| 1455962_at   | hedgehog acyltransferase                                        | Hhat             | -1.07 | 0.379 | -2.5  | 0.005 | 1.1   | 0.752 | -1.41 | 0.059 | -1.33 | 0.104 |
| 1437542_at   | RIKEN cDNA A730095J18 gene                                      | A730095J18Rik    | -1.01 | 0.715 | -2.51 | 0.023 | -1.08 | 0.350 | -1.52 | 0.008 | -1.51 | 0.043 |
| 1421752_a_at | serine (or cysteine) peptidase inhibitor, clade B, member 5     | Serpib5          | -1.65 | 0.003 | -2.52 | 0.004 | 1.76  | 0.862 | 2.43  | 0.761 | 1     | 0.732 |
| 1452222_at   | utrophin                                                        | Utrn             | -1.22 | 0.149 | -2.52 | 0.017 | -1.94 | 0.006 | -1.74 | 0.003 | -2.28 | 0.007 |
| 1443896_at   | TBC1 domain family, member 5                                    | Tbc1d5           | -1.07 | 0.568 | -2.53 | 0.002 | -1.67 | 0.015 | -1.32 | 0.087 | -1.8  | 0.003 |
| 1437556_at   | zinc finger homeodomain 4                                       | Zfx4             | 1.16  | 0.224 | -2.53 | 0.001 | -1.04 | 0.694 | -1.44 | 0.010 | -1.57 | 0.007 |
| 1456636_at   | RIKEN cDNA 4930414L22 gene                                      | 4930414L22Rik    | -2.33 | 0.055 | -2.54 | 0.044 | 1.03  | 0.623 | 1.48  | 0.804 | 1.17  | 0.653 |
| 1439333_at   | potassium channel, subfamily V, member 1                        | Kcnv1            | -2.68 | 0.007 | -2.55 | 0.014 | 1.56  | 0.926 | 2.87  | 0.001 | 1.21  | 0.921 |
| 1419249_at   | PFTAIRE protein kinase 1                                        | Pftk1            | 1.03  | 0.439 | -2.55 | 0.043 | -1.68 | 0.003 | -1.76 | 0.007 | -2.17 | 0.015 |
| 1459056_at   | RAS protein-specific guanine nucleotide-releasing factor 1      | Rasgrf1          | -1.29 | 0.201 | -2.55 | 0.013 | 2.22  | 0.175 | -1.58 | 0.152 | 1.02  | 0.896 |
| 1426147_s_at | claudin 10                                                      | Cldn10           | -2.09 | 0.017 | -2.56 | 0.008 | 1.36  | 0.863 | -1.32 | 0.279 | 1.11  | 0.898 |
| 1456069_at   | dystrobrevin alpha                                              | Dtna             | -1.02 | 0.741 | -2.56 | 0.003 | -1.07 | 0.487 | -1.36 | 0.185 | -1.58 | 0.123 |
| 1419724_at   | ectodysplasin-A receptor /// similar to Tumor necrosis factor r | Edar /// LOC6690 | -3.33 | 0.021 | -2.56 | 0.045 | 1.54  | 0.985 | 2.9   | 0.360 | -1.47 | 0.251 |
| 1424092_at   | erythrocyte protein band 4.1                                    | Ep4.1            | -1.05 | 0.771 | -2.56 | 0.003 | -1.45 | 0.115 | -1.05 | 0.441 | -1.35 | 0.124 |
| 1438666_at   | low density lipoprotein receptor class A domain containing 3    | Ldlrad3          | -1.09 | 0.260 | -2.56 | 0.005 | -1.18 | 0.421 | -1.59 | 0.007 | -1.84 | 0.013 |

|              |                                                              |               |       |       |       |       |       |       |       |       |       |       |
|--------------|--------------------------------------------------------------|---------------|-------|-------|-------|-------|-------|-------|-------|-------|-------|-------|
| 1451236_at   | RAS-like, estrogen-regulated, growth-inhibitor               | Rerg          | 1.06  | 0.977 | -2.56 | 0.017 | -1.41 | 0.126 | -1.96 | 0.008 | -1.55 | 0.087 |
| 1429271_at   | RIKEN cDNA 9130011E15 gene                                   | 9130011E15Rik | -1.08 | 0.727 | -2.57 | 0.004 | -1.29 | 0.205 | -1.83 | 0.113 | -1.19 | 0.403 |
| 1430921_at   | RIKEN cDNA 9130015G15 gene                                   | 9130015G15Rik | -1.71 | 0.129 | -2.59 | 0.035 | -2.76 | 0.053 | 1.33  | 0.762 | 1.04  | 0.475 |
| 1456715_at   | Pam, highwire, rpm 1                                         | Phr1          | 1.36  | 0.291 | -2.59 | 0.022 | 1.05  | 0.603 | -1.61 | 0.028 | -1.47 | 0.302 |
| 1429995_at   | RIKEN cDNA 1700036D21 gene                                   | 1700036D21Rik | -2.28 | 0.071 | -2.61 | 0.008 | 1.5   | 0.579 | 1.08  | 0.644 | 1.89  | 0.425 |
| 1424586_at   | EH domain binding protein 1                                  | Ehbp1         | -1.19 | 0.028 | -2.61 | 0.004 | -1.37 | 0.008 | -1.44 | 0.014 | -1.71 | 0.031 |
| 1434179_at   | myeloid/lymphoid or mixed-lineage leukemia 3                 | MLL3          | -1.06 | 0.375 | -2.61 | 0.014 | -1.32 | 0.046 | -1.36 | 0.017 | -1.88 | 0.009 |
| 1449520_at   | tetratricopeptide repeat domain 28                           | Ttc28         | -1.28 | 0.065 | -2.61 | 0.020 | -1.74 | 0.010 | -1.92 | 0.002 | -2.11 | 0.036 |
| 1436764_at   | par-3 (partitioning defective 3) homolog (C. elegans)        | Pard3         | 1.33  | 0.473 | -2.62 | 0.028 | -1.75 | 0.004 | -1.7  | 0.000 | -1.97 | 0.074 |
| 1449815_a_at | single-stranded DNA binding protein 2                        | Ssbp2         | -1.2  | 0.017 | -2.62 | 0.010 | -1.42 | 0.033 | -1.2  | 0.086 | -1.4  | 0.001 |
| 1436031_at   | cache domain containing 1                                    | Cachd1        | -1.26 | 0.126 | -2.63 | 0.036 | -1.18 | 0.118 | -1.13 | 0.307 | -1.37 | 0.035 |
| 1436047_at   | gene model 672, (NCBI)                                       | Gm672         | -1.12 | 0.226 | -2.63 | 0.015 | -1.69 | 0.000 | -2.21 | 0.001 | -2.44 | 0.000 |
| 1455179_at   | membrane protein, palmitoylated 7 (MAGUK p55 subfamily n     | Mpp7          | 1.18  | 0.815 | -2.63 | 0.004 | -1.12 | 0.402 | -1.29 | 0.110 | -1.41 | 0.010 |
| 1449876_at   | protein kinase, cGMP-dependent, type I                       | Prkg1         | -1.69 | 0.071 | -2.63 | 0.025 | -1.89 | 0.006 | -1.42 | 0.085 | -1.45 | 0.112 |
| 1439564_at   | RIKEN cDNA 1700090G07 gene                                   | 1700090G07Rik | -2.45 | 0.018 | -2.64 | 0.036 | -1.31 | 0.417 | 1.54  | 0.993 | -1.17 | 0.526 |
| 1423147_at   | methionine adenosyltransferase I, alpha                      | Mat1a         | -1.19 | 0.475 | -2.64 | 0.010 | -1.1  | 0.592 | -1.01 | 0.818 | 1.09  | 0.908 |
| 1444020_at   | chondroitin sulfate proteoglycan 3                           | Cspg3         | -1.99 | 0.073 | -2.65 | 0.034 | 1.47  | 0.401 | 1.2   | 0.456 | 1.31  | 0.943 |
| 1419811_at   | DNA segment, Chr 16, Wayne State University 65, expressed    | D16Wsu65e     | -1.22 | 0.313 | -2.65 | 0.018 | -1.06 | 0.708 | 1.06  | 0.474 | 1.51  | 0.369 |
| 1455879_at   | GCN1 general control of amino-acid synthesis 1-like 1 (yeast | Gcn11         | -1.34 | 0.445 | -2.65 | 0.019 | -1.13 | 0.486 | 1.88  | 0.423 | 3.17  | 0.729 |
| 1451764_at   | MARVEL (membrane-associating) domain containing 3            | Marveld3      | -1.37 | 0.086 | -2.65 | 0.003 | 2.16  | 0.040 | 1.11  | 0.861 | 1.76  | 0.085 |
| 1428900_s_at | methyltransferase 5 domain containing 1                      | Mett5d1       | -1.36 | 0.125 | -2.65 | 0.017 | -1.2  | 0.142 | -1.25 | 0.087 | -1.26 | 0.049 |
| 1423953_at   | CDK5 regulatory subunit associated protein 1-like 1          | Cdkal1        | -1.2  | 0.092 | -2.66 | 0.005 | -1.95 | 0.005 | -1.74 | 0.017 | -2.14 | 0.019 |
| 1422944_a_at | diaphanous homolog 3 (Drosophila)                            | Diap3         | -1.46 | 0.136 | -2.67 | 0.017 | -1.86 | 0.010 | -1.51 | 0.109 | -1.53 | 0.041 |
| 1451279_at   | ELKS/RAB6-interacting/CAST family member 1                   | Erc1          | -1.21 | 0.161 | -2.67 | 0.006 | -1.54 | 0.012 | -1.96 | 0.011 | -2.03 | 0.004 |
| 1433638_s_at | homeo box D8                                                 | Hoxd8         | -2.3  | 0.051 | -2.67 | 0.007 | 1.41  | 0.483 | -2.05 | 0.051 | 1.29  | 0.060 |
| 1435879_at   | thymoma viral proto-oncogene 3                               | Akt3          | -1.12 | 0.272 | -2.7  | 0.030 | -1.51 | 0.004 | -1.37 | 0.010 | -1.65 | 0.005 |
| 1444085_at   | prenyl (solanesyl) diphosphate synthase, subunit 2           | Pdss2         | -1.39 | 0.111 | -2.7  | 0.050 | -1.5  | 0.038 | -1.35 | 0.062 | -1.18 | 0.171 |
| 1456495_s_at | oxysterol binding protein-like 6                             | Osbpl6        | -1.22 | 0.036 | -2.72 | 0.017 | 1.15  | 0.868 | 1.03  | 0.681 | 1.29  | 0.652 |
| 1422673_at   | protein kinase C, mu                                         | Prkcm         | -1.38 | 0.174 | -2.74 | 0.022 | -1.27 | 0.036 | -1.55 | 0.003 | -1.53 | 0.045 |
| 1438149_at   | Expressed sequence AI449441                                  | AI449441      | -1.41 | 0.269 | -2.76 | 0.043 | 2.84  | 0.009 | 1.16  | 0.937 | -1.25 | 0.493 |
| 1424358_at   | ubiquitin-conjugating enzyme E2E 2 (UBC4/5 homolog, yeast)   | Ube2e2        | -1.34 | 0.163 | -2.76 | 0.034 | -1.43 | 0.014 | -1.63 | 0.000 | -1.7  | 0.001 |
| 1439341_at   | cDNA sequence AK220484                                       | AK220484      | -1.18 | 0.095 | -2.77 | 0.003 | 1.15  | 0.007 | -1.2  | 0.379 | 1.18  | 0.601 |
| 1452071_at   | solute carrier family 4 (anion exchanger), member 4          | Slc4a4        | -1.49 | 0.187 | -2.77 | 0.008 | -1.31 | 0.104 | -1.35 | 0.132 | -1.28 | 0.055 |
| 1453331_at   | RIKEN cDNA 1700013H16 gene                                   | 1700013H16Rik | -1.15 | 0.477 | -2.78 | 0.039 | 2.02  | 0.725 | 1.08  | 0.694 | 2.1   | 0.608 |
| 1432243_a_at | RIKEN cDNA 4933433G15 gene                                   | 4933433G15Rik | -3.66 | 0.069 | -2.78 | 0.003 | 1.04  | 0.618 | 2.05  | 0.480 | -1.15 | 0.349 |
| 1445720_at   | SAFB-like, transcription modulator                           | Sltm          | -1.46 | 0.187 | -2.78 | 0.030 | 1.22  | 0.761 | 2.96  | 0.148 | 1.04  | 0.967 |
| 1428643_at   | mannoside acetylglucosaminyltransferase 5                    | Mgat5         | -1.35 | 0.080 | -2.8  | 0.007 | -1.41 | 0.061 | -1.57 | 0.005 | -2.13 | 0.025 |
| 1452366_at   | RIKEN cDNA 4732435N03 gene                                   | 4732435N03Rik | -1.29 | 0.286 | -2.82 | 0.035 | -1.64 | 0.017 | -1.55 | 0.003 | -1.94 | 0.000 |
| 1441277_s_at | protein tyrosine phosphatase, receptor type, K               | Ptpkr         | -1.38 | 0.094 | -2.82 | 0.009 | 1.03  | 0.833 | -1.32 | 0.097 | -1.33 | 0.329 |
| 1427484_at   | echinoderm microtubule associated protein like 5             | Eml5          | -1.06 | 0.959 | -2.83 | 0.007 | 1.36  | 0.100 | -1.19 | 0.308 | -1.01 | 0.205 |
| 1443738_at   | Phosphatidylserine synthase 2                                | Ptdss2        | -1.94 | 0.127 | -2.83 | 0.025 | 2.76  | 0.225 | -1.19 | 0.311 | 2.33  | 0.159 |
| 1440094_at   | cDNA sequence BC030870                                       | BC030870      | -3.07 | 0.021 | -2.84 | 0.018 | 1.96  | 0.528 | 2.1   | 0.698 | -1.54 | 0.151 |
| 1459319_at   | Polymerase (DNA directed), alpha 1                           | Pola1         | -1.02 | 0.991 | -2.84 | 0.020 | 1.35  | 0.632 | -1.05 | 0.436 | -1.53 | 0.251 |
| 1419300_at   | FMS-like tyrosine kinase 1                                   | Flt1          | -1.01 | 0.942 | -2.89 | 0.010 | -1.83 | 0.031 | -1.75 | 0.000 | 1.02  | 0.703 |
| 1458897_at   | uronyl-2-sulfotransferase                                    | Ust           | -1.41 | 0.010 | -2.9  | 0.007 | -1.2  | 0.102 | -1.41 | 0.087 | -1.25 | 0.086 |
| 1436910_at   | RAS protein activator like 2                                 | Rasal2        | 1.04  | 0.327 | -2.91 | 0.008 | -1.78 | 0.017 | -1.88 | 0.001 | -1.98 | 0.002 |
| 1428603_at   | glucocorticoid induced transcript 1                          | Glicci1       | -1.22 | 0.234 | -2.93 | 0.024 | -1.02 | 0.658 | -1.24 | 0.048 | -1.33 | 0.121 |
| 1424625_a_at | DENN/MADD domain containing 1A                               | Dennd1a       | -1.06 | 0.474 | -2.94 | 0.002 | -1.95 | 0.016 | -2.58 | 0.012 | -2.85 | 0.032 |
| 1438596_at   | HECT domain containing 2                                     | Hectd2        | -1.74 | 0.193 | -2.94 | 0.043 | 1.42  | 0.891 | 3.23  | 0.129 | 2.44  | 0.489 |
| 1432105_at   | sirtuin 5                                                    | Sirt5         | -1.26 | 0.407 | -2.95 | 0.001 | 1.29  | 0.869 | 2.12  | 0.297 | 1.42  | 0.998 |
| 1434669_at   | Ral GEF with PH domain and SH3 binding motif 1               | Ralgps1       | -1.03 | 0.654 | -2.96 | 0.008 | -1.05 | 0.660 | -1.21 | 0.225 | 1.1   | 0.654 |
| 1427043_s_at | cytosolic ovarian carcinoma antigen 1                        | Cova1         | -1.41 | 0.049 | -2.99 | 0.005 | -1.37 | 0.065 | -1.69 | 0.008 | -1.63 | 0.041 |
| 1440019_at   | G protein-coupled receptor 22                                | Gpr22         | -1.53 | 0.234 | -2.99 | 0.004 | 1.16  | 0.848 | 1.78  | 0.206 | -1.91 | 0.102 |
| 1428486_at   | RIKEN cDNA 1700123L14 gene                                   | 1700123L14Rik | -2.26 | 0.081 | -3.01 | 0.027 | 1.43  | 0.686 | -1.4  | 0.184 | 1.06  | 0.992 |
| 1446757_at   | SGT1, suppressor of G2 allele of SKP1 (S. cerevisiae)        | Sugt1         | -1.94 | 0.041 | -3.01 | 0.011 | -1.02 | 0.863 | 1.95  | 0.129 | -1.29 | 0.294 |
| 1455979_at   | AT rich interactive domain 1B (Swi1 like)                    | Arid1b        | -1.36 | 0.229 | -3.04 | 0.030 | -1.49 | 0.017 | -2.25 | 0.001 | -2.03 | 0.009 |
| 1436294_at   | ankyrin repeat domain 29                                     | Ankrd29       | -1.3  | 0.376 | -3.06 | 0.010 | -1.08 | 0.474 | 1.48  | 0.798 | 1.95  | 0.834 |
| 1437318_at   | p21 (CDKN1A)-activated kinase 3                              | Pak3          | -1.1  | 0.414 | -3.06 | 0.036 | -1.46 | 0.017 | -1.68 | 0.009 | -2.02 | 0.064 |



|              |                                                        |                  |       |       |       |       |       |       |       |       |       |       |
|--------------|--------------------------------------------------------|------------------|-------|-------|-------|-------|-------|-------|-------|-------|-------|-------|
| 1440586_at   | RIKEN cDNA B430203I24 gene                             | B430203I24Rik    | -1.89 | 0.031 | -3.07 | 0.041 | -1.74 | 0.111 | 3.59  | 0.832 | -2.05 | 0.137 |
| 1431243_at   | RIKEN cDNA 1700120J03 gene                             | 1700120J03Rik    | 1.18  | 0.150 | -3.08 | 0.017 | 1.06  | 0.605 | -1.18 | 0.409 | -1.8  | 0.159 |
| 1459971_at   | Potassium channel, subfamily T, member 2               | Kcnt2            | -3.31 | 0.007 | -3.11 | 0.014 | 1.36  | 0.980 | 1.02  | 0.837 | 1.6   | 0.953 |
| 1429064_at   | DIP2 disco-interacting protein 2 homolog C             | Dip2c            | -1.44 | 0.104 | -3.12 | 0.032 | -1.41 | 0.002 | -1.55 | 0.004 | -1.99 | 0.008 |
| 1459998_at   | zinc finger protein 407                                | Zfp407           | 1.05  | 0.681 | -3.13 | 0.001 | -1.74 | 0.002 | -2.18 | 0.004 | -2.23 | 0.012 |
| 1427292_at   | immunoglobulin lambda chain, variable 1                | Igl-V1           | -1.9  | 0.050 | -3.15 | 0.016 | 1.08  | 0.664 | 2.86  | 0.435 | 2.85  | 0.005 |
| 1429987_at   | RIKEN cDNA 9930013L23 gene                             | 9930013L23Rik    | -1.29 | 0.007 | -3.17 | 0.004 | -2.03 | 0.006 | -1.74 | 0.000 | -2.44 | 0.008 |
| 1440214_at   | RIKEN cDNA A630001G21 gene                             | A630001G21Rik    | -1.24 | 0.335 | -3.17 | 0.008 | 1.55  | 0.934 | 1.77  | 0.683 | 1.34  | 0.939 |
| 1438730_at   | cDNA sequence BC028801                                 | BC028801         | -1.18 | 0.257 | -3.23 | 0.032 | -1.51 | 0.152 | -1.37 | 0.056 | -1.66 | 0.040 |
| 1422541_at   | protein tyrosine phosphatase, receptor type, M         | Ptprm            | -1.47 | 0.055 | -3.24 | 0.022 | -1.9  | 0.005 | -1.86 | 0.004 | -2.27 | 0.004 |
| 1424588_at   | SLIT-ROBO Rho GTPase activating protein 3              | Srgap3           | -1.21 | 0.287 | -3.26 | 0.022 | -1.62 | 0.011 | -1.92 | 0.002 | -2.04 | 0.022 |
| 1435461_at   | membrane associated guanylate kinase 3                 | Magi3            | -1.16 | 0.207 | -3.3  | 0.018 | -1.37 | 0.020 | -1.46 | 0.094 | -1.68 | 0.004 |
| 1460508_at   | mitochondrial ribosomal protein L1                     | Mrpl1            | -1.29 | 0.282 | -3.3  | 0.011 | -1.93 | 0.035 | 1.91  | 0.083 | -1.76 | 0.122 |
| 1439557_s_at | LIM domain binding 2                                   | Ldb2             | -1.68 | 0.129 | -3.35 | 0.005 | 1.58  | 0.374 | -1.26 | 0.321 | 1.55  | 0.603 |
| 1448443_at   | serine (or cysteine) peptidase inhibitor 1             | Serpini1         | -2.09 | 0.001 | -3.42 | 0.005 | 2.14  | 0.536 | 2.54  | 0.667 | 1.23  | 0.611 |
| 1434582_at   | DNA segment, Chr 14, ERATO Doi 171, expressed          | D14ErtD171e      | -2.2  | 0.031 | -3.44 | 0.041 | -2.08 | 0.048 | -1.68 | 0.048 | -2.95 | 0.032 |
| 1457790_at   | Ankyrin repeat and SOCS box-containing protein 3       | Asb3             | 1.08  | 0.759 | -3.48 | 0.023 | -1.25 | 0.109 | -1.87 | 0.024 | 1.11  | 0.627 |
| 1451804_s_at | leucine rich repeat containing 16                      | Lrrc16           | 1     | 0.759 | -3.49 | 0.004 | -1.37 | 0.018 | -1.96 | 0.005 | -1.71 | 0.014 |
| 1431682_at   | RIKEN cDNA 4930594C11 gene                             | 4930594C11Rik    | -1.6  | 0.332 | -3.55 | 0.031 | 2.21  | 0.977 | -1.98 | 0.088 | -1.04 | 0.622 |
| 1417318_at   | deleted in bladder cancer 1 (human)                    | Dbc1             | -1.37 | 0.141 | -3.6  | 0.020 | -1.99 | 0.004 | -1.84 | 0.008 | -2.43 | 0.006 |
| 1452761_s_at | RIKEN cDNA 8430436O14 gene                             | 8430436O14Rik    | -1.56 | 0.106 | -3.62 | 0.026 | -2.22 | 0.011 | -1.72 | 0.001 | -2.49 | 0.014 |
| 1440719_at   | GLE1 RNA export mediator-like (yeast)                  | Gle1l            | -1.7  | 0.080 | -3.65 | 0.003 | -1.09 | 0.251 | -1.23 | 0.265 | -1.01 | 0.993 |
| 1447605_at   | Zinc finger protein 457                                | Zfp457           | -1.58 | 0.258 | -3.68 | 0.039 | -4.24 | 0.000 | 1.92  | 0.242 | -1.21 | 0.525 |
| 1437201_at   | leucine rich repeat containing 4C                      | Lrrc4c           | -1.26 | 0.266 | -3.7  | 0.014 | -1.38 | 0.012 | -1.53 | 0.005 | -1.52 | 0.076 |
| 1455204_at   | phosphatidylinositol transfer protein, cytoplasmic 1   | Pitpnc1          | -1.07 | 0.436 | -3.71 | 0.010 | -1.77 | 0.040 | -2.02 | 0.012 | -2.17 | 0.007 |
| 1435981_at   | RIKEN cDNA E430014L09 gene                             | E430014L09Rik    | -1.1  | 0.496 | -3.72 | 0.001 | -2.15 | 0.001 | -3.24 | 0.000 | -3.68 | 0.001 |
| 1443073_at   | hypothetical protein LOC545681                         | LOC545681        | 1.18  | 0.948 | -3.79 | 0.021 | -1.3  | 0.218 | 1.47  | 0.205 | 1.69  | 0.992 |
| 1444168_at   | xenotropic and polytropic retrovirus receptor 1        | Xpr1             | -1.41 | 0.422 | -3.86 | 0.040 | 2.37  | 0.231 | 1.22  | 0.881 | -1.47 | 0.211 |
| 1434932_at   | adenosine deaminase, RNA-specific, B1                  | Adarb1           | 1.56  | 0.599 | -3.87 | 0.025 | -2.05 | 0.044 | -1.38 | 0.002 | -1.34 | 0.323 |
| 1438473_at   | ADP-ribosylation factor-like 15                        | Arl15            | 1.48  | 0.871 | -3.88 | 0.021 | -1.77 | 0.011 | -1.64 | 0.059 | -1.74 | 0.054 |
| 1429809_at   | transme/ne and tetra/peptide repeat 2                  | Tmtc2            | -1.71 | 0.039 | -3.89 | 0.037 | -1.84 | 0.000 | -1.63 | 0.044 | -2    | 0.061 |
| 1437393_at   | expressed sequence AI875142                            | AI875142         | -1.31 | 0.125 | -3.91 | 0.004 | -2.18 | 0.001 | -2.12 | 0.006 | -2.46 | 0.005 |
| 1450932_s_at | dedicator of cytokinesis 9                             | Dock9 /// LOC670 | 1.06  | 0.582 | -3.95 | 0.010 | -1.3  | 0.114 | -1.47 | 0.005 | -1.76 | 0.006 |
| 1438531_at   | RIKEN cDNA A730054J21 gene                             | A730054J21Rik    | -1.34 | 0.080 | -3.96 | 0.006 | -2.15 | 0.001 | -2.14 | 0.003 | -2.72 | 0.004 |
| 1436405_at   | dedicator of cytokinesis 4                             | Dock4            | -1.43 | 0.089 | -3.97 | 0.026 | -1.18 | 0.251 | -1.83 | 0.053 | -1.29 | 0.152 |
| 1458407_s_at | Expressed sequence AI429294                            | AI429294         | -1.24 | 0.345 | -4    | 0.046 | -1.12 | 0.398 | -1.99 | 0.067 | -1.22 | 0.197 |
| 1453286_at   | plexin A2                                              | Plxna2           | -1.08 | 0.544 | -4.11 | 0.016 | -1.17 | 0.129 | -1.37 | 0.144 | -1.65 | 0.002 |
| 1437667_a_at | BTB and CNC homology 2                                 | Bach2            | -1.18 | 0.294 | -4.19 | 0.025 | -2.06 | 0.006 | -2.17 | 0.003 | -2.31 | 0.063 |
| 1427564_at   | diaphanous homolog 2 (Drosophila)                      | Diap2            | -1.62 | 0.060 | -4.29 | 0.032 | -2.65 | 0.025 | -1.57 | 0.072 | -3.92 | 0.023 |
| 1431110_at   | RIKEN cDNA 5430431D22 gene                             | 5430431D22Rik    | -1.28 | 0.197 | -4.34 | 0.012 | -1.93 | 0.004 | -1.85 | 0.023 | -1.89 | 0.015 |
| 1437312_at   | bone morphogenetic protein receptor, type 1B           | Bmpr1b           | 1.56  | 0.907 | -4.36 | 0.038 | -1.48 | 0.160 | -2.17 | 0.001 | -1.75 | 0.017 |
| 1429417_at   | RIKEN cDNA 4833446K15 gene                             | 4833446K15Rik    | -1.34 | 0.062 | -4.38 | 0.016 | -1.62 | 0.080 | -2.05 | 0.003 | -2.67 | 0.001 |
| 1417435_at   | like-glycosyltransferase                               | Large            | -1.14 | 0.255 | -4.38 | 0.003 | -2.64 | 0.009 | -2.16 | 0.002 | -3.49 | 0.001 |
| 1434515_at   | nuclear receptor coactivator 1                         | Ncoa1            | -1.09 | 0.426 | -4.38 | 0.008 | -1.15 | 0.257 | -1.61 | 0.057 | -1.42 | 0.083 |
| 1452860_at   | F-box and leucine-rich repeat protein 17               | Fbxl17           | -1.28 | 0.074 | -4.57 | 0.011 | -1.87 | 0.000 | -2.24 | 0.002 | -2.52 | 0.000 |
| 1442175_at   | RIKEN cDNA C030027H14 gene                             | C030027H14Rik    | -1.31 | 0.060 | -4.62 | 0.014 | -1.48 | 0.005 | -1.6  | 0.022 | -1.78 | 0.019 |
| 1436937_at   | RNA binding motif, single stranded interacting protein | Rbms3            | -1.53 | 0.158 | -4.64 | 0.027 | -2.33 | 0.002 | -2    | 0.013 | -2.53 | 0.015 |
| 1425819_at   | zinc finger and BTB domain containing 7C               | Zbtb7c           | -1.61 | 0.120 | -4.68 | 0.037 | 1.12  | 0.664 | 1.4   | 0.580 | 1.02  | 0.832 |
| 1430316_at   | RIKEN cDNA 4930579E17 gene                             | 4930579E17Rik    | -1.23 | 0.145 | -4.72 | 0.003 | -1.17 | 0.251 | -1.26 | 0.065 | -1.93 | 0.001 |
| 1452342_at   | amyloid beta (A4) precursor                            | Apbp2            | -1.24 | 0.242 | -4.81 | 0.045 | -2.12 | 0.007 | -2.59 | 0.000 | -2.8  | 0.010 |
| 1452878_at   | protein kinase C, epsilon                              | Prkce            | -1.75 | 0.015 | -5.11 | 0.011 | -1.19 | 0.204 | -1.78 | 0.034 | -1.69 | 0.021 |
| 1438294_at   | ataxin 1                                               | Atxn1            | 1     | 0.863 | -5.21 | 0.001 | -2.99 | 0.004 | -3.03 | 0.001 | -3.85 | 0.010 |
| 1452050_at   | calcium/calmodulin-dependent protein kinase ID         | Camk1d           | -2.14 | 0.028 | -5.47 | 0.022 | -1.24 | 0.338 | -2.13 | 0.093 | -3.12 | 0.002 |
| 1457239_at   | Spleen tyrosine kinase                                 | Syk              | -1.88 | 0.022 | -5.5  | 0.001 | 4.44  | 0.076 | 1.09  | 0.745 | 1.46  | 0.582 |
| 1436513_at   | tetra/peptide repeat, ankyrin repeat coiled-coil 2     | Tanc2            | -1.2  | 0.128 | -5.67 | 0.022 | -1.44 | 0.082 | -1.61 | 0.098 | -2.06 | 0.005 |
| 1436515_at   | RIKEN cDNA E030004N02 gene                             | E030004N02Rik    | -1.01 | 0.682 | -5.74 | 0.001 | -1.46 | 0.218 | -2.17 | 0.026 | -2.54 | 0.032 |
| 1416301_a_at | early B-cell factor 1                                  | Ebf1             | -1.39 | 0.153 | -5.85 | 0.015 | -2.73 | 0.000 | -2.68 | 0.008 | -3.54 | 0.002 |
| 1456423_at   | methyl-CpG binding domain protein 5                    | Mbd5             | -1.34 | 0.162 | -6.08 | 0.005 | -2.29 | 0.026 | -2.69 | 0.001 | -2.88 | 0.005 |

|              |                                                |               |       |       |       |       |       |       |       |       |       |       |
|--------------|------------------------------------------------|---------------|-------|-------|-------|-------|-------|-------|-------|-------|-------|-------|
| 1456220_at   | F-box and leucine-rich repeat protein 7        | Fbxl7         | 1     | 0.539 | -6.34 | 0.021 | -1.82 | 0.043 | -2.23 | 0.000 | -2.13 | 0.005 |
| 1434639_at   | kelch repeat and BTB (POZ) domain containing 9 | Kbtbd9        | -1.15 | 0.176 | -6.56 | 0.031 | -1.84 | 0.006 | -2.04 | 0.010 | -1.98 | 0.107 |
| 1429063_s_at | kinesin family member 16B                      | Kif16b        | -1.31 | 0.259 | -6.74 | 0.022 | -1.24 | 0.046 | -1.72 | 0.000 | -2.03 | 0.053 |
| 1449314_at   | zinc finger protein, multitype 2               | Zfpn2         | -1.07 | 0.482 | -8.16 | 0.005 | -2.11 | 0.007 | -2.19 | 0.002 | -2.66 | 0.026 |
| 1453577_at   | RIKEN cDNA 2610018I03 gene                     | 2610018I03Rik | -1.16 | 0.248 | -8.8  | 0.008 | 1.51  | 0.363 | -1.19 | 0.395 | -1.31 | 0.225 |
| 1438861_at   | basonuclin 2                                   | Bnc2          | -1.43 | 0.148 | -8.88 | 0.007 | -2.42 | 0.029 | -3.5  | 0.001 | -4.02 | 0.002 |

**Supplementary table 3. List of significant expression profiles of XPA cells irradiated with 0.6J/m<sup>2</sup> of UV (gray color) as compared to non-irradiated XPA cotrols**

| code         | Gene Title                                                   | Symbol                | WT_0.6J/m <sup>2</sup> | p     | WT_4J/m <sup>2</sup> | p     | XPA_0.6J/m <sup>2</sup> | p     | CSB_0.6J/m <sup>2</sup> | p     | DKO_0.6J/m <sup>2</sup> | p     |
|--------------|--------------------------------------------------------------|-----------------------|------------------------|-------|----------------------|-------|-------------------------|-------|-------------------------|-------|-------------------------|-------|
| 1447605_at   | Zinc finger protein 457                                      | Zfp457                | -1.58                  | 0.258 | -3.68                | 0.039 | -4.24                   | 0.000 | 1.92                    | 0.242 | -1.21                   | 0.525 |
| 1454097_at   | zinc finger, CW type with PWWP domain 2                      | Zcwpw2                | -1.08                  | 0.546 | -1.49                | 0.193 | -4.05                   | 0.040 | -1.19                   | 0.023 | 1.43                    | 0.744 |
| 1450710_at   | jumonji, AT rich interactive domain 2                        | Jarid2                | 2.48                   | 0.625 | -1.53                | 0.127 | -3.92                   | 0.029 | -1.76                   | 0.095 | -1.63                   | 0.155 |
| 1456224_x_at | cancer antigen 1                                             | Cage1                 | 1.89                   | 0.167 | 1.71                 | 0.197 | -3.85                   | 0.004 | 1.48                    | 0.943 | 3.65                    | 0.463 |
| 1446718_at   | nuclear factor enhancer in B-cells inhibitor, beta           | Nfkbib                | 1.09                   | 0.870 | 1.03                 | 0.728 | -3.76                   | 0.045 | 1.38                    | 0.597 | 1.76                    | 0.692 |
| 1445572_at   | forkhead box Q1                                              | Foxq1                 | 1.01                   | 0.368 | -1.09                | 0.307 | -3.51                   | 0.043 | 2.18                    | 0.612 | -1.54                   | 0.128 |
| 1454691_at   | neurexin I                                                   | Nrxn1                 | -1.51                  | 0.186 | 1.71                 | 0.688 | -3.49                   | 0.004 | -1.04                   | 0.566 | -1.38                   | 0.184 |
| 1459759_s_at | RIKEN cDNA 1700065117 gene                                   | 1700065117Rik         | 1.6                    | 0.022 | 1.25                 | 0.750 | -3.43                   | 0.015 | -1.16                   | 0.387 | -1.84                   | 0.157 |
| 1458037_at   | Neurocalcin delta                                            | Ncald                 | -1.35                  | 0.302 | -1.59                | 0.070 | -3.4                    | 0.004 | 2.81                    | 0.194 | 1.49                    | 0.275 |
| 1429654_at   | developmental pluripotency associated 2                      | Dppa2                 | 1.85                   | 0.518 | 2.56                 | 0.359 | -3.39                   | 0.025 | 2.72                    | 0.186 | 1.81                    | 0.666 |
| 1433345_s_at | RIKEN cDNA 4930448K20 gene                                   | 4930448K20Rik         | 2.14                   | 0.154 | 1.1                  | 0.600 | -3.26                   | 0.024 | -1.17                   | 0.713 | 2.13                    | 0.621 |
| 1443629_at   | neuron navigator 1                                           | Nav1                  | 1.89                   | 0.849 | 1.53                 | 0.900 | -3.25                   | 0.022 | -1.2                    | 0.516 | -2.02                   | 0.104 |
| 1459230_at   | RIKEN cDNA B430319G15 gene                                   | D530025C14Rik         | 1.44                   | 0.693 | -1                   | 0.590 | -3.17                   | 0.002 | 1.35                    | 0.407 | -1.31                   | 0.302 |
| 1427645_a_at | interleukin 1 receptor accessory protein-like 2              | Il1rapl2              | 1.33                   | 0.781 | 2.95                 | 0.372 | -3.16                   | 0.008 | -1.5                    | 0.229 | 2.77                    | 0.399 |
| 1430249_at   | RIKEN cDNA 4930473A02 gene                                   | 4930473A02Rik         | -1.13                  | 0.382 | -1.06                | 0.556 | -3.06                   | 0.002 | -1.47                   | 0.229 | -1.19                   | 0.311 |
| 1426066_a_at | dystrobrevin alpha                                           | Dtna                  | 1.57                   | 0.533 | 1.02                 | 0.500 | -3.04                   | 0.003 | -1.07                   | 0.443 | -1.41                   | 0.282 |
| 1440148_at   | G protein-coupled receptor 6                                 | Gpr6                  | -1.21                  | 0.380 | -1.17                | 0.396 | -3.04                   | 0.019 | 1.81                    | 0.200 | -1.15                   | 0.418 |
| 1430105_at   | RIKEN cDNA 1700042O10 gene                                   | 1700042O10Rik         | 1.21                   | 0.274 | 1.26                 | 0.910 | -3                      | 0.002 | -1.04                   | 0.659 | 1.37                    | 0.311 |
| 1443120_at   | PDZ domain containing 4                                      | Pdzd4                 | 1.55                   | 0.902 | 1.15                 | 0.703 | -3                      | 0.002 | 2.32                    | 0.652 | -1.38                   | 0.140 |
| 1438294_at   | ataxin 1                                                     | Atxn1                 | 1                      | 0.863 | -5.21                | 0.001 | -2.99                   | 0.004 | -3.03                   | 0.001 | -3.85                   | 0.010 |
| 1441826_x_at | Ubiquitin domain containing 1                                | Ubtd1                 | 1.57                   | 0.649 | 1.11                 | 0.392 | -2.96                   | 0.010 | 2.47                    | 0.008 | 1.94                    | 0.261 |
| 1441215_at   | TraB domain containing                                       | Trabd                 | 1.29                   | 0.712 | 1.2                  | 0.783 | -2.93                   | 0.009 | 1.94                    | 0.043 | 1.42                    | 0.855 |
| 1457224_at   | RIKEN cDNA 4631422O05 gene                                   | 4631422O05Rik         | 1.08                   | 0.679 | 1.44                 | 0.711 | -2.92                   | 0.012 | 1.51                    | 0.875 | 2.65                    | 0.514 |
| 1458177_at   | emopamil binding protein-like                                | Ebpl                  | -2.14                  | 0.057 | -2.25                | 0.019 | -2.9                    | 0.009 | 1.43                    | 0.784 | -1.09                   | 0.660 |
| 1427444_at   | ATP-binding cassette, sub-family F (GCN20), member 1         | Abcf1                 | -1.12                  | 0.504 | 1.81                 | 0.939 | -2.87                   | 0.045 | 1.58                    | 0.896 | 1.3                     | 0.974 |
| 1436889_at   | GABA-A receptor, subunit alpha 1                             | Gabra1                | -1.75                  | 0.191 | -2.22                | 0.037 | -2.87                   | 0.048 | -1.87                   | 0.133 | -1.38                   | 0.208 |
| 1445318_at   | Kelch-like 4 (Drosophila)                                    | Klhl4                 | 1.35                   | 0.945 | -1.15                | 0.358 | -2.84                   | 0.043 | 2.32                    | 0.034 | -1.52                   | 0.186 |
| 1436602_x_at | calcium channel, voltage-dependent, N type, alpha 1B subunit | Cacna1b               | 1.82                   | 0.732 | -1.03                | 0.792 | -2.82                   | 0.048 | -1.68                   | 0.033 | 1.21                    | 0.737 |
| 1423968_at   | UDP glycosyltransferases 3 family, polypeptide A2            | Ugt3a2                | -1.32                  | 0.501 | -1.38                | 0.347 | -2.82                   | 0.033 | 1.41                    | 0.913 | 1.06                    | 0.860 |
| 1426876_at   | RIKEN cDNA 4732466D17 gene                                   | 4732466D17Rik         | 2.16                   | 0.174 | 1.46                 | 0.147 | -2.8                    | 0.021 | 2.35                    | 0.785 | 1.46                    | 0.358 |
| 1450809_at   | seminal vesicle antigen-like 2                               | Sval2                 | 2.22                   | 0.783 | 1.83                 | 0.835 | -2.8                    | 0.028 | 2.6                     | 0.382 | 2.04                    | 0.435 |
| 1431544_at   | RIKEN cDNA 4930524B17 gene                                   | 4930524B17Rik         | -3.59                  | 0.004 | -1.41                | 0.128 | -2.78                   | 0.047 | 1.33                    | 0.410 | 2.67                    | 0.231 |
| 1446686_at   | Dnaj (Hsp40) homolog, subfamily C, member 11                 | Dnajc11               | -1.81                  | 0.153 | 1.13                 | 0.809 | -2.78                   | 0.021 | -1.81                   | 0.104 | 1.22                    | 0.503 |
| 1421509_at   | VPS10 domain receptor protein SORCS 1                        | Sorcs1                | 1.17                   | 0.762 | -1.5                 | 0.226 | -2.71                   | 0.018 | 1.2                     | 0.794 | 1.03                    | 0.645 |
| 1420221_at   | RIKEN cDNA 4930461P20 gene                                   | 4930461P20Rik         | 1.04                   | 0.468 | 3.42                 | 0.672 | -2.69                   | 0.030 | 1.31                    | 0.701 | 1.18                    | 0.623 |
| 1443183_at   | HECT, UBA and WWE domain containing 1                        | Huwe1                 | 2.61                   | 0.155 | 1.18                 | 0.492 | -2.69                   | 0.005 | -1.44                   | 0.141 | 1.64                    | 0.546 |
| 1453835_at   | RIKEN cDNA 4930505M18 gene                                   | 4930505M18Rik         | -1.42                  | 0.244 | -1.32                | 0.299 | -2.68                   | 0.016 | 1.17                    | 0.678 | 2.48                    | 0.295 |
| 1441346_at   | RIKEN cDNA 2810421E14 gene                                   | 2810421E14Rik         | 2.21                   | 0.021 | 2.52                 | 0.326 | -2.66                   | 0.026 | 2.34                    | 0.039 | 1.12                    | 0.632 |
| 1442019_at   | RIKEN cDNA B230343A10 gene                                   | B230343A10Rik         | 2.28                   | 0.025 | 1.28                 | 0.290 | -2.66                   | 0.046 | -1.1                    | 0.739 | -1.96                   | 0.038 |
| 1422913_at   | protamine 3                                                  | Prm3                  | -1.01                  | 0.903 | 1.53                 | 0.040 | -2.66                   | 0.018 | 1.68                    | 0.333 | -1.15                   | 0.230 |
| 1427564_at   | diaphanous homolog 2 (Drosophila)                            | Diap2                 | -1.62                  | 0.060 | -4.29                | 0.032 | -2.65                   | 0.025 | -1.57                   | 0.072 | -3.92                   | 0.023 |
| 1446409_at   | glycosyltransferase-like domain containing 1                 | Gtdc1                 | -1.16                  | 0.632 | 1.03                 | 0.861 | -2.64                   | 0.014 | 1.02                    | 0.973 | 1.57                    | 0.931 |
| 1458620_at   | ubiquitin A-52 residue ribosomal protein fusion product 1    | LOC332993             | 1.09                   | 0.816 | -1.37                | 0.405 | -2.64                   | 0.047 | 2.61                    | 0.109 | 1.23                    | 0.747 |
| 1427596_at   | X (inactive)-specific transcript, antisense                  | Tsix                  | -1.34                  | 0.049 | 1.48                 | 0.760 | -2.64                   | 0.009 | 1.34                    | 0.891 | 1.47                    | 0.175 |
| 1422174_at   | insulin promoter factor 1, homeodomain transcription factor  | Ip1f                  | -1.27                  | 0.394 | 1.13                 | 0.495 | -2.63                   | 0.033 | 1.11                    | 0.749 | 2.11                    | 0.351 |
| 1459328_at   | RIKEN cDNA 4930429A22 gene                                   | 4930429A22Rik         | 2.34                   | 0.170 | -1.2                 | 0.401 | -2.62                   | 0.036 | -1.14                   | 0.477 | -1.62                   | 0.197 |
| 1430914_at   | RIKEN cDNA 5330426L24 gene                                   | 5330426L24Rik         | -1.07                  | 0.657 | 1.43                 | 0.868 | -2.62                   | 0.032 | -1.24                   | 0.534 | 1.15                    | 0.965 |
| 1460097_at   | Glutamate receptor, ionotropic, AMPA4 (alpha 4)              | Gria4                 | 1.77                   | 0.484 | 1.31                 | 0.280 | -2.62                   | 0.043 | 1.42                    | 0.673 | 1.15                    | 0.801 |
| 1429343_at   | RIKEN cDNA 1700012H05 gene                                   | 1700012H05Rik         | 1.51                   | 0.587 | 1.33                 | 0.441 | -2.6                    | 0.023 | 1.96                    | 0.614 | 1.27                    | 0.947 |
| 1427455_x_at | immunoglobulin kappa chain variable 8 (V8)-16                | Igk-C /// Igk-V28 /// | -1.61                  | 0.071 | 1.13                 | 0.777 | -2.6                    | 0.001 | 1.45                    | 0.710 | -1.2                    | 0.471 |
| 1445984_at   | PFTAIRE protein kinase 1                                     | Pftk1                 | 1.7                    | 0.228 | 2.44                 | 0.540 | -2.56                   | 0.029 | -1.86                   | 0.033 | 2.49                    | 0.956 |
| 1457699_at   | RIKEN cDNA E330009J07 gene                                   | E330009J07Rik         | 2.85                   | 0.303 | 1.94                 | 0.443 | -2.55                   | 0.037 | 1.23                    | 0.378 | 2.21                    | 0.632 |
| 1439847_s_at | Kruppel-like factor 12                                       | Klf12                 | 2.49                   | 0.136 | 2.76                 | 0.668 | -2.55                   | 0.015 | -1.1                    | 0.379 | 2.42                    | 0.964 |

|              |                                                                       |               |       |       |       |       |       |       |       |       |       |       |
|--------------|-----------------------------------------------------------------------|---------------|-------|-------|-------|-------|-------|-------|-------|-------|-------|-------|
| 1421238_a_at | protein tyrosine phosphatase, receptor type, T                        | Ptprt         | 1.9   | 0.520 | 1.36  | 0.913 | -2.52 | 0.002 | 1.11  | 0.529 | 1.61  | 0.249 |
| 1458777_at   | solute carrier family 18 (vesicular monoamine), member 1              | Slc18a1       | -1.84 | 0.122 | -1.6  | 0.110 | -2.52 | 0.043 | 1.08  | 0.654 | 1.62  | 0.362 |
| 1450305_at   | RIKEN cDNA 4930591A17 gene                                            | 4930591A17Rik | -1.27 | 0.330 | -1.24 | 0.219 | -2.5  | 0.001 | 1.58  | 0.302 | 1.65  | 0.989 |
| 1444505_at   | retinoic acid induced 17                                              | Rai17         | 1.74  | 0.739 | 1.51  | 0.872 | -2.5  | 0.040 | 1.42  | 0.886 | 1.17  | 0.866 |
| 1432750_at   | RIKEN cDNA 2810409C01 gene                                            | 2810409C01Rik | 2.71  | 0.697 | 1.39  | 0.121 | -2.47 | 0.021 | 1.22  | 0.714 | -1.44 | 0.313 |
| 1432412_at   | RIKEN cDNA 9530004P13 gene                                            | 9530004P13Rik | -1.43 | 0.230 | 1.74  | 0.642 | -2.47 | 0.025 | 1.96  | 0.966 | 2.77  | 0.439 |
| 1429693_at   | disabled homolog 2 (Drosophila)                                       | Dab2          | 1.94  | 0.280 | 3.16  | 0.295 | -2.47 | 0.019 | -1.25 | 0.315 | 1.25  | 0.689 |
| 1450823_at   | OG9 homeobox gene                                                     | Og9x          | -1.43 | 0.459 | 1.07  | 0.596 | -2.45 | 0.000 | 1.71  | 0.919 | -2.07 | 0.022 |
| 1430840_at   | RIKEN cDNA 4930449C09 gene                                            | 4930449C09Rik | -1.07 | 0.271 | -1.14 | 0.244 | -2.43 | 0.023 | 2.25  | 0.330 | 1.09  | 0.216 |
| 1438861_at   | basonuclin 2                                                          | Bnc2          | -1.43 | 0.148 | -8.88 | 0.007 | -2.42 | 0.029 | -3.5  | 0.001 | -4.02 | 0.002 |
| 1432060_at   | IQ motif containing with AAA domain                                   | lqca          | 1.14  | 0.325 | -1.38 | 0.392 | -2.42 | 0.031 | 1.16  | 0.894 | 1.96  | 0.604 |
| 1420445_at   | solute carrier family 16_8                                            | Slc16a8       | 2.14  | 0.981 | 1.03  | 0.448 | -2.41 | 0.018 | -1.24 | 0.347 | -2.02 | 0.136 |
| 1440410_at   | RIKEN cDNA A930011G23 gene                                            | A930011G23Rik | 2.39  | 0.207 | 2.59  | 0.159 | -2.4  | 0.036 | 2.21  | 0.364 | 1.42  | 0.321 |
| 1422361_at   | T lymphoma oncogene                                                   | Tim           | 1.33  | 0.147 | 1.26  | 0.419 | -2.39 | 0.018 | 1.1   | 0.924 | 1.64  | 0.790 |
| 1454325_at   | RIKEN cDNA 4930487N04 gene                                            | 4930487N04Rik | -1.7  | 0.137 | -1.43 | 0.056 | -2.38 | 0.035 | 1.39  | 0.743 | 2.79  | 0.123 |
| 1433275_at   | RIKEN cDNA 4933401B01 gene                                            | 4933401B01Rik | 1.92  | 0.338 | 2.19  | 0.680 | -2.38 | 0.038 | 1.41  | 0.888 | 1.54  | 0.764 |
| 1456560_at   | gene model 93, (NCBI)                                                 | Gm93          | 1.83  | 0.516 | 2.07  | 0.474 | -2.38 | 0.035 | -2.01 | 0.032 | 3.14  | 0.379 |
| 1458396_at   | purinergic receptor P2X, ligand-gated ion channel, 3                  | P2rx3         | 1.33  | 0.590 | 1.2   | 0.568 | -2.38 | 0.006 | 1.27  | 0.548 | 1.33  | 0.481 |
| 1417730_at   | exostoses (multiple) 1                                                | Ext1          | 1.33  | 0.686 | -1.75 | 0.098 | -2.36 | 0.002 | -2.41 | 0.001 | -2.41 | 0.013 |
| 1453959_at   | RIKEN cDNA 1700065O13 gene                                            | 1700065O13Rik | -1.79 | 0.194 | 1.45  | 0.897 | -2.35 | 0.047 | 2.68  | 0.462 | 1.2   | 0.530 |
| 1427793_at   | hypothetical protein, P4(21)n gene                                    | AJ242955      | 1.73  | 0.716 | 1.05  | 0.679 | -2.35 | 0.049 | -1.27 | 0.349 | -1.08 | 0.249 |
| 1425168_at   | G protein, gamma transducing activity polypeptide 1                   | Gngt1         | 1.8   | 0.666 | -1.08 | 0.647 | -2.34 | 0.026 | 2.73  | 0.608 | 1.35  | 0.815 |
| 1459705_at   | Olfactomedin 3                                                        | Olfm3         | 1.34  | 0.658 | 1.08  | 0.674 | -2.34 | 0.030 | 1.46  | 0.812 | 1.21  | 0.915 |
| 1454000_s_at | RIKEN cDNA 4930578N16 gene                                            | 4930578N16Rik | 1.94  | 0.803 | 1.01  | 0.474 | -2.33 | 0.042 | 1.54  | 0.822 | 1.24  | 0.505 |
| 1446258_at   | Syntrophin, basic 1                                                   | Sntb1         | 1.37  | 0.770 | 1.92  | 0.694 | -2.32 | 0.020 | 1.63  | 0.272 | 1.22  | 0.290 |
| 1432762_at   | RIKEN cDNA 9530025H10 gene                                            | 9530025H10Rik | -1.15 | 0.494 | -1.84 | 0.132 | -2.31 | 0.024 | -1.12 | 0.666 | 2.31  | 0.719 |
| 1422384_at   | olfactory receptor 1509                                               | Olf1509       | 1.81  | 0.294 | 1.83  | 0.578 | -2.31 | 0.042 | 1.14  | 0.971 | 1.08  | 0.755 |
| 1438541_at   | RIKEN cDNA 4933439F18 gene                                            | 4933439F18Rik | 1.95  | 0.248 | 2.67  | 0.230 | -2.3  | 0.008 | 1.74  | 0.049 | 3.69  | 0.227 |
| 1441820_at   | cyclin-dependent kinase-like 2 (CDC2-related kinase)                  | Cdkl2         | 2.63  | 0.326 | 1.23  | 0.159 | -2.3  | 0.042 | 2.01  | 0.376 | 1.53  | 0.183 |
| 1440675_at   | Glucocorticoid receptor DNA binding factor 1                          | Grif1         | 1.14  | 0.035 | 1.18  | 0.378 | -2.3  | 0.008 | -1.28 | 0.342 | -1.11 | 0.699 |
| 1430486_at   | RAD51-like 1 (S. cerevisiae)                                          | Rad51l1       | 2.58  | 0.694 | 2.67  | 0.963 | -2.3  | 0.027 | 1.19  | 0.928 | 1.48  | 0.052 |
| 1436938_at   | RNA binding motif, single stranded interacting protein                | Rbms3         | -1.51 | 0.261 | -4.05 | 0.115 | -2.3  | 0.013 | -1.97 | 0.023 | -2.67 | 0.026 |
| 1456423_at   | methyl-CpG binding domain protein 5                                   | Mbd5          | -1.34 | 0.162 | -6.08 | 0.005 | -2.29 | 0.026 | -2.69 | 0.001 | -2.88 | 0.005 |
| 1457376_at   | Integrin alpha 4                                                      | Itga4         | 2.92  | 0.140 | 1.32  | 0.609 | -2.28 | 0.043 | 1.51  | 0.131 | 1.9   | 0.126 |
| 1454906_at   | retinoic acid receptor, beta                                          | Rarb          | 1.75  | 0.392 | 1.15  | 0.433 | -2.27 | 0.030 | 1.15  | 0.569 | -1.1  | 0.565 |
| 1460015_at   | spermatogenesis and oogenesis specific basic helix-loop-helix 1       | Sohlh1        | -1.62 | 0.104 | 1.4   | 0.595 | -2.27 | 0.024 | 1.98  | 0.206 | 1.09  | 0.724 |
| 1433274_at   | RIKEN cDNA 2610200G18 gene                                            | 2610200G18Rik | 1.18  | 0.572 | 1     | 0.952 | -2.26 | 0.042 | 1.23  | 0.569 | 1.12  | 0.783 |
| 1423278_at   | protein tyrosine phosphatase, receptor type, K                        | Ptpk          | -1.49 | 0.031 | -2.67 | 0.015 | -2.26 | 0.030 | -2.01 | 0.007 | -2.16 | 0.014 |
| 1430209_at   | RIKEN cDNA 4930404H21 gene                                            | 4930404H21Rik | 1.91  | 0.663 | 1.05  | 0.801 | -2.25 | 0.024 | -1.22 | 0.200 | 2.42  | 0.020 |
| 1442912_at   | hydroxy-delta-5-steroid dehydrogenase, 3 beta- and steroid delta-isc  | Hsd3b7        | 2.21  | 0.222 | 2.34  | 0.528 | -2.24 | 0.017 | 2.26  | 0.886 | -1.28 | 0.268 |
| 1444546_at   | cDNA sequence BC027057                                                | BC027057      | -1.64 | 0.036 | -1.1  | 0.709 | -2.23 | 0.036 | -1.03 | 0.717 | 1.63  | 0.149 |
| 1431587_at   | coiled-coil domain containing 7                                       | Ccdc7         | 1.07  | 0.641 | 1     | 0.588 | -2.23 | 0.005 | 1.19  | 0.575 | 1.32  | 0.109 |
| 1428987_at   | dynein light chain roadblock-type 2                                   | Dynlrb2       | 1.41  | 0.625 | 1.47  | 0.854 | -2.23 | 0.035 | -1.62 | 0.042 | -1.04 | 0.592 |
| 1454493_at   | RIKEN cDNA 5033425B01 gene                                            | 5033425B01Rik | -1.43 | 0.244 | 1.15  | 0.291 | -2.21 | 0.006 | 1.24  | 0.978 | -1.09 | 0.538 |
| 1447388_at   | RIKEN cDNA 5830484A20 gene                                            | 5830484A20Rik | 2.08  | 0.054 | 2.71  | 0.067 | -2.21 | 0.011 | 2.81  | 0.562 | 1.95  | 0.164 |
| 1427237_at   | RIKEN cDNA 2410015M20 gene                                            | 2410015M20Rik | -1.01 | 0.459 | 1.89  | 0.998 | -2.2  | 0.028 | 1.61  | 0.653 | 2.08  | 0.197 |
| 1443425_at   | A disintegrin-like and metallopeptidase (reprolysin type) with thromb | Adamts6       | 1.5   | 0.475 | 1.26  | 0.971 | -2.2  | 0.027 | -1.35 | 0.094 | -1.65 | 0.098 |
| 1457297_at   | LysM, putative peptidoglycan-binding, domain containing 4             | Lysmd4        | 1.75  | 0.370 | 1.26  | 0.795 | -2.2  | 0.015 | 1.15  | 0.758 | -1.34 | 0.096 |
| 1446788_at   | RIKEN cDNA A430091L06 gene                                            | A430091L06Rik | 1.61  | 0.268 | 1.25  | 0.986 | -2.19 | 0.030 | 1.1   | 0.939 | 1.05  | 0.708 |
| 1443983_at   | Sorbin and SH3 domain containing 1                                    | Sorbs1        | -1.14 | 0.407 | -1.44 | 0.380 | -2.19 | 0.014 | -2.22 | 0.050 | -2.67 | 0.065 |
| 1453510_s_at | RIKEN cDNA 4930589M24 gene                                            | 4930589M24Rik | 2.15  | 0.507 | 1.03  | 0.878 | -2.18 | 0.041 | 2.41  | 0.492 | -1.13 | 0.529 |
| 1452762_at   | RIKEN cDNA 8430436O14 gene                                            | 8430436O14Rik | -1.6  | 0.141 | -3.44 | 0.061 | -2.18 | 0.007 | -1.79 | 0.002 | -2.17 | 0.036 |
| 1437393_at   | expressed sequence A1875142                                           | A1875142      | -1.31 | 0.125 | -3.91 | 0.004 | -2.18 | 0.001 | -2.12 | 0.006 | -2.46 | 0.005 |
| 1425842_at   | EGF-like repeats and discoidin I-like domains 3                       | Edil3         | 1.64  | 0.505 | 1.2   | 0.201 | -2.18 | 0.020 | -1.04 | 0.689 | -1.07 | 0.475 |
| 1446104_at   | SLIT-ROBO Rho GTPase activating protein 3                             | Srgap3        | 1.05  | 0.730 | 2.09  | 0.967 | -2.18 | 0.049 | -1.22 | 0.355 | 1.01  | 0.893 |
| 1441681_at   | exportin, tRNA (nuclear export receptor for tRNAs)                    | Xpot          | 1.52  | 0.489 | 1.33  | 0.944 | -2.18 | 0.008 | 1.46  | 0.411 | -1.22 | 0.161 |
| 1431955_at   | RIKEN cDNA 4930453H23 gene                                            | 4930453H23Rik | 1.33  | 0.000 | 1.55  | 0.644 | -2.16 | 0.008 | -1.31 | 0.258 | 1.71  | 0.262 |
| 1453909_at   | RIKEN cDNA 4930505N22 gene                                            | 4930505N22Rik | 1.34  | 0.882 | 2.76  | 0.279 | -2.16 | 0.037 | 1.12  | 0.481 | -1.24 | 0.060 |

|              |                                                                         |                   |       |       |       |       |       |       |       |       |       |       |
|--------------|-------------------------------------------------------------------------|-------------------|-------|-------|-------|-------|-------|-------|-------|-------|-------|-------|
| 1450467_at   | bassoon                                                                 | Bsn               | 1.55  | 0.375 | 1.42  | 0.025 | -2.16 | 0.005 | 1.29  | 0.650 | 1.22  | 0.747 |
| 1427268_at   | filaggrin /// similar to Filaggrin /// similar to Filaggrin             | Flg /// LOC620355 | 1.17  | 0.341 | 1.39  | 0.866 | -2.16 | 0.031 | 1.38  | 0.624 | 2.91  | 0.089 |
| 1452783_at   | fibronectin type III domain containing 3B                               | Fndc3b            | 1.16  | 0.796 | -1.44 | 0.119 | -2.16 | 0.005 | -2.1  | 0.000 | -2.71 | 0.002 |
| 1417347_at   | PYD and CARD domain containing                                          | Pycard            | 1.89  | 0.790 | 1.64  | 0.611 | -2.16 | 0.017 | 1.08  | 0.738 | 1.97  | 0.624 |
| 1431029_at   | tubulin tyrosine ligase like family 9                                   | Ttl9              | -1.41 | 0.367 | -1.4  | 0.235 | -2.16 | 0.008 | 1.36  | 0.795 | 1.97  | 0.467 |
| 1438531_at   | RIKEN cDNA A730054J21 gene                                              | A730054J21Rik     | -1.34 | 0.080 | -3.96 | 0.006 | -2.15 | 0.001 | -2.14 | 0.003 | -2.72 | 0.004 |
| 1435981_at   | RIKEN cDNA E430014L09 gene                                              | E430014L09Rik     | -1.1  | 0.496 | -3.72 | 0.001 | -2.15 | 0.001 | -3.24 | 0.000 | -3.68 | 0.001 |
| 1451948_at   | gene model 1409, (NCBI)                                                 | Gm1409            | -1.07 | 0.834 | 1.62  | 0.277 | -2.15 | 0.038 | 1.12  | 0.734 | 1.6   | 0.748 |
| 1432625_at   | RIKEN cDNA 5830487K18 gene                                              | 5830487K18Rik     | -1.01 | 0.497 | 2.05  | 0.102 | -2.14 | 0.023 | 1.56  | 0.391 | 1.73  | 0.228 |
| 1440469_at   | hypothetical protein LOC629141                                          | LOC629141         | -1.05 | 0.288 | 1.99  | 0.838 | -2.14 | 0.005 | 1.68  | 0.467 | 1.47  | 0.907 |
| 1435059_at   | development and differentiation enhancing                               | Ddef1             | 1.19  | 0.970 | -1.45 | 0.158 | -2.13 | 0.001 | -2.06 | 0.003 | -2.64 | 0.001 |
| 1442483_at   | Fucosyltransferase 8                                                    | Fut8              | 1.81  | 0.995 | 1.1   | 0.443 | -2.13 | 0.001 | -1.05 | 0.379 | 1.35  | 0.571 |
| 1452342_at   | amyloid beta (A4) precursor protein-binding, family B, member 2         | Apbb2             | -1.24 | 0.242 | -4.81 | 0.045 | -2.12 | 0.007 | -2.59 | 0.000 | -2.8  | 0.010 |
| 1447132_at   | CDK5 regulatory subunit associated protein 1-like 1                     | Cdkal1            | 1.2   | 0.550 | 1.41  | 0.349 | -2.11 | 0.050 | 1.35  | 0.339 | -1.08 | 0.544 |
| 1445442_at   | microtubule-associated protein 9                                        | Mtap9             | 2.02  | 0.329 | 3.45  | 0.325 | -2.11 | 0.002 | 1.21  | 0.778 | 1.16  | 0.719 |
| 1440506_at   | Solute carrier family 7 (cationic amino acid transporter, y+ system), r | Slc7a2            | 1.01  | 0.712 | 2.75  | 0.360 | -2.11 | 0.022 | 1.39  | 0.713 | 1.91  | 0.954 |
| 1440695_at   | Zinc finger protein 40                                                  | Zfp40             | 1.56  | 0.764 | 1.96  | 0.549 | -2.11 | 0.048 | 1.76  | 0.548 | -1.48 | 0.222 |
| 1449314_at   | zinc finger protein, multitype 2                                        | Zfpm2             | -1.07 | 0.482 | -8.16 | 0.005 | -2.11 | 0.007 | -2.19 | 0.002 | -2.66 | 0.026 |
| 1432991_at   | RIKEN cDNA 4930519E07 gene                                              | 4930519E07Rik     | -1.22 | 0.567 | -1.11 | 0.384 | -2.1  | 0.010 | 1.42  | 0.828 | 1.69  | 0.918 |
| 1432927_at   | RIKEN cDNA 4921507K24 gene                                              | 4921507K24Rik     | -1.57 | 0.138 | 1.54  | 0.935 | -2.09 | 0.019 | 1.56  | 0.855 | 1.63  | 0.215 |
| 1426412_at   | neurogenic differentiation 1                                            | Neurod1           | 2.23  | 0.471 | 3.34  | 0.006 | -2.09 | 0.004 | 1.26  | 0.839 | -2.11 | 0.049 |
| 1450945_at   | protein kinase C, alpha                                                 | Prkca             | 1.16  | 0.926 | -2.39 | 0.042 | -2.09 | 0.001 | -2.13 | 0.001 | -2.58 | 0.005 |
| 1447570_s_at | A kinase (PRKA) anchor protein 10                                       | Akap10            | -1.48 | 0.321 | -1.7  | 0.355 | -2.08 | 0.047 | -1.17 | 0.367 | 1.56  | 0.914 |
| 1455416_at   | Riken cDNA C130021I20 gene                                              | C130021I20Rik     | 1.74  | 0.044 | 1.06  | 0.709 | -2.08 | 0.017 | 1.51  | 0.407 | 1.54  | 0.168 |
| 1434582_at   | DNA segment, Chr 14, ERATO Doi 171, expressed                           | D14Erttd171e      | -2.2  | 0.031 | -3.44 | 0.041 | -2.08 | 0.048 | -1.68 | 0.048 | -2.95 | 0.032 |
| 1419528_at   | sulfotransferase family 2A, dehydroepiandrosterone (DHEA)-preferri      | Sult2a2           | -1.25 | 0.165 | 1.71  | 0.273 | -2.08 | 0.043 | 1.58  | 0.993 | -1.91 | 0.099 |
| 1459399_at   | Solute carrier family 31, member 2                                      | Slc31a2           | -1.02 | 0.430 | -1.91 | 0.187 | -2.07 | 0.014 | -1    | 0.871 | 1.31  | 0.690 |
| 1441808_at   | RIKEN cDNA 2410002I01 gene                                              | 2410002I01Rik     | 1.05  | 0.767 | -1.06 | 0.549 | -2.06 | 0.031 | 2.31  | 0.454 | 1.68  | 0.983 |
| 1436406_at   | RIKEN cDNA A930007I19 gene                                              | A930007I19Rik     | 1.4   | 0.759 | 1.16  | 0.586 | -2.06 | 0.039 | 2.47  | 0.256 | 1.48  | 0.723 |
| 1424451_at   | acetyl-Coenzyme A acyltransferase 1B                                    | Acaa1b            | -1.33 | 0.332 | 1.33  | 0.038 | -2.06 | 0.024 | 1.07  | 0.807 | 1.92  | 0.641 |
| 1437667_a_at | BTB and CNC homology 2                                                  | Bach2             | -1.18 | 0.294 | -4.19 | 0.025 | -2.06 | 0.006 | -2.17 | 0.003 | -2.31 | 0.063 |
| 1436261_at   | Dysferlin                                                               | Dysf              | 1.19  | 0.972 | 1.12  | 0.732 | -2.06 | 0.018 | 1.05  | 0.949 | -1.08 | 0.646 |
| 1423713_at   | ATP-binding cassette, sub-family B (MDR/TAP), member 8                  | Abcb8             | 1.98  | 0.581 | 1.02  | 0.488 | -2.05 | 0.018 | 1.86  | 0.545 | 1.2   | 0.423 |
| 1434932_at   | adenosine deaminase, RNA-specific, B1                                   | Adarb1            | 1.56  | 0.599 | -3.87 | 0.025 | -2.05 | 0.044 | -1.38 | 0.002 | -1.34 | 0.323 |
| 1444317_at   | protocadherin 15                                                        | Pcdh15            | 1.79  | 0.736 | 1.55  | 0.752 | -2.05 | 0.040 | 2.49  | 0.391 | 1.1   | 0.893 |
| 1456718_at   | transmembrane protein 56                                                | Tmem56            | 2.03  | 0.460 | 1.98  | 0.246 | -2.05 | 0.043 | 1.4   | 0.929 | 1.27  | 0.393 |
| 1429987_at   | RIKEN cDNA 9930013L23 gene                                              | 9930013L23Rik     | -1.29 | 0.007 | -3.17 | 0.004 | -2.03 | 0.006 | -1.74 | 0.000 | -2.44 | 0.008 |
| 1430168_at   | CSA-conditional, T cell activation-dependent protein                    | Cstad             | 1.76  | 0.206 | 2.15  | 0.150 | -2.03 | 0.016 | 1.36  | 0.933 | 1.35  | 0.871 |
| 1445534_at   | Filamin, beta                                                           | Flnb              | -1.11 | 0.277 | -1.51 | 0.033 | -2.03 | 0.045 | -1.77 | 0.006 | -2.31 | 0.001 |
| 1447359_at   | zinc finger protein 575                                                 | Zfp575            | -1.21 | 0.341 | 1.66  | 0.775 | -2.02 | 0.040 | 1.68  | 0.356 | 1.15  | 0.743 |
| 1425335_at   | CD8 antigen, alpha chain /// similar to T-cell surface glycoprotein CD  | Cd8a /// LOC63614 | -1.08 | 0.448 | 1.63  | 0.737 | -2.01 | 0.042 | 1.27  | 0.605 | 2.81  | 0.248 |
| 1431891_at   | zinc finger, SWIM domain containing 5                                   | Zswim5            | -1.04 | 0.630 | 1.03  | 0.911 | -2.01 | 0.000 | 1.29  | 0.661 | 2.27  | 0.043 |
| 1458036_at   | Expressed sequence C77576                                               | C77576            | 1.37  | 0.517 | 1.6   | 0.940 | -2    | 0.031 | 1.61  | 0.137 | 1.3   | 0.926 |
| 1450263_at   | protocadherin beta 5                                                    | Pcdhb5            | 2.3   | 0.491 | 1.56  | 0.390 | -2    | 0.013 | 1.17  | 0.809 | -1.23 | 0.405 |
| 1445133_at   | Transcription factor 12                                                 | Tcf12             | 1.55  | 0.912 | 3.67  | 0.767 | -2    | 0.049 | 1.29  | 0.795 | 1.47  | 0.637 |
| 1433195_at   | RIKEN cDNA 9530006O14 gene                                              | 9530006O14Rik     | 1.2   | 0.871 | 1.08  | 0.370 | -1.99 | 0.035 | -1.13 | 0.336 | 1.12  | 0.970 |
| 1426951_at   | cysteine rich transmembrane BMP regulator 1 (chordin like)              | Crim1             | -1.11 | 0.025 | -2.12 | 0.000 | -1.99 | 0.027 | -1.7  | 0.004 | -1.64 | 0.011 |
| 1417318_at   | deleted in bladder cancer 1 (human)                                     | Dbc1              | -1.37 | 0.141 | -3.6  | 0.020 | -1.99 | 0.004 | -1.84 | 0.008 | -2.43 | 0.006 |
| 1423639_at   | histamine receptor H 2                                                  | Hrh2              | -2.43 | 0.026 | -1.16 | 0.857 | -1.99 | 0.047 | -1.52 | 0.088 | 4.28  | 0.257 |
| 1447858_x_at | interleukin 4 receptor, alpha                                           | Il4ra             | -1.04 | 0.394 | -1.17 | 0.390 | -1.99 | 0.027 | 1.08  | 0.748 | 1.59  | 0.620 |
| 1446589_at   | Rhomboid domain containing 1                                            | Rhbdd1            | 1.42  | 0.916 | -1.49 | 0.362 | -1.99 | 0.027 | 2     | 0.132 | 1.42  | 0.943 |
| 1425928_at   | X Kell blood group precursor related family member 6 homolog            | Xkr6              | 1.42  | 0.656 | 2.26  | 0.155 | -1.99 | 0.033 | 1.75  | 0.593 | 2.29  | 0.064 |
| 1444341_at   | RIKEN cDNA 8030451F13 gene                                              | 8030451F13Rik     | 1.26  | 0.983 | 3.69  | 0.022 | -1.98 | 0.033 | 1.22  | 0.611 | 1.22  | 0.990 |
| 1422050_at   | NK1 transcription factor related, locus 2 (Drosophila)                  | Nkx1-2            | 1.67  | 0.132 | 2.05  | 0.220 | -1.98 | 0.029 | 1.24  | 0.674 | 2.25  | 0.641 |
| 1446587_at   | RIKEN cDNA 2310042E16 gene                                              | 2310042E16Rik     | -1.54 | 0.276 | -1.28 | 0.363 | -1.97 | 0.013 | 1.81  | 0.578 | 1.02  | 0.957 |
| 1430517_at   | RIKEN cDNA 4930544O15 gene                                              | 4930544O15Rik     | 1.01  | 0.908 | 1.84  | 0.261 | -1.97 | 0.020 | 1.26  | 0.556 | 2.02  | 0.003 |
| 1425339_at   | phospholipase C, beta 4                                                 | Plcb4             | 1.5   | 0.370 | 1.22  | 0.486 | -1.97 | 0.000 | -1.37 | 0.003 | -1.54 | 0.178 |
| 1447545_at   | DNA segment, Chr 7, ERATO Doi 193, expressed                            | D7Erttd193e       | -1.27 | 0.268 | 1.5   | 0.264 | -1.96 | 0.028 | 2.08  | 0.211 | 2.11  | 0.601 |

|              |                                                                          |                    |       |       |       |       |       |       |       |       |       |       |
|--------------|--------------------------------------------------------------------------|--------------------|-------|-------|-------|-------|-------|-------|-------|-------|-------|-------|
| 1427387_a_at | integrin beta 4                                                          | Itgb4              | 1.14  | 0.469 | -1.37 | 0.254 | -1.96 | 0.019 | 1.12  | 0.707 | 1     | 0.529 |
| 1444310_at   | polymerase (RNA) III (DNA directed) polypeptide A                        | Polr3a             | -1.14 | 0.502 | -1.16 | 0.626 | -1.96 | 0.048 | 2.45  | 0.294 | 1.39  | 0.913 |
| 1426391_at   | ADP-ribosylation factor 1 /// similar to ADP-ribosylation factor 1       | Arf1 /// LOC545267 | 1.26  | 0.677 | 2.18  | 0.188 | -1.95 | 0.010 | 1.12  | 0.536 | 3.03  | 0.145 |
| 1424625_a_at | DENN/MADD domain containing 1A                                           | Dennd1a            | -1.06 | 0.474 | -2.94 | 0.002 | -1.95 | 0.016 | -2.58 | 0.012 | -2.85 | 0.032 |
| 1430495_at   | inositol (myo)-1(or 4)-monophosphatase 1                                 | Impa1              | 1.62  | 0.479 | -1.17 | 0.346 | -1.95 | 0.038 | 1.25  | 0.341 | 1.58  | 0.959 |
| 1425640_at   | AF4/FMR2 family, member 1                                                | Aff1               | 1.4   | 0.353 | 1.09  | 0.857 | -1.94 | 0.038 | -1.25 | 0.037 | -1.41 | 0.109 |
| 1440990_at   | cDNA sequence BC056349                                                   | BC056349           | -1.84 | 0.199 | -4.12 | 0.094 | -1.94 | 0.002 | -2.52 | 0.009 | -2.07 | 0.013 |
| 1446428_at   | RIKEN cDNA D530005L17 gene                                               | D530005L17Rik      | 1.64  | 0.145 | -2.34 | 0.108 | -1.94 | 0.012 | -1.83 | 0.215 | 1.6   | 0.478 |
| 1458327_x_at | solute carrier family 26 (sulfate transporter), member 1                 | Slc26a1            | 2.06  | 0.404 | 2.26  | 0.686 | -1.94 | 0.028 | -1.49 | 0.335 | -1.43 | 0.376 |
| 1452222_at   | utrophin                                                                 | Utrn               | -1.22 | 0.149 | -2.52 | 0.017 | -1.94 | 0.006 | -1.74 | 0.003 | -2.28 | 0.007 |
| 1431635_at   | RIKEN cDNA 4930412F09 gene                                               | 4930412F09Rik      | 1.47  | 0.719 | -1.01 | 0.828 | -1.93 | 0.019 | 1.52  | 0.412 | -1.01 | 0.813 |
| 1431110_at   | RIKEN cDNA 5430431D22 gene                                               | 5430431D22Rik      | -1.28 | 0.197 | -4.34 | 0.012 | -1.93 | 0.004 | -1.85 | 0.023 | -1.89 | 0.015 |
| 1449825_at   | actin-related protein T1                                                 | Actrt1             | 2.03  | 0.315 | 2.18  | 0.761 | -1.93 | 0.034 | 1.41  | 0.258 | 1.35  | 0.949 |
| 1422012_at   | corticotropin releasing hormone receptor 2                               | Crh2               | -1.17 | 0.295 | 1.05  | 0.848 | -1.93 | 0.007 | -1.07 | 0.751 | 1.17  | 0.575 |
| 1460508_at   | mitochondrial ribosomal protein L1                                       | Mpl1               | -1.29 | 0.282 | -3.3  | 0.011 | -1.93 | 0.035 | 1.91  | 0.083 | -1.76 | 0.122 |
| 1422760_at   | peptidyl arginine deiminase, type IV /// similar to Protein-arginine dei | Pad4 /// LOC67054  | 2.3   | 0.486 | 3.53  | 0.085 | -1.93 | 0.018 | 1.44  | 0.255 | -1.3  | 0.335 |
| 1423269_a_at | neural precursor cell expressed, developmentally down-regulated ge       | Nedd4l             | 1.26  | 0.879 | -2.06 | 0.051 | -1.92 | 0.005 | -2.03 | 0.000 | -2.21 | 0.003 |
| 1435432_at   | centaurin, gamma 2                                                       | Centg2             | -1.23 | 0.014 | -2.53 | 0.001 | -1.91 | 0.009 | -1.57 | 0.005 | -1.97 | 0.018 |
| 1437880_at   | ladybird homeobox 1 homolog (Drosophila) corepressor 1                   | Lbxcor1            | 1.89  | 0.859 | 1.29  | 0.650 | -1.91 | 0.009 | -1.33 | 0.278 | 3.61  | 0.020 |
| 1450669_at   | mitogen activated protein kinase kinase kinase 11                        | Map3k11            | 1.65  | 0.180 | 1.21  | 0.309 | -1.91 | 0.041 | 1.17  | 0.197 | 1.5   | 0.513 |
| 1436005_at   | splicing factor, arginine/serine-rich 14                                 | Sfrs14             | 1.09  | 0.739 | 1.14  | 0.736 | -1.91 | 0.026 | 1.02  | 0.443 | 1.16  | 0.879 |
| 1438975_x_at | zinc finger, DHHC domain containing 14                                   | Zdhhc14            | -1.61 | 0.294 | -5.72 | 0.178 | -1.91 | 0.032 | -2.53 | 0.001 | -2.16 | 0.055 |
| 1446506_at   | hypothetical protein B930041G04                                          | B930041G04         | 1.35  | 0.810 | -1.4  | 0.256 | -1.9  | 0.007 | 1.9   | 0.933 | -1.01 | 0.958 |
| 1443269_at   | RIKEN cDNA D130009B15 gene                                               | D130009B15Rik      | 2     | 0.636 | 1.36  | 0.899 | -1.9  | 0.011 | -1.16 | 0.766 | 1.43  | 0.750 |
| 1440071_at   | membrane associated guanylate kinase, WW and PDZ domain cont:            | Magi1              | 1.57  | 0.292 | -1.34 | 0.336 | -1.9  | 0.046 | -1.2  | 0.607 | 1.65  | 0.776 |
| 1421413_a_at | PDZ and LIM domain 5 /// similar to PDZ and LIM domain protein 5 (       | Pdlim5 /// LOC669E | 12.26 | 0.588 | 7     | 0.464 | -1.9  | 0.034 | -1.56 | 0.045 | -1.95 | 0.040 |
| 1422541_at   | protein tyrosine phosphatase, receptor type, M                           | Ptprm              | -1.47 | 0.055 | -3.24 | 0.022 | -1.9  | 0.005 | -1.86 | 0.004 | -2.27 | 0.004 |
| 1449876_at   | protein kinase, cGMP-dependent, type I                                   | Prkg1              | -1.69 | 0.071 | -2.63 | 0.025 | -1.89 | 0.006 | -1.42 | 0.085 | -1.45 | 0.112 |
| 1454385_at   | RIKEN cDNA 1700018P08 gene                                               | 1700018P08Rik      | 1.51  | 0.930 | 1.65  | 0.778 | -1.88 | 0.043 | 2.49  | 0.349 | -1.24 | 0.387 |
| 1455522_at   | Rho guanine nucleotide exchange factor (GEF) 15                          | Arhgef15           | 1.15  | 0.688 | -1.32 | 0.330 | -1.88 | 0.026 | 2.3   | 0.290 | 1.66  | 0.658 |
| 1419563_at   | baculoviral IAP repeat-containing 6                                      | Birc6              | -1.1  | 0.444 | 1.02  | 0.519 | -1.88 | 0.025 | -1.08 | 0.507 | 1.55  | 0.407 |
| 1437886_at   | kelch-like 6 (Drosophila)                                                | Klhl6              | 3.34  | 0.304 | 3.1   | 0.214 | -1.88 | 0.047 | -1.03 | 0.636 | 1.81  | 0.897 |
| 1453448_at   | RIKEN cDNA 2310067E19 gene                                               | 2310067E19Rik      | 2.05  | 0.314 | -1.48 | 0.221 | -1.87 | 0.038 | -1.21 | 0.196 | 1.4   | 0.844 |
| 1430977_at   | RIKEN cDNA A930021C24 gene                                               | A930021C24Rik      | 1.47  | 0.912 | 2.52  | 0.335 | -1.87 | 0.005 | 1.91  | 0.484 | 1.95  | 0.060 |
| 1432507_at   | RIKEN cDNA B430319H21 gene                                               | B430319H21Rik      | 1.21  | 0.736 | -1.62 | 0.034 | -1.87 | 0.033 | 1.07  | 0.441 | 1.05  | 0.865 |
| 1452860_at   | F-box and leucine-rich repeat protein 17                                 | Fbxl17             | -1.28 | 0.074 | -4.57 | 0.011 | -1.87 | 0.000 | -2.24 | 0.002 | -2.52 | 0.000 |
| 1422868_s_at | guanine deaminase                                                        | Gda                | 2.12  | 0.656 | 1.58  | 0.949 | -1.87 | 0.006 | 1.59  | 0.087 | -1.09 | 0.644 |
| 1434571_at   | vacuolar protein sorting 13B (yeast) /// similar to vacuolar protein sor | Vps13b /// LOC666  | -1.03 | 0.556 | -2.27 | 0.040 | -1.87 | 0.009 | -2.07 | 0.001 | -2.24 | 0.019 |
| 1447647_at   | wingless-related MMTV integration site 7A                                | Wnt7a              | -1.23 | 0.284 | 1.61  | 0.806 | -1.87 | 0.016 | 1.07  | 0.739 | 1.01  | 0.847 |
| 1419832_s_at | acid phosphatase, prostate                                               | Acpp               | 1.66  | 0.585 | 1.36  | 0.724 | -1.86 | 0.017 | 1.72  | 0.768 | 2.23  | 0.158 |
| 1451628_a_at | ankyrin 3, epithelial                                                    | Ank3               | 1.05  | 0.758 | -1.36 | 0.208 | -1.86 | 0.004 | -1.84 | 0.016 | -1.36 | 0.128 |
| 1422944_a_at | diaphanous homolog 3 (Drosophila)                                        | Diap3              | -1.46 | 0.136 | -2.67 | 0.017 | -1.86 | 0.010 | -1.51 | 0.109 | -1.53 | 0.041 |
| 1430749_at   | RIKEN cDNA 2810040C05 gene                                               | 2810040C05Rik      | -1.73 | 0.152 | -1.53 | 0.193 | -1.85 | 0.039 | -1.06 | 0.591 | -1.66 | 0.097 |
| 1454462_at   | RIKEN cDNA 6430605C03 gene                                               | 6430605C03Rik      | -1.5  | 0.140 | -1.43 | 0.192 | -1.85 | 0.030 | -1.3  | 0.172 | -1.51 | 0.231 |
| 1457104_at   | RIKEN cDNA D930036F22 gene                                               | D930036F22Rik      | 1.18  | 0.791 | 1.02  | 0.794 | -1.85 | 0.005 | -1.29 | 0.017 | -1.43 | 0.139 |
| 1458023_at   | DNA segment, Chr X, ERATO Doi 697, expressed                             | DXErt697e          | -1.66 | 0.157 | -1.28 | 0.238 | -1.85 | 0.017 | 1.11  | 0.211 | -1.14 | 0.087 |
| 1450781_at   | high mobility group AT-hook 2                                            | Hmg2               | 1.1   | 0.952 | -1.72 | 0.056 | -1.85 | 0.000 | -1.66 | 0.007 | -1.99 | 0.003 |
| 1420542_at   | open reading frame 28                                                    | ORF28              | 1.59  | 0.726 | 1.01  | 0.509 | -1.85 | 0.029 | 1.57  | 0.327 | 1.76  | 0.193 |
| 1445025_at   | expressed sequence AU015536                                              | AU015536           | 2.16  | 0.386 | 2.65  | 0.173 | -1.84 | 0.025 | 1.3   | 0.501 | -1.28 | 0.396 |
| 1426463_at   | gephyrin                                                                 | Gphn               | -1.17 | 0.284 | -4.1  | 0.010 | -1.84 | 0.001 | -1.79 | 0.007 | -1.9  | 0.012 |
| 1434639_at   | kelch repeat and BTB (POZ) domain containing 9                           | Klbtbd9            | -1.15 | 0.176 | -6.56 | 0.031 | -1.84 | 0.006 | -2.04 | 0.010 | -1.98 | 0.107 |
| 1457732_at   | Protein-L-isoaspartate (D-aspartate) O-methyltransferase domain co       | Pcmtd2             | 1.44  | 0.100 | 1.79  | 0.171 | -1.84 | 0.011 | -1.03 | 0.590 | 1.47  | 0.276 |
| 1459603_at   | RIKEN cDNA C330008K14 gene                                               | C330008K14Rik      | -2.71 | 0.051 | -1.18 | 0.349 | -1.83 | 0.041 | -1.28 | 0.184 | -1.11 | 0.386 |
| 1442617_at   | Core binding factor beta                                                 | Cbfb               | 1.05  | 0.699 | -1.32 | 0.257 | -1.83 | 0.001 | 2.13  | 0.471 | 1.31  | 0.299 |
| 1436380_at   | Cdc42 binding protein kinase alpha                                       | Cdc42bpa           | 1.13  | 0.236 | -1.53 | 0.039 | -1.83 | 0.021 | -1.74 | 0.005 | -1.62 | 0.026 |
| 1421449_at   | CUB and Sushi multiple domains 1                                         | Csmd1              | 1.32  | 0.663 | 1.26  | 0.656 | -1.83 | 0.032 | 1.15  | 0.613 | 1.06  | 0.720 |
| 1436356_at   | lectin, galactose binding, soluble 7                                     | Lgals7             | 1.06  | 0.633 | -1.74 | 0.003 | -1.83 | 0.004 | -1.72 | 0.001 | -2.08 | 0.013 |
| 1438217_at   | ataxin 2 binding protein 1                                               | A2bp1              | 3.34  | 0.692 | -1.61 | 0.076 | -1.82 | 0.041 | -1.43 | 0.015 | -2.11 | 0.011 |

|              |                                                                     |                         |       |       |       |       |       |       |       |       |       |       |
|--------------|---------------------------------------------------------------------|-------------------------|-------|-------|-------|-------|-------|-------|-------|-------|-------|-------|
| 1456220_at   | F-box and leucine-rich repeat protein 7                             | Fbxl7                   | 1     | 0.539 | -6.34 | 0.021 | -1.82 | 0.043 | -2.23 | 0.000 | -2.13 | 0.005 |
| 1442305_at   | GTP binding protein 2                                               | Gtppbp2                 | -1.3  | 0.252 | -1.6  | 0.068 | -1.82 | 0.025 | -1.14 | 0.324 | 1.25  | 0.148 |
| 1456344_at   | Tenascin C                                                          | Tnc                     | 1.17  | 0.774 | -1.05 | 0.767 | -1.82 | 0.023 | -1.56 | 0.109 | -2.42 | 0.052 |
| 1429347_at   | Bcl2-like 14 (apoptosis facilitator)                                | Bcl2l14                 | -1.24 | 0.459 | 1.22  | 0.336 | -1.81 | 0.038 | -1.69 | 0.133 | 1.06  | 0.743 |
| 1453895_at   | RIKEN cDNA C330026N13 gene                                          | C330026N13Rik           | -1.09 | 0.549 | 1.16  | 0.151 | -1.81 | 0.047 | 2.57  | 0.929 | -1.13 | 0.374 |
| 1439327_at   | collagen and calcium binding EGF domains 1                          | Ccbe1                   | 1.24  | 0.281 | -1.6  | 0.239 | -1.81 | 0.030 | -1.54 | 0.200 | -2.18 | 0.078 |
| 1448066_at   | hypothetical LOC552909                                              | LOC552909               | 1.43  | 0.235 | -1.39 | 0.122 | -1.81 | 0.050 | -1.37 | 0.205 | -1.15 | 0.260 |
| 1456927_at   | microtubule associated serine/threonine kinase 2                    | Mast2                   | -1.51 | 0.227 | -1.34 | 0.235 | -1.81 | 0.004 | -1.73 | 0.013 | -1.47 | 0.131 |
| 1456214_at   | protocadherin 7                                                     | Pcdh7                   | 1.03  | 0.603 | -1.47 | 0.021 | -1.81 | 0.015 | -1.71 | 0.019 | -2.25 | 0.150 |
| 1450344_a_at | prostaglandin E receptor 3 (subtype EP3)                            | Ptger3                  | -1.13 | 0.778 | -1.2  | 0.398 | -1.81 | 0.023 | 1.04  | 0.842 | 1     | 0.825 |
| 1440931_at   | scratch homolog 2, zinc finger protein (Drosophila)                 | Scr2                    | 2.34  | 0.515 | 1.68  | 0.788 | -1.81 | 0.020 | -1.14 | 0.422 | 1.93  | 0.494 |
| 1450286_at   | natriuretic peptide receptor 3                                      | Npr3                    | 1.27  | 0.507 | -1.23 | 0.377 | -1.8  | 0.017 | -1    | 0.938 | -1.45 | 0.062 |
| 1434450_s_at | adrenergic receptor kinase, beta 2                                  | Adrbk2                  | 1.67  | 0.310 | 1.13  | 0.750 | -1.79 | 0.012 | 1.16  | 0.783 | -1.19 | 0.372 |
| 1418003_at   | RIKEN cDNA 1190002H23 gene                                          | 1190002H23Rik           | -1.29 | 0.114 | 1.07  | 0.763 | -1.78 | 0.008 | -1.33 | 0.201 | 1.33  | 0.437 |
| 1442072_at   | RIKEN cDNA C230081A13 gene                                          | C230081A13Rik           | 1.68  | 0.155 | -1    | 0.448 | -1.78 | 0.023 | -1.18 | 0.240 | -1.27 | 0.078 |
| 1442041_at   | hypothetical LOC552876                                              | LOC552876               | -1.05 | 0.428 | 1.02  | 0.674 | -1.78 | 0.042 | 1.01  | 0.820 | -1.04 | 0.363 |
| 1436910_at   | RAS protein activator like 2                                        | Rasal2                  | 1.04  | 0.327 | -2.91 | 0.008 | -1.78 | 0.017 | -1.88 | 0.001 | -1.98 | 0.002 |
| 1422689_at   | RIKEN cDNA 4930547C10 gene                                          | 4930547C10Rik           | 1.19  | 0.899 | 1.47  | 0.674 | -1.77 | 0.012 | -1.93 | 0.082 | 1.37  | 0.696 |
| 1438473_at   | ADP-ribosylation factor-like 15                                     | Arl15                   | 1.48  | 0.871 | -3.88 | 0.021 | -1.77 | 0.011 | -1.64 | 0.059 | -1.74 | 0.054 |
| 1422741_a_at | bobby sox homolog (Drosophila)                                      | Bbx                     | 3.72  | 0.186 | -1.58 | 0.139 | -1.77 | 0.049 | 1.05  | 0.924 | -2.23 | 0.025 |
| 1437898_at   | RIKEN cDNA C920009B18 gene                                          | C920009B18Rik           | 1.6   | 0.793 | 1.17  | 0.712 | -1.77 | 0.012 | 1.19  | 0.730 | 1.24  | 0.737 |
| 1450768_at   | discs, large homolog 1 (Drosophila)                                 | Dlgh1                   | 1.22  | 0.982 | -1.55 | 0.096 | -1.77 | 0.007 | -1.68 | 0.005 | -2.35 | 0.001 |
| 1459242_at   | ELOVL family member 5, elongation of long chain fatty acids (yeast) | Elovl5                  | 1.17  | 0.775 | -1.07 | 0.626 | -1.77 | 0.010 | -1.06 | 0.804 | 1.62  | 0.068 |
| 1450063_at   | formin 2                                                            | Fmn2                    | -1.57 | 0.024 | -2.47 | 0.003 | -1.77 | 0.006 | -1.48 | 0.012 | -1.74 | 0.007 |
| 1417944_at   | guanine nucleotide binding protein (G protein), gamma 4 subunit     | Gng4                    | 1.16  | 0.714 | 1.39  | 0.956 | -1.77 | 0.038 | -1.37 | 0.165 | 2.38  | 0.362 |
| 1450786_x_at | similar to PDZ and LIM domain protein 5 (Enigma homolog) (Enigma)   | LOC669660               | 1.02  | 0.849 | -1.74 | 0.031 | -1.77 | 0.021 | -1.76 | 0.004 | -1.84 | 0.009 |
| 1453982_at   | transformed mouse 3T3 cell double minute 4                          | Mdm4                    | -1.61 | 0.084 | 1.02  | 0.557 | -1.77 | 0.038 | 1.3   | 0.308 | 1.36  | 0.660 |
| 1455204_at   | phosphatidylinositol transfer protein, cytoplasmic 1                | Pitpnc1                 | -1.07 | 0.436 | -3.71 | 0.010 | -1.77 | 0.040 | -2.02 | 0.012 | -2.17 | 0.007 |
| 1449766_at   | synaptotagmin VI                                                    | Syt6                    | 1.49  | 0.253 | 1.7   | 0.305 | -1.77 | 0.039 | 1.07  | 0.695 | 1.9   | 0.574 |
| 1440726_at   | RIKEN cDNA A230062I15 gene                                          | A230062I15Rik           | -1.37 | 0.240 | 2.57  | 0.545 | -1.76 | 0.049 | 1.73  | 0.346 | -1.23 | 0.406 |
| 1460006_at   | AT motif binding factor 1                                           | Atbf1                   | -1.14 | 0.107 | -1.9  | 0.002 | -1.76 | 0.002 | -1.99 | 0.000 | -2.15 | 0.002 |
| 1450509_at   | carbohydrate sulfotransferase 11                                    | Chst11                  | -1.11 | 0.224 | -1.94 | 0.010 | -1.76 | 0.003 | -1.41 | 0.089 | -1.45 | 0.092 |
| 1456022_at   | homeodomain interacting protein kinase 2                            | Hipk2                   | 1.01  | 0.934 | -1.81 | 0.048 | -1.76 | 0.024 | -1.99 | 0.001 | -2.01 | 0.024 |
| 1444989_at   | hypothetical protein LOC665914 /// hypothetical protein LOC671445   | LOC665914 /// LOC671445 | 1.28  | 0.892 | 1.5   | 0.333 | -1.76 | 0.017 | -1.35 | 0.199 | -1.69 | 0.170 |
| 1428509_at   | myosin IE                                                           | Myo1e                   | 1.14  | 0.661 | -2.21 | 0.027 | -1.76 | 0.006 | -2.05 | 0.009 | -2.04 | 0.005 |
| 1422324_a_at | parathyroid hormone-like peptide                                    | Pthlh                   | 1.35  | 0.896 | 1.45  | 0.139 | -1.76 | 0.029 | -1.17 | 0.434 | 3.63  | 0.053 |
| 1434804_at   | SEC15-like 2 (S. cerevisiae)                                        | Sec15l2                 | -1.23 | 0.223 | -3.11 | 0.051 | -1.76 | 0.009 | -1.92 | 0.002 | -2.06 | 0.002 |
| 1434222_at   | signal-induced proliferation-associated 1 like 1                    | Sipa1l1                 | 1.05  | 0.438 | -1.77 | 0.001 | -1.76 | 0.006 | -1.71 | 0.008 | -1.87 | 0.001 |
| 1457452_at   | expressed sequence AA407782                                         | AA407782                | -1.08 | 0.393 | -1.17 | 0.264 | -1.75 | 0.033 | 2.09  | 0.860 | 1.09  | 0.981 |
| 1425955_at   | caveolin 2                                                          | Cav2                    | 1.35  | 0.968 | 1.72  | 0.796 | -1.75 | 0.019 | 1.6   | 0.222 | 1.12  | 0.730 |
| 1434683_at   | Cut-like 1 (Drosophila)                                             | Cutl1                   | -1.14 | 0.164 | -2.09 | 0.007 | -1.75 | 0.004 | -1.96 | 0.003 | -2.06 | 0.003 |
| 1452343_at   | DNA segment, Chr 18, ERATO Doi 653, expressed                       | D18Ert653e              | 1.21  | 0.888 | -1.57 | 0.124 | -1.75 | 0.006 | -2.07 | 0.045 | -2.18 | 0.002 |
| 1460490_at   | mitochondrial ribosomal protein L15                                 | Mrp15                   | 1.93  | 0.420 | 1.72  | 0.186 | -1.75 | 0.046 | -1.94 | 0.025 | -1.44 | 0.193 |
| 1436764_at   | par-3 (partitioning defective 3) homolog (C. elegans)               | Pard3                   | 1.33  | 0.473 | -2.62 | 0.028 | -1.75 | 0.004 | -1.7  | 0.000 | -1.97 | 0.074 |
| 1449351_s_at | platelet-derived growth factor, C polypeptide                       | Pdgfc                   | 1.07  | 0.742 | -1.92 | 0.015 | -1.75 | 0.012 | -1.91 | 0.007 | -1.86 | 0.000 |
| 1431851_at   | RIKEN cDNA 4930534P07 gene                                          | 4930534P07Rik           | 1.02  | 0.594 | 1.52  | 0.898 | -1.74 | 0.043 | 2.13  | 0.040 | 1.22  | 0.377 |
| 1449520_at   | tetratricopeptide repeat domain 28                                  | Ttc28                   | -1.28 | 0.065 | -2.61 | 0.020 | -1.74 | 0.010 | -1.92 | 0.002 | -2.11 | 0.036 |
| 1445885_at   | ubiquitin-conjugating enzyme E2D 2                                  | Ube2d2                  | 1.3   | 0.666 | 1.21  | 0.403 | -1.74 | 0.018 | 1.31  | 0.770 | 1.51  | 0.982 |
| 1451577_at   | zinc finger and BTB domain containing 20                            | Zbtb20                  | 1.12  | 0.362 | -2.11 | 0.005 | -1.74 | 0.009 | -1.59 | 0.040 | -2.37 | 0.001 |
| 1459998_at   | zinc finger protein 407                                             | Zfp407                  | 1.05  | 0.681 | -3.13 | 0.001 | -1.74 | 0.002 | -2.18 | 0.004 | -2.23 | 0.012 |
| 1431368_at   | RIKEN cDNA 4930404N11 gene                                          | 4930404N11Rik           | 1.01  | 0.870 | -1.21 | 0.380 | -1.73 | 0.042 | -1.72 | 0.079 | 1.12  | 0.449 |
| 1433894_at   | expressed sequence AI591476                                         | AI591476                | 2.21  | 0.333 | 1.1   | 0.303 | -1.73 | 0.017 | -1.49 | 0.026 | -1.68 | 0.077 |
| 1453705_at   | RIKEN cDNA B230110C06 gene                                          | B230110C06Rik           | -1.77 | 0.135 | -1.57 | 0.298 | -1.73 | 0.047 | 2.82  | 0.591 | 1.25  | 0.787 |
| 1454780_at   | UDP-N-acetyl-alpha-D-galactosamine:polypeptide N-acetylgalactose    | Galnt4                  | -1.13 | 0.099 | -1.97 | 0.000 | -1.73 | 0.000 | -1.49 | 0.000 | -1.89 | 0.000 |
| 1443201_at   | Glypican 6                                                          | Gpc6                    | -1.08 | 0.354 | 1.11  | 0.610 | -1.73 | 0.004 | -1.01 | 0.724 | -1.59 | 0.179 |
| 1418272_at   | 3-oxoacid CoA transferase 2A                                        | Oxct2a                  | -1.49 | 0.099 | -1.29 | 0.094 | -1.73 | 0.034 | 1.52  | 0.310 | 1.49  | 0.864 |
| 1444738_at   | RIKEN cDNA 5730419I09 gene                                          | 5730419I09Rik           | -1.16 | 0.382 | 1.65  | 0.341 | -1.72 | 0.038 | -1.07 | 0.362 | -1.09 | 0.413 |
| 1447104_at   | AT rich interactive domain 1A (Swi1 like)                           | Arid1a                  | -1.04 | 0.543 | -1.46 | 0.176 | -1.72 | 0.042 | 1.35  | 0.867 | 1.31  | 0.028 |

|              |                                                                       |                    |       |       |       |       |       |       |       |       |       |       |
|--------------|-----------------------------------------------------------------------|--------------------|-------|-------|-------|-------|-------|-------|-------|-------|-------|-------|
| 1453280_at   | melanoma antigen, family B, 5 /// similar to Melanoma-associated an   | Mageb5 /// LOC6262 | -1.31 | 0.198 | -1.18 | 0.288 | -1.72 | 0.010 | 2.86  | 0.042 | -1.03 | 0.804 |
| 1457753_at   | toll-like receptor 13                                                 | Tlr13              | -1.26 | 0.738 | 1.02  | 0.683 | -1.72 | 0.044 | -1.49 | 0.060 | 1.48  | 0.538 |
| 1448017_at   | ubiquitin associated protein 2-like                                   | Ubap2l             | -1.22 | 0.271 | -1.52 | 0.157 | -1.72 | 0.041 | -2.09 | 0.039 | 1.76  | 0.054 |
| 1430199_at   | RIKEN cDNA 1700007E05 gene                                            | 1700007E05Rik      | 2.17  | 0.968 | -1.19 | 0.262 | -1.71 | 0.026 | -1.4  | 0.187 | 2.31  | 0.065 |
| 1453828_at   | RIKEN cDNA 4932422M17 gene                                            | 4932422M17Rik      | 1.62  | 0.156 | 1.07  | 0.902 | -1.71 | 0.046 | 1.82  | 0.184 | 2.13  | 0.197 |
| 1433728_at   | cDNA sequence BC038479                                                | BC038479           | 1.33  | 0.831 | 2.12  | 0.745 | -1.71 | 0.010 | -1.22 | 0.248 | 1.41  | 0.382 |
| 1416846_a_at | PDZ domain containing RING finger 3                                   | Pdzrn3             | 1.32  | 0.624 | -1.43 | 0.178 | -1.71 | 0.011 | -1.86 | 0.006 | -2.09 | 0.001 |
| 1429449_at   | sterile alpha motif domain containing 4                               | Samd4              | 1.3   | 0.449 | -1.28 | 0.218 | -1.71 | 0.009 | -1.48 | 0.013 | -1.7  | 0.010 |
| 1424923_at   | serine (or cysteine) peptidase inhibitor, clade A, member 3G          | Serpina3g          | 2.88  | 0.500 | 1.01  | 0.347 | -1.71 | 0.045 | 2.08  | 0.608 | 1.76  | 0.618 |
| 1446396_at   | Angiotensin-like 1                                                    | Angptl1            | 1.57  | 0.688 | -1.02 | 0.777 | -1.7  | 0.044 | -1.14 | 0.353 | -1.21 | 0.401 |
| 1437531_at   | transient receptor potential cation channel, subfamily M, member 1    | Trpm1              | 1.03  | 0.802 | 1.25  | 0.909 | -1.7  | 0.043 | -1.43 | 0.078 | 1.15  | 0.037 |
| 1436047_at   | gene model 672, (NCBI)                                                | Gm672              | -1.12 | 0.226 | -2.63 | 0.015 | -1.69 | 0.000 | -2.21 | 0.001 | -2.44 | 0.000 |
| 1429902_at   | RIKEN cDNA 5830443J22 gene                                            | 5830443J22Rik      | 1.17  | 0.341 | 1.03  | 0.632 | -1.68 | 0.036 | -1.89 | 0.072 | -1.91 | 0.068 |
| 1458256_at   | RIKEN cDNA 5830446M03 gene                                            | 5830446M03Rik      | -1.05 | 0.989 | 1.77  | 0.466 | -1.68 | 0.041 | -1.26 | 0.131 | -1.12 | 0.508 |
| 1445866_at   | microtubule associated serine/threonine kinase family member 4        | Mast4              | 1.02  | 0.901 | -1.14 | 0.275 | -1.68 | 0.046 | -1.24 | 0.167 | -2.24 | 0.007 |
| 1421515_at   | nuclear receptor subfamily 6, group A, member 1                       | Nr6a1              | 1.1   | 0.635 | -1.99 | 0.134 | -1.68 | 0.021 | 1.02  | 0.930 | 1.03  | 0.621 |
| 1454711_at   | triple functional domain (PTPRF interacting)                          | Trio               | 1.12  | 0.560 | -1.51 | 0.126 | -1.68 | 0.005 | -2.53 | 0.002 | -2.31 | 0.001 |
| 1446906_at   | expressed sequence C81615                                             | C81615             | 1.11  | 0.564 | -1.2  | 0.410 | -1.67 | 0.029 | -1.42 | 0.178 | -1.38 | 0.225 |
| 1417251_at   | palmdelphin                                                           | Palmd              | 2.05  | 0.976 | -1.12 | 0.390 | -1.67 | 0.042 | 1.49  | 0.864 | 1.84  | 0.784 |
| 1418310_a_at | retinaldehyde binding protein 1                                       | Rlbp1              | 1.93  | 0.641 | 1.43  | 0.808 | -1.67 | 0.029 | 1.48  | 0.103 | -1.03 | 0.566 |
| 1443896_at   | TBC1 domain family, member 5                                          | Tbc1d5             | -1.07 | 0.568 | -2.53 | 0.002 | -1.67 | 0.015 | -1.32 | 0.087 | -1.8  | 0.003 |
| 1434880_at   | ets variant gene 6 (TEL oncogene)                                     | Etv6               | 1.08  | 0.579 | -1.4  | 0.093 | -1.66 | 0.003 | -1.93 | 0.003 | -2.34 | 0.001 |
| 1448765_at   | Fyn proto-oncogene                                                    | Fyn                | -1.15 | 0.180 | -2.22 | 0.004 | -1.66 | 0.007 | -1.92 | 0.000 | -2.1  | 0.002 |
| 1455314_at   | LIM domain containing preferred translocation partner in lipoma       | Lpp                | -1.14 | 0.045 | -1.94 | 0.001 | -1.66 | 0.004 | -1.55 | 0.000 | -1.99 | 0.009 |
| 1421615_at   | myosin XV                                                             | Myo15              | 1.72  | 0.014 | 2.03  | 0.055 | -1.66 | 0.007 | 1.15  | 0.349 | 1.1   | 0.928 |
| 1423983_at   | seizure related 6 homolog like 2                                      | Sez6l2             | 2.17  | 0.148 | 1.5   | 0.439 | -1.66 | 0.012 | -1.53 | 0.123 | 1.43  | 0.190 |
| 1424531_a_at | transcription elongation factor A (SII), 3                            | Tcea3              | -1.03 | 0.620 | -1.41 | 0.118 | -1.66 | 0.000 | 1.13  | 0.866 | 2.02  | 0.230 |
| 1449530_at   | trichorhinopalangeal syndrome I (human)                               | Trps1              | 1.33  | 0.333 | -1.92 | 0.043 | -1.66 | 0.005 | -1.63 | 0.004 | -1.85 | 0.075 |
| 1454286_at   | RIKEN cDNA 1110004M10 gene                                            | 1110004M10Rik      | -1.04 | 0.962 | -1.68 | 0.175 | -1.65 | 0.027 | -1    | 0.864 | 1.01  | 0.375 |
| 1430279_at   | RIKEN cDNA 3110038A09 gene                                            | 3110038A09Rik      | 3.07  | 0.620 | -1.64 | 0.129 | -1.65 | 0.023 | 1.13  | 0.560 | 1.18  | 0.885 |
| 1453512_at   | RIKEN cDNA 5830407P18 gene                                            | 5830407P18Rik      | 1.19  | 0.430 | -1.14 | 0.529 | -1.65 | 0.049 | -1.33 | 0.247 | -2.41 | 0.013 |
| 1430351_at   | spermatogenesis associated 18                                         | Spta18             | 1.43  | 0.487 | 1.52  | 0.552 | -1.65 | 0.047 | -2.02 | 0.028 | 1.21  | 0.771 |
| 1432460_at   | RIKEN cDNA 1700125F08 gene                                            | 1700125F08Rik      | -1.49 | 0.259 | -1.42 | 0.282 | -1.64 | 0.037 | 1.54  | 0.716 | 1.14  | 0.855 |
| 1452366_at   | RIKEN cDNA 4732435N03 gene                                            | 4732435N03Rik      | -1.29 | 0.286 | -2.82 | 0.035 | -1.64 | 0.017 | -1.55 | 0.003 | -1.94 | 0.000 |
| 1439274_at   | RIKEN cDNA A230083H22 gene                                            | A230083H22Rik      | 1.1   | 0.691 | -1.07 | 0.485 | -1.64 | 0.033 | 1.38  | 0.799 | -1.27 | 0.250 |
| 1436440_at   | RIKEN cDNA B230107K20 gene                                            | B230107K20Rik      | -1.38 | 0.223 | -1.67 | 0.187 | -1.64 | 0.011 | -1.58 | 0.030 | -1.69 | 0.130 |
| 1442972_at   | Coronin, actin binding protein 1C                                     | Coro1c             | 1.98  | 0.476 | 1.21  | 0.909 | -1.64 | 0.001 | -1.21 | 0.130 | -1.39 | 0.139 |
| 1438018_at   | hook homolog 1 (Drosophila)                                           | Hook1              | 1.33  | 0.937 | -1.18 | 0.318 | -1.64 | 0.041 | -1.13 | 0.333 | -1.84 | 0.081 |
| 1453490_at   | spindle assembly 6 homolog (C. elegans)                               | Sass6              | 1.47  | 0.794 | 1.91  | 0.344 | -1.64 | 0.012 | -1    | 0.900 | 1.09  | 0.276 |
| 1441711_at   | unc-45 homolog B (C. elegans)                                         | Unc45b             | -1.35 | 0.337 | 1.35  | 0.952 | -1.64 | 0.031 | 1.13  | 0.547 | -1    | 0.579 |
| 1453262_at   | RIKEN cDNA 2810032G03 gene                                            | 2810032G03Rik      | 2.65  | 0.747 | -1.19 | 0.336 | -1.63 | 0.043 | 1.91  | 0.244 | 1.18  | 0.775 |
| 1436264_at   | cDNA sequence BC025920                                                | BC025920           | -1.31 | 0.284 | -1.41 | 0.082 | -1.63 | 0.043 | -1.23 | 0.289 | 1.15  | 0.783 |
| 1433311_at   | RIKEN cDNA D530031A16 gene                                            | D530031A16Rik      | -1.13 | 0.427 | -1.55 | 0.303 | -1.63 | 0.019 | -1.13 | 0.148 | -1.54 | 0.195 |
| 1451685_at   | myeloid/lymphoid or mixed lineage-leukemia translocation to 6 homc    | Mllt6 /// LOC63949 | 1.08  | 0.517 | 1.62  | 0.440 | -1.63 | 0.004 | 1.21  | 0.957 | 1.13  | 0.618 |
| 1457864_at   | RAB11 family interacting protein 3 (class II)                         | Rab11fip3          | 1.19  | 0.317 | -1.3  | 0.481 | -1.63 | 0.023 | 2.16  | 0.157 | 3.29  | 0.523 |
| 1441969_at   | tripartite motif-containing 36                                        | Trim36             | 1.32  | 0.879 | 1.38  | 0.436 | -1.63 | 0.049 | -1.08 | 0.699 | 1.84  | 0.024 |
| 1457793_a_at | Wolf-Hirschhorn syndrome candidate 1-like 1 (human)                   | Whsc1l1            | 1.62  | 0.488 | 1.23  | 0.751 | -1.63 | 0.040 | -1.33 | 0.089 | -1.52 | 0.003 |
| 1433182_at   | RIKEN cDNA 4930431N21 gene                                            | 4930431N21Rik      | -1.33 | 0.314 | -1.56 | 0.166 | -1.62 | 0.008 | -1.19 | 0.348 | 1.3   | 0.232 |
| 1429691_at   | RIKEN cDNA 5430405N12 gene                                            | 5430405N12Rik      | 1.17  | 0.640 | -1.5  | 0.027 | -1.62 | 0.027 | -1.25 | 0.000 | -1.57 | 0.211 |
| 1444814_at   | DNA segment, Chr 15, ERATO Doi 180, expressed                         | D15Ertd180e        | 1.18  | 0.466 | -1.65 | 0.032 | -1.62 | 0.005 | -1.15 | 0.503 | 1     | 0.517 |
| 1458807_at   | erythrocyte protein band 4.1                                          | Epb4.1             | 1.42  | 0.633 | 1.54  | 0.593 | -1.62 | 0.040 | 1.07  | 0.798 | 1.12  | 0.686 |
| 1455982_at   | jumonji domain containing 4                                           | Jmjd4              | -1.06 | 0.527 | 1.3   | 0.986 | -1.62 | 0.006 | 1.02  | 0.498 | -1.33 | 0.143 |
| 1426994_at   | PH domain and leucine rich repeat protein phosphatase                 | Phlpp              | 1.01  | 0.795 | -2.06 | 0.019 | -1.62 | 0.001 | -1.88 | 0.000 | -2.1  | 0.001 |
| 1438377_x_at | solute carrier family 13 (sodium-dependent dicarboxylate transporter  | Slc13a3            | 2.06  | 0.327 | 1.74  | 0.352 | -1.62 | 0.038 | 1.34  | 0.949 | -1.41 | 0.166 |
| 1452714_at   | tetratricopeptide repeat, ankyrin repeat and coiled-coil containing 1 | Tanc1              | 1.07  | 0.602 | -1.79 | 0.011 | -1.62 | 0.004 | -1.86 | 0.009 | -1.89 | 0.001 |
| 1436746_at   | WNK lysine deficient protein kinase 1                                 | Wnk1               | -1.29 | 0.169 | -1.72 | 0.009 | -1.62 | 0.046 | -1.4  | 0.041 | -1.23 | 0.085 |
| 1452025_a_at | zinc finger protein 2                                                 | Zfp2               | 2.47  | 0.221 | 1.92  | 0.307 | -1.62 | 0.039 | 1.24  | 0.038 | 1.5   | 0.939 |
| 1451332_at   | zinc finger protein 521                                               | Zfp521             | -1.06 | 0.376 | -3.24 | 0.019 | -1.62 | 0.003 | -1.37 | 0.009 | -1.77 | 0.001 |



|              |                                                                       |                    |       |       |       |       |       |       |       |       |       |       |
|--------------|-----------------------------------------------------------------------|--------------------|-------|-------|-------|-------|-------|-------|-------|-------|-------|-------|
| 1439485_at   | zinc finger protein 608 /// RIKEN cDNA D430007A19 gene                | Zfp608 /// D430007 | -1.14 | 0.379 | -1.05 | 0.732 | -1.62 | 0.026 | 1.22  | 0.620 | -1.06 | 0.523 |
| 1442897_at   | RIKEN cDNA 2610024E20 gene                                            | 2610024E20Rik      | -1.09 | 0.588 | -1.08 | 0.518 | -1.61 | 0.016 | 1.07  | 0.525 | -1.39 | 0.178 |
| 1439394_x_at | cell division cycle 20 homolog (S. cerevisiae)                        | Cdc20              | 1.24  | 0.754 | 1.44  | 0.906 | -1.61 | 0.016 | 1.15  | 0.349 | 1.71  | 0.405 |
| 1443611_at   | Dnaj (Hsp40) homolog, subfamily B, member 4                           | Dnajb4             | 1.13  | 0.929 | 1.26  | 0.301 | -1.61 | 0.040 | 1.07  | 0.875 | 1.04  | 0.705 |
| 1440926_at   | FMS-like tyrosine kinase 1                                            | Flt1               | 1.08  | 0.659 | -1.44 | 0.149 | -1.61 | 0.012 | 1.03  | 0.750 | -1.41 | 0.207 |
| 1427199_at   | furry homolog-like (Drosophila)                                       | Fryl               | -1.07 | 0.138 | -2.02 | 0.005 | -1.61 | 0.012 | -1.39 | 0.091 | -1.43 | 0.008 |
| 1456835_at   | Hypothetical protein LOC624549                                        | LOC624549          | 1.94  | 0.351 | 1.2   | 0.397 | -1.61 | 0.014 | 1.09  | 0.630 | 1.31  | 0.550 |
| 1455720_at   | a disintegrin-like and metallopeptidase (reprolysin type) with thromb | Adams2             | 1.02  | 0.969 | -1.74 | 0.023 | -1.6  | 0.049 | -1.05 | 0.842 | -1.56 | 0.052 |
| 1420577_at   | activation-induced cytidine deaminase                                 | Aicda              | -1.31 | 0.287 | 1.34  | 0.764 | -1.6  | 0.015 | 1.16  | 0.542 | 1.36  | 0.088 |
| 1418028_at   | dopachrome tautomerase                                                | Dct                | 1.4   | 0.173 | 1.82  | 0.111 | -1.6  | 0.037 | 1.04  | 0.729 | 1.41  | 0.435 |
| 1439397_at   | formin 1                                                              | Fmn1               | -1.32 | 0.348 | -4.27 | 0.117 | -1.6  | 0.001 | -2.56 | 0.002 | -2.54 | 0.000 |
| 1436743_at   | immunoglobulin superfamily, member 4                                  | Igsf4d             | -1.4  | 0.197 | -1.16 | 0.506 | -1.6  | 0.045 | -1.33 | 0.249 | 2.69  | 0.056 |
| 1432043_at   | smu-1 suppressor of mec-8 and unc-52 homolog (C. elegans)             | Smu1               | -1.23 | 0.348 | 1.12  | 0.988 | -1.6  | 0.036 | 3.06  | 0.330 | -1.21 | 0.412 |
| 1437197_at   | sorbin and SH3 domain containing 2                                    | Sorbs2             | 1.18  | 0.863 | -1.51 | 0.145 | -1.6  | 0.006 | -1.6  | 0.027 | -1.55 | 0.007 |
| 1416434_at   | Bcl2-like 10                                                          | Bcl2l10            | -2.42 | 0.062 | -1.01 | 0.807 | -1.59 | 0.039 | 1.75  | 0.454 | 1.05  | 0.328 |
| 1440967_at   | Brain protein I3 /// BAI1-associated protein 2-like 1                 | Bri3 /// Baiap2l1  | 1.03  | 0.795 | -1.26 | 0.185 | -1.59 | 0.014 | 1.55  | 0.513 | 1.03  | 0.975 |
| 1449581_at   | EMI domain containing 1                                               | Emid1              | 1.4   | 0.055 | 1.74  | 0.100 | -1.59 | 0.005 | 1.08  | 0.892 | 3.3   | 0.015 |
| 1456885_at   | microtubule associated monooxygenase, calponin and LIM domain co      | Mical2             | 1.34  | 0.833 | -1    | 0.305 | -1.59 | 0.018 | -1.61 | 0.029 | -1.77 | 0.029 |
| 1459991_at   | myosin IXa                                                            | Myo9a              | -1.14 | 0.411 | -1.6  | 0.142 | -1.59 | 0.009 | -1.19 | 0.495 | -1.05 | 0.662 |
| 1439187_at   | vacuolar protein sorting 13 D (yeast)                                 | Vps13d             | 1.26  | 0.453 | -1.27 | 0.211 | -1.59 | 0.003 | -1.59 | 0.001 | -1.72 | 0.001 |
| 1444868_at   | RIKEN cDNA 4921529O18 gene                                            | 4921529O18Rik      | -1.09 | 0.550 | 1.17  | 0.951 | -1.58 | 0.006 | -1.36 | 0.167 | 1.58  | 0.957 |
| 1439331_at   | RIKEN cDNA 4932439E07 gene                                            | 4932439E07Rik      | 2.62  | 0.355 | 1.12  | 0.644 | -1.58 | 0.044 | -1.41 | 0.268 | 2.09  | 0.020 |
| 1452641_at   | cDNA sequence BC028663                                                | BC028663           | -1    | 0.882 | 1.34  | 0.680 | -1.58 | 0.042 | -1.25 | 0.331 | 1.54  | 0.476 |
| 1444855_at   | B-cell CLL/lymphoma 9-like                                            | Bcl9l              | -1.69 | 0.164 | -1.04 | 0.717 | -1.58 | 0.036 | 1.2   | 0.470 | -1.91 | 0.114 |
| 1442464_at   | F-box and leucine-rich repeat protein 20                              | Fbxl20             | 1.18  | 0.834 | 1.03  | 0.691 | -1.58 | 0.049 | 1.38  | 0.136 | 1.1   | 0.125 |
| 1451871_a_at | growth hormone receptor                                               | Ghr                | 2.77  | 0.574 | 1.5   | 0.225 | -1.58 | 0.012 | -1.26 | 0.063 | -1.76 | 0.024 |
| 1434418_at   | longevity assurance homolog 6 (S. cerevisiae)                         | Lass6              | -1.22 | 0.024 | -2.06 | 0.010 | -1.58 | 0.020 | -1.66 | 0.006 | -1.87 | 0.015 |
| 1443939_at   | similar to C05G5.5 /// similar to C05G5.5 /// similar to C05G5.5      | LOC230628 /// LOC  | -1.29 | 0.188 | -2.16 | 0.065 | -1.58 | 0.014 | -1.82 | 0.008 | -1.21 | 0.201 |
| 1452274_at   | zinc finger, AN1-type domain 3                                        | Zfand3             | -1.12 | 0.345 | -1.63 | 0.103 | -1.58 | 0.011 | -1.42 | 0.002 | -1.58 | 0.004 |
| 1447648_at   | RIKEN cDNA 1700021N20 gene                                            | 1700021N20Rik      | 1.66  | 0.797 | 1.68  | 0.451 | -1.57 | 0.032 | 1.97  | 0.255 | 1.38  | 0.688 |
| 1424739_at   | RIKEN cDNA 4932432K03 gene                                            | 4932432K03Rik      | 1.16  | 0.644 | -1.33 | 0.177 | -1.57 | 0.001 | 2.52  | 0.235 | 1.07  | 0.992 |
| 1436143_at   | RIKEN cDNA 4933425L03 gene                                            | 4933425L03Rik      | -1.28 | 0.050 | -1.93 | 0.063 | -1.57 | 0.004 | -1.42 | 0.024 | -1.67 | 0.025 |
| 1430196_at   | RIKEN cDNA 8430408J09 gene                                            | 8430408J09Rik      | -1.18 | 0.405 | 1.02  | 0.766 | -1.57 | 0.038 | -1.14 | 0.201 | -1.35 | 0.068 |
| 1447839_x_at | adrenomedullin                                                        | Adm                | -1.45 | 0.226 | -2.47 | 0.068 | -1.57 | 0.012 | -1.64 | 0.000 | -1.95 | 0.008 |
| 1417950_a_at | apolipoprotein A-II                                                   | Apoa2              | -1.13 | 0.446 | 1.09  | 0.579 | -1.57 | 0.009 | 1.3   | 0.524 | 1.04  | 0.886 |
| 1452251_at   | neurobeachin                                                          | Nbea               | -1.44 | 0.152 | -2.77 | 0.058 | -1.57 | 0.024 | -1.65 | 0.017 | -2.22 | 0.014 |
| 1459372_at   | neuronal PAS domain protein 4                                         | Npas4              | 1.76  | 0.147 | 1.24  | 0.963 | -1.57 | 0.038 | -1.01 | 0.762 | -2.81 | 0.016 |
| 1442430_at   | cDNA sequence BC048562                                                | BC048562           | -1.33 | 0.223 | -1.21 | 0.264 | -1.56 | 0.010 | -1.07 | 0.574 | 1.15  | 0.319 |
| 1421004_at   | centrosomal protein 110                                               | Cep110             | -1.37 | 0.086 | -1.39 | 0.064 | -1.56 | 0.005 | -1.27 | 0.148 | 1.42  | 0.164 |
| 1452265_at   | CLIP associating protein 1                                            | Clasp1             | -1.09 | 0.202 | -1.71 | 0.006 | -1.56 | 0.014 | -1.73 | 0.001 | -1.96 | 0.000 |
| 1459005_at   | RIKEN cDNA D030051N19 gene                                            | D030051N19Rik      | -1.14 | 0.377 | -1.28 | 0.369 | -1.56 | 0.029 | -1.16 | 0.356 | -1.39 | 0.010 |
| 1456067_at   | GLI-Kruppel family member GLI3                                        | Gli3               | -1.02 | 0.632 | -2.15 | 0.005 | -1.56 | 0.025 | -1.77 | 0.019 | -1.8  | 0.008 |
| 1454132_at   | RIKEN cDNA 7630402F16 gene                                            | 7630402F16Rik      | 1.72  | 0.654 | 1.8   | 0.571 | -1.55 | 0.021 | 1.67  | 0.787 | 2.08  | 0.442 |
| 1444343_at   | RIKEN cDNA A130064L14 gene                                            | A130064L14Rik      | -1.24 | 0.176 | -1.18 | 0.481 | -1.55 | 0.029 | -1.09 | 0.305 | -1.5  | 0.185 |
| 1433855_at   | 4-aminobutyrate aminotransferase                                      | Abat               | 2.15  | 0.476 | 1.32  | 0.826 | -1.55 | 0.024 | 1.09  | 0.351 | -1.17 | 0.239 |
| 1460020_at   | hypothetical protein LOC629623                                        | LOC629623          | -1.21 | 0.334 | -1.02 | 0.677 | -1.55 | 0.010 | -1.46 | 0.143 | -1.65 | 0.096 |
| 1451474_a_at | poly (ADP-ribose) polymerase family, member 8                         | Parp8              | 1.15  | 0.213 | -1.22 | 0.210 | -1.55 | 0.006 | -1.53 | 0.001 | -1.59 | 0.005 |
| 1434603_at   | thyroid hormone receptor associated protein 2                         | Thrap2             | 1.03  | 0.170 | -1.49 | 0.000 | -1.55 | 0.024 | -1.64 | 0.014 | -2.04 | 0.025 |
| 1452074_at   | transmembrane protein 135                                             | Tmem135            | -1.19 | 0.289 | -1.21 | 0.383 | -1.55 | 0.005 | -1.76 | 0.074 | 1.15  | 0.829 |
| 1416157_at   | vinculin                                                              | Vcl                | 17.94 | 0.717 | 9.94  | 0.341 | -1.55 | 0.011 | -1.09 | 0.299 | -1.51 | 0.064 |
| 1432088_at   | ventricular zone expressed PH domain homolog 1 (zebrafish)            | Vep1               | 1.49  | 0.415 | 1.21  | 0.461 | -1.55 | 0.043 | 1.71  | 0.208 | -1.17 | 0.222 |
| 1453933_at   | RIKEN cDNA 4933435E02 gene                                            | 4933435E02Rik      | 1.18  | 0.565 | 1.38  | 0.187 | -1.54 | 0.029 | -1.14 | 0.277 | 1.19  | 0.200 |
| 1454310_at   | RIKEN cDNA 5830490A12 gene                                            | 5830490A12Rik      | 1.84  | 0.122 | 2.7   | 0.496 | -1.54 | 0.005 | 1.69  | 0.195 | 1.14  | 0.310 |
| 1451438_s_at | C-type lectin domain family 2, member h                               | Clec2h             | 1.48  | 0.153 | 1.56  | 0.543 | -1.54 | 0.017 | 1.06  | 0.796 | -1.03 | 0.511 |
| 1451279_at   | ELKS/RAB6-interacting/CAST family member 1                            | Erc1               | -1.21 | 0.161 | -2.67 | 0.006 | -1.54 | 0.012 | -1.96 | 0.011 | -2.03 | 0.004 |
| 1449159_at   | guanine nucleotide binding protein, beta 3                            | Gnb3               | -1.48 | 0.212 | -1.4  | 0.171 | -1.54 | 0.030 | 1.37  | 0.344 | 1.16  | 0.995 |
| 1438451_at   | Rho GTPase-activating protein                                         | Grit               | -1.11 | 0.393 | -2.11 | 0.035 | -1.54 | 0.034 | -1.78 | 0.004 | -2.06 | 0.013 |
| 1452982_at   | insulin-like growth factor I receptor                                 | Igf1r              | -1.05 | 0.553 | -2.17 | 0.008 | -1.54 | 0.002 | -1.59 | 0.020 | -1.84 | 0.022 |

|                      |                                                                       |                   |       |       |       |       |       |       |       |       |       |       |
|----------------------|-----------------------------------------------------------------------|-------------------|-------|-------|-------|-------|-------|-------|-------|-------|-------|-------|
| 1438186_at           | PDZ and LIM domain 5                                                  | Pdlim5            | 1.17  | 0.751 | -1.4  | 0.193 | -1.54 | 0.047 | -1.49 | 0.174 | -1.61 | 0.090 |
| 1437602_at           | similar to Hypothetical protein MGC26988                              | RP23-273O7.4      | -1.22 | 0.363 | -1.39 | 0.387 | -1.54 | 0.017 | 1.93  | 0.558 | -2.19 | 0.028 |
| 1455473_at           | ubiquitin specific peptidase 13 (isopeptidase T-3)                    | Usp13             | -1.56 | 0.039 | -1.55 | 0.148 | -1.54 | 0.034 | -1.37 | 0.114 | 1.1   | 0.913 |
| 1454723_at           | RIKEN cDNA 1110033M05 gene                                            | 1110033M05Rik     | 1.06  | 0.927 | -1.57 | 0.007 | -1.53 | 0.004 | -1.38 | 0.011 | -1.67 | 0.003 |
| 1445843_at           | chromodomain helicase DNA binding protein 2                           | Chd2              | -1.25 | 0.315 | -1.33 | 0.313 | -1.53 | 0.022 | -1.34 | 0.028 | -1.17 | 0.454 |
| 1445044_at           | Prostaglandin I2 (prostacyclin) synthase                              | Ptgis             | 2.5   | 0.368 | -1.18 | 0.283 | -1.53 | 0.040 | -1.22 | 0.274 | 1.55  | 0.455 |
| 1428822_a_at         | sorting nexing 24                                                     | Snx24             | -1.09 | 0.370 | -1.98 | 0.016 | -1.53 | 0.043 | -1.58 | 0.015 | -1.83 | 0.000 |
| 1449405_at           | tensin 1                                                              | Tns1              | -1.04 | 0.500 | -1.32 | 0.040 | -1.53 | 0.004 | -1.42 | 0.008 | -1.46 | 0.006 |
| 1454706_at           | UV radiation resistance associated gene                               | Uvrug             | -1.04 | 0.271 | -1.95 | 0.005 | -1.53 | 0.005 | -1.98 | 0.004 | -1.73 | 0.000 |
| 1435930_at           | zinc finger protein 291                                               | Zfp291            | -1.82 | 0.225 | -3.26 | 0.140 | -1.53 | 0.005 | -1.9  | 0.019 | -2.27 | 0.016 |
| 1420931_at           | mitogen activated protein kinase 8                                    | Mapk8             | 1.31  | 0.064 | 1.13  | 0.582 | -1.52 | 0.047 | -1.27 | 0.215 | -1.49 | 0.172 |
| 1418650_at           | spermatogenesis associated 6                                          | Spata6            | 4.9   | 0.268 | 2.65  | 0.957 | -1.52 | 0.003 | -1.07 | 0.421 | -1.18 | 0.252 |
| 1431831_at           | RIKEN cDNA 2210009G21 gene                                            | 2210009G21Rik     | 1.8   | 0.871 | 1.38  | 0.385 | -1.51 | 0.027 | -1.28 | 0.029 | -1.17 | 0.150 |
| 1430362_at           | RIKEN cDNA 5730409N24 gene                                            | 5730409N24Rik     | 1.08  | 0.704 | -1.05 | 0.886 | -1.51 | 0.013 | 1.04  | 0.969 | -1.68 | 0.096 |
| 1435879_at           | thymoma viral proto-oncogene 3                                        | Akt3              | -1.12 | 0.272 | -2.7  | 0.030 | -1.51 | 0.004 | -1.37 | 0.010 | -1.65 | 0.005 |
| 1459457_at           | calcium/calmodulin-dependent protein kinase II, delta                 | Camk2d            | 1.01  | 0.580 | -1.39 | 0.296 | -1.51 | 0.027 | -1.43 | 0.048 | -2.13 | 0.014 |
| 1431354_a_at         | phenylalanine-tRNA synthetase 2 (mitochondrial)                       | Fars2             | 1.04  | 0.699 | -2.29 | 0.027 | -1.51 | 0.022 | -1.48 | 0.030 | -2.01 | 0.002 |
| 1427313_at           | prostaglandin I receptor (IP)                                         | Ptgir             | -2    | 0.130 | -1.68 | 0.132 | -1.51 | 0.012 | 1.34  | 0.285 | 1.29  | 0.906 |
| 1445149_at           | Poliovirus receptor                                                   | Pvr               | 1.33  | 0.458 | -1.22 | 0.211 | -1.51 | 0.020 | 1.78  | 0.214 | 3.13  | 0.150 |
| 1440428_at           | sideroflexin 5                                                        | Sfxn5             | 1.38  | 0.966 | 1.17  | 0.944 | -1.51 | 0.023 | -1.16 | 0.234 | 1.09  | 0.678 |
| 1433719_at           | solute carrier family 9 (sodium/hydrogen exchanger), isoform 9        | Slc9a9            | 1.15  | 0.698 | -1.84 | 0.023 | -1.51 | 0.004 | 1.14  | 0.354 | -1.19 | 0.471 |
| 1429705_at           | sperm acrosome associated 4                                           | Spaca4            | 1.54  | 0.391 | -1.06 | 0.534 | -1.51 | 0.011 | 1.31  | 0.583 | -1.55 | 0.219 |
| 1456147_at           | ST8 alpha-N-acetyl-neuraminide alpha-2,8-sialyltransferase 6          | St8sia6           | 1.48  | 0.610 | -1.2  | 0.492 | -1.51 | 0.013 | -1.43 | 0.092 | -1.11 | 0.329 |
| 1448786_at           | RIKEN cDNA 1100001H23 gene                                            | 1100001H23Rik     | -1.21 | 0.447 | 1.11  | 0.469 | -1.5  | 0.021 | -1.14 | 0.709 | 1.53  | 0.846 |
| 1460475_at           | RIKEN cDNA 3110056J03 gene                                            | 3110056J03Rik     | 1.08  | 0.742 | 1.19  | 0.942 | -1.5  | 0.022 | -1.09 | 0.281 | -1.52 | 0.108 |
| 1454101_at           | RIKEN cDNA 4933401P06 gene                                            | 4933401P06Rik     | -1.07 | 0.458 | 1.43  | 0.582 | -1.5  | 0.015 | 2.06  | 0.354 | 1.55  | 0.563 |
| 1455396_at           | ATPase, class I, type 8B, member 1                                    | Atp8b1            | 1.26  | 0.705 | -1.8  | 0.073 | -1.5  | 0.002 | -1.57 | 0.012 | -1.53 | 0.025 |
| 1431604_a_at         | coiled-coil domain containing 97                                      | Ccdc97            | 1.77  | 0.231 | 2.14  | 0.500 | -1.5  | 0.049 | -1.03 | 0.764 | -1.14 | 0.283 |
| 1457672_at           | chromodomain helicase DNA binding protein 9                           | Chd9              | -1.09 | 0.413 | -1.51 | 0.090 | -1.5  | 0.003 | -1.32 | 0.026 | -1.71 | 0.031 |
| 1419781_at           | RIKEN cDNA D630004N19 gene                                            | D630004N19Rik     | 1.35  | 0.672 | 1.48  | 0.175 | -1.5  | 0.031 | -1.1  | 0.360 | 1.3   | 0.731 |
| 1424801_at           | enabled homolog (Drosophila)                                          | Enah              | 1.09  | 0.807 | -1.52 | 0.114 | -1.5  | 0.010 | -1.24 | 0.138 | -1.61 | 0.008 |
| 1439467_at           | Microtubule-associated protein 4                                      | Mtap4             | 1.05  | 0.612 | -1.02 | 0.940 | -1.5  | 0.021 | -1.17 | 0.436 | -1.75 | 0.045 |
| 1451637_a_at         | mucin 10, submandibular gland salivary mucin                          | Muc10             | 1.46  | 0.652 | 1.08  | 0.415 | -1.5  | 0.021 | 1.37  | 0.532 | -1.15 | 0.426 |
| 1454731_at           | myosin X                                                              | Myo10             | 1.13  | 0.553 | -1.34 | 0.164 | -1.5  | 0.018 | -1.56 | 0.039 | -1.56 | 0.015 |
| 1444085_at           | prenyl (solaneyl) diphosphate synthase, subunit 2                     | Pdss2             | -1.39 | 0.111 | -2.7  | 0.050 | -1.5  | 0.038 | -1.35 | 0.062 | -1.18 | 0.171 |
| 1437113_s_at         | phospholipase D1                                                      | Pld1              | -1.08 | 0.391 | -2.05 | 0.025 | -1.5  | 0.028 | -1.11 | 0.320 | 1.22  | 0.282 |
| 1443406_at           | phospholipid scramblase 4                                             | Plscr4            | 1.07  | 0.999 | 1.06  | 0.931 | -1.5  | 0.046 | -1.56 | 0.129 | 1.48  | 0.285 |
| 1418749_at           | pleckstrin and Sec7 domain containing 3                               | Psd3              | -1.11 | 0.309 | -2.21 | 0.043 | -1.5  | 0.008 | -1.4  | 0.051 | -1.81 | 0.001 |
| 1451041_at           | Rho-associated coiled-coil containing protein kinase 2                | Rock2             | 1.25  | 0.474 | -1.39 | 0.145 | -1.5  | 0.010 | -1.27 | 0.009 | -1.6  | 0.014 |
| AFFX-r2-Bs-phe-3 --- |                                                                       | ---               | -1.28 | 0.333 | -1.46 | 0.293 | -1.49 | 0.001 | 1.4   | 0.036 | 1.01  | 0.552 |
| 1432984_at           | RIKEN cDNA 1700026H06 gene                                            | 1700026H06Rik     | 1.04  | 0.578 | 1.33  | 0.973 | -1.49 | 0.006 | -1.36 | 0.281 | -1.21 | 0.325 |
| 1430115_at           | RIKEN cDNA 4833413E03 gene                                            | 4833413E03Rik     | -1.86 | 0.074 | -2.02 | 0.049 | -1.49 | 0.041 | -1.02 | 0.721 | 1.59  | 0.215 |
| 1442062_at           | RIKEN cDNA 7120426M23 gene                                            | 7120426M23Rik     | -1.21 | 0.193 | -1.28 | 0.141 | -1.49 | 0.004 | -1.19 | 0.144 | -1.18 | 0.238 |
| 1455765_a_at         | ATP-binding cassette, sub-family C (CFTR/MRP), member 8               | Abcc8             | -1.73 | 0.207 | -1.18 | 0.324 | -1.49 | 0.013 | 1.09  | 0.854 | 1.91  | 0.757 |
| 1455979_at           | AT rich interactive domain 1B (Swi1 like)                             | Arid1b            | -1.36 | 0.229 | -3.04 | 0.030 | -1.49 | 0.017 | -2.25 | 0.001 | -2.03 | 0.009 |
| 1447623_s_at         | RIKEN cDNA C130009A20 gene                                            | C130009A20Rik     | -1.64 | 0.226 | -4.15 | 0.099 | -1.49 | 0.029 | -1.74 | 0.005 | -1.69 | 0.008 |
| 1440510_at           | RIKEN cDNA C430002N11 gene                                            | C430002N11Rik     | -1.48 | 0.172 | -1.11 | 0.470 | -1.49 | 0.039 | -1.22 | 0.203 | -1.28 | 0.159 |
| 1442471_at           | Eph receptor B2                                                       | Ephb2             | 1.1   | 0.770 | -1.19 | 0.313 | -1.49 | 0.038 | 1.29  | 0.244 | -1.12 | 0.524 |
| 1438169_a_at         | FERM domain containing 4B                                             | Frm4b             | 1.22  | 0.733 | 1.01  | 0.367 | -1.49 | 0.047 | -1.41 | 0.169 | -1.5  | 0.100 |
| 1430353_at           | GLIS family zinc finger 3                                             | Glis3             | -1.28 | 0.287 | -2.82 | 0.062 | -1.49 | 0.008 | -1.88 | 0.020 | -1.83 | 0.000 |
| 1421902_at           | intersex-like (Drosophila)                                            | Ixl               | -1.01 | 0.935 | 1.32  | 0.590 | -1.49 | 0.016 | 2.04  | 0.420 | 1.91  | 0.740 |
| 1429911_at           | microcephaly, primary autosomal recessive 1                           | Mcp1              | -1.16 | 0.037 | -2.34 | 0.006 | -1.49 | 0.034 | -1.5  | 0.032 | -1.41 | 0.010 |
| 1425164_a_at         | phosphorylase kinase gamma 1                                          | Phkg1             | -1.59 | 0.179 | 1.24  | 0.151 | -1.49 | 0.021 | 1.21  | 0.567 | 1.05  | 0.697 |
| 1419614_at           | phospholipase A2, group XIIB                                          | Pla2g12b          | -1.09 | 0.548 | -1.2  | 0.396 | -1.49 | 0.025 | 1.51  | 0.415 | 1     | 0.815 |
| 1445745_at           | RNA binding motif protein 17 /// similar to RNA binding motif protein | Rbm17 /// LOC5451 | 1.11  | 0.399 | 1.3   | 0.735 | -1.49 | 0.036 | 1.62  | 0.559 | 1.86  | 0.157 |
| 1439302_at           | ubiquitin-activating enzyme E1-like 2                                 | Ube1l2            | -1.06 | 0.526 | -1.57 | 0.038 | -1.49 | 0.015 | -1.32 | 0.003 | -1.47 | 0.018 |
| 1438691_at           | zinc finger, ZZ-type with EF hand domain 1                            | Zzef1             | -1.12 | 0.297 | -1.56 | 0.107 | -1.49 | 0.016 | -1.47 | 0.001 | -1.54 | 0.009 |
| 1443200_at           | hypothetical protein A930011G24                                       | A930011G24        | 1.36  | 0.867 | 1.31  | 0.687 | -1.48 | 0.001 | 1.13  | 0.962 | 1.1   | 0.614 |

|              |                                                                                                           |               |       |       |       |       |       |       |       |       |       |       |
|--------------|-----------------------------------------------------------------------------------------------------------|---------------|-------|-------|-------|-------|-------|-------|-------|-------|-------|-------|
| 1442175_at   | RIKEN cDNA C030027H14 gene                                                                                | C030027H14Rik | -1.31 | 0.060 | -4.62 | 0.014 | -1.48 | 0.005 | -1.6  | 0.022 | -1.78 | 0.019 |
| 1426090_a_at | fer (fms/fps related) protein kinase, testis specific 2                                                   | Fert2         | 4.62  | 0.811 | 3.14  | 0.267 | -1.48 | 0.035 | -1.31 | 0.058 | -1.84 | 0.053 |
| 1455122_at   | patched domain containing 2                                                                               | Ptchd2        | 1.38  | 0.149 | 1.39  | 0.042 | -1.48 | 0.037 | 2.27  | 0.042 | 1.44  | 0.918 |
| 1417700_at   | Rab38, member of RAS oncogene family                                                                      | Rab38         | -1.41 | 0.108 | -1.19 | 0.409 | -1.48 | 0.013 | 1.2   | 0.790 | 1.55  | 0.598 |
| 1429089_s_at | RIKEN cDNA 2900026A02 gene                                                                                | 2900026A02Rik | -1.14 | 0.108 | -1.88 | 0.018 | -1.47 | 0.007 | -1.34 | 0.010 | -1.52 | 0.001 |
| 1438738_at   | CDNA sequence BC010584                                                                                    | BC010584      | -1.62 | 0.167 | 1.09  | 0.929 | -1.47 | 0.018 | 1.33  | 0.547 | 1.15  | 0.643 |
| 1437119_at   | Endoplasmic reticulum (ER) to nucleus signalling 1                                                        | Ern1          | -1.28 | 0.252 | -1.68 | 0.148 | -1.47 | 0.011 | -1.1  | 0.276 | -1.44 | 0.001 |
| 1455729_at   | guanine nucleotide binding protein, alpha q polypeptide                                                   | Gnaq          | -1.26 | 0.287 | -2.02 | 0.098 | -1.47 | 0.017 | -1.76 | 0.008 | -1.79 | 0.009 |
| 1423184_at   | intersectin 2                                                                                             | Itsn2         | -1.1  | 0.516 | -1.24 | 0.195 | -1.47 | 0.005 | 1.04  | 0.738 | -1    | 0.874 |
| 1449439_at   | Kruppel-like factor 7 (ubiquitous)                                                                        | Klf7          | -1.11 | 0.187 | -1.5  | 0.041 | -1.47 | 0.008 | -1.51 | 0.026 | -1.51 | 0.046 |
| 1455827_at   | muscleblind-like 2                                                                                        | Mbnl2         | 1.45  | 0.445 | -1.01 | 0.501 | -1.47 | 0.012 | -1.27 | 0.001 | -1.63 | 0.019 |
| 1452464_a_at | methionine aminopeptidase-like 1                                                                          | Metap11       | 1.51  | 0.749 | 1.45  | 0.374 | -1.47 | 0.020 | 1.07  | 0.432 | 1.03  | 0.840 |
| 1459665_s_at | MRV integration site 1                                                                                    | Mrv1          | -1.73 | 0.120 | -1.91 | 0.138 | -1.47 | 0.019 | -1.43 | 0.035 | -1.21 | 0.118 |
| 1434189_at   | stromal antigen 1                                                                                         | Stag1         | -1.27 | 0.169 | -2.76 | 0.054 | -1.47 | 0.010 | -1.52 | 0.014 | -2.02 | 0.033 |
| 1436302_at   | RIKEN cDNA 2410193C02 gene                                                                                | 2410193C02Rik | -1.12 | 0.236 | -2.26 | 0.003 | -1.46 | 0.015 | -1.52 | 0.001 | -1.72 | 0.010 |
| 1429556_at   | RIKEN cDNA 2610024B07 gene                                                                                | 2610024B07Rik | -1.01 | 0.892 | -1.47 | 0.030 | -1.46 | 0.030 | -1.52 | 0.052 | -1.71 | 0.012 |
| 1449588_at   | ATP-binding cassette, sub-family A (ABC1), member 4                                                       | Abca4         | -1.01 | 0.691 | -1.02 | 0.695 | -1.46 | 0.021 | 1.68  | 0.744 | 2.1   | 0.381 |
| 1457081_at   | RIKEN cDNA D630038D15 gene                                                                                | D630038D15Rik | -1.11 | 0.533 | -1.24 | 0.257 | -1.46 | 0.016 | -1.23 | 0.313 | -1.37 | 0.112 |
| 1429381_x_at | immunoglobulin heavy chain (J558 family) /// similar to immunoglobulin heavy chain (J558 family) /// LOC2 | Igh-JV558     | 1.12  | 0.944 | -1.25 | 0.350 | -1.46 | 0.036 | 1.43  | 0.216 | 2.32  | 0.011 |
| 1423614_at   | leucine rich repeat containing 8 family, member C                                                         | Lrrc8c        | 4.86  | 0.458 | 3.14  | 0.758 | -1.46 | 0.033 | -1.41 | 0.012 | -1.37 | 0.041 |
| 1449156_at   | lymphocyte antigen 9                                                                                      | Ly9           | 1.03  | 0.953 | -1.01 | 0.824 | -1.46 | 0.041 | 1.11  | 0.590 | 1.03  | 0.974 |
| 1437318_at   | p21 (CDKN1A)-activated kinase 3                                                                           | Pak3          | -1.1  | 0.414 | -3.06 | 0.036 | -1.46 | 0.017 | -1.68 | 0.009 | -2.02 | 0.064 |
| 1437181_at   | pellino 2                                                                                                 | Peli2         | -1.11 | 0.129 | -2.09 | 0.005 | -1.46 | 0.002 | -1.59 | 0.002 | -1.7  | 0.006 |
| 1416354_at   | RNA binding motif protein, X chromosome                                                                   | Rbmx          | 1.17  | 0.437 | -1.36 | 0.076 | -1.46 | 0.024 | -1.12 | 0.343 | 1.03  | 0.872 |
| 1438665_at   | sphingomyelin phosphodiesterase 3, neutral                                                                | Smpd3         | -1.2  | 0.513 | 1.24  | 0.692 | -1.46 | 0.036 | 1.65  | 0.222 | 1.2   | 0.031 |
| 1449201_at   | steroidogenic acute regulatory protein                                                                    | Star          | -1.42 | 0.175 | -1.01 | 0.635 | -1.46 | 0.038 | -1.23 | 0.390 | 1.16  | 0.610 |
| 1429111_at   | tal1 2 /// similar to talin 2                                                                             | Tin2          | -1.2  | 0.033 | -1.68 | 0.002 | -1.46 | 0.005 | -1.41 | 0.006 | -1.5  | 0.005 |
| 1427456_at   | WD repeat and FYVE domain containing 3                                                                    | Wdfy3         | 1.02  | 0.966 | -1.46 | 0.071 | -1.46 | 0.040 | -1.53 | 0.016 | -2.07 | 0.041 |
| 1419791_at   | zinc fingers and homeoboxes 3                                                                             | Zhx3          | 1.25  | 0.318 | 1.32  | 0.351 | -1.46 | 0.044 | 1.18  | 0.853 | -1.18 | 0.495 |
| 1458452_at   | ankyrin repeat domain 11                                                                                  | Ankrd11       | -1.08 | 0.604 | -1.59 | 0.081 | -1.45 | 0.022 | -1.22 | 0.261 | -2.25 | 0.012 |
| 1454015_a_at | cadherin 13                                                                                               | Cdh13         | 1.58  | 0.789 | 1.73  | 0.713 | -1.45 | 0.024 | 1.93  | 0.668 | -1.16 | 0.281 |
| 1428579_at   | formin-like 2                                                                                             | Fmnl2         | 1.26  | 0.449 | -2.45 | 0.034 | -1.45 | 0.031 | -1.49 | 0.007 | -1.81 | 0.018 |
| 1426633_s_at | potassium channel tetramerisation domain containing 14                                                    | Kctd14        | -1.06 | 0.457 | 1.67  | 0.890 | -1.45 | 0.033 | 1.25  | 0.672 | -1.01 | 0.475 |
| 1434627_at   | Nuclear respiratory factor 1                                                                              | Nrf1          | -1.04 | 0.581 | 1.29  | 0.230 | -1.45 | 0.018 | -1.24 | 0.116 | -1.26 | 0.089 |
| 1439034_at   | sialophorin                                                                                               | Spn           | 1.01  | 0.592 | 1.17  | 0.722 | -1.45 | 0.031 | 1.18  | 0.018 | 1.07  | 0.992 |
| 1435700_at   | tal1 2                                                                                                    | Tin2          | -1.04 | 0.562 | -1.59 | 0.092 | -1.45 | 0.017 | -1.38 | 0.086 | -1.6  | 0.024 |
| 1456029_a_at | tetratricopeptide repeat domain 7B                                                                        | Ttc7b         | 1.22  | 0.581 | -1.22 | 0.157 | -1.45 | 0.037 | -1.29 | 0.052 | -1.38 | 0.069 |
| 1444638_at   | titin                                                                                                     | Tin           | 1.04  | 0.592 | 1.42  | 0.865 | -1.45 | 0.047 | -1.33 | 0.237 | -1.14 | 0.466 |
| 1422107_at   | RIKEN cDNA 2410066E13 gene                                                                                | 2410066E13Rik | 1.01  | 0.737 | 1.12  | 0.865 | -1.44 | 0.032 | -1.21 | 0.272 | 1.2   | 0.786 |
| 1431672_at   | RIKEN cDNA 9430069I07 gene                                                                                | 9430069I07Rik | 1.38  | 0.929 | 2.48  | 0.931 | -1.44 | 0.034 | 2.63  | 0.494 | 1.79  | 0.997 |
| 1445701_at   | ATPase, Ca++ transporting, plasma membrane 4                                                              | Atp2b4        | 1.1   | 0.458 | 1.35  | 0.557 | -1.44 | 0.024 | -1.07 | 0.595 | 1.13  | 0.828 |
| 1460439_at   | cDNA sequence BC033915                                                                                    | BC033915      | -1.07 | 0.605 | -1.95 | 0.001 | -1.44 | 0.017 | -1.34 | 0.010 | -1.49 | 0.044 |
| 1435428_at   | cDNA sequence BC037112                                                                                    | BC037112      | 1     | 0.858 | 1.16  | 0.659 | -1.44 | 0.037 | -1.11 | 0.413 | -1.33 | 0.022 |
| 1442695_at   | RIKEN cDNA C030007I01 gene                                                                                | C030007I01Rik | -2.74 | 0.059 | -1.64 | 0.080 | -1.44 | 0.039 | 1.86  | 0.773 | -1.14 | 0.520 |
| 1423222_at   | CAP, adenylate cyclase-associated protein, 2 (yeast)                                                      | Cap2          | -1.2  | 0.187 | -1.38 | 0.118 | -1.44 | 0.037 | -1.14 | 0.188 | -1.34 | 0.102 |
| 1434705_at   | C-terminal binding protein 2 /// zinc finger, RAN-binding domain containing 1                             | Ctbp2         | 1.12  | 0.159 | -1.13 | 0.339 | -1.44 | 0.006 | -1.68 | 0.000 | -1.43 | 0.005 |
| 1425315_at   | dedicator of cytokinesis 7                                                                                | Dock7         | 1.37  | 0.783 | -1.15 | 0.410 | -1.44 | 0.027 | 1.1   | 0.831 | -2.01 | 0.038 |
| 1435888_at   | epidermal growth factor receptor                                                                          | Egfr          | -1.14 | 0.236 | -1.8  | 0.024 | -1.44 | 0.025 | -1.68 | 0.006 | -1.68 | 0.015 |
| 1422686_s_at | exocyst complex component 4                                                                               | Exoc4         | -1.31 | 0.135 | -1.62 | 0.082 | -1.44 | 0.011 | -1.35 | 0.006 | -1.37 | 0.039 |
| 1453317_a_at | KH domain containing, RNA binding, signal transduction associated                                         | Khdrbs3       | -1.12 | 0.055 | -1.73 | 0.007 | -1.44 | 0.002 | -1.28 | 0.011 | -1.45 | 0.000 |
| 1445723_at   | phospholipase C-like 1                                                                                    | Plcl1         | -1.11 | 0.488 | -2.54 | 0.052 | -1.44 | 0.035 | -1.41 | 0.169 | -1.11 | 0.381 |
| 1441202_at   | RAB GTPase activating protein 1-like                                                                      | Rabgap11      | 1.44  | 0.965 | 1.12  | 0.870 | -1.44 | 0.010 | 1.01  | 0.513 | 2.93  | 0.421 |
| 1417401_at   | retinoic acid induced 14                                                                                  | Rai14         | 1.34  | 0.362 | -1.08 | 0.349 | -1.44 | 0.028 | -1.19 | 0.179 | -1.33 | 0.047 |
| 1424704_at   | runt related transcription factor 2                                                                       | Runx2         | -1.11 | 0.370 | -1.67 | 0.017 | -1.44 | 0.001 | -1.67 | 0.007 | -1.65 | 0.016 |
| 1429591_at   | transforming, acidic coiled-coil containing protein 1                                                     | Tacc1         | 2.23  | 0.598 | 1.96  | 0.993 | -1.44 | 0.041 | 1.01  | 0.818 | 1.15  | 0.776 |
| 1457342_at   | zinc finger protein, subfamily 1A, 4 (Eos)                                                                | Zfpn1a4       | -1.23 | 0.254 | -2.18 | 0.057 | -1.44 | 0.025 | -1.19 | 0.448 | -1.17 | 0.501 |
| 1432536_at   | RIKEN cDNA 1700055M20 gene                                                                                | 1700055M20Rik | 1.06  | 0.737 | 1.12  | 0.870 | -1.43 | 0.024 | -1.15 | 0.395 | -1.01 | 0.886 |
| 1445363_at   | RIKEN cDNA 2810055G20 gene                                                                                | 2810055G20Rik | 2.14  | 0.180 | 1.54  | 0.387 | -1.43 | 0.013 | -1.47 | 0.171 | -1.25 | 0.433 |

|              |                                                                                          |               |       |       |       |       |       |       |       |       |       |       |
|--------------|------------------------------------------------------------------------------------------|---------------|-------|-------|-------|-------|-------|-------|-------|-------|-------|-------|
| 1433114_at   | RIKEN cDNA 4921504P20 gene                                                               | 4921504P20Rik | 1.61  | 0.710 | -1.56 | 0.145 | -1.43 | 0.027 | 1.28  | 0.992 | 1.86  | 0.128 |
| 1446632_at   | Calcium channel, voltage-dependent, beta 2 subunit                                       | Caacb2        | -2.34 | 0.097 | 1.03  | 0.290 | -1.43 | 0.043 | 1.01  | 0.909 | 1.21  | 0.514 |
| 1455164_at   | Cdc42 GTPase-activating protein                                                          | Cdgap         | 1.07  | 0.324 | -1.29 | 0.083 | -1.43 | 0.014 | -1.37 | 0.001 | -1.61 | 0.001 |
| 1433731_at   | insulin-like growth factor 2 mRNA binding protein 3                                      | Igf2bp3       | -1.3  | 0.181 | -1.42 | 0.118 | -1.43 | 0.006 | -1.27 | 0.042 | -1    | 0.963 |
| 1453576_at   | Nipped-B homolog (Drosophila)                                                            | Nipbl         | -1.14 | 0.425 | -1.55 | 0.287 | -1.43 | 0.009 | -1.37 | 0.010 | -1.35 | 0.108 |
| 1435970_at   | nemo like kinase                                                                         | Nlk           | -1.15 | 0.193 | -1.51 | 0.017 | -1.43 | 0.016 | -1.49 | 0.009 | -1.56 | 0.010 |
| 1431352_s_at | plasmacytoma variant translocation 1                                                     | Pvt1          | 1.44  | 0.266 | 1.06  | 0.904 | -1.43 | 0.005 | -1.45 | 0.004 | -1.61 | 0.012 |
| 1449292_at   | RB1-inducible coiled-coil 1                                                              | Rb1cc1        | -1.16 | 0.389 | -1.19 | 0.272 | -1.43 | 0.032 | -1.23 | 0.160 | -1.23 | 0.024 |
| 1419550_a_at | serine/threonine kinase 39, STE20/SPS1 homolog (yeast)                                   | Stk39         | -1.1  | 0.297 | -1.94 | 0.015 | -1.43 | 0.034 | -1.44 | 0.003 | -1.6  | 0.014 |
| 1434869_at   | tudor domain containing 3                                                                | Tdrd3         | -1.24 | 0.353 | -1.66 | 0.202 | -1.43 | 0.006 | -1.41 | 0.197 | -1.35 | 0.053 |
| 1424358_at   | ubiquitin-conjugating enzyme E2E 2 (UBC4/5 homolog, yeast)                               | Ube2e2        | -1.34 | 0.163 | -2.76 | 0.034 | -1.43 | 0.014 | -1.63 | 0.000 | -1.7  | 0.001 |
| 1439627_at   | zinc finger protein of the cerebellum 1                                                  | Zic1          | 1.16  | 0.705 | 1.28  | 0.861 | -1.43 | 0.038 | 1.53  | 0.331 | -1.2  | 0.512 |
| 1434967_at   | zinc finger, SWIM domain containing 6                                                    | Zswim6        | 1.03  | 0.057 | -1.13 | 0.247 | -1.43 | 0.015 | -1.67 | 0.006 | -1.73 | 0.001 |
| 1459839_x_at | BTB (POZ) domain containing 11                                                           | Btbd11        | 1.61  | 0.594 | -1.97 | 0.116 | -1.42 | 0.038 | -1.16 | 0.090 | -1.37 | 0.071 |
| 1456257_at   | RIKEN cDNA C130065N10 gene                                                               | C130065N10Rik | 1.14  | 0.362 | 1.12  | 0.661 | -1.42 | 0.031 | -1.06 | 0.299 | -1.4  | 0.034 |
| 1424770_at   | caldesmon 1                                                                              | Cald1         | -1.18 | 0.327 | -1.51 | 0.043 | -1.42 | 0.036 | -1.15 | 0.077 | -1.31 | 0.001 |
| 1431618_a_at | DNA segment, Chr 14, ERATO Doi 581, expressed                                            | D14Erttd581e  | 4.82  | 0.443 | 3.57  | 0.925 | -1.42 | 0.009 | -1.24 | 0.037 | -1.67 | 0.107 |
| 1456145_at   | deleted in lymphocytic leukemia, 2                                                       | Dleu2         | -1.02 | 0.610 | -1.15 | 0.448 | -1.42 | 0.042 | 1.14  | 0.492 | 1.12  | 0.829 |
| 1430532_at   | dymeclin                                                                                 | Dym           | 1.2   | 0.669 | 1.53  | 0.622 | -1.42 | 0.039 | 1.37  | 0.950 | -1.2  | 0.343 |
| 1418285_at   | ephrin B1                                                                                | Efnb1         | -1.33 | 0.061 | -1.5  | 0.010 | -1.42 | 0.019 | -1.28 | 0.002 | -1.11 | 0.115 |
| 1459749_s_at | FAT tumor suppressor homolog 4 (Drosophila)                                              | Fat4          | -1.29 | 0.307 | -3.53 | 0.094 | -1.42 | 0.024 | -1.82 | 0.001 | -1.35 | 0.087 |
| 1446794_at   | G protein-coupled receptor 176                                                           | Gpr176        | 1.18  | 0.869 | -1.39 | 0.243 | -1.42 | 0.034 | 1.62  | 0.681 | 1.02  | 0.874 |
| 1436685_at   | hypothetical LOC544888                                                                   | LOC544888     | -1.33 | 0.169 | 1.07  | 0.729 | -1.42 | 0.043 | 1.63  | 0.433 | 1.88  | 0.017 |
| 1457632_s_at | myeloid ecotropic viral integration site-related gene 1                                  | Mrg1          | -1.46 | 0.281 | -3.35 | 0.131 | -1.42 | 0.028 | -1.99 | 0.015 | -1.54 | 0.006 |
| 1441055_at   | paralemmin 2                                                                             | Palm2         | -1.3  | 0.362 | -1.73 | 0.295 | -1.42 | 0.015 | -1.89 | 0.010 | -1.87 | 0.004 |
| 1417626_at   | phosphodiesterase 4D interacting protein (myomegalin)                                    | Pde4dip       | -1.02 | 0.713 | -1.72 | 0.005 | -1.42 | 0.003 | -1.48 | 0.000 | -1.6  | 0.007 |
| 1416626_at   | phospholipase A2, group IB, pancreas                                                     | Pla2g1b       | 1.09  | 0.967 | 1.59  | 0.311 | -1.42 | 0.025 | 1.2   | 0.687 | 1.24  | 0.347 |
| 1437735_at   | protein phosphatase 1, regulatory (inhibitor) subunit 12A                                | Ppp1r12a      | -1.16 | 0.388 | -1.53 | 0.127 | -1.42 | 0.038 | -1.69 | 0.015 | -1.68 | 0.006 |
| 1434406_at   | SLIT-ROBO Rho GTPase activating protein 2                                                | Srgap2        | -1.24 | 0.295 | -2.21 | 0.074 | -1.42 | 0.003 | -1.78 | 0.001 | -1.67 | 0.008 |
| 1449815_a_at | single-stranded DNA binding protein 2                                                    | Ssbp2         | -1.2  | 0.017 | -2.62 | 0.010 | -1.42 | 0.033 | -1.2  | 0.086 | -1.4  | 0.001 |
| 1418513_at   | serine/threonine kinase 3 (Ste20, yeast homolog)                                         | Stk3          | 6.86  | 0.489 | 3.77  | 0.372 | -1.42 | 0.029 | -1.11 | 0.011 | -1.58 | 0.051 |
| 1434149_at   | transcription factor 4                                                                   | Tcf4          | 1.19  | 0.836 | -1.54 | 0.066 | -1.42 | 0.030 | -1.51 | 0.040 | -1.37 | 0.058 |
| 1444453_at   | Trp53 regulating kinase                                                                  | Trp53rk       | -1.26 | 0.424 | -1.29 | 0.145 | -1.42 | 0.032 | 2.48  | 0.031 | 1.37  | 0.838 |
| 1416487_a_at | yes-associated protein 1                                                                 | Yap1          | 1.29  | 0.502 | 1.03  | 0.746 | -1.42 | 0.009 | -1.26 | 0.028 | -1.39 | 0.035 |
| 1447705_at   | RIKEN cDNA 4833432M17 gene                                                               | 4833432M17Rik | -1.73 | 0.092 | -1.08 | 0.711 | -1.41 | 0.025 | 1.44  | 0.630 | -1.02 | 0.806 |
| 1430789_at   | RIKEN cDNA 4930452B06 gene                                                               | 4930452B06Rik | 1.15  | 0.736 | 1.14  | 0.719 | -1.41 | 0.049 | 1.78  | 0.324 | 1.01  | 0.822 |
| 1418403_at   | a disintegrin and metallopeptidase domain 19 (meltrin beta)                              | Adam19        | 6.69  | 0.600 | 3.65  | 0.560 | -1.41 | 0.006 | -1.28 | 0.023 | -1.54 | 0.010 |
| 1425223_at   | baculoviral IAP repeat-containing 3                                                      | Birc3         | 1.5   | 0.973 | -1.11 | 0.488 | -1.41 | 0.029 | 1.29  | 0.932 | -1.01 | 0.483 |
| 1427692_a_at | calcium/calmodulin-dependent serine protein kinase (MAGUK family)                        | Cask          | 2.84  | 0.743 | 1.5   | 0.203 | -1.41 | 0.021 | -1.35 | 0.045 | -1.65 | 0.090 |
| 1455082_at   | Casitas B-lineage lymphoma b                                                             | Cblb          | -1.07 | 0.213 | -1.69 | 0.007 | -1.41 | 0.018 | -1.48 | 0.044 | -1.97 | 0.041 |
| 1450229_at   | cofactor required for Sp1 transcriptional activation, subunit 2                          | Crsp2         | 1.22  | 0.193 | -1.12 | 0.347 | -1.41 | 0.015 | 1.03  | 0.939 | 1.21  | 0.824 |
| 1449339_at   | DNA segment, Chr 10, ERATO Doi 641, expressed                                            | D10Erttd641e  | -1.03 | 0.657 | 1.07  | 0.792 | -1.41 | 0.001 | 1     | 0.886 | -1.04 | 0.666 |
| 1429064_at   | DIP2 disco-interacting protein 2 homolog C (Drosophila)                                  | Dip2c         | -1.44 | 0.104 | -3.12 | 0.032 | -1.41 | 0.002 | -1.55 | 0.004 | -1.99 | 0.008 |
| 1419293_at   | Down syndrome cell adhesion molecule                                                     | Dscam         | -1.3  | 0.188 | 1.17  | 0.575 | -1.41 | 0.040 | -1.22 | 0.322 | 1.77  | 0.780 |
| 1418242_at   | Fas-associated factor 1                                                                  | Faf1          | -1.27 | 0.202 | -2.28 | 0.058 | -1.41 | 0.002 | -1.44 | 0.007 | -1.69 | 0.002 |
| 1454958_at   | glycogen synthase kinase 3 beta                                                          | Gsk3b         | 1.33  | 0.417 | -1.09 | 0.447 | -1.41 | 0.025 | -1.62 | 0.001 | -1.72 | 0.001 |
| 1454693_at   | Histone deacetylase 4                                                                    | Hdac4         | 1.19  | 0.393 | -1.21 | 0.069 | -1.41 | 0.049 | -1.46 | 0.023 | -1.77 | 0.053 |
| 1441642_at   | Like-glycosyltransferase                                                                 | Large         | 1.3   | 0.423 | 1.07  | 0.734 | -1.41 | 0.041 | -1.48 | 0.215 | -1.58 | 0.163 |
| 1444625_at   | Hypothetical LOC545822                                                                   | LOC545822     | -1.81 | 0.118 | 1.09  | 0.852 | -1.41 | 0.031 | 2.5   | 0.665 | 2.24  | 0.298 |
| 1452320_at   | low density lipoprotein receptor-related protein 2                                       | Lrp2          | -1.27 | 0.022 | -1.36 | 0.144 | -1.41 | 0.027 | -1.31 | 0.000 | -1.13 | 0.148 |
| 1426759_at   | mitogen-activated protein kinase kinase kinase kinase 3 /// similar to Map4k3 /// LOC675 |               | 1.12  | 0.152 | -1.2  | 0.049 | -1.41 | 0.047 | -1.51 | 0.007 | -1.69 | 0.001 |
| 1452209_at   | plakophilin 4                                                                            | Pkp4          | -1.24 | 0.238 | -2.01 | 0.027 | -1.41 | 0.009 | -1.6  | 0.000 | -1.6  | 0.004 |
| 1446507_at   | Prion protein                                                                            | Prnp          | 1.57  | 0.187 | 2.24  | 0.183 | -1.41 | 0.026 | 1.43  | 0.272 | 1.24  | 0.132 |
| 1426023_a_at | rabaptin, RAB GTPase binding effector protein 1                                          | Rabep1        | 1.69  | 0.976 | 1.84  | 0.242 | -1.41 | 0.037 | -1.08 | 0.408 | -1.19 | 0.262 |
| 1453631_at   | syntaxin 8                                                                               | Stx8          | -1.19 | 0.085 | 1.13  | 0.567 | -1.41 | 0.034 | -1.78 | 0.025 | -1.27 | 0.299 |
| 1457571_at   | zinc finger protein 68                                                                   | Zfp68         | 1.77  | 0.481 | 1.42  | 0.233 | -1.41 | 0.027 | 1.48  | 0.344 | -1.14 | 0.299 |
| 1439922_at   | RIKEN cDNA 1190002C06 gene                                                               | 1190002C06Rik | -1.11 | 0.594 | -1.91 | 0.046 | -1.4  | 0.025 | -1.26 | 0.296 | -1.46 | 0.067 |
| 1428493_at   | RIKEN cDNA 2610511M17 gene /// similar to signal-induced prolifer:2610511M17Rik ///      |               | -1.17 | 0.275 | -1.74 | 0.005 | -1.4  | 0.047 | -1.8  | 0.005 | -1.63 | 0.000 |

|              |                                                                        |               |       |       |       |       |       |       |       |       |       |       |
|--------------|------------------------------------------------------------------------|---------------|-------|-------|-------|-------|-------|-------|-------|-------|-------|-------|
| 1430460_at   | RIKEN cDNA 5830410F13 gene                                             | 5830410F13Rik | -1.08 | 0.501 | 1.25  | 0.768 | -1.4  | 0.042 | 1.22  | 0.600 | -1.8  | 0.164 |
| 1429579_at   | RIKEN cDNA 6330407118 gene                                             | 6330407118Rik | 1.37  | 0.889 | -1.46 | 0.112 | -1.4  | 0.047 | -1.28 | 0.037 | -1.76 | 0.015 |
| 1423199_at   | bromodomain containing 3                                               | Brd3          | -1.06 | 0.492 | 1.06  | 0.738 | -1.4  | 0.015 | 1.12  | 0.219 | -1.04 | 0.535 |
| 1452483_a_at | CD44 antigen                                                           | Cd44          | 1.73  | 0.572 | 1.05  | 0.348 | -1.4  | 0.006 | -1.11 | 0.259 | -1.41 | 0.069 |
| 1439040_at   | centromere protein E                                                   | Cenpe         | -1.19 | 0.477 | -1.41 | 0.227 | -1.4  | 0.022 | -1.25 | 0.203 | -1.01 | 0.803 |
| 1433491_at   | erythrocyte protein band 4.1-like 2                                    | Epb4.1l2      | 22.4  | 0.418 | 14.39 | 0.732 | -1.4  | 0.005 | -1.14 | 0.175 | -1.48 | 0.027 |
| 1434158_at   | GDP-mannose 4, 6-dehydratase                                           | Gmids         | -1.3  | 0.036 | -1.34 | 0.039 | -1.4  | 0.009 | -1.13 | 0.033 | -1.3  | 0.012 |
| 1429796_at   | kallirin, RhoGEF kinase                                                | Kalmn         | -1.29 | 0.066 | -2.17 | 0.001 | -1.4  | 0.047 | -1.71 | 0.016 | -1.54 | 0.003 |
| 1439515_at   | SET domain containing 5                                                | Setd5         | 1.14  | 0.469 | -1.3  | 0.053 | -1.4  | 0.014 | -1.35 | 0.025 | -1.51 | 0.037 |
| 1419503_at   | stanniocalcin 2                                                        | Stc2          | 1.46  | 0.198 | 1.37  | 0.354 | -1.4  | 0.048 | -1.11 | 0.412 | 1.2   | 0.483 |
| 1441842_s_at | zinc finger protein 707                                                | Zfp707        | 1     | 0.921 | 1.31  | 0.227 | -1.4  | 0.000 | 1.25  | 0.271 | 1.55  | 0.010 |
| 1420339_at   | RIKEN cDNA 0610016J10 gene                                             | 0610016J10Rik | -1.04 | 0.706 | -1.54 | 0.003 | -1.39 | 0.006 | -1.18 | 0.024 | -1.49 | 0.010 |
| 1432720_at   | RIKEN cDNA 4833412K13 gene                                             | 4833412K13Rik | 1.27  | 0.113 | 1.06  | 0.911 | -1.39 | 0.031 | -1.07 | 0.553 | 1.23  | 0.392 |
| 1423244_at   | RIKEN cDNA 9030012A22 gene                                             | 9030012A22Rik | -1.29 | 0.139 | -1.52 | 0.167 | -1.39 | 0.017 | 1.1   | 0.599 | -1.05 | 0.763 |
| 1440430_at   | RIKEN cDNA A130004G07 gene                                             | A130004G07Rik | 3.29  | 0.604 | 2.53  | 0.573 | -1.39 | 0.003 | 2.47  | 0.577 | -1.34 | 0.192 |
| 1443870_at   | ATP-binding cassette, sub-family C (CFTR/MRP), member 4                | Abcc4         | -1.38 | 0.031 | -2.43 | 0.034 | -1.39 | 0.004 | -1.25 | 0.012 | -1.34 | 0.049 |
| 1426300_at   | activated leukocyte cell adhesion molecule                             | Alcam         | -1.08 | 0.401 | -1.12 | 0.050 | -1.39 | 0.019 | -1.17 | 0.167 | -1.1  | 0.203 |
| 1447930_at   | bromodomain adjacent to zinc finger domain 1A                          | Baz1a         | 1.07  | 0.137 | 1.12  | 0.233 | -1.39 | 0.035 | -1.07 | 0.032 | -1.2  | 0.020 |
| 1422887_a_at | C-terminal binding protein 2                                           | Ctbp2         | 1.03  | 0.459 | -1.22 | 0.068 | -1.39 | 0.009 | -1.46 | 0.000 | -1.37 | 0.012 |
| 1452220_at   | dedicator of cyto-kinesis 1                                            | Dock1         | -1    | 0.781 | -1.98 | 0.022 | -1.39 | 0.024 | -1.36 | 0.017 | -1.61 | 0.008 |
| 1422018_at   | human immunodeficiency virus type I enhancer binding protein 2         | Hivp2         | 1.23  | 0.748 | -1.12 | 0.303 | -1.39 | 0.018 | -1.44 | 0.025 | -1.92 | 0.000 |
| 1444040_at   | leukocyte-associated Ig-like receptor 1                                | Lair1         | 1.66  | 0.372 | 1.28  | 0.230 | -1.39 | 0.025 | 1.31  | 0.897 | 1.93  | 0.754 |
| 1450437_a_at | neural cell adhesion molecule 1                                        | Ncam1         | 1.76  | 0.774 | 1.54  | 0.358 | -1.39 | 0.041 | -1.12 | 0.296 | -1.18 | 0.249 |
| 1440996_at   | Neural precursor cell expressed, developmentally down-regulated gene 8 | Nedd8         | 2.37  | 0.418 | 2.88  | 0.429 | -1.39 | 0.050 | 1.2   | 0.296 | 1.27  | 0.275 |
| 1423117_at   | pumilio 1 (Drosophila)                                                 | Pum1          | 1.49  | 0.629 | 1.73  | 0.371 | -1.39 | 0.009 | -1.36 | 0.011 | -1.2  | 0.107 |
| 1452136_at   | solute carrier family 5 (sodium/glucose cotransporter), member 9       | Slc5a9        | 1.24  | 0.121 | 1.07  | 0.542 | -1.39 | 0.046 | 1     | 0.778 | 1.56  | 0.331 |
| 1453058_at   | WD repeat domain 5B                                                    | Wdr5b         | 4.53  | 0.030 | 2.81  | 0.166 | -1.39 | 0.014 | -1.03 | 0.419 | -1.09 | 0.381 |
| 1441052_at   | RIKEN cDNA 2310035C23 gene                                             | 2310035C23Rik | -1.11 | 0.453 | 1     | 0.684 | -1.38 | 0.013 | 1     | 0.889 | -1.47 | 0.085 |
| 1429595_at   | RIKEN cDNA 2700049A03 gene                                             | 2700049A03Rik | -1.15 | 0.291 | -1.54 | 0.174 | -1.38 | 0.049 | -1.03 | 0.658 | -1.1  | 0.128 |
| 1430407_at   | RIKEN cDNA 3110035C09 gene                                             | 3110035C09Rik | 1.2   | 0.767 | 1.04  | 0.596 | -1.38 | 0.039 | -1.46 | 0.028 | -1.27 | 0.204 |
| 1451568_at   | RIKEN cDNA A630054L15 gene                                             | A630054L15Rik | -1.23 | 0.296 | -1.53 | 0.064 | -1.38 | 0.034 | 1.03  | 0.988 | 1.4   | 0.025 |
| 1421172_at   | a disintegrin and metalloproteinase domain 12 (meltrin alpha)          | Adam12        | 1.01  | 0.686 | -1.48 | 0.109 | -1.38 | 0.024 | -1.23 | 0.050 | -1.53 | 0.001 |
| 1425099_a_at | aryl hydrocarbon receptor nuclear translocator-like                    | Arntl         | -1.08 | 0.412 | -1.56 | 0.015 | -1.38 | 0.020 | -1.43 | 0.010 | -1.77 | 0.007 |
| 1435600_s_at | cDNA sequence BC020535                                                 | BC020535      | 1.71  | 0.004 | 1.29  | 0.730 | -1.38 | 0.017 | 1.69  | 0.332 | -1.45 | 0.092 |
| 1443986_at   | Vcell division cycle 73, Paf1/RNA polymerase II complex component      | Cdc73         | 1.41  | 0.545 | 1.16  | 0.708 | -1.38 | 0.035 | -1.11 | 0.300 | -1.61 | 0.003 |
| 1458534_at   | DNA segment, Chr 13, Brigham & Women's Genetics 1146 expressed         | D13Bwg1146e   | 1.26  | 0.923 | 1.42  | 0.603 | -1.38 | 0.038 | 2.56  | 0.071 | -1.22 | 0.339 |
| 1441631_at   | DEAD (Asp-Glu-Ala-Asp) box polypeptide 24                              | Ddx24         | 2.29  | 0.613 | 4.56  | 0.453 | -1.38 | 0.039 | -1.03 | 0.674 | 1.21  | 0.747 |
| 1453372_at   | DnaJ (Hsp40) homolog, subfamily C, member 1                            | Dnajc1        | 1.05  | 0.384 | -1.35 | 0.013 | -1.38 | 0.031 | -1.2  | 0.010 | -1.51 | 0.009 |
| 1450616_at   | eosinophil-associated, ribonuclease A family, member 5                 | Ear5          | 1.16  | 0.805 | -1.7  | 0.078 | -1.38 | 0.044 | -1.03 | 0.373 | -1.37 | 0.264 |
| 1437201_at   | leucine rich repeat containing 4C                                      | Lrrc4c        | -1.26 | 0.266 | -3.7  | 0.014 | -1.38 | 0.012 | -1.53 | 0.005 | -1.52 | 0.076 |
| 1426785_s_at | monoglyceride lipase                                                   | Mgll          | -1.12 | 0.164 | -1.47 | 0.063 | -1.38 | 0.024 | -1.17 | 0.028 | -1.23 | 0.054 |
| 1432591_at   | pregnancy-associated plasma protein A                                  | Pappa         | -1.06 | 0.413 | -1.73 | 0.010 | -1.38 | 0.021 | -1.29 | 0.013 | -1.61 | 0.003 |
| 1450406_a_at | ST3 beta-galactoside alpha-2,3-sialyltransferase 3                     | St3gal3       | 1.09  | 0.508 | -1.3  | 0.082 | -1.38 | 0.012 | -1.25 | 0.021 | -1.26 | 0.094 |
| 1436499_at   | transmembrane protein 23                                               | Tmem23        | -1.08 | 0.076 | -1.53 | 0.023 | -1.38 | 0.024 | -1.61 | 0.001 | -1.55 | 0.030 |
| 1437155_a_at | VW domain containing transcription regulator 1                         | Wwtr1         | -1.05 | 0.470 | -1.46 | 0.005 | -1.38 | 0.007 | -1.35 | 0.023 | -1.25 | 0.001 |
| 1417848_at   | zinc finger protein 704                                                | Zfp704        | -1.37 | 0.262 | -3.26 | 0.102 | -1.38 | 0.003 | -1.36 | 0.109 | -1.48 | 0.005 |
| 1441867_x_at | RIKEN cDNA 4930534B04 gene                                             | 4930534B04Rik | -1.4  | 0.272 | -2.05 | 0.048 | -1.37 | 0.029 | -1.26 | 0.164 | -1.18 | 0.166 |
| 1427980_at   | RIKEN cDNA 4933407C03 gene                                             | 4933407C03Rik | 1.3   | 0.240 | -1.06 | 0.740 | -1.37 | 0.002 | -1.44 | 0.019 | -1.4  | 0.001 |
| 1456011_x_at | acetyl-Coenzyme A acyltransferase 1A                                   | Acaa1a        | -1.19 | 0.412 | 1.02  | 0.514 | -1.37 | 0.038 | 1.31  | 0.140 | 1.16  | 0.101 |
| 1456021_at   | activating transcription factor 6                                      | Atf6          | 1.15  | 0.680 | -1.5  | 0.046 | -1.37 | 0.013 | -1.28 | 0.133 | -1.79 | 0.005 |
| 1449244_at   | cadherin 2                                                             | Cdh2          | 1     | 0.807 | -1.33 | 0.020 | -1.37 | 0.040 | -1.18 | 0.146 | -1.5  | 0.002 |
| 1452570_at   | DNA segment, KIST 5                                                    | D0Kist5       | 1.3   | 0.671 | 1.31  | 0.914 | -1.37 | 0.046 | -1.08 | 0.838 | 1.23  | 0.863 |
| 1455244_at   | dishevelled associated activator of morphogenesis 1                    | Daam1         | 1.25  | 0.378 | -1.32 | 0.171 | -1.37 | 0.015 | -1.65 | 0.002 | -1.65 | 0.000 |
| 1424586_at   | EH domain binding protein 1                                            | Ehbp1         | -1.19 | 0.028 | -2.61 | 0.004 | -1.37 | 0.008 | -1.44 | 0.014 | -1.71 | 0.031 |
| 1429034_at   | essential meiotic endonuclease 1 homolog 2 (S. pombe)                  | Eme2          | -1.46 | 0.258 | -1.72 | 0.230 | -1.37 | 0.007 | -1.21 | 0.171 | 1.36  | 0.501 |
| 1419829_a_at | Growth factor receptor bound protein 2-associated protein 2            | Gab2          | -1.33 | 0.264 | -2.42 | 0.071 | -1.37 | 0.022 | -2.03 | 0.003 | -1.69 | 0.007 |
| 1422154_at   | G protein-coupled receptor 27                                          | Gpr27         | -1.06 | 0.561 | -1.26 | 0.114 | -1.37 | 0.028 | 1.52  | 0.358 | 1     | 0.986 |
| 1455078_at   | Heat shock protein 90kDa alpha (cytosolic), class A member 1           | Hsp90aa1      | 1.04  | 0.800 | -1.61 | 0.011 | -1.37 | 0.008 | -1.54 | 0.017 | -1.38 | 0.016 |

|              |                                                                      |                    |       |       |       |       |       |       |       |       |       |       |
|--------------|----------------------------------------------------------------------|--------------------|-------|-------|-------|-------|-------|-------|-------|-------|-------|-------|
| 1451804_a_at | leucine rich repeat containing 16                                    | Lrrc16             | 1     | 0.759 | -3.49 | 0.004 | -1.37 | 0.018 | -1.96 | 0.005 | -1.71 | 0.014 |
| 1435461_at   | membrane associated guanylate kinase, WW and PDZ domain cont:        | Magi3              | -1.16 | 0.207 | -3.3  | 0.018 | -1.37 | 0.020 | -1.46 | 0.094 | -1.68 | 0.004 |
| 1435233_at   | nuclear receptor coactivator 2                                       | Ncoa2              | -1.03 | 0.632 | -2.98 | 0.003 | -1.37 | 0.006 | -1.79 | 0.001 | -1.46 | 0.025 |
| 1459707_at   | Phosphofurin acidic cluster sorting protein 1                        | Pacs1              | -1.19 | 0.394 | -1.51 | 0.296 | -1.37 | 0.034 | -1.21 | 0.360 | 1.11  | 0.880 |
| 1454900_s_at | pam, highwire, rpm 1                                                 | Phr1               | -1.13 | 0.417 | -1.97 | 0.055 | -1.37 | 0.024 | -1.64 | 0.005 | -1.78 | 0.026 |
| 1460732_a_at | periplakin                                                           | Ppl                | 1.29  | 0.828 | -1.32 | 0.250 | -1.37 | 0.015 | 1.13  | 0.432 | 1.83  | 0.252 |
| 1434005_at   | RNA binding motif, single stranded interacting protein 1             | Rbms1              | -1.01 | 0.888 | -1.53 | 0.001 | -1.37 | 0.002 | -1.49 | 0.003 | -1.58 | 0.005 |
| 1427299_at   | ribosomal protein S6 kinase polypeptide 3                            | Rps6ka3            | -1.05 | 0.287 | -1.42 | 0.011 | -1.37 | 0.010 | -1.29 | 0.039 | -1.42 | 0.005 |
| 1454699_at   | sestrin 1                                                            | Sesn1              | 3.14  | 0.412 | 1.84  | 0.500 | -1.37 | 0.033 | 1.22  | 0.404 | -1.06 | 0.537 |
| 1454894_at   | SMAD specific E3 ubiquitin protein ligase 2                          | Smurf2             | 1.12  | 0.422 | -1.07 | 0.536 | -1.37 | 0.000 | -1.49 | 0.004 | -1.44 | 0.002 |
| 1455042_at   | Transducin (beta)-like 1 X-linked                                    | Tbl1x              | 1.36  | 0.550 | -1.02 | 0.467 | -1.37 | 0.007 | -1.38 | 0.003 | -1.56 | 0.006 |
| 1444042_at   | thyroid hormone receptor interactor 11                               | Trip11             | 1.48  | 0.242 | 1.38  | 0.473 | -1.37 | 0.002 | -1.12 | 0.507 | 1.06  | 0.365 |
| 1439129_at   | RIKEN cDNA 1110060D06 gene /// dedicator of cytokinesis 5            | 1110060D06Rik ///  | 1.14  | 0.981 | -1.62 | 0.077 | -1.36 | 0.040 | -1.61 | 0.013 | -1.99 | 0.014 |
| 1454055_at   | RIKEN cDNA 1600029O15 gene                                           | 1600029O15Rik      | 1.94  | 0.367 | 3.18  | 0.002 | -1.36 | 0.026 | -1.67 | 0.123 | 3.02  | 0.062 |
| 1429700_at   | RIKEN cDNA 3110040M04 gene /// similar to U2-associated SR140        | 3110040M04Rik ///  | 1.08  | 0.650 | 1.14  | 0.435 | -1.36 | 0.032 | -1.15 | 0.126 | -1.06 | 0.321 |
| 1430602_at   | RIKEN cDNA 4930520K10 gene                                           | 4930520K10Rik      | -1.23 | 0.358 | -1.01 | 0.630 | -1.36 | 0.011 | 1.96  | 0.380 | 1.23  | 0.192 |
| 1460560_at   | BAH domain and coiled-coil containing 1                              | Bahcc1             | 1.21  | 0.944 | -1.01 | 0.475 | -1.36 | 0.002 | -1.06 | 0.407 | -1.08 | 0.483 |
| 1425123_at   | cDNA sequence BC025816                                               | BC025816           | 1.11  | 0.612 | 1.19  | 0.381 | -1.36 | 0.021 | 1.35  | 0.117 | -1.03 | 0.816 |
| 1423699_at   | DNA segment, Chr 15, ERATO Doi 785, expressed                        | D15Erd785e         | -1.01 | 0.731 | 1.05  | 0.810 | -1.36 | 0.018 | 1.01  | 0.971 | -1.36 | 0.017 |
| 1449223_at   | Dnaj (Hsp40) homolog, subfamily B, member 8                          | Dnajb8             | 2.1   | 0.465 | 1.76  | 0.820 | -1.36 | 0.012 | 1.02  | 0.744 | 2.03  | 0.202 |
| 1455117_at   | minichromosome maintenance deficient domain containing 1             | Mcmdc1             | 1.07  | 0.923 | -1.67 | 0.073 | -1.36 | 0.015 | -1.25 | 0.068 | -1.03 | 0.767 |
| 1459679_s_at | myosin IB                                                            | Myo1b              | -1.1  | 0.068 | -1.83 | 0.019 | -1.36 | 0.018 | -1.31 | 0.202 | -1.86 | 0.076 |
| 1418892_at   | ras homolog gene family, member J                                    | Rhoj               | 1.03  | 0.973 | -1.46 | 0.025 | -1.36 | 0.036 | -1.23 | 0.018 | -1.13 | 0.225 |
| 1459666_at   | trafficking protein, kinesin binding 1                               | Trak1              | -1.26 | 0.096 | -1.4  | 0.005 | -1.36 | 0.020 | -1.22 | 0.046 | -1.4  | 0.044 |
| 1432779_at   | RIKEN cDNA 1700037N05 gene                                           | 1700037N05Rik      | 1.28  | 0.525 | -1.01 | 0.666 | -1.35 | 0.026 | -1.02 | 0.700 | 1.06  | 0.896 |
| 1437216_at   | RIKEN cDNA A430106J12 gene                                           | A430106J12Rik      | 1.11  | 0.222 | -1.3  | 0.181 | -1.35 | 0.021 | -1.32 | 0.037 | -1.7  | 0.043 |
| 1436498_at   | ariadne ubiquitin-conjugating enzyme E2 binding protein homolog 1    | Arih1              | 1.44  | 0.410 | 1.05  | 0.737 | -1.35 | 0.007 | -1.2  | 0.046 | -1.51 | 0.018 |
| 1432900_at   | cDNA sequence BC026657                                               | BC026657           | -1.2  | 0.291 | -1.35 | 0.202 | -1.35 | 0.049 | -1.3  | 0.257 | 1.37  | 0.143 |
| 1435903_at   | CD300A antigen                                                       | Cd300a             | 2.92  | 0.641 | 2.67  | 1.000 | -1.35 | 0.048 | 1.21  | 0.138 | 1.48  | 0.423 |
| 1438255_at   | checkpoint suppressor 1                                              | Ches1              | -1    | 0.861 | -1.7  | 0.014 | -1.35 | 0.012 | -1.5  | 0.039 | -1.3  | 0.060 |
| 1439090_at   | RIKEN cDNA D030022P07 gene                                           | D030022P07Rik      | -1.22 | 0.122 | -1.2  | 0.107 | -1.35 | 0.004 | -1.14 | 0.518 | -1    | 0.592 |
| 1447631_at   | MYST histone acetyltransferase 2                                     | Myst2              | -1.36 | 0.201 | -1.84 | 0.111 | -1.35 | 0.012 | -1.07 | 0.357 | 1.63  | 0.075 |
| 1416818_at   | parvin, alpha                                                        | Parva              | 1.97  | 0.421 | 1.61  | 0.661 | -1.35 | 0.015 | -1.04 | 0.380 | -1.19 | 0.091 |
| 1449320_at   | probasin                                                             | Pbsn               | -1.04 | 0.498 | -1.17 | 0.453 | -1.35 | 0.024 | 1.26  | 0.846 | 1.31  | 0.876 |
| 1459903_at   | sema domain, immunoglobulin domain (Ig), and GPI membrane anc        | Sema7a             | -1.21 | 0.128 | -1.85 | 0.049 | -1.35 | 0.013 | -1.38 | 0.018 | -1.41 | 0.005 |
| 1457528_at   | solute carrier family 4, sodium bicarbonate cotransporter, member 7  | Slc4a7             | 1.83  | 0.132 | 1.74  | 0.277 | -1.35 | 0.003 | 1.08  | 0.173 | -1.28 | 0.154 |
| 1421215_a_at | sarcolemma associated protein                                        | Slmap              | 1.81  | 0.852 | 1.28  | 0.869 | -1.35 | 0.017 | -1.04 | 0.450 | -1.07 | 0.398 |
| 1448639_a_at | spermatogenesis associated 5                                         | Spata5             | -1.23 | 0.262 | -1.19 | 0.268 | -1.35 | 0.013 | -1.46 | 0.005 | -1.58 | 0.001 |
| 1456634_at   | RIKEN cDNA 9830001H06 gene                                           | 9830001H06Rik      | 1.22  | 0.912 | 1.28  | 0.954 | -1.34 | 0.012 | -1.32 | 0.042 | -1.04 | 0.704 |
| 1437124_at   | RIKEN cDNA A630052C17 gene                                           | A630052C17Rik      | -1.06 | 0.190 | -1.07 | 0.414 | -1.34 | 0.027 | -1.19 | 0.070 | 1.12  | 0.561 |
| 1435769_at   | A kinase (PRKA) anchor protein (yotiao) 9                            | Akap9              | -1.03 | 0.630 | -1.71 | 0.022 | -1.34 | 0.031 | -1.31 | 0.030 | -1.34 | 0.036 |
| 1429600_at   | RIKEN cDNA C630010D07 gene /// similar to methylenetetrahydrofo      | C630010D07Rik ///  | 1.8   | 0.037 | 1.4   | 0.578 | -1.34 | 0.001 | -1.12 | 0.351 | -1.17 | 0.188 |
| 1420380_at   | chemokine (C-C motif) ligand 2                                       | Ccl2               | 1.21  | 0.920 | 1.13  | 0.461 | -1.34 | 0.021 | -1.14 | 0.131 | -1.56 | 0.019 |
| 1439727_at   | chloride channel calcium activated 6 /// expressed sequence A17474   | Clca6 /// A1747448 | 1.15  | 0.873 | 1.34  | 0.627 | -1.34 | 0.017 | -1.06 | 0.655 | 1.31  | 0.089 |
| 1434112_at   | latrophilin 2                                                        | Lphn2              | -1.15 | 0.327 | -1.88 | 0.022 | -1.34 | 0.002 | -1.14 | 0.113 | -1.43 | 0.019 |
| 1444422_at   | protocadherin 19                                                     | Pcdh19             | -1.21 | 0.242 | -1.87 | 0.022 | -1.34 | 0.002 | -1.26 | 0.078 | -1.41 | 0.006 |
| 1453164_a_at | phosphatidylserine synthase 2                                        | Ptdss2             | 1.39  | 0.357 | 1.12  | 0.642 | -1.34 | 0.013 | 1.12  | 0.957 | -1.07 | 0.667 |
| 1448754_at   | retinol binding protein 1, cellular                                  | Rbp1               | -1.08 | 0.489 | 1.11  | 0.183 | -1.34 | 0.001 | -1.04 | 0.692 | 1.27  | 0.702 |
| 1423129_at   | soc-2 (suppressor of clear) homolog (C. elegans)                     | Shoc2              | 1.38  | 0.397 | 1.22  | 0.671 | -1.34 | 0.008 | -1.28 | 0.036 | -1.45 | 0.025 |
| 1423077_at   | sorting nexin 9                                                      | Snx9               | 1.87  | 0.466 | 1.3   | 0.660 | -1.34 | 0.004 | -1.18 | 0.007 | -1.42 | 0.016 |
| 1433648_at   | sperm associated antigen 9                                           | Spag9              | 1.08  | 0.400 | -1.4  | 0.049 | -1.34 | 0.002 | -1.22 | 0.021 | -1.36 | 0.006 |
| 1419073_at   | transmembrane protein with EGF-like and two follistatin-like domains | Tmeff2             | -1.14 | 0.194 | -2.11 | 0.017 | -1.34 | 0.023 | -1.21 | 0.080 | -1.57 | 0.001 |
| 1422705_at   | transmembrane, prostate androgen induced RNA                         | Tmepai             | 1.45  | 0.421 | 1.05  | 0.543 | -1.34 | 0.014 | -1.21 | 0.029 | -1.18 | 0.012 |
| 1420725_at   | trimethyllysine hydroxylase, epsilon                                 | Tmlhe              | -1.44 | 0.230 | -1.59 | 0.167 | -1.34 | 0.013 | -1.43 | 0.069 | -1.04 | 0.695 |
| 1451959_a_at | vascular endothelial growth factor A                                 | Vegfa              | 6.67  | 0.537 | 4.92  | 0.934 | -1.34 | 0.008 | -1.01 | 0.654 | -1.12 | 0.309 |
| 1446789_at   | Zinc finger CCHC-type and RNA binding motif 1                        | Zcrb1              | 1.24  | 0.679 | -1    | 0.589 | -1.34 | 0.005 | -1.02 | 0.524 | -1.6  | 0.084 |
| 1436425_at   | ankyrin repeat domain 38                                             | Ankrd38            | -1.31 | 0.375 | -1.11 | 0.376 | -1.33 | 0.034 | -1.09 | 0.459 | 1.29  | 0.671 |
| 1450915_at   | adaptor-related protein complex 3, beta 1 subunit                    | Ap3b1              | 1.11  | 0.514 | -1.29 | 0.107 | -1.33 | 0.032 | -1.33 | 0.047 | -1.35 | 0.012 |

|              |                                                                         |               |       |       |       |       |       |       |       |       |       |       |
|--------------|-------------------------------------------------------------------------|---------------|-------|-------|-------|-------|-------|-------|-------|-------|-------|-------|
| 1441980_at   | RIKEN cDNA C030007I09 gene                                              | C030007I09Rik | -1.15 | 0.394 | -2.11 | 0.127 | -1.33 | 0.031 | -1.38 | 0.102 | -1.76 | 0.003 |
| 1443417_at   | expressed sequence C87122                                               | C87122        | 1.54  | 0.506 | 1.29  | 0.605 | -1.33 | 0.026 | 1.03  | 0.948 | -1.22 | 0.104 |
| 1451811_at   | calcium channel, voltage-dependent, gamma subunit 6                     | Cacng6        | 1.72  | 0.291 | 1.76  | 0.319 | -1.33 | 0.002 | -1.09 | 0.397 | 1.53  | 0.826 |
| 1450288_at   | cadherin 6                                                              | Cdh6          | 1.08  | 0.578 | -1.36 | 0.155 | -1.33 | 0.007 | -1.12 | 0.201 | -1.77 | 0.083 |
| 1450756_s_at | cullin 3                                                                | Cul3          | 3.04  | 0.568 | 2.14  | 0.912 | -1.33 | 0.021 | -1.28 | 0.010 | -1.55 | 0.000 |
| 1448665_at   | dystrophin, muscular dystrophy                                          | Dmd           | -1.02 | 0.519 | -1.49 | 0.028 | -1.33 | 0.015 | -1.45 | 0.039 | -1.39 | 0.019 |
| 1428933_at   | histone deacetylase 8                                                   | Hdac8         | 1.2   | 0.707 | -1.5  | 0.082 | -1.33 | 0.024 | -1.24 | 0.221 | -1.42 | 0.042 |
| 1418125_at   | INO80 complex homolog 1 (S. cerevisiae)                                 | Inoc1         | -1.12 | 0.462 | -1.27 | 0.298 | -1.33 | 0.010 | -1.52 | 0.007 | -1.17 | 0.162 |
| 1427143_at   | jumonji, AT rich interactive domain 1B (Rbp2 like)                      | Jarid1b       | -1    | 0.695 | 1.03  | 0.948 | -1.33 | 0.015 | -1.2  | 0.053 | -1.22 | 0.001 |
| 1428644_at   | mannoside acetylglucosaminyltransferase 5                               | Mgat5         | -1.45 | 0.195 | -2.39 | 0.128 | -1.33 | 0.047 | -1.52 | 0.022 | -1.31 | 0.100 |
| 1418391_at   | PHD finger protein 21A                                                  | Phf21a        | -1.02 | 0.647 | -1.51 | 0.104 | -1.33 | 0.043 | -1.49 | 0.052 | -1.75 | 0.018 |
| 1426401_at   | protein phosphatase 3, catalytic subunit, alpha isoform                 | Ppp3ca        | -1.14 | 0.031 | -2.45 | 0.013 | -1.33 | 0.008 | -1.44 | 0.010 | -1.39 | 0.068 |
| 1432057_a_at | PR domain containing 5                                                  | Prdm5         | 1.02  | 0.684 | -1.34 | 0.097 | -1.33 | 0.003 | -1.36 | 0.023 | -1.27 | 0.031 |
| 1418245_a_at | RNA binding motif protein 9                                             | Rbm9          | 1.18  | 0.522 | 1.1   | 0.840 | -1.33 | 0.014 | -1.16 | 0.253 | -1.15 | 0.065 |
| 1422865_at   | runt related transcription factor 1                                     | Runx1         | 2.6   | 0.402 | 2.23  | 0.699 | -1.33 | 0.038 | -1.2  | 0.171 | -1.46 | 0.020 |
| 1443762_s_at | SET binding factor 2                                                    | Sbf2          | -1.32 | 0.225 | -2.23 | 0.049 | -1.33 | 0.004 | -1.53 | 0.004 | -1.55 | 0.007 |
| 1421594_a_at | synaptotagmin-like 2                                                    | Syt12         | -1.09 | 0.141 | -2.02 | 0.004 | -1.33 | 0.004 | -1.45 | 0.027 | -1.43 | 0.026 |
| 1443993_at   | zinc finger CCH type containing 12A                                     | Zc3h12a       | 2.94  | 0.415 | 3.11  | 0.670 | -1.33 | 0.050 | -1.15 | 0.368 | -1.28 | 0.086 |
| 1453333_at   | RIKEN cDNA 1700012P22 gene                                              | 1700012P22Rik | -1.07 | 0.559 | -1.65 | 0.048 | -1.32 | 0.037 | -1.29 | 0.131 | -1.18 | 0.251 |
| 1435672_at   | hypothetical protein 3830612M24                                         | 3830612M24    | -1.16 | 0.404 | -3.21 | 0.142 | -1.32 | 0.001 | -1.66 | 0.002 | -1.43 | 0.104 |
| 1434949_at   | armadillo repeat containing 8                                           | Arm8          | -1.07 | 0.545 | -1.13 | 0.217 | -1.32 | 0.005 | -1.29 | 0.048 | -1.43 | 0.034 |
| 1434409_at   | armadillo repeat containing, X-linked 6                                 | Armxc6        | 1.46  | 0.839 | 1.92  | 0.704 | -1.32 | 0.040 | 1.88  | 0.539 | 1.16  | 0.776 |
| 1460597_at   | Additional sex combs like 2 (Drosophila)                                | Asxl2         | 1.07  | 0.838 | 1.03  | 0.755 | -1.32 | 0.019 | -1.13 | 0.229 | 1.11  | 0.228 |
| 1434769_at   | BTB (POZ) domain containing 9                                           | Btb9          | -1.34 | 0.267 | -2.53 | 0.139 | -1.32 | 0.049 | -1.95 | 0.022 | -1.67 | 0.034 |
| 1450757_at   | cadherin 11                                                             | Cdh11         | 1.18  | 0.506 | -1.18 | 0.213 | -1.32 | 0.004 | -1.3  | 0.001 | -1.35 | 0.007 |
| 1453409_at   | cell growth regulator with ring finger domain 1                         | Cgrrf1        | -1.01 | 0.691 | 1.02  | 0.796 | -1.32 | 0.048 | -1.14 | 0.211 | 1.15  | 0.196 |
| 1430161_at   | dihydroipoamide S-succinyltransferase (E2 component of 2-oxo-glut       | Dlst          | -1.23 | 0.233 | 1.39  | 0.678 | -1.32 | 0.002 | -1.01 | 0.420 | -1.01 | 0.700 |
| 1434260_at   | FCH and double SH3 domains 2                                            | Fchsd2        | -1.03 | 0.511 | -1.63 | 0.031 | -1.32 | 0.011 | -1.68 | 0.000 | -1.35 | 0.005 |
| 1460203_at   | inositol 1,4,5-triphosphate receptor 1                                  | Itp1          | -1.24 | 0.068 | -2.05 | 0.011 | -1.32 | 0.029 | -1.29 | 0.030 | -1.46 | 0.037 |
| 1434900_at   | MKL (megakaryoblastic leukemia)/myocardin-like 1                        | Mkl1          | 1.31  | 0.483 | 1.25  | 0.647 | -1.32 | 0.001 | -1.44 | 0.018 | -1.3  | 0.155 |
| 1434179_at   | myeloid/lymphoid or mixed-lineage leukemia 3                            | Mll3          | -1.06 | 0.375 | -2.61 | 0.014 | -1.32 | 0.046 | -1.36 | 0.017 | -1.88 | 0.009 |
| 1418912_at   | plexin domain containing 2                                              | Plexdc2       | -1.04 | 0.549 | -1.24 | 0.005 | -1.32 | 0.006 | -1.14 | 0.064 | -1.34 | 0.023 |
| 1452788_at   | protein phosphatase 2, regulatory subunit B (B56), epsilon isoform      | Ppp2r5e       | 3.82  | 0.240 | 3.44  | 0.799 | -1.32 | 0.049 | -1.36 | 0.045 | -1.61 | 0.012 |
| 1423025_a_at | schwannomin interacting protein 1                                       | Schip1        | 1.22  | 0.673 | -1.03 | 0.417 | -1.32 | 0.034 | -1.49 | 0.001 | -1.44 | 0.012 |
| 1419255_at   | spectrin beta 2                                                         | Spnb2         | 1.09  | 0.759 | -1.25 | 0.125 | -1.32 | 0.035 | -1.26 | 0.017 | -1.48 | 0.013 |
| 1455493_at   | synaptic nuclear envelope 1                                             | Syne1         | -1.16 | 0.375 | -2.54 | 0.079 | -1.32 | 0.039 | -1.19 | 0.136 | -1.51 | 0.018 |
| 1427685_a_at | synaptotagmin 2                                                         | Synj2         | 1.13  | 0.819 | 1.09  | 0.910 | -1.32 | 0.018 | -1.4  | 0.002 | -1.25 | 0.000 |
| 1428703_at   | RIKEN cDNA 1700012B07 gene                                              | 1700012B07Rik | -1.03 | 0.423 | 1.22  | 0.282 | -1.31 | 0.003 | 1.02  | 0.737 | 1     | 0.926 |
| 1457982_at   | RIKEN cDNA 1700052M18 gene                                              | 1700052M18Rik | 1.17  | 0.648 | 2.78  | 0.586 | -1.31 | 0.004 | 1.04  | 0.837 | 2.26  | 0.611 |
| 1454255_at   | RIKEN cDNA 5430434F05 gene                                              | 5430434F05Rik | 1.43  | 0.051 | -1.09 | 0.530 | -1.31 | 0.043 | 1.28  | 0.208 | 1.4   | 0.252 |
| 1453015_at   | RIKEN cDNA 5830471E12 gene                                              | 5830471E12Rik | -1.23 | 0.336 | -1.78 | 0.137 | -1.31 | 0.008 | -1.53 | 0.001 | -1.64 | 0.020 |
| 1435280_at   | expressed sequence AI452195                                             | AI452195      | -1.14 | 0.398 | -1.32 | 0.249 | -1.31 | 0.019 | -1.13 | 0.031 | -1.34 | 0.009 |
| 1427328_a_at | CLIP associating protein 2                                              | Clasp2        | -1.01 | 0.545 | -1.42 | 0.122 | -1.31 | 0.019 | -1.24 | 0.288 | -1.22 | 0.405 |
| 1445868_at   | cytoplasmic polyadenylation element binding protein 3                   | Cpeb3         | 1.18  | 0.663 | 1.66  | 0.782 | -1.31 | 0.013 | 1.04  | 0.669 | 1.37  | 0.365 |
| 1438658_a_at | endothelial differentiation, sphingolipid G-protein-coupled receptor, 3 | Edg3          | -1.43 | 0.285 | -2    | 0.181 | -1.31 | 0.006 | -1.29 | 0.020 | -1.37 | 0.015 |
| 1451264_at   | FERM domain containing 6                                                | Frmf6         | 1.16  | 0.580 | -1.06 | 0.583 | -1.31 | 0.016 | -1.28 | 0.014 | -1.37 | 0.002 |
| 1427746_x_at | histocompatibility 2, K1, K region                                      | H2-K1         | 1.99  | 0.785 | 1.78  | 0.604 | -1.31 | 0.007 | -1.02 | 0.906 | -1.05 | 0.473 |
| 1450692_at   | kinesin family member 4                                                 | Kif4          | 1.03  | 0.388 | -1.19 | 0.131 | -1.31 | 0.009 | -1.19 | 0.075 | -1.24 | 0.041 |
| 1435139_at   | NMDA receptor-regulated gene 1                                          | Narg1         | 1     | 0.997 | -1.16 | 0.062 | -1.31 | 0.024 | -1.15 | 0.275 | -1.4  | 0.027 |
| 1457175_at   | Numb gene homolog (Drosophila)                                          | Numb          | 1.3   | 0.271 | 1.25  | 0.997 | -1.31 | 0.047 | 1.63  | 0.636 | -1.27 | 0.174 |
| 1438413_at   | SUMO1/sentrin specific peptidase 7                                      | Senp7         | 1.1   | 0.661 | -1.19 | 0.177 | -1.31 | 0.039 | 1.13  | 0.416 | -1.04 | 0.581 |
| 1452296_at   | slit homolog 3 (Drosophila)                                             | Slt13         | -1.25 | 0.272 | -1.77 | 0.140 | -1.31 | 0.020 | -1.18 | 0.021 | -1.28 | 0.090 |
| 1452604_at   | serologically defined colon cancer antigen 13                           | Stard13       | 1.63  | 0.499 | 1.52  | 0.528 | -1.31 | 0.030 | -1.32 | 0.029 | -1.52 | 0.014 |
| 1419447_s_at | TBC1 domain family, member 1                                            | Tbcl1d1       | 1.17  | 0.447 | -1.26 | 0.126 | -1.31 | 0.003 | -1.5  | 0.001 | -1.43 | 0.009 |
| 1455308_at   | transmembrane protein 16F                                               | Tmem16f       | -1.2  | 0.296 | -1.83 | 0.088 | -1.31 | 0.008 | -1.4  | 0.019 | -1.5  | 0.007 |
| 1416231_at   | Vac14 homolog (S. cerevisiae)                                           | Vac14         | -1.11 | 0.448 | -1.45 | 0.279 | -1.31 | 0.001 | -1.24 | 0.279 | 1.16  | 0.698 |
| 1448611_at   | WW, C2 and coiled-coil domain containing 2                              | Wwc2          | -1    | 0.839 | -1.42 | 0.007 | -1.31 | 0.031 | -1.63 | 0.031 | -1.69 | 0.031 |
| 1419874_x_at | zinc finger and BTB domain containing 16                                | Zbtb16        | -1.07 | 0.446 | -1.11 | 0.403 | -1.31 | 0.028 | 2.5   | 0.213 | 1.4   | 0.295 |

|              |                                                                                              |               |       |       |       |       |       |       |       |       |       |       |
|--------------|----------------------------------------------------------------------------------------------|---------------|-------|-------|-------|-------|-------|-------|-------|-------|-------|-------|
| 1429946_at   | RIKEN cDNA 2610301F02 gene                                                                   | 2610301F02Rik | -1.18 | 0.382 | -1.09 | 0.522 | -1.3  | 0.014 | 1.62  | 0.153 | 1.22  | 0.723 |
| 1448460_at   | activin A receptor, type 1                                                                   | Acvr1         | 1.31  | 0.908 | 1.14  | 0.453 | -1.3  | 0.043 | -1.4  | 0.003 | -1.55 | 0.001 |
| 1441228_at   | apolipoprotein L domain containing 1                                                         | Apold1        | 1.1   | 0.658 | 1.25  | 0.142 | -1.3  | 0.030 | 1.14  | 0.165 | 1.04  | 0.984 |
| 1427630_x_at | CEA-related cell adhesion molecule 1                                                         | Ceacam1       | 1.05  | 0.618 | 1.99  | 0.516 | -1.3  | 0.029 | 1.88  | 0.979 | -1.11 | 0.489 |
| 1453872_at   | doublesex and mab-3 related transcription factor like family C2                              | Dmrtc2        | -1.12 | 0.321 | 1.12  | 0.697 | -1.3  | 0.029 | 1.41  | 0.609 | 1.22  | 0.519 |
| 1423065_at   | DNA methyltransferase 3A                                                                     | Dnmt3a        | -1.33 | 0.330 | -1.64 | 0.212 | -1.3  | 0.017 | -1.41 | 0.140 | -1.33 | 0.171 |
| 1423626_at   | dystonin                                                                                     | Dst           | 1.01  | 0.786 | -1.21 | 0.059 | -1.3  | 0.020 | -1.18 | 0.079 | -1.32 | 0.068 |
| 1451977_at   | dual-specificity tyrosine-(Y)-phosphorylation regulated kinase 1a                            | Dyrk1a        | 1.65  | 0.575 | 1.47  | 0.658 | -1.3  | 0.009 | -1.28 | 0.022 | -1.29 | 0.035 |
| 1452280_at   | FERM, RhoGEF (Arhgef) and pleckstrin domain protein 1 (chondrocyte)                          | Farp1         | 1.44  | 0.705 | -1.2  | 0.200 | -1.3  | 0.019 | -1.44 | 0.000 | -1.65 | 0.000 |
| 1439662_at   | homer homolog 1 (Drosophila)                                                                 | Homer1        | -1.03 | 0.569 | -1.27 | 0.265 | -1.3  | 0.048 | -1.18 | 0.155 | -1.14 | 0.307 |
| 1432296_a_at | integrin alpha V                                                                             | Itgav         | 1.13  | 0.393 | -1.68 | 0.034 | -1.3  | 0.008 | 1.22  | 0.304 | -1.02 | 0.349 |
| 1427809_at   | Latrophilin 3                                                                                | Lphn3         | 1.71  | 0.105 | -1.34 | 0.035 | -1.3  | 0.028 | 1.67  | 0.859 | 1.05  | 0.651 |
| 1427185_at   | myocyte enhancer factor 2A                                                                   | Mef2a         | 1.34  | 0.328 | 1.03  | 0.814 | -1.3  | 0.009 | -1.4  | 0.017 | -1.51 | 0.012 |
| 1443498_at   | methylmalonic aciduria (cobalamin deficiency) type B homolog (hum)                           | Mmab          | -1.38 | 0.061 | -1.13 | 0.248 | -1.3  | 0.010 | -1.57 | 0.044 | -1.05 | 0.694 |
| 1438684_at   | NUAK family, SNF1-like kinase, 1                                                             | Nuak1         | -1.22 | 0.248 | -1.41 | 0.152 | -1.3  | 0.006 | -1.32 | 0.030 | -1.4  | 0.010 |
| 1449120_a_at | pericentriolar material 1                                                                    | Pcm1          | 1.26  | 0.462 | 1.17  | 0.659 | -1.3  | 0.050 | -1.25 | 0.124 | -1.15 | 0.329 |
| 1442171_at   | PRP40 pre-mRNA processing factor 40 homolog A (yeast)                                        | Prpf40a       | 1.04  | 0.735 | 1.04  | 0.701 | -1.3  | 0.042 | -1.02 | 0.728 | -1.14 | 0.432 |
| 1450122_at   | protein tyrosine phosphatase, receptor type, G                                               | Ptprg         | 3.12  | 0.668 | 2.32  | 0.778 | -1.3  | 0.016 | -1.16 | 0.195 | -1.31 | 0.040 |
| 1456153_at   | slingshot homolog 2 (Drosophila)                                                             | Ssh2          | 1.21  | 0.251 | -1.46 | 0.012 | -1.3  | 0.002 | -1.26 | 0.087 | -1.62 | 0.007 |
| 1450396_at   | stromal antigen 2                                                                            | Stag2         | 1.23  | 0.139 | 1.06  | 0.766 | -1.3  | 0.013 | -1.13 | 0.169 | -1.37 | 0.059 |
| 1418057_at   | T-cell lymphoma invasion and metastasis 1                                                    | Tiam1         | -1.28 | 0.188 | -2.08 | 0.033 | -1.3  | 0.024 | -1.19 | 0.362 | -1.51 | 0.048 |
| 1447370_at   | Transmembrane protein 16A                                                                    | Tmem16a       | -1.27 | 0.184 | -2.23 | 0.051 | -1.3  | 0.028 | -1.05 | 0.616 | 1.02  | 0.744 |
| 1423036_at   | thioredoxin-like 5                                                                           | Txn15         | 1.42  | 0.157 | 1.13  | 0.534 | -1.3  | 0.013 | -1.07 | 0.485 | 1.15  | 0.609 |
| 1456389_at   | zinc finger homeobox 1b                                                                      | Zfxh1b        | 1.06  | 0.363 | -1.39 | 0.029 | -1.3  | 0.015 | -1.31 | 0.075 | -1.47 | 0.022 |
| 1453384_at   | RIKEN cDNA 4632404N19 gene                                                                   | 4632404N19Rik | 1.06  | 0.951 | -1.09 | 0.498 | -1.29 | 0.041 | -1.33 | 0.286 | -1.66 | 0.051 |
| 1449709_s_at | arginine-tRNA-protein transferase 1                                                          | Ate1          | 1.07  | 0.569 | -1.22 | 0.145 | -1.29 | 0.031 | -1.33 | 0.026 | -1.51 | 0.004 |
| 1450457_at   | Casitas B-lineage lymphoma                                                                   | Cbl           | 1.5   | 0.729 | 1.77  | 0.683 | -1.29 | 0.001 | -1.09 | 0.130 | 1.05  | 0.959 |
| 1455440_at   | chloride channel 6                                                                           | Clcn6         | 1.02  | 0.952 | -1.26 | 0.012 | -1.29 | 0.025 | -1.2  | 0.188 | -1.37 | 0.013 |
| 1428806_at   | casein kinase 1, gamma 1                                                                     | Csnk1g1       | 1     | 0.927 | -1.06 | 0.482 | -1.29 | 0.001 | -1.46 | 0.002 | -1.41 | 0.005 |
| 1438045_at   | early endosome antigen 1                                                                     | Eea1          | 1.27  | 0.275 | -1.34 | 0.109 | -1.29 | 0.027 | -1.24 | 0.012 | -1.59 | 0.038 |
| 1425142_a_at | heterogeneous nuclear ribonucleoprotein D                                                    | Hnrpd         | -1.11 | 0.036 | -1.3  | 0.026 | -1.29 | 0.008 | -1.24 | 0.008 | -1.19 | 0.103 |
| 1434129_s_at | lipoma HMGIC fusion partner-like 2                                                           | Lhfp12        | -1.04 | 0.817 | -1.68 | 0.014 | -1.29 | 0.008 | -1.18 | 0.055 | -1.5  | 0.019 |
| 1434674_at   | lysosomal trafficking regulator                                                              | Lyst          | 1.54  | 0.537 | -1.59 | 0.107 | -1.29 | 0.034 | -1.38 | 0.063 | -1.59 | 0.012 |
| 1427212_at   | mitogen-activated protein kinase associated protein 1                                        | Mapkap1       | 1.39  | 0.788 | -1.39 | 0.111 | -1.29 | 0.016 | -1.45 | 0.003 | -1.48 | 0.007 |
| 1432177_a_at | menage a trois 1                                                                             | Mnat1         | 1.11  | 0.613 | -1.31 | 0.082 | -1.29 | 0.024 | -1.49 | 0.022 | -1.61 | 0.003 |
| 1435463_s_at | myosin ID                                                                                    | Myo1d         | -1.18 | 0.000 | -2.15 | 0.003 | -1.29 | 0.000 | -1.26 | 0.004 | -1.31 | 0.014 |
| 1423202_a_at | nuclear receptor co-repressor 1                                                              | Ncor1         | 1.09  | 0.341 | -1.09 | 0.615 | -1.29 | 0.041 | -1.32 | 0.070 | -1.57 | 0.056 |
| 1434653_at   | PTK2 protein tyrosine kinase 2 beta                                                          | Ptk2b         | -1.05 | 0.703 | -1.83 | 0.010 | -1.29 | 0.003 | -1.41 | 0.026 | -1.29 | 0.125 |
| 1433871_at   | R3H domain 1 (binds single-stranded nucleic acids)                                           | R3hdm1        | 1.06  | 0.334 | -1.23 | 0.014 | -1.29 | 0.031 | -1.17 | 0.004 | -1.19 | 0.023 |
| 1436923_at   | RAB2B, member RAS oncogene family                                                            | Rab2b         | 1.07  | 0.371 | 1.1   | 0.386 | -1.29 | 0.031 | 1.22  | 0.225 | -1.05 | 0.481 |
| 1455181_at   | RAS p21 protein activator 2                                                                  | Rasa2         | -1.01 | 0.704 | -1.38 | 0.135 | -1.29 | 0.032 | -1.4  | 0.020 | -1.5  | 0.020 |
| 1438932_at   | RAS, guanyl releasing protein 2                                                              | Rasgrp2       | 1.06  | 0.703 | 1.13  | 0.896 | -1.29 | 0.042 | 1.48  | 0.064 | 1.13  | 0.537 |
| 1455936_a_at | RNA binding protein gene with multiple splicing                                              | Rbpm5         | -1.34 | 0.314 | -1.88 | 0.150 | -1.29 | 0.026 | -1.44 | 0.001 | -1.24 | 0.098 |
| 1452964_at   | tubulin tyrosine ligase-like family, member 11                                               | Till11        | -1.15 | 0.202 | -1.93 | 0.021 | -1.29 | 0.046 | -1.32 | 0.017 | -1.55 | 0.032 |
| 1448939_at   | ubiquitin specific peptidase 25                                                              | Usp25         | -1.07 | 0.527 | -1.45 | 0.024 | -1.29 | 0.014 | -1.29 | 0.095 | -1.2  | 0.322 |
| 1434393_at   | ubiquitin specific peptidase 34                                                              | Usp34         | 1.57  | 0.150 | 1.09  | 0.548 | -1.29 | 0.011 | -1.4  | 0.014 | -1.83 | 0.015 |
| 1434517_at   | WD repeat and FYVE domain containing 2                                                       | Wdfy2         | -1.27 | 0.328 | -1.84 | 0.174 | -1.29 | 0.016 | -1.28 | 0.003 | -1.21 | 0.194 |
| 1438580_at   | zinc finger, CCHC domain containing 7                                                        | Zcchc7        | 1.24  | 0.271 | -1.23 | 0.228 | -1.29 | 0.043 | -1.18 | 0.237 | -2    | 0.025 |
| 1443005_at   | zinc finger homeobox 1a                                                                      | Zfxh1a        | -1.24 | 0.029 | -1.51 | 0.031 | -1.29 | 0.041 | -1.33 | 0.117 | 1.04  | 0.912 |
| 1458439_a_at | RIKEN cDNA 2310047C04 gene                                                                   | 2310047C04Rik | 1.02  | 0.647 | -1.48 | 0.269 | -1.28 | 0.002 | 1.02  | 0.848 | -1.35 | 0.067 |
| 1453451_at   | RIKEN cDNA 682040219 gene                                                                    | 682040219Rik  | 1.14  | 0.961 | -1.39 | 0.203 | -1.28 | 0.042 | -1.12 | 0.239 | -1.45 | 0.137 |
| 1439827_at   | a disintegrin-like and metalloproteinase (reprolysin type) with thrombospondin type 1 motifs | Adamts12      | 1.22  | 0.304 | -1.02 | 0.634 | -1.28 | 0.003 | -1.07 | 0.078 | -1.3  | 0.019 |
| 1454763_at   | ankyrin repeat domain 17                                                                     | Ankrd17       | 1.59  | 0.304 | 1.63  | 0.542 | -1.28 | 0.004 | -1.36 | 0.005 | -1.46 | 0.001 |
| 1427193_at   | bromodomain containing 8                                                                     | Brd8          | 1.47  | 0.113 | -1.22 | 0.370 | -1.28 | 0.008 | -1.23 | 0.289 | -1.19 | 0.394 |
| 1456523_at   | expressed sequence C77713                                                                    | C77713        | 1.61  | 0.624 | 1.13  | 0.488 | -1.28 | 0.002 | -1.25 | 0.032 | -1.3  | 0.003 |
| 1439511_at   | Cyclin-dependent kinase 7 (homolog of Xenopus MO15 cdk-activating kinase)                    | Cdk7          | 2.3   | 0.452 | 2.32  | 0.820 | -1.28 | 0.044 | -1.08 | 0.577 | -1.07 | 0.649 |
| 1439820_at   | Early B-cell factor 1                                                                        | Ebf1          | 1.68  | 0.247 | 1.57  | 0.186 | -1.28 | 0.008 | -1.8  | 0.106 | -1.68 | 0.140 |
| 1438405_at   | fibroblast growth factor 7                                                                   | Fgf7          | 1.25  | 0.173 | 1.09  | 0.571 | -1.28 | 0.001 | -1.26 | 0.003 | -1.21 | 0.102 |



|              |                                                                          |                    |       |       |       |       |       |       |       |       |       |       |
|--------------|--------------------------------------------------------------------------|--------------------|-------|-------|-------|-------|-------|-------|-------|-------|-------|-------|
| 1433482_a_at | far upstream element (FUSE) binding protein 1                            | Fubp1              | 1.08  | 0.679 | -1.15 | 0.179 | -1.28 | 0.016 | -1.16 | 0.030 | -1.3  | 0.009 |
| 1434825_at   | similar to CAGL79                                                        | LOC381742          | -1.02 | 0.654 | -1.06 | 0.510 | -1.28 | 0.001 | -1.3  | 0.026 | -1.12 | 0.288 |
| 1448870_at   | latent transforming growth factor beta binding protein 1                 | Ltpb1              | -1.13 | 0.155 | -1.35 | 0.038 | -1.28 | 0.009 | -1.28 | 0.007 | -1.41 | 0.181 |
| 1430619_a_at | mevalonate kinase /// similar to mevalonate kinase                       | Mvk /// LOC637711  | 1.99  | 0.399 | 1.75  | 0.843 | -1.28 | 0.007 | 1.02  | 0.816 | -1.03 | 0.518 |
| 1425761_a_at | nuclear factor of activated T-cells, cytoplasmic, calcineurin-depende    | Nfatc1             | 1.35  | 0.583 | 1.44  | 0.716 | -1.28 | 0.031 | -1.15 | 0.087 | -1.17 | 0.239 |
| 1426464_at   | nuclear receptor subfamily 1, group D, member 1                          | Nr1d1              | -1.17 | 0.113 | -1.01 | 0.783 | -1.28 | 0.021 | 1.03  | 0.936 | -1.16 | 0.206 |
| 1428484_at   | oxysterol binding protein-like 3                                         | Osbpl3             | -1.03 | 0.297 | -1.59 | 0.026 | -1.28 | 0.005 | -1.25 | 0.078 | -1.4  | 0.000 |
| 1447640_s_at | pre B-cell leukemia transcription factor 3                               | Pbx3               | -1.17 | 0.432 | -2.01 | 0.182 | -1.28 | 0.004 | -1.48 | 0.009 | -1.39 | 0.029 |
| 1456303_at   | PHD finger protein 14                                                    | Phf14              | -1    | 0.759 | -1    | 0.954 | -1.28 | 0.034 | 1.12  | 0.990 | -1.65 | 0.043 |
| 1450916_at   | staufer (RNA binding protein) homolog 2 (Drosophila)                     | Stau2              | 1.04  | 0.892 | -1.99 | 0.050 | -1.28 | 0.043 | -1.33 | 0.018 | -1.35 | 0.016 |
| 1455353_at   | transmembrane and coiled coil domains 1                                  | Tmcc1              | 1.28  | 0.054 | 1.03  | 0.682 | -1.28 | 0.023 | -1.02 | 0.713 | -1.49 | 0.001 |
| 1426977_at   | ubiquitin specific peptidase 47                                          | Usp47              | 1.16  | 0.321 | -1.06 | 0.572 | -1.28 | 0.025 | -1.18 | 0.026 | -1.47 | 0.017 |
| 1430060_at   | RIKEN cDNA 1700034G24 gene                                               | 1700034G24Rik      | 1.01  | 0.934 | 1.11  | 0.668 | -1.27 | 0.022 | -1.13 | 0.249 | 1.01  | 0.887 |
| 1451450_at   | RIKEN cDNA 2010011I20 gene                                               | 2010011I20Rik      | -1.18 | 0.028 | -1.15 | 0.204 | -1.27 | 0.039 | 1.14  | 0.247 | 1.39  | 0.003 |
| 1430831_at   | RIKEN cDNA 4930404J24 gene                                               | 4930404J24Rik      | 1.3   | 0.796 | 1.56  | 0.514 | -1.27 | 0.034 | 1.62  | 0.373 | 1.27  | 0.410 |
| 1435825_at   | activin A receptor, type II-like 1                                       | Acvr11             | 2.59  | 0.366 | 4.55  | 0.166 | -1.27 | 0.041 | 1.23  | 0.101 | 1.39  | 0.093 |
| 1439127_at   | expressed sequence AI314180                                              | AI314180           | -1.29 | 0.339 | -1.46 | 0.271 | -1.27 | 0.029 | -1.06 | 0.510 | -1.13 | 0.371 |
| 1435768_at   | AT rich interactive domain 4B (Rbp1 like)                                | Arid4b             | 1.05  | 0.973 | -1.02 | 0.741 | -1.27 | 0.015 | -1.42 | 0.088 | -1.52 | 0.014 |
| 1439120_at   | cDNA sequence BC010304                                                   | BC010304           | -1.16 | 0.392 | -1.21 | 0.252 | -1.27 | 0.002 | -1.13 | 0.168 | -1.07 | 0.486 |
| 1437857_at   | dpy-19-like 3 (C. elegans)                                               | Dpy19l3            | -1.32 | 0.202 | -1.73 | 0.115 | -1.27 | 0.047 | -1.04 | 0.650 | -1.08 | 0.366 |
| 1419308_at   | inversin                                                                 | Invs               | -1.14 | 0.426 | -2.63 | 0.083 | -1.27 | 0.038 | -1.09 | 0.372 | -1.31 | 0.021 |
| 1431922_at   | intestine specific homeobox                                              | Isx                | 1.19  | 0.602 | -1.17 | 0.336 | -1.27 | 0.042 | 1     | 0.841 | 1.25  | 0.259 |
| 1418232_s_at | LIM and senescent cell antigen-like domains 1                            | Lims1              | 1.55  | 0.387 | 1.08  | 0.804 | -1.27 | 0.004 | -1.27 | 0.009 | -1.44 | 0.008 |
| 1419951_at   | Lectin, mannose-binding, 1                                               | Lman1              | -1.11 | 0.467 | 1.05  | 0.725 | -1.27 | 0.030 | 1.25  | 0.046 | 1.03  | 0.877 |
| 1418316_a_at | MAP/microtubule affinity-regulating kinase 3                             | Mark3              | -1.03 | 0.547 | -1    | 0.975 | -1.27 | 0.043 | -1.17 | 0.133 | -1.21 | 0.091 |
| 1435649_at   | nexilin                                                                  | Nexn               | 1.1   | 0.471 | -1.14 | 0.173 | -1.27 | 0.010 | -1.03 | 0.525 | -1.03 | 0.437 |
| 1427705_a_at | nuclear factor of kappa light chain gene enhancer in B-cells 1, p105     | Nfkb1              | 1.08  | 0.418 | -1.06 | 0.673 | -1.27 | 0.005 | -1.25 | 0.007 | -1.3  | 0.009 |
| 1417148_at   | platelet derived growth factor receptor, beta polypeptide                | Pdgfrb             | 1.19  | 0.743 | 1.01  | 0.722 | -1.27 | 0.041 | -1.14 | 0.230 | -1.4  | 0.001 |
| 1437295_at   | protein kinase N2                                                        | Pkn2               | 1.19  | 0.183 | -1.04 | 0.510 | -1.27 | 0.024 | -1.33 | 0.016 | -1.32 | 0.021 |
| 1422673_at   | protein kinase C, mu                                                     | Prkcm              | -1.38 | 0.174 | -2.74 | 0.022 | -1.27 | 0.036 | -1.55 | 0.003 | -1.53 | 0.045 |
| 1434360_s_at | protein tyrosine phosphatase, receptor type, G /// similar to protein ty | Ptprg /// LOC63266 | 1.42  | 0.865 | -1.02 | 0.334 | -1.27 | 0.045 | -1.24 | 0.063 | -1.31 | 0.007 |
| 1448584_at   | arginine/serine-rich coiled-coil 1                                       | Rsrc1              | -1.09 | 0.255 | -1.42 | 0.067 | -1.27 | 0.010 | -1.17 | 0.008 | -1.36 | 0.015 |
| 1435516_x_at | regulator of telomere elongation helicase 1                              | Rtel1              | 1.74  | 0.475 | 2.2   | 0.169 | -1.27 | 0.007 | 1.18  | 0.351 | -1.14 | 0.573 |
| 1439161_at   | SAPS domain family, member 3                                             | Saps3              | -1.01 | 0.993 | -1.15 | 0.546 | -1.27 | 0.024 | -1.07 | 0.535 | -1.01 | 0.935 |
| 1428396_at   | SMAD specific E3 ubiquitin protein ligase 1 /// similar to Smad ubiqu    | Smurf1 /// LOC640  | 2.4   | 0.944 | 2.7   | 0.838 | -1.27 | 0.048 | 1.08  | 0.289 | -1.26 | 0.010 |
| 1424652_at   | transmembrane protein 166                                                | Tmem166            | 1.15  | 0.276 | 1.24  | 0.147 | -1.27 | 0.000 | -1.25 | 0.004 | -1.19 | 0.095 |
| 1423898_a_at | thyroid hormone receptor interactor 12                                   | Trip12             | -1.09 | 0.314 | -1.28 | 0.051 | -1.27 | 0.006 | -1.35 | 0.002 | -1.4  | 0.002 |
| 1422031_a_at | zinc finger, AN1-type domain 6                                           | Zfand6             | 1.9   | 0.307 | 1.23  | 0.666 | -1.27 | 0.011 | 1.01  | 0.832 | -1.18 | 0.156 |
| 1455407_at   | zinc finger protein 236                                                  | Zfp236             | 1.09  | 0.299 | -1.36 | 0.102 | -1.27 | 0.009 | -1.3  | 0.067 | -1.42 | 0.021 |
| 1457383_at   | RIKEN cDNA 1500011J06 gene                                               | 1500011J06Rik      | 1.12  | 0.406 | -1.13 | 0.408 | -1.26 | 0.001 | 1.01  | 0.971 | -1.35 | 0.107 |
| 1457759_at   | RIKEN cDNA A630081D01 gene                                               | A630081D01Rik      | 1.1   | 0.987 | 1.17  | 0.854 | -1.26 | 0.030 | 1.07  | 0.817 | 1.24  | 0.112 |
| 1426755_at   | cytoskeleton-associated protein 4                                        | Ckap4              | -1.2  | 0.015 | -1.22 | 0.045 | -1.26 | 0.045 | 1.03  | 0.775 | 1.05  | 0.553 |
| 1427563_at   | distal-less homeobox 6, antisense                                        | Dlx6as             | 1.98  | 0.272 | 1.4   | 0.444 | -1.26 | 0.015 | 1.09  | 0.313 | 1.11  | 0.849 |
| 1429028_at   | dedicator of cytokinesis 11                                              | Dock11             | -1.02 | 0.630 | -1.9  | 0.083 | -1.26 | 0.008 | -1.39 | 0.028 | -1.48 | 0.014 |
| 1452718_at   | E3 ubiquitin protein ligase, HECT domain containing, 1                   | Edd1               | -1.05 | 0.481 | -1.13 | 0.125 | -1.26 | 0.021 | -1.29 | 0.021 | -1.39 | 0.006 |
| 1434285_at   | FERM domain containing 4A                                                | Frm4a              | -1.07 | 0.386 | -1.15 | 0.109 | -1.26 | 0.017 | -1.27 | 0.077 | -1.31 | 0.042 |
| 1434754_at   | GTPase activating RANGAP domain-like 4                                   | Garnl4             | -1.14 | 0.012 | -1.41 | 0.009 | -1.26 | 0.014 | -1.29 | 0.011 | -1.55 | 0.005 |
| 1418492_at   | gremlin 2 homolog, cysteine knot superfamily (Xenopus laevis)            | Grem2              | 1.13  | 0.632 | -1.16 | 0.309 | -1.26 | 0.031 | -1.27 | 0.013 | -1.33 | 0.004 |
| 1437103_at   | insulin-like growth factor 2 mRNA binding protein 2                      | Igf2bp2            | 1.01  | 0.898 | -1.27 | 0.042 | -1.26 | 0.003 | -1.25 | 0.001 | -1.37 | 0.009 |
| 1418983_at   | InaD-like (Drosophila)                                                   | Inadl              | -1.25 | 0.263 | -1.11 | 0.445 | -1.26 | 0.016 | -1.11 | 0.472 | 1.05  | 0.878 |
| 1415847_at   | lactate dehydrogenase C                                                  | Ldhc               | 1.7   | 0.758 | 1.98  | 0.977 | -1.26 | 0.035 | 1.88  | 0.910 | 2.25  | 0.226 |
| 1426528_at   | neuropilin 2                                                             | Nrp2               | -1.15 | 0.050 | -1.71 | 0.001 | -1.26 | 0.023 | -1.4  | 0.001 | -1.37 | 0.053 |
| 1449404_at   | phosphatidylinositol-4-phosphate 5-kinase, type II, alpha                | Pip5k2a            | -1.2  | 0.260 | -2.02 | 0.055 | -1.26 | 0.008 | -1.34 | 0.003 | -1.37 | 0.006 |
| 1426382_at   | protein phosphatase 1B, magnesium dependent, beta isoform                | Ppm1b              | -1.08 | 0.263 | -1.37 | 0.011 | -1.26 | 0.034 | -1.31 | 0.005 | -1.34 | 0.000 |
| 1457200_at   | serine (or cysteine) peptidase inhibitor, clade B, member 9d             | Serpib9d           | -1.41 | 0.219 | -1.46 | 0.122 | -1.26 | 0.029 | -1.07 | 0.412 | 1.17  | 0.806 |
| 1416944_a_at | tousled-like kinase 2 (Arabidopsis)                                      | Tlk2               | -1.03 | 0.622 | -1.1  | 0.213 | -1.26 | 0.027 | -1.61 | 0.000 | -1.33 | 0.006 |
| 1451378_at   | UTP6, small subunit (SSU) processome component, homolog (yeast)          | Utp6               | 1.32  | 0.426 | 1.52  | 0.063 | -1.26 | 0.045 | -1.04 | 0.735 | 1.08  | 0.725 |
| 1458202_at   | RIKEN cDNA 6330500D04 gene                                               | 6330500D04Rik      | -1.25 | 0.362 | -1.14 | 0.341 | -1.25 | 0.025 | -1.04 | 0.645 | 1.24  | 0.462 |

|              |                                                                        |                   |       |       |       |       |       |       |       |       |       |       |
|--------------|------------------------------------------------------------------------|-------------------|-------|-------|-------|-------|-------|-------|-------|-------|-------|-------|
| 1440884_s_at | RIKEN cDNA A530047J11 gene                                             | A530047J11Rik     | -1.45 | 0.231 | -1.73 | 0.197 | -1.25 | 0.027 | -1.2  | 0.172 | -1.24 | 0.113 |
| 1428336_at   | 1-acylglycerol-3-phosphate O-acyltransferase 1 (lysophosphatidic ac    | Agpat4            | -1.1  | 0.335 | -1.49 | 0.009 | -1.25 | 0.033 | -1.17 | 0.010 | -1.29 | 0.001 |
| 1434221_at   | cDNA sequence BC030863                                                 | BC030863          | 1.68  | 0.351 | 1.02  | 0.505 | -1.25 | 0.018 | -1.47 | 0.003 | -1.43 | 0.015 |
| 1450339_a_at | B-cell leukemia/lymphoma 11B                                           | Bcl11b            | -1.01 | 0.529 | -1.05 | 0.383 | -1.25 | 0.012 | -1.05 | 0.398 | -1.39 | 0.109 |
| 1434310_at   | bone morphogenic protein receptor, type II (serine/threonine kinase)   | Bmpr2             | -1.04 | 0.375 | -1.49 | 0.014 | -1.25 | 0.013 | -1.18 | 0.127 | -1.44 | 0.005 |
| 1453100_at   | casein kinase 2, alpha prime polypeptide                               | Csnk2a2           | 2.63  | 0.428 | 1.93  | 0.332 | -1.25 | 0.035 | -1.02 | 0.705 | -1.38 | 0.089 |
| 1428408_a_at | DNA segment, Chr 12, ERATO Doi 551, expressed                          | D12Entd551e       | 1.34  | 0.475 | -1.09 | 0.400 | -1.25 | 0.001 | -1.14 | 0.042 | -1.32 | 0.018 |
| 1459906_at   | Diacylglycerol kinase, eta                                             | Dgkh              | -1.1  | 0.496 | -1.4  | 0.228 | -1.25 | 0.036 | -1.22 | 0.249 | -1.4  | 0.113 |
| 1453746_at   | formin binding protein 1                                               | Fbnp1             | -1.27 | 0.369 | -1.42 | 0.298 | -1.25 | 0.021 | -1.29 | 0.023 | -1.2  | 0.042 |
| 1415757_at   | golgi-specific brefeldin A-resistance factor 1                         | Gbf1              | 1.48  | 0.816 | 1     | 0.364 | -1.25 | 0.010 | -1.21 | 0.002 | -1.41 | 0.001 |
| 1426491_at   | hect (homologous to the E6-AP (UBE3A) carboxyl terminus) domain        | Herc2             | -1.13 | 0.065 | -1.32 | 0.050 | -1.25 | 0.001 | -1.3  | 0.054 | -1.4  | 0.006 |
| 1446674_at   | Kinesin 2                                                              | Kns2              | 1.19  | 0.923 | 1.83  | 0.052 | -1.25 | 0.021 | 1.16  | 0.987 | -1.06 | 0.439 |
| 1451999_at   | LIM domain binding 3                                                   | Ldb3              | 1.14  | 0.749 | -1.25 | 0.321 | -1.25 | 0.007 | -1.14 | 0.395 | -1.04 | 0.456 |
| 1450253_a_at | mitogen activated protein kinase kinase 4                              | Map3k4            | 5     | 0.453 | 5.04  | 0.849 | -1.25 | 0.037 | -1.11 | 0.389 | -1.26 | 0.018 |
| 1459512_at   | Myeloid ecotropic viral integration site 1                             | Meis1             | 1.85  | 0.452 | 1.57  | 0.414 | -1.25 | 0.019 | 1.12  | 0.701 | 1.08  | 0.329 |
| 1434181_at   | pleckstrin homology domain containing, family C (with FERM domain)     | Plekhc1           | 1.19  | 0.374 | -1.2  | 0.223 | -1.25 | 0.008 | -1.17 | 0.011 | -1.31 | 0.039 |
| 1458171_at   | solute carrier organic anion transporter family, member 2b1            | Sloc2b1           | 1.12  | 0.804 | 1.27  | 0.569 | -1.25 | 0.023 | -1.92 | 0.031 | -1.07 | 0.562 |
| 1423658_at   | signal peptide peptidase 3                                             | Spp3              | -1.12 | 0.361 | -1.29 | 0.084 | -1.25 | 0.048 | -1.41 | 0.050 | -1.26 | 0.047 |
| 1460735_at   | supervillin                                                            | Svil              | 1.1   | 0.774 | -1.41 | 0.101 | -1.25 | 0.026 | -1.36 | 0.005 | -1.43 | 0.003 |
| 1451795_at   | target of myb1-like 2 (chicken)                                        | Tom12             | -1.24 | 0.393 | -1.54 | 0.107 | -1.25 | 0.030 | 1.14  | 0.826 | 1.15  | 0.625 |
| 1421096_at   | transient receptor potential cation channel, subfamily C, member 1     | Trpc1             | 1.07  | 0.843 | -1.07 | 0.531 | -1.25 | 0.012 | -1.07 | 0.146 | -1.08 | 0.379 |
| 1435235_at   | thioredoxin-like 1                                                     | Txn11             | -1.11 | 0.492 | -1.24 | 0.320 | -1.25 | 0.002 | -1.33 | 0.006 | -1.21 | 0.107 |
| 1419575_s_at | zinc finger protein 292                                                | Zfp292            | 1.26  | 0.741 | 1.09  | 0.929 | -1.25 | 0.039 | -1.16 | 0.201 | -1.17 | 0.199 |
| 1417038_at   | septin 9                                                               | 9-Sep             | 1.09  | 0.765 | -1.32 | 0.082 | -1.24 | 0.028 | -1.13 | 0.045 | -1.11 | 0.226 |
| 1449923_at   | RIKEN cDNA 1700018F24 gene                                             | 1700018F24Rik     | 1.2   | 0.410 | -1.1  | 0.549 | -1.24 | 0.023 | -1.06 | 0.480 | 1.04  | 0.678 |
| 1448019_at   | RIKEN cDNA 2900006A08 gene                                             | 2900006A08Rik     | 1.09  | 0.738 | -1.05 | 0.635 | -1.24 | 0.022 | -1.29 | 0.209 | -1.29 | 0.062 |
| 1454594_at   | RIKEN cDNA 2900078111 gene                                             | 2900078111Rik     | 1.14  | 0.262 | -1.03 | 0.738 | -1.24 | 0.014 | -1.02 | 0.750 | -1.38 | 0.098 |
| 1433169_at   | RIKEN cDNA 5830456J23 gene                                             | 5830456J23Rik     | 1.03  | 0.665 | 1.2   | 0.971 | -1.24 | 0.045 | -1.43 | 0.181 | -1.38 | 0.219 |
| 1457389_at   | RIKEN cDNA 9830166K06 gene                                             | 9830166K06Rik     | -1.31 | 0.132 | 1.34  | 0.541 | -1.24 | 0.029 | 1.67  | 0.677 | -1.2  | 0.206 |
| 1437072_at   | Rho GTPase activating protein 25                                       | Arhgap25          | 1.85  | 0.942 | 1.29  | 0.381 | -1.24 | 0.039 | 1.51  | 0.226 | 1.13  | 0.917 |
| 1435248_a_at | BTAF1 RNA polymerase II, B-TFIID transcription factor-associated, 1    | Btaf1             | 1.09  | 0.044 | 1.07  | 0.348 | -1.24 | 0.001 | -1.24 | 0.009 | -1.37 | 0.005 |
| 1427844_a_at | CCAAT/enhancer binding protein (C/EBP), beta                           | Cebpb             | 1.54  | 0.581 | 1.28  | 0.451 | -1.24 | 0.008 | 1.23  | 0.034 | 1.13  | 0.042 |
| 1445017_at   | CCR4-NOT transcription complex, subunit 2                              | Cnot2             | -1.45 | 0.058 | -1.24 | 0.208 | -1.24 | 0.049 | 1.17  | 0.235 | 1.23  | 0.518 |
| 1426408_at   | CUG triplet repeat, RNA binding protein 1                              | Cugbp1            | -1.19 | 0.267 | -1.43 | 0.190 | -1.24 | 0.028 | -1.17 | 0.114 | -1.26 | 0.073 |
| 1428384_at   | DNA segment, Chr 4, Brigham & Women's Genetics 0951 expressed          | D4Bwg0951e        | 1.49  | 0.399 | 1.15  | 0.774 | -1.24 | 0.015 | -1.09 | 0.051 | -1.32 | 0.002 |
| 1417321_at   | DNA segment, Chr 4, Wayne State University 132, expressed              | D4Wsu132e         | -1.22 | 0.383 | -1.41 | 0.301 | -1.24 | 0.025 | -1.68 | 0.012 | -1.81 | 0.019 |
| 1439493_at   | RIKEN cDNA D630040G17 gene /// similar to zinc finger protein 64 (     | D630040G17Rik /// | -1.16 | 0.298 | -1.58 | 0.036 | -1.24 | 0.041 | -1.57 | 0.003 | -1.31 | 0.047 |
| 1424270_at   | doublecortin and calcium/calmodulin-dependent protein kinase-like 1    | Dcamk1            | -1.03 | 0.760 | -1.31 | 0.308 | -1.24 | 0.002 | 1.15  | 0.947 | -1.21 | 0.259 |
| 1450522_a_at | H1 histone family, member 0                                            | H1f0              | 1.11  | 0.933 | 1.05  | 0.576 | -1.24 | 0.000 | 1.01  | 0.926 | -1.04 | 0.457 |
| 1425969_a_at | Huntington disease gene homolog                                        | Hdh               | -1.27 | 0.254 | -1.45 | 0.160 | -1.24 | 0.029 | -1.24 | 0.034 | -1.41 | 0.002 |
| 1429063_s_at | kinesin family member 16B                                              | Kif16b            | -1.31 | 0.259 | -6.74 | 0.022 | -1.24 | 0.046 | -1.72 | 0.000 | -2.03 | 0.053 |
| 1455217_at   | leucine-rich repeats and immunoglobulin-like domains 2                 | Lrig2             | 1.14  | 0.363 | 1.34  | 0.020 | -1.24 | 0.018 | -1.13 | 0.351 | -1.17 | 0.285 |
| 1438284_at   | oculocerebrorenal syndrome of Lowe                                     | Ocl1              | -1.42 | 0.057 | 1.1   | 0.757 | -1.24 | 0.034 | 1.05  | 0.984 | 1.14  | 0.641 |
| 1435043_at   | phospholipase C, beta 1                                                | Plcb1             | -1.48 | 0.109 | -1.79 | 0.075 | -1.24 | 0.003 | -1.15 | 0.357 | -1.25 | 0.121 |
| 1452833_at   | Rap guanine nucleotide exchange factor (GEF) 2                         | Rapgef2           | 1.09  | 0.423 | -1.19 | 0.211 | -1.24 | 0.029 | -1.62 | 0.000 | -1.51 | 0.011 |
| 1448689_at   | related RAS viral (r-ras) oncogene homolog 2                           | Rras2             | 1.06  | 0.308 | -1.18 | 0.079 | -1.24 | 0.005 | -1.24 | 0.007 | -1.4  | 0.002 |
| 1449221_a_at | ribosome binding protein 1                                             | Rrbp1             | -1.18 | 0.374 | -1.25 | 0.248 | -1.24 | 0.029 | -1.06 | 0.407 | -1.08 | 0.096 |
| 1418206_at   | stromal cell-derived factor 2-like 1                                   | Sdf2l1            | 1.21  | 0.929 | 1.11  | 0.833 | -1.24 | 0.039 | 1.06  | 0.555 | 1.02  | 0.439 |
| 1421346_a_at | solute carrier family 6 (neurotransmitter transporter, taurine), membe | Slc6a6            | 1.93  | 0.772 | 1.52  | 0.652 | -1.24 | 0.042 | -1.2  | 0.028 | -1.11 | 0.172 |
| 1431362_a_at | SPARC related modular calcium binding 2                                | Smoc2             | 1.41  | 0.597 | 1.11  | 0.633 | -1.24 | 0.021 | 1.02  | 0.454 | -1.12 | 0.136 |
| 1435878_at   | serine/threonine kinase 38 like                                        | Slk38l            | -1.07 | 0.395 | -1.35 | 0.024 | -1.24 | 0.003 | -1.29 | 0.006 | -1.11 | 0.240 |
| 1426065_a_at | tribbles homolog 3 (Drosophila)                                        | Trib3             | -1.1  | 0.389 | -1.9  | 0.069 | -1.24 | 0.018 | 1     | 0.844 | -1.03 | 0.432 |
| 1432569_at   | RIKEN cDNA 1700121K02 gene                                             | 1700121K02Rik     | 2     | 0.907 | 1.78  | 0.759 | -1.23 | 0.046 | 1.61  | 0.284 | -1.23 | 0.397 |
| 1428195_at   | RIKEN cDNA 4631427C17 gene                                             | 4631427C17Rik     | 1.23  | 0.545 | -1.08 | 0.155 | -1.23 | 0.049 | -1.22 | 0.245 | -1.03 | 0.689 |
| 1428691_at   | RIKEN cDNA 5630401D06 gene                                             | 5630401D06Rik     | -1    | 0.828 | -1.14 | 0.200 | -1.23 | 0.007 | -1.07 | 0.168 | -1.36 | 0.044 |
| 1428413_at   | RIKEN cDNA 5730405I09 gene                                             | 5730405I09Rik     | -1.18 | 0.391 | -1.33 | 0.314 | -1.23 | 0.006 | -1.3  | 0.005 | -1.15 | 0.118 |
| 1434184_s_at | RIKEN cDNA 9430080K19 gene                                             | 9430080K19Rik     | 1.1   | 0.319 | -1.13 | 0.137 | -1.23 | 0.048 | -1.31 | 0.000 | -1.35 | 0.007 |
| 1452233_at   | ATP-binding cassette, sub-family C (CFTR/MRP), member 1                | Abcc1             | -1.01 | 0.811 | -1.22 | 0.119 | -1.23 | 0.010 | -1.16 | 0.035 | -1.29 | 0.016 |

|              |                                                                     |                    |       |       |       |       |       |       |       |       |       |       |
|--------------|---------------------------------------------------------------------|--------------------|-------|-------|-------|-------|-------|-------|-------|-------|-------|-------|
| 1446108_at   | Ankyrin 2, brain                                                    | Ank2               | 1.14  | 0.891 | 1.09  | 0.971 | -1.23 | 0.032 | 1.14  | 0.542 | 1.9   | 0.199 |
| 1455083_at   | Atpase, class VI, type 11C                                          | Atp11c             | 1.06  | 0.562 | -1.34 | 0.045 | -1.23 | 0.045 | -1.17 | 0.053 | -1.19 | 0.008 |
| 1450913_at   | UDP-Gal:betaGlcNAc beta 1,4-galactosyltransferase, polypeptide 6    | B4galt6 /// LOC675 | -1.02 | 0.638 | -1.4  | 0.027 | -1.23 | 0.007 | 1     | 0.836 | -1.18 | 0.366 |
| 1441137_at   | bicaudal C homolog 1 (Drosophila)                                   | Bicc1              | 1.08  | 0.730 | -1.49 | 0.057 | -1.23 | 0.003 | -1.31 | 0.006 | -1.35 | 0.043 |
| 1421001_a_at | carbonic anhydrase 6                                                | Car6               | -1.1  | 0.450 | -1.13 | 0.318 | -1.23 | 0.043 | 1.07  | 0.664 | -1    | 0.689 |
| 1426928_at   | coiled-coil domain containing 93                                    | Ccdc93             | -1.01 | 0.726 | 1.36  | 0.074 | -1.23 | 0.005 | -1.01 | 0.926 | 1     | 0.912 |
| 1429298_at   | dimethylarginine dimethylaminohydrolase 1                           | Ddah1              | 1.2   | 0.521 | -1.09 | 0.472 | -1.23 | 0.002 | -1.03 | 0.541 | -1.25 | 0.060 |
| 1448223_at   | fatso                                                               | Fto                | -1.12 | 0.224 | -1.74 | 0.002 | -1.23 | 0.030 | -1.29 | 0.043 | -1.29 | 0.041 |
| 1433605_at   | inositol polyphosphate-5-phosphatase A                              | Inpp5a             | -1.08 | 0.409 | -1.43 | 0.015 | -1.23 | 0.000 | -1.25 | 0.001 | -1.31 | 0.021 |
| 1417379_at   | IQ motif containing GTPase activating protein 1                     | Iqgap1             | -1.09 | 0.324 | -1.35 | 0.038 | -1.23 | 0.038 | -1.19 | 0.026 | -1.17 | 0.002 |
| 1425342_a_at | potassium channel, subfamily K, member 3                            | Kcnk3              | -1.12 | 0.409 | 1.07  | 0.955 | -1.23 | 0.050 | -1.2  | 0.055 | -1    | 0.918 |
| 1455182_at   | kinesin family member 1B                                            | Kif1b              | 1.04  | 0.350 | -1.04 | 0.774 | -1.23 | 0.034 | -1.21 | 0.083 | -1.44 | 0.003 |
| 1433776_at   | lipoma HMGIC fusion partner                                         | Lhfp               | -1.01 | 0.728 | -1.35 | 0.002 | -1.23 | 0.000 | -1.22 | 0.037 | -1.29 | 0.005 |
| 1451985_at   | leucine-rich repeat kinase 1                                        | Lrrk1              | -1.11 | 0.205 | -1.23 | 0.097 | -1.23 | 0.033 | -1.15 | 0.112 | -1.29 | 0.027 |
| 1418594_a_at | nuclear receptor coactivator 1                                      | Ncoa1              | -1.11 | 0.410 | -2.39 | 0.051 | -1.23 | 0.026 | -1.24 | 0.028 | -1.63 | 0.009 |
| 1432603_at   | nuclear receptor interacting protein 1                              | Nrip1              | 1.25  | 0.051 | 1.3   | 0.338 | -1.23 | 0.039 | -1.02 | 0.745 | -1.1  | 0.489 |
| 1454862_at   | pleckstrin homology-like domain, family B, member 2                 | Phldb2             | -1.06 | 0.576 | -1.35 | 0.115 | -1.23 | 0.048 | -1.37 | 0.008 | -1.37 | 0.011 |
| 1429183_at   | plakophilin 2                                                       | Pkp2               | 1.46  | 0.386 | -1.03 | 0.478 | -1.23 | 0.037 | -1.26 | 0.029 | -1.36 | 0.003 |
| 1416525_at   | speckle-type POZ protein                                            | Spop               | 3.11  | 0.528 | 2.55  | 0.855 | -1.23 | 0.021 | -1.08 | 0.179 | -1.26 | 0.038 |
| 1423535_at   | striatin, calmodulin binding protein 3                              | Strn3              | 1.07  | 0.353 | -1.03 | 0.634 | -1.23 | 0.015 | -1.2  | 0.005 | -1.24 | 0.071 |
| 1430535_at   | TSC22 domain family 2                                               | Tsc22d2            | 1.02  | 0.986 | -1.31 | 0.060 | -1.23 | 0.021 | -1.32 | 0.000 | -1.31 | 0.000 |
| 1457598_at   | Thioredoxin-like 2                                                  | Txn12              | -1.04 | 0.688 | 1.38  | 0.081 | -1.23 | 0.019 | -1.04 | 0.705 | 1.1   | 0.297 |
| 1418479_at   | vacuolar protein sorting 54 (yeast)                                 | Vps54              | 1.05  | 0.658 | -1.17 | 0.013 | -1.23 | 0.003 | -1.2  | 0.023 | -1.35 | 0.019 |
| 1432656_at   | RIKEN cDNA 3222402N08 gene                                          | 3222402N08Rik      | 1.52  | 0.221 | 2.01  | 0.041 | -1.22 | 0.047 | 1.16  | 0.656 | 2.11  | 0.036 |
| 1428861_at   | RIKEN cDNA 4631422O05 gene /// similar to downregulated in ovari    | 4631422O05Rik ///  | 1.5   | 0.614 | 1.18  | 0.626 | -1.22 | 0.003 | -1.11 | 0.039 | -1.27 | 0.039 |
| 1453186_at   | RIKEN cDNA 5730406M06 gene                                          | 5730406M06Rik      | 2.06  | 0.444 | 1.75  | 0.317 | -1.22 | 0.030 | -1.1  | 0.332 | -1.2  | 0.043 |
| 1456658_at   | actin, alpha 2, smooth muscle, aorta                                | Acta2              | 2.03  | 0.590 | 2.06  | 0.931 | -1.22 | 0.014 | -1.12 | 0.480 | -1.75 | 0.014 |
| 1420621_a_at | amyloid beta (A4) precursor protein                                 | App                | 1.72  | 0.469 | 1.52  | 0.849 | -1.22 | 0.016 | 1.02  | 0.743 | -1.21 | 0.023 |
| 1428369_s_at | Rho GTPase activating protein 21                                    | Arhgap21           | -1.03 | 0.670 | -1.19 | 0.179 | -1.22 | 0.000 | -1.37 | 0.006 | -1.3  | 0.002 |
| 1454745_at   | Rho GTPase activating protein 29                                    | Arhgap29           | 1.03  | 0.217 | -1.1  | 0.074 | -1.22 | 0.048 | -1.21 | 0.009 | -1.3  | 0.015 |
| 1426418_at   | atonal homolog 8 (Drosophila)                                       | Atoh8              | 1.88  | 0.509 | 1.2   | 0.568 | -1.22 | 0.040 | -1.17 | 0.099 | -1.33 | 0.034 |
| 1452381_at   | cAMP responsive element binding protein 3-like 2                    | Creb3l2            | 1.01  | 0.996 | -1.42 | 0.052 | -1.22 | 0.042 | -1.2  | 0.046 | -1.43 | 0.010 |
| 1424569_at   | DEAD (Asp-Glu-Ala-Asp) box polypeptide 46                           | Ddx46              | 1.5   | 0.243 | 1.34  | 0.188 | -1.22 | 0.000 | 1.01  | 0.457 | -1.09 | 0.560 |
| 1426010_a_at | erythrocyte protein band 4.1-like 3                                 | Epb4.1l3           | 1.11  | 0.832 | -1.2  | 0.146 | -1.22 | 0.049 | -1.12 | 0.097 | -1.35 | 0.031 |
| 1425462_at   | F-box and WD-40 domain protein 11                                   | Fbxw11             | 1.09  | 0.436 | 1.08  | 0.678 | -1.22 | 0.043 | -1.3  | 0.004 | -1.27 | 0.011 |
| 1416978_at   | Fc receptor, IgG, alpha chain transporter                           | Fcgrt              | 1.24  | 0.667 | 1.24  | 0.571 | -1.22 | 0.002 | 1.04  | 0.684 | 1.06  | 0.224 |
| 1455242_at   | forkhead box P1                                                     | Foxp1              | 1.35  | 0.401 | 1.08  | 0.560 | -1.22 | 0.027 | -1.34 | 0.009 | -1.36 | 0.003 |
| 1448185_at   | homocysteine-inducible, endoplasmic reticulum stress-inducible, ubi | Herpud1            | 1.05  | 0.857 | -2.02 | 0.023 | -1.22 | 0.004 | -1.05 | 0.109 | -1.27 | 0.003 |
| 1433864_at   | low density lipoprotein-related protein 12                          | Lrp12              | 1.56  | 0.398 | 1.47  | 0.576 | -1.22 | 0.032 | -1.01 | 0.708 | -1.11 | 0.027 |
| 1455941_s_at | mitogen activated protein kinase kinase 5                           | Map2k5             | -1.32 | 0.257 | -2.33 | 0.102 | -1.22 | 0.016 | -1.45 | 0.004 | -1.31 | 0.030 |
| 1427920_at   | PHD finger protein 19                                               | Phf19              | -1.03 | 0.670 | -1.03 | 0.963 | -1.22 | 0.006 | 1.03  | 0.901 | 1.05  | 0.817 |
| 1430640_a_at | protein kinase, cAMP dependent regulatory, type II beta             | Prkar2b            | 1.08  | 0.737 | -1.2  | 0.201 | -1.22 | 0.017 | -1.03 | 0.555 | -1.26 | 0.153 |
| 1424659_at   | slit homolog 2 (Drosophila)                                         | Slit2              | -1.27 | 0.100 | -1.7  | 0.044 | -1.22 | 0.043 | -1.2  | 0.015 | -1.22 | 0.025 |
| 1424452_at   | SAFB-like, transcription modulator                                  | Sltm               | -1.04 | 0.126 | -1.22 | 0.011 | -1.22 | 0.040 | -1.06 | 0.311 | -1.39 | 0.091 |
| 1431345_a_at | TATA box binding protein (Tbp)-associated factor, RNA polymerase    | Taf1b              | 1.89  | 0.508 | 1.5   | 0.727 | -1.22 | 0.005 | -1.05 | 0.552 | -1.11 | 0.282 |
| 1452868_at   | ubiquitin specific peptidase 24                                     | Usp24              | -1    | 0.854 | -1.08 | 0.068 | -1.22 | 0.000 | -1.48 | 0.002 | -1.33 | 0.005 |
| 1419984_s_at | zinc finger protein 644                                             | Zfp644             | 1.01  | 0.879 | 1.02  | 0.735 | -1.22 | 0.007 | -1.17 | 0.263 | -1.14 | 0.209 |
| 1436842_at   | RIKEN cDNA B230380D07 gene                                          | B230380D07Rik      | -1.01 | 0.702 | -1.33 | 0.096 | -1.21 | 0.035 | 1     | 0.952 | -1    | 0.950 |
| 1436387_at   | RIKEN cDNA C330006P03 gene                                          | C330006P03Rik      | -1.14 | 0.434 | -1.19 | 0.429 | -1.21 | 0.000 | -1.05 | 0.517 | -1.03 | 0.588 |
| 1458536_at   | Cyclin I                                                            | Ccni               | 1.19  | 0.633 | 1.18  | 0.684 | -1.21 | 0.040 | -1.18 | 0.463 | -1.1  | 0.423 |
| 1420633_a_at | casein alpha s2-like A                                              | Csn1s2a            | -1.04 | 0.725 | 1.13  | 0.341 | -1.21 | 0.037 | -1.02 | 0.698 | 1.13  | 0.391 |
| 1426291_at   | DIM1 dimethyladenosine transferase 1-like (S. cerevisiae)           | Dimt1              | 1.04  | 0.960 | -1.16 | 0.312 | -1.21 | 0.039 | 1.57  | 0.022 | 1.28  | 0.166 |
| 1434038_at   | DnaJ (Hsp40) homolog, subfamily C, member 13                        | Dnajc13            | 1.02  | 0.591 | -1.2  | 0.082 | -1.21 | 0.009 | -1.14 | 0.027 | -1.27 | 0.000 |
| 1451276_at   | RIKEN cDNA E030041M21 gene                                          | E030041M21Rik      | 1.32  | 0.390 | 1.02  | 0.845 | -1.21 | 0.006 | -1.11 | 0.009 | -1.21 | 0.103 |
| 1452753_at   | forkhead box K2                                                     | Foxk2              | 1.32  | 0.641 | 1.24  | 0.571 | -1.21 | 0.023 | 1.02  | 0.725 | -1.01 | 0.839 |
| 1419372_at   | golgi SNAP receptor complex member 2                                | Gosr2              | -1.06 | 0.512 | 1.02  | 0.433 | -1.21 | 0.011 | -1.07 | 0.358 | 1.05  | 0.896 |
| 1418333_at   | metal response element binding transcription factor 1               | Mtf1               | 1.25  | 0.657 | 1.37  | 0.680 | -1.21 | 0.029 | 1.05  | 0.883 | 1.05  | 0.737 |
| 1426040_a_at | outer dense fiber of sperm tails 2                                  | Odf2               | 1.63  | 0.455 | 2.06  | 0.409 | -1.21 | 0.015 | 1.14  | 0.593 | 1.14  | 0.686 |

|              |                                                                                         |                     |       |       |       |       |       |       |       |       |       |       |
|--------------|-----------------------------------------------------------------------------------------|---------------------|-------|-------|-------|-------|-------|-------|-------|-------|-------|-------|
| 1433768_at   | palladin, cytoskeletal associated protein                                               | Palld               | 1.23  | 0.688 | -1.11 | 0.305 | -1.21 | 0.037 | -1.27 | 0.008 | -1.28 | 0.000 |
| 1438012_at   | protein phosphatase 1 (formerly 2C)-like                                                | Ppm1l               | 1.05  | 0.891 | -1.37 | 0.119 | -1.21 | 0.028 | -1.22 | 0.058 | -1.23 | 0.010 |
| 1424347_at   | protein phosphatase 6, catalytic subunit                                                | Ppp6c               | 1.02  | 0.845 | -1.11 | 0.212 | -1.21 | 0.023 | -1.18 | 0.102 | -1.33 | 0.053 |
| 1453095_at   | RAB10, member RAS oncogene family                                                       | Rab10               | 1.15  | 0.426 | -1.06 | 0.693 | -1.21 | 0.025 | -1.18 | 0.122 | -1.16 | 0.164 |
| 1454915_at   | RAB3 GTPase activating protein subunit 2                                                | Rab3gap2            | 1.09  | 0.494 | -1.24 | 0.100 | -1.21 | 0.020 | -1.12 | 0.132 | -1.22 | 0.015 |
| 1434509_at   | Rap guanine nucleotide exchange factor (GEF) 6                                          | Rapgef6             | -1.05 | 0.564 | -1.57 | 0.000 | -1.21 | 0.025 | -1.35 | 0.011 | -1.4  | 0.008 |
| 1426478_at   | RAS p21 protein activator 1                                                             | Rasa1               | 2.32  | 0.452 | 1.71  | 0.920 | -1.21 | 0.018 | -1.08 | 0.541 | -1.1  | 0.195 |
| 1455310_at   | RNA binding motif protein 16                                                            | Rbm16               | -1.08 | 0.509 | -1.24 | 0.324 | -1.21 | 0.001 | -1.26 | 0.000 | -1.25 | 0.012 |
| 1415903_at   | solute carrier family 38, member 1                                                      | Slc38a1             | 1.04  | 0.953 | -1.16 | 0.256 | -1.21 | 0.035 | -1.15 | 0.063 | -1.08 | 0.082 |
| 1422256_at   | somatostatin receptor 2                                                                 | Sstr2               | -1.06 | 0.497 | -1.84 | 0.020 | -1.21 | 0.033 | 1.13  | 0.799 | -1.45 | 0.081 |
| 1428546_at   | synaptotagmin binding, cytoplasmic RNA interacting protein                              | Syncrip             | -1.1  | 0.384 | -1.3  | 0.090 | -1.21 | 0.031 | -1.27 | 0.053 | -1.4  | 0.004 |
| 1437358_at   | WD repeat and FYVE domain containing 1                                                  | Wdly1               | 1.07  | 0.506 | -1.07 | 0.237 | -1.21 | 0.036 | -1.09 | 0.099 | -1.2  | 0.010 |
| 1423961_at   | WD repeat domain 26                                                                     | Wdr26               | 1.67  | 0.572 | 1.97  | 0.600 | -1.21 | 0.020 | 1.01  | 0.791 | -1.05 | 0.557 |
| 1449821_a_at | RIKEN cDNA 0610016J10 gene /// hypothetical LOC619602                                   | 0610016J10Rik /// I | 1.17  | 0.587 | -1.14 | 0.284 | -1.2  | 0.024 | -1.19 | 0.021 | -1.4  | 0.014 |
| 1424928_at   | RIKEN cDNA 2210018M11 gene                                                              | 2210018M11Rik       | 1.04  | 0.522 | 1.13  | 0.132 | -1.2  | 0.010 | -1.11 | 0.321 | -1.23 | 0.021 |
| 1443722_at   | RIKEN cDNA 6030419C18 gene                                                              | 6030419C18Rik       | -1.18 | 0.372 | -1.14 | 0.465 | -1.2  | 0.046 | 1.51  | 0.405 | -1.02 | 0.831 |
| 1452009_at   | RIKEN cDNA 9130422G05 gene                                                              | 9130422G05Rik       | 1.1   | 0.566 | -1.38 | 0.131 | -1.2  | 0.022 | -1.28 | 0.014 | -1.33 | 0.005 |
| 1440447_at   | abhydrolase domain containing 2                                                         | Abhd2               | 1.73  | 0.202 | 1.47  | 0.170 | -1.2  | 0.027 | -1.1  | 0.480 | -1.44 | 0.066 |
| 1429012_at   | Rac/Cdc42 guanine nucleotide exchange factor (GEF) 6                                    | Arhgef6             | 1.1   | 0.850 | -1.13 | 0.439 | -1.2  | 0.014 | 1.15  | 0.318 | 1.04  | 0.853 |
| 1434506_at   | AT rich interactive domain 2 (Arid-rfx like)                                            | Arid2               | 1.17  | 0.005 | 1.05  | 0.706 | -1.2  | 0.009 | -1.07 | 0.096 | -1.18 | 0.292 |
| 1427516_a_at | biregional cell adhesion molecule-related/down-regulated by oncogene                    | Boc                 | 1.19  | 0.092 | 1.07  | 0.493 | -1.2  | 0.043 | 1.05  | 0.650 | -1.01 | 0.650 |
| 1455287_at   | cyclin-dependent kinase 6                                                               | Cdk6                | -1.14 | 0.298 | -1.85 | 0.073 | -1.2  | 0.034 | -1.26 | 0.053 | -1.43 | 0.000 |
| 1429400_at   | chloride channel 5                                                                      | Clcn5               | -1.15 | 0.289 | -1.81 | 0.055 | -1.2  | 0.040 | -1.2  | 0.133 | -1.17 | 0.030 |
| 1457176_at   | GTPase activating RANGAP domain-like 1                                                  | Garnl1              | 1.67  | 0.040 | 1.42  | 0.244 | -1.2  | 0.001 | -1.21 | 0.063 | -1.78 | 0.029 |
| 1450730_at   | heparan sulfate 2-O-sulfotransferase 1                                                  | Hs2st1              | 1.03  | 0.695 | -1.27 | 0.006 | -1.2  | 0.003 | -1.04 | 0.474 | -1.27 | 0.007 |
| 1436897_at   | malignant fibrous histiocytoma amplified sequence 1                                     | Mfhas1              | -1.04 | 0.543 | -1.09 | 0.321 | -1.2  | 0.015 | -1.09 | 0.172 | -1.05 | 0.527 |
| 1422567_at   | niban protein                                                                           | Niban               | 1.18  | 0.643 | -1.11 | 0.344 | -1.2  | 0.023 | -1.09 | 0.098 | -1.22 | 0.046 |
| 1435088_at   | nuclear receptor-binding SET-domain protein 1                                           | Nsd1                | 1.06  | 0.489 | -1.03 | 0.331 | -1.2  | 0.000 | -1.1  | 0.175 | -1.22 | 0.152 |
| 1426456_a_at | protein inhibitor of activated STAT 2                                                   | Pias2               | 1.18  | 0.352 | -1.01 | 0.695 | -1.2  | 0.011 | -1.19 | 0.021 | -1.34 | 0.031 |
| 1451179_a_at | quaking                                                                                 | Qk                  | -1.04 | 0.550 | -1.36 | 0.003 | -1.2  | 0.001 | -1.27 | 0.004 | -1.26 | 0.001 |
| 1426912_at   | ring finger and WD repeat domain 2 /// similar to constitutive photom Rfwd2 /// LOC6212 | Rfwd2 /// LOC6212   | 1.22  | 0.333 | 1.05  | 0.966 | -1.2  | 0.018 | -1.17 | 0.014 | -1.28 | 0.004 |
| 1417209_at   | SERTA domain containing 2                                                               | Sertad2             | 1.23  | 0.151 | 1.13  | 0.672 | -1.2  | 0.015 | -1.02 | 0.517 | -1.15 | 0.117 |
| 1422893_at   | Scm-like with four mbt domains 1                                                        | Sfmbt1              | -1.13 | 0.196 | 1.01  | 0.889 | -1.2  | 0.038 | -1.24 | 0.073 | 1.04  | 0.812 |
| 1434261_at   | signal-induced proliferation-associated 1 like 2                                        | Sipa1l2             | 1.02  | 0.688 | -1.38 | 0.041 | -1.2  | 0.014 | -1.32 | 0.011 | -1.47 | 0.002 |
| 1454960_at   | MAD homolog 3 (Drosophila)                                                              | Smad3               | -1.12 | 0.305 | -1.38 | 0.010 | -1.2  | 0.031 | -1.16 | 0.081 | -1.22 | 0.092 |
| 1433664_at   | ubiquitin-conjugating enzyme E2Q (putative) 2                                           | Ube2q2              | 1.98  | 0.594 | 1.58  | 0.921 | -1.2  | 0.022 | -1.02 | 0.561 | 1.02  | 0.829 |
| 1427163_at   | ubiquitin protein ligase E3 component n-recogin 2                                       | Ubr2                | 1.24  | 0.436 | 1.21  | 0.306 | -1.2  | 0.049 | -1.15 | 0.012 | -1.31 | 0.011 |
| 1428194_at   | ubiquitin specific peptidase 9, X chromosome                                            | Usp9x               | 1.07  | 0.266 | -1.27 | 0.111 | -1.2  | 0.026 | -1.15 | 0.024 | -1.36 | 0.048 |
| 1457674_at   | vacuolar protein sorting 13A (yeast)                                                    | Vps13a              | -1.08 | 0.473 | -1.24 | 0.186 | -1.2  | 0.048 | 1.23  | 0.189 | -1.02 | 0.923 |
| 1458255_at   | WD repeat domain 33                                                                     | Wdr33               | -1.18 | 0.372 | 1.36  | 0.479 | -1.2  | 0.002 | 1.85  | 0.848 | 1.05  | 0.775 |
| 1428370_at   | RIKEN cDNA 1500011B03 gene                                                              | 1500011B03Rik       | 1.81  | 0.975 | 1.92  | 0.947 | 1.2   | 0.023 | 1.45  | 0.005 | 1.26  | 0.196 |
| 1423823_at   | RIKEN cDNA 2610012O22 gene                                                              | 2610012O22Rik       | 1.01  | 0.747 | 1.22  | 0.005 | 1.2   | 0.049 | 1.12  | 0.030 | 1.14  | 0.184 |
| 1454702_at   | RIKEN cDNA 4930503L19 gene                                                              | 4930503L19Rik       | 1.61  | 0.371 | 1.79  | 0.164 | 1.2   | 0.037 | 1.27  | 0.082 | 1.08  | 0.839 |
| 1441960_x_at | RIKEN cDNA 5730494M16 gene                                                              | 5730494M16Rik       | -1.11 | 0.447 | -1.09 | 0.467 | 1.2   | 0.001 | 1.01  | 0.758 | 1.21  | 0.000 |
| 1453062_at   | RIKEN cDNA A930026I22 gene                                                              | A930026I22Rik       | -1.19 | 0.371 | 1.03  | 0.917 | 1.2   | 0.017 | 1.32  | 0.758 | -1.08 | 0.607 |
| 1448318_at   | adipose differentiation related protein                                                 | Adfp                | -1    | 0.917 | 1.22  | 0.056 | 1.2   | 0.034 | 1.14  | 0.108 | 1.23  | 0.002 |
| 1447903_x_at | adaptor-related protein complex 1, sigma 2 subunit                                      | Ap1s2               | -1.09 | 0.473 | 1.11  | 0.762 | 1.2   | 0.015 | 1.19  | 0.028 | 1.22  | 0.041 |
| 1434711_at   | cDNA sequence BC030867                                                                  | BC030867            | 1.07  | 0.755 | 1.2   | 0.142 | 1.2   | 0.003 | 1.19  | 0.038 | 1.25  | 0.015 |
| 1429561_at   | BRF2, subunit of RNA polymerase III transcription initiation factor, B Brf2             | Brf2                | -1.07 | 0.448 | 1.24  | 0.642 | 1.2   | 0.039 | 1.16  | 0.023 | 1.25  | 0.004 |
| 1428490_at   | core 1 UDP-galactose-N-acetylgalactosamine-alpha-R beta 1,3-gala                        | C1gal1              | 1.14  | 0.264 | 1.17  | 0.174 | 1.2   | 0.049 | 1.17  | 0.284 | 1.3   | 0.049 |
| 1426886_at   | ceroid-lipofuscinosis, neuronal 5                                                       | Cln5                | 1.65  | 0.194 | 1.86  | 0.160 | 1.2   | 0.015 | 1.1   | 0.210 | 1.24  | 0.012 |
| 1460409_at   | carnitine palmitoyltransferase 1a, liver                                                | Cpt1a               | 1     | 0.977 | -1.23 | 0.062 | 1.2   | 0.001 | 1     | 0.931 | 1.07  | 0.349 |
| 1428738_a_at | DNA segment, Chr 14, ERATO Doi 449, expressed                                           | D14Erd449e          | 2.23  | 0.396 | 2.54  | 0.557 | 1.2   | 0.025 | 1.02  | 0.560 | 1.06  | 0.385 |
| 1424697_at   | DTW domain containing 1                                                                 | Dtwd1               | 1.06  | 0.013 | 1.13  | 0.124 | 1.2   | 0.024 | 1.06  | 0.049 | 1.25  | 0.025 |
| 1422539_at   | exotoses (multiple)-like 2                                                              | Extl2               | 1.18  | 0.167 | 1.17  | 0.157 | 1.2   | 0.014 | 1.13  | 0.073 | 1.12  | 0.123 |
| 1449528_at   | c-fos induced growth factor                                                             | Figf                | -1.1  | 0.272 | 1.04  | 0.822 | 1.2   | 0.008 | -1.11 | 0.917 | 1.24  | 0.134 |
| 1424300_at   | gem (nuclear organelle) associated protein 6                                            | Gemin6              | 1.19  | 0.010 | 1.32  | 0.005 | 1.2   | 0.030 | 1.3   | 0.003 | 1.16  | 0.027 |
| 1429356_s_at | geranylgeranyl diphosphate synthase 1                                                   | Gggs1               | 1.34  | 0.206 | 1.61  | 0.127 | 1.2   | 0.001 | 1.16  | 0.053 | 1.07  | 0.447 |

|              |                                                                          |                     |       |       |       |       |      |       |       |       |       |       |
|--------------|--------------------------------------------------------------------------|---------------------|-------|-------|-------|-------|------|-------|-------|-------|-------|-------|
| 1450881_s_at | G protein-coupled receptor 137B                                          | Gpr137b             | -1.03 | 0.641 | -1.18 | 0.275 | 1.2  | 0.011 | 1.08  | 0.137 | 1.09  | 0.141 |
| 1456229_at   | homeo box B3                                                             | Hoxb3               | -1.04 | 0.117 | 1.2   | 0.053 | 1.2  | 0.014 | -1.01 | 0.722 | 1.22  | 0.270 |
| 1458404_at   | NADH dehydrogenase (ubiquinone) 1 beta subcomplex 8                      | Ndufb8              | -1.13 | 0.397 | 1.41  | 0.844 | 1.2  | 0.031 | 1.18  | 0.579 | 1.32  | 0.228 |
| 1420142_s_at | proliferation-associated 2G4                                             | Pa2g4               | -1.11 | 0.432 | 1.22  | 0.992 | 1.2  | 0.009 | 1.12  | 0.053 | 1.31  | 0.034 |
| 1418893_at   | pre B-cell leukemia transcription factor 2                               | Pbx2                | -1.3  | 0.104 | -1.05 | 0.560 | 1.2  | 0.008 | 1.01  | 0.877 | 1.05  | 0.583 |
| 1424120_at   | ring finger protein 8                                                    | Rnf8                | -1.07 | 0.473 | 1.12  | 0.854 | 1.2  | 0.017 | 1.07  | 0.383 | 1.03  | 0.881 |
| 1415725_at   | RRN3 RNA polymerase I transcription factor homolog (yeast)               | Rrn3                | 1.1   | 0.373 | 1.19  | 0.107 | 1.2  | 0.013 | -1.02 | 0.494 | 1.08  | 0.106 |
| 1448778_at   | splicing factor, arginine/serine-rich 4 (SRp75)                          | Sfrs4               | -1.11 | 0.262 | 1.1   | 0.461 | 1.2  | 0.028 | 1.15  | 0.067 | 1.1   | 0.320 |
| 1440598_at   | syntrophin, gamma 1                                                      | Sntg1               | 1.26  | 0.949 | -1.7  | 0.141 | 1.2  | 0.014 | 2.59  | 0.013 | 1.94  | 0.517 |
| 1429711_at   | phosphoserine/threonine/tyrosine interaction protein                     | Styx                | 1.01  | 0.604 | -1.16 | 0.383 | 1.2  | 0.050 | 1.11  | 0.201 | 1.09  | 0.241 |
| 1436826_at   | transmembrane and tetra-tryptophan repeat containing 3                   | Tmtc3               | 1.02  | 0.892 | 1.08  | 0.818 | 1.2  | 0.019 | 1.05  | 0.387 | 1.09  | 0.278 |
| 1442454_at   | topoisomerase (DNA) II alpha                                             | Top2a               | 1.11  | 0.774 | 1.02  | 0.805 | 1.2  | 0.009 | 1.2   | 0.294 | -1.29 | 0.110 |
| 1448848_at   | torsin family 1, member B                                                | Tor1b               | -1.04 | 0.601 | 1.12  | 0.832 | 1.2  | 0.000 | 1.06  | 0.142 | 1.14  | 0.177 |
| 1423395_at   | translin-associated factor X                                             | Tsnax               | 1.02  | 0.992 | 1.17  | 0.423 | 1.2  | 0.046 | 1.14  | 0.082 | 1.03  | 0.720 |
| 1451754_a_at | WD repeat domain 45                                                      | Wdr45               | 1.2   | 0.208 | 1.26  | 0.559 | 1.2  | 0.011 | 1.11  | 0.119 | 1.05  | 0.819 |
| 1426879_at   | RIKEN cDNA 1190005F20 gene                                               | 1190005F20Rik       | 1.13  | 0.410 | 1.35  | 0.034 | 1.21 | 0.034 | 1.08  | 0.425 | 1.14  | 0.323 |
| 1423118_at   | RIKEN cDNA 1200014J11 gene                                               | 1200014J11Rik       | -1.1  | 0.069 | 1.22  | 0.105 | 1.21 | 0.032 | 1.08  | 0.163 | -1    | 0.827 |
| 1454879_s_at | RIKEN cDNA 1700052N19 gene                                               | 1700052N19Rik       | 1.21  | 0.568 | 1.44  | 0.382 | 1.21 | 0.026 | 1.15  | 0.057 | 1.17  | 0.031 |
| 1428552_at   | RIKEN cDNA 2610001J05 gene                                               | 2610001J05Rik       | -1.06 | 0.521 | 1.04  | 0.972 | 1.21 | 0.017 | -1.08 | 0.098 | 1.18  | 0.025 |
| 1430614_at   | RIKEN cDNA 4632415K11 gene                                               | 4632415K11Rik       | 1.23  | 0.398 | 1.31  | 0.294 | 1.21 | 0.003 | 1     | 0.989 | 1.15  | 0.011 |
| 1422628_at   | RIKEN cDNA 4632417K18 gene                                               | 4632417K18Rik       | 1.29  | 0.065 | 1.66  | 0.013 | 1.21 | 0.004 | 1.27  | 0.002 | 1.23  | 0.018 |
| 1428821_at   | 1-acylglycerol-3-phosphate O-acyltransferase 2 (lysophosphatidic ac      | Agpat2              | 1.51  | 0.249 | 1.8   | 0.047 | 1.21 | 0.012 | 1.18  | 0.042 | 1.26  | 0.006 |
| 1425482_s_at | ankyrin repeat and MYND domain containing 2                              | Ankmy2              | 1.1   | 0.741 | 1.06  | 0.924 | 1.21 | 0.039 | -1.07 | 0.387 | -1.09 | 0.415 |
| 1417970_at   | ATP synthase, H+ transporting, mitochondrial F0 complex, subunit s       | Atp5s               | -1.05 | 0.592 | 1.01  | 0.992 | 1.21 | 0.042 | -1.06 | 0.236 | 1.09  | 0.316 |
| 1442005_at   | expressed sequence AW987390                                              | AW987390            | 1.61  | 0.534 | 1.56  | 0.834 | 1.21 | 0.025 | 1.07  | 0.912 | 1.19  | 0.000 |
| 1452902_at   | dehydrogenase/reductase (SDR family) member 13                           | Dhrs13              | 1.04  | 0.700 | 1.48  | 0.008 | 1.21 | 0.043 | 1.31  | 0.137 | 1.26  | 0.201 |
| 1448877_at   | distal-less homeobox 2                                                   | Dlx2                | -1.03 | 0.505 | -1.13 | 0.204 | 1.21 | 0.003 | -1.09 | 0.349 | -1.02 | 0.671 |
| 1452797_at   | FAST kinase domains 3                                                    | Fastkd3             | 1.14  | 0.345 | 1.49  | 0.007 | 1.21 | 0.005 | 1.2   | 0.009 | 1.02  | 0.430 |
| 1435866_s_at | histone 3, H2a                                                           | Hist3h2a            | -1.05 | 0.609 | 1.21  | 0.041 | 1.21 | 0.013 | 1.28  | 0.008 | 1.25  | 0.005 |
| 1457292_at   | Josephin domain containing 3                                             | Josd3               | -1.18 | 0.399 | -1.22 | 0.377 | 1.21 | 0.030 | 1.13  | 0.399 | 1.09  | 0.904 |
| 1439530_a_at | similar to Nfkb interacting protein 1                                    | LOC669005           | -1.04 | 0.601 | 1.16  | 0.527 | 1.21 | 0.038 | 1.01  | 0.844 | 1.18  | 0.224 |
| 1451490_at   | lysophospholipase-like 1                                                 | Lyplal1             | -1.2  | 0.084 | -1.57 | 0.071 | 1.21 | 0.023 | 1.05  | 0.456 | 1.19  | 0.356 |
| 1435447_at   | major intrinsic protein of eye lens fiber                                | Mip                 | 1.55  | 0.569 | 1.39  | 0.817 | 1.21 | 0.001 | 1.24  | 0.257 | 1.59  | 0.543 |
| 1430530_s_at | NmrA-like family domain containing 1                                     | Nmral1              | 1.2   | 0.866 | 1.35  | 0.084 | 1.21 | 0.047 | 1.04  | 0.475 | 1.19  | 0.069 |
| 1460001_at   | pyroglutamyl-peptidase I                                                 | Pgpep1              | -1.25 | 0.251 | 1.09  | 0.975 | 1.21 | 0.033 | -1.04 | 0.533 | 1.12  | 0.343 |
| 1416530_a_at | purine-nucleoside phosphorylase                                          | Pnp                 | 1.1   | 0.233 | 1.44  | 0.035 | 1.21 | 0.003 | 1.17  | 0.006 | 1.26  | 0.058 |
| 1451519_at   | ring finger protein 2                                                    | Rnf2                | 1.1   | 0.539 | 1.23  | 0.228 | 1.21 | 0.037 | 1.09  | 0.368 | -1.06 | 0.255 |
| 1423666_s_at | ribosomal protein L5 /// similar to 60S ribosomal protein L5 /// similar | Rpl5 /// LOC38274C  | -1.1  | 0.256 | 1.27  | 0.032 | 1.21 | 0.047 | 1.38  | 0.002 | 1.31  | 0.063 |
| 1459657_s_at | RNA polymerase 1-3                                                       | Rpo1-3              | -1.13 | 0.293 | -1.03 | 0.616 | 1.21 | 0.010 | 1     | 0.923 | -1    | 0.837 |
| 1450129_a_at | suppressor of cytokine signaling 6                                       | Socs6               | 1.3   | 0.397 | 1.43  | 0.089 | 1.21 | 0.021 | 1.09  | 0.170 | 1.06  | 0.109 |
| 1442590_at   | tumor necrosis factor receptor superfamily, member 23                    | Tnfrsf23            | 1.43  | 0.672 | 1.47  | 0.352 | 1.21 | 0.015 | 1.05  | 0.121 | 1.16  | 0.076 |
| 1460642_at   | Tnf receptor associated factor 4                                         | Traf4               | 1.67  | 0.344 | 2.39  | 0.029 | 1.21 | 0.005 | 1.43  | 0.079 | 1.48  | 0.090 |
| 1437151_at   | ubiquitin specific peptidase 22                                          | Usp22               | 2.45  | 0.353 | 2.89  | 0.239 | 1.21 | 0.003 | 1.12  | 0.029 | 1.14  | 0.033 |
| 1427120_at   | zinc finger protein 26                                                   | Zfp26               | -1.03 | 0.657 | -1.02 | 0.676 | 1.21 | 0.011 | 1.15  | 0.025 | 1.06  | 0.156 |
| 1452268_at   | RIKEN cDNA 2810485I05 gene                                               | 2810485I05Rik       | 2.47  | 0.226 | 2.27  | 0.362 | 1.22 | 0.018 | 1.37  | 0.007 | 1.09  | 0.340 |
| 1434567_at   | RIKEN cDNA 4732496O08 gene                                               | 4732496O08Rik       | -1.02 | 0.654 | 1.39  | 0.009 | 1.22 | 0.043 | 1.12  | 0.085 | 1.19  | 0.043 |
| 1435745_at   | RIKEN cDNA 5031439G07 gene                                               | 5031439G07Rik       | -1.07 | 0.481 | -1.01 | 0.643 | 1.22 | 0.021 | 1.11  | 0.064 | 1.23  | 0.128 |
| 1452203_at   | RIKEN cDNA 5830411E10 gene                                               | 5830411E10Rik       | 1.21  | 0.393 | 1.62  | 0.053 | 1.22 | 0.043 | 1.05  | 0.412 | 1.1   | 0.262 |
| 1454644_at   | RIKEN cDNA 6330569M22 gene                                               | 6330569M22Rik       | 1.01  | 0.893 | 1.05  | 0.589 | 1.22 | 0.028 | 1.18  | 0.013 | 1.14  | 0.058 |
| 1448431_at   | ankyrin repeat and SOCS box-containing protein 6                         | Asb6                | -1.02 | 0.430 | 1.32  | 0.669 | 1.22 | 0.026 | 1     | 0.956 | 1.17  | 0.272 |
| 1426883_at   | expressed sequence AW491445                                              | AW491445            | 1.1   | 0.877 | 1.06  | 0.959 | 1.22 | 0.014 | 1.24  | 0.232 | -1.23 | 0.099 |
| 1452039_a_at | Brca1 associated protein 1                                               | Bap1                | -1.19 | 0.363 | 1.03  | 0.713 | 1.22 | 0.008 | 1.03  | 0.352 | 1.18  | 0.127 |
| 1415975_at   | calcium regulated heat stable protein 1                                  | Carhsp1             | 1.61  | 0.152 | 1.91  | 0.034 | 1.22 | 0.024 | 1.17  | 0.056 | 1.29  | 0.008 |
| 1448205_at   | cyclin B1, related sequence 1 /// cyclin B1                              | Ccnb1-rs1 /// Ccnb1 | 1.1   | 0.384 | -1.12 | 0.073 | 1.22 | 0.003 | 1.07  | 0.246 | -1    | 0.881 |
| 1424528_at   | cell growth regulator with EF hand domain 1                              | Cgref1              | 1.14  | 0.577 | 1.64  | 0.001 | 1.22 | 0.024 | 1.13  | 0.280 | 1.16  | 0.020 |
| 1454679_at   | DNA segment, Chr 8, ERATO Doi 457, expressed                             | D8Ert0457e          | -1.06 | 0.440 | 1.22  | 0.092 | 1.22 | 0.022 | 1.19  | 0.013 | 1.13  | 0.092 |
| 1452796_at   | differentially expressed in FDCP 6                                       | Def6                | 1.45  | 0.151 | 1.87  | 0.024 | 1.22 | 0.002 | 1.24  | 0.012 | 1.4   | 0.012 |
| 1449940_a_at | eukaryotic translation initiation factor 2B, subunit 4 delta             | Eif2b4              | -1.01 | 0.692 | 1.13  | 0.480 | 1.22 | 0.018 | 1.14  | 0.329 | 1.16  | 0.011 |

|              |                                                                   |               |       |       |       |       |      |       |       |       |       |       |
|--------------|-------------------------------------------------------------------|---------------|-------|-------|-------|-------|------|-------|-------|-------|-------|-------|
| 1455904_at   | growth arrest specific 5                                          | Gas5          | 1.01  | 0.711 | -1.03 | 0.544 | 1.22 | 0.002 | 1.23  | 0.038 | 1.1   | 0.140 |
| 1449746_s_at | GLI pathogenesis-related 1 (glioma)                               | Glipr1        | -1.05 | 0.474 | 1.2   | 0.631 | 1.22 | 0.006 | -1.12 | 0.559 | 1.7   | 0.065 |
| 1425201_a_at | hydroxypyruvate isomerase homolog (E. coli)                       | Hyi           | 1.1   | 0.913 | 1.1   | 0.958 | 1.22 | 0.013 | 1.05  | 0.852 | 1.1   | 0.242 |
| 1416324_s_at | potassium channel tetramerisation domain containing 20            | Kctd20        | -1.21 | 0.324 | 1.15  | 0.888 | 1.22 | 0.048 | 1.12  | 0.169 | 1.05  | 0.051 |
| 1418192_at   | max binding protein                                               | Mnt           | -1.02 | 0.402 | 1.17  | 0.496 | 1.22 | 0.029 | 1.54  | 0.220 | 1.11  | 0.753 |
| 1417571_at   | N-methylpurine-DNA glycosylase                                    | Mpg           | 1.11  | 0.698 | 1.27  | 0.179 | 1.22 | 0.029 | 1.08  | 0.299 | 1.38  | 0.139 |
| 1437834_s_at | protein kinase C and casein kinase substrate in neurons 3         | Pacsin3       | -1.03 | 0.510 | 1.01  | 0.554 | 1.22 | 0.025 | 1.14  | 0.201 | 1.4   | 0.008 |
| 1451624_a_at | phosphatase, orphan 2                                             | Phospho2      | 1.03  | 0.988 | 1.39  | 0.251 | 1.22 | 0.020 | 1.35  | 0.028 | 1.63  | 0.029 |
| 1418369_at   | DNA primase, p49 subunit                                          | Prim1         | 1.28  | 0.071 | 1.58  | 0.040 | 1.22 | 0.017 | 1.13  | 0.095 | 1.07  | 0.325 |
| 1417323_at   | proline/serine-rich coiled-coil 1                                 | Psrc1         | 1.09  | 0.506 | 1.46  | 0.007 | 1.22 | 0.004 | 1.16  | 0.006 | 1.24  | 0.009 |
| 1455438_at   | peroxisomal membrane protein 4                                    | Pxmp4         | -1.05 | 0.513 | -1.29 | 0.324 | 1.22 | 0.012 | 1.08  | 0.674 | 1.4   | 0.060 |
| 1426965_at   | RAS related protein 2a                                            | Rap2a         | -1.03 | 0.529 | 1.23  | 0.019 | 1.22 | 0.040 | 1.17  | 0.048 | 1.38  | 0.008 |
| 1424156_at   | retinoblastoma-like 1 (p107)                                      | Rbl1          | 1.38  | 0.021 | 1.43  | 0.000 | 1.22 | 0.035 | 1.08  | 0.197 | 1.29  | 0.032 |
| 1428342_at   | REST corepressor 3                                                | Rcor3         | 1.16  | 0.335 | 1.26  | 0.137 | 1.22 | 0.038 | 1.11  | 0.124 | 1.12  | 0.333 |
| 1455265_a_at | regulator of G-protein signaling 16                               | Rgs16         | -1.24 | 0.285 | -1.28 | 0.160 | 1.22 | 0.029 | -1.13 | 0.105 | 1.14  | 0.383 |
| 1423312_at   | trophoblast glycoprotein                                          | Tpbg          | -1.08 | 0.469 | 1.01  | 0.869 | 1.22 | 0.015 | -1.1  | 0.246 | 1.15  | 0.105 |
| 1455268_at   | zinc finger, CSL domain containing 2                              | Zcsl2         | 1.11  | 0.191 | 1.4   | 0.003 | 1.22 | 0.046 | 1.17  | 0.168 | 1.32  | 0.018 |
| 1452880_at   | zinc finger, HIT type 3                                           | Znhit3        | 1.19  | 0.211 | 1.43  | 0.003 | 1.22 | 0.043 | 1.1   | 0.274 | 1.21  | 0.017 |
| 1455135_at   | RIKEN cDNA 2610014116 gene                                        | 2610014116Rik | -1.12 | 0.317 | -1.08 | 0.485 | 1.23 | 0.003 | 1.1   | 0.139 | 1.11  | 0.176 |
| 1429421_at   | RIKEN cDNA 2610203E10 gene                                        | 2610203E10Rik | -1.19 | 0.377 | -1.16 | 0.321 | 1.23 | 0.008 | 1.3   | 0.192 | 1.22  | 0.628 |
| 1453846_at   | RIKEN cDNA 2810013C04 gene                                        | 2810013C04Rik | 1.01  | 0.880 | -1.06 | 0.654 | 1.23 | 0.004 | 1.04  | 0.739 | 1.59  | 0.336 |
| 1417218_at   | RIKEN cDNA 2810048G17 gene                                        | 2810048G17Rik | 1.1   | 0.459 | 1.22  | 0.180 | 1.23 | 0.047 | 1.2   | 0.004 | 1.12  | 0.000 |
| 1427167_at   | expressed sequence AI448196                                       | AI448196      | 1.22  | 0.321 | 1.32  | 0.185 | 1.23 | 0.022 | 1.47  | 0.043 | 1.44  | 0.057 |
| 1449019_at   | A kinase (PRKA) anchor protein 1                                  | Akap1         | 1.11  | 0.231 | 1.46  | 0.005 | 1.23 | 0.027 | 1.15  | 0.044 | 1.16  | 0.135 |
| 1449174_at   | ADP-ribosyltransferase 4                                          | Art4          | 2.01  | 0.517 | 1.45  | 0.821 | 1.23 | 0.007 | 1.56  | 0.201 | 1.47  | 0.211 |
| 1440831_at   | BTB and CNC homology 1                                            | Bach1         | -1.05 | 0.574 | 1.13  | 0.939 | 1.23 | 0.042 | 1.12  | 0.099 | 1.27  | 0.014 |
| 1441989_at   | BCL2/adenovirus E1B interacting protein 1, NIP2                   | Bnip2         | -1.07 | 0.612 | 1.23  | 0.003 | 1.23 | 0.018 | 1.18  | 0.382 | -1.09 | 0.704 |
| 1435406_at   | coiled-coil alpha-helical rod protein 1                           | Cchcr1        | 1.12  | 0.375 | 1.36  | 0.020 | 1.23 | 0.009 | 1.02  | 0.842 | -1.05 | 0.464 |
| 1436914_at   | CTD (carboxy-terminal domain, RNA polymerase II, polypeptide A) s | Ctdspl2       | 4.38  | 0.177 | 4.09  | 0.233 | 1.23 | 0.036 | 1.18  | 0.060 | 1.15  | 0.347 |
| 1418456_a_at | chemokine (C-X-C motif) ligand 14                                 | Cxcl14        | -1.05 | 0.601 | 1.01  | 0.965 | 1.23 | 0.042 | 1.11  | 0.107 | 1.34  | 0.105 |
| 1440478_at   | DNA segment, Chr 10, ERATO Doi 438, expressed                     | D10Ert438e    | 1.16  | 0.380 | 1.3   | 0.005 | 1.23 | 0.032 | 1.22  | 0.329 | -1.06 | 0.623 |
| 1435926_at   | RIKEN cDNA E030003F13 gene                                        | E030003F13Rik | -1.03 | 0.574 | 1.4   | 0.017 | 1.23 | 0.022 | 1.27  | 0.028 | 1.29  | 0.047 |
| 1455514_at   | potassium voltage-gated channel, Shal-related family, member 1    | Kcnd1         | 1.31  | 0.947 | 1.11  | 0.652 | 1.23 | 0.029 | 1.26  | 0.280 | 1.25  | 0.478 |
| 1439261_x_at | MIT, microtubule interacting and transport, domain containing 1   | Mitd1         | -1.49 | 0.214 | 1.12  | 0.854 | 1.23 | 0.001 | 1.22  | 0.212 | 1.08  | 0.910 |
| 1436993_x_at | profilin 2                                                        | Pfn2          | -1.14 | 0.421 | 1.08  | 0.918 | 1.23 | 0.022 | 1.06  | 0.220 | 1.16  | 0.050 |
| 1417166_at   | PC4 and SFRS1 interacting protein 1                               | Psip1         | 1.04  | 0.933 | 1.06  | 0.731 | 1.23 | 0.014 | 1.26  | 0.035 | 1.27  | 0.027 |
| 1417035_at   | SAC3 domain containing 1                                          | Sac3d1        | 1.04  | 0.715 | 1.36  | 0.026 | 1.23 | 0.034 | 1.23  | 0.023 | 1.28  | 0.048 |
| 1417888_at   | tripartite motif protein 13                                       | Trim13        | 1.5   | 0.063 | 1.64  | 0.054 | 1.23 | 0.001 | 1.14  | 0.255 | 1.32  | 0.006 |
| 1429393_at   | WD repeat domain 40A                                              | Wdr40a        | 1.4   | 0.479 | 1.9   | 0.083 | 1.23 | 0.013 | 1.24  | 0.006 | 1.19  | 0.047 |
| 1451302_at   | RIKEN cDNA 1110012L19 gene                                        | 1110012L19Rik | 1.24  | 0.261 | 1.58  | 0.011 | 1.24 | 0.028 | 1.19  | 0.013 | 1.2   | 0.054 |
| 1428675_at   | RIKEN cDNA 1110049F12 gene                                        | 1110049F12Rik | 1.02  | 0.878 | 1.22  | 0.092 | 1.24 | 0.021 | 1.08  | 0.378 | 1.22  | 0.041 |
| 1438429_at   | RIKEN cDNA 2610319H10 gene                                        | 2610319H10Rik | -1.14 | 0.349 | 1.13  | 0.456 | 1.24 | 0.040 | 1.35  | 0.113 | 1.23  | 0.159 |
| 1454563_at   | RIKEN cDNA 4930573C08 gene                                        | 4930573C08Rik | -1.35 | 0.215 | -1.58 | 0.004 | 1.24 | 0.032 | -1.37 | 0.313 | 2.13  | 0.008 |
| 1432221_at   | RIKEN cDNA 5330417H12 gene                                        | 5330417H12Rik | 1.03  | 0.227 | -1.45 | 0.375 | 1.24 | 0.033 | 1.4   | 0.453 | 1.24  | 0.757 |
| 1453210_at   | RIKEN cDNA 5730507C01 gene                                        | 5730507C01Rik | -1.05 | 0.702 | 1.54  | 0.134 | 1.24 | 0.001 | 1.17  | 0.019 | 2.38  | 0.098 |
| 1434659_at   | RIKEN cDNA 5830411G16 gene                                        | 5830411G16Rik | -1.15 | 0.270 | 1.18  | 0.084 | 1.24 | 0.030 | -1.07 | 0.461 | 1.01  | 0.970 |
| 1426748_s_at | ATP-binding cassette, sub-family F (GCN20), member 3              | Abcf3         | -1.04 | 0.471 | 1.02  | 0.510 | 1.24 | 0.045 | 1.04  | 0.652 | 1.1   | 0.144 |
| 1416408_at   | acyl-Coenzyme A oxidase 1, palmitoyl                              | Acox1         | -1.12 | 0.261 | 1     | 0.670 | 1.24 | 0.012 | -1.03 | 0.707 | 1.13  | 0.136 |
| 1434729_at   | cDNA sequence AK129302                                            | AK129302      | 1.23  | 0.173 | 1.09  | 0.679 | 1.24 | 0.043 | 1.08  | 0.411 | 1.19  | 0.012 |
| 1418585_at   | cyclin H                                                          | Cnh           | 1.28  | 0.019 | 1.26  | 0.143 | 1.24 | 0.037 | 1.16  | 0.189 | 1.4   | 0.048 |
| 1448835_at   | E2F transcription factor 6                                        | E2f6          | 1.57  | 0.285 | 1.8   | 0.190 | 1.24 | 0.034 | 1.19  | 0.020 | 1.17  | 0.046 |
| 1433622_at   | gem (nuclear organelle) associated protein 4                      | Gemin4        | 1.82  | 0.236 | 2.11  | 0.013 | 1.24 | 0.013 | 1.35  | 0.009 | 1.39  | 0.005 |
| 1433650_at   | hydroxyacylglutathione hydrolase-like                             | Haghl         | -1.43 | 0.148 | -2.05 | 0.062 | 1.24 | 0.041 | -1.03 | 0.546 | -1.23 | 0.316 |
| 1437226_x_at | MARCKS-like 1                                                     | Marcks1       | 1.07  | 0.012 | 1.46  | 0.000 | 1.24 | 0.000 | 1.22  | 0.019 | 1.28  | 0.076 |
| 1423218_a_at | mitochondrial ribosomal protein L49                               | Mrpl49        | 1.31  | 0.017 | 1.85  | 0.007 | 1.24 | 0.006 | 1.36  | 0.009 | 1.29  | 0.096 |
| 1417689_a_at | PDZK1 interacting protein 1                                       | Pdzk1ip1      | -1.47 | 0.301 | -1.61 | 0.220 | 1.24 | 0.008 | 1.34  | 0.596 | 1.43  | 0.470 |
| 1440965_at   | Phosphatidylinositol glycan, class L                              | Pigl          | 1.09  | 0.989 | 1.16  | 0.572 | 1.24 | 0.040 | 1.34  | 0.006 | 1.06  | 0.022 |
| 1453623_a_at | RAD23a homolog (S. cerevisiae)                                    | Rad23a        | 2.58  | 0.265 | 2.11  | 0.046 | 1.24 | 0.028 | 1.08  | 0.550 | 1.16  | 0.173 |

|              |                                                                           |                   |       |       |       |       |      |       |       |       |       |       |
|--------------|---------------------------------------------------------------------------|-------------------|-------|-------|-------|-------|------|-------|-------|-------|-------|-------|
| 1455584_at   | stromal cell derived factor 4                                             | Sdf4              | -1.14 | 0.397 | -1.17 | 0.414 | 1.24 | 0.010 | -1.22 | 0.074 | 1.26  | 0.205 |
| 1459843_s_at | MAD homolog 1 (Drosophila)                                                | Smad1             | -1.15 | 0.391 | 1.1   | 0.946 | 1.24 | 0.001 | 1.02  | 0.724 | 1.11  | 0.195 |
| 1449629_s_at | Small nuclear ribonucleoprotein D3                                        | Snrpd3            | -1.22 | 0.375 | -1.15 | 0.430 | 1.24 | 0.011 | 1.01  | 0.789 | 1.1   | 0.511 |
| 1424634_at   | transcription elongation factor A (SII)-like 1                            | Tceal1            | 1.02  | 0.999 | 1.34  | 0.098 | 1.24 | 0.046 | 1.02  | 0.909 | 1.38  | 0.585 |
| 1427421_at   | t-complex protein 10b                                                     | Tcp10b            | 1.04  | 0.961 | -1.08 | 0.271 | 1.24 | 0.007 | -1.32 | 0.182 | -2.64 | 0.005 |
| 1419132_at   | toll-like receptor 2                                                      | Tlr2              | 1.04  | 0.845 | 1.05  | 0.908 | 1.24 | 0.024 | 1.05  | 0.634 | 1.02  | 0.900 |
| 1425561_at   | tRNA nucleotidyl transferase, CCA-adding, 1                               | Trnt1             | 10.01 | 0.198 | 8.94  | 0.140 | 1.24 | 0.041 | 1.17  | 0.033 | 1.12  | 0.482 |
| 1454846_at   | UTP15, U3 small nucleolar ribonucleoprotein, homolog (yeast)              | Utp15             | -1.08 | 0.475 | 1.21  | 0.151 | 1.24 | 0.003 | 1.23  | 0.010 | 1.23  | 0.038 |
| 1434133_s_at | WD repeat domain 42A                                                      | Wdr42a            | 1.47  | 0.253 | 1.36  | 0.604 | 1.24 | 0.028 | -1.06 | 0.725 | 1.24  | 0.392 |
| 1428678_s_at | WD repeat domain 73                                                       | Wdr73             | -1.01 | 0.808 | 1.25  | 0.047 | 1.24 | 0.016 | 1.2   | 0.055 | 1.22  | 0.024 |
| 1434896_at   | zinc finger protein 422, related sequence 1                               | Zfp422-rs1        | 1.03  | 0.952 | 1.12  | 0.542 | 1.24 | 0.036 | 1.18  | 0.127 | 1.04  | 0.221 |
| 1432322_at   | RIKEN cDNA 2310016E02 gene                                                | 2310016E02Rik     | 1.32  | 0.898 | 1.47  | 0.318 | 1.25 | 0.035 | -1.18 | 0.375 | -1.45 | 0.159 |
| 1435076_at   | RIKEN cDNA 2310047D13 gene                                                | 2310047D13Rik     | 1.2   | 0.442 | 1.31  | 0.162 | 1.25 | 0.025 | 1.21  | 0.009 | 1.05  | 0.487 |
| 1419074_at   | RIKEN cDNA 2510006C20 gene                                                | 2510006C20Rik     | 1.11  | 0.163 | 1.39  | 0.015 | 1.25 | 0.036 | 1.14  | 0.010 | 1.38  | 0.042 |
| 1424692_at   | RIKEN cDNA 2810055F11 gene                                                | 2810055F11Rik     | 1.53  | 0.251 | 1.83  | 0.018 | 1.25 | 0.007 | 1.3   | 0.039 | 1.47  | 0.008 |
| 1415717_at   | RIKEN cDNA 4931406I20 gene                                                | 4931406I20Rik     | -1.05 | 0.648 | -1.05 | 0.561 | 1.25 | 0.042 | 1.1   | 0.557 | 1.04  | 0.561 |
| 1424496_at   | RIKEN cDNA 5133401N09 gene                                                | 5133401N09Rik     | 1.47  | 0.477 | 1.62  | 0.199 | 1.25 | 0.035 | 1.09  | 0.105 | 1.27  | 0.106 |
| 1439259_x_at | abhydrolase domain containing 4                                           | Abhd4             | -1.04 | 0.586 | 1.36  | 0.323 | 1.25 | 0.009 | 1.11  | 0.005 | 1.25  | 0.093 |
| 1427912_at   | carbonyl reductase 3                                                      | Cbr3              | -1.03 | 0.630 | 1.43  | 0.160 | 1.25 | 0.019 | 1.16  | 0.073 | 1.34  | 0.004 |
| 1424638_at   | cyclin-dependent kinase inhibitor 1A (P21)                                | Cdkn1a            | 1.16  | 0.333 | 1.69  | 0.005 | 1.25 | 0.005 | 1.21  | 0.002 | 1.29  | 0.003 |
| 1427822_a_at | coatomer protein complex, subunit gamma 2, antisense 2                    | Copg2as2          | 1.83  | 0.073 | 1.33  | 0.310 | 1.25 | 0.045 | -1.61 | 0.212 | -1.04 | 0.528 |
| 1417904_at   | DNA cross-link repair 1A, PSO2 homolog (S. cerevisiae)                    | Dclre1a           | -1.06 | 0.613 | 1.1   | 0.466 | 1.25 | 0.037 | 1.37  | 0.086 | 1.07  | 0.766 |
| 1425196_a_at | histidine triad nucleotide binding protein 2                              | Hint2             | -1.19 | 0.410 | 1.05  | 0.558 | 1.25 | 0.026 | 1.25  | 0.004 | 1.21  | 0.011 |
| 1428329_a_at | intraflagellar transport 80 homolog (Chlamydomonas)                       | Ift80             | 1.02  | 0.684 | -1.24 | 0.285 | 1.25 | 0.014 | 1.08  | 0.174 | -1.15 | 0.462 |
| 1452316_at   | integrator complex subunit 12                                             | Ints12            | 1.15  | 0.111 | 1.49  | 0.002 | 1.25 | 0.012 | 1.18  | 0.058 | 1.28  | 0.111 |
| 1429351_at   | kelch-like 24 (Drosophila)                                                | Kihl24            | 1.35  | 0.202 | 1.74  | 0.063 | 1.25 | 0.004 | 1.1   | 0.198 | 1.03  | 0.762 |
| 1426284_at   | keratin 20                                                                | Krt20             | 1.21  | 0.030 | 1.3   | 0.005 | 1.25 | 0.035 | 1.07  | 0.145 | 1.23  | 0.123 |
| 1436330_x_at | similar to reduced expression 2 /// similar to reduced expression 2       | LOC278757 /// LOC | -1.06 | 0.436 | 1.11  | 0.689 | 1.25 | 0.035 | 1.04  | 0.882 | 1.34  | 0.250 |
| 1437481_at   | hypothetical LOC623451                                                    | LOC623451         | -1.24 | 0.255 | 1.24  | 0.604 | 1.25 | 0.047 | 1.14  | 0.103 | 1.22  | 0.023 |
| 1434956_at   | similar to ring finger protein 170 /// similar to ring finger protein 170 | LOC668047 /// LOC | -1.09 | 0.459 | -1.25 | 0.290 | 1.25 | 0.026 | 1.12  | 0.304 | 1.04  | 0.971 |
| 1451552_at   | Similar to lipoyltransferase                                              | MGC28431          | 1.43  | 0.443 | 1.67  | 0.015 | 1.25 | 0.046 | 1.42  | 0.027 | 1.44  | 0.103 |
| 1416313_at   | myeloid/lymphoid or mixed-lineage leukemia (trithorax homolog, Dro        | Mllt1             | -1.06 | 0.521 | -1.04 | 0.736 | 1.25 | 0.001 | 1.15  | 0.023 | 1.18  | 0.005 |
| 1426963_at   | phosphofurin acidic cluster sorting protein 2                             | Pacs2             | 1.78  | 0.307 | 1.3   | 0.952 | 1.25 | 0.023 | 1.13  | 0.188 | 1.08  | 0.726 |
| 1424793_a_at | phosphatidylethanolamine binding protein 2                                | Pbp2              | 1.01  | 0.733 | 1.25  | 0.156 | 1.25 | 0.006 | 1.26  | 0.243 | 1.36  | 0.011 |
| 1445203_at   | PDZ domain containing 2                                                   | Pdzd2             | 1.05  | 0.885 | 1.16  | 0.405 | 1.25 | 0.027 | -1.07 | 0.676 | 1.18  | 0.583 |
| 1426752_at   | PHD finger protein 17                                                     | Phf17             | -1.06 | 0.531 | 1.05  | 0.819 | 1.25 | 0.007 | 1.06  | 0.205 | 1.07  | 0.253 |
| 1422272_at   | per-hexamer repeat gene 4                                                 | Phxr4             | 2.7   | 0.274 | 2.61  | 0.571 | 1.25 | 0.040 | 1.1   | 0.479 | 1.42  | 0.435 |
| 1449027_at   | ras homolog gene family, member U                                         | Rhou              | -1.15 | 0.323 | 1.13  | 0.902 | 1.25 | 0.045 | 1.19  | 0.067 | 1.24  | 0.056 |
| 1437353_at   | SET domain containing 1B                                                  | Setd1b            | -1.07 | 0.513 | -1.05 | 0.580 | 1.25 | 0.039 | 1.06  | 0.713 | 1.09  | 0.592 |
| 1434708_at   | von Hippel-Lindau syndrome homolog                                        | Vhlh              | 1.01  | 0.876 | 1.33  | 0.001 | 1.25 | 0.030 | 1.17  | 0.031 | 1.15  | 0.071 |
| 1458523_at   | zinc finger, matrin-like                                                  | Zfml              | 2.03  | 0.703 | 1.21  | 0.444 | 1.25 | 0.033 | 1.6   | 0.325 | 1.53  | 0.945 |
| 1447432_s_at | zinc finger protein 263                                                   | Zfp263            | -1.17 | 0.416 | 1.25  | 0.881 | 1.25 | 0.022 | 1.26  | 0.124 | 1.14  | 0.411 |
| 1424892_at   | zinc finger protein 95                                                    | Zfp95             | 1.17  | 0.399 | 1.53  | 0.031 | 1.25 | 0.032 | 1.2   | 0.031 | 1.47  | 0.023 |
| 1422517_a_at | zinc ribbon domain containing, 1                                          | Znrd1             | -1.01 | 0.749 | 1.21  | 0.144 | 1.25 | 0.034 | 1.26  | 0.005 | 1.31  | 0.051 |
| 1431180_at   | RIKEN cDNA 1700123A16 gene /// similar to zinc finger protein 709         | 1700123A16Rik /// | 1.08  | 0.776 | 1.15  | 0.841 | 1.26 | 0.003 | 1.33  | 0.648 | 1.07  | 0.993 |
| 1447568_at   | RIKEN cDNA 2010003O18 gene                                                | 2010003O18Rik     | -1.23 | 0.306 | -1.2  | 0.357 | 1.26 | 0.025 | 1.35  | 0.188 | 1.09  | 0.742 |
| 1456310_a_at | RIKEN cDNA 2610002J02 gene                                                | 2610002J02Rik     | -1.21 | 0.402 | -1.06 | 0.513 | 1.26 | 0.011 | 1.02  | 0.494 | 1.15  | 0.122 |
| 1429451_at   | RIKEN cDNA 2610301B20 gene                                                | 2610301B20Rik     | 4.28  | 0.264 | 3.69  | 0.117 | 1.26 | 0.049 | 1.12  | 0.445 | 1.33  | 0.025 |
| 1424014_at   | RIKEN cDNA 2900092E17 gene                                                | 2900092E17Rik     | 1.12  | 0.737 | 1.27  | 0.095 | 1.26 | 0.003 | -1.03 | 0.714 | 1.17  | 0.023 |
| 1429665_at   | RIKEN cDNA 6230416J20 gene                                                | 6230416J20Rik     | 1.3   | 0.031 | 1.24  | 0.021 | 1.26 | 0.022 | 1.26  | 0.408 | 1.03  | 0.621 |
| 1448539_a_at | aspartoacylase (aminoacylase) 3                                           | Acy3              | 2.53  | 0.413 | 2.54  | 0.294 | 1.26 | 0.041 | 1.08  | 0.948 | 1.15  | 0.164 |
| 1419435_at   | aldehyde oxidase 1                                                        | Aox1              | -1.13 | 0.278 | 1.04  | 0.770 | 1.26 | 0.002 | 1.16  | 0.795 | 1.31  | 0.166 |
| 1440890_a_at | expressed sequence BB114266                                               | BB114266          | -1.07 | 0.496 | 1.24  | 0.985 | 1.26 | 0.035 | 1.19  | 0.098 | 1.25  | 0.100 |
| 1437455_a_at | B-cell translocation gene 1, anti-proliferative                           | Btg1              | -1.21 | 0.180 | 1.1   | 0.674 | 1.26 | 0.042 | 1.03  | 0.948 | 1.54  | 0.005 |
| 1433781_a_at | claudin 12                                                                | Cldn12            | -1.21 | 0.383 | -1.02 | 0.609 | 1.26 | 0.012 | 1.09  | 0.326 | 1.19  | 0.010 |
| 1443869_at   | RIKEN cDNA E430028B21 gene                                                | E430028B21Rik     | -1.05 | 0.144 | 1.13  | 0.294 | 1.26 | 0.013 | 1.12  | 0.014 | 1.35  | 0.109 |
| 1417969_at   | F-box only protein 31                                                     | Fbxo31            | -1.43 | 0.091 | -1.21 | 0.125 | 1.26 | 0.041 | 1.08  | 0.451 | 1.13  | 0.037 |
| 1454996_at   | hydroxysteroid dehydrogenase like 1                                       | Hsd1l             | -1.05 | 0.435 | 1.15  | 0.383 | 1.26 | 0.017 | 1.2   | 0.000 | 1.33  | 0.050 |

|              |                                                                              |                   |       |       |       |       |      |       |       |       |       |       |
|--------------|------------------------------------------------------------------------------|-------------------|-------|-------|-------|-------|------|-------|-------|-------|-------|-------|
| 1428185_at   | potassium channel tetramerisation domain containing 18                       | Kctd18            | 1.12  | 0.398 | 1.41  | 0.012 | 1.26 | 0.014 | 1.26  | 0.026 | 1.12  | 0.294 |
| 1452733_at   | pantothenate kinase 2 (Hallervorden-Spatz syndrome)                          | Pank2             | -1.17 | 0.327 | 1.13  | 0.979 | 1.26 | 0.001 | 1.34  | 0.070 | 1.17  | 0.321 |
| 1451516_at   | Ras homolog enriched in brain like 1                                         | Rheb1             | 1.54  | 0.248 | 1.73  | 0.062 | 1.26 | 0.034 | 1.22  | 0.231 | 1.25  | 0.052 |
| 1419061_at   | ras homolog gene family, member D                                            | Rhod              | 1.33  | 0.344 | 2.09  | 0.012 | 1.26 | 0.021 | 1.21  | 0.049 | 1.5   | 0.005 |
| 1434626_at   | RNA pseudouridylylase synthase domain containing 3                           | Rpusd3            | -1.04 | 0.452 | 1.09  | 0.853 | 1.26 | 0.046 | 1.16  | 0.140 | 1.28  | 0.220 |
| 1416638_at   | sal-like 2 (Drosophila)                                                      | Sall2             | 1.08  | 0.786 | 1.62  | 0.014 | 1.26 | 0.049 | -1.01 | 0.778 | 1.33  | 0.393 |
| 1418257_at   | solute carrier family 12, member 7                                           | Slc12a7           | -1.05 | 0.648 | -1.18 | 0.106 | 1.26 | 0.050 | 1.05  | 0.233 | 1.09  | 0.807 |
| 1455651_at   | telomeric repeat binding factor 2                                            | Terf2             | -1.28 | 0.219 | -1.11 | 0.476 | 1.26 | 0.038 | 1.04  | 0.569 | 1.12  | 0.741 |
| 1418123_at   | unc-119 homolog (C. elegans)                                                 | Unc119            | 1.37  | 0.369 | 1.43  | 0.070 | 1.26 | 0.012 | 1.04  | 0.505 | 1.1   | 0.517 |
| 1415989_at   | vascular cell adhesion molecule 1                                            | Vcam1             | 1.77  | 0.526 | 2.37  | 0.419 | 1.26 | 0.029 | 1.19  | 0.079 | 1.2   | 0.209 |
| 1451277_at   | zinc binding alcohol dehydrogenase, domain containing 2                      | Zadh2             | -1.03 | 0.595 | 1.13  | 0.515 | 1.26 | 0.005 | 1.2   | 0.032 | 1.22  | 0.076 |
| 1434022_at   | zinc finger and BTB domain containing 33                                     | Zbtb33            | -1.01 | 0.735 | 1.16  | 0.437 | 1.26 | 0.003 | 1.29  | 0.009 | 1.25  | 0.013 |
| 1429739_a_at | zinc finger protein 278                                                      | Zfp278            | 1.09  | 0.620 | 1.71  | 0.019 | 1.26 | 0.025 | 1.25  | 0.028 | 1.52  | 0.009 |
| 1424706_at   | zinc finger protein 51                                                       | Zfp51             | 1.13  | 0.916 | 1.14  | 0.971 | 1.26 | 0.034 | 1.16  | 0.133 | 1.14  | 0.394 |
| 1434689_at   | zinc finger protein 637                                                      | Zfp637            | 1.36  | 0.042 | 1.48  | 0.006 | 1.26 | 0.027 | 1.11  | 0.310 | 1.31  | 0.020 |
| 1435333_at   | RIKEN cDNA 1110007M04 gene                                                   | 1110007M04Rik     | 1.12  | 0.087 | 1.39  | 0.101 | 1.27 | 0.005 | 1.41  | 0.027 | 1.3   | 0.015 |
| 1424872_at   | RIKEN cDNA 2310001H12 gene /// similar to zinc finger protein 709            | 2310001H12Rik /// | 1.23  | 0.925 | 1.91  | 0.127 | 1.27 | 0.012 | 1.43  | 0.042 | 1.13  | 0.080 |
| 1436323_at   | RIKEN cDNA 2810001A02 gene                                                   | 2810001A02Rik     | 1.07  | 0.477 | 1.29  | 0.148 | 1.27 | 0.043 | 1.13  | 0.259 | 1.29  | 0.098 |
| 1427959_at   | abhydrolase domain containing 10                                             | Abhd10            | 1.04  | 0.551 | 1.38  | 0.026 | 1.27 | 0.027 | 1.25  | 0.029 | 1.29  | 0.029 |
| 1417326_a_at | anaphase promoting complex subunit 11 homolog (yeast)                        | Anapc11           | 1.01  | 0.647 | 1.12  | 0.118 | 1.27 | 0.007 | 1.04  | 0.289 | 1.07  | 0.278 |
| 1440928_at   | RIKEN cDNA D630037F22 gene                                                   | D630037F22Rik     | -1.08 | 0.523 | -1.67 | 0.006 | 1.27 | 0.017 | -1.21 | 0.150 | 1.19  | 0.173 |
| 1426870_at   | F-box only protein 33                                                        | Fbxo33            | -1.03 | 0.547 | 1.29  | 0.019 | 1.27 | 0.035 | 1.17  | 0.037 | 1.34  | 0.052 |
| 1417922_at   | kelch repeat and BTB (POZ) domain containing 4                               | Kbtbd4            | 1.23  | 0.136 | 1.6   | 0.008 | 1.27 | 0.027 | -1    | 0.837 | 1.41  | 0.087 |
| 1455155_at   | LSM14 homolog B (SCD6, S. cerevisiae)                                        | Lsm14b            | -1.01 | 0.701 | 1.16  | 0.564 | 1.27 | 0.012 | 1.08  | 0.014 | 1.17  | 0.151 |
| 1434836_at   | nuclear factor of activated T-cells, cytoplasmic, calcineurin-dependent      | Nfatc2ip          | -1.06 | 0.550 | 1.11  | 0.821 | 1.27 | 0.023 | 1.12  | 0.145 | 1.31  | 0.015 |
| 1426533_at   | nucleolar protein 5A                                                         | Nol5a             | 1.43  | 0.428 | 1.69  | 0.040 | 1.27 | 0.001 | 1.43  | 0.008 | 1.2   | 0.087 |
| 1429139_at   | OTU domain containing 7B                                                     | Otu7b             | 1.01  | 0.705 | 1.19  | 0.305 | 1.27 | 0.032 | -1.01 | 0.819 | 1.2   | 0.058 |
| 1453299_a_at | purine-nucleoside phosphorylase /// similar to purine-nucleoside phosphatase | Pnp /// LOC545044 | 1.5   | 0.195 | 1.85  | 0.050 | 1.27 | 0.003 | 1.14  | 0.025 | 1.35  | 0.082 |
| 1433668_at   | proline-rich nuclear receptor coactivator 1                                  | Pnrnc1            | 1     | 0.913 | 1.29  | 0.129 | 1.27 | 0.031 | 1.19  | 0.005 | 1.36  | 0.010 |
| 1424473_at   | polymerase (RNA) II (DNA directed) polypeptide H                             | Polr2h            | 1.25  | 0.115 | 1.58  | 0.000 | 1.27 | 0.005 | 1.21  | 0.041 | 1.22  | 0.054 |
| 1460168_at   | stem-loop binding protein                                                    | Slbp              | 1.2   | 0.071 | 1.73  | 0.002 | 1.27 | 0.009 | 1.23  | 0.002 | 1.28  | 0.092 |
| 1441315_s_at | solute carrier family 19 (thiamine transporter), member 2                    | Slc19a2           | 1.03  | 0.634 | 1.47  | 0.531 | 1.27 | 0.017 | 1.08  | 0.012 | 1.32  | 0.044 |
| 1448317_at   | transmembrane protein 128                                                    | Tmem128           | -1.01 | 0.844 | 1.13  | 0.313 | 1.27 | 0.018 | 1.04  | 0.509 | 1.05  | 0.607 |
| 1428779_at   | zinc finger and BTB domain containing 41 homolog                             | Zbtb41            | 1.04  | 0.946 | 1.22  | 0.162 | 1.27 | 0.046 | 1.22  | 0.082 | 1.17  | 0.043 |
| 1452840_at   | RIKEN cDNA 1500009L16 gene                                                   | 1500009L16Rik     | 1.14  | 0.584 | 1.17  | 0.186 | 1.28 | 0.024 | -1.29 | 0.009 | 1.16  | 0.365 |
| 1453332_at   | RIKEN cDNA 2410002O22 gene                                                   | 2410002O22Rik     | -1.01 | 0.759 | 1.24  | 0.191 | 1.28 | 0.010 | -1.01 | 0.681 | 1.13  | 0.163 |
| 1431865_a_at | RIKEN cDNA 4933405K07 gene                                                   | 4933405K07Rik     | 1.23  | 0.229 | 2.47  | 0.492 | 1.28 | 0.004 | -1.31 | 0.122 | 2.12  | 0.633 |
| 1437911_at   | RIKEN cDNA 6330416L07 gene                                                   | 6330416L07Rik     | 1.25  | 0.634 | 1.7   | 0.050 | 1.28 | 0.024 | 1.1   | 0.338 | 1.14  | 0.248 |
| 1437180_at   | RIKEN cDNA 6530403A03 gene                                                   | 6530403A03Rik     | 1.07  | 0.774 | 1.04  | 0.883 | 1.28 | 0.029 | 1.15  | 0.054 | -1.12 | 0.156 |
| 1425354_a_at | angiogenic factor with G patch and FHA domains 1                             | Aggf1             | -1.09 | 0.524 | 1.16  | 0.666 | 1.28 | 0.041 | 1.12  | 0.153 | 1.16  | 0.159 |
| 1433465_a_at | expressed sequence AI467606                                                  | AI467606          | -1.27 | 0.253 | 1.11  | 0.641 | 1.28 | 0.028 | 1.09  | 0.778 | 2.35  | 0.079 |
| 1416631_at   | adaptor-related protein complex AP-4, beta 1                                 | Ap4b1             | 1.22  | 0.516 | 1.38  | 0.031 | 1.28 | 0.009 | 1.08  | 0.246 | 1.2   | 0.002 |
| 1435182_at   | RIKEN cDNA C530028I08 gene                                                   | C530028I08Rik     | -1.15 | 0.124 | -1.09 | 0.468 | 1.28 | 0.022 | 1.02  | 0.877 | -1.13 | 0.059 |
| 1420098_s_at | DNA segment, Chr 13, ERATO Doi 787, expressed                                | D13Erd787e        | -1.11 | 0.466 | -1.38 | 0.135 | 1.28 | 0.028 | 1.54  | 0.064 | 1.22  | 0.711 |
| 1435348_at   | RIKEN cDNA D930009K15 gene                                                   | D930009K15Rik     | 1.05  | 0.722 | 1.27  | 0.073 | 1.28 | 0.030 | 1.37  | 0.011 | 1.37  | 0.003 |
| 1421731_a_at | flap structure specific endonuclease 1                                       | Fen1              | 1.18  | 0.546 | 1.56  | 0.001 | 1.28 | 0.003 | 1.25  | 0.030 | 1.27  | 0.001 |
| 1422977_at   | glycoprotein Ib, beta polypeptide                                            | Gp1bb             | -1.15 | 0.403 | -1.01 | 0.631 | 1.28 | 0.025 | 1.08  | 0.475 | 1.22  | 0.303 |
| 1416155_at   | high mobility group box 3                                                    | Hmgb3             | 1.26  | 0.408 | 1.33  | 0.296 | 1.28 | 0.046 | 1.12  | 0.028 | 1.1   | 0.114 |
| 1422433_s_at | isocitrate dehydrogenase 1 (NADP+), soluble                                  | Idh1              | -1.14 | 0.426 | -1.37 | 0.128 | 1.28 | 0.045 | 1.1   | 0.086 | 1.05  | 0.435 |
| 1449158_at   | potassium channel, subfamily K, member 2                                     | Kcnk2             | 1.28  | 0.180 | 1.36  | 0.162 | 1.28 | 0.038 | 1.25  | 0.006 | 1.04  | 0.314 |
| 1426988_at   | kelch domain containing 5                                                    | Klhd5             | 3.69  | 0.376 | 3.44  | 0.015 | 1.28 | 0.000 | 1.25  | 0.134 | 1.48  | 0.012 |
| 1423071_x_at | hypothetical gene supported by BC019681; BC027236 /// hypothetical           | LOC270335 /// LOC | -1.06 | 0.518 | 1.02  | 0.874 | 1.28 | 0.001 | 1.26  | 0.008 | 1.2   | 0.023 |
| 1433644_at   | protein-O-mannosyltransferase 2                                              | Pomt2             | 1.31  | 0.856 | 1.35  | 0.409 | 1.28 | 0.041 | 1.06  | 0.424 | 1.34  | 0.186 |
| 1438753_at   | Porcupine homolog (Drosophila)                                               | Porcn             | 1.07  | 0.849 | 1.23  | 0.677 | 1.28 | 0.030 | -1.2  | 0.322 | -1.16 | 0.161 |
| 1451080_at   | ubiquitin specific peptidase 1                                               | Usp1              | 1.38  | 0.036 | 1.7   | 0.011 | 1.28 | 0.022 | 1.17  | 0.029 | 1.25  | 0.042 |
| 1418928_a_at | RIKEN cDNA 2310038H17 gene                                                   | 2310038H17Rik     | -1.11 | 0.331 | 1.04  | 0.885 | 1.29 | 0.009 | 1.03  | 0.354 | 1.01  | 0.975 |
| 1448308_at   | adaptor-related protein complex 3, mu 1 subunit                              | Ap3m1             | 1.1   | 0.037 | 1.23  | 0.073 | 1.29 | 0.018 | 1.22  | 0.002 | 1.14  | 0.090 |
| 1450877_at   | cDNA sequence BC005537                                                       | BC005537          | 1.2   | 0.334 | 1.13  | 0.771 | 1.29 | 0.028 | 1.09  | 0.537 | -1.01 | 0.699 |



|              |                                                                       |               |       |       |       |       |      |       |       |       |       |       |
|--------------|-----------------------------------------------------------------------|---------------|-------|-------|-------|-------|------|-------|-------|-------|-------|-------|
| 1435175_at   | cDNA sequence BC034090                                                | BC034090      | -1.04 | 0.573 | 1.19  | 0.496 | 1.29 | 0.012 | -1    | 0.960 | 1.19  | 0.491 |
| 1453683_a_at | centrosomal protein 55                                                | Cep55         | 7.88  | 0.278 | 4.93  | 0.608 | 1.29 | 0.017 | 1.15  | 0.424 | -1.1  | 0.669 |
| 1419429_at   | ciliary neurotrophic factor receptor                                  | Cntrf         | -1.09 | 0.673 | 1.56  | 0.071 | 1.29 | 0.011 | 2.1   | 0.036 | 1.68  | 0.835 |
| 1433809_at   | DEAD (Asp-Glu-Ala-Asp) box polypeptide 5                              | Ddx5          | 1.07  | 0.699 | 1.23  | 0.630 | 1.29 | 0.047 | 1.02  | 0.779 | 1.6   | 0.195 |
| 1427239_at   | intraflagellar transport 122 homolog (Chlamydomonas)                  | Ift122        | 1.48  | 0.509 | 1.84  | 0.327 | 1.29 | 0.022 | -1.04 | 0.738 | -1.13 | 0.307 |
| 1422816_a_at | mutY homolog (E. coli)                                                | Mutyh         | 1.05  | 0.627 | 1.36  | 0.883 | 1.29 | 0.036 | 1.19  | 0.238 | 1.16  | 0.780 |
| 1419967_at   | SEH1-like (S. cerevisiae)                                             | Seh1l         | -1.26 | 0.265 | 1.12  | 0.720 | 1.29 | 0.030 | 1.17  | 0.467 | 1.23  | 0.229 |
| 1452931_at   | RIKEN cDNA 2810408M09 gene                                            | 2810408M09Rik | -1.1  | 0.472 | -1.04 | 0.611 | 1.3  | 0.027 | 1.12  | 0.025 | 1.19  | 0.196 |
| 1427085_at   | RIKEN cDNA 2810432D09 gene                                            | 2810432D09Rik | 1.03  | 0.905 | 1.5   | 0.162 | 1.3  | 0.046 | 1.3   | 0.003 | 1.25  | 0.090 |
| 1429563_x_at | RIKEN cDNA 5031415C07 gene                                            | 5031415C07Rik | -1.2  | 0.401 | -1    | 0.563 | 1.3  | 0.037 | 1.17  | 0.123 | 1.22  | 0.146 |
| 1446299_at   | RIKEN cDNA 6720456B07 gene                                            | 6720456B07Rik | 1.1   | 0.577 | -1.01 | 0.922 | 1.3  | 0.014 | 1.46  | 0.097 | -1.32 | 0.157 |
| 1436942_at   | RIKEN cDNA A930035D04 gene                                            | A930035D04Rik | -1.13 | 0.375 | 1.05  | 0.937 | 1.3  | 0.007 | 1.19  | 0.048 | 1.22  | 0.114 |
| 1423570_at   | ATP-binding cassette, sub-family G (WHITE), member 1                  | Abcg1         | -1.2  | 0.389 | -1.58 | 0.098 | 1.3  | 0.046 | -1.12 | 0.282 | 1.01  | 0.763 |
| 1442429_at   | Adaptor protein complex AP-2, mu1                                     | Ap2m1         | 1.3   | 0.002 | 1.11  | 0.863 | 1.3  | 0.006 | 1.37  | 0.792 | -1.57 | 0.117 |
| 1450648_s_at | histocompatibility 2, class II antigen A, beta 1                      | H2-Ab1        | 1.13  | 0.676 | 1.16  | 0.164 | 1.3  | 0.006 | 1.1   | 0.228 | -1.02 | 0.949 |
| 1453573_at   | histone1, H3d                                                         | Hist1h3d      | -1.28 | 0.284 | -1.04 | 0.525 | 1.3  | 0.006 | 1.19  | 0.068 | 1.21  | 0.175 |
| 1441100_at   | mbt domain containing 1                                               | Mbtd1         | 1.12  | 0.820 | -1.02 | 0.540 | 1.3  | 0.036 | 1.15  | 0.021 | 1.04  | 0.794 |
| 1449550_at   | myosin IC                                                             | Myo1c         | 1.05  | 0.348 | 1.33  | 0.019 | 1.3  | 0.048 | 1.25  | 0.012 | 1.32  | 0.020 |
| 1448728_a_at | nuclear factor of kappa light polypeptide gene enhancer in B-cells in | Nfkbiz        | 1.15  | 0.028 | 1.41  | 0.144 | 1.3  | 0.049 | 1.23  | 0.063 | -1.03 | 0.732 |
| 1438951_x_at | nucleoporin 54                                                        | Nup54         | -1.05 | 0.567 | 1.21  | 0.979 | 1.3  | 0.005 | 1.03  | 0.647 | 1.31  | 0.001 |
| 1424453_at   | phosphate cytidylyltransferase 1, choline, alpha isoform              | Pcyt1a        | 1.00  | 0.400 | 2.41  | 0.796 | 1.3  | 0.048 | 1.07  | 0.477 | -1.03 | 0.658 |
| 1427929_a_at | pyridoxal (pyridoxine, vitamin B6) kinase                             | Pdxk          | -1.26 | 0.343 | -1.02 | 0.575 | 1.3  | 0.010 | 1.19  | 0.064 | 1.45  | 0.024 |
| 1451199_at   | queuine tRNA-ribosyltransferase domain containing 1                   | Qtrtd1        | -1.25 | 0.321 | 1.08  | 0.960 | 1.3  | 0.032 | 1.13  | 0.035 | 1.41  | 0.005 |
| 1417406_at   | SERTA domain containing 1                                             | Sertad1       | -1.06 | 0.513 | 1.14  | 0.969 | 1.3  | 0.007 | 1.26  | 0.006 | 1.34  | 0.021 |
| 1423616_at   | TAR (HIV) RNA binding protein 2                                       | Tarbp2        | 1.05  | 0.469 | 1.1   | 0.176 | 1.3  | 0.004 | 1.12  | 0.688 | 1.2   | 0.230 |
| 1433705_at   | zinc finger protein 213                                               | Zfp213        | 1.04  | 0.972 | 1.39  | 0.007 | 1.3  | 0.020 | 1.31  | 0.007 | 1.52  | 0.023 |
| 1459383_at   | Zinc finger protein 52                                                | Zfp52         | -1.04 | 0.691 | -1.34 | 0.296 | 1.3  | 0.007 | 2.21  | 0.312 | -1.07 | 0.730 |
| 1429099_at   | RIKEN cDNA 1110051B16 gene                                            | 1110051B16Rik | 1.24  | 0.768 | 1.11  | 0.369 | 1.31 | 0.014 | -1.35 | 0.204 | 1.22  | 0.544 |
| 1429100_at   | RIKEN cDNA 2010109K11 gene                                            | 2010109K11Rik | -1.04 | 0.700 | 1.11  | 0.506 | 1.31 | 0.012 | 1.08  | 0.073 | 1.23  | 0.107 |
| 1432447_a_at | RIKEN cDNA 2310005N01 gene                                            | 2310005N01Rik | 1.08  | 0.919 | 1.44  | 0.267 | 1.31 | 0.045 | 1.11  | 0.092 | 1.27  | 0.126 |
| 1428873_a_at | RIKEN cDNA 4121402D02 gene                                            | 4121402D02Rik | 1.98  | 0.440 | 1.95  | 0.300 | 1.31 | 0.049 | 1.03  | 0.901 | 1.11  | 0.487 |
| 1429422_at   | RIKEN cDNA 4933412E12 gene                                            | 4933412E12Rik | 2.4   | 0.131 | 3.35  | 0.237 | 1.31 | 0.042 | 1.03  | 0.224 | 1.11  | 0.326 |
| 1417655_a_at | arsenate resistance protein 2                                         | Ars2          | -1.11 | 0.397 | 1.14  | 0.341 | 1.31 | 0.009 | 1.24  | 0.048 | 1.25  | 0.020 |
| 1460360_at   | asparaginase like 1                                                   | Asrgl1        | 1.09  | 0.694 | -1.09 | 0.380 | 1.31 | 0.008 | 1.12  | 0.627 | 1.37  | 0.189 |
| 1434532_at   | cDNA sequence BC035295                                                | BC035295      | -1.07 | 0.499 | 1.44  | 0.752 | 1.31 | 0.000 | 1.37  | 0.013 | 1.43  | 0.002 |
| 1451574_at   | B-cell CLL/lymphoma 9                                                 | Bcl9          | -1.38 | 0.134 | -1.06 | 0.479 | 1.31 | 0.002 | -1.1  | 0.337 | 1.08  | 0.572 |
| 1436917_s_at | G-protein signalling modulator 1 (AGS3-like, C. elegans)              | Gpsm1         | -1.19 | 0.425 | -1.02 | 0.593 | 1.31 | 0.018 | -1.07 | 0.130 | 1.29  | 0.123 |
| 1451660_a_at | homeo box B6                                                          | Hoxb6         | -1.1  | 0.431 | -1.09 | 0.471 | 1.31 | 0.001 | 1.01  | 0.922 | 1.43  | 0.262 |
| 1435950_at   | hairless                                                              | Hr            | -2.26 | 0.157 | -1.13 | 0.466 | 1.31 | 0.026 | 1.2   | 0.167 | 1.18  | 0.417 |
| 1451016_at   | interferon-related developmental regulator 2                          | Ildr2         | 4.81  | 0.963 | 4.6   | 0.428 | 1.31 | 0.020 | 1.1   | 0.671 | 1.23  | 0.127 |
| 1452166_a_at | keratin 10                                                            | Krt10         | 1.07  | 0.957 | 1.32  | 0.247 | 1.31 | 0.018 | 1.22  | 0.099 | 1.37  | 0.012 |
| 1422552_at   | repmo, TP53 dependent G2 arrest mediator candidate                    | Rprm          | 1.6   | 0.294 | 4.18  | 0.007 | 1.31 | 0.022 | 1.36  | 0.042 | 2.34  | 0.011 |
| 1449480_at   | Sin3-associated polypeptide 18                                        | Sap18         | 1.17  | 0.290 | 1.48  | 0.203 | 1.31 | 0.038 | 1.34  | 0.017 | 1.31  | 0.192 |
| 1418377_a_at | Cd27 binding protein (Hindu God of destruction)                       | Siva          | 1.05  | 0.327 | 1.41  | 0.067 | 1.31 | 0.021 | 1.15  | 0.101 | 1.31  | 0.068 |
| 1455212_at   | WD repeat domain 24                                                   | Wdr24         | 1.07  | 0.989 | 1.26  | 0.260 | 1.31 | 0.000 | 1.11  | 0.376 | 1.19  | 0.039 |
| 1454790_at   | WD repeat domain 35                                                   | Wdr35         | -1.01 | 0.683 | 1.22  | 0.411 | 1.31 | 0.019 | 1     | 0.967 | 1.11  | 0.529 |
| 1428926_at   | RIKEN cDNA 1110003O08 gene                                            | 1110003O08Rik | -1.17 | 0.300 | -1    | 0.616 | 1.32 | 0.029 | 1.7   | 0.047 | 1.03  | 0.915 |
| 1450323_at   | RIKEN cDNA 5730493B19 gene                                            | 5730493B19Rik | 1.54  | 0.270 | 1.57  | 0.020 | 1.32 | 0.017 | -1.35 | 0.138 | -1.07 | 0.435 |
| 1428502_at   | ARF6 actin-related protein 6 homolog (yeast)                          | Actr6         | -1.09 | 0.550 | 1.1   | 0.528 | 1.32 | 0.040 | 1.18  | 0.100 | 1.35  | 0.012 |
| 1421603_a_at | CEA-related cell adhesion molecule 2                                  | Ceacam2       | 1.27  | 0.192 | 1.5   | 0.163 | 1.32 | 0.041 | 2.45  | 0.469 | 1.24  | 0.431 |
| 1456795_at   | RIKEN cDNA D330027G24 gene                                            | D330027G24Rik | 1.12  | 0.536 | 1.43  | 0.797 | 1.32 | 0.007 | 1     | 0.962 | 1.16  | 0.500 |
| 1419353_at   | dolichol-phosphate (beta-D) mannosyltransferase 1                     | Dpm1          | -1.02 | 0.726 | -1.37 | 0.018 | 1.32 | 0.009 | 1.09  | 0.629 | -1.13 | 0.660 |
| 1431422_a_at | dual specificity phosphatase 14                                       | Dusp14        | 1.88  | 0.299 | 2.21  | 0.031 | 1.32 | 0.019 | 1.37  | 0.006 | 1.27  | 0.039 |
| 1450935_at   | excision repair cross-complementing rodent repair deficiency, compl   | Ercc5         | -1.01 | 0.580 | 1.91  | 0.140 | 1.32 | 0.025 | 1.26  | 0.042 | 1.3   | 0.071 |
| 1455726_at   | gene model 71, (NCBI)                                                 | Gm71          | -1.11 | 0.406 | 1.04  | 0.799 | 1.32 | 0.016 | 1.13  | 0.097 | 1.19  | 0.031 |
| 1429180_at   | guanosine monophosphate reductase 2                                   | Gmpr2         | 1.06  | 0.987 | -1.24 | 0.212 | 1.32 | 0.001 | 1.37  | 0.270 | -1.05 | 0.405 |
| 1436459_at   | G protein-coupled receptor 161                                        | Gpr161        | 1.04  | 0.971 | 1.19  | 0.233 | 1.32 | 0.050 | 1.05  | 0.838 | 1.14  | 0.316 |
| 1417477_at   | gene trap locus F3b                                                   | Glif3b        | -1.11 | 0.340 | 1.19  | 0.500 | 1.32 | 0.004 | 1.17  | 0.001 | 1.37  | 0.016 |

|              |                                                                                              |                    |       |       |       |       |      |       |       |       |       |       |
|--------------|----------------------------------------------------------------------------------------------|--------------------|-------|-------|-------|-------|------|-------|-------|-------|-------|-------|
| 1428856_at   | Histocompatibility 13                                                                        | H13                | 1.2   | 0.878 | 1.1   | 0.940 | 1.32 | 0.032 | 1.35  | 0.348 | 1.45  | 0.227 |
| 1417292_at   | interferon gamma inducible protein 47                                                        | Ifi47              | 1.1   | 0.414 | 1.2   | 0.564 | 1.32 | 0.019 | 1.1   | 0.067 | -1.06 | 0.207 |
| 1423104_at   | insulin receptor substrate 1                                                                 | Irs1               | 1.41  | 0.165 | 1.98  | 0.109 | 1.32 | 0.007 | 1.33  | 0.004 | 1.23  | 0.017 |
| 1457040_at   | leucine-rich repeat LGI family, member 2                                                     | Lgi2               | -1.23 | 0.294 | 1.13  | 0.727 | 1.32 | 0.042 | 1.11  | 0.159 | 1.5   | 0.069 |
| 1445330_at   | protein disulfide isomerase associated 3                                                     | Pdia3              | 1.06  | 0.206 | -1.19 | 0.123 | 1.32 | 0.005 | 1.08  | 0.658 | -1.03 | 0.612 |
| 1428992_at   | unc-13 homolog D (C. elegans)                                                                | Unc13d             | 1.97  | 0.250 | 2.01  | 0.219 | 1.32 | 0.033 | 1.09  | 0.827 | 1.19  | 0.542 |
| 1418284_at   | vacuolar protein sorting 72 (yeast)                                                          | Vps72              | 2     | 0.548 | 2.34  | 0.313 | 1.32 | 0.018 | 1.2   | 0.121 | 1.16  | 0.340 |
| 1435565_at   | RIKEN cDNA 1500011H22 gene                                                                   | 1500011H22Rik      | 1.08  | 0.642 | 1.64  | 0.699 | 1.33 | 0.008 | 1.47  | 0.009 | 1.35  | 0.066 |
| 1436049_at   | RIKEN cDNA 5730589K01 gene                                                                   | 5730589K01Rik      | 1.25  | 0.021 | 1.37  | 0.012 | 1.33 | 0.016 | 1.1   | 0.100 | 1.12  | 0.699 |
| 1435913_at   | beta-1,4-N-acetyl-galactosaminyl transferase 4                                               | B4galnt4           | 1.18  | 0.253 | -1.14 | 0.243 | 1.33 | 0.020 | 1.33  | 0.100 | -1.05 | 0.838 |
| 1425095_at   | cDNA sequence BC002059                                                                       | BC002059           | -1.06 | 0.618 | 1.25  | 0.622 | 1.33 | 0.037 | 1.02  | 0.919 | 1.09  | 0.447 |
| 1453102_at   | fibronectin leucine rich transmembrane protein 3                                             | Flrt3              | 1.6   | 0.437 | 2.79  | 0.025 | 1.33 | 0.001 | 1.31  | 0.032 | 1.5   | 0.013 |
| 1423998_at   | general transcription factor IIIC, polypeptide 5                                             | Gtf3c5             | 1.55  | 0.208 | 1.84  | 0.026 | 1.33 | 0.040 | 1.13  | 0.090 | 1.33  | 0.050 |
| 1456200_at   | inositol polyphosphate multikinase                                                           | Ipmk               | -1.06 | 0.495 | 1.1   | 0.830 | 1.33 | 0.039 | 1.28  | 0.008 | 1.1   | 0.255 |
| 1434354_at   | monoamine oxidase B                                                                          | Maob               | 1.06  | 0.542 | 1.02  | 0.750 | 1.33 | 0.036 | -1.16 | 0.564 | 1.27  | 0.600 |
| 1424988_at   | myosin regulatory light chain interacting protein                                            | Myliip             | 1.01  | 0.556 | 1.05  | 0.498 | 1.33 | 0.015 | 1.45  | 0.007 | 1.33  | 0.038 |
| 1416853_at   | neurochondrin                                                                                | Ncdn               | 1.03  | 0.922 | 1.31  | 0.200 | 1.33 | 0.009 | 1.21  | 0.063 | 1.12  | 0.488 |
| 1457198_at   | neuropilin 1                                                                                 | Nrp1               | -1.02 | 0.526 | 1.1   | 0.642 | 1.33 | 0.010 | 1.38  | 0.098 | 1.08  | 0.029 |
| 1439348_at   | S100 calcium binding protein A10 (calpactin)                                                 | S100a10            | 1.1   | 0.673 | 1.21  | 0.457 | 1.33 | 0.040 | 1.24  | 0.213 | 1.13  | 0.616 |
| 1453559_a_at | Sel1 (suppressor of lin-12) 1 homolog (C. elegans)                                           | Sel1h              | 1.29  | 0.507 | 1.02  | 0.411 | 1.33 | 0.044 | 1.41  | 0.401 | 1.16  | 0.658 |
| 1455297_at   | spindlin family, member 2                                                                    | Spin2              | 1.39  | 0.415 | 1.53  | 0.048 | 1.33 | 0.018 | 1.11  | 0.658 | 1.35  | 0.064 |
| 1418261_at   | spleen tyrosine kinase                                                                       | Syk                | -1.08 | 0.400 | -1.14 | 0.129 | 1.33 | 0.010 | -1.15 | 0.009 | 1.14  | 0.454 |
| 1449732_at   | zinc finger proliferation 1                                                                  | Zipro1             | -1.25 | 0.396 | 1.16  | 0.543 | 1.33 | 0.011 | 1.42  | 0.083 | 1.61  | 0.143 |
| 1451321_a_at | RIKEN cDNA 0610033I05 gene                                                                   | 0610033I05Rik      | -1.07 | 0.482 | 1.64  | 0.066 | 1.34 | 0.009 | 1.07  | 0.148 | 1.28  | 0.040 |
| 1428550_at   | RIKEN cDNA 1810015A11 gene                                                                   | 1810015A11Rik      | 1.06  | 0.364 | 1.27  | 0.025 | 1.34 | 0.004 | 1.43  | 0.017 | 1.41  | 0.040 |
| 1455652_at   | expressed sequence AW124694                                                                  | AW124694           | 1.58  | 0.866 | 1.19  | 0.313 | 1.34 | 0.032 | 1.16  | 0.827 | 1.14  | 0.376 |
| 1441910_x_at | cyclin E1                                                                                    | Ccne1              | -1.1  | 0.496 | 1.1   | 0.893 | 1.34 | 0.035 | 1.19  | 0.065 | 1.23  | 0.091 |
| 1436549_a_at | heterogeneous nuclear ribonucleoprotein A1                                                   | Hnrpa1             | -1.14 | 0.455 | -1.16 | 0.433 | 1.34 | 0.013 | 1.21  | 0.055 | 1.25  | 0.110 |
| 1457907_at   | NIMA (never in mitosis gene a)-related expressed kinase 7                                    | Nek7               | 1.59  | 0.270 | 2.12  | 0.275 | 1.34 | 0.041 | 1.17  | 0.548 | 1.26  | 0.408 |
| 1442048_at   | ring finger protein 11                                                                       | Rnf11              | -1.19 | 0.276 | -1.19 | 0.331 | 1.34 | 0.012 | 1.12  | 0.332 | 1.09  | 0.013 |
| 1421528_a_at | surfeit gene 5                                                                               | Surf5              | 1.03  | 0.625 | 1.42  | 0.007 | 1.34 | 0.007 | 1.3   | 0.009 | 1.48  | 0.025 |
| 1424175_at   | thyrotroph embryonic factor                                                                  | Tef                | -1.08 | 0.438 | 1.21  | 0.225 | 1.34 | 0.043 | 1.09  | 0.288 | 1.11  | 0.188 |
| 1435350_at   | Tnf receptor-associated factor 6                                                             | Traf6              | -1.2  | 0.364 | -1.1  | 0.445 | 1.34 | 0.020 | -1.02 | 0.607 | 1.09  | 0.905 |
| 1426987_at   | RIKEN cDNA 5430417L22 gene                                                                   | 5430417L22Rik      | 1.35  | 0.313 | 1.4   | 0.147 | 1.35 | 0.022 | 1.19  | 0.120 | 1.25  | 0.230 |
| 1455196_s_at | expressed sequence AA987161                                                                  | AA987161           | -1.05 | 0.520 | 1.1   | 0.861 | 1.35 | 0.050 | 1.2   | 0.472 | -1.08 | 0.626 |
| 1450716_at   | a disintegrin-like and metalloproteinase (reprolysin type) with thrombospondin type 1 motifs | Adamts1            | 1.09  | 0.215 | 1.27  | 0.083 | 1.35 | 0.001 | 1.35  | 0.039 | 1.49  | 0.059 |
| 1451533_at   | cDNA sequence BC022687                                                                       | BC022687           | 1.27  | 0.827 | 1.81  | 0.093 | 1.35 | 0.006 | 1.13  | 0.046 | 1.21  | 0.038 |
| 1436422_at   | cDNA sequence BC026590                                                                       | BC026590           | 1.33  | 0.507 | 1.82  | 0.058 | 1.35 | 0.019 | 1.29  | 0.003 | 1.48  | 0.005 |
| 1419046_at   | brain protein 16                                                                             | Bp16               | -1.03 | 0.562 | 1.09  | 0.489 | 1.35 | 0.005 | 1.09  | 0.694 | 1.26  | 0.150 |
| 1449296_a_at | cyclic nucleotide phosphodiesterase 1                                                        | Cnp1               | 1.55  | 0.648 | 1.78  | 0.243 | 1.35 | 0.021 | 1.05  | 0.466 | -1.09 | 0.843 |
| 1449037_at   | cAMP responsive element modulator                                                            | Crem               | 1.25  | 0.126 | 1.6   | 0.053 | 1.35 | 0.001 | 1.24  | 0.053 | 1.52  | 0.005 |
| 1437187_at   | E2F transcription factor 7                                                                   | E2f7               | -1.02 | 0.730 | 1.37  | 0.145 | 1.35 | 0.022 | 1.12  | 0.238 | 1.25  | 0.036 |
| 1440085_at   | ectodysplasin A2 isoform receptor                                                            | Eda2r              | 1.43  | 0.232 | 2.18  | 0.029 | 1.35 | 0.006 | 1.15  | 0.032 | 1.24  | 0.006 |
| 1430311_at   | Myristoylated alanine rich protein kinase C substrate                                        | Marcks             | 1.13  | 0.722 | 1.72  | 0.001 | 1.35 | 0.038 | 1.42  | 0.646 | 1.12  | 0.888 |
| 1428339_at   | nudix (nucleoside diphosphate linked moiety X)-type motif 21                                 | Nudt21             | 1.3   | 0.259 | 1.38  | 0.091 | 1.35 | 0.003 | 1.27  | 0.003 | 1.3   | 0.007 |
| 1457480_at   | Polycomb group ring finger 3                                                                 | Pcgf3              | 1.01  | 0.650 | 1.01  | 0.684 | 1.35 | 0.033 | 1.14  | 0.607 | 1.17  | 0.965 |
| 1457083_at   | PRP31 pre-mRNA processing factor 31 homolog (yeast)                                          | Prpf31             | 1.59  | 0.196 | 2.41  | 0.030 | 1.35 | 0.032 | 1.41  | 0.043 | 1.74  | 0.020 |
| 1454639_x_at | ribosomal protein L41 /// RIKEN cDNA 2210411K19 gene                                         | Rpl41 /// 2210411K | -1.26 | 0.353 | -1.05 | 0.493 | 1.35 | 0.032 | 1.11  | 0.689 | 1.24  | 0.204 |
| 1424817_at   | sperm flagellar 1                                                                            | Spef1              | -1.17 | 0.393 | -1.01 | 0.642 | 1.35 | 0.010 | 1.47  | 0.110 | 1.18  | 0.237 |
| 1447159_at   | Synaptic nuclear envelope 2                                                                  | Syne2              | 1.44  | 0.440 | 1.05  | 0.897 | 1.35 | 0.050 | 1.23  | 0.023 | -1.18 | 0.460 |
| 1418547_at   | tissue factor pathway inhibitor 2                                                            | Tfpi2              | -1.03 | 0.810 | 1.19  | 0.102 | 1.35 | 0.005 | -1.02 | 0.943 | 1.17  | 0.240 |
| 1458511_at   | RIKEN cDNA 2410025L10 gene                                                                   | 2410025L10Rik      | 1.58  | 0.375 | 1.74  | 0.324 | 1.36 | 0.008 | -1.05 | 0.088 | 1.24  | 0.218 |
| 1449122_at   | RIKEN cDNA 3110003A22 gene                                                                   | 3110003A22Rik      | 1.36  | 0.496 | 1.98  | 0.021 | 1.36 | 0.005 | 1.38  | 0.040 | 1.08  | 0.535 |
| 1453324_at   | RIKEN cDNA 6330509M23 gene                                                                   | 6330509M23Rik      | 1.04  | 0.869 | 1.2   | 0.279 | 1.36 | 0.008 | 1.18  | 0.151 | 1.63  | 0.033 |
| 1459302_at   | RIKEN cDNA A030007N12 gene                                                                   | A030007N12Rik      | 1.32  | 0.530 | 1.33  | 0.222 | 1.36 | 0.046 | 2.74  | 0.348 | 1     | 0.736 |
| 1423100_at   | FBJ osteosarcoma oncogene                                                                    | Fos                | -1.01 | 0.953 | 1.62  | 0.005 | 1.36 | 0.029 | 1.46  | 0.003 | 1.53  | 0.003 |
| 1449169_at   | hyaluronan synthase 2                                                                        | Has2               | 1.41  | 0.023 | 1.81  | 0.113 | 1.36 | 0.005 | 1.39  | 0.003 | 1.38  | 0.023 |
| 1449901_a_at | mitogen-activated protein kinase kinase kinase 6                                             | Map3k6             | -1.01 | 0.750 | 1.3   | 0.082 | 1.36 | 0.005 | 1.16  | 0.053 | 1.18  | 0.169 |

|              |                                                                          |                    |       |       |       |       |      |       |       |       |       |       |
|--------------|--------------------------------------------------------------------------|--------------------|-------|-------|-------|-------|------|-------|-------|-------|-------|-------|
| 1423605_a_at | transformed mouse 3T3 cell double minute 2                               | Mdm2               | 1.14  | 0.055 | 1.86  | 0.013 | 1.36 | 0.008 | 1.08  | 0.245 | 1.12  | 0.282 |
| 1448722_s_at | phosphopantothenoylcysteine synthetase                                   | Ppcs               | -1.09 | 0.494 | 1.15  | 0.775 | 1.36 | 0.013 | 1.4   | 0.011 | 1.35  | 0.039 |
| 1426916_at   | secernin 3                                                               | Scrn3              | 1.68  | 0.261 | 1.65  | 0.298 | 1.36 | 0.017 | -1.01 | 0.811 | 1.05  | 0.680 |
| 1447901_x_at | Sfi1 homolog, spindle assembly associated (yeast) /// similar to spin    | Sfi1 /// LOC673420 | 3.53  | 0.447 | 1.6   | 0.594 | 1.36 | 0.025 | 1.33  | 0.265 | 1.18  | 0.955 |
| 1419537_at   | transcription factor EC                                                  | Tcfec              | 2.4   | 0.144 | 1.16  | 0.557 | 1.36 | 0.034 | 1.58  | 0.041 | 1.1   | 0.699 |
| 1436108_at   | thioredoxin domain containing 9                                          | Txndc9             | 1.33  | 0.432 | 1.98  | 0.006 | 1.36 | 0.025 | 1.18  | 0.000 | 1.13  | 0.531 |
| 1460589_at   | zinc finger protein 597                                                  | Zfp597             | 1.37  | 0.912 | 1.21  | 0.870 | 1.36 | 0.021 | -1.08 | 0.247 | 1.55  | 0.077 |
| 1435243_at   | zinc finger protein 746                                                  | Zfp746             | -1.12 | 0.391 | 1.1   | 0.197 | 1.36 | 0.011 | 1.1   | 0.304 | 1.26  | 0.331 |
| 1433946_at   | zinc finger protein interacting with K protein 1                         | Zik1               | 1.13  | 0.031 | 1.44  | 0.041 | 1.36 | 0.002 | 1.22  | 0.041 | 1.23  | 0.015 |
| 1456929_at   | CDNA sequence BC042782                                                   | BC042782           | 3.33  | 0.052 | 2.09  | 0.660 | 1.37 | 0.023 | -1.13 | 0.111 | -1.28 | 0.233 |
| 1419483_at   | complement component 3a receptor 1                                       | C3ar1              | 1.78  | 0.634 | 1.79  | 0.209 | 1.37 | 0.015 | 1.34  | 0.188 | 1.61  | 0.007 |
| 1448364_at   | cyclin G2                                                                | Ccng2              | 4.9   | 0.271 | 5.52  | 0.140 | 1.37 | 0.002 | 1.38  | 0.035 | 1.18  | 0.306 |
| 1448182_a_at | CD24a antigen                                                            | Cd24a              | -1.07 | 0.528 | 1.14  | 0.794 | 1.37 | 0.048 | 1.18  | 0.011 | 1.23  | 0.013 |
| 1454737_at   | dual specificity phosphatase 9                                           | Dusp9              | 1.03  | 0.928 | 1.58  | 0.049 | 1.37 | 0.022 | 1.24  | 0.014 | 1.45  | 0.045 |
| 1435044_at   | early B-cell factor 4                                                    | Ebf4               | -1.29 | 0.217 | -1.18 | 0.314 | 1.37 | 0.002 | 1.73  | 0.101 | -1.24 | 0.266 |
| 1447854_s_at | histone 2, H2be                                                          | Hist2h2be          | -1.2  | 0.399 | -1.21 | 0.397 | 1.37 | 0.018 | 1.03  | 0.971 | 1.2   | 0.605 |
| 1460462_at   | mediator of RNA polymerase II transcription, subunit 18 homolog (ye      | Med18              | -1.29 | 0.232 | -1.3  | 0.195 | 1.37 | 0.029 | 1.13  | 0.689 | 1.43  | 0.348 |
| 1435170_at   | TSR2, 20S rRNA accumulation, homolog (S. cerevisiae)                     | Tsr2               | 1.19  | 0.633 | 1.48  | 0.260 | 1.37 | 0.033 | 1.07  | 0.397 | 1.36  | 0.269 |
| 1434552_at   | WD repeat domain 77                                                      | Wdr77              | -1.1  | 0.347 | 1.2   | 0.335 | 1.37 | 0.000 | 1.3   | 0.001 | 1.34  | 0.000 |
| 1449915_at   | zinc finger protein 202                                                  | Zfp202             | -1.06 | 0.560 | -1.13 | 0.477 | 1.37 | 0.034 | 1.19  | 0.363 | 1.1   | 0.325 |
| 1459323_at   | RIKEN cDNA 1700106N22 gene                                               | 1700106N22Rik      | 1.6   | 0.631 | -1.22 | 0.412 | 1.38 | 0.028 | -1.19 | 0.292 | -1.18 | 0.224 |
| 1453025_at   | RIKEN cDNA 2900006F19 gene                                               | 2900006F19Rik      | -1.22 | 0.225 | -1.28 | 0.258 | 1.38 | 0.036 | -1.01 | 0.748 | -1.09 | 0.415 |
| 1430481_at   | RIKEN cDNA 4930545L23 gene                                               | 4930545L23Rik      | 1.46  | 0.554 | 2.19  | 0.049 | 1.38 | 0.005 | 1.45  | 0.673 | 1.29  | 0.489 |
| 1438760_x_at | a disintegrin and metalloproteinase domain 15 (metargidin)               | Adam15             | -1.24 | 0.176 | -1.22 | 0.153 | 1.38 | 0.027 | -1.07 | 0.519 | -1.1  | 0.434 |
| 1456404_at   | a disintegrin-like and metalloproteinase (reprolysin type) with thromb   | Adams5             | -1    | 0.954 | 1.11  | 0.347 | 1.38 | 0.006 | 1.13  | 0.181 | 1.21  | 0.116 |
| 1427954_at   | cDNA sequence BC048403                                                   | BC048403           | 1.42  | 0.651 | 1.57  | 0.291 | 1.38 | 0.047 | -1.06 | 0.442 | 1.2   | 0.058 |
| 1418954_at   | calcium/calmodulin-dependent protein kinase kinase 1, alpha              | Camkk1             | 1.76  | 0.343 | 1.81  | 0.595 | 1.38 | 0.015 | 1     | 0.886 | 1.14  | 0.329 |
| 1450554_at   | defensin beta 2                                                          | Defb2              | -1.29 | 0.277 | -1.02 | 0.584 | 1.38 | 0.016 | -1.43 | 0.299 | -1.09 | 0.459 |
| 1418434_at   | makorin, ring finger protein, 1                                          | Mkrn1              | 1.09  | 0.975 | 1.34  | 0.634 | 1.38 | 0.014 | 1.05  | 0.518 | 1.56  | 0.098 |
| 1417857_at   | methylmalonic aciduria (cobalamin deficiency) type A                     | Mmaa               | 1.12  | 0.753 | 1.26  | 0.282 | 1.38 | 0.012 | -1    | 0.950 | 1.17  | 0.295 |
| 1420502_at   | spermidine/spermine N1-acetyl transferase 1                              | Sat1               | 1.29  | 0.135 | 1.7   | 0.006 | 1.38 | 0.014 | 1.27  | 0.011 | 1.32  | 0.006 |
| 1436871_at   | splicing factor, arginine/serine-rich 7                                  | Sfrs7              | 1.14  | 0.107 | 1.23  | 0.383 | 1.38 | 0.028 | 1.11  | 0.411 | 1.2   | 0.277 |
| 1439368_a_at | solute carrier family 9 (sodium/hydrogen exchanger), isoform 3 regul     | Slc9a3r2           | -1.17 | 0.423 | -1.03 | 0.526 | 1.38 | 0.010 | 1.1   | 0.063 | 1.18  | 0.017 |
| 1451339_at   | sulfite oxidase                                                          | Suox               | 5.26  | 0.543 | 8.31  | 0.070 | 1.38 | 0.039 | 1.26  | 0.024 | 1.42  | 0.004 |
| 1451856_at   | trinucleotide repeat containing 15                                       | Tnrc15             | 1.02  | 0.580 | -1.28 | 0.321 | 1.38 | 0.002 | 1.41  | 0.486 | 2.56  | 0.826 |
| 1451268_at   | translocation associated membrane protein 1-like 1                       | Tram11             | 1.21  | 0.752 | 1.81  | 0.059 | 1.38 | 0.012 | 1.26  | 0.180 | 1.41  | 0.027 |
| 1434128_a_at | zinc finger protein 574                                                  | Zfp574             | -1.26 | 0.281 | -1.06 | 0.630 | 1.38 | 0.025 | 1.17  | 0.044 | 1.34  | 0.024 |
| 1453534_at   | RIKEN cDNA 2810004I08 gene                                               | 2810004I08Rik      | 1.17  | 0.507 | 1.3   | 0.028 | 1.39 | 0.038 | 1.42  | 0.567 | 1.15  | 0.843 |
| 1454799_at   | RIKEN cDNA A230097K15 gene                                               | A230097K15Rik      | 1.59  | 0.003 | 1.33  | 0.165 | 1.39 | 0.016 | -1.03 | 0.656 | 1.14  | 0.445 |
| 1449734_s_at | Bardet-Biedl syndrome 4 homolog (human)                                  | Bbs4               | 1.48  | 0.225 | 1.28  | 0.721 | 1.39 | 0.003 | -1.18 | 0.311 | 1.15  | 0.856 |
| 1435448_at   | BCL2-like 11 (apoptosis facilitator)                                     | Bcl2l11            | -1.2  | 0.336 | 1.26  | 0.236 | 1.39 | 0.020 | 1.28  | 0.007 | 1.54  | 0.001 |
| 1426281_at   | cation channel of sperm 1                                                | Catsper1           | 2.67  | 0.239 | 2.36  | 0.155 | 1.39 | 0.027 | -1.06 | 0.903 | 1.62  | 0.443 |
| 1417581_at   | dihydroorotate dehydrogenase                                             | Dhodh              | 1.26  | 0.239 | 1.57  | 0.183 | 1.39 | 0.029 | 1.04  | 0.565 | 1.23  | 0.430 |
| 1429914_at   | enhancer of polycomb homolog 1 (Drosophila)                              | Epc1               | -1.1  | 0.492 | 1.07  | 0.879 | 1.39 | 0.023 | 1.2   | 0.154 | 1.32  | 0.026 |
| 1433489_s_at | fibroblast growth factor receptor 2                                      | Fgfr2              | 1.14  | 0.577 | 1.25  | 0.001 | 1.39 | 0.029 | 1.02  | 0.886 | 1.05  | 0.964 |
| 1425937_a_at | hexamethylene bis-acetamide inducible 1                                  | Hexim1             | 1.05  | 0.729 | 1.52  | 0.009 | 1.39 | 0.015 | 1.49  | 0.002 | 1.41  | 0.015 |
| 1437999_x_at | phosphatidylinositol glycan anchor biosynthesis, class Q                 | Pigq               | -1.27 | 0.369 | -1.19 | 0.393 | 1.39 | 0.012 | -1.09 | 0.177 | -1.03 | 0.680 |
| 1425245_a_at | regulator of G-protein signaling 11                                      | Rgs11              | 1.56  | 0.790 | -1.16 | 0.292 | 1.39 | 0.040 | 1.03  | 0.801 | 1.39  | 0.577 |
| 1454857_at   | ring finger protein 122                                                  | Rnf122             | 3     | 0.333 | 4.85  | 0.042 | 1.39 | 0.024 | 1.58  | 0.034 | 1.83  | 0.017 |
| 1446687_at   | splicing factor 3a, subunit 1                                            | Sf3a1              | 1.1   | 0.856 | 1     | 0.686 | 1.39 | 0.031 | 1.67  | 0.016 | 1.03  | 0.980 |
| 1449579_at   | Sh3 domain YSC-like 1                                                    | Sh3yl1             | 1.05  | 0.954 | 1     | 0.782 | 1.39 | 0.015 | 1.12  | 0.330 | 1.13  | 0.418 |
| 1439507_at   | TRAF type zinc finger domain containing 1                                | Traf1              | 1.87  | 0.443 | -1.21 | 0.284 | 1.39 | 0.030 | 1.95  | 0.400 | 1.08  | 0.482 |
| 1434401_at   | zinc finger, CCHC domain containing 2                                    | Zcchc2             | 1.18  | 0.364 | 1.39  | 0.037 | 1.39 | 0.027 | 1.11  | 0.140 | 1.03  | 0.845 |
| 1456603_at   | RIKEN cDNA 1500005K14 gene                                               | 1500005K14Rik      | -1.12 | 0.460 | 1.31  | 0.753 | 1.4  | 0.024 | 1.2   | 0.067 | 1.25  | 0.199 |
| 1429364_at   | RIKEN cDNA 4930579G24 gene                                               | 4930579G24Rik      | 1.01  | 0.767 | 1.21  | 0.021 | 1.4  | 0.037 | 1.27  | 0.036 | 1.27  | 0.003 |
| 1456660_at   | colony stimulating factor 2 receptor, beta 1, low-affinity (granulocyte- | Csf2rb1            | -1.42 | 0.156 | -1.88 | 0.046 | 1.4  | 0.033 | -1    | 0.635 | -1.26 | 0.651 |
| 1439153_at   | IBR domain containing 2                                                  | Ildr2              | -1.1  | 0.337 | -1.06 | 0.603 | 1.4  | 0.001 | 1.08  | 0.730 | -1.55 | 0.008 |
| 1456909_at   | similar to Glucose-6-phosphate isomerase (GPI) (Phosphoglucose is        | LOC676974          | -1.34 | 0.256 | 1.16  | 0.898 | 1.4  | 0.019 | 1.04  | 0.397 | 1.18  | 0.246 |

|              |                                                                                                   |                    |       |       |       |       |      |       |       |       |       |       |
|--------------|---------------------------------------------------------------------------------------------------|--------------------|-------|-------|-------|-------|------|-------|-------|-------|-------|-------|
| 1460254_at   | RIKEN cDNA 1810049H13 gene                                                                        | 1810049H13Rik      | 1.23  | 0.990 | 1.31  | 0.439 | 1.41 | 0.032 | 1.06  | 0.682 | 1.15  | 0.722 |
| 1426929_at   | bruno-like 4, RNA binding protein (Drosophila)                                                    | Brunol4            | -1.08 | 0.520 | 1.14  | 0.396 | 1.41 | 0.042 | -1.06 | 0.558 | 1.1   | 0.570 |
| 1438370_x_at | downstream of Sltk11                                                                              | Dos                | 1     | 0.958 | 1.44  | 0.010 | 1.41 | 0.022 | 1.12  | 0.078 | 1.64  | 0.070 |
| 1439790_at   | serine (or cysteine) peptidase inhibitor, clade B, member 9                                       | Serpnb9            | -1.01 | 0.624 | 1.46  | 0.592 | 1.41 | 0.010 | 1.1   | 0.547 | 1.22  | 0.536 |
| 1434588_x_at | tubulin cofactor a /// similar to Tubulin-specific chaperone A (Tubulin                           | Tbca /// LOC62031  | -1.16 | 0.431 | 1.03  | 0.620 | 1.41 | 0.008 | -1.1  | 0.570 | -1.05 | 0.701 |
| 1453739_at   | transmembrane protein 126B                                                                        | Tmem126b           | 1.8   | 0.254 | 2.22  | 0.048 | 1.41 | 0.038 | 1.44  | 0.298 | 1.45  | 0.035 |
| 1424004_x_at | RIKEN cDNA 4930444A02 gene                                                                        | 4930444A02Rik      | -1.11 | 0.257 | 1.29  | 0.442 | 1.42 | 0.021 | 1.29  | 0.123 | 1.41  | 0.127 |
| 1457461_at   | RIKEN cDNA A630039O03 gene                                                                        | A630039O03Rik      | 1.17  | 0.384 | 1.33  | 0.577 | 1.42 | 0.011 | -1.01 | 0.830 | 1.29  | 0.464 |
| 1452273_at   | expressed sequence AA409316                                                                       | AA409316           | 1.23  | 0.209 | 1.58  | 0.035 | 1.42 | 0.014 | 1.3   | 0.012 | 1.55  | 0.033 |
| 1447974_s_at | aquaporin 6                                                                                       | Aqp6               | 1.31  | 0.591 | 1.23  | 0.724 | 1.42 | 0.041 | 1.51  | 0.510 | 1.95  | 0.239 |
| 1458436_at   | AU RNA binding protein/enoyl-coenzyme A hydratase                                                 | Auh                | -1.34 | 0.171 | 1.08  | 0.433 | 1.42 | 0.010 | 1.2   | 0.344 | 1.13  | 0.217 |
| 1417078_at   | lectin, galactose-binding, soluble 2                                                              | Lgals2             | 1.83  | 0.918 | -1.6  | 0.150 | 1.42 | 0.012 | 1.03  | 0.953 | 1.29  | 0.217 |
| 1434079_s_at | minichromosome maintenance deficient 2 mitotin (S. cerevisiae)                                    | Mcm2               | 1.09  | 0.813 | 1.31  | 0.143 | 1.42 | 0.018 | 1.23  | 0.469 | 1.21  | 0.064 |
| 1418203_at   | phorbol-12-myristate-13-acetate-induced protein 1                                                 | Pmaip1             | 1.33  | 0.093 | 2.85  | 0.020 | 1.42 | 0.015 | 1.22  | 0.008 | 1.68  | 0.090 |
| 1419245_at   | RAB14, member RAS oncogene family                                                                 | Rab14              | 1.03  | 0.970 | 1     | 0.857 | 1.42 | 0.023 | -1.3  | 0.259 | 1.18  | 0.913 |
| 1460667_at   | cDNA sequence U90926                                                                              | U90926             | 1.14  | 0.686 | 1.44  | 0.018 | 1.42 | 0.029 | -1    | 0.945 | 1.06  | 0.874 |
| 1419207_at   | zinc finger protein 37                                                                            | Zfp37              | 1.13  | 0.511 | 1.28  | 0.166 | 1.42 | 0.014 | 1.28  | 0.114 | 1.38  | 0.022 |
| 1441703_at   | RIKEN cDNA 2210018M03 gene                                                                        | 2210018M03Rik      | -1.26 | 0.293 | 1.22  | 0.713 | 1.43 | 0.020 | 1.7   | 0.479 | 1.07  | 0.740 |
| 1426217_at   | RIKEN cDNA 2810441K11 gene                                                                        | 2810441K11Rik      | 1.53  | 0.201 | 1.72  | 0.047 | 1.43 | 0.026 | 1.29  | 0.096 | 1.2   | 0.169 |
| 1458667_at   | RIKEN cDNA 4930519N13 gene                                                                        | 4930519N13Rik      | -1.17 | 0.353 | 1.17  | 0.678 | 1.43 | 0.003 | 1.02  | 0.898 | 1.5   | 0.048 |
| 1454192_at   | RIKEN cDNA 4930579C15 gene                                                                        | 4930579C15Rik      | 1.43  | 0.814 | -1.34 | 0.067 | 1.43 | 0.025 | 1.04  | 0.856 | 1.46  | 0.809 |
| 1450855_at   | armadillo repeat gene deleted in velo-cardio-facial syndrome                                      | Arvcf              | 1.43  | 0.188 | 1.66  | 0.109 | 1.43 | 0.038 | 1.5   | 0.054 | 1.08  | 0.659 |
| 1427210_at   | bromodomain adjacent to zinc finger domain, 2A                                                    | Baz2a              | -1.42 | 0.273 | -1.39 | 0.302 | 1.43 | 0.020 | -1.27 | 0.209 | 1.29  | 0.763 |
| 1424074_at   | basic transcription factor 3-like 4                                                               | Btf3l4             | -1.01 | 0.894 | 1.17  | 0.209 | 1.43 | 0.005 | 1.4   | 0.036 | 1.4   | 0.328 |
| 1448272_at   | B-cell translocation gene 2, anti-proliferative                                                   | Btg2               | 1.23  | 0.153 | 1.94  | 0.048 | 1.43 | 0.018 | 1.09  | 0.254 | 1.25  | 0.187 |
| 1428838_a_at | deoxycytidine kinase                                                                              | Dck                | 2.38  | 0.032 | 2.79  | 0.006 | 1.43 | 0.032 | 1.29  | 0.301 | 1.24  | 0.325 |
| 1436487_x_at | F-box and WD-40 domain protein 2                                                                  | Fbxw2              | -1.13 | 0.427 | 1.49  | 0.674 | 1.43 | 0.042 | -1    | 0.592 | 1.03  | 0.729 |
| 1425322_at   | interferon zeta /// similar to interferon zeta /// similar to interferon zeta: lfnz /// LOC435791 | Ilnz /// LOC435791 | -1.09 | 0.518 | 1.41  | 0.163 | 1.43 | 0.015 | 1.25  | 0.056 | 1.41  | 0.016 |
| 1422132_at   | 5,10-methylenetetrahydrofolate reductase                                                          | Mthfr              | 2.69  | 0.315 | 1.51  | 0.407 | 1.43 | 0.043 | 1.16  | 0.694 | 1.09  | 0.434 |
| 1424412_at   | opioid growth factor receptor-like 1                                                              | Ogfrl1             | -1.08 | 0.335 | 1.27  | 0.102 | 1.43 | 0.023 | -1.09 | 0.264 | 1.4   | 0.630 |
| 1453006_at   | RIKEN cDNA 2610306H15 gene                                                                        | 2610306H15Rik      | 1.09  | 0.348 | 1.57  | 0.040 | 1.44 | 0.036 | 1.26  | 0.000 | 1.57  | 0.006 |
| 1453642_at   | RIKEN cDNA 6530411M01 gene                                                                        | 6530411M01Rik      | 1.92  | 0.234 | 1.65  | 0.197 | 1.44 | 0.042 | -1.03 | 0.564 | 1.79  | 0.725 |
| 1457092_at   | RIKEN cDNA C630007B19 gene                                                                        | C630007B19Rik      | 1.36  | 0.739 | 1.81  | 0.920 | 1.44 | 0.005 | -1.04 | 0.477 | 1.78  | 0.185 |
| 1459840_s_at | coiled coil domain containing 28B                                                                 | Ccdc28b            | 1     | 0.482 | 1.27  | 0.549 | 1.44 | 0.040 | -1.03 | 0.644 | 1.41  | 0.352 |
| 1417441_at   | DnaJ (Hsp40) homolog, subfamily C, member 12                                                      | Dnajc12            | -1.02 | 0.796 | -1.01 | 0.994 | 1.44 | 0.047 | -1.03 | 0.586 | 1.39  | 0.039 |
| 1434027_at   | Down syndrome critical region gene 1-like 2                                                       | Dscr12             | 1.1   | 0.354 | -1.01 | 0.798 | 1.44 | 0.037 | 1.19  | 0.006 | 1.26  | 0.027 |
| 1440741_at   | 5-hydroxytryptamine (serotonin) receptor 1D                                                       | Htr1d              | -1.28 | 0.340 | -1.16 | 0.534 | 1.44 | 0.004 | 1.15  | 0.495 | 1.05  | 0.990 |
| 1428615_at   | purinergic receptor P2Y, G-protein coupled, 5                                                     | P2ry5              | 1.24  | 0.018 | 1.7   | 0.043 | 1.44 | 0.019 | 1.35  | 0.009 | 1.52  | 0.011 |
| 1453864_at   | retinol dehydrogenase 14 (all-trans and 9-cis)                                                    | Rdh14              | -1.06 | 0.457 | 1.15  | 0.585 | 1.44 | 0.022 | 1.02  | 0.824 | 1.06  | 0.769 |
| 1457051_at   | tripartite motif protein 27                                                                       | Trim27             | 2.13  | 0.047 | 1.8   | 0.555 | 1.44 | 0.007 | 1.18  | 0.859 | 2.22  | 0.010 |
| 1421465_at   | wingless related MMTV integration site 2b                                                         | Wnt2b              | 1.85  | 0.140 | 1.21  | 0.980 | 1.44 | 0.025 | -1.64 | 0.264 | 1.5   | 0.362 |
| 1437617_x_at | RIKEN cDNA 1110034G24 gene                                                                        | 1110034G24Rik      | 1.03  | 0.618 | 1.32  | 0.860 | 1.45 | 0.007 | -1.67 | 0.016 | 1.36  | 0.019 |
| 1433582_at   | RIKEN cDNA 1190002N15 gene                                                                        | 1190002N15Rik      | 1.6   | 0.203 | 2.14  | 0.039 | 1.45 | 0.015 | 1.24  | 0.030 | 1.13  | 0.156 |
| 1453431_at   | RIKEN cDNA 2610206C17 gene                                                                        | 2610206C17Rik      | 6     | 0.265 | 3.32  | 0.217 | 1.45 | 0.050 | -1.01 | 0.820 | 1.3   | 0.845 |
| 1419612_at   | RIKEN cDNA 4632415L05 gene                                                                        | 4632415L05Rik      | 1.46  | 0.085 | 1.58  | 0.089 | 1.45 | 0.048 | 1.22  | 0.277 | 1.63  | 0.011 |
| 1458863_at   | RIKEN cDNA 6330415G19 gene                                                                        | 6330415G19Rik      | 1.51  | 0.144 | 1.72  | 0.010 | 1.45 | 0.007 | 1.34  | 0.123 | 2.68  | 0.024 |
| 1460745_at   | RIKEN cDNA A630098A13 gene                                                                        | A630098A13Rik      | 1.11  | 0.746 | 1.52  | 0.418 | 1.45 | 0.029 | 1.13  | 0.435 | 1.32  | 0.251 |
| 1448199_at   | ankyrin repeat domain 10                                                                          | Ankrd10            | -1.06 | 0.126 | 1.55  | 0.005 | 1.45 | 0.019 | 1.24  | 0.040 | 1.39  | 0.049 |
| 1433575_at   | similar to Transcription factor SOX-4                                                             | LOC672274          | 1.53  | 0.189 | 2.22  | 0.048 | 1.45 | 0.012 | 1.39  | 0.011 | 1.56  | 0.000 |
| 1418540_a_at | protein tyrosine phosphatase, receptor type, E                                                    | Ptpre              | 1.13  | 0.198 | 1.2   | 0.504 | 1.45 | 0.016 | 1.15  | 0.220 | 1.18  | 0.500 |
| 1431740_at   | solute carrier family 7, (cationic amino acid transporter, y+ system) n                           | Slc7a13            | -1.15 | 0.516 | -1.36 | 0.324 | 1.45 | 0.037 | 1.26  | 0.220 | 1.01  | 0.512 |
| 1444053_at   | single-stranded DNA binding protein 1                                                             | Ssbp1              | -1.82 | 0.239 | -1.98 | 0.256 | 1.45 | 0.038 | -2.12 | 0.068 | 1.03  | 0.560 |
| 1435464_at   | RIKEN cDNA 1110003E01 gene                                                                        | 1110003E01Rik      | -1.18 | 0.318 | -1.4  | 0.153 | 1.46 | 0.000 | 1.07  | 0.376 | 1.21  | 0.100 |
| 1430992_s_at | RIKEN cDNA 1500009M05 gene                                                                        | 1500009M05Rik      | 1.29  | 0.072 | 1.31  | 0.107 | 1.46 | 0.034 | 1.1   | 0.182 | 1.57  | 0.073 |
| 1457260_at   | RIKEN cDNA 7530403E16 gene                                                                        | 7530403E16Rik      | -1.02 | 0.552 | 1.14  | 0.596 | 1.46 | 0.004 | 1.4   | 0.024 | 1.29  | 0.182 |
| 1441312_at   | Cyclin M1                                                                                         | Cnnm1              | 1.26  | 0.192 | 1.33  | 0.434 | 1.46 | 0.003 | -1.09 | 0.469 | 1.05  | 0.578 |
| 1423525_at   | microtubule associated serine/threonine kinase-like                                               | Mastl              | 2.66  | 0.377 | 3.91  | 0.514 | 1.46 | 0.007 | 1.02  | 0.910 | 1.34  | 0.021 |
| 1455238_at   | melanoma associated antigen (mutated) 1-like 1                                                    | Mum11              | 1.36  | 0.100 | 1.63  | 0.045 | 1.46 | 0.009 | 1.4   | 0.011 | 1.1   | 0.240 |

|              |                                                                       |                    |       |       |       |       |      |       |       |       |       |       |
|--------------|-----------------------------------------------------------------------|--------------------|-------|-------|-------|-------|------|-------|-------|-------|-------|-------|
| 1431993_a_at | ring finger protein 38                                                | Rnf38              | 7.85  | 0.497 | 7.68  | 0.457 | 1.46 | 0.047 | 1.14  | 0.270 | 1.21  | 0.392 |
| 1421012_at   | signal recognition particle receptor, B subunit                       | Srprb              | -1.18 | 0.393 | 1.25  | 0.745 | 1.46 | 0.013 | 1.3   | 0.024 | 1.33  | 0.133 |
| 1437792_at   | RIKEN cDNA 1700013D24 gene                                            | 1700013D24Rik      | -1.25 | 0.323 | 1.7   | 0.969 | 1.47 | 0.023 | 1.92  | 0.342 | 1.39  | 0.982 |
| 1420482_at   | cyclin M3                                                             | Cnnm3              | -1.63 | 0.096 | -1.02 | 0.831 | 1.47 | 0.001 | 1.1   | 0.418 | 1.9   | 0.096 |
| 1419234_at   | helicase (DNA) B                                                      | Helb               | 4.19  | 0.085 | 6.26  | 0.025 | 1.47 | 0.031 | 1.31  | 0.058 | 1.28  | 0.386 |
| 1429110_a_at | NOL1/NOP2/Sun domain family, member 4                                 | Nsun4              | 1.51  | 0.097 | 1.83  | 0.026 | 1.47 | 0.012 | 1.46  | 0.012 | 1.38  | 0.086 |
| 1448369_at   | polymerase (DNA directed), alpha 2                                    | Pola2              | 1.51  | 0.175 | 1.51  | 0.024 | 1.47 | 0.007 | 1.39  | 0.160 | 1.43  | 0.030 |
| 1448923_at   | protein kinase, interferon inducible double stranded RNA dependent    | Prkra              | -1    | 0.872 | -1.05 | 0.551 | 1.47 | 0.048 | 1.14  | 0.028 | 1.02  | 0.984 |
| 1416400_at   | pyrroline-5-carboxylate reductase-like                                | Pycrl              | 1.14  | 0.225 | 1.45  | 0.008 | 1.47 | 0.015 | 1.22  | 0.062 | 1.4   | 0.071 |
| 1418545_at   | WASP family 1                                                         | Wasf1              | -1.36 | 0.270 | -1.19 | 0.355 | 1.47 | 0.003 | 1.15  | 0.086 | 1.34  | 0.046 |
| 1453422_a_at | RIKEN cDNA 1110020G09 gene                                            | 1110020G09Rik      | 4.08  | 0.191 | 3.49  | 0.014 | 1.48 | 0.033 | 1.23  | 0.166 | 1.16  | 0.244 |
| 1449197_at   | RIKEN cDNA 2310040A13 gene                                            | 2310040A13Rik      | 1.19  | 0.530 | 1.08  | 0.947 | 1.48 | 0.008 | 1.04  | 0.739 | 1.31  | 0.078 |
| 1431989_at   | RIKEN cDNA 4930433E13 gene                                            | 4930433E13Rik      | -1.49 | 0.200 | -1.04 | 0.940 | 1.48 | 0.029 | 1.01  | 0.910 | 1.25  | 0.233 |
| 1455346_at   | mannan-binding lectin serine peptidase 1                              | Masp1              | 1.38  | 0.728 | -1.01 | 0.665 | 1.48 | 0.004 | 1.01  | 0.803 | 1.89  | 0.840 |
| 1455877_a_at | nanos homolog 1 (Drosophila)                                          | Nanos1             | -1.09 | 0.434 | 1.42  | 0.682 | 1.48 | 0.048 | 1.25  | 0.163 | 1.45  | 0.043 |
| 1416505_at   | nuclear receptor subfamily 4, group A, member 1                       | Nr4a1              | 1.34  | 0.031 | 2.01  | 0.033 | 1.48 | 0.004 | 1.38  | 0.001 | 1.56  | 0.010 |
| 1429399_at   | ring finger protein 125                                               | Rnf125             | -1.36 | 0.067 | -1.21 | 0.181 | 1.48 | 0.050 | 1.37  | 0.008 | 1.49  | 0.054 |
| 1441756_at   | Transcription factor 7-like 2, T-cell specific, HMG-box               | Tcf7l2             | -1.31 | 0.356 | -1.25 | 0.383 | 1.48 | 0.046 | -1.19 | 0.351 | 1.12  | 0.962 |
| 1429320_at   | RIKEN cDNA 4921511116 gene                                            | 4921511116Rik      | 1.33  | 0.259 | 1.56  | 0.077 | 1.49 | 0.046 | 1.02  | 0.933 | 1.15  | 0.384 |
| 1429642_at   | AN1, ubiquitin-like, homolog (Xenopus laevis)                         | Anub1              | 1.15  | 0.857 | -1    | 0.751 | 1.49 | 0.020 | 1.26  | 0.605 | 1.52  | 0.089 |
| 1428069_at   | cell division cycle associated 7                                      | Cdca7              | 1.26  | 0.680 | 1.67  | 0.007 | 1.49 | 0.040 | 1.09  | 0.294 | 1.37  | 0.010 |
| 1436011_at   | engulfment and cell motility 2, ced-12 homolog (C. elegans)           | Elmo2              | -1.2  | 0.238 | 1.07  | 0.972 | 1.49 | 0.004 | 1.24  | 0.038 | 1.16  | 0.406 |
| 1428532_at   | integrator complex subunit 7                                          | Ints7              | 1.37  | 0.386 | 1.42  | 0.049 | 1.49 | 0.045 | 1.11  | 0.424 | 1.41  | 0.030 |
| 1454844_at   | melanin-concentrating hormone receptor 1                              | Mchr1              | 1.36  | 0.974 | 1.87  | 0.672 | 1.49 | 0.041 | 1.19  | 0.611 | 1.47  | 0.171 |
| 1416159_at   | nuclear receptor subfamily 2, group F, member 2                       | Nr2f2              | 1.19  | 0.206 | 1.17  | 0.853 | 1.49 | 0.011 | -1.03 | 0.622 | 1.19  | 0.083 |
| 1438138_a_at | peroxisomal biogenesis factor 6                                       | Pex6               | -1.53 | 0.178 | -1.12 | 0.399 | 1.49 | 0.007 | -1.02 | 0.566 | -1.03 | 0.781 |
| 1439934_at   | solute carrier family 30, member 10                                   | Slc30a10           | 2.59  | 0.236 | 2.01  | 0.761 | 1.49 | 0.017 | -1.75 | 0.093 | 1.54  | 0.097 |
| 1422933_at   | X-linked lymphocyte-regulated 5D /// similar to X-linked lymphocyte-1 | Xlr5d /// LOC62708 | -1.42 | 0.225 | -1.22 | 0.498 | 1.49 | 0.021 | 2.07  | 0.867 | 1.45  | 0.078 |
| 1423594_a_at | endothelin receptor type B                                            | Ednrb              | 1.16  | 0.826 | 1.06  | 0.995 | 1.5  | 0.012 | 1.44  | 0.680 | 1.31  | 0.966 |
| 1417602_at   | period homolog 2 (Drosophila)                                         | Per2               | 1.14  | 0.813 | 2.35  | 0.056 | 1.5  | 0.009 | -1.01 | 0.821 | 1.11  | 0.496 |
| 1450653_at   | spermatogenic Zip 1                                                   | Spz1               | 2.15  | 0.934 | 1.53  | 0.656 | 1.5  | 0.050 | 1.26  | 0.590 | 1.27  | 0.988 |
| 1439407_x_at | transgelin 2 /// similar to transgelin 2                              | Tagln2 /// LOC6724 | 1.11  | 0.089 | 1     | 0.979 | 1.5  | 0.043 | -1.05 | 0.613 | 1.01  | 0.648 |
| 1421707_at   | transmembrane channel-like gene family 2                              | Tmc2               | -2.2  | 0.107 | 1.38  | 0.931 | 1.5  | 0.032 | 2.59  | 0.229 | 1.86  | 0.692 |
| 1452006_x_at | zinc finger and BTB domain containing 8 opposite strand               | Zbtb8os            | 1.26  | 0.820 | 1.36  | 0.654 | 1.5  | 0.001 | -1.11 | 0.489 | 2.71  | 0.118 |
| 1432013_a_at | RIKEN cDNA 2610016C23 gene                                            | 2610016C23Rik      | 1.34  | 0.050 | 1.75  | 0.165 | 1.51 | 0.023 | 1.29  | 0.043 | 1.18  | 0.241 |
| 1433354_at   | RIKEN cDNA D530015H24 gene                                            | D530015H24Rik      | -1.16 | 0.519 | -1.18 | 0.513 | 1.51 | 0.033 | 2.59  | 0.233 | 2.18  | 0.358 |
| 1424897_at   | G protein-coupled receptor 85                                         | Gpr85              | -1.01 | 0.484 | 1.74  | 0.682 | 1.51 | 0.003 | 1.16  | 0.390 | 1.62  | 0.927 |
| 1435977_at   | hepatoma-derived growth factor, related protein 3                     | Hdgfrp3            | 1.13  | 0.295 | 1.13  | 0.595 | 1.51 | 0.027 | 2     | 0.205 | 1.05  | 0.747 |
| 1415977_at   | myo-inositol 1-phosphate synthase A1                                  | Isyna1             | 2.14  | 0.309 | 2.13  | 0.350 | 1.51 | 0.001 | 1.22  | 0.052 | 1.24  | 0.160 |
| 1416915_at   | mutS homolog 6 (E. coli)                                              | Msh6               | 1.1   | 0.060 | 2.15  | 0.000 | 1.51 | 0.047 | 1.47  | 0.029 | 1.4   | 0.023 |
| 1421328_at   | microtubule-associated protein 2 /// hypothetical protein A730034C0   | Mtap2 /// A730034C | 1.17  | 0.792 | 1.82  | 0.349 | 1.51 | 0.028 | 3.01  | 0.066 | 1.13  | 0.368 |
| 1419929_at   | DNA segment, Chr 15, ERATO Doi 55, expressed                          | D15Erd55e          | 1.08  | 0.673 | 1.06  | 0.929 | 1.52 | 0.018 | 1.03  | 0.627 | 1.18  | 0.771 |
| 1442182_at   | DnaJ (Hsp40) homolog, subfamily C, member 19                          | Dnajc19            | 1.1   | 0.937 | 1.45  | 0.662 | 1.52 | 0.026 | 1.8   | 0.049 | 1.63  | 0.118 |
| 1452700_s_at | kelch repeat and BTB (POZ) domain containing 7                        | Kbtbd7             | -1.03 | 0.673 | 1.55  | 0.008 | 1.52 | 0.005 | 1.29  | 0.083 | 1.58  | 0.025 |
| 1423231_at   | neurogranin                                                           | Nrgn               | 2     | 0.527 | 2.88  | 0.009 | 1.52 | 0.006 | 2.04  | 0.850 | -1.18 | 0.803 |
| 1457468_at   | Tankyrase, TRF1-interacting ankyrin-related ADP-ribose polymerase     | Tnks2              | 1.79  | 0.319 | -1.2  | 0.311 | 1.52 | 0.011 | 1.31  | 0.382 | -1.03 | 0.276 |
| 1451323_at   | zinc finger protein 7                                                 | Zip7               | 1.25  | 0.645 | 1.71  | 0.062 | 1.52 | 0.002 | 1.49  | 0.006 | 1.61  | 0.046 |
| 1433163_at   | RIKEN cDNA 6230414M07 gene                                            | 6230414M07Rik      | 1.71  | 0.694 | 1.29  | 0.660 | 1.53 | 0.024 | 1.12  | 0.725 | 1.11  | 0.856 |
| 1454858_x_at | methyltransferase like 7A                                             | Mettl7a            | 1.08  | 0.681 | 1.44  | 0.227 | 1.53 | 0.026 | 1.11  | 0.862 | -1.02 | 0.778 |
| 1441412_s_at | tripartite motif-containing 45                                        | Trim45             | -1.05 | 0.493 | -1.07 | 0.532 | 1.53 | 0.014 | 1.39  | 0.015 | 1.17  | 0.189 |
| 1418100_at   | RIKEN cDNA A030009H04 gene                                            | A030009H04Rik      | 1.18  | 0.496 | 2.52  | 0.059 | 1.54 | 0.003 | 1.76  | 0.031 | 1.88  | 0.110 |
| 1458930_at   | alpha-1,4-N-acetylglucosaminyltransferase                             | A4gnt              | 1.08  | 0.306 | -1.11 | 0.585 | 1.54 | 0.027 | 1.42  | 0.158 | 1.66  | 0.471 |
| 1449093_at   | cardiotrophin 1                                                       | Ctrf1              | -1    | 0.945 | 1.37  | 0.353 | 1.54 | 0.026 | 1.09  | 0.119 | 1.26  | 0.131 |
| 1460206_at   | GRP1 (general receptor for phosphoinositides 1)-associated scaffold   | Grasp              | 6.01  | 0.281 | 7.21  | 0.134 | 1.54 | 0.046 | 1.32  | 0.014 | 1.19  | 0.173 |
| 1452645_x_at | killer cell lectin-like receptor subfamily A, member 22               | Klra22             | 1.54  | 0.311 | -1.03 | 0.631 | 1.54 | 0.014 | -1.04 | 0.894 | -1.06 | 0.426 |
| 1430559_at   | 5'-nucleotidase, cytosolic III-like                                   | Nt5c3l             | 4.27  | 0.531 | 2.47  | 0.501 | 1.54 | 0.034 | 1.01  | 0.812 | -1.05 | 0.830 |
| 1435911_s_at | solute carrier family 2 (facilitated glucose transporter), member 12  | Slc2a12            | -1.14 | 0.526 | -1.13 | 0.332 | 1.54 | 0.047 | -1.18 | 0.519 | -1.05 | 0.929 |
| 1453502_at   | RIKEN cDNA 2210408I21 gene                                            | 2210408I21Rik      | 2.08  | 0.813 | 1.34  | 0.575 | 1.55 | 0.039 | -1.28 | 0.042 | -1.1  | 0.422 |

|              |                                                                       |                   |       |       |       |       |      |       |       |       |       |       |
|--------------|-----------------------------------------------------------------------|-------------------|-------|-------|-------|-------|------|-------|-------|-------|-------|-------|
| 1428499_at   | RIKEN cDNA 2810454L23 gene                                            | 2810454L23Rik     | -1.01 | 0.572 | 1.03  | 0.690 | 1.55 | 0.029 | 1.02  | 0.978 | -1.17 | 0.386 |
| 1437486_at   | G protein-coupled receptor, family C, group 5, member A               | Gprc5a            | 2.81  | 0.187 | 4.18  | 0.050 | 1.55 | 0.007 | 1.18  | 0.031 | 1.56  | 0.007 |
| 1455258_at   | potassium voltage gated channel, Shaw-related subfamily, member:      | Kcnc2             | 1.85  | 0.505 | -1.07 | 0.530 | 1.55 | 0.036 | -1.15 | 0.301 | -1.62 | 0.148 |
| 1436404_at   | TLC domain containing 1                                               | Tlcd1             | -1.05 | 0.528 | 1.48  | 0.005 | 1.55 | 0.023 | 1.27  | 0.204 | 1.68  | 0.058 |
| 1450644_at   | zinc finger protein 36, C3H type-like 1                               | Zfp3611           | -1.03 | 0.752 | 1.4   | 0.022 | 1.55 | 0.030 | 1.33  | 0.016 | 1.57  | 0.000 |
| 1429286_at   | RIKEN cDNA 1190003M12 gene                                            | 1190003M12Rik     | 1.18  | 0.844 | 1.45  | 1.000 | 1.56 | 0.050 | 1.21  | 0.328 | 2.22  | 0.464 |
| 1431412_at   | RIKEN cDNA 2810455B08 gene                                            | 2810455B08Rik     | -1.2  | 0.369 | 1.13  | 0.649 | 1.56 | 0.022 | 1.28  | 0.554 | -1.04 | 0.622 |
| 1436219_at   | RIKEN cDNA 4933403F05 gene                                            | 4933403F05Rik     | 1.4   | 0.038 | 2.63  | 0.005 | 1.56 | 0.008 | 1.75  | 0.002 | 1.69  | 0.008 |
| 1438442_at   | expressed sequence AI450236                                           | AI450236          | -1.22 | 0.058 | -1.04 | 0.365 | 1.56 | 0.032 | 1.1   | 0.635 | 1.4   | 0.296 |
| 1452458_s_at | peptidylprolyl isomerase (cyclophilin) like 5                         | Ppil5             | -1.02 | 0.688 | 1.23  | 0.771 | 1.56 | 0.028 | 1.35  | 0.073 | 1.47  | 0.019 |
| 1423176_at   | transducer of ErbB-2.1                                                | Tob1              | 1.01  | 0.995 | 1.32  | 0.013 | 1.56 | 0.016 | 1.22  | 0.039 | 1.63  | 0.000 |
| 1439841_at   | zinc finger, FYVE domain containing 27                                | Zfyve27           | -1.12 | 0.457 | 1.51  | 0.634 | 1.56 | 0.012 | 1.95  | 0.076 | 1.24  | 0.443 |
| 1417216_at   | proviral integration site 2                                           | Pim2              | -1.02 | 0.599 | -1.04 | 0.620 | 1.57 | 0.008 | 1.08  | 0.564 | -1.02 | 0.597 |
| 1459896_at   | pogo transposable element with KRAB domain                            | Pogk              | 1.19  | 0.478 | 1.61  | 0.182 | 1.57 | 0.033 | -1.11 | 0.304 | 1.01  | 0.939 |
| 1450343_at   | vomeroneasal 1 receptor, D1                                           | V1rd1             | 1.12  | 0.533 | 1.56  | 0.195 | 1.57 | 0.024 | -1.84 | 0.041 | 1.36  | 0.714 |
| 1424457_at   | amyloid beta (A4) precursor protein-binding, family B, member 3       | Apbb3             | 1.09  | 0.834 | -1.42 | 0.083 | 1.58 | 0.026 | 1.48  | 0.368 | 1.47  | 0.238 |
| 1454617_at   | arrestin domain containing 3                                          | Arrdc3            | -1.05 | 0.719 | 1.4   | 0.142 | 1.58 | 0.007 | 1.35  | 0.021 | 1.71  | 0.025 |
| 1438635_x_at | RIKEN cDNA B930041F14 gene                                            | B930041F14Rik     | -1.11 | 0.205 | 1.19  | 0.322 | 1.58 | 0.037 | 1.1   | 0.311 | 1.32  | 0.130 |
| 1426636_a_at | baculoviral IAP repeat-containing 4                                   | Birc4             | 1.17  | 0.375 | 1.19  | 0.945 | 1.58 | 0.033 | 1.32  | 0.471 | 1.1   | 0.901 |
| 1444139_at   | DNA-damage-inducible transcript 4-like                                | Ddit4l            | 1.47  | 0.166 | 4.02  | 0.001 | 1.58 | 0.015 | 1.51  | 0.165 | 1.84  | 0.062 |
| 1450241_a_at | ecotropic viral integration site 2a                                   | Evi2a             | 1.95  | 0.080 | 2.71  | 0.015 | 1.58 | 0.010 | 1.72  | 0.000 | 1.79  | 0.077 |
| 1442713_at   | Oxysterol binding protein-like 10                                     | Osbp10            | 2.51  | 0.543 | 2.75  | 0.308 | 1.58 | 0.004 | 1.24  | 0.438 | -1.01 | 0.673 |
| 1441135_at   | Zinc finger protein 672                                               | Zfp672            | 1.15  | 0.853 | -1.15 | 0.517 | 1.58 | 0.040 | -1.68 | 0.103 | 1.35  | 0.263 |
| 1431898_at   | RIKEN cDNA 4930403J07 gene                                            | 4930403J07Rik     | 1.37  | 0.567 | 1.17  | 0.083 | 1.59 | 0.042 | 1.97  | 0.742 | -1.46 | 0.061 |
| 1431453_at   | RIKEN cDNA 4933406K04 gene                                            | 4933406K04Rik     | -1.43 | 0.330 | -1.09 | 0.390 | 1.59 | 0.027 | -1.12 | 0.608 | 1.14  | 0.643 |
| 1429272_a_at | RIKEN cDNA 9130022K13 gene /// RIKEN cDNA 2210421G13 gene             | 9130022K13Rik /// | 1.19  | 0.556 | 1.39  | 0.678 | 1.59 | 0.040 | 2     | 0.281 | 2.33  | 0.134 |
| 1448049_at   | jumonji domain containing 1C                                          | Jmj1d1c           | 1.35  | 0.514 | 1.73  | 0.766 | 1.59 | 0.013 | 1.54  | 0.721 | -1.51 | 0.114 |
| 1438481_at   | PRP4 pre-mRNA processing factor 4 homolog (yeast)                     | Prp4              | 1.3   | 0.058 | 1.42  | 0.002 | 1.59 | 0.023 | 1.09  | 0.362 | 1.3   | 0.187 |
| 1439548_at   | RAP2B, member of RAS oncogene family                                  | Rap2b             | 1.04  | 0.953 | 1.52  | 0.031 | 1.59 | 0.011 | 1.4   | 0.218 | 1.3   | 0.078 |
| 1436786_at   | RIKEN cDNA 1110069O07 gene                                            | 1110069O07Rik     | 1.02  | 0.477 | -1.23 | 0.259 | 1.6  | 0.018 | -1.06 | 0.632 | -1.18 | 0.426 |
| 1439508_at   | RIKEN cDNA A730055L17 gene                                            | A730055L17Rik     | -1.14 | 0.387 | 1.19  | 0.273 | 1.6  | 0.003 | 1.12  | 0.544 | 1.43  | 0.098 |
| 1452792_at   | DAZ interacting protein 1                                             | Dzip1             | 1.16  | 0.692 | 1.41  | 0.121 | 1.6  | 0.024 | 1.09  | 0.231 | 1.44  | 0.041 |
| 1454924_at   | fucosyltransferase 10                                                 | Fut10             | 2     | 0.241 | -1.04 | 0.362 | 1.6  | 0.003 | -1.01 | 0.496 | -1.06 | 0.399 |
| 1447701_x_at | isocitrate dehydrogenase 3 (NAD+) alpha                               | Idh3a             | 1.26  | 0.905 | 1.24  | 0.830 | 1.6  | 0.019 | -1.2  | 0.467 | 1.23  | 0.971 |
| 1425239_at   | SET domain containing 4                                               | Setd4             | -1.48 | 0.190 | -1.05 | 0.556 | 1.6  | 0.031 | 1.29  | 0.206 | 1.36  | 0.051 |
| 1439758_at   | amyotrophic lateral sclerosis 2 (juvenile) chromosome region, candic  | Als2cr12          | 1.26  | 0.022 | 1.3   | 0.138 | 1.61 | 0.003 | 1.36  | 0.065 | 1.25  | 0.310 |
| 1437698_at   | myosin Vb                                                             | Myo5b             | 1.99  | 0.844 | 2.65  | 0.994 | 1.61 | 0.040 | -1.24 | 0.523 | 1.1   | 0.606 |
| 1447578_at   | RIKEN cDNA 1700084J12 gene                                            | 1700084J12Rik     | 1.05  | 0.798 | 1.3   | 0.773 | 1.62 | 0.013 | 1.02  | 0.904 | 1.06  | 0.697 |
| 1431109_at   | RIKEN cDNA 5430406M13 gene                                            | 5430406M13Rik     | -1.01 | 0.341 | -1.93 | 0.064 | 1.62 | 0.003 | -1.5  | 0.289 | 2.28  | 0.967 |
| 1443502_at   | baculoviral IAP repeat-containing 7 (livin)                           | Birc7             | 1.92  | 0.985 | 1.61  | 0.960 | 1.62 | 0.011 | 2.09  | 0.719 | 2.97  | 0.083 |
| 1426620_at   | carbohydrate sulfotransferase 10                                      | Chst10            | -1.02 | 0.711 | -1.2  | 0.279 | 1.62 | 0.025 | 1.02  | 0.996 | -1    | 0.700 |
| 1434715_at   | RIKEN cDNA 1600014C10 gene                                            | 1600014C10Rik     | 1.25  | 0.365 | 1.58  | 0.537 | 1.63 | 0.041 | 1.57  | 0.101 | -1.06 | 0.763 |
| 1455646_at   | RIKEN cDNA 2010004M13 gene                                            | 2010004M13Rik     | -1.05 | 0.495 | 1.3   | 0.336 | 1.63 | 0.024 | 1.06  | 0.809 | 1.48  | 0.272 |
| 1432667_at   | RIKEN cDNA 2210411G17 gene                                            | 2210411G17Rik     | -1.2  | 0.409 | -1.43 | 0.066 | 1.63 | 0.036 | 2.45  | 0.297 | 1.02  | 0.956 |
| 1453609_s_at | coiled-coil domain containing 9                                       | Ccdc9             | 1.17  | 0.581 | 1.75  | 0.848 | 1.63 | 0.007 | 1.19  | 0.097 | 1.15  | 0.327 |
| 1422590_at   | cyclin-dependent kinase 5                                             | Cdk5              | -1.73 | 0.020 | -1.45 | 0.054 | 1.63 | 0.020 | -1.09 | 0.370 | -1.07 | 0.731 |
| 1425882_at   | growth differentiation factor 2                                       | Gdf2              | -1.14 | 0.387 | 1     | 0.668 | 1.63 | 0.049 | -1.29 | 0.172 | 1.05  | 0.826 |
| 1456008_at   | leucine rich repeat containing 8 family, member E                     | Lrrc8e            | -1.03 | 0.574 | 1.14  | 0.985 | 1.63 | 0.017 | -1.05 | 0.675 | 1.23  | 0.369 |
| 1449103_at   | testis expressed gene 101                                             | Tex101            | 1.3   | 0.527 | 1.5   | 0.572 | 1.63 | 0.017 | 1.06  | 0.928 | -1.04 | 0.553 |
| 1434240_at   | RIKEN cDNA 4632434I11 gene                                            | 4632434I11Rik     | 1.32  | 0.450 | 2.03  | 0.140 | 1.64 | 0.019 | 1.45  | 0.051 | 1.48  | 0.005 |
| 1426430_at   | jagged 2                                                              | Jag2              | -1.57 | 0.008 | -1.12 | 0.415 | 1.64 | 0.021 | 1.12  | 0.813 | 1.22  | 0.697 |
| 1457448_at   | patatin-like phospholipase domain containing 1                        | Pnpla1            | 1.18  | 0.983 | 1.91  | 0.439 | 1.64 | 0.041 | -1.1  | 0.365 | 2.04  | 0.698 |
| 1434909_at   | Ras-related GTP binding D                                             | Rragd             | 1.43  | 0.793 | 1.49  | 0.803 | 1.64 | 0.028 | 2.21  | 0.831 | -1.37 | 0.372 |
| 1439659_at   | Trf (TATA binding protein-related factor)-proximal protein homolog (I | Trfp /// Usp49    | -1.07 | 0.596 | 1.19  | 0.737 | 1.64 | 0.000 | -1.08 | 0.544 | 1.15  | 0.529 |
| 1457312_at   | NHL repeat containing 2                                               | Nhlrc2            | 1.74  | 0.991 | 1.26  | 0.926 | 1.65 | 0.020 | 1.71  | 0.318 | 1.2   | 0.816 |
| 1436189_at   | NAD(P)H dehydrogenase, quinone 2                                      | Nqo2              | 1.42  | 0.175 | 1.6   | 0.242 | 1.65 | 0.006 | 1.21  | 0.001 | 1.34  | 0.790 |
| 1419365_at   | peroxisomal biogenesis factor 11a                                     | Pex11a            | 1.51  | 0.183 | 1.96  | 0.228 | 1.65 | 0.015 | -1.06 | 0.676 | 1.69  | 0.083 |
| 1436962_at   | PR domain containing 6                                                | Prdm6             | -1.19 | 0.450 | 1.97  | 0.778 | 1.65 | 0.002 | 1.24  | 0.814 | -1.09 | 0.543 |

|              |                                                                                                     |               |       |       |       |       |      |       |       |       |       |       |
|--------------|-----------------------------------------------------------------------------------------------------|---------------|-------|-------|-------|-------|------|-------|-------|-------|-------|-------|
| 1455894_at   | peptidyl-tRNA hydrolase 2                                                                           | Pthr2         | 1.57  | 0.223 | 2.77  | 0.009 | 1.65 | 0.003 | 1.8   | 0.019 | 1.56  | 0.012 |
| 1449509_at   | small EDRK-rich factor 1                                                                            | Serf1         | 1.09  | 0.433 | 1.31  | 0.189 | 1.65 | 0.012 | 1.35  | 0.047 | 1.09  | 0.681 |
| 1441033_at   | transmembrane and tetratricopeptide repeat containing 2                                             | Tmtc2         | -1.09 | 0.482 | -1.09 | 0.627 | 1.65 | 0.034 | 2.03  | 0.040 | -1.03 | 0.561 |
| 1446542_at   | acyl-CoA synthetase short-chain family member 2                                                     | Acss2         | -1.9  | 0.045 | -1.22 | 0.126 | 1.66 | 0.023 | -1.13 | 0.256 | 1.76  | 0.498 |
| 1435354_at   | potassium inwardly-rectifying channel, subfamily J, member 15                                       | Kcnj15        | 1.16  | 0.327 | 1.77  | 0.028 | 1.66 | 0.032 | 1.22  | 0.284 | 1.16  | 0.976 |
| 1438351_at   | homeo box, msh-like 2                                                                               | Msx2          | -1.62 | 0.071 | -1.4  | 0.147 | 1.66 | 0.028 | 1.39  | 0.022 | 1.11  | 0.687 |
| 1454762_at   | X Kell blood group precursor related X linked                                                       | Xkrx          | -1.62 | 0.176 | 1.05  | 0.752 | 1.66 | 0.028 | 1.91  | 0.598 | 1.29  | 0.811 |
| 1432861_at   | RIKEN cDNA 2900046F13 gene                                                                          | 2900046F13Rik | -1.33 | 0.047 | -1.09 | 0.519 | 1.67 | 0.038 | 1.74  | 0.362 | -1.15 | 0.365 |
| 1444564_at   | apolipoprotein D                                                                                    | Apod          | 1.18  | 0.689 | -2.06 | 0.052 | 1.67 | 0.021 | -1.31 | 0.332 | -1.6  | 0.177 |
| 1450297_at   | interleukin 6                                                                                       | Il6           | 1.27  | 0.420 | 1.65  | 0.085 | 1.67 | 0.033 | 1.1   | 0.603 | 1.85  | 0.061 |
| 1425967_a_at | mast cell protease 4                                                                                | Mcpt4         | 1.12  | 0.645 | 1.66  | 0.486 | 1.67 | 0.032 | 2.52  | 0.391 | -1.26 | 0.256 |
| 1457887_at   | SCO-spondin                                                                                         | Sspo          | -1.1  | 0.439 | 1.11  | 0.605 | 1.67 | 0.003 | 1.08  | 0.797 | 1.26  | 0.291 |
| 1424680_at   | expressed sequence BB146404                                                                         | BB146404      | 3.41  | 0.132 | 4.51  | 0.024 | 1.68 | 0.010 | 1.18  | 0.191 | 1.16  | 0.042 |
| 1444878_at   | Dedicator of cytokinesis 10                                                                         | Dock10        | 1.09  | 0.451 | 1.27  | 0.496 | 1.68 | 0.020 | 1.82  | 0.391 | 2.09  | 0.343 |
| 1440125_at   | RIKEN cDNA A530054K11 gene                                                                          | A530054K11Rik | 1.55  | 0.065 | 1.98  | 0.030 | 1.69 | 0.029 | -1.05 | 0.864 | 1.21  | 0.411 |
| 1433619_at   | expressed sequence AI894139                                                                         | AI894139      | -1.21 | 0.142 | 1.38  | 0.148 | 1.69 | 0.002 | 1.25  | 0.293 | 1.66  | 0.023 |
| 1437420_at   | bromodomain adjacent to zinc finger domain, 1B                                                      | Baz1b         | -1.01 | 0.947 | 1.71  | 0.401 | 1.69 | 0.018 | -1.49 | 0.146 | -1.07 | 0.449 |
| 1439617_s_at | phosphoenolpyruvate carboxykinase 1, cytosolic                                                      | Pck1          | -1.18 | 0.416 | -1.1  | 0.546 | 1.69 | 0.027 | 1.01  | 0.785 | 1.81  | 0.588 |
| 1444123_at   | PR domain containing 2, with ZNF domain                                                             | Prdm2         | -1.6  | 0.135 | -1.68 | 0.170 | 1.69 | 0.017 | 1.31  | 0.106 | 1.18  | 0.577 |
| 1440886_at   | cell division cycle 37 homolog (S. cerevisiae)-like 1                                               | Cdc37l1       | 1.07  | 0.879 | 1.44  | 0.141 | 1.7  | 0.043 | 1.58  | 0.024 | 1.52  | 0.007 |
| 1422134_at   | FBJ osteosarcoma oncogene B                                                                         | Fosb          | 1.07  | 0.832 | 1.62  | 0.107 | 1.7  | 0.008 | -1.09 | 0.250 | 1.46  | 0.118 |
| 1421668_x_at | spermatogenesis associated glutamate (E)-rich protein 3                                             | Speer3        | 1.65  | 0.753 | 1.05  | 0.290 | 1.7  | 0.020 | 1.07  | 0.931 | 1.85  | 0.269 |
| 1444507_at   | ubiquitin specific peptidase 53                                                                     | Usp53         | 1.1   | 0.533 | -1.41 | 0.336 | 1.7  | 0.022 | -1.02 | 0.591 | 1.43  | 0.475 |
| 1439503_at   | zinc finger protein 28                                                                              | Zfp28         | 1.13  | 0.629 | 1.66  | 0.006 | 1.7  | 0.006 | 1.16  | 0.111 | -1.03 | 0.707 |
| 1459953_at   | Expressed sequence AW011752                                                                         | AW011752      | 1.04  | 0.907 | 2.01  | 0.130 | 1.71 | 0.026 | 1.02  | 0.824 | 1.3   | 0.199 |
| 1418665_at   | inositol (myo)-1(or 4)-monophosphatase 2                                                            | Impa2         | -1.11 | 0.465 | -1.47 | 0.266 | 1.71 | 0.011 | 1.1   | 0.753 | 2.47  | 0.193 |
| 1447361_at   | Metaxin 1                                                                                           | Mtx1          | -1.21 | 0.271 | 1.33  | 0.689 | 1.71 | 0.003 | -1.04 | 0.812 | 1.35  | 0.047 |
| 1437012_x_at | Rap guanine nucleotide exchange factor (GEF) 3                                                      | Rapgef3       | -1.38 | 0.049 | -1.35 | 0.115 | 1.71 | 0.045 | 1.64  | 0.177 | 1.67  | 0.304 |
| 1429069_at   | STIP1 homology and U-Box containing protein 1                                                       | Stub1         | -1.28 | 0.061 | -1.07 | 0.603 | 1.71 | 0.015 | 1.24  | 0.084 | 1.08  | 0.785 |
| 1450496_a_at | RIKEN cDNA 2810433K01 gene                                                                          | 2810433K01Rik | 1.57  | 0.917 | 2.09  | 0.562 | 1.72 | 0.040 | 1.21  | 0.669 | 1.19  | 0.373 |
| 1430566_at   | RIKEN cDNA 4733401A01 gene                                                                          | 4733401A01Rik | 1.72  | 0.355 | 2.09  | 0.140 | 1.72 | 0.019 | 1.65  | 0.106 | -1.08 | 0.361 |
| 1456296_at   | RIKEN cDNA 5830418K08 gene                                                                          | 5830418K08Rik | 1.03  | 0.718 | 1.21  | 0.753 | 1.72 | 0.041 | 1.96  | 0.023 | -1.47 | 0.169 |
| 1456894_at   | RIKEN cDNA C130039O16 gene                                                                          | C130039O16Rik | -1.18 | 0.227 | 1.89  | 0.521 | 1.72 | 0.018 | 1.51  | 0.660 | 1.51  | 0.632 |
| 1424229_at   | dual-specificity tyrosine-(Y)-phosphorylation regulated kinase 3                                    | Dyrk3         | 2.16  | 0.096 | 3.82  | 0.004 | 1.72 | 0.023 | 1.43  | 0.038 | 1.89  | 0.003 |
| 1457229_at   | G-protein coupled receptor 173                                                                      | Gpr173        | 1.87  | 0.410 | 1.65  | 0.420 | 1.72 | 0.018 | -1.05 | 0.692 | 1.34  | 0.964 |
| 1434759_at   | leucine rich repeat transmembrane neuronal 3                                                        | Lrrtm3        | 2.21  | 0.704 | 1.87  | 0.925 | 1.72 | 0.004 | 1.04  | 0.452 | 2.01  | 0.738 |
| 1449449_at   | prostaglandin E synthase                                                                            | Ptges         | 1.04  | 0.968 | 1.5   | 0.287 | 1.72 | 0.003 | 1.34  | 0.206 | 1.95  | 0.384 |
| 1431992_at   | RIKEN cDNA 4930568K20 gene                                                                          | 4930568K20Rik | 1.65  | 0.342 | 1.09  | 0.870 | 1.73 | 0.029 | -1.68 | 0.067 | 1.17  | 0.310 |
| 1441172_at   | AF4/FMR2 family, member 3                                                                           | Af3           | -1.12 | 0.418 | -1.25 | 0.336 | 1.73 | 0.000 | 1.35  | 0.036 | 1.32  | 0.712 |
| 1453410_at   | angiotensin-like 4                                                                                  | Angptl4       | 2.83  | 0.152 | 1.91  | 0.306 | 1.73 | 0.022 | 1.81  | 0.115 | 1.53  | 0.969 |
| 1419083_at   | tumor necrosis factor (ligand) superfamily, member 11                                               | Tnfsf11       | 2.87  | 0.270 | 1.67  | 0.427 | 1.73 | 0.016 | 1.68  | 0.187 | 1.6   | 0.030 |
| 1437127_at   | RIKEN cDNA A630033E08 gene                                                                          | A630033E08Rik | -1.25 | 0.390 | -1.56 | 0.095 | 1.74 | 0.001 | 1.41  | 0.001 | 1.1   | 0.529 |
| 1444503_at   | Glioblastoma amplified sequence                                                                     | Gbas          | -1.22 | 0.317 | -1.31 | 0.340 | 1.74 | 0.013 | -1.02 | 0.934 | -1.11 | 0.309 |
| 1445003_at   | phenylalanine-tRNA synthetase-like, alpha subunit                                                   | Farsla        | 1.67  | 0.535 | 2.82  | 0.159 | 1.75 | 0.015 | 1.03  | 0.818 | 1.2   | 0.837 |
| 1435560_at   | integrin alpha L /// similar to Integrin alpha-L precursor (Leukocyte antigen ITGAL /// LOC6711163) | Itgal         | 1.3   | 0.403 | 2.11  | 0.843 | 1.75 | 0.016 | -1.22 | 0.302 | -1.02 | 0.771 |
| 1458668_at   | Tumor protein D52                                                                                   | Tpd52         | 1.63  | 0.967 | -1.13 | 0.640 | 1.75 | 0.015 | 1.31  | 0.647 | 1.55  | 0.632 |
| 1431376_at   | WD repeat domain 62                                                                                 | Wdr62         | 1.07  | 0.934 | 1.01  | 0.847 | 1.75 | 0.012 | 1.32  | 0.087 | -1.52 | 0.270 |
| 1432797_at   | RIKEN cDNA 2900060N12 gene                                                                          | 2900060N12Rik | 1.61  | 0.142 | -1.33 | 0.109 | 1.76 | 0.030 | -1.51 | 0.008 | 1.41  | 0.808 |
| 1436661_at   | dipeptidylpeptidase 10                                                                              | Dpp10         | 1.25  | 0.495 | 1.06  | 0.454 | 1.76 | 0.032 | 2.56  | 0.271 | -1.45 | 0.222 |
| 1457708_at   | methyl-CpG binding domain protein 4                                                                 | Mbd4          | -1.11 | 0.547 | 1.21  | 0.367 | 1.76 | 0.034 | 1.12  | 0.815 | -1.1  | 0.546 |
| 1437074_at   | sorting nexin 5                                                                                     | Snx5          | 2.73  | 0.269 | 4.24  | 0.070 | 1.76 | 0.024 | 1.64  | 0.032 | 1.4   | 0.081 |
| 1432422_at   | RIKEN cDNA 1700063K16 gene                                                                          | 1700063K16Rik | -1.21 | 0.441 | 1.18  | 0.728 | 1.77 | 0.006 | 2.38  | 0.219 | 1.42  | 0.652 |
| 1443934_at   | RIKEN cDNA 9230110C19 gene                                                                          | 9230110C19Rik | 1.22  | 0.174 | 1.5   | 0.065 | 1.77 | 0.014 | 1.22  | 0.288 | 1.45  | 0.065 |
| 1425653_at   | activating transcription factor 7                                                                   | Atf7          | 1.83  | 0.720 | -1.21 | 0.231 | 1.78 | 0.046 | 1     | 0.645 | 1.97  | 0.907 |
| 1434631_at   | DNA segment, Chr 3, ERATO Doi 751, expressed                                                        | D3Ertd751e    | 1.67  | 0.485 | -1.43 | 0.215 | 1.78 | 0.009 | 1.16  | 0.739 | 1.13  | 0.939 |
| 1443672_at   | leucyl-tRNA synthetase, mitochondrial                                                               | Lars2         | -1.07 | 0.603 | -1.19 | 0.306 | 1.78 | 0.040 | -1.15 | 0.364 | 1.86  | 0.825 |
| 1452855_at   | lymphocyte antigen 6 complex, locus K                                                               | Ly6k          | 1.48  | 0.366 | 1.33  | 0.795 | 1.78 | 0.039 | 1.11  | 0.837 | -1.2  | 0.095 |
| 1444971_at   | RNA binding motif protein 5                                                                         | Rbm5          | 1.43  | 0.170 | 1.24  | 0.438 | 1.78 | 0.013 | 1.24  | 0.369 | 1.2   | 0.284 |

|              |                                                                     |                   |       |       |       |       |      |       |       |       |       |       |
|--------------|---------------------------------------------------------------------|-------------------|-------|-------|-------|-------|------|-------|-------|-------|-------|-------|
| 1449370_at   | SRY-box containing gene 4 /// similar to Transcription factor SOX-4 | Sox4 /// LOC67227 | 1.04  | 0.137 | 1.63  | 0.065 | 1.78 | 0.033 | 1.5   | 0.022 | 1.78  | 0.018 |
| 1459828_at   | Serine/arginine repetitive matrix 1                                 | Srrm1             | 1.45  | 0.995 | 1.66  | 0.409 | 1.78 | 0.015 | -1.64 | 0.022 | -1.16 | 0.326 |
| 1458962_at   | transmembrane emp24 protein transport domain containing 5           | Tmed5             | -1.2  | 0.070 | 1.5   | 0.318 | 1.78 | 0.047 | 1.03  | 0.744 | 1.01  | 0.971 |
| 1416869_x_at | Lck interacting transmembrane adaptor 1                             | Lime1             | 2.17  | 0.268 | 2.22  | 0.281 | 1.79 | 0.023 | 3.1   | 0.189 | 1.22  | 0.987 |
| 1422890_at   | protocadherin 18                                                    | Podh18            | -1.07 | 0.833 | 1.41  | 0.138 | 1.79 | 0.039 | 1.3   | 0.036 | 1.3   | 0.124 |
| 1460069_at   | structural maintenance of chromosomes 6                             | Smc6              | -1.12 | 0.399 | -1.49 | 0.341 | 1.79 | 0.031 | -1.12 | 0.435 | 1.16  | 0.637 |
| 1416926_at   | transformation related protein 53 inducible nuclear protein 1       | Trp53inp1         | 1.12  | 0.621 | 2.52  | 0.002 | 1.79 | 0.000 | 1.45  | 0.047 | 1.69  | 0.003 |
| 1458163_at   | cDNA sequence BC066028                                              | BC066028          | 1.74  | 0.642 | 2.03  | 0.027 | 1.8  | 0.031 | 1.37  | 0.126 | 1.19  | 0.446 |
| 1421600_a_at | tripartite motif protein 26                                         | Trim26            | 1.15  | 0.274 | 1.53  | 0.085 | 1.8  | 0.027 | 1.14  | 0.122 | 1.09  | 0.487 |
| 1443354_at   | Tripartite motif-containing 59                                      | Trim59            | 1.04  | 0.793 | -1.38 | 0.027 | 1.8  | 0.041 | -1.18 | 0.332 | 1.07  | 0.556 |
| 1445406_at   | expressed sequence C77494                                           | C77494            | 1.38  | 0.909 | 1.59  | 0.662 | 1.81 | 0.018 | 3.24  | 0.732 | -1.58 | 0.066 |
| 1436617_at   | centrin 4                                                           | Cetn4             | 1.08  | 0.945 | 1.19  | 0.720 | 1.81 | 0.029 | -1.02 | 0.809 | -1.15 | 0.329 |
| 1456599_at   | nuclear transport factor 2-like export factor 2                     | Nxt2              | 1.18  | 0.300 | 1.2   | 0.568 | 1.81 | 0.010 | 1.17  | 0.103 | -1.01 | 0.927 |
| 1448096_at   | 2-oxoglutarate and iron-dependent oxygenase domain containing 1     | Ogfod1            | 1.2   | 0.455 | 1.15  | 0.799 | 1.81 | 0.049 | 1.49  | 0.358 | 1.04  | 0.806 |
| 1457072_at   | RIKEN cDNA 2410127E16 gene /// B-cell CLL/lymphoma 11A (zinc        | 2410127E16Rik /// | 1.33  | 0.593 | 1.02  | 0.383 | 1.82 | 0.012 | -1.28 | 0.219 | 1.73  | 0.374 |
| 1432728_at   | RIKEN cDNA 5830433D23 gene                                          | 5830433D23Rik     | -2.61 | 0.112 | -2.59 | 0.108 | 1.82 | 0.038 | -1    | 0.974 | 2.39  | 0.323 |
| 1430100_at   | mitochondrial ribosomal protein S15                                 | Mrps15            | 1.55  | 0.639 | 1.82  | 0.288 | 1.82 | 0.048 | 1.6   | 0.552 | -1.1  | 0.643 |
| 1460683_at   | TEA domain family member 4                                          | Tead4             | -1.14 | 0.735 | 1.41  | 0.380 | 1.82 | 0.016 | 1.05  | 0.488 | 1.58  | 0.613 |
| 1457623_x_at | transformation related protein 53                                   | Trp53             | -1.06 | 0.547 | 1.21  | 0.769 | 1.82 | 0.014 | 1.12  | 0.134 | 1.15  | 0.066 |
| 1430544_at   | RIKEN cDNA 5830404H04 gene                                          | 5830404H04Rik     | 1.46  | 0.961 | 1.51  | 0.590 | 1.83 | 0.019 | 1.17  | 0.882 | 1.12  | 0.640 |
| 1440206_at   | RIKEN cDNA A930024E05 gene                                          | A930024E05Rik     | 2.06  | 0.355 | 1.22  | 0.304 | 1.83 | 0.020 | 1.37  | 0.975 | 2.24  | 0.388 |
| 1456356_at   | RIKEN cDNA B230217O12 gene                                          | B230217O12Rik     | 1.69  | 0.785 | 1.61  | 0.796 | 1.83 | 0.026 | 1.09  | 0.295 | -1.12 | 0.340 |
| 1419120_at   | lymphoblastomic leukemia                                            | Lyl1              | 1.5   | 0.444 | 1.81  | 0.467 | 1.83 | 0.032 | 1.87  | 0.724 | 1.66  | 0.981 |
| 1451785_at   | retinitis pigmentosa GTPase regulator interacting protein 1         | Rpgrip1           | 1.65  | 0.937 | -1.8  | 0.169 | 1.83 | 0.027 | 2.05  | 0.109 | 1.26  | 0.274 |
| 1433007_at   | RIKEN cDNA 5430430B14 gene                                          | 5430430B14Rik     | 1.62  | 0.620 | 1.6   | 0.942 | 1.84 | 0.041 | 1.86  | 0.413 | 1.47  | 0.824 |
| 1439081_at   | meningioma expressed antigen 5 (hyaluronidase)                      | Mgea5             | 2.08  | 0.472 | 2.02  | 0.388 | 1.85 | 0.005 | 1.11  | 0.850 | 1.08  | 0.337 |
| 1441963_at   | ProSAP1P1 protein                                                   | Prosap1p1         | 2.13  | 0.604 | 3.17  | 0.009 | 1.85 | 0.003 | 1.43  | 0.135 | 1.5   | 0.167 |
| 1432376_at   | RIKEN cDNA 3830403N18 gene                                          | 3830403N18Rik     | 2.58  | 0.314 | 2.22  | 0.675 | 1.86 | 0.001 | -1.88 | 0.084 | -1.48 | 0.156 |
| 1453685_at   | nudix (nucleoside diphosphate linked moiety X)-type motif 7         | Nudt7             | -1.45 | 0.152 | 1.28  | 0.637 | 1.87 | 0.017 | 2.19  | 0.228 | 1.11  | 0.974 |
| 1455098_a_at | vitronectin                                                         | Vtn               | 2.01  | 0.706 | 1.91  | 0.018 | 1.87 | 0.029 | 1.11  | 0.670 | 1.24  | 0.976 |
| 1442528_at   | exportin 4                                                          | Xpo4              | -1.13 | 0.638 | -1.17 | 0.065 | 1.87 | 0.026 | 1     | 0.792 | -1.12 | 0.421 |
| 1436288_at   | RIKEN cDNA 1700049M11 gene                                          | 1700049M11Rik     | -1.21 | 0.408 | 1.21  | 0.317 | 1.88 | 0.013 | 1.09  | 0.971 | -1.08 | 0.580 |
| 1432639_at   | RIKEN cDNA 4633401L03 gene                                          | 4633401L03Rik     | 1.39  | 0.766 | 1.84  | 0.725 | 1.88 | 0.046 | -1.24 | 0.347 | 2.13  | 0.026 |
| 1424989_at   | transmembrane protein 142A                                          | Tmem142a          | 1.07  | 0.572 | 1.05  | 0.571 | 1.89 | 0.001 | -1.06 | 0.627 | 1.16  | 0.123 |
| 1439926_at   | RIKEN cDNA 4632417D23 gene                                          | 4632417D23Rik     | 1.22  | 0.598 | -1.35 | 0.239 | 1.9  | 0.042 | 1.32  | 0.569 | 1.58  | 0.452 |
| 1447076_at   | NEL-like 1 (chicken)                                                | Nell1             | 1.12  | 0.283 | 1.36  | 0.780 | 1.9  | 0.030 | -1.11 | 0.290 | 2.71  | 0.426 |
| 1426663_s_at | solute carrier family 45, member 3                                  | Slc45a3           | 2.82  | 0.391 | 2.66  | 0.278 | 1.9  | 0.026 | 1.46  | 0.161 | 1.58  | 0.404 |
| 1457570_at   | RIKEN cDNA A230001M10 gene                                          | A230001M10Rik     | -1.14 | 0.299 | -1.3  | 0.050 | 1.91 | 0.042 | 1.82  | 0.205 | -1.3  | 0.458 |
| 1453003_at   | sortilin-related receptor, LDLR class A repeats-containing          | Sorl1             | 1.38  | 0.848 | 1.21  | 0.812 | 1.91 | 0.011 | -1.58 | 0.115 | 3.51  | 0.198 |
| 1425080_at   | zinc finger protein 286                                             | Zfp286            | -1.14 | 0.402 | -1.21 | 0.333 | 1.91 | 0.021 | -1.32 | 0.237 | 1.54  | 0.190 |
| 1453417_at   | RIKEN cDNA 4933407K13 gene                                          | 4933407K13Rik     | -1.52 | 0.026 | -1.15 | 0.089 | 1.92 | 0.004 | 1.41  | 0.376 | 1.46  | 0.633 |
| 1421028_a_at | myocyte enhancer factor 2C                                          | Mef2c             | 1.08  | 0.929 | -1.23 | 0.288 | 1.92 | 0.033 | 2.18  | 0.550 | 2.01  | 0.545 |
| 1452015_at   | RIKEN cDNA 6330416G13 gene                                          | 6330416G13Rik     | 1.16  | 0.885 | 1.09  | 0.888 | 1.93 | 0.024 | 1.01  | 0.986 | 1.02  | 0.366 |
| 1451528_at   | cDNA sequence BC025833                                              | BC025833          | 1.65  | 0.719 | -1    | 0.401 | 1.93 | 0.018 | 1.11  | 0.958 | -1.18 | 0.289 |
| 1457105_at   | polycystic kidney disease 2-like 1                                  | Pkd2l1            | 1.71  | 0.640 | 1.2   | 0.723 | 1.93 | 0.049 | 1.43  | 0.695 | 2.11  | 0.345 |
| 1451472_at   | RIKEN cDNA 3230401I01 gene                                          | 3230401I01Rik     | -1.53 | 0.265 | -1.02 | 0.466 | 1.94 | 0.023 | 1.25  | 0.809 | 1.72  | 0.453 |
| 1441178_at   | DTW domain containing 2                                             | Dtw2d             | 1.03  | 0.988 | 1     | 0.962 | 1.94 | 0.022 | -1.06 | 0.654 | 1.3   | 0.498 |
| 1456075_at   | protein kinase D2                                                   | Prkd2             | 1.61  | 0.194 | -1.25 | 0.361 | 1.94 | 0.011 | 1.65  | 0.611 | -1.53 | 0.254 |
| 1453360_a_at | testis expressed gene 9                                             | Tex9              | 1.28  | 0.356 | 1.08  | 0.283 | 1.94 | 0.010 | 1.04  | 0.981 | 1.13  | 0.583 |
| 1434735_at   | hepatic leukemia factor                                             | Hlf               | 2.15  | 0.992 | 1.74  | 0.609 | 1.95 | 0.034 | 1.17  | 0.587 | 1.2   | 0.852 |
| 1441035_at   | potassium voltage-gated channel, Isk-related subfamily, member 1    | Kcne1             | -1.06 | 0.440 | -1.01 | 0.480 | 1.95 | 0.048 | 1.07  | 0.424 | -1.08 | 0.502 |
| 1424623_at   | serine (or cysteine) peptidase inhibitor, clade B, member 5         | Serp1b5           | 1.41  | 0.965 | 1.44  | 0.477 | 1.95 | 0.020 | -1.1  | 0.460 | -1.13 | 0.139 |
| 1441476_at   | suppressor of cytokine signaling 2                                  | Socs2             | 1.25  | 0.107 | -1.22 | 0.346 | 1.95 | 0.007 | -2.48 | 0.037 | -1.08 | 0.661 |
| 1425191_at   | RIKEN cDNA 9430098E02 gene                                          | 9430098E02Rik     | 1.53  | 0.402 | 2.28  | 0.354 | 1.96 | 0.031 | -1.12 | 0.468 | 1.61  | 0.058 |
| 1447866_x_at | RIKEN cDNA 2300009A05 gene                                          | 2300009A05Rik     | 2.35  | 0.862 | 1.58  | 0.885 | 1.97 | 0.002 | 1.87  | 0.243 | 1.63  | 0.944 |
| 1447689_at   | G protein-coupled receptor associated sorting protein 1             | Gprasp1           | 1.24  | 0.857 | 1.93  | 0.494 | 1.97 | 0.001 | 1.38  | 0.444 | 1.8   | 0.777 |
| 1429071_at   | malic enzyme 3, NADP(+)-dependent, mitochondrial                    | Me3               | -1.01 | 0.672 | -1.27 | 0.426 | 1.97 | 0.028 | 1.28  | 0.547 | 1.26  | 0.922 |
| 1429929_at   | meiosis defective 1                                                 | Mei1              | -1.09 | 0.288 | -1.52 | 0.181 | 1.97 | 0.008 | 2.17  | 0.002 | -1.36 | 0.255 |



|              |                                                                     |               |       |       |       |       |      |       |       |       |       |       |
|--------------|---------------------------------------------------------------------|---------------|-------|-------|-------|-------|------|-------|-------|-------|-------|-------|
| 1435968_at   | Protein tyrosine phosphatase, receptor type, N polypeptide 2        | Ptprn2        | 1.79  | 0.183 | 1.56  | 0.397 | 1.97 | 0.031 | 1.58  | 0.661 | 1.53  | 0.913 |
| 1449561_at   | RIKEN cDNA 492150405 gene                                           | 492150405Rik  | 2.27  | 0.123 | 2.13  | 0.112 | 1.98 | 0.047 | 1.87  | 0.122 | 1.32  | 0.382 |
| 1427684_at   | zinc finger protein 264                                             | Zfp264        | 1.42  | 0.923 | 1.01  | 0.916 | 1.99 | 0.027 | -1.98 | 0.104 | 1.23  | 0.561 |
| 1417337_at   | erythrocyte protein band 4.2                                        | Epb4.2        | 1.26  | 0.808 | 1.55  | 0.747 | 2    | 0.049 | 1.49  | 0.566 | 1.06  | 0.809 |
| 1457812_at   | transformation related protein 53 binding protein 1                 | Trp53bp1      | 1.17  | 0.889 | -1.09 | 0.434 | 2    | 0.014 | -1.1  | 0.459 | -1.45 | 0.301 |
| 1449457_at   | acyl-CoA thioesterase 12                                            | Acot12        | 1.11  | 0.980 | -1.21 | 0.592 | 2.01 | 0.039 | -1.18 | 0.342 | 1.37  | 0.753 |
| 1457038_at   | Fras1 related extracellular matrix protein 2                        | Frem2         | 1.57  | 0.740 | 1.42  | 0.465 | 2.01 | 0.042 | 2.38  | 0.084 | 1.41  | 0.248 |
| 1442214_at   | Nuclear factor I/B                                                  | Nfib          | -1.31 | 0.269 | -1.87 | 0.004 | 2.01 | 0.033 | -1.04 | 0.521 | 1.01  | 0.529 |
| 1434345_at   | transmembrane protein 12                                            | Tmem12        | 1.27  | 0.628 | -1.26 | 0.395 | 2.01 | 0.016 | -1.88 | 0.055 | 2.51  | 0.655 |
| 1455241_at   | cDNA sequence BC037703                                              | BC037703      | 2.34  | 0.138 | 5.04  | 0.010 | 2.02 | 0.020 | 2.05  | 0.205 | 1.73  | 0.163 |
| 1429167_at   | coiled-coil domain containing 112                                   | Ccdc112       | -1.07 | 0.483 | -1.05 | 0.562 | 2.02 | 0.042 | -1.09 | 0.786 | 1.38  | 0.439 |
| 1431599_at   | RIKEN cDNA 2310069B03 gene                                          | 2310069B03Rik | 1.89  | 0.675 | 1.6   | 0.901 | 2.03 | 0.006 | 1.16  | 0.453 | -1.57 | 0.178 |
| 1418944_at   | cysteinyl leukotriene receptor 1                                    | Cysltr1       | -1.59 | 0.055 | -1.46 | 0.035 | 2.03 | 0.023 | 1.19  | 0.859 | 1.8   | 0.335 |
| 1451515_s_at | glycine-N-acyltransferase                                           | Glyat         | 2.28  | 0.159 | 2.1   | 0.300 | 2.03 | 0.038 | -1.19 | 0.189 | -1.06 | 0.512 |
| 1443709_at   | Yippee-like 2 (Drosophila)                                          | Ypel2         | -1.58 | 0.126 | 1.55  | 0.538 | 2.03 | 0.024 | 3.46  | 0.080 | -1.15 | 0.385 |
| 1437137_at   | RIKEN cDNA 6430550H21 gene                                          | 6430550H21Rik | 2.75  | 0.457 | -1.02 | 0.979 | 2.04 | 0.048 | 1.24  | 0.698 | 2.34  | 0.099 |
| 1449971_a_at | CD209f antigen                                                      | Cd209f        | -2.15 | 0.217 | 1.13  | 0.460 | 2.04 | 0.042 | 1.98  | 0.035 | -1.36 | 0.231 |
| 1458158_at   | WD repeat domain 67                                                 | Wdr67         | -1.7  | 0.029 | 1.3   | 0.415 | 2.04 | 0.006 | -1.02 | 0.650 | 1.79  | 0.504 |
| 1440390_at   | cDNA sequence BC025575                                              | BC025575      | -1.28 | 0.071 | 1.63  | 0.785 | 2.05 | 0.032 | -1.04 | 0.734 | 1.65  | 0.051 |
| 1434414_at   | FAD-dependent oxidoreductase domain containing 2                    | Foxred2       | 2.24  | 0.461 | 3.46  | 0.245 | 2.06 | 0.007 | 1.99  | 0.125 | 2.85  | 0.052 |
| 1442561_at   | MAM domain containing 1                                             | Mamdc1        | 1.46  | 0.836 | 1.08  | 0.544 | 2.06 | 0.001 | -2.06 | 0.073 | 1.18  | 0.529 |
| 1416839_at   | methylmalonyl-Coenzyme A mutase                                     | Mut           | 2.03  | 0.904 | 1.65  | 0.760 | 2.06 | 0.033 | -1.1  | 0.907 | 1.42  | 0.775 |
| 1455034_at   | Nuclear receptor subfamily 4, group A, member 2                     | Nr4a2         | 1.28  | 0.905 | 2.01  | 0.042 | 2.06 | 0.003 | 1.63  | 0.002 | 2.37  | 0.002 |
| 1422723_at   | stimulated by retinoic acid gene 6                                  | Stra6         | 1.95  | 0.689 | 1.56  | 0.423 | 2.06 | 0.028 | 1.14  | 0.679 | 1.12  | 0.785 |
| 1435615_at   | zinc finger protein 365                                             | Zfp365        | 1.21  | 0.024 | 1.41  | 0.429 | 2.06 | 0.049 | 1.03  | 0.924 | 1.04  | 0.557 |
| 1458268_s_at | insulin-like growth factor binding protein 3                        | Igf3bp3       | 1.13  | 0.864 | 1.03  | 0.482 | 2.07 | 0.012 | 2.8   | 0.390 | 1.26  | 0.238 |
| 1423523_at   | aminoadipate-semialdehyde synthase                                  | Aass          | -1.25 | 0.147 | 1.23  | 0.533 | 2.08 | 0.034 | 1.33  | 0.952 | 2     | 0.242 |
| 1440333_at   | MAM domain containing 4                                             | Mamdc4        | 2.14  | 0.157 | 2     | 0.153 | 2.08 | 0.009 | 2.4   | 0.578 | 1.4   | 0.271 |
| 1432362_at   | centromere protein P                                                | Cenpp         | 1.28  | 0.442 | 1.47  | 0.484 | 2.09 | 0.049 | 1.19  | 0.479 | -1.11 | 0.519 |
| 1425077_at   | Dnaj (Hsp40) homolog, subfamily C, member 18                        | Dnajc18       | 1.82  | 0.711 | 1.5   | 0.731 | 2.09 | 0.047 | -1.06 | 0.500 | -1.08 | 0.669 |
| 1445404_at   | kinesin family member 27                                            | Kif27         | 1.73  | 0.530 | 3.32  | 0.167 | 2.1  | 0.028 | 2.47  | 0.598 | 1.78  | 0.867 |
| 1431805_a_at | rhopilin, Rho GTPase binding protein 2                              | Rhp2          | 1.5   | 0.732 | -1.42 | 0.195 | 2.1  | 0.003 | -1.7  | 0.066 | 1.26  | 0.945 |
| 1433426_at   | RIKEN cDNA 1700111A04 gene                                          | 1700111A04Rik | 1.38  | 0.559 | -1.03 | 0.499 | 2.11 | 0.040 | -1.14 | 0.402 | 2.37  | 0.371 |
| 1459606_at   | expressed sequence C79130                                           | C79130        | 1.42  | 0.216 | 1.34  | 0.952 | 2.11 | 0.048 | 2.67  | 0.842 | 1.08  | 0.675 |
| 1458174_at   | coiled-coil domain containing 52                                    | Ccdc52        | 2.78  | 0.191 | 2.53  | 0.234 | 2.11 | 0.021 | 2.11  | 0.962 | 1.49  | 0.046 |
| 1426224_x_at | CKLF-like MARVEL transmembrane domain containing 2A                 | Cmtm2a        | -1.25 | 0.291 | 1.24  | 0.855 | 2.11 | 0.035 | 1.76  | 0.977 | 1.25  | 0.968 |
| 1446864_at   | S100P binding protein                                               | S100ppb       | 1.54  | 0.739 | 1.38  | 0.625 | 2.11 | 0.024 | 1.73  | 0.568 | 1.96  | 0.039 |
| 1419186_a_at | ST8 alpha-N-acetylneuraminidase alpha-2,8-sialyltransferase 4       | St8sia4       | 1.92  | 0.427 | 1.8   | 0.974 | 2.11 | 0.002 | -1.11 | 0.657 | -1.15 | 0.309 |
| 1417906_at   | RIKEN cDNA 1700001F09 gene                                          | 1700001F09Rik | 1.2   | 0.871 | -1.11 | 0.407 | 2.12 | 0.017 | 1.19  | 0.562 | 1.27  | 0.903 |
| 1445713_at   | RIKEN cDNA 9630041G16 gene                                          | 9630041G16Rik | 1.85  | 0.161 | 1.58  | 0.608 | 2.12 | 0.037 | 1.25  | 0.366 | -1.32 | 0.232 |
| 1426183_a_at | CD209d antigen                                                      | Cd209d        | 1.71  | 0.627 | 1.31  | 0.971 | 2.12 | 0.016 | -1.3  | 0.261 | 2.37  | 0.337 |
| 1425298_a_at | baculoviral IAP repeat-containing 1a                                | Birc1a        | 1.02  | 0.939 | -2.06 | 0.081 | 2.13 | 0.025 | 1.79  | 0.017 | 1.32  | 0.458 |
| 1424958_at   | carbonic anhydrase 8                                                | Car8          | -1.05 | 0.875 | -1.06 | 0.575 | 2.13 | 0.031 | -1.13 | 0.384 | 2.4   | 0.264 |
| 1421696_at   | polycystic kidney and hepatic disease 1-like 1                      | Pkhd11        | 1.46  | 0.533 | -1.86 | 0.074 | 2.13 | 0.013 | 2.67  | 0.150 | 1.51  | 0.025 |
| 1423003_at   | SET domain containing (lysine methyltransferase) 7                  | Set7          | 2.24  | 0.433 | 1.39  | 0.405 | 2.13 | 0.039 | 1.28  | 0.677 | -1.39 | 0.272 |
| 1445777_at   | UPF2 regulator of nonsense transcripts homolog (yeast)              | Upf2          | 2.86  | 0.465 | 2.69  | 0.201 | 2.13 | 0.044 | -1.37 | 0.241 | -1.48 | 0.019 |
| 1435856_x_at | SWI/SNF related, matrix associated, actin dependent regulator of ch | Smarcb1       | 1.09  | 0.816 | 1.13  | 0.870 | 2.14 | 0.045 | -1.04 | 0.769 | 1.08  | 0.541 |
| 1454336_at   | Cyclin C                                                            | Ccnc          | 1.84  | 0.574 | -1.14 | 0.317 | 2.15 | 0.029 | 1.38  | 0.932 | 1.32  | 0.939 |
| 1425038_at   | solute carrier family 22 (organic anion transporter), member 19     | Slc22a19      | -1.16 | 0.368 | -1.07 | 0.316 | 2.15 | 0.045 | 2.98  | 0.134 | 1.36  | 0.510 |
| 1451764_at   | MARVEL (membrane-associating) domain containing 3                   | Marveld3      | -1.37 | 0.086 | -2.65 | 0.003 | 2.16 | 0.040 | 1.11  | 0.861 | 1.76  | 0.085 |
| 1436807_x_at | tripartite motif-containing 62                                      | Trim62        | -1.26 | 0.343 | -1.63 | 0.249 | 2.16 | 0.017 | 1.24  | 0.627 | 1.5   | 0.699 |
| 1441750_x_at | RIKEN cDNA 4930447F24 gene                                          | 4930447F24Rik | 1.78  | 0.554 | 2.12  | 0.225 | 2.18 | 0.044 | 1.27  | 0.458 | 1.01  | 0.998 |
| 1436870_s_at | expressed sequence AU041783                                         | AU041783      | 2.5   | 0.658 | 1.78  | 0.815 | 2.18 | 0.026 | 1.11  | 0.911 | 1.16  | 0.958 |
| 1458839_at   | exocyst complex component 8                                         | Exoc8         | 1.06  | 0.649 | 1.34  | 0.819 | 2.18 | 0.035 | 1.51  | 0.998 | -1.23 | 0.285 |
| 1458342_at   | transmembrane protein 90a                                           | Tmem90a       | 1.13  | 0.983 | 1.37  | 0.752 | 2.18 | 0.027 | -1.66 | 0.081 | 1.01  | 0.917 |
| 1442841_at   | Tetraspanin 3                                                       | Tspan3        | -1.57 | 0.121 | 1.58  | 0.373 | 2.19 | 0.030 | 1.45  | 0.902 | 1.32  | 0.884 |
| 1431624_a_at | RIKEN cDNA 2610206B13 gene                                          | 2610206B13Rik | 0.8   | 0.292 | 3.02  | 0.018 | 2.2  | 0.036 | 1.83  | 0.547 | -1.05 | 0.980 |
| 1433240_at   | RIKEN cDNA 9430013L17 gene                                          | 9430013L17Rik | 3.17  | 0.147 | 2.11  | 0.283 | 2.2  | 0.032 | -1.4  | 0.354 | 1.52  | 0.920 |

|              |                                                                          |               |       |       |       |       |      |       |       |       |       |       |
|--------------|--------------------------------------------------------------------------|---------------|-------|-------|-------|-------|------|-------|-------|-------|-------|-------|
| 1438189_s_at | erythrocyte protein band 4.9                                             | Epb4.9        | 1.25  | 0.158 | 1.14  | 0.268 | 2.2  | 0.018 | 1.4   | 0.686 | 1.27  | 0.775 |
| 1456543_at   | prokineticin receptor 1                                                  | Prokr1        | 2.46  | 0.011 | 2.45  | 0.014 | 2.2  | 0.016 | 1.66  | 0.659 | 1.22  | 0.724 |
| 1449782_at   | expressed sequence AA517650                                              | AA517650      | -1.61 | 0.125 | -1.48 | 0.092 | 2.21 | 0.033 | 1.57  | 0.667 | -1.18 | 0.386 |
| 1456619_at   | Lipase, member H                                                         | Liph          | 1.1   | 0.897 | 1.11  | 0.329 | 2.21 | 0.043 | 1.74  | 0.562 | 1.67  | 0.203 |
| 1454360_at   | RIKEN cDNA 4930418C01 gene                                               | 4930418C01Rik | -2.94 | 0.006 | -1.08 | 0.673 | 2.22 | 0.014 | -1.37 | 0.153 | 1.13  | 0.579 |
| 1422911_at   | cerebellin 3 precursor protein                                           | Cbln3         | 1.32  | 0.616 | 1.63  | 0.511 | 2.22 | 0.010 | 1.32  | 0.961 | 1.36  | 0.954 |
| 1427634_at   | potassium voltage-gated channel, subfamily H (eag-related), membe        | Kcnh7         | 1.23  | 0.535 | 1.92  | 0.709 | 2.22 | 0.004 | -1.33 | 0.109 | -1.58 | 0.211 |
| 1429263_at   | RIKEN cDNA 4933425D22 gene                                               | 4933425D22Rik | -1.17 | 0.323 | 1.17  | 0.810 | 2.23 | 0.005 | 1.14  | 0.511 | 1.6   | 0.635 |
| 1451415_at   | RIKEN cDNA 1810011O10 gene                                               | 1810011O10Rik | 1.49  | 0.099 | 1.99  | 0.005 | 2.24 | 0.033 | 1.43  | 0.101 | 2.06  | 0.012 |
| 1421188_at   | chemokine (C-C motif) receptor 2                                         | Ccr2          | 1.01  | 0.803 | 1.23  | 0.906 | 2.24 | 0.038 | -1.13 | 0.675 | -1.76 | 0.071 |
| 1436625_at   | Fc receptor, IgG, high affinity I                                        | Fcgr1         | -1.02 | 0.567 | 1.01  | 0.585 | 2.24 | 0.018 | 1.8   | 0.163 | -1.02 | 0.972 |
| 1419908_at   | Fc receptor-like A                                                       | Fcrla         | 1.36  | 0.620 | 2.45  | 0.172 | 2.24 | 0.024 | 2.19  | 0.445 | 1.48  | 0.378 |
| 1458850_at   | Myosin, heavy polypeptide 6, cardiac muscle, alpha                       | Myh6          | -1.14 | 0.440 | -1.17 | 0.370 | 2.24 | 0.017 | -1.2  | 0.132 | -1.03 | 0.631 |
| 1425867_at   | pleckstrin homology domain containing, family A (phosphoinositide t      | Plekha4       | -1.57 | 0.151 | -1.33 | 0.362 | 2.24 | 0.006 | -1.05 | 0.406 | 1.06  | 0.986 |
| 1455405_at   | proline-serine-threonine phosphatase-interacting protein 2               | Pstpip2       | 1.25  | 0.184 | -1.28 | 0.353 | 2.24 | 0.006 | -1.01 | 0.959 | -1.38 | 0.122 |
| 1458716_at   | dual specificity phosphatase 27 (putative)                               | Dusp27        | -1.81 | 0.036 | 1.56  | 0.540 | 2.25 | 0.001 | 2.85  | 0.561 | 2.06  | 0.195 |
| 1420529_at   | neuronal d4 domain family member                                         | Neud4         | 1.23  | 0.872 | 1.82  | 0.834 | 2.25 | 0.047 | 1.44  | 0.241 | -1.79 | 0.150 |
| 1440355_at   | potassium channel tetramerisation domain containing 12b                  | Kctd12b       | 4.08  | 0.046 | 2     | 0.164 | 2.26 | 0.033 | 1.2   | 0.944 | -1.19 | 0.560 |
| 1438878_at   | RIKEN cDNA 6430537K16 gene                                               | 6430537K16Rik | 1.1   | 0.475 | 1.15  | 0.650 | 2.28 | 0.000 | -1.53 | 0.279 | -1.09 | 0.399 |
| 1422283_at   | CD40 ligand                                                              | Cd40lg        | 1.35  | 0.569 | 1.34  | 0.964 | 2.29 | 0.046 | -1.48 | 0.163 | 1.24  | 0.904 |
| 1418287_a_at | deleted in malignant brain tumors 1                                      | Dmbt1         | -1.09 | 0.365 | 1.1   | 0.582 | 2.29 | 0.036 | -1.57 | 0.087 | 1.09  | 0.587 |
| 1417600_at   | solute carrier family 15 (H+/peptide transporter), member 2              | Slc15a2       | 1.57  | 0.985 | 1.24  | 0.988 | 2.29 | 0.010 | -1.57 | 0.119 | -1.19 | 0.353 |
| 1453870_at   | RIKEN cDNA 1810018F18 gene                                               | 1810018F18Rik | 2.53  | 0.661 | 1.71  | 0.898 | 2.3  | 0.040 | 2.67  | 0.465 | 1.21  | 0.745 |
| 1459309_at   | RUN and FYVE domain containing 3                                         | Rufy3         | 1.7   | 0.544 | 1.89  | 0.833 | 2.3  | 0.037 | 1.01  | 0.847 | 1.25  | 0.766 |
| 1428837_at   | kelch-like 14 (Drosophila)                                               | Klh14         | 1.02  | 0.807 | -1.43 | 0.123 | 2.32 | 0.027 | -1.59 | 0.117 | 1.21  | 0.579 |
| 1423979_a_at | solute carrier family 25 (mitochondrial carrier, palmitoylcarnitine tran | Slc25a29      | -1.62 | 0.167 | -1.32 | 0.415 | 2.32 | 0.005 | 1.23  | 0.197 | 2.13  | 0.176 |
| 1451960_a_at | REV3-like, catalytic subunit of DNA polymerase zeta RAD54 like (S. Rev3l | Rev3l         | -1.03 | 0.233 | 1.27  | 0.586 | 2.33 | 0.032 | 2.22  | 0.955 | 1.33  | 0.841 |
| 1449856_at   | regulator of G-protein signaling 18                                      | Rgs18         | 1.28  | 0.062 | 1.05  | 0.555 | 2.33 | 0.023 | -1.1  | 0.743 | -1.08 | 0.705 |
| 1429997_at   | RIKEN cDNA 4832441B07 gene                                               | 4832441B07Rik | 1.63  | 0.055 | 1.33  | 0.645 | 2.34 | 0.022 | 1.44  | 0.581 | 1.12  | 0.976 |
| 1458903_at   | RIKEN cDNA A230057G18 gene                                               | A230057G18Rik | 2.18  | 0.152 | 2.13  | 0.184 | 2.34 | 0.035 | 1.58  | 0.158 | 1.4   | 0.827 |
| 1425313_at   | calcium response factor                                                  | Carf          | 1.98  | 0.378 | 1.67  | 0.530 | 2.34 | 0.003 | 1.3   | 0.671 | -1.79 | 0.120 |
| 1433052_at   | ELAV (embryonic lethal, abnormal vision, Drosophila)-like 2 (Hu anti     | Elavl2        | -1.2  | 0.425 | 1.51  | 0.647 | 2.34 | 0.030 | -1.84 | 0.073 | 1.72  | 0.935 |
| 1432542_at   | RIKEN cDNA 2810474C18 gene                                               | 2810474C18Rik | -1.43 | 0.369 | 1.52  | 0.061 | 2.35 | 0.004 | 1.58  | 0.893 | 1.39  | 0.636 |
| 1427818_at   | B-cell leukemia/lymphoma 2                                               | Bcl2          | -1.16 | 0.235 | -1.03 | 0.352 | 2.35 | 0.049 | 2.58  | 0.082 | 1.11  | 0.721 |
| 1433972_at   | calmodulin binding transcription activator 1                             | Camta1        | 3.97  | 0.201 | 2.47  | 0.460 | 2.35 | 0.047 | 1.5   | 0.393 | 1.07  | 0.536 |
| 1457750_at   | DNA segment, Chr 16, ERATO Doi 780, expressed                            | D16Ertd780e   | -1.25 | 0.125 | -1.48 | 0.188 | 2.36 | 0.032 | -1.13 | 0.611 | -1.38 | 0.224 |
| 1447791_s_at | guanine nucleotide binding protein, alpha 14                             | Gna14         | 1.68  | 0.918 | 1.52  | 0.645 | 2.36 | 0.048 | 1.1   | 0.660 | -1.1  | 0.329 |
| 1445412_at   | coiled-coil domain containing 73                                         | Ccdc73        | 1.11  | 0.651 | 1.12  | 0.627 | 2.37 | 0.001 | -1.03 | 0.643 | 1     | 0.815 |
| 1418013_at   | camello-like 1                                                           | Cmlp1         | -1.02 | 0.477 | 1.89  | 0.633 | 2.37 | 0.002 | 2.11  | 0.650 | 2.66  | 0.283 |
| 1432319_at   | RIKEN cDNA 1700085C21 gene                                               | 1700085C21Rik | 1.34  | 0.851 | 2     | 0.873 | 2.38 | 0.035 | 1.58  | 0.131 | -1.23 | 0.205 |
| 1418812_a_at | BarH-like 1 (Drosophila)                                                 | Barhl1        | -3.28 | 0.112 | -2.42 | 0.149 | 2.39 | 0.029 | 1.31  | 0.723 | 1     | 0.591 |
| 1441146_at   | expressed sequence C76132                                                | C76132        | -1.18 | 0.524 | -1.77 | 0.094 | 2.39 | 0.017 | -1.13 | 0.507 | 2.62  | 0.513 |
| 1447785_x_at | DNA segment, Chr 11, Wayne State University 99, expressed                | D11Wsu99e     | -1.2  | 0.563 | 1.18  | 0.614 | 2.4  | 0.039 | 1.95  | 0.262 | -1.35 | 0.124 |
| 1460336_at   | peroxisome proliferative activated receptor, gamma, coactivator 1 al     | Ppargc1a      | 1.05  | 0.384 | 1.45  | 0.536 | 2.4  | 0.022 | 1.25  | 0.937 | 1.49  | 0.759 |
| 1420669_at   | aryl hydrocarbon receptor nuclear translocator 2                         | Arnt2         | -2.33 | 0.001 | -1.68 | 0.102 | 2.41 | 0.037 | 1.63  | 0.329 | 1.02  | 0.946 |
| 1422197_at   | potassium voltage-gated channel, shaker-related subfamily, membe         | Kcna2         | 1.15  | 0.393 | 1.07  | 0.413 | 2.41 | 0.017 | 2.1   | 0.452 | -1.14 | 0.812 |
| 1437075_at   | FERM domain containing 3                                                 | Frmf3         | -1.04 | 0.853 | 1.23  | 0.474 | 2.42 | 0.002 | 2.11  | 0.393 | 1.88  | 0.184 |
| 1449252_at   | RIKEN cDNA 9030611O19 gene                                               | 9030611O19Rik | 2.23  | 0.112 | 3.49  | 0.061 | 2.43 | 0.039 | 1.52  | 0.006 | 1.69  | 0.213 |
| 1446866_at   | RIKEN cDNA A530089I17 gene                                               | A530089I17Rik | -1.24 | 0.432 | -1.48 | 0.185 | 2.43 | 0.028 | 1.06  | 0.340 | 1.5   | 0.682 |
| 1443631_at   | Diacylglycerol kinase, beta                                              | Dgkb          | -1.21 | 0.231 | -1.03 | 0.432 | 2.43 | 0.017 | 1.51  | 0.078 | 2.15  | 0.044 |
| 1442443_at   | Retinoblastoma binding protein 4                                         | Rbbp4         | 1.92  | 0.264 | -2.22 | 0.049 | 2.43 | 0.035 | -1.11 | 0.596 | 1.32  | 0.788 |
| 1425743_at   | tripartite motif protein 7                                               | Trim7         | -1.11 | 0.298 | -1.56 | 0.210 | 2.43 | 0.046 | -1.19 | 0.482 | 1.03  | 0.665 |
| 1437310_at   | Bardet-Biedl syndrome 1 homolog (human)                                  | Bbs1          | 1.74  | 0.323 | 1.23  | 0.403 | 2.44 | 0.036 | 4.06  | 0.034 | 1.35  | 0.575 |
| 1456062_at   | natriuretic peptide precursor type A                                     | Nppa          | -1.07 | 0.477 | -1.07 | 0.440 | 2.45 | 0.031 | -1.21 | 0.388 | -1.72 | 0.046 |
| 1435590_at   | RIKEN cDNA D430047L21 gene                                               | D430047L21Rik | 1.53  | 0.916 | 1.33  | 0.882 | 2.46 | 0.050 | 1.68  | 0.084 | -1.2  | 0.230 |
| 1442405_at   | Cysteine and glycine-rich protein 2 binding protein                      | Csrp2bp       | 1.2   | 0.898 | -1.54 | 0.129 | 2.47 | 0.041 | -1.28 | 0.097 | -1.74 | 0.189 |
| 1440875_a_at | radical S-adenosyl methionine domain containing 1                        | Rsad1         | -1.07 | 0.717 | 1.18  | 0.617 | 2.47 | 0.027 | -1.67 | 0.075 | 1.6   | 0.127 |
| 1418626_a_at | clusterin                                                                | Clu           | 2.27  | 0.926 | 1.93  | 0.966 | 2.48 | 0.028 | 1.49  | 0.637 | -1.28 | 0.328 |

|              |                                                                        |                      |       |       |       |       |      |       |       |       |       |       |
|--------------|------------------------------------------------------------------------|----------------------|-------|-------|-------|-------|------|-------|-------|-------|-------|-------|
| 1459884_at   | cytochrome c oxidase, subunit VIIc                                     | Cox7c                | 1.49  | 0.981 | 1.75  | 0.836 | 2.48 | 0.020 | 1.05  | 0.749 | 1.29  | 0.621 |
| 1419408_at   | sine oculis-related homeobox 6 homolog (Drosophila)                    | Six6                 | 1.42  | 0.403 | -1.2  | 0.305 | 2.48 | 0.004 | 1.77  | 0.786 | -1.74 | 0.108 |
| 1455568_at   | RIKEN cDNA 2310015A05 gene                                             | 2310015A05Rik        | 1.57  | 0.314 | 2.07  | 0.121 | 2.49 | 0.040 | 1.07  | 0.984 | -1.04 | 0.677 |
| 1429912_at   | sperm associated antigen 4-like                                        | Spag4l               | -1.35 | 0.370 | -1.9  | 0.073 | 2.49 | 0.021 | -1.16 | 0.198 | -1.04 | 0.662 |
| 1459042_at   | regulating synaptic membrane exocytosis 3                              | Rims3                | -1.35 | 0.157 | -1.66 | 0.097 | 2.5  | 0.034 | -1.32 | 0.249 | 1.36  | 0.506 |
| 1458959_at   | AF4/FMR2 family, member 4                                              | Aff4                 | 1.14  | 0.552 | 2.4   | 0.441 | 2.51 | 0.040 | 1.01  | 0.773 | 1.64  | 0.382 |
| 1457906_at   | RNA binding motif protein 13                                           | Rbm13                | 1.65  | 0.405 | 1.53  | 0.286 | 2.51 | 0.036 | 1.24  | 0.485 | 1.01  | 0.273 |
| 1454102_at   | RIKEN cDNA 5031425E22 gene                                             | 5031425E22Rik        | 2.06  | 0.210 | 2.56  | 0.669 | 2.52 | 0.034 | 1.4   | 0.083 | 1.81  | 0.687 |
| 1425530_a_at | syntaxin 3                                                             | Stx3                 | 1.79  | 0.392 | 2.36  | 0.232 | 2.53 | 0.021 | -1.04 | 0.810 | 1.57  | 0.230 |
| 1436675_at   | WD repeat domain 63                                                    | Wdr63                | 1.29  | 0.756 | 1.26  | 0.048 | 2.53 | 0.022 | 1.09  | 0.548 | 1.01  | 0.987 |
| 1458055_at   | Desmocollin 3                                                          | Dsc3                 | 1.77  | 0.135 | 1.29  | 0.783 | 2.54 | 0.028 | 2.07  | 0.116 | 1.3   | 0.689 |
| 1451677_at   | nuclear prelamin A recognition factor                                  | Narf                 | -1.06 | 0.424 | 1.06  | 0.477 | 2.54 | 0.027 | -1.06 | 0.542 | 1.29  | 0.945 |
| 1430321_at   | RIKEN cDNA A930040G15 gene                                             | A930040G15Rik        | 1.76  | 0.773 | 1.22  | 0.792 | 2.55 | 0.040 | -2.5  | 0.018 | 1.28  | 0.656 |
| 1459750_s_at | G protein-coupled receptor 123                                         | Gpr123               | 1.11  | 0.626 | 1.91  | 0.760 | 2.55 | 0.012 | 2.99  | 0.102 | 1.29  | 0.889 |
| 1446782_at   | lines homolog 2 (Drosophila)                                           | Lins2                | 1.14  | 0.542 | 1.12  | 0.453 | 2.55 | 0.038 | 2.3   | 0.055 | 1.99  | 0.113 |
| 1436074_at   | cDNA sequence AY078069                                                 | AY078069             | -1.04 | 0.469 | 1.88  | 0.896 | 2.56 | 0.042 | 1.52  | 0.040 | 1.64  | 0.491 |
| 1431718_at   | kinesin family member 15                                               | Kif15                | 2.86  | 0.625 | 1.62  | 0.779 | 2.56 | 0.003 | 2.36  | 0.469 | 1.27  | 0.887 |
| 1425116_a_at | spectrin beta 4                                                        | Spnb4                | 1.18  | 0.906 | 1.05  | 0.768 | 2.56 | 0.040 | -1.11 | 0.524 | -1.19 | 0.205 |
| 1453847_at   | RIKEN cDNA A930037O16 gene                                             | A930037O16Rik        | -1.18 | 0.375 | 2.68  | 0.587 | 2.57 | 0.010 | -1.15 | 0.382 | 2.46  | 0.521 |
| 1424937_at   | RIKEN cDNA 2310076L09 gene                                             | 2310076L09Rik        | 1     | 0.459 | -1.71 | 0.121 | 2.58 | 0.017 | -1.04 | 0.574 | 2.36  | 0.548 |
| 1427860_at   | immunoglobulin kappa chain variable 6-23 /// immunoglobulin kappa      | Igkv6-23 /// Igk-V19 | 1.45  | 0.864 | 1.01  | 0.738 | 2.58 | 0.023 | 1.7   | 0.226 | 1.51  | 0.903 |
| 1440790_x_at | RIKEN cDNA 5033414K04 gene                                             | 5033414K04Rik        | -1.08 | 0.534 | 1.11  | 0.926 | 2.59 | 0.032 | 2.03  | 0.642 | 2.21  | 0.114 |
| 1441002_at   | processing of precursor 1, ribonuclease P/MRP family, (S. cerevisiae)  | Pop1                 | 1.17  | 0.697 | 1.85  | 0.989 | 2.6  | 0.004 | 1.02  | 0.766 | 1.3   | 0.774 |
| 1455120_at   | glyoxalase domain containing 1                                         | Gloxd1               | 1.54  | 0.829 | 1.82  | 0.196 | 2.61 | 0.012 | 2.96  | 0.129 | 2     | 0.073 |
| 1427697_a_at | transformation related protein 73                                      | Trp73                | 1.2   | 0.887 | 1.25  | 0.883 | 2.61 | 0.036 | -1.15 | 0.297 | -1.13 | 0.464 |
| 1457146_at   | dedicator of cytokinesis 4                                             | Dock4                | 1.22  | 0.578 | 1.13  | 0.773 | 2.62 | 0.003 | 2.28  | 0.376 | -1.1  | 0.701 |
| 1438295_at   | Glucocorticoid induced transcript 1                                    | Gloci1               | 1.55  | 0.202 | 1.77  | 0.170 | 2.62 | 0.005 | 1.49  | 0.021 | -1.06 | 0.754 |
| 1417302_at   | REST corepressor 2                                                     | Rcor2                | 1.02  | 0.667 | 1.07  | 0.769 | 2.63 | 0.029 | 1.4   | 0.720 | 2.3   | 0.237 |
| 1423866_at   | serine (or cysteine) peptidase inhibitor, clade A, member 3K           | Serpina3k            | 1.71  | 0.331 | 3.17  | 0.068 | 2.64 | 0.001 | 1.78  | 0.838 | 1.91  | 0.231 |
| 1453976_at   | RIKEN cDNA 4432414F05 gene                                             | 4432414F05Rik        | -1.06 | 0.398 | 1.14  | 0.915 | 2.65 | 0.046 | 1.36  | 0.453 | 2.1   | 0.336 |
| 1422699_at   | arachidonate 12-lipoxygenase                                           | Alox12               | -1.1  | 0.553 | -1.23 | 0.183 | 2.65 | 0.044 | 1.21  | 0.996 | 2.11  | 0.340 |
| 1449398_at   | ribosomal protein L3-like                                              | Rpl3l                | -2.04 | 0.098 | -1.61 | 0.102 | 2.67 | 0.032 | 1.96  | 0.742 | 1.62  | 0.355 |
| 1450287_at   | neuronal PAS domain protein 3                                          | Npas3                | -1.09 | 0.262 | 1.57  | 0.687 | 2.71 | 0.030 | 1.09  | 0.812 | 3.13  | 0.232 |
| 1439064_at   | cDNA sequence BC030046                                                 | BC030046             | 1.51  | 0.682 | 1.53  | 0.521 | 2.72 | 0.040 | 1.41  | 0.296 | 1.06  | 0.956 |
| 1427466_at   | CDC91 cell division cycle 91-like 1 (S. cerevisiae)                    | Cdc91l1              | 1.01  | 0.988 | 1.15  | 0.623 | 2.73 | 0.000 | 1.05  | 0.801 | 1.09  | 0.924 |
| 1456494_a_at | tripartite motif protein 30 /// expressed sequence AI451617            | Trim30 /// AI451617  | -1.25 | 0.250 | -1.27 | 0.560 | 2.74 | 0.020 | -1.08 | 0.534 | 1.18  | 0.783 |
| 1431869_at   | RIKEN cDNA 5730419F03 gene                                             | 5730419F03Rik        | 1.2   | 0.529 | 1.76  | 0.937 | 2.75 | 0.009 | -1.26 | 0.164 | -1.55 | 0.011 |
| 1417795_at   | cell adhesion molecule with homology to L1CAM                          | Chl1                 | 1.76  | 0.387 | 1.44  | 0.867 | 2.75 | 0.006 | -2.3  | 0.044 | 1.14  | 0.846 |
| 1427436_at   | sine oculis-related homeobox 2 homolog (Drosophila)                    | Six2                 | -1.04 | 0.493 | -1.19 | 0.405 | 2.75 | 0.015 | -1.71 | 0.109 | 1.14  | 0.870 |
| 1435049_s_at | expressed sequence AI854703                                            | AI854703             | 1.1   | 0.940 | -1.18 | 0.403 | 2.76 | 0.021 | 1.76  | 0.803 | -1.35 | 0.344 |
| 1454685_at   | G protein-coupled receptor 146                                         | Gpr146               | -1.38 | 0.121 | 1.1   | 0.951 | 2.77 | 0.015 | 1.24  | 0.541 | -1.15 | 0.524 |
| 1419578_at   | mannose binding lectin (A)                                             | Mbl1                 | 1.09  | 0.689 | -1.15 | 0.386 | 2.78 | 0.004 | 1.26  | 0.966 | 2.06  | 0.095 |
| 1450261_a_at | solute carrier family 10 (sodium/bile acid cotransporter family), meml | Slc10a1              | 1.6   | 0.818 | 1.24  | 0.420 | 2.79 | 0.007 | 1.05  | 0.727 | 1.63  | 0.041 |
| 1443770_x_at | Autism susceptibility candidate 2                                      | Auts2                | 2.83  | 0.324 | 3.45  | 0.048 | 2.8  | 0.035 | 2.2   | 0.150 | 1.5   | 0.212 |
| 1449259_at   | RAB3D, member RAS oncogene family                                      | Rab3d                | 2.05  | 0.298 | 1.3   | 0.821 | 2.8  | 0.023 | 2.06  | 0.313 | 1.7   | 0.783 |
| 1453009_at   | carboxypeptidase M                                                     | Cpm                  | -1.09 | 0.161 | 2.04  | 0.829 | 2.81 | 0.031 | 1.79  | 0.155 | 1.24  | 0.747 |
| 1451964_at   | melanoma inhibitory activity 2                                         | Mia2                 | 1.82  | 0.527 | -1.23 | 0.376 | 2.82 | 0.001 | 1.9   | 0.137 | -1.36 | 0.163 |
| 1445883_at   | RAN binding protein 2                                                  | Ranbp2               | 1.15  | 0.556 | -1.05 | 0.473 | 2.83 | 0.040 | -1.12 | 0.541 | 1.19  | 0.501 |
| 1438149_at   | Expressed sequence AI449441                                            | AI449441             | -1.41 | 0.269 | -2.76 | 0.043 | 2.84 | 0.009 | 1.16  | 0.937 | -1.25 | 0.493 |
| 1444719_at   | DNA Segment, Chr 7, Mouse Genome Informatics 29                        | D7Mgi29              | 2.8   | 0.996 | 2.13  | 0.962 | 2.84 | 0.015 | 1.41  | 0.397 | 2.05  | 0.367 |
| 1453084_s_at | collagen, type XXII, alpha 1                                           | Col22a1              | 1.05  | 0.691 | 1.02  | 0.373 | 2.85 | 0.047 | 1.13  | 0.985 | 1.41  | 0.473 |
| 1422392_at   | vomer nasal 1 receptor, C6                                             | V1rc6                | 1.22  | 0.694 | 1.34  | 0.694 | 2.87 | 0.039 | 1.91  | 0.512 | -2.59 | 0.003 |
| 1421807_at   | defensin beta 6                                                        | Defb6                | 1.02  | 0.858 | 1.48  | 0.516 | 2.88 | 0.003 | 1.6   | 0.132 | 2.19  | 0.751 |
| 1445419_at   | GTP-binding protein 8 (putative)                                       | Gtpbp8               | 1.57  | 0.774 | 1.91  | 0.449 | 2.88 | 0.048 | 2.08  | 0.948 | 2.87  | 0.724 |
| 1449937_at   | placental protein 11 related                                           | Pp11r                | -1.18 | 0.300 | 1.7   | 0.893 | 2.88 | 0.012 | 1.85  | 0.453 | 2.64  | 0.374 |
| 1419016_at   | RIKEN cDNA 1700034I23 gene                                             | 1700034I23Rik        | 2.33  | 0.044 | 1.47  | 0.672 | 2.91 | 0.010 | 1.68  | 0.404 | 1.73  | 0.132 |
| 1430730_at   | RIKEN cDNA 9430024F10 gene                                             | 9430024F10Rik        | -1.69 | 0.188 | -1.27 | 0.242 | 2.91 | 0.025 | -1.09 | 0.796 | 2.63  | 0.050 |
| 1420363_at   | Bcl2-interacting killer                                                | Bik                  | 1.02  | 0.728 | 1.11  | 0.770 | 2.91 | 0.036 | -1.2  | 0.281 | 1.51  | 0.395 |

|              |                                                                        |               |       |       |       |       |      |       |       |       |       |       |
|--------------|------------------------------------------------------------------------|---------------|-------|-------|-------|-------|------|-------|-------|-------|-------|-------|
| 1422921_at   | pre-B lymphocyte gene 3                                                | Vpreb3        | -1.04 | 0.973 | -1    | 0.919 | 2.91 | 0.026 | -1.23 | 0.312 | -1.13 | 0.691 |
| 1450318_a_at | purinergic receptor P2Y, G-protein coupled 2                           | P2ry2         | 4.17  | 0.635 | 3.51  | 0.798 | 2.92 | 0.038 | 1.37  | 0.484 | 1.53  | 0.389 |
| 1438279_at   | Dipeptidylpeptidase 4                                                  | Dpp4          | -1.36 | 0.263 | -1.32 | 0.207 | 2.93 | 0.011 | -1.12 | 0.485 | -1.06 | 0.671 |
| 1457796_at   | Ubiquitin protein ligase E3 component n-recogin 1                      | Ubr1          | 1.11  | 0.918 | 1.13  | 0.833 | 2.94 | 0.048 | 2.18  | 0.215 | 1.01  | 0.812 |
| 1442507_at   | whirlin                                                                | Whrn          | -1.15 | 0.226 | -1.25 | 0.245 | 2.94 | 0.034 | 2.08  | 0.353 | 2     | 0.087 |
| 1417411_at   | nucleosome assembly protein 1-like 5                                   | Nap1l5        | -1.02 | 0.584 | 1.28  | 0.057 | 2.95 | 0.014 | 1.55  | 0.213 | 1.56  | 0.121 |
| 1442235_at   | Pleiomorphic adenoma gene-like 2                                       | Plagl2        | 1.52  | 0.943 | 1.73  | 0.688 | 2.95 | 0.010 | 1.52  | 0.750 | -1.03 | 0.706 |
| 1438475_at   | cDNA sequence AB124611                                                 | AB124611      | 1.1   | 0.845 | -1.19 | 0.849 | 2.96 | 0.004 | 1.6   | 0.795 | 1.23  | 0.960 |
| 1458649_at   | expressed sequence Al662245                                            | Al662245      | 1.67  | 0.209 | 2.08  | 0.485 | 2.96 | 0.046 | -1.21 | 0.214 | -1.1  | 0.542 |
| 1442974_at   | DNA segment, Chr 6, ERATO Doi 160, expressed                           | D6ErtD160e    | -1.21 | 0.643 | -1.14 | 0.482 | 2.96 | 0.013 | 2.19  | 0.140 | 1.8   | 0.590 |
| 1456562_x_at | KIAA0415 protein                                                       | KIAA0415      | 1.27  | 0.534 | 1.66  | 0.808 | 2.96 | 0.003 | -1.64 | 0.149 | 1.21  | 0.779 |
| 1448940_at   | tripartite motif protein 21                                            | Trim21        | 2.57  | 0.753 | 1.75  | 0.004 | 2.97 | 0.013 | 1.14  | 0.363 | 1.81  | 0.015 |
| 1430239_at   | RIKEN cDNA 5430421F17 gene                                             | 5430421F17Rik | 1.8   | 0.110 | 1.64  | 0.743 | 2.98 | 0.033 | 2.89  | 0.425 | -1.01 | 0.951 |
| 1430181_at   | H1 histone family, member N, testis-specific                           | H1fnt         | 1.52  | 0.653 | 1.12  | 0.943 | 3    | 0.008 | -1    | 0.596 | -1.04 | 0.769 |
| 1445557_at   | RIKEN cDNA 0610040B10 gene                                             | 0610040B10Rik | 1.32  | 0.830 | 1.25  | 0.580 | 3.02 | 0.032 | 1.2   | 0.910 | 1.98  | 0.545 |
| 1439728_at   | RIKEN cDNA D330027H18 gene                                             | D330027H18Rik | 1.31  | 0.766 | 1.35  | 0.685 | 3.02 | 0.017 | -1    | 0.997 | 2.26  | 0.800 |
| 1422773_at   | myelin transcription factor 1                                          | Myt1          | -1.22 | 0.339 | 1.63  | 0.481 | 3.03 | 0.029 | -1.22 | 0.406 | 1.85  | 0.438 |
| 1430988_at   | RIKEN cDNA 2810407C02 gene                                             | 2810407C02Rik | 1.8   | 0.676 | 2.49  | 0.121 | 3.04 | 0.000 | 1.58  | 0.792 | 2.16  | 0.161 |
| 1436566_at   | Rab40b, member RAS oncogene family                                     | Rab40b        | 1.59  | 0.160 | -1.18 | 0.092 | 3.04 | 0.043 | -1.06 | 0.643 | 1.14  | 0.321 |
| 1447144_at   | RIKEN cDNA 9130011E15 gene                                             | 9130011E15Rik | -1.1  | 0.411 | -1.12 | 0.368 | 3.05 | 0.045 | 3.61  | 0.061 | 1.74  | 0.774 |
| 1452993_at   | RIKEN cDNA 5430416O09 gene                                             | 5430416O09Rik | 1.27  | 0.727 | 1.63  | 0.748 | 3.06 | 0.002 | -1.48 | 0.136 | 1.55  | 0.917 |
| 1444470_x_at | Bone morphogenetic protein 5                                           | Bmp5          | 1.12  | 0.683 | -1.14 | 0.374 | 3.1  | 0.041 | 1.39  | 0.949 | -1.41 | 0.182 |
| 1453528_at   | leukotriene A4 hydrolase                                               | Lta4h         | 1.2   | 0.588 | 1.15  | 0.585 | 3.11 | 0.038 | 1.04  | 0.475 | 1.21  | 0.928 |
| 1422708_at   | phosphoinositide-3-kinase, catalytic, gamma polypeptide                | Pik3cg        | -1.54 | 0.162 | -1.64 | 0.148 | 3.13 | 0.011 | 2.36  | 0.049 | 1.7   | 0.483 |
| 1427554_at   | helicase, mus308-like (Drosophila)                                     | Hel308        | 3.24  | 0.105 | 2.46  | 0.183 | 3.15 | 0.033 | 1.34  | 0.044 | -1.03 | 0.610 |
| 1421390_at   | solute carrier family 12, member 1                                     | Slc12a1       | 1.35  | 0.935 | 1.3   | 0.873 | 3.15 | 0.037 | -1.07 | 0.433 | 1.51  | 0.354 |
| 1419014_at   | Rhesus blood group-associated A glycoprotein                           | Rhag          | 1.41  | 0.770 | 3.34  | 0.133 | 3.17 | 0.001 | 1.51  | 0.787 | 3.28  | 0.341 |
| 1443541_at   | Hypothetical gene supported by AK039231; AK039519; AK039710; LOC381438 |               | 2.69  | 0.170 | 2.04  | 0.876 | 3.18 | 0.049 | 1.97  | 0.721 | 2.32  | 0.066 |
| 1452475_at   | proprotein convertase subtilisin/kexin type 5                          | Pcsk5         | -1.23 | 0.499 | 1.15  | 0.807 | 3.2  | 0.022 | 1.46  | 0.436 | 1.48  | 0.973 |
| 1438437_a_at | RIKEN cDNA 4933439C10 gene                                             | 4933439C10Rik | 1.21  | 0.681 | 1.58  | 0.270 | 3.21 | 0.016 | 2.54  | 0.118 | 1.4   | 0.899 |
| 1423619_at   | RAS, dexamethasone-induced 1                                           | Rasd1         | -1.01 | 0.706 | 1.35  | 0.403 | 3.22 | 0.025 | 1.95  | 0.288 | 1.27  | 0.542 |
| 1455632_at   | Guanine nucleotide binding protein, beta 5                             | Gnb5          | 2.65  | 0.795 | 1.32  | 0.953 | 3.24 | 0.048 | 1.42  | 0.439 | 1.35  | 0.205 |
| 1448982_at   | kalikrein 6                                                            | Klk6          | 1.57  | 0.863 | 1.05  | 0.674 | 3.28 | 0.003 | 1.81  | 0.201 | 3.12  | 0.269 |
| 1456265_at   | hypothetical protein LOC624866                                         | LOC624866     | 1     | 0.585 | -1.18 | 0.396 | 3.28 | 0.046 | -1.02 | 0.882 | 1.64  | 0.300 |
| 1449881_a_at | calcium-sensing receptor                                               | Casr          | -1.14 | 0.464 | 1.06  | 0.752 | 3.29 | 0.009 | 1.6   | 0.143 | -1.18 | 0.237 |
| 1424553_at   | Gup1, glycerol uptake/transporter homolog (yeast)                      | Gup1          | 1.1   | 0.731 | -1.65 | 0.292 | 3.29 | 0.039 | -1.45 | 0.263 | 1.5   | 0.832 |
| 1454396_at   | RIKEN cDNA 4632409D06 gene                                             | 4632409D06Rik | 1.14  | 0.996 | 1.85  | 0.194 | 3.3  | 0.043 | 1.93  | 0.164 | 1.26  | 0.783 |
| 1444770_at   | RIKEN cDNA 1700095A13 gene                                             | 1700095A13Rik | -1.43 | 0.289 | 1.43  | 0.697 | 3.31 | 0.025 | -1.92 | 0.144 | 1.35  | 0.455 |
| 1433791_at   | RAB9B, member RAS oncogene family                                      | Rab9b         | -1.01 | 0.373 | 1.82  | 0.620 | 3.31 | 0.023 | 1.72  | 0.502 | 1.67  | 0.824 |
| 1457158_at   | RIKEN cDNA 0610039J04 gene                                             | 0610039J04Rik | 1.54  | 0.632 | -1.33 | 0.276 | 3.35 | 0.025 | 2.8   | 0.075 | 1.58  | 0.003 |
| 1431260_at   | RIKEN cDNA 4833417C18 gene                                             | 4833417C18Rik | 1.25  | 0.979 | 1.63  | 0.671 | 3.36 | 0.045 | -1.76 | 0.123 | -1.14 | 0.385 |
| 1424354_at   | RIKEN cDNA 1110007F12 gene                                             | 1110007F12Rik | 3.47  | 0.083 | 4.84  | 0.191 | 3.42 | 0.001 | 1.34  | 0.865 | 1.63  | 0.144 |
| 1424303_at   | DEP domain containing 7                                                | Depdc7        | 1.07  | 0.576 | 1.07  | 0.288 | 3.42 | 0.033 | 1.98  | 0.020 | 2.96  | 0.026 |
| 1435061_at   | nudix (nucleoside diphosphate linked moiety X)-type motif 10           | Nudt10        | 2.11  | 0.491 | 1.46  | 0.480 | 3.42 | 0.011 | -1.5  | 0.173 | 1.14  | 0.383 |
| 1452815_at   | purinergic receptor P2Y, G-protein coupled 10                          | P2ry10        | 1.19  | 0.796 | 1.19  | 0.787 | 3.42 | 0.002 | 1.85  | 0.262 | -1.07 | 0.598 |
| 1422300_at   | noggin                                                                 | Nog           | 2.78  | 0.120 | 3.18  | 0.178 | 3.43 | 0.002 | 1.25  | 0.103 | 1     | 0.950 |
| 1425083_at   | otoraplin                                                              | Otor          | 2.51  | 0.488 | 2.25  | 0.039 | 3.43 | 0.020 | 1.02  | 0.261 | 1.19  | 0.957 |
| 1440005_at   | hypothetical protein C730009D12                                        | C730009D12    | 1.17  | 0.603 | 1.69  | 0.797 | 3.44 | 0.016 | 1.37  | 0.393 | -1.22 | 0.346 |
| 1456178_at   | BMP and activin membrane-bound inhibitor, pseudogene (Xenopus          | Bambi-ps1     | 2.55  | 0.349 | 2.41  | 0.014 | 3.5  | 0.008 | 1.67  | 0.965 | 2.08  | 0.379 |
| 1453884_at   | RIKEN cDNA 4930402K13 gene                                             | 4930402K13Rik | 1.17  | 0.515 | 1.97  | 0.332 | 3.51 | 0.032 | 2.34  | 0.276 | 1.46  | 0.114 |
| 1424450_at   | G protein-coupled receptor, family C, group 5, member C                | Gprc5c        | 1.62  | 0.362 | 1.23  | 0.449 | 3.53 | 0.010 | -1.25 | 0.288 | 1.34  | 0.919 |
| 1444029_at   | poly (ADP-ribose) polymerase family, member 11                         | Parp11        | 1.97  | 0.095 | 1.09  | 0.831 | 3.54 | 0.018 | -2.2  | 0.035 | -1.28 | 0.355 |
| 1460139_at   | expressed sequence C79256                                              | C79256        | 1.83  | 0.703 | 1.93  | 0.636 | 3.56 | 0.027 | 1.72  | 0.650 | 1.58  | 0.961 |
| 1459272_at   | Pellino 1                                                              | Pel1o         | 1.8   | 0.258 | 2.11  | 0.076 | 3.56 | 0.041 | 1.72  | 0.319 | 1.55  | 0.618 |
| 1440828_x_at | PHD finger protein 7                                                   | Phf7          | 1.39  | 0.797 | 2.52  | 0.409 | 3.58 | 0.012 | 1.65  | 0.771 | 1.99  | 0.836 |
| 1420590_at   | hyaluronan synthase1                                                   | Has1          | 1.1   | 0.655 | 1.57  | 0.642 | 3.64 | 0.033 | 1.48  | 0.498 | -1.46 | 0.235 |
| 1416097_at   | leucine rich repeat containing 4                                       | Lrrc4         | 1.17  | 0.856 | 2.74  | 0.439 | 3.68 | 0.041 | 2.06  | 0.863 | 1.3   | 0.834 |
| 1423469_at   | RIKEN cDNA 1700129C05 gene                                             | 1700129C05Rik | 2.23  | 0.301 | 2.03  | 0.403 | 3.69 | 0.009 | 1.04  | 0.965 | 1.13  | 0.779 |

|              |                                                  |               |       |       |       |       |      |       |       |       |       |       |
|--------------|--------------------------------------------------|---------------|-------|-------|-------|-------|------|-------|-------|-------|-------|-------|
| 1454098_at   | olfactory receptor 112                           | Olf1r112      | 1.26  | 0.692 | -1.12 | 0.581 | 3.71 | 0.044 | 1.78  | 0.938 | -1.47 | 0.172 |
| 1449424_at   | pleckstrin 2                                     | Plek2         | 1.02  | 0.927 | 1.07  | 0.968 | 3.73 | 0.042 | -1.71 | 0.063 | -1.24 | 0.267 |
| 1418619_at   | intercellular adhesion molecule 5, telencephalin | Icam5         | 1.55  | 0.730 | 2.6   | 0.144 | 3.75 | 0.034 | 1.61  | 0.517 | 4.1   | 0.014 |
| 1433172_at   | RIKEN cDNA 3110049I03 gene                       | 3110049I03Rik | 2.27  | 0.656 | 2.19  | 0.701 | 3.78 | 0.014 | 1.49  | 0.811 | -1.35 | 0.149 |
| 1440475_at   | expressed sequence AW011738                      | AW011738      | -1.18 | 0.229 | 1.84  | 0.898 | 3.79 | 0.015 | 2.46  | 0.164 | 1.02  | 0.511 |
| 1451260_at   | aldehyde dehydrogenase 1 family, member B1       | Aldh1b1       | 3.62  | 0.095 | 2.65  | 0.198 | 3.83 | 0.006 | 1.27  | 0.380 | 1.39  | 0.743 |
| 1454660_at   | RIKEN cDNA 1100001E04 gene                       | 1100001E04Rik | 2.3   | 0.239 | -1.29 | 0.247 | 3.89 | 0.049 | 1.36  | 0.242 | -1.16 | 0.451 |
| 1444207_at   | Camello-like 3                                   | Cml3          | 1.54  | 0.662 | 1.44  | 0.561 | 3.94 | 0.033 | 1.15  | 0.861 | 1.87  | 0.283 |
| 1447811_s_at | adhesion molecule with Ig like domain 1          | Amigo1        | 2.2   | 0.480 | 2.38  | 0.618 | 4.11 | 0.046 | 2.06  | 0.468 | 1.08  | 0.310 |
| 1432166_at   | RIKEN cDNA E130018N17 gene                       | E130018N17Rik | 1.05  | 0.735 | 1.43  | 0.675 | 4.17 | 0.019 | 2.57  | 0.218 | 1.47  | 0.493 |
| 1442325_at   | TBC1 domain family, member 24                    | Tbc1d24       | 1.62  | 0.397 | 2.13  | 0.708 | 4.71 | 0.015 | 1.19  | 0.715 | 2.69  | 0.111 |
| 1423497_at   | kelch-like 10 (Drosophila)                       | Klhl10        | -1.1  | 0.373 | 2.59  | 0.157 | 5.64 | 0.034 | 1.73  | 0.280 | 1.37  | 0.343 |

**Supplementary table 4. List of significant expression profiles of CSB cells irradiated with 0.6J/m2 of UV (gray color) as compared to non-irradiated CSB cells**

| code         | Gene Title                                                      | Symbol        | WT_0.6J/m2 | p     | WT_4J/m2 | p     | XPA_0.6J/m2 | p     | CSB_0.6J/m2 | p     | DKO_0.6J/m2 | p     |
|--------------|-----------------------------------------------------------------|---------------|------------|-------|----------|-------|-------------|-------|-------------|-------|-------------|-------|
| 1430941_at   | Bardet-Biedl syndrome 7                                         | Bbs7          | 1.06       | 0.539 | 1.51     | 0.318 | 1.64        | 0.346 | -3.92       | 0.005 | 2.44        | 0.162 |
| 1459256_at   | Neuropilin 2                                                    | Nrp2          | 1.13       | 0.470 | -1.16    | 0.289 | -1.45       | 0.098 | -3.73       | 0.039 | 1.01        | 0.523 |
| 1442703_at   | cDNA sequence AK220484                                          | AK220484      | 1.83       | 0.466 | 1.17     | 0.247 | 1.24        | 0.887 | -3.66       | 0.016 | 2.04        | 0.144 |
| 1425992_at   | solute carrier family 6, member 5                               | Slc6a5        | 1.72       | 0.805 | 1.81     | 0.944 | 1.78        | 0.100 | -3.66       | 0.002 | 2.25        | 0.515 |
| 1449794_x_at | Cathepsin F                                                     | Ctsf          | -1.28      | 0.336 | -1.03    | 0.445 | 1.16        | 0.295 | -3.58       | 0.050 | -3.13       | 0.036 |
| 1431156_at   | RIKEN cDNA 9430040K09 gene                                      | 9430040K09Rik | 2.53       | 0.597 | 1.23     | 0.360 | -2.37       | 0.058 | -3.51       | 0.003 | -2.28       | 0.069 |
| 1438861_at   | basonuclin 2                                                    | Bnc2          | -1.43      | 0.148 | -8.88    | 0.007 | -2.42       | 0.029 | -3.5        | 0.001 | -4.02       | 0.002 |
| 1432170_at   | Ts translation elongation factor, mitochondrial                 | Tsfm          | 1.04       | 0.471 | 1.46     | 0.593 | -1.03       | 0.352 | -3.46       | 0.021 | 1.36        | 0.903 |
| 1416302_at   | early B-cell factor 1                                           | Ebf1          | 2.21       | 0.743 | -1.95    | 0.072 | -3.29       | 0.002 | -3.45       | 0.000 | -3.44       | 0.006 |
| 1448600_s_at | vav 3 oncogene                                                  | Vav3          | 1.42       | 0.896 | 1.86     | 0.969 | 1.31        | 0.501 | -3.4        | 0.003 | -1.03       | 0.498 |
| 1441416_at   | inositol polyphosphate-4-phosphatase, type II                   | Inpp4b        | 1.38       | 0.500 | 1.4      | 0.535 | 1.5         | 0.762 | -3.39       | 0.022 | -1.06       | 0.622 |
| 1432711_at   | RIKEN cDNA 4933425M03 gene                                      | 4933425M03Rik | 3.56       | 0.169 | 2.69     | 0.328 | 1.06        | 0.347 | -3.36       | 0.012 | -1.58       | 0.058 |
| 1417498_at   | serine (or cysteine) peptidase inhibitor, clade F, member 2     | Serpinf2      | 1.39       | 0.735 | -1.19    | 0.411 | 3.35        | 0.629 | -3.28       | 0.003 | 1.23        | 0.476 |
| 1423530_at   | serine/threonine kinase 32C                                     | Stk32c        | 2.77       | 0.742 | 1.84     | 0.884 | 1.1         | 0.751 | -3.17       | 0.000 | 1.72        | 0.693 |
| 1431785_at   | ribonuclease T2                                                 | Rnaset2       | -1.16      | 0.622 | 1.03     | 0.850 | 1.24        | 0.718 | -3.13       | 0.021 | 1.86        | 0.979 |
| 1444646_at   | RIKEN cDNA 8430420F16 gene                                      | 8430420F16Rik | -1.05      | 0.484 | -2.32    | 0.067 | -2.75       | 0.064 | -3.12       | 0.008 | -2.07       | 0.132 |
| 1460535_at   | golgi autoantigen, golgin subfamily b, macrogolgin 1            | Golgb1        | 1.58       | 0.405 | 1.64     | 0.116 | 1.47        | 0.675 | -3.09       | 0.004 | -1.14       | 0.331 |
| 1438294_at   | ataxin 1                                                        | Atxn1         | 1          | 0.863 | -5.21    | 0.001 | -2.99       | 0.004 | -3.03       | 0.001 | -3.85       | 0.010 |
| 1455256_at   | TRAF2 and NCK interacting kinase                                | Tnik          | -1.48      | 0.160 | -3.74    | 0.050 | -1.76       | 0.160 | -3.01       | 0.002 | -2.29       | 0.029 |
| 1458983_at   | expressed sequence AU015559                                     | AU015559      | 1.38       | 0.736 | 2.16     | 0.742 | 1.76        | 0.258 | -2.99       | 0.029 | -1.61       | 0.105 |
| 1442373_at   | RIKEN cDNA 2610203C20 gene                                      | 2610203C20Rik | 1.13       | 0.980 | 1.44     | 0.736 | 1.4         | 0.654 | -2.98       | 0.031 | -1.04       | 0.246 |
| 1425538_x_at | CEA-related cell adhesion molecule 1                            | Ceacam1       | 1.67       | 0.315 | 1.54     | 0.249 | -1.09       | 0.424 | -2.97       | 0.002 | 2.14        | 0.923 |
| 1450696_at   | proteasome subunit, beta type 9                                 | Ptsmb9        | -1.35      | 0.401 | -1.25    | 0.112 | 1.42        | 0.670 | -2.97       | 0.001 | -1.76       | 0.207 |
| 1447405_at   | Expressed sequence AI449023                                     | AI449023      | -1.34      | 0.290 | 1.31     | 0.969 | 1.4         | 0.857 | -2.94       | 0.012 | 2.18        | 0.423 |
| 1422306_at   | lipocalin 3                                                     | Lcn3          | 1.1        | 0.670 | -1.37    | 0.356 | 1.94        | 0.862 | -2.92       | 0.042 | 2.39        | 0.372 |
| 1451893_s_at | membrane associated guanylate kinase                            | Magi1         | -1.72      | 0.219 | -4.1     | 0.103 | -1.16       | 0.197 | -2.92       | 0.005 | -2.04       | 0.005 |
| 1441545_at   | RIKEN cDNA 9230115F04 gene                                      | 9230115F04Rik | 2.44       | 0.537 | 2.58     | 0.302 | -1.05       | 0.655 | -2.91       | 0.014 | 1.11        | 0.452 |
| 1430142_at   | transglutaminase 5                                              | Tgm5          | -1.31      | 0.154 | 1.81     | 0.487 | 1.31        | 0.969 | -2.88       | 0.019 | 1.02        | 0.630 |
| 1436799_at   | RIKEN cDNA D230005D02 gene                                      | D230005D02Rik | -1.63      | 0.145 | -1.5     | 0.240 | -1.83       | 0.143 | -2.84       | 0.020 | -1.49       | 0.120 |
| 1417436_at   | like-glycosyltransferase                                        | Large         | 1.72       | 0.830 | 1.09     | 0.853 | 1.31        | 0.532 | -2.81       | 0.026 | -1.2        | 0.408 |
| 1438337_x_at | RIKEN cDNA 9930032O22 gene                                      | 9930032O22Rik | -1.24      | 0.147 | -1.13    | 0.362 | 1.62        | 0.686 | -2.76       | 0.032 | -1.02       | 0.485 |
| 1440265_at   | Jun proto-oncogene related gene d1                              | Jund1         | 1.4        | 0.694 | 2.01     | 0.555 | 1.14        | 0.316 | -2.76       | 0.018 | -1.07       | 0.830 |
| 1434102_at   | nuclear factor I/B                                              | Nfib          | -1.04      | 0.524 | -1.38    | 0.300 | -1.03       | 0.807 | -2.75       | 0.013 | 1.66        | 0.702 |
| 1458995_at   | Expressed sequence AA408296                                     | AA408296      | 1.04       | 0.875 | 1.37     | 0.282 | 1.5         | 0.707 | -2.72       | 0.021 | 2.73        | 0.200 |
| 1426150_at   | GIPC PDZ domain containing family, member 3                     | Gipc3         | 1.89       | 0.919 | 1.11     | 0.548 | -1          | 0.984 | -2.71       | 0.031 | -1.86       | 0.112 |
| 1456423_at   | methyl-CpG binding domain protein 5                             | Mbd5          | -1.34      | 0.162 | -6.08    | 0.005 | -2.29       | 0.026 | -2.69       | 0.001 | -2.88       | 0.005 |
| 1430707_s_at | RIKEN cDNA 1700081D17 gene                                      | 1700081D17Rik | 1.69       | 0.048 | -1.01    | 0.759 | 1.03        | 0.915 | -2.66       | 0.002 | 1.88        | 0.264 |
| 1442782_at   | Kelch-like 8 (Drosophila)                                       | Klhl8         | 1.05       | 0.917 | 1.39     | 0.098 | 1.22        | 0.610 | -2.64       | 0.006 | 2.12        | 0.349 |
| 1431867_a_at | RIKEN cDNA 1700007B13 gene                                      | 1700007B13Rik | 1.18       | 0.569 | 1.11     | 0.389 | 1.16        | 0.706 | -2.63       | 0.038 | -1.2        | 0.420 |
| 1440161_at   | Matrix metalloproteinase 16                                     | Mmp16         | 1.53       | 0.953 | 1.14     | 0.638 | 1.55        | 0.660 | -2.63       | 0.023 | 1.14        | 0.850 |
| 1448312_at   | proteasome convertase subtilisin/kexin type 2                   | Pcsk2         | 1.1        | 0.431 | -1.8     | 0.167 | -1.23       | 0.483 | -2.63       | 0.003 | 1.51        | 0.286 |
| 1459304_at   | RIKEN cDNA A730054J21 gene                                      | A730054J21Rik | 1.03       | 0.545 | -1.34    | 0.232 | -1.67       | 0.053 | -2.61       | 0.009 | -1.15       | 0.485 |
| 1452342_at   | amyloid beta (A4) precursor protein-binding, family B, member 2 | Apbb2         | -1.24      | 0.242 | -4.81    | 0.045 | -2.12       | 0.007 | -2.59       | 0.000 | -2.8        | 0.010 |
| 1450094_at   | RAN binding protein 17                                          | Ranbp17       | -1.28      | 0.388 | -3.11    | 0.070 | 1.65        | 0.947 | -2.59       | 0.026 | 1.78        | 0.476 |
| 1429969_at   | RIKEN cDNA 4833403J16 gene                                      | 4833403J16Rik | 1.77       | 0.764 | 1.71     | 0.204 | 1.41        | 0.692 | -2.58       | 0.050 | 1.47        | 0.594 |
| 1424625_a_at | DENN/MADD domain containing 1A                                  | Dennd1a       | -1.06      | 0.474 | -2.94    | 0.002 | -1.95       | 0.016 | -2.58       | 0.012 | -2.85       | 0.032 |
| 1447523_at   | Zinc finger protein 294                                         | Zfp294        | 1.68       | 0.705 | -2.41    | 0.175 | 2.96        | 0.472 | -2.57       | 0.004 | 2.33        | 0.318 |
| 1454421_at   | RIKEN cDNA 4930423D22 gene                                      | 4930423D22Rik | 1.23       | 0.518 | 1.71     | 0.036 | -1.45       | 0.241 | -2.56       | 0.001 | -1.09       | 0.384 |
| 1439397_at   | formin 1                                                        | Fmn1          | -1.32      | 0.348 | -4.27    | 0.117 | -1.6        | 0.001 | -2.56       | 0.002 | -2.54       | 0.000 |
| 1441254_at   | RIKEN cDNA 1810008K04 gene                                      | 1810008K04Rik | -2.45      | 0.202 | -2.13    | 0.271 | -2.14       | 0.070 | -2.54       | 0.031 | -1.82       | 0.066 |
| 1433335_at   | RIKEN cDNA 4930405G09 gene                                      | 4930405G09Rik | 1.26       | 0.768 | 1.7      | 0.568 | 2.47        | 0.348 | -2.54       | 0.006 | 1.8         | 0.020 |
| 1457924_at   | muscleblind-like 1 (Drosophila)                                 | Mbn1          | 1.46       | 0.565 | 2.23     | 0.989 | 1.1         | 0.562 | -2.53       | 0.006 | -1.3        | 0.319 |
| 1438975_x_at | zinc finger, DHHC domain containing 14                          | Zdhhc14       | -1.61      | 0.294 | -5.72    | 0.178 | -1.91       | 0.032 | -2.53       | 0.001 | -2.16       | 0.055 |

|              |                                                                         |                          |       |       |       |       |       |       |       |       |       |       |
|--------------|-------------------------------------------------------------------------|--------------------------|-------|-------|-------|-------|-------|-------|-------|-------|-------|-------|
| 1431458_at   | RIKEN cDNA 4921507L20 gene                                              | 4921507L20Rik            | -1.56 | 0.023 | -1.11 | 0.487 | 1.3   | 0.406 | -2.52 | 0.017 | 1.36  | 0.436 |
| 1440990_at   | cDNA sequence BC056349                                                  | BC056349                 | -1.84 | 0.199 | -4.12 | 0.094 | -1.94 | 0.002 | -2.52 | 0.009 | -2.07 | 0.013 |
| 1449926_at   | tumor necrosis factor (ligand) superfamily, member 7                    | Tnfsf7                   | 1.18  | 0.939 | 1.32  | 0.158 | -1.32 | 0.300 | -2.51 | 0.019 | 1.46  | 0.194 |
| 1430321_at   | RIKEN cDNA A930040G15 gene                                              | A930040G15Rik            | 1.76  | 0.773 | 1.22  | 0.792 | 2.55  | 0.040 | -2.5  | 0.018 | 1.28  | 0.656 |
| 1426116_at   | ankyrin repeat and SOCS box-containing 18                               | Asb18                    | -1.21 | 0.360 | -1.1  | 0.439 | 1.03  | 0.948 | -2.5  | 0.030 | -1.22 | 0.097 |
| 1453232_at   | calreticulin 3                                                          | Calr3                    | -2.26 | 0.016 | -1.39 | 0.128 | 2.14  | 0.951 | -2.49 | 0.033 | 1.06  | 0.946 |
| 1443076_at   | RIKEN cDNA D030041N04 gene                                              | D030041N04Rik            | 1.31  | 0.563 | 1.5   | 0.748 | -1.08 | 0.451 | -2.49 | 0.035 | 1.3   | 0.857 |
| 1457275_at   | desmuslin                                                               | Dmn                      | 1.34  | 0.816 | 1.82  | 0.307 | -1.66 | 0.327 | -2.49 | 0.047 | 2.33  | 0.382 |
| 1447828_x_at | RIKEN cDNA 2310005P05 gene                                              | RIKEN cDNA 2310005P05Rik | 1.04  | 0.702 | 1.46  | 0.615 | 1.7   | 0.342 | -2.48 | 0.033 | 1.73  | 0.849 |
| 1420166_at   | Deoxynucleotidyltransferase, terminal                                   | Dntt                     | -1.32 | 0.183 | -1.51 | 0.241 | 1.37  | 0.178 | -2.48 | 0.016 | 1.05  | 0.993 |
| 1455472_at   | RIKEN cDNA A630071D13 gene                                              | A630071D13Rik            | -1.32 | 0.140 | -1.42 | 0.183 | 1.74  | 0.201 | -2.47 | 0.026 | -1.36 | 0.302 |
| 1435286_at   | expressed sequence AW125296                                             | AW125296                 | 1.6   | 0.438 | 2.57  | 0.351 | 1.77  | 0.912 | -2.47 | 0.049 | -1.07 | 0.347 |
| 1452819_at   | latrophilin 3                                                           | Lphn3                    | 1.12  | 0.926 | 1.83  | 0.169 | 1.21  | 0.779 | -2.46 | 0.004 | -1.33 | 0.281 |
| 1440619_at   | mitogen activated protein kinase 8 interacting protein 1                | Mapk8ip1                 | 2.14  | 0.611 | 1.91  | 0.718 | 1.21  | 0.971 | -2.46 | 0.038 | 1.8   | 0.691 |
| 1456572_x_at | chaperonin subunit 4 (delta)                                            | Cct4                     | -1.25 | 0.311 | -1.37 | 0.297 | -1.27 | 0.107 | -2.45 | 0.013 | 2.36  | 0.290 |
| 1459318_at   | semaphorin 6D                                                           | Sema6d                   | -1.11 | 0.120 | -1.31 | 0.277 | -1.15 | 0.579 | -2.45 | 0.006 | -1.04 | 0.999 |
| 1432528_at   | RIKEN cDNA 1700021P04 gene                                              | 1700021P04Rik            | 2.31  | 0.569 | 3.66  | 0.449 | -1.33 | 0.206 | -2.44 | 0.030 | 1.43  | 0.782 |
| 1457920_at   | RIKEN cDNA C130026L21 gene                                              | C130026L21Rik            | 1.52  | 0.923 | -1.04 | 0.507 | -1.34 | 0.349 | -2.44 | 0.041 | -1.01 | 0.488 |
| 1419060_at   | granzyme B                                                              | Gzmb                     | -1.18 | 0.475 | -1.87 | 0.084 | -1.07 | 0.473 | -2.44 | 0.018 | -1.07 | 0.752 |
| 1421396_at   | proprotein convertase subtilisin/kexin type 1                           | Pcsk1                    | 1.79  | 0.729 | 1.38  | 0.475 | -1.03 | 0.677 | -2.44 | 0.019 | 1.08  | 0.981 |
| 1437751_at   | peroxisome proliferative activated receptor, gamma, coactivator 1a      | Ppargc1a                 | -1.11 | 0.383 | -2.43 | 0.080 | 2.3   | 0.325 | -2.44 | 0.019 | 2.12  | 0.327 |
| 1443014_at   | RIKEN cDNA 4833403I15 gene                                              | 4833403I15Rik            | 2.34  | 0.353 | 1.19  | 0.913 | -1.76 | 0.173 | -2.43 | 0.034 | 1.36  | 0.858 |
| 1426033_at   | regulator of G-protein signaling 9                                      | Rgs9                     | 2.22  | 0.774 | 3.22  | 0.526 | -1.21 | 0.398 | -2.42 | 0.003 | 1.03  | 0.907 |
| 1440519_at   | trans-acting transcription factor 8                                     | Sp8                      | 1.39  | 0.575 | 1.21  | 0.591 | 1.13  | 0.384 | -2.42 | 0.024 | 2.72  | 0.531 |
| 1431481_at   | RIKEN cDNA 4930443O20 gene                                              | 4930443O20Rik            | 3.29  | 0.301 | 1.2   | 0.825 | 1.56  | 0.988 | -2.41 | 0.045 | 1.5   | 0.467 |
| 1451614_a_at | amelogenin X chromosome                                                 | Amelx                    | -1.95 | 0.042 | -1.51 | 0.167 | -1.17 | 0.509 | -2.41 | 0.014 | 1.6   | 0.954 |
| 1441739_at   | Early B-cell factor 4                                                   | Ebf4                     | -1.02 | 0.770 | 1.45  | 0.399 | 1.08  | 0.685 | -2.41 | 0.007 | -1.1  | 0.660 |
| 1417730_at   | exostoses (multiple) 1                                                  | Ext1                     | 1.33  | 0.686 | -1.75 | 0.098 | -2.36 | 0.002 | -2.41 | 0.001 | -2.41 | 0.013 |
| 1428807_at   | RIKEN cDNA 4932702K14 gene                                              | 4932702K14Rik            | 2.36  | 0.168 | 3.14  | 0.066 | 1.39  | 0.659 | -2.39 | 0.032 | 1.15  | 0.942 |
| 1459114_at   | Ankyrin repeat and SAM domain containing 1                              | Anks1                    | 1.04  | 0.572 | 1.6   | 0.758 | -1.58 | 0.238 | -2.38 | 0.018 | 1.62  | 0.755 |
| 1433317_at   | RIKEN cDNA 4930477O15 gene                                              | 4930477O15Rik            | 3.1   | 0.663 | 2.11  | 0.827 | -1.91 | 0.069 | -2.37 | 0.010 | 2.01  | 0.088 |
| 1444285_at   | Mortality factor 4 like 1                                               | Morf4l1                  | -1.08 | 0.628 | -1.54 | 0.003 | -1.91 | 0.096 | -2.37 | 0.016 | -2.07 | 0.062 |
| 1446701_at   | ATP-binding cassette, sub-family B (MDR/TAP), member 1B                 | Abcb1b                   | 2.11  | 0.134 | 1.59  | 0.255 | 1.98  | 0.137 | -2.36 | 0.044 | 1.22  | 0.780 |
| 1447287_at   | expressed sequence C77137                                               | C77137                   | 2.01  | 0.905 | 3.69  | 0.216 | -1.27 | 0.290 | -2.36 | 0.038 | 1.88  | 0.935 |
| 1420439_at   | testis specific X-linked gene                                           | Tsx                      | -1.02 | 0.911 | -1.4  | 0.198 | 1.21  | 0.889 | -2.36 | 0.014 | -1.09 | 0.344 |
| 1460318_at   | cysteine and glycine-rich protein 3                                     | Csrp3                    | 1.19  | 0.386 | 1.23  | 0.603 | -1.12 | 0.349 | -2.35 | 0.037 | 1.89  | 0.235 |
| 1419793_at   | DNA segment, Chr 5, ERATO Doi 615, expressed                            | D5Ert615e                | -1.13 | 0.402 | 1.09  | 0.449 | 1.33  | 0.717 | -2.35 | 0.047 | 1.53  | 0.759 |
| 1449992_at   | protease, serine, 29                                                    | Prss29                   | 2.27  | 0.741 | 1.78  | 0.660 | 1.56  | 0.482 | -2.35 | 0.049 | 1.24  | 0.600 |
| 1432673_at   | RIKEN cDNA 2300010F08 gene                                              | 2300010F08Rik            | 1.16  | 0.715 | 1.36  | 0.578 | 1.11  | 0.807 | -2.34 | 0.048 | 1.57  | 0.598 |
| 1432401_a_at | RIKEN cDNA 4930511M11 gene                                              | 4930511M11Rik            | 2.31  | 0.338 | 1.47  | 0.545 | 1.86  | 0.820 | -2.34 | 0.049 | 1.5   | 0.635 |
| 1417388_at   | brain expressed X-linked 2                                              | Bex2                     | 1.24  | 0.736 | 1.1   | 0.557 | 2.3   | 0.233 | -2.34 | 0.024 | -1.25 | 0.334 |
| 1428459_at   | PRAME family member 12                                                  | Pramef12                 | 1.48  | 0.852 | -1.37 | 0.207 | 1.73  | 0.973 | -2.34 | 0.024 | 1.42  | 0.225 |
| 1421168_at   | ATP-binding cassette, sub-family G (WHITE), member 3                    | Abcg3                    | -1.49 | 0.149 | 1.31  | 0.446 | -1.02 | 0.874 | -2.32 | 0.026 | -1.19 | 0.370 |
| 1445224_at   | Adaptor-related protein complex 3, beta 2 subunit                       | Ap3b2                    | 2.25  | 0.320 | 3.09  | 0.066 | 1.27  | 0.887 | -2.32 | 0.040 | -1.3  | 0.367 |
| 1424234_s_at | mesenchyme homeobox 2                                                   | Meox2                    | -1.26 | 0.300 | -2.02 | 0.059 | 2.18  | 0.331 | -2.32 | 0.034 | 1.71  | 0.974 |
| 1446962_at   | ATP-binding cassette, sub-family D (ALD), member 2                      | Abcd2                    | 1.04  | 0.613 | -1    | 0.448 | 1.02  | 0.683 | -2.31 | 0.039 | -1.65 | 0.190 |
| 1460313_at   | olfactory receptor 2                                                    | Olfir2                   | 1.04  | 0.649 | -1.19 | 0.277 | 1.05  | 0.609 | -2.31 | 0.003 | 2.53  | 0.037 |
| 1456074_at   | orphan short chain dehydrogenase/reductase                              | Sdro                     | 1.01  | 0.830 | 1.86  | 0.224 | 2.56  | 0.280 | -2.31 | 0.032 | 1.87  | 0.612 |
| 1430567_at   | serine peptidase inhibitor, Kazal type 5                                | Spink5                   | 1.59  | 0.691 | 1.31  | 0.650 | 2.34  | 0.374 | -2.31 | 0.005 | 1.17  | 0.647 |
| 1439086_at   | RIKEN cDNA A930009L07 gene                                              | A930009L07Rik            | 1.1   | 0.461 | 2.15  | 0.260 | 1.48  | 0.851 | -2.3  | 0.029 | 1.35  | 0.786 |
| 1434785_at   | calcium channel, voltage-dependent, gamma subunit 5                     | Cacng5                   | -1.05 | 0.484 | -1.76 | 0.119 | -1.24 | 0.250 | -2.3  | 0.041 | -1.17 | 0.470 |
| 1417795_at   | cell adhesion molecule with homology to L1CAM                           | Chl1                     | 1.76  | 0.387 | 1.44  | 0.867 | 2.75  | 0.006 | -2.3  | 0.044 | 1.14  | 0.846 |
| 1452333_at   | SWI/SNF related, matrix associated, actin dependent regulator of chrom: | Smarca2                  | 1.03  | 0.824 | 1.66  | 0.103 | 1.17  | 0.738 | -2.3  | 0.002 | 1.05  | 0.850 |
| 1420020_at   | suppressor of zeste 12 homolog (Drosophila)                             | Suz12                    | 1.18  | 0.839 | 2.74  | 0.015 | 1.49  | 0.087 | -2.29 | 0.023 | 1.84  | 0.416 |
| 1447604_at   | cDNA sequence BC053393                                                  | BC053393                 | 1.19  | 0.595 | 1.11  | 0.559 | 1.01  | 0.940 | -2.28 | 0.045 | -1.21 | 0.399 |
| 1457232_at   | F-box and leucine-rich repeat protein 21                                | Fbxl21                   | 1.38  | 0.744 | 1.08  | 0.565 | 1.35  | 0.849 | -2.28 | 0.020 | -1.41 | 0.313 |
| 1453975_a_at | RIKEN cDNA 1700029M20 gene                                              | 1700029M20Rik            | 1.76  | 0.447 | 1.57  | 0.938 | -1.07 | 0.326 | -2.26 | 0.003 | 1.55  | 0.538 |
| 1455979_at   | AT rich interactive domain 1B (Swi1 like)                               | Arid1b                   | -1.36 | 0.229 | -3.04 | 0.030 | -1.49 | 0.017 | -2.25 | 0.001 | -2.03 | 0.009 |

|              |                                                                              |                    |       |       |       |       |       |       |       |       |       |       |
|--------------|------------------------------------------------------------------------------|--------------------|-------|-------|-------|-------|-------|-------|-------|-------|-------|-------|
| 1430797_at   | exportin 4                                                                   | Xpo4               | 2.2   | 0.140 | 2.54  | 0.014 | 1.4   | 0.823 | -2.25 | 0.028 | -1.59 | 0.048 |
| 1452860_at   | F-box and leucine-rich repeat protein 17                                     | Fbxl17             | -1.28 | 0.074 | -4.57 | 0.011 | -1.87 | 0.000 | -2.24 | 0.002 | -2.52 | 0.000 |
| 1456220_at   | F-box and leucine-rich repeat protein 7                                      | Fbxl7              | 1     | 0.539 | -6.34 | 0.021 | -1.82 | 0.043 | -2.23 | 0.000 | -2.13 | 0.005 |
| 1438590_at   | Rap guanine nucleotide exchange factor (GEF) 3                               | Rapgef3            | -1.06 | 0.687 | 1.47  | 0.909 | -1.47 | 0.078 | -2.23 | 0.028 | 1.36  | 0.877 |
| 1424007_at   | growth differentiation factor 10                                             | Gdf10              | 1.38  | 0.727 | 1.46  | 0.048 | 1.35  | 0.433 | -2.22 | 0.010 | 1.78  | 0.673 |
| 1432785_at   | RIKEN cDNA A930028O11 gene                                                   | A930028O11Rik      | 1.78  | 0.812 | 1.44  | 0.731 | 1.16  | 0.960 | -2.21 | 0.043 | -2.3  | 0.054 |
| 1436047_at   | gene model 672, (NCBI)                                                       | Gm672              | -1.12 | 0.226 | -2.63 | 0.015 | -1.69 | 0.000 | -2.21 | 0.001 | -2.44 | 0.000 |
| 1423363_at   | sortilin 1                                                                   | Sort1              | 1.43  | 0.432 | 1.35  | 0.791 | 2.12  | 0.062 | -2.21 | 0.032 | 1.05  | 0.830 |
| 1444029_at   | poly (ADP-ribose) polymerase family, member 11                               | Parp11             | 1.97  | 0.095 | 1.09  | 0.831 | 3.54  | 0.018 | -2.2  | 0.035 | -1.28 | 0.355 |
| 1433076_at   | RIKEN cDNA 5430402O13 gene                                                   | 5430402O13Rik      | -1.03 | 0.496 | -1.39 | 0.279 | 2.58  | 0.090 | -2.19 | 0.003 | 1.54  | 0.226 |
| 1455230_at   | calcium channel, voltage-dependent, gamma subunit 4                          | Cacng4             | 1.15  | 0.852 | -1.02 | 0.522 | 1.1   | 0.262 | -2.19 | 0.011 | 1.22  | 0.469 |
| 1420437_at   | indoleamine-pyrrole 2,3 dioxygenase                                          | Indo               | 1.78  | 0.681 | -1.02 | 0.518 | -1.44 | 0.064 | -2.19 | 0.030 | 1.6   | 0.630 |
| 1449314_at   | zinc finger protein, multitype 2                                             | Zfpm2              | -1.07 | 0.482 | -8.16 | 0.005 | -2.11 | 0.007 | -2.19 | 0.002 | -2.66 | 0.026 |
| 1459998_at   | zinc finger protein 407                                                      | Zfp407             | 1.05  | 0.681 | -3.13 | 0.001 | -1.74 | 0.002 | -2.18 | 0.004 | -2.23 | 0.012 |
| 1443624_at   | CDNA sequence BC013481                                                       | BC013481           | 1.62  | 0.973 | 1.83  | 0.900 | -1.08 | 0.292 | -2.17 | 0.013 | 1.22  | 0.887 |
| 1437312_at   | bone morphogenetic protein receptor, type 1B                                 | Bmpr1b             | 1.56  | 0.907 | -4.36 | 0.038 | -1.48 | 0.160 | -2.17 | 0.001 | -1.75 | 0.017 |
| 1436515_at   | RIKEN cDNA E030004N02 gene                                                   | E030004N02Rik      | -1.01 | 0.682 | -5.74 | 0.001 | -1.46 | 0.218 | -2.17 | 0.026 | -2.54 | 0.032 |
| 1430341_at   | nudix (nucleoside diphosphate linked moiety X)-type motif 5                  | Nudt5              | 2.53  | 0.057 | 1.9   | 0.625 | 2.65  | 0.926 | -2.17 | 0.038 | -1.22 | 0.553 |
| 1416702_at   | serine (or cysteine) peptidase inhibitor, clade I, member 1                  | Serpini1           | 1.57  | 0.696 | 1.08  | 0.790 | 2.16  | 0.518 | -2.17 | 0.014 | -1.2  | 0.295 |
| 1456868_at   | RIKEN cDNA 2900073G15 gene                                                   | 2900073G15Rik      | -2.28 | 0.031 | -1.12 | 0.494 | -1.09 | 0.671 | -2.16 | 0.018 | -1.34 | 0.157 |
| 1454353_at   | RIKEN cDNA 4833420D23 gene                                                   | 4833420D23Rik      | 1.03  | 0.744 | 1.75  | 0.296 | 1.29  | 0.927 | -2.16 | 0.024 | -1.47 | 0.215 |
| 1441014_at   | Alpha thalassemia/mental retardation syndrome X-linked homolog (hum          | Atrx               | -1.39 | 0.284 | -1.01 | 0.485 | 1.03  | 0.699 | -2.16 | 0.010 | -1.1  | 0.284 |
| 1456496_at   | Death-associated kinase 3                                                    | Dapk3              | 1.43  | 0.813 | -1.1  | 0.980 | -1.08 | 0.425 | -2.15 | 0.028 | 1.19  | 0.711 |
| 1454193_at   | RIKEN cDNA 5430401H09 gene                                                   | 5430401H09Rik      | 1.28  | 0.745 | 1.12  | 0.564 | -1.1  | 0.517 | -2.14 | 0.021 | 1.92  | 0.100 |
| 1459337_at   | asparagine-linked glycosylation 6 homolog (yeast, alpha-1,3,-glucosyltra     | Alg6               | -2.01 | 0.091 | -1.11 | 0.643 | 1.79  | 0.114 | -2.13 | 0.016 | 1.94  | 0.270 |
| 1454372_at   | CD80 antigen                                                                 | Cd80               | 2.13  | 0.191 | 2.45  | 0.531 | -1.02 | 0.945 | -2.13 | 0.016 | 1.82  | 0.420 |
| 1455540_at   | carbamoyl-phosphate synthetase 1                                             | Cps1               | -1.82 | 0.026 | -2.72 | 0.068 | 1.27  | 0.432 | -2.13 | 0.029 | 1.46  | 0.460 |
| 1450945_at   | protein kinase C, alpha                                                      | Prkca              | 1.16  | 0.926 | -2.39 | 0.042 | -2.09 | 0.001 | -2.13 | 0.001 | -2.58 | 0.005 |
| 1420352_at   | protease, serine, 22                                                         | Prss22             | 1.13  | 0.465 | 2.17  | 0.696 | -1.05 | 0.726 | -2.13 | 0.047 | 2.05  | 0.005 |
| 1437393_at   | expressed sequence AI875142                                                  | AI875142           | -1.31 | 0.125 | -3.91 | 0.004 | -2.18 | 0.001 | -2.12 | 0.006 | -2.46 | 0.005 |
| 1447114_x_at | RIKEN cDNA 4930414L22 gene                                                   | 4930414L22Rik      | 1.22  | 0.516 | 1.9   | 0.241 | 2.91  | 0.724 | -2.11 | 0.001 | 1.78  | 0.173 |
| 1444000_at   | RIKEN cDNA B930059L03 gene                                                   | B930059L03Rik      | 1.24  | 0.662 | -2.19 | 0.083 | 1.44  | 0.894 | -2.11 | 0.005 | 1.57  | 0.744 |
| 1442279_at   | Enhancer of polycomb homolog 1 (Drosophila)                                  | Epc1               | 2.4   | 0.166 | -1.07 | 0.402 | 1.4   | 0.980 | -2.11 | 0.016 | 2.33  | 0.682 |
| 1444708_at   | transmembrane protein 29                                                     | Tmem29             | 1.07  | 0.531 | 1.68  | 0.709 | 2.6   | 0.117 | -2.11 | 0.020 | -1.04 | 0.661 |
| 1452783_at   | fibronectin type III domain containing 3B                                    | Fndc3b             | 1.16  | 0.796 | -1.44 | 0.119 | -2.16 | 0.005 | -2.1  | 0.000 | -2.71 | 0.002 |
| 1432930_at   | RIKEN cDNA 4930453O09 gene                                                   | 4930453O09Rik      | 1.94  | 0.876 | 2.66  | 0.846 | 1.46  | 0.891 | -2.09 | 0.020 | 2.4   | 0.039 |
| 1451147_x_at | cold shock domain containing C2, RNA binding                                 | Csdc2              | -1.37 | 0.258 | 1.64  | 0.706 | 1.36  | 0.816 | -2.09 | 0.018 | 1.08  | 0.627 |
| 1430251_at   | RIKEN cDNA D330022H12 gene                                                   | D330022H12Rik      | -2.06 | 0.013 | -1.29 | 0.352 | 1.28  | 0.429 | -2.09 | 0.022 | -1.61 | 0.192 |
| 1420785_at   | growth factor receptor bound protein 2-associated protein 2                  | Gab2               | 1.41  | 0.237 | 1.13  | 0.899 | -1.16 | 0.320 | -2.09 | 0.017 | 1.28  | 0.506 |
| 1430484_at   | RIKEN cDNA 8430428J23 gene                                                   | 8430428J23Rik      | 2.75  | 0.137 | 1.54  | 0.467 | 3.01  | 0.559 | -2.08 | 0.000 | -1.09 | 0.327 |
| 1449290_at   | dihydropyrimidinase-like 5                                                   | Dpysl5             | 2.63  | 0.239 | 2.49  | 0.404 | 1.62  | 0.421 | -2.08 | 0.036 | -1.52 | 0.135 |
| 1442919_at   | SH3 and PX domains 2B                                                        | Sh3pxd2b           | 1.94  | 0.071 | -1.18 | 0.365 | 1.55  | 0.613 | -2.08 | 0.043 | -1.36 | 0.361 |
| 1447931_at   | Wolf-Hirschhorn syndrome candidate 1-like 1 (human)                          | Whsc1l1            | 1.1   | 0.135 | -1.11 | 0.413 | -1.74 | 0.016 | -2.08 | 0.001 | -1.91 | 0.002 |
| 1452343_at   | DNA segment, Chr 18, ERATO Doi 653, expressed                                | D18Ert653e         | 1.21  | 0.888 | -1.57 | 0.124 | -1.75 | 0.006 | -2.07 | 0.045 | -2.18 | 0.002 |
| 1435078_at   | tetratricopeptide repeat, ankyrin repeat and coiled-coil containing 2        | Tanc2              | -1.36 | 0.114 | -5.07 | 0.015 | -1.43 | 0.071 | -2.07 | 0.001 | -2.12 | 0.002 |
| 1434571_at   | vacuolar protein sorting 13B (yeast) /// similar to vacuolar protein sorting | Vps13b /// LOC6661 | -1.03 | 0.556 | -2.27 | 0.040 | -1.87 | 0.009 | -2.07 | 0.001 | -2.24 | 0.019 |
| 1446313_at   | zinc finger protein 30                                                       | Zfp30              | 1.53  | 0.692 | 1.96  | 0.897 | -1.71 | 0.187 | -2.07 | 0.039 | 1.17  | 0.971 |
| 1435059_at   | development and differentiation enhancing                                    | Ddef1              | 1.19  | 0.970 | -1.45 | 0.158 | -2.13 | 0.001 | -2.07 | 0.003 | -2.64 | 0.001 |
| 1419438_at   | single-minded homolog 2 (Drosophila)                                         | Sim2               | -1.05 | 0.984 | 2.04  | 0.563 | -1.79 | 0.065 | -2.06 | 0.025 | 1.84  | 0.571 |
| 1429417_at   | RIKEN cDNA 4833446K15 gene                                                   | 4833446K15Rik      | -1.34 | 0.062 | -4.38 | 0.016 | -1.62 | 0.080 | -2.05 | 0.003 | -2.67 | 0.001 |
| 1457690_at   | kalirin, RhoGEF kinase                                                       | Kalrn              | 1     | 0.723 | -1.57 | 0.241 | -1.58 | 0.132 | -2.05 | 0.025 | 1.1   | 0.327 |
| 1428509_at   | myosin IE                                                                    | Myo1e              | 1.14  | 0.661 | -2.21 | 0.027 | -1.76 | 0.006 | -2.05 | 0.009 | -2.04 | 0.005 |
| 1425288_at   | sterile alpha motif domain containing 11                                     | Samd11             | -1.03 | 0.372 | 2.33  | 0.651 | -1.04 | 0.536 | -2.05 | 0.020 | 1.69  | 0.311 |
| 1440159_at   | RIKEN cDNA 1700010B09 gene                                                   | 1700010B09Rik      | -1.03 | 0.972 | -1.22 | 0.466 | 1.26  | 0.595 | -2.04 | 0.007 | -1.04 | 0.624 |
| 1434639_at   | kelch repeat and BTB (POZ) domain containing 9                               | Kbtbd9             | -1.15 | 0.176 | -6.56 | 0.031 | -1.84 | 0.006 | -2.04 | 0.010 | -1.98 | 0.107 |
| 1422974_at   | 5' nucleotidase, ecto                                                        | Nt5e               | 1.5   | 0.676 | 1.64  | 0.780 | 1.41  | 0.700 | -2.04 | 0.035 | 1.17  | 0.774 |
| 1442451_at   | Tetratricopeptide repeat domain 15                                           | Ttc15              | 1.7   | 0.363 | -1.52 | 0.090 | -1.56 | 0.141 | -2.04 | 0.036 | 1.24  | 0.709 |
| 1417798_at   | RIKEN cDNA 1810019J16 gene                                                   | 1810019J16Rik      | -2.19 | 0.057 | -1.19 | 0.457 | -1.05 | 0.463 | -2.03 | 0.001 | -1.5  | 0.100 |



|              |                                                                                     |               |       |       |       |       |       |       |       |       |       |       |
|--------------|-------------------------------------------------------------------------------------|---------------|-------|-------|-------|-------|-------|-------|-------|-------|-------|-------|
| 1423269_a_at | neural precursor cell expressed, developmentally down-regulated gene 4              | Nedd4l        | 1.26  | 0.879 | -2.06 | 0.051 | -1.92 | 0.005 | -2.03 | 0.000 | -2.21 | 0.003 |
| 1455204_at   | phosphatidylinositol transfer protein, cytoplasmic 1                                | Pitpnc1       | -1.07 | 0.436 | -3.71 | 0.010 | -1.77 | 0.040 | -2.02 | 0.012 | -2.17 | 0.007 |
| 1422711_a_at | pregnancy upregulated non-ubiquitously expressed CaM kinase                         | Pnck          | -1.17 | 0.413 | -1.35 | 0.343 | 1.69  | 0.279 | -2.02 | 0.012 | 1.33  | 0.585 |
| 1440065_at   | Polymerase (RNA) II (DNA directed) polypeptide J                                    | Polr2j        | 1.65  | 0.707 | -1.13 | 0.328 | 1.96  | 0.711 | -2.02 | 0.025 | -1.06 | 0.838 |
| 1430351_at   | spermatogenesis associated 18                                                       | Spta18        | 1.43  | 0.487 | 1.52  | 0.552 | -1.65 | 0.047 | -2.02 | 0.028 | 1.21  | 0.771 |
| 1457154_at   | Membrane-associated ring finger (C3HC4) 6                                           | 6-Mar         | -1.02 | 0.406 | 1.12  | 0.465 | 1     | 0.751 | -2.01 | 0.007 | 1.15  | 0.229 |
| 1454500_at   | RIKEN cDNA 6330419E04 gene                                                          | 6330419E04Rik | -1.33 | 0.279 | -1.27 | 0.313 | 1.12  | 0.407 | -2.01 | 0.044 | 2.78  | 0.070 |
| 1442645_at   | ATPase, Ca++ transporting, plasma membrane 3                                        | Atp2b3        | -1.33 | 0.248 | 1.07  | 0.810 | -1.04 | 0.512 | -2.01 | 0.004 | 1.1   | 0.675 |
| 1443157_at   | GLIS family zinc finger 3                                                           | Glis3         | 1.67  | 0.344 | 1.32  | 0.410 | 1.03  | 0.940 | -2.01 | 0.003 | 1.18  | 0.194 |
| 1456560_at   | gene model 93, (NCBI)                                                               | Gm93          | 1.83  | 0.516 | 2.07  | 0.474 | -2.38 | 0.035 | -2.01 | 0.032 | 3.14  | 0.379 |
| 1437293_x_at | uronyl-2-sulfotransferase                                                           | Ust           | 2.3   | 0.302 | 1.22  | 0.866 | -1.49 | 0.183 | -2.01 | 0.048 | -1.3  | 0.302 |
| 1433167_at   | RIKEN cDNA 4930444E06 gene                                                          | 4930444E06Rik | 1.22  | 0.549 | 1.44  | 0.836 | 1.19  | 0.726 | -2    | 0.015 | 1.29  | 0.997 |
| 1439670_at   | RIKEN cDNA B020006M18 gene                                                          | B020006M18Rik | 1.34  | 0.663 | 1.57  | 0.156 | 1.41  | 0.437 | -2    | 0.031 | -1.04 | 0.529 |
| 1428051_a_at | calcium channel, voltage-dependent, L type, alpha 1D subunit                        | Cacna1d       | -1.05 | 0.543 | 1.01  | 0.757 | -1.25 | 0.306 | -2    | 0.011 | 1.27  | 0.173 |
| 1437989_at   | phosphodiesterase 8B                                                                | Pde8b         | 2.05  | 0.471 | 1.65  | 0.485 | -1.09 | 0.682 | -2    | 0.041 | -1.04 | 0.823 |
| 1432152_at   | RIKEN cDNA 2610109H07 gene                                                          | 2610109H07Rik | 1.71  | 0.613 | 2.32  | 0.097 | 1.17  | 0.500 | -1.99 | 0.037 | -1.59 | 0.162 |
| 1460006_at   | AT motif binding factor 1                                                           | Atbf1         | -1.14 | 0.107 | -1.9  | 0.002 | -1.76 | 0.002 | -1.99 | 0.000 | -2.15 | 0.002 |
| 1440293_at   | RIKEN cDNA C230081A13 gene                                                          | C230081A13Rik | 1.77  | 0.841 | 1.54  | 0.866 | -1.45 | 1.190 | -1.99 | 0.030 | -1.68 | 0.072 |
| 1456022_at   | homeodomain interacting protein kinase 2                                            | Hipk2         | 1.01  | 0.934 | -1.81 | 0.048 | -1.76 | 0.024 | -1.99 | 0.001 | -2.01 | 0.024 |
| 1457632_s_at | myeloid ecotropic viral integration site-related gene 1                             | Mrg1          | -1.46 | 0.281 | -3.35 | 0.131 | -1.42 | 0.028 | -1.99 | 0.015 | -1.54 | 0.006 |
| 1453679_at   | RIKEN cDNA 1700100I10 gene                                                          | 1700100I10Rik | -1.28 | 0.255 | 1.48  | 0.902 | 1.82  | 0.789 | -1.98 | 0.034 | 1.16  | 0.323 |
| 1432920_at   | RIKEN cDNA 5330421C15 gene                                                          | 5330421C15Rik | -1.58 | 0.145 | -1.01 | 0.488 | -1.13 | 0.424 | -1.98 | 0.007 | -1.91 | 0.076 |
| 1453580_at   | RIKEN cDNA 5630401D24 gene                                                          | 5630401D24Rik | -1.22 | 0.341 | -1.1  | 0.456 | 1.28  | 0.611 | -1.98 | 0.019 | 1.4   | 0.247 |
| 1440352_at   | region containing RIKEN cDNA 1700028E10 gene; hypothetical protein                  | LOC625175     | 1.68  | 0.781 | 1.6   | 0.981 | -1.3  | 0.243 | -1.98 | 0.005 | 3.2   | 0.022 |
| 1454706_at   | UV radiation resistance associated gene                                             | Uvrug         | -1.04 | 0.271 | -1.95 | 0.005 | -1.53 | 0.005 | -1.98 | 0.004 | -1.73 | 0.000 |
| 1430400_at   | RIKEN cDNA 4930521A18 gene                                                          | 4930521A18Rik | 1.44  | 0.994 | -2.51 | 0.128 | 1.03  | 0.497 | -1.97 | 0.028 | 2.09  | 0.296 |
| 144544_a_at  | potassium voltage-gated channel, subfamily H (eag-related), member 2                | Kcnh2         | 2.22  | 0.609 | -1.02 | 0.744 | -1.12 | 0.519 | -1.97 | 0.044 | -1.4  | 0.235 |
| 1436938_at   | RNA binding motif, single stranded interacting protein                              | Rbms3         | -1.51 | 0.261 | -4.05 | 0.115 | -2.3  | 0.013 | -1.97 | 0.023 | -2.67 | 0.026 |
| 1435389_at   | RALBP1 associated Eps domain containing protein 2                                   | Reps2         | 1.98  | 0.949 | -1.22 | 0.400 | -1.12 | 0.445 | -1.97 | 0.045 | 1.16  | 0.879 |
| 1457156_at   | TRH-degrading enzyme                                                                | Trhde         | 2.38  | 0.165 | 3.66  | 0.111 | 1.57  | 0.980 | -1.97 | 0.049 | -1.47 | 0.275 |
| 1445607_at   | RIKEN cDNA 4833418A01 gene                                                          | 4833418A01Rik | -1.34 | 0.174 | 1.62  | 0.443 | -1.04 | 0.960 | -1.96 | 0.011 | 1.44  | 0.941 |
| 1434683_at   | Cut-like 1 (Drosophila)                                                             | Cut1          | -1.14 | 0.164 | -2.09 | 0.007 | -1.75 | 0.004 | -1.96 | 0.003 | -2.06 | 0.003 |
| 1451279_at   | ELKS/RAB6-interacting/CAST family member 1                                          | Erc1          | -1.21 | 0.161 | -2.67 | 0.006 | -1.54 | 0.012 | -1.96 | 0.011 | -2.03 | 0.004 |
| 1441450_s_at | jumonji, AT rich interactive domain 1C (Rbp2 like)                                  | Jarid1c       | 1.99  | 0.238 | 1.85  | 0.837 | 1.11  | 0.997 | -1.96 | 0.040 | 1.41  | 0.895 |
| 1451804_a_at | leucine rich repeat containing 16                                                   | Lrrc16        | 1     | 0.759 | -3.49 | 0.004 | -1.37 | 0.018 | -1.96 | 0.005 | -1.71 | 0.014 |
| 1436765_at   | par-3 (partitioning defective 3) homolog (C. elegans)                               | Pard3         | 3.12  | 0.674 | -1.6  | 0.101 | -1.75 | 0.064 | -1.96 | 0.006 | -3.48 | 0.003 |
| 1438671_at   | protein phosphatase 2 (formerly 2A), regulatory subunit B (PR 52), gamn             | Ppp2r2c       | 1.11  | 0.844 | -1.02 | 0.568 | -1.38 | 0.089 | -1.96 | 0.018 | 1.17  | 0.731 |
| 1451236_at   | RAS-like, estrogen-regulated, growth-inhibitor                                      | Rerg          | 1.06  | 0.977 | -2.56 | 0.017 | -1.41 | 0.126 | -1.96 | 0.008 | -1.55 | 0.087 |
| 1451998_at   | taspase, threonine aspartase 1                                                      | Tasp1         | -1.23 | 0.307 | -2.72 | 0.119 | -1.23 | 0.310 | -1.96 | 0.007 | -1.99 | 0.079 |
| 1456493_at   | RIKEN cDNA 5031415C07 gene /// RIKEN cDNA 5830484A20 gene /// s 5031415C07Rik /// t |               | -2.01 | 0.083 | -1.17 | 0.327 | 1.32  | 0.950 | -1.95 | 0.005 | 1.29  | 0.187 |
| 1453673_at   | ATPase type 13A4                                                                    | Atp13a4       | 1.54  | 0.582 | 1.53  | 0.249 | -1.25 | 0.359 | -1.95 | 0.020 | -1.11 | 0.756 |
| 1445307_at   | Autism susceptibility candidate 2                                                   | Aut52         | 1.66  | 0.531 | 1.91  | 0.467 | 1.12  | 0.715 | -1.95 | 0.037 | -1.95 | 0.058 |
| 1434769_at   | BTB (POZ) domain containing 9                                                       | Btb9          | -1.34 | 0.267 | -2.53 | 0.139 | -1.32 | 0.049 | -1.95 | 0.022 | -1.67 | 0.034 |
| 1444706_at   | RIKEN cDNA E430014L09 gene                                                          | E430014L09Rik | 1.18  | 0.846 | -1.03 | 0.542 | -1.34 | 0.269 | -1.95 | 0.047 | -1.43 | 0.049 |
| 1449978_at   | zinc finger protein 2, Y linked                                                     | Zfy2          | 1.67  | 0.996 | -1.19 | 0.222 | -1.31 | 0.330 | -1.95 | 0.031 | -1.21 | 0.141 |
| 1430106_at   | RIKEN cDNA 1700126L10 gene                                                          | 1700126L10Rik | 1.72  | 0.744 | 1.23  | 0.514 | 2.16  | 0.632 | -1.94 | 0.022 | 1.66  | 0.377 |
| 1453707_at   | RIKEN cDNA 4930480G23 gene                                                          | 4930480G23Rik | -1.05 | 0.667 | -1.92 | 0.044 | 1.16  | 0.567 | -1.94 | 0.047 | 2.04  | 0.291 |
| 1445111_at   | Exocyst complex component 4                                                         | Exoc4         | 1.17  | 0.601 | 1.68  | 0.232 | 1.1   | 0.847 | -1.94 | 0.045 | -3.64 | 0.045 |
| 1460490_at   | mitochondrial ribosomal protein L15                                                 | Mrp15         | 1.93  | 0.420 | 1.72  | 0.186 | -1.75 | 0.046 | -1.94 | 0.025 | -1.44 | 0.193 |
| 1418420_at   | myogenic differentiation 1                                                          | Myod1         | 1.18  | 0.224 | -1.62 | 0.010 | 1.21  | 0.936 | -1.94 | 0.007 | 1.26  | 0.472 |
| 1458121_at   | RIKEN cDNA A430107O13 gene                                                          | A430107O13Rik | 1.97  | 0.234 | 2.44  | 0.012 | 1.29  | 0.107 | -1.93 | 0.033 | -1.13 | 0.541 |
| 1434880_at   | ets variant gene 6 (TEL oncogene)                                                   | Etv6          | 1.08  | 0.579 | -1.4  | 0.093 | -1.66 | 0.003 | -1.93 | 0.003 | -2.34 | 0.001 |
| 1449199_at   | mucin 1, transmembrane                                                              | Muc1          | 1.41  | 0.288 | 1.13  | 0.612 | 1.11  | 0.983 | -1.93 | 0.012 | 1.03  | 0.806 |
| 1422592_at   | catenin (cadherin associated protein), delta 2                                      | Ctnnd2        | -1.53 | 0.118 | -1.97 | 0.134 | -1.45 | 0.128 | -1.92 | 0.004 | -1.4  | 0.086 |
| 1448765_at   | Fyn proto-oncogene                                                                  | Fyn           | -1.15 | 0.180 | -2.22 | 0.004 | -1.66 | 0.007 | -1.92 | 0.000 | -2.1  | 0.002 |
| 1422991_at   | phosphatidylinositol 3-kinase catalytic delta polypeptide                           | Pik3cd        | 1.1   | 0.658 | -1.02 | 0.517 | 1.08  | 0.588 | -1.92 | 0.013 | 1.11  | 0.510 |
| 1434804_at   | SEC15-like 2 (S. cerevisiae)                                                        | Sec15l2       | -1.23 | 0.223 | -3.11 | 0.051 | -1.76 | 0.009 | -1.92 | 0.002 | -2.06 | 0.002 |
| 1458171_at   | solute carrier organic anion transporter family, member 2b1                         | Slc02b1       | 1.12  | 0.804 | 1.27  | 0.569 | -1.25 | 0.023 | -1.92 | 0.031 | -1.07 | 0.562 |

|              |                                                                                           |                     |       |       |       |       |       |       |       |       |       |       |
|--------------|-------------------------------------------------------------------------------------------|---------------------|-------|-------|-------|-------|-------|-------|-------|-------|-------|-------|
| 1424588_at   | SLIT-ROBO Rho GTPase activating protein 3                                                 | Srgap3              | -1.21 | 0.287 | -3.26 | 0.022 | -1.62 | 0.011 | -1.92 | 0.002 | -2.04 | 0.022 |
| 1448973_at   | sulfotransferase family 1D, member 1                                                      | Sult1d1             | 1.64  | 0.332 | 1.36  | 0.397 | 1.84  | 0.087 | -1.92 | 0.047 | 1.05  | 0.387 |
| 1449520_at   | tetratricopeptide repeat domain 28                                                        | Ttc28               | -1.28 | 0.065 | -2.61 | 0.020 | -1.74 | 0.010 | -1.92 | 0.002 | -2.11 | 0.036 |
| 1443783_x_at | Histocompatibility 2, class II antigen A, alpha                                           | H2-Aa               | -1.35 | 0.083 | 2.02  | 0.653 | 1.58  | 0.910 | -1.91 | 0.000 | 1.56  | 0.501 |
| 1449351_s_at | platelet-derived growth factor, C polypeptide                                             | Pdgfc               | 1.07  | 0.742 | -1.92 | 0.015 | -1.75 | 0.012 | -1.91 | 0.007 | -1.86 | 0.000 |
| 1458363_at   | zinc finger, DHHC domain containing 17                                                    | Zdhhc17             | 1.93  | 0.290 | 1.1   | 0.952 | 1.4   | 0.363 | -1.91 | 0.032 | -1.99 | 0.111 |
| 1457879_at   | RIKEN cDNA A230107O07 gene                                                                | A230107O07Rik       | 1.03  | 0.652 | 1.31  | 0.929 | 1.83  | 0.847 | -1.9  | 0.022 | 1.34  | 0.686 |
| 1455358_at   | Ataxin 2 binding protein 1                                                                | A2bp1               | 1.24  | 0.723 | -1.44 | 0.255 | -1.52 | 0.196 | -1.9  | 0.030 | -3.22 | 0.007 |
| 1426027_a_at | Rho GTPase activating protein 10                                                          | Arhgap10            | 4.61  | 0.736 | 1.98  | 0.336 | -1.54 | 0.114 | -1.9  | 0.000 | -2.56 | 0.012 |
| 1457465_at   | shroom family member 4                                                                    | Shroom4             | -1.04 | 0.665 | -1.26 | 0.060 | -1.34 | 0.060 | -1.9  | 0.003 | -1.52 | 0.012 |
| 1435930_at   | zinc finger protein 291                                                                   | Zfp291              | -1.82 | 0.225 | -3.26 | 0.140 | -1.53 | 0.005 | -1.9  | 0.019 | -2.27 | 0.016 |
| 1455427_at   | angiopoietin 4                                                                            | Angpt4              | -1.19 | 0.129 | -1.35 | 0.406 | 1.31  | 0.883 | -1.89 | 0.024 | 1.01  | 0.980 |
| 1429783_at   | PDZ and LIM domain 5                                                                      | Pdlim5              | -1.3  | 0.170 | -1.51 | 0.040 | -1.84 | 0.005 | -1.89 | 0.000 | -1.95 | 0.046 |
| 1432505_at   | RIKEN cDNA 1700009J07 gene                                                                | 1700009J07Rik       | -1.22 | 0.360 | -1.18 | 0.380 | -1.2  | 0.358 | -1.88 | 0.016 | 1.05  | 0.708 |
| 1433193_at   | RIKEN cDNA 4930433M22 gene                                                                | 4930433M22Rik       | -1.37 | 0.306 | -1.32 | 0.333 | 1.76  | 0.866 | -1.88 | 0.001 | 1.5   | 0.876 |
| 1439703_at   | CD200 receptor 1                                                                          | Cd200r1             | 1.26  | 0.802 | 1.2   | 0.739 | 1.36  | 0.975 | -1.88 | 0.044 | 1.41  | 0.229 |
| 1426994_at   | PH domain and leucine rich repeat protein phosphatase                                     | Phlpp               | 1.01  | 0.795 | -2.06 | 0.019 | -1.62 | 0.001 | -1.88 | 0.000 | -2.1  | 0.001 |
| 1444553_at   | Postmeiotic segregation increased 1 (S. cerevisiae)                                       | Pms1                | 1.27  | 0.415 | 1.24  | 0.319 | 1.4   | 0.760 | -1.88 | 0.011 | -1.43 | 0.022 |
| 1436910_at   | RAS protein activator like 2                                                              | Rasal2              | 1.04  | 0.327 | -2.91 | 0.008 | -1.78 | 0.017 | -1.88 | 0.001 | -1.98 | 0.002 |
| 1438332_at   | solute carrier family 22 (organic anion transporter), member 6                            | Slc22a6             | -1.53 | 0.279 | 1.04  | 0.642 | 2.61  | 0.216 | -1.88 | 0.012 | 1.86  | 0.768 |
| 1444412_at   | Absent in melanoma 1                                                                      | Aim1                | 1.19  | 0.939 | -1.96 | 0.096 | 1.57  | 0.596 | -1.87 | 0.005 | 2.82  | 0.206 |
| 1457790_at   | Ankyrin repeat and SOCS box-containing protein 3                                          | Asb3                | 1.08  | 0.759 | -3.48 | 0.023 | -1.25 | 0.109 | -1.87 | 0.024 | 1.11  | 0.627 |
| 1420560_at   | cholinergic receptor, nicotinic, epsilon polypeptide                                      | Chrne               | 1.53  | 0.443 | 1.58  | 0.919 | 2.14  | 0.475 | -1.87 | 0.004 | 1.15  | 0.316 |
| 1457685_at   | RIKEN cDNA D330034E10 gene                                                                | D330034E10Rik       | 1.33  | 0.907 | 1.03  | 0.907 | 1.05  | 0.979 | -1.87 | 0.014 | -1.49 | 0.303 |
| 1429841_at   | multiple EGF-like-domains 10                                                              | Megf10              | -1.66 | 0.022 | -2.13 | 0.020 | 1.22  | 0.769 | -1.87 | 0.023 | -1.41 | 0.127 |
| 1430612_at   | RIKEN cDNA 1810033B17 gene                                                                | 1810033B17Rik       | 1.6   | 0.681 | 1.81  | 0.919 | 1.43  | 0.249 | -1.86 | 0.029 | 1     | 0.865 |
| 1459515_at   | RIKEN cDNA 2610037D02 gene                                                                | 2610037D02Rik       | 2.8   | 0.256 | 2.18  | 0.256 | 2.8   | 0.82  | -1.86 | 0.015 | -1.13 | 0.228 |
| 1453613_at   | RIKEN cDNA A130006I12 gene                                                                | A130006I12Rik       | 2.07  | 0.757 | 1.62  | 0.331 | 1.17  | 0.949 | -1.86 | 0.030 | 1.51  | 0.637 |
| 1416846_a_at | PDZ domain containing RING finger 3                                                       | Pdzrn3              | 1.32  | 0.624 | -1.43 | 0.178 | -1.71 | 0.011 | -1.86 | 0.006 | -2.09 | 0.001 |
| 1445984_at   | PFTAIRE protein kinase 1                                                                  | Pftk1               | 1.7   | 0.228 | 2.44  | 0.540 | -2.56 | 0.029 | -1.86 | 0.033 | 2.49  | 0.956 |
| 1422541_at   | protein tyrosine phosphatase, receptor type, M                                            | Ptprm               | -1.47 | 0.055 | -3.24 | 0.022 | -1.9  | 0.005 | -1.86 | 0.004 | -2.27 | 0.004 |
| 1438055_at   | retinoic acid receptor responder (tazarotene induced) 1                                   | Rarres1             | -1.05 | 0.811 | -1.26 | 0.402 | 1.19  | 0.493 | -1.86 | 0.026 | 1.25  | 0.179 |
| 1455967_at   | sorbin and SH3 domain containing 1                                                        | Sorbs1              | 1.06  | 0.775 | -1.22 | 0.260 | -1.77 | 0.144 | -1.86 | 0.025 | -2.19 | 0.067 |
| 1432495_at   | SRY-box containing gene 7                                                                 | Sox7                | 1.92  | 0.994 | 2.24  | 0.419 | -2.08 | 0.138 | -1.86 | 0.019 | 1.77  | 0.384 |
| 1452714_at   | tetratricopeptide repeat, ankyrin repeat and coiled-coil containing 1                     | Tanc1               | 1.07  | 0.602 | -1.79 | 0.011 | -1.62 | 0.004 | -1.86 | 0.009 | -1.89 | 0.001 |
| 1442343_at   | Thioredoxin domain containing 11                                                          | Txndc11             | -1.09 | 0.400 | 2.34  | 0.399 | 1.73  | 0.160 | -1.86 | 0.014 | 3.7   | 0.198 |
| 1459785_at   | Zinc finger protein 383                                                                   | Zfp383              | 2.18  | 0.636 | 3.01  | 0.214 | 1.81  | 0.851 | -1.86 | 0.012 | -1.55 | 0.208 |
| 1455422_x_at | septin 4                                                                                  | 4-Sep               | 1.55  | 0.401 | -1.11 | 0.807 | 1.5   | 0.629 | -1.85 | 0.047 | -1.2  | 0.370 |
| 1431110_at   | RIKEN cDNA 5430431D22 gene                                                                | 5430431D22Rik       | -1.28 | 0.197 | -4.34 | 0.012 | -1.93 | 0.004 | -1.85 | 0.023 | -1.89 | 0.015 |
| 1451628_a_at | ankyrin 3, epithelial                                                                     | Ank3                | 1.05  | 0.758 | -1.36 | 0.208 | -1.86 | 0.004 | -1.84 | 0.016 | -1.36 | 0.128 |
| 1417318_at   | deleted in bladder cancer 1 (human)                                                       | Dbc1                | -1.37 | 0.141 | -3.6  | 0.020 | -1.99 | 0.004 | -1.84 | 0.008 | -2.43 | 0.006 |
| 1460662_at   | period homolog 3 (Drosophila)                                                             | Per3                | -1.3  | 0.403 | -1.47 | 0.243 | -1.09 | 0.436 | -1.84 | 0.016 | 1.48  | 0.747 |
| 1456816_at   | Retinoic acid induced 17                                                                  | Rai17               | -1.11 | 0.422 | 1.08  | 0.443 | 1.4   | 0.119 | -1.84 | 0.027 | -1.13 | 0.295 |
| 1450343_at   | vomerolnasal 1 receptor, D1                                                               | V1rd1               | 1.12  | 0.533 | 1.56  | 0.195 | 1.57  | 0.024 | -1.84 | 0.041 | 1.36  | 0.714 |
| 1439812_at   | RIKEN cDNA 4930402H24 gene                                                                | 4930402H24Rik       | -1.26 | 0.120 | 1.02  | 0.898 | 2.09  | 0.261 | -1.83 | 0.032 | -1.09 | 0.569 |
| 1451872_a_at | neuronalized-like homolog (Drosophila)                                                    | Neurl               | 1.36  | 0.249 | 1.73  | 0.898 | 1.61  | 0.807 | -1.83 | 0.014 | -1.29 | 0.280 |
| 1441708_at   | sperm associated antigen 16                                                               | Spag16              | 1.13  | 0.781 | -1.21 | 0.380 | 1.53  | 0.703 | -1.83 | 0.045 | 1.17  | 0.734 |
| 1454546_at   | RIKEN cDNA 4933403L11 gene                                                                | 4933403L11Rik       | 1.69  | 0.695 | 1.16  | 0.587 | -1.34 | 0.403 | -1.82 | 0.002 | -2.86 | 0.004 |
| 1429549_at   | procollagen, type XXVII, alpha 1                                                          | Col27a1             | 1.16  | 0.272 | -2.07 | 0.122 | -1.06 | 0.420 | -1.82 | 0.011 | 1.19  | 0.933 |
| 1443939_at   | similar to C05G5.5 /// similar to C05G5.5 /// similar to C05G5.5                          | LOC230628 /// LOC   | -1.29 | 0.188 | -2.16 | 0.065 | -1.58 | 0.014 | -1.82 | 0.008 | -1.21 | 0.201 |
| 1428517_at   | WD repeat and FYVE domain containing 3                                                    | Wdly3               | -1.13 | 0.058 | -1.62 | 0.025 | -1.23 | 0.120 | -1.82 | 0.006 | -1.91 | 0.002 |
| 1450182_at   | chloride channel Ka                                                                       | Clcnka              | -1.13 | 0.536 | -1.29 | 0.139 | 2.4   | 0.202 | -1.81 | 0.018 | -2.08 | 0.076 |
| 1456467_s_at | nemo like kinase                                                                          | Nlk                 | -1.47 | 0.310 | -1.65 | 0.264 | -1.37 | 0.054 | -1.81 | 0.002 | -1.36 | 0.087 |
| 1420784_at   | sodium channel, voltage-gated, type XI, alpha                                             | Scn11a              | 1.48  | 0.122 | -1.24 | 0.243 | 1.38  | 0.079 | -1.81 | 0.015 | 1.68  | 0.381 |
| 1441226_at   | spondin 1, (f-spondin) extracellular matrix protein                                       | Spon1               | -2.14 | 0.114 | -1.55 | 0.239 | 1.03  | 0.472 | -1.81 | 0.006 | -1.63 | 0.197 |
| 1450046_at   | transmembrane protein 59                                                                  | Tmem59              | -1.13 | 0.455 | 1.45  | 0.596 | 1.7   | 0.077 | -1.81 | 0.021 | -1.37 | 0.084 |
| 1428493_at   | RIKEN cDNA 2610511M17 gene /// similar to signal-induced proliferator 2610511M17Rik /// l | 2610511M17Rik /// l | -1.17 | 0.275 | -1.74 | 0.005 | -1.4  | 0.047 | -1.8  | 0.005 | -1.63 | 0.000 |
| 1447674_at   | RIKEN cDNA 2900080J11 gene                                                                | 2900080J11Rik       | 1.55  | 0.700 | 1.08  | 0.809 | -1.28 | 0.161 | -1.8  | 0.005 | 1.41  | 0.336 |

|              |                                                                        |                  |       |       |       |       |       |       |       |       |       |       |
|--------------|------------------------------------------------------------------------|------------------|-------|-------|-------|-------|-------|-------|-------|-------|-------|-------|
| 1454272_at   | RIKEN cDNA 9630015K15 gene                                             | 9630015K15Rik    | 2.5   | 0.334 | 1.23  | 0.755 | 1.4   | 0.673 | -1.8  | 0.036 | 2.64  | 0.120 |
| 1431953_at   | ATPase, aminophospholipid transporter-like, class I, type 8A, member 2 | Atp8a2           | -1.76 | 0.137 | -1.4  | 0.330 | -1.27 | 0.462 | -1.8  | 0.049 | 1.55  | 0.459 |
| 1449220_at   | GTPase, IMAP family member 3                                           | Gimap3           | -1.42 | 0.218 | -1.09 | 0.405 | -1.18 | 0.216 | -1.8  | 0.014 | 3.55  | 0.316 |
| 1430137_at   | mitogen-activated protein kinase kinase kinase 13                      | Map3k13          | -1.11 | 0.466 | 1.02  | 0.720 | 1.13  | 0.718 | -1.8  | 0.032 | -1.3  | 0.289 |
| 1452762_at   | RIKEN cDNA 8430436O14 gene                                             | 8430436O14Rik    | -1.6  | 0.141 | -3.44 | 0.061 | -2.18 | 0.007 | -1.79 | 0.002 | -2.17 | 0.036 |
| 1444401_at   | Expressed sequence C80913                                              | C80913           | -1.17 | 0.374 | 1.19  | 0.611 | 1.48  | 0.574 | -1.79 | 0.022 | 1.46  | 0.610 |
| 1426463_at   | gephyrin                                                               | Gphn             | -1.17 | 0.284 | -4.1  | 0.010 | -1.84 | 0.001 | -1.79 | 0.007 | -1.9  | 0.012 |
| 1435521_at   | Musashi homolog 2 (Drosophila)                                         | Msi2             | -1.34 | 0.215 | -2.68 | 0.004 | -1.28 | 0.126 | -1.79 | 0.023 | -1.34 | 0.097 |
| 1441836_x_at | RIKEN cDNA 1700006H03 gene                                             | 1700006H03Rik    | 1.3   | 0.357 | 1.76  | 0.238 | 1     | 0.688 | -1.78 | 0.040 | -1.03 | 0.727 |
| 1429598_at   | RIKEN cDNA 2310042D19 gene                                             | 2310042D19Rik    | -2.59 | 0.055 | -1.57 | 0.090 | 1.34  | 0.505 | -1.78 | 0.036 | 1.05  | 0.861 |
| 1430900_at   | RIKEN cDNA 4930430O22 gene                                             | 4930430O22Rik    | -1.1  | 0.403 | 1.21  | 0.966 | -1.09 | 0.527 | -1.78 | 0.000 | -1.65 | 0.074 |
| 1454056_at   | RIKEN cDNA 9030407P20 gene                                             | 9030407P20Rik    | 1.42  | 0.534 | 1.38  | 0.541 | -1.94 | 1.102 | -1.78 | 0.036 | 1.05  | 0.912 |
| 1417867_at   | complement factor D (adipsin)                                          | Cfd              | 1.37  | 0.653 | 1.55  | 0.685 | -1.33 | 0.163 | -1.78 | 0.021 | -1.27 | 0.394 |
| 1438451_at   | Rho GTPase-activating protein                                          | Grit             | -1.11 | 0.393 | -2.11 | 0.035 | -1.54 | 0.034 | -1.78 | 0.004 | -2.06 | 0.013 |
| 1439354_at   | region containing RIKEN cDNA 2310008H09 gene; RIKEN cDNA A2300         | LOC668373 // LOC | -1.12 | 0.510 | 1.25  | 0.254 | -1.22 | 0.311 | -1.78 | 0.028 | 1.26  | 0.544 |
| 1452878_at   | protein kinase C, epsilon                                              | Prkce            | -1.75 | 0.015 | -5.11 | 0.011 | -1.19 | 0.204 | -1.78 | 0.034 | -1.69 | 0.021 |
| 1434406_at   | SLIT-ROBO Rho GTPase activating protein 2                              | Srgap2           | -1.24 | 0.295 | -2.21 | 0.074 | -1.42 | 0.003 | -1.78 | 0.001 | -1.67 | 0.008 |
| 1453631_at   | syntaxin 8                                                             | Stx8             | -1.19 | 0.085 | 1.13  | 0.567 | -1.41 | 0.034 | -1.78 | 0.025 | -1.78 | 0.299 |
| 1439913_at   | RIKEN cDNA 1810053B01 gene                                             | 1810053B01Rik    | -1.19 | 0.413 | -1.11 | 0.505 | 1.22  | 0.190 | -1.77 | 0.001 | 1.29  | 0.942 |
| 1442620_at   | RIKEN cDNA 4931420C21 gene                                             | 4931420C21Rik    | 1.58  | 0.841 | -1.09 | 0.269 | 2.77  | 0.120 | -1.77 | 0.017 | -1.61 | 0.190 |
| 1433291_at   | RIKEN cDNA C030045M22 gene                                             | C030045M22Rik    | -1.42 | 0.179 | 1.14  | 0.830 | -1.1  | 0.427 | -1.77 | 0.043 | 1.34  | 0.998 |
| 1445534_at   | Filamin, beta                                                          | Flnb             | -1.11 | 0.277 | -1.51 | 0.033 | -2.03 | 0.045 | -1.77 | 0.006 | -2.31 | 0.001 |
| 1456067_at   | GLI-Kruppel family member GLI3                                         | Gli3             | -1.02 | 0.632 | -2.15 | 0.005 | -1.56 | 0.025 | -1.77 | 0.019 | -1.8  | 0.008 |
| 1455825_s_at | ligand of numb-protein X 1                                             | Lnx1             | 2.73  | 0.210 | 1.53  | 0.149 | 1.13  | 0.782 | -1.77 | 0.043 | 1.11  | 0.862 |
| 1426158_at   | T-cell receptor beta, variable 13                                      | Tcrb-V13         | 1.35  | 0.368 | 2.13  | 0.080 | -1.12 | 0.532 | -1.77 | 0.014 | 1.36  | 0.237 |
| 1443669_at   | Zinc finger, FYVE domain containing 28                                 | Zfyve28          | -1.04 | 0.465 | 1.23  | 0.802 | 2.32  | 0.525 | -1.77 | 0.029 | 1.01  | 0.836 |
| 1453471_at   | RIKEN cDNA 4833421E05 gene                                             | 4833421E05Rik    | 1.7   | 0.939 | 1.52  | 0.521 | 2.01  | 1.20  | -1.76 | 0.025 | 1.37  | 0.930 |
| 1432265_at   | RIKEN cDNA 4930445B16 gene                                             | 4930445B16Rik    | -1.41 | 0.226 | -1.57 | 0.064 | 1.29  | 0.521 | -1.76 | 0.022 | -1.06 | 0.558 |
| 1457682_at   | RIKEN cDNA 9030420J04 gene                                             | 9030420J04Rik    | -1.07 | 0.466 | -2.49 | 0.032 | -1.49 | 0.127 | -1.76 | 0.032 | -1.55 | 0.064 |
| 1454985_at   | RIKEN cDNA D030051N19 gene                                             | D030051N19Rik    | 1.41  | 0.379 | 1.09  | 0.863 | -1.38 | 0.001 | -1.76 | 0.003 | -2.14 | 0.004 |
| 1455729_at   | guanine nucleotide binding protein, alpha q polypeptide                | Gnaq             | -1.26 | 0.287 | -2.02 | 0.098 | -1.47 | 0.017 | -1.76 | 0.008 | -1.79 | 0.009 |
| 1446699_at   | jumonji domain containing 2A                                           | Jmjd2a           | 2.33  | 0.238 | 2.62  | 0.134 | -1.09 | 0.409 | -1.76 | 0.022 | -1.43 | 0.117 |
| 1450786_x_at | similar to PDZ and LIM domain protein 5 (Enigma homolog) (Enigma-like  | LOC669660        | 1.02  | 0.849 | -1.74 | 0.031 | -1.77 | 0.021 | -1.76 | 0.004 | -1.84 | 0.009 |
| 1441099_at   | Pleckstrin homology domain containing, family G (with RhoGef domain)   | Plekhh3          | -1.26 | 0.384 | 1.39  | 0.620 | 2.26  | 0.087 | -1.76 | 0.037 | -1.45 | 0.250 |
| 1430102_at   | ring finger protein 148                                                | Rnf148           | -1.31 | 0.084 | 1.18  | 0.187 | 1.13  | 0.631 | -1.76 | 0.024 | 1.27  | 0.645 |
| 1439306_at   | Small optic lobes homolog (Drosophila)                                 | Solh             | 1.95  | 0.466 | 2.11  | 0.197 | -1.52 | 0.193 | -1.76 | 0.027 | 1.51  | 0.116 |
| 1430940_at   | RIKEN cDNA 3110045A19 gene                                             | 3110045A19Rik    | 1.95  | 0.406 | 1.63  | 0.918 | -1.25 | 0.141 | -1.75 | 0.040 | -2.12 | 0.079 |
| 1455709_at   | RIKEN cDNA 4930422I22 gene                                             | 4930422I22Rik    | 1.32  | 0.843 | 1.33  | 0.690 | -1.57 | 0.239 | -1.75 | 0.031 | -1.53 | 0.028 |
| 1452244_at   | RIKEN cDNA 6330406I15 gene                                             | 6330406I15Rik    | 1.2   | 0.638 | 1.03  | 0.731 | -1.53 | 0.068 | -1.75 | 0.010 | -1.61 | 0.006 |
| 1419300_at   | FMS-like tyrosine kinase 1                                             | Fit1             | -1.01 | 0.942 | -2.89 | 0.010 | -1.83 | 0.031 | -1.75 | 0.000 | 1.02  | 0.703 |
| 1437147_at   | gamma-aminobutyric acid (GABA-A) receptor, subunit gamma 2             | Gabrg2           | 1.76  | 0.910 | -1.19 | 0.317 | 1.4   | 0.861 | -1.75 | 0.027 | -1.01 | 0.984 |
| 1441168_at   | Interleukin 1 receptor accessory protein-like 2                        | Il1rapl2         | -1.06 | 0.691 | 1.31  | 0.329 | 4.16  | 0.106 | -1.75 | 0.045 | -1.27 | 0.394 |
| 1432862_at   | NK2 transcription factor related, locus 4 (Drosophila)                 | Nkx2-4           | 1.01  | 0.840 | 1.22  | 0.599 | 1.79  | 0.403 | -1.75 | 0.019 | 1.32  | 0.525 |
| 1420819_at   | src-like adaptor                                                       | Sla              | 1.09  | 0.525 | 1.36  | 0.219 | 1.55  | 0.082 | -1.75 | 0.026 | 1.17  | 0.570 |
| 1445198_at   | ubiquitously transcribed tetratricopeptide repeat gene, X chromosome   | Utx              | -1.67 | 0.085 | -1.44 | 0.307 | -1.18 | 0.214 | -1.75 | 0.015 | -1.13 | 0.410 |
| 1429987_at   | RIKEN cDNA 9930013L23 gene                                             | 9930013L23Rik    | -1.29 | 0.007 | -3.17 | 0.004 | -2.03 | 0.006 | -1.74 | 0.000 | -2.44 | 0.008 |
| 1447623_s_at | RIKEN cDNA C130009A20 gene                                             | C130009A20Rik    | -1.64 | 0.226 | -4.15 | 0.099 | -1.49 | 0.029 | -1.74 | 0.005 | -1.69 | 0.008 |
| 1442526_at   | expressed sequence C77681                                              | C77681           | -1.07 | 0.563 | -1.51 | 0.269 | 1.09  | 0.985 | -1.74 | 0.035 | 1.83  | 0.378 |
| 1436380_at   | Cdc42 binding protein kinase alpha                                     | Cdc42bpa         | 1.13  | 0.236 | -1.53 | 0.039 | -1.83 | 0.021 | -1.74 | 0.005 | -1.62 | 0.026 |
| 1423953_at   | CDK5 regulatory subunit associated protein 1-like 1                    | Cdkal1           | -1.2  | 0.092 | -2.66 | 0.005 | -1.95 | 0.005 | -1.74 | 0.017 | -2.14 | 0.019 |
| 1457222_at   | cAMP responsive element binding protein 5                              | Creb5            | 1.32  | 0.851 | 1.19  | 0.645 | -1.35 | 0.152 | -1.74 | 0.038 | -1.61 | 0.027 |
| 1458832_at   | Growth hormone receptor                                                | Ghr              | -1.1  | 0.402 | -1.45 | 0.008 | -1.23 | 0.279 | -1.74 | 0.016 | -1.78 | 0.099 |
| 1440343_at   | ribosomal protein S6 kinase, polypeptide 5                             | Rps6ka5          | 1.02  | 0.567 | -1.2  | 0.403 | 1.15  | 0.026 | -1.74 | 0.009 | 1.2   | 0.510 |
| 1452222_at   | utrophin                                                               | Utrn             | -1.22 | 0.149 | -2.52 | 0.017 | -1.94 | 0.006 | -1.74 | 0.003 | -2.28 | 0.007 |
| 1460537_at   | RIKEN cDNA 9430085L16 gene                                             | 9430085L16Rik    | 1.65  | 0.532 | -1.12 | 0.564 | -1.57 | 0.140 | -1.73 | 0.046 | -1.75 | 0.102 |
| 1458307_at   | RIKEN cDNA B230334C09 gene                                             | B230334C09Rik    | -2.16 | 0.036 | 1.33  | 0.458 | -1.46 | 0.157 | -1.73 | 0.016 | 2.26  | 0.712 |
| 1452265_at   | CLIP associating protein 1                                             | Clasp1           | -1.09 | 0.202 | -1.71 | 0.006 | -1.56 | 0.014 | -1.73 | 0.001 | -1.96 | 0.000 |
| 1444955_at   | DNA segment, Chr 6, ERATO Doi 469, expressed                           | D6Ert469e        | 1.28  | 0.609 | 1.22  | 0.625 | -1.52 | 0.198 | -1.73 | 0.005 | -1.16 | 0.709 |

|              |                                                                             |                  |       |       |       |       |       |       |       |       |       |       |
|--------------|-----------------------------------------------------------------------------|------------------|-------|-------|-------|-------|-------|-------|-------|-------|-------|-------|
| 1421978_at   | glutamic acid decarboxylase 2                                               | Gad2             | -1.11 | 0.396 | -1.1  | 0.364 | 1.7   | 0.952 | -1.73 | 0.043 | -1.45 | 0.160 |
| 1453917_at   | interferon induced transmembrane protein 7                                  | Ifitm7           | -1.04 | 0.586 | 1.33  | 0.322 | 1.83  | 0.541 | -1.73 | 0.005 | 1.24  | 0.981 |
| 1456927_at   | microtubule associated serine/threonine kinase 2                            | Mast2            | -1.51 | 0.227 | -1.34 | 0.235 | -1.81 | 0.004 | -1.73 | 0.013 | -1.47 | 0.131 |
| 1435234_at   | nuclear receptor coactivator 2                                              | Ncoa2            | -1.13 | 0.235 | -2.47 | 0.031 | 1.01  | 0.584 | -1.73 | 0.014 | -1.55 | 0.122 |
| 1459473_at   | Prenyl (solanesyl) diphosphate synthase, subunit 2                          | Pdss2            | 1.09  | 0.406 | -1.63 | 0.266 | -1.63 | 0.085 | -1.73 | 0.037 | -1.45 | 0.147 |
| 1425794_at   | polymerase (DNA directed), alpha 2                                          | Pola2            | 1.28  | 0.806 | 1.18  | 0.806 | -1.47 | 0.143 | -1.73 | 0.012 | 2.27  | 0.138 |
| 1457548_at   | A disintegrin-like and metallopeptidase (repolysin type) with thrombospc    | Adamts6          | -1.11 | 0.473 | -2.14 | 0.092 | -1.69 | 0.107 | -1.72 | 0.011 | -2.45 | 0.007 |
| 1458322_x_at | RIKEN cDNA E230008N13 gene                                                  | E230008N13Rik    | 2.16  | 0.754 | 1.66  | 0.502 | 1.03  | 0.958 | -1.72 | 0.003 | -1.13 | 0.619 |
| 1423028_at   | interferon alpha 2                                                          | Ifna2            | 2.95  | 0.499 | 2     | 0.250 | 1.3   | 0.870 | -1.72 | 0.037 | -1.42 | 0.428 |
| 1429063_s_at | kinesin family member 16B                                                   | Kif16b           | -1.31 | 0.259 | -6.74 | 0.022 | -1.24 | 0.046 | -1.72 | 0.000 | -2.03 | 0.053 |
| 1436356_at   | lectin, galactose binding, soluble 7                                        | Lgals7           | 1.06  | 0.633 | -1.74 | 0.003 | -1.83 | 0.004 | -1.72 | 0.001 | -2.08 | 0.013 |
| 1452632_at   | hypothetical protein LOC637741                                              | LOC637741        | -1.13 | 0.490 | -1.68 | 0.188 | 1.87  | 0.187 | -1.72 | 0.010 | -1.18 | 0.186 |
| 1434298_at   | zinc finger homeobox 1b                                                     | Zfhx1b           | -1.29 | 0.077 | -1.57 | 0.002 | 1.03  | 0.687 | -1.72 | 0.026 | -1.34 | 0.075 |
| 1432120_at   | RIKEN cDNA 4921513D11 gene                                                  | 4921513D11Rik    | -1.18 | 0.467 | 1.13  | 0.878 | 2.36  | 0.825 | -1.71 | 0.012 | 1.47  | 0.341 |
| 1428902_at   | carbohydrate sulfotransferase 11                                            | Chst11           | -1.24 | 0.125 | -3.04 | 0.005 | -1.85 | 0.002 | -1.72 | 0.004 | -1.91 | 0.001 |
| 1419894_at   | Similar to proteasome (prosome, macropain) subunit, beta type 7             | MGC107702        | -1.03 | 0.437 | 1.31  | 0.646 | 1.11  | 0.862 | -1.71 | 0.000 | -1.35 | 0.119 |
| 1447577_x_at | propionyl-Coenzyme A carboxylase, alpha polypeptide                         | Pcca             | -1.38 | 0.236 | -1.29 | 0.186 | -1.27 | 0.168 | -1.71 | 0.045 | -1.13 | 0.314 |
| 1456214_at   | protocadherin 7                                                             | Pcdh7            | 1.03  | 0.603 | -1.47 | 0.021 | -1.81 | 0.015 | -1.71 | 0.019 | -2.25 | 0.150 |
| 1420786_a_at | RNA binding motif protein, Y chromosome, family 1, member A1                | Rbmy1a1          | 1.4   | 0.519 | -1.21 | 0.542 | -1    | 0.693 | -1.71 | 0.033 | 1.52  | 0.958 |
| 1434222_at   | signal-induced proliferation-associated 1 like 1                            | Sipa1l1          | 1.05  | 0.438 | -1.77 | 0.001 | -1.76 | 0.006 | -1.71 | 0.008 | -1.87 | 0.001 |
| 1435404_at   | dispatched homolog 2 (Drosophila)                                           | Disp2            | 2.37  | 0.061 | 3.3   | 0.002 | 2.2   | 0.265 | -1.7  | 0.033 | 1.21  | 0.473 |
| 1438623_x_at | ring-box 1                                                                  | Rbx1             | -1.78 | 0.071 | -1.47 | 0.164 | -1.43 | 0.194 | -1.7  | 0.011 | 1.38  | 0.149 |
| 1422696_at   | tweety homolog 1 (Drosophila)                                               | Ttyh1            | -1.32 | 0.284 | 1.56  | 0.345 | -1.02 | 0.935 | -1.7  | 0.012 | 1.71  | 0.474 |
| 1438944_at   | RIKEN cDNA 1700007J24 gene                                                  | 1700007J24Rik    | -1.05 | 0.625 | -1.1  | 0.397 | 1.03  | 0.422 | -1.69 | 0.048 | 1.11  | 0.668 |
| 1432687_at   | RIKEN cDNA 4833406M21 gene                                                  | 4833406M21Rik    | -1.4  | 0.300 | 1.35  | 0.375 | 1.08  | 0.971 | -1.69 | 0.036 | 1.19  | 0.504 |
| 1454535_at   | RIKEN cDNA A430110A21 gene                                                  | A430110A21Rik    | -1.5  | 0.217 | 1.03  | 0.904 | 1.27  | 0.184 | -1.69 | 0.013 | 1.2   | 0.273 |
| 1437919_at   | B double prime 1, subunit of RNA polymerase III transcription initiation fa | Bdp1             | 2.63  | 0.708 | 3.99  | 0.326 | -1.41 | 0.163 | -1.69 | 0.004 | -1.43 | 0.029 |
| 1427043_s_at | cytosolic ovarian carcinoma antigen 1                                       | Cova1            | -1.41 | 0.049 | -2.99 | 0.005 | -1.37 | 0.065 | -1.69 | 0.008 | -1.63 | 0.041 |
| 1459377_at   | paralemmin 2                                                                | Palnm2           | -1.35 | 0.342 | -1.06 | 0.480 | -1.62 | 0.212 | -1.69 | 0.031 | -1.48 | 0.210 |
| 1422271_at   | pancreatic polypeptide receptor 1                                           | Ppyr1            | -1.29 | 0.350 | 1.15  | 0.555 | -1.02 | 0.882 | -1.69 | 0.022 | 1.29  | 0.871 |
| 1423428_at   | receptor tyrosine kinase-like orphan receptor 2                             | Ror2             | -1.29 | 0.243 | -1.85 | 0.089 | -1.14 | 0.299 | -1.69 | 0.016 | -1.29 | 0.037 |
| 1436602_x_at | calcium channel, voltage-dependent, N type, alpha 1B subunit                | Cacna1b          | 1.82  | 0.732 | -1.03 | 0.792 | -2.82 | 0.048 | -1.68 | 0.033 | 1.21  | 0.737 |
| 1434705_at   | C-terminal binding protein 2 /// zinc finger, RAN-binding domain containir  | Ctbp2 /// Zranb1 | 1.12  | 0.159 | -1.13 | 0.339 | -1.44 | 0.006 | -1.68 | 0.000 | -1.43 | 0.005 |
| 1434582_at   | DNA segment, Chr 14, ERATO Doi 171, expressed                               | D14Erd171e       | -2.2  | 0.031 | -3.44 | 0.041 | -2.08 | 0.048 | -1.68 | 0.048 | -2.95 | 0.032 |
| 1417321_at   | DNA segment, Chr 4, Wayne State University 132, expressed                   | D4Wsu132e        | -1.22 | 0.383 | -1.41 | 0.301 | -1.24 | 0.025 | -1.68 | 0.012 | -1.81 | 0.019 |
| 1450768_at   | discs, large homolog 1 (Drosophila)                                         | Dlgh1            | 1.22  | 0.982 | -1.55 | 0.096 | -1.77 | 0.007 | -1.68 | 0.005 | -2.35 | 0.001 |
| 1435888_at   | epidermal growth factor receptor                                            | Egfr             | -1.14 | 0.236 | -1.8  | 0.024 | -1.44 | 0.025 | -1.68 | 0.006 | -1.68 | 0.015 |
| 1434260_at   | FCH and double SH3 domains 2                                                | Fchsd2           | -1.03 | 0.511 | -1.63 | 0.031 | -1.32 | 0.011 | -1.68 | 0.000 | -1.35 | 0.005 |
| 1437318_at   | p21 (CDKN1A)-activated kinase 3                                             | Pak3             | -1.1  | 0.414 | -3.06 | 0.036 | -1.46 | 0.017 | -1.68 | 0.009 | -2.02 | 0.064 |
| 1437617_x_at | RIKEN cDNA 1110034G24 gene                                                  | 1110034G24Rik    | 1.03  | 0.618 | 1.32  | 0.860 | 1.45  | 0.007 | -1.67 | 0.016 | 1.36  | 0.019 |
| 1433453_a_at | ankyrin repeat and BTB (POZ) domain containing 2                            | Abtb2            | -1.63 | 0.222 | -3.36 | 0.105 | -1.01 | 0.768 | -1.67 | 0.005 | -1.28 | 0.040 |
| 1455125_at   | centaurin, beta 1                                                           | Centb1           | 1.6   | 0.994 | -1.83 | 0.192 | 1.36  | 0.929 | -1.67 | 0.047 | 3.66  | 0.324 |
| 1459704_at   | Dnaj (Hsp40) homolog, subfamily C, member 7                                 | Dnajc7           | 1.27  | 0.724 | -1.2  | 0.348 | -1.19 | 0.391 | -1.67 | 0.021 | -1.18 | 0.342 |
| 1424704_at   | runt related transcription factor 2                                         | Runx2            | -1.11 | 0.370 | -1.67 | 0.017 | -1.44 | 0.001 | -1.67 | 0.007 | -1.65 | 0.016 |
| 1453583_at   | zinc finger, ZZ-type with EF hand domain 1                                  | Zzef1            | -1.22 | 0.282 | -1.33 | 0.313 | -1.37 | 0.066 | -1.67 | 0.001 | -2.05 | 0.028 |
| 1435672_at   | hypothetical protein 3830612M24                                             | 3830612M24       | -1.16 | 0.404 | -3.21 | 0.142 | -1.32 | 0.001 | -1.66 | 0.002 | -1.43 | 0.104 |
| 1431638_at   | RIKEN cDNA 4930592A05 gene                                                  | 4930592A05Rik    | -1.04 | 0.566 | 2.33  | 0.480 | 2.31  | 0.632 | -1.66 | 0.041 | 1.92  | 0.145 |
| 1434856_at   | ankyrin repeat domain 44                                                    | Ankrd44          | 1.15  | 0.495 | -2.6  | 0.061 | 1.02  | 0.616 | -1.66 | 0.011 | -1.64 | 0.041 |
| 1449486_at   | carboxylesterase 1                                                          | Ces1             | -3.07 | 0.114 | -2.25 | 0.076 | -1.53 | 0.159 | -1.66 | 0.031 | 2.27  | 0.728 |
| 1452253_at   | cysteine rich transmembrane BMP regulator 1 (chordin like)                  | Crim1            | -1.29 | 0.150 | -1.84 | 0.005 | -1.44 | 0.102 | -1.66 | 0.036 | -1.07 | 0.751 |
| 1450781_at   | high mobility group AT-hook 2                                               | Hmga2            | 1.1   | 0.952 | -1.72 | 0.056 | -1.85 | 0.000 | -1.66 | 0.007 | -1.99 | 0.003 |
| 1434418_at   | longevity assurance homolog 6 (S. cerevisiae)                               | Lass6            | -1.22 | 0.024 | -2.06 | 0.010 | -1.58 | 0.020 | -1.66 | 0.006 | -1.87 | 0.015 |
| 1439198_at   | PTK2 protein tyrosine kinase 2                                              | Ptk2             | -1.34 | 0.200 | -1.13 | 0.349 | 2.16  | 0.837 | -1.66 | 0.000 | -1.51 | 0.070 |
| 1444689_at   | WD repeat domain 67                                                         | Wdr67            | 1.54  | 0.637 | -1    | 0.485 | 1.04  | 0.793 | -1.66 | 0.041 | 1.33  | 0.118 |
| 1430459_at   | RIKEN cDNA 4632428C04 gene                                                  | 4632428C04Rik    | 1.18  | 0.965 | -1.62 | 0.129 | 2.36  | 0.160 | -1.65 | 0.037 | 1.11  | 0.510 |
| 1439066_at   | angiotensin 1                                                               | Angpt1           | -1.1  | 0.545 | -1.49 | 0.291 | 1.39  | 0.910 | -1.65 | 0.036 | -1.1  | 0.376 |
| 1455244_at   | dishevelled associated activator of morphogenesis 1                         | Daam1            | 1.25  | 0.378 | -1.32 | 0.171 | -1.37 | 0.015 | -1.65 | 0.002 | -1.65 | 0.000 |
| 1445705_x_at | dipeptidylpeptidase 8                                                       | Dpp8             | 1.77  | 0.891 | 1     | 0.437 | -1.35 | 0.227 | -1.65 | 0.034 | 1.82  | 0.847 |

|              |                                                                                                |                     |       |       |       |       |       |       |       |       |       |       |
|--------------|------------------------------------------------------------------------------------------------|---------------------|-------|-------|-------|-------|-------|-------|-------|-------|-------|-------|
| 1416242_at   | kelch-like 13 (Drosophila)                                                                     | Klhl13              | -1.43 | 0.057 | -1.02 | 0.640 | 1.61  | 0.705 | -1.65 | 0.024 | 2.37  | 0.608 |
| 1454969_at   | LY6/PLAUR domain containing 6                                                                  | Lypd6               | 1.05  | 0.651 | -1.48 | 0.238 | -1.4  | 0.141 | -1.65 | 0.049 | 1.15  | 0.154 |
| 1452251_at   | neurobeachin                                                                                   | Nbea                | -1.44 | 0.152 | -2.77 | 0.058 | -1.57 | 0.024 | -1.65 | 0.017 | -2.22 | 0.014 |
| 1457276_at   | SNF1-like kinase 2                                                                             | Snf1lk2             | 1.03  | 0.801 | -1.09 | 0.370 | -1.2  | 0.218 | -1.65 | 0.015 | 1.05  | 0.843 |
| 1450420_at   | stromal antigen 1                                                                              | Stag1               | 3.08  | 0.736 | 1.18  | 0.120 | -1.44 | 0.066 | -1.65 | 0.022 | -1.82 | 0.019 |
| 1453024_at   | WD repeat domain 37                                                                            | Wdr37               | -1    | 0.578 | -1.16 | 0.366 | -1.09 | 0.369 | -1.65 | 0.004 | -1.54 | 0.055 |
| 1447839_x_at | adrenomedullin                                                                                 | Adm                 | -1.45 | 0.226 | -2.47 | 0.068 | -1.57 | 0.012 | -1.64 | 0.000 | -1.95 | 0.008 |
| 1457425_at   | RIKEN cDNA C130038G02 gene                                                                     | C130038G02Rik       | -1.82 | 0.090 | -1.58 | 0.044 | -1.16 | 0.421 | -1.64 | 0.018 | 1.16  | 0.525 |
| 1455599_at   | glucose-fructose oxidoreductase domain containing 1                                            | Gfod1               | -1.31 | 0.175 | -1.73 | 0.128 | -1.23 | 0.127 | -1.64 | 0.038 | -1.17 | 0.179 |
| 1431687_at   | glia maturation factor, beta                                                                   | Gmfb                | -1.05 | 0.899 | -1.84 | 0.098 | -1.1  | 0.415 | -1.64 | 0.005 | 1.62  | 0.906 |
| 1450723_at   | ISL1 transcription factor, LIM/homeodomain                                                     | Isl1                | 1.22  | 0.601 | 1.19  | 0.726 | 2.55  | 0.216 | -1.64 | 0.038 | 1.02  | 0.917 |
| 1422698_s_at | jumonji, AT rich interactive domain 2                                                          | Jarid2              | 1.11  | 0.755 | -2.04 | 0.009 | -1.58 | 0.007 | -1.64 | 0.018 | -1.7  | 0.034 |
| 1451255_at   | lipolysis stimulated lipoprotein receptor                                                      | Lsr                 | 2.58  | 0.253 | 1.85  | 0.314 | 1.6   | 0.438 | -1.64 | 0.021 | 1.32  | 0.877 |
| 1459912_at   | mitogen-activated protein kinase kinase kinase 4                                               | Map4k4              | -1.1  | 0.452 | -1.56 | 0.249 | 1.26  | 0.739 | -1.64 | 0.014 | -1.14 | 0.660 |
| 1459828_at   | Serine/arginine repetitive matrix 1                                                            | Srrm1               | 1.45  | 0.995 | 1.66  | 0.409 | 1.78  | 0.015 | -1.64 | 0.022 | -1.16 | 0.326 |
| 1434603_at   | thyroid hormone receptor associated protein 2                                                  | Thrap2              | 1.03  | 0.170 | -1.49 | 0.000 | -1.55 | 0.024 | -1.64 | 0.014 | -2.04 | 0.025 |
| 1429112_at   | talin 2 /// similar to talin 2                                                                 | Tln2 /// LOC639214  | 1.28  | 0.804 | -1.44 | 0.183 | -1.87 | 0.185 | -1.64 | 0.019 | -1.19 | 0.362 |
| 1431988_at   | RIKEN cDNA 1700112E06 gene                                                                     | 1700112E06Rik       | 2.79  | 0.785 | 4.46  | 0.545 | 1.16  | 0.557 | -1.63 | 0.033 | 1.04  | 0.795 |
| 1436805_at   | RIKEN cDNA 2810457I06 gene                                                                     | 2810457I06Rik       | -1.14 | 0.374 | -1.3  | 0.012 | -1.01 | 0.921 | -1.63 | 0.004 | -1.35 | 0.076 |
| 1459838_s_at | BTB (POZ) domain containing 11                                                                 | Btbd11              | -1.24 | 0.389 | -3.27 | 0.145 | -1.2  | 0.143 | -1.63 | 0.000 | -1.43 | 0.041 |
| 1420768_a_at | DNA segment, Chr 11, Lothar Hennighausen 2, expressed                                          | D11Lgp2e            | 2.04  | 0.663 | 1.71  | 0.572 | 1.76  | 0.543 | -1.63 | 0.014 | -1.02 | 0.677 |
| 1459549_at   | DPH5 homolog (S. cerevisiae)                                                                   | Dph5                | 1.11  | 0.698 | 1.53  | 0.413 | 2.26  | 0.867 | -1.63 | 0.025 | 1.13  | 0.851 |
| 1441835_x_at | myotubularin related protein 11                                                                | Mtmr11              | -1.15 | 0.445 | -1.34 | 0.259 | 1.03  | 0.735 | -1.63 | 0.020 | 1.84  | 0.090 |
| 1449530_at   | trichorhinophalangeal syndrome I (human)                                                       | Trps1               | 1.33  | 0.333 | -1.92 | 0.043 | -1.66 | 0.005 | -1.63 | 0.004 | -1.85 | 0.075 |
| 1424358_at   | ubiquitin-conjugating enzyme E2E 2 (UBC4/5 homolog, yeast)                                     | Ube2e2              | -1.34 | 0.163 | -2.76 | 0.034 | -1.43 | 0.014 | -1.63 | 0.000 | -1.7  | 0.001 |
| 1448611_at   | WW, C2 and coiled-coil domain containing 2                                                     | Wwc2                | -1    | 0.839 | -1.42 | 0.007 | -1.31 | 0.031 | -1.63 | 0.031 | -1.69 | 0.031 |
| 1458587_at   | RIKEN cDNA 2310047D07 gene                                                                     | 2310047D07Rik       | -1.02 | 0.846 | -1.03 | 0.709 | -1.31 | 0.156 | -1.62 | 0.020 | 1.26  | 0.867 |
| 1428987_at   | dynein light chain roadblock-type 2                                                            | Dynlrb2             | 1.41  | 0.625 | 1.47  | 0.854 | -2.23 | 0.035 | -1.62 | 0.042 | -1.04 | 0.592 |
| 1443287_at   | gene model 1337, (NCBI)                                                                        | Gm1337              | 1.82  | 0.944 | 1.11  | 0.608 | 1.2   | 0.779 | -1.62 | 0.013 | 1.03  | 0.850 |
| 1454958_at   | glycogen synthase kinase 3 beta                                                                | Gsk3b               | 1.33  | 0.417 | -1.09 | 0.447 | -1.41 | 0.025 | -1.62 | 0.001 | -1.72 | 0.001 |
| 1456263_at   | Notch gene homolog 4 (Drosophila)                                                              | Notch4              | -1.51 | 0.114 | 1.15  | 0.095 | -1.26 | 0.085 | -1.62 | 0.012 | 1.21  | 0.904 |
| 1419107_at   | oligophrenin 1                                                                                 | Ophn1               | 1.04  | 0.763 | -1.52 | 0.047 | -1.08 | 0.222 | -1.62 | 0.012 | -1.07 | 0.486 |
| 1425383_a_at | pre B-cell leukemia transcription factor 1 /// region containing RIKEN cDNA Pbx1 /// LOC67687C | Pbx1 /// LOC67687C  | -1.12 | 0.389 | -2.01 | 0.066 | -1.32 | 0.059 | -1.62 | 0.010 | -2.16 | 0.000 |
| 1453891_at   | polymerase I and transcript release factor                                                     | Ptrf                | 1.8   | 0.094 | 1.03  | 0.806 | 1.21  | 0.933 | -1.62 | 0.018 | 1.06  | 0.976 |
| 1452833_at   | Rap guanine nucleotide exchange factor (GEF) 2                                                 | Rapgef2             | 1.09  | 0.423 | -1.19 | 0.211 | -1.24 | 0.029 | -1.62 | 0.000 | -1.51 | 0.011 |
| 1427493_at   | sodium channel and clathrin linker 1                                                           | Solt1               | -2.08 | 0.171 | -1.08 | 0.437 | 1.12  | 0.804 | -1.62 | 0.045 | -1.27 | 0.168 |
| 1422118_at   | syncoilin                                                                                      | Sync                | 1.6   | 0.261 | 1     | 0.961 | -1.21 | 0.092 | -1.62 | 0.039 | -1.21 | 0.240 |
| 1439129_at   | RIKEN cDNA 1110060D06 gene /// dedicator of cytokinesis 5                                      | 1110060D06Rik /// I | 1.14  | 0.981 | -1.62 | 0.077 | -1.36 | 0.040 | -1.61 | 0.013 | -1.99 | 0.014 |
| 1442966_at   | RIKEN cDNA 5330421F07 gene                                                                     | 5330421F07Rik       | 2.11  | 0.603 | 1.96  | 0.201 | 1.6   | 0.168 | -1.61 | 0.048 | -1.16 | 0.313 |
| 1442232_at   | RIKEN cDNA C530025M09 gene                                                                     | C530025M09Rik       | 1.24  | 0.716 | 1.9   | 0.909 | 2.14  | 0.662 | -1.61 | 0.043 | -1.07 | 0.634 |
| 1436983_at   | CREB binding protein                                                                           | Crebbp              | -1.11 | 0.421 | -1.06 | 0.396 | -1.45 | 0.057 | -1.61 | 0.015 | -1.29 | 0.086 |
| 1436090_at   | ectonucleotide pyrophosphatase/phosphodiesterase 6                                             | Enpp6               | -1.42 | 0.123 | 1.12  | 0.763 | 2.35  | 0.956 | -1.61 | 0.010 | 1.36  | 0.110 |
| 1416255_at   | gap junction membrane channel protein alpha 4                                                  | Gja4                | 1.42  | 0.231 | 1.37  | 0.405 | -1.31 | 0.169 | -1.61 | 0.001 | 1.9   | 0.998 |
| 1458354_x_at | keratin 28                                                                                     | Krt28               | 1.39  | 0.523 | 2.09  | 0.197 | -2.16 | 0.055 | -1.61 | 0.045 | -1.39 | 0.161 |
| 1439386_x_at | methionine adenosyltransferase II, alpha                                                       | Mat2a               | -1.46 | 0.309 | -1.69 | 0.278 | 1.55  | 0.936 | -1.61 | 0.009 | 1.68  | 0.258 |
| 1455685_at   | microtubule associated monooxygenase, calponin and LIM domain containing 2                     | Mical2              | 1.34  | 0.833 | -1    | 0.305 | -1.59 | 0.018 | -1.61 | 0.029 | -1.77 | 0.029 |
| 1456715_at   | Pam, highwire, rpm 1                                                                           | Phr1                | 1.36  | 0.291 | -2.59 | 0.022 | 1.05  | 0.603 | -1.61 | 0.028 | -1.47 | 0.302 |
| 1439619_at   | transcription factor 12                                                                        | Tcf12               | -1.2  | 0.081 | -1.18 | 0.339 | -1.42 | 0.176 | -1.61 | 0.030 | -1.24 | 0.182 |
| 1436499_at   | transmembrane protein 23                                                                       | Tmem23              | -1.08 | 0.076 | -1.53 | 0.023 | -1.38 | 0.024 | -1.61 | 0.001 | -1.55 | 0.030 |
| 1442175_at   | RIKEN cDNA C030027H14 gene                                                                     | C030027H14Rik       | -1.31 | 0.060 | -4.62 | 0.014 | -1.48 | 0.005 | -1.6  | 0.022 | -1.78 | 0.019 |
| 1444279_at   | HECT, UBA and WWE domain containing 1                                                          | Huwe1               | 1.24  | 0.436 | -1.54 | 0.030 | 1.27  | 0.870 | -1.6  | 0.043 | -1.83 | 0.072 |
| 1437339_s_at | proprotein convertase subtilisin/kexin type 5                                                  | Pcsk5               | -1.24 | 0.386 | -1.45 | 0.361 | -1.1  | 0.365 | -1.6  | 0.043 | -1.77 | 0.053 |
| 1452209_at   | plakophilin 4                                                                                  | Pkp4                | -1.24 | 0.238 | -2.01 | 0.027 | -1.41 | 0.009 | -1.6  | 0.000 | -1.6  | 0.004 |
| 1437197_at   | sorbin and SH3 domain containing 2                                                             | Sorbs2              | 1.18  | 0.863 | -1.51 | 0.145 | -1.6  | 0.006 | -1.6  | 0.027 | -1.55 | 0.007 |
| 1420726_x_at | trimethyllysine hydroxylase, epsilon                                                           | Tmlhe               | 1.07  | 0.783 | -1.34 | 0.270 | 1.04  | 0.825 | -1.6  | 0.008 | -1.07 | 0.575 |
| 1446479_at   | TNNI3 interacting kinase                                                                       | Tnni3k              | -1.16 | 0.411 | 1.83  | 0.768 | 1.81  | 0.736 | -1.6  | 0.026 | -1.56 | 0.233 |
| 1431991_at   | RIKEN cDNA 2410004P03 gene                                                                     | 2410004P03Rik       | -1.2  | 0.326 | 1.11  | 0.331 | 1.32  | 0.339 | -1.59 | 0.044 | 1.12  | 0.827 |
| 1430633_s_at | RIKEN cDNA C430045I18 gene                                                                     | C430045I18Rik       | 1.23  | 0.796 | -1.01 | 0.413 | -1.45 | 0.099 | -1.59 | 0.003 | -1.14 | 0.413 |

|              |                                                                                                  |       |       |       |       |       |       |       |       |       |       |
|--------------|--------------------------------------------------------------------------------------------------|-------|-------|-------|-------|-------|-------|-------|-------|-------|-------|
| 1438833_at   | cancer susceptibility candidate 5 /// similar to cancer susceptibility candic Casc5 /// LOC6772C | 1.23  | 0.282 | 1.12  | 0.570 | -1.37 | 0.100 | -1.59 | 0.019 | -1.12 | 0.390 |
| 1425015_at   | Eph receptor B2                                                                                  | -1.28 | 0.223 | -1.82 | 0.189 | -1.54 | 0.020 | -1.59 | 0.048 | -1.27 | 0.203 |
| 1452982_at   | insulin-like growth factor I receptor                                                            | -1.05 | 0.553 | -2.17 | 0.008 | -1.54 | 0.002 | -1.59 | 0.020 | -1.84 | 0.022 |
| 1431254_at   | kelch repeat and BTB (POZ) domain containing 11 /// similar to Protein K Kbtbd11 /// LOC632      | 1.88  | 0.122 | -1.4  | 0.264 | -1.54 | 0.133 | -1.59 | 0.044 | 1.27  | 0.565 |
| 1438666_at   | low density lipoprotein receptor class A domain containing 3                                     | -1.09 | 0.260 | -2.56 | 0.005 | -1.18 | 0.421 | -1.59 | 0.007 | -1.84 | 0.013 |
| 1437181_at   | pellino 2                                                                                        | -1.11 | 0.129 | -2.09 | 0.005 | -1.46 | 0.002 | -1.59 | 0.002 | -1.7  | 0.006 |
| 1450610_at   | urocortin                                                                                        | 1.34  | 0.568 | -1.06 | 0.580 | -1.04 | 0.466 | -1.59 | 0.014 | 1.07  | 0.962 |
| 1451577_at   | zinc finger and BTB domain containing 20                                                         | 1.12  | 0.362 | -2.11 | 0.005 | -1.74 | 0.009 | -1.59 | 0.040 | -2.37 | 0.001 |
| 1456154_at   | Zinc finger protein 444                                                                          | 1.15  | 0.760 | -1.25 | 0.375 | 2.89  | 0.976 | -1.59 | 0.007 | 1.12  | 0.871 |
| 1431398_at   | RIKEN cDNA 5730446D14 gene                                                                       | -1.46 | 0.201 | -1.31 | 0.126 | -1.28 | 0.099 | -1.58 | 0.041 | -1.19 | 0.434 |
| 1437764_at   | RIKEN cDNA A730011L01 gene                                                                       | 1.18  | 0.747 | -1.01 | 0.646 | -1.04 | 0.585 | -1.58 | 0.026 | -1.01 | 0.764 |
| 1440372_at   | ADP-ribosylation factor-like 15                                                                  | 1.62  | 0.517 | -1.37 | 0.370 | -1.12 | 0.781 | -1.58 | 0.048 | -4.73 | 0.064 |
| 1436440_at   | RIKEN cDNA B230107K20 gene                                                                       | -1.38 | 0.223 | -1.67 | 0.187 | -1.64 | 0.011 | -1.58 | 0.030 | -1.69 | 0.130 |
| 1427867_at   | Myosin, heavy polypeptide 1, skeletal muscle, adult                                              | 1.37  | 0.588 | 2.09  | 0.378 | 1.36  | 0.777 | -1.58 | 0.005 | 1.24  | 0.728 |
| 1436907_at   | neuron navigator 1                                                                               | -1.15 | 0.110 | -2.36 | 0.006 | -1.37 | 0.019 | -1.58 | 0.000 | -1.81 | 0.002 |
| 1459357_at   | Neurofascin                                                                                      | 1.4   | 0.741 | -1.09 | 0.386 | 1.35  | 0.288 | -1.58 | 0.030 | 1.37  | 0.173 |
| 1426455_at   | serologically defined colon cancer antigen 10                                                    | -1.26 | 0.198 | -2.42 | 0.018 | -1.52 | 0.077 | -1.58 | 0.034 | -1.51 | 0.059 |
| 1428822_a_at | sorting nexin 24                                                                                 | -1.09 | 0.370 | -1.98 | 0.016 | -1.53 | 0.043 | -1.58 | 0.015 | -1.83 | 0.000 |
| 1433384_at   | RIKEN cDNA 9330199C07 gene                                                                       | -1.97 | 0.052 | 1.69  | 0.597 | 2.27  | 0.817 | -1.57 | 0.039 | 1.07  | 0.951 |
| 1455396_at   | ATPase, class I, type 8B, member 1                                                               | 1.26  | 0.705 | -1.8  | 0.073 | -1.5  | 0.002 | -1.57 | 0.012 | -1.53 | 0.025 |
| 1448676_at   | calcium/calmodulin-dependent protein kinase II, beta                                             | -1.06 | 0.656 | -1.14 | 0.433 | -2.07 | 0.051 | -1.57 | 0.019 | 1.04  | 0.650 |
| 1439493_at   | RIKEN cDNA D630040G17 gene /// similar to zinc finger protein 64 (prec D630040G17Rik /// I       | -1.16 | 0.298 | -1.58 | 0.036 | -1.24 | 0.041 | -1.57 | 0.003 | -1.31 | 0.047 |
| 1426911_at   | desmocollin 2                                                                                    | 2.29  | 0.370 | 1.49  | 0.290 | 2.27  | 0.793 | -1.57 | 0.030 | 1.17  | 0.905 |
| 1436413_at   | fyn-related kinase                                                                               | 1.28  | 0.668 | 1.07  | 0.959 | 1.13  | 0.880 | -1.57 | 0.019 | 1.09  | 0.298 |
| 1459718_x_at | Kruppel-like factor 6                                                                            | -1.35 | 0.195 | -1.54 | 0.107 | 1.17  | 0.997 | -1.57 | 0.008 | 1.01  | 0.994 |
| 1443498_at   | methylmalonic aciduria (cobalamin deficiency) type B homolog (human)                             | -1.38 | 0.061 | -1.13 | 0.248 | -1.3  | 0.010 | -1.57 | 0.044 | -1.05 | 0.694 |
| 1452294_at   | protocadherin 1                                                                                  | -1.45 | 0.202 | 1.33  | 0.032 | 1     | 0.582 | -1.57 | 0.034 | 1.42  | 0.783 |
| 1418390_at   | PHD finger protein 21A                                                                           | -1.08 | 0.374 | -1.49 | 0.040 | -1.16 | 0.245 | -1.57 | 0.007 | -1.42 | 0.046 |
| 1427231_at   | roundabout homolog 1 (Drosophila)                                                                | -1.33 | 0.075 | -2.18 | 0.003 | -1.25 | 0.068 | -1.57 | 0.002 | -1.37 | 0.018 |
| 1434096_at   | solute carrier family 4 (anion exchanger), member 4                                              | 1.18  | 0.982 | -2.13 | 0.057 | -1.4  | 0.075 | -1.57 | 0.011 | -1.95 | 0.008 |
| 1429037_at   | RIKEN cDNA 1700019A02 gene                                                                       | -2.22 | 0.086 | 1.01  | 0.627 | 3.24  | 0.285 | -1.56 | 0.039 | 1.49  | 0.925 |
| 1456831_at   | AT rich interactive domain 5B (Mrf1 like)                                                        | 1.5   | 0.020 | 1.73  | 0.222 | -1.06 | 0.564 | -1.56 | 0.026 | -1.41 | 0.091 |
| 1442223_at   | Enabled homolog (Drosophila)                                                                     | 1.03  | 0.462 | -1.65 | 0.011 | -1.65 | 0.111 | -1.56 | 0.038 | -2.05 | 0.035 |
| 1456698_s_at | heterogeneous nuclear ribonucleoprotein D-like                                                   | -1.32 | 0.291 | -1.5  | 0.199 | -1.24 | 0.146 | -1.56 | 0.012 | -1.34 | 0.031 |
| 1454731_at   | myosin X                                                                                         | 1.13  | 0.553 | -1.34 | 0.164 | -1.5  | 0.018 | -1.56 | 0.039 | -1.56 | 0.015 |
| 1421413_a_at | PDZ and LIM domain 5 /// similar to PDZ and LIM domain protein 5 (Eniç Pölim5 /// LOC66966       | 12.26 | 0.588 | 7     | 0.464 | -1.9  | 0.034 | -1.56 | 0.045 | -1.95 | 0.040 |
| 1449853_at   | sideroflexin 2 /// similar to Sideroflexin-2                                                     | -1.16 | 0.207 | -1.24 | 0.099 | 1.28  | 0.350 | -1.56 | 0.004 | 1.16  | 0.939 |
| 1426595_at   | solute carrier family 18 (vesicular monoamine), member 1                                         | 1.01  | 0.742 | -1.18 | 0.535 | -1.12 | 0.447 | -1.56 | 0.014 | 1.38  | 0.430 |
| 1432502_at   | RIKEN cDNA 1700028N14 gene                                                                       | 1.08  | 0.471 | 2.02  | 0.686 | -1.37 | 0.335 | -1.55 | 0.027 | -1.21 | 0.741 |
| 1452366_at   | RIKEN cDNA 4732435N03 gene                                                                       | -1.29 | 0.286 | -2.82 | 0.035 | -1.64 | 0.017 | -1.55 | 0.003 | -1.94 | 0.000 |
| 1430933_at   | RIKEN cDNA 5730433K22 gene                                                                       | 1.08  | 0.773 | -1.15 | 0.306 | 2.18  | 0.521 | -1.55 | 0.025 | -1.15 | 0.581 |
| 1429064_at   | DIP2 disco-interacting protein 2 homolog C (Drosophila)                                          | -1.44 | 0.104 | -3.12 | 0.032 | -1.41 | 0.002 | -1.55 | 0.004 | -1.99 | 0.008 |
| 1429021_at   | Eph receptor A4                                                                                  | 1.24  | 0.055 | -1.51 | 0.071 | -1.04 | 0.380 | -1.55 | 0.016 | -1.41 | 0.042 |
| 1421729_a_at | fer (fms/fps related) protein kinase, testis specific 2                                          | 1.64  | 0.793 | -1.09 | 0.367 | -1.58 | 0.002 | -1.55 | 0.009 | -1.46 | 0.031 |
| 1433485_x_at | G protein-coupled receptor 56                                                                    | 2.4   | 0.109 | 2.15  | 0.160 | 1.7   | 0.087 | -1.55 | 0.040 | 2.14  | 0.940 |
| 1455314_at   | LIM domain containing preferred translocation partner in lipoma                                  | -1.14 | 0.045 | -1.94 | 0.001 | -1.66 | 0.004 | -1.55 | 0.000 | -1.99 | 0.009 |
| 1443018_at   | Neural cell adhesion molecule 1                                                                  | 1.06  | 0.759 | -1.37 | 0.165 | -1.12 | 0.329 | -1.55 | 0.044 | -1.95 | 0.081 |
| 1422673_at   | protein kinase C, mu                                                                             | -1.38 | 0.174 | -2.74 | 0.022 | -1.27 | 0.036 | -1.55 | 0.003 | -1.53 | 0.045 |
| 1453980_at   | RIKEN cDNA 5330434G04 gene                                                                       | 1.3   | 0.503 | 1.4   | 0.446 | 2.44  | 0.948 | -1.54 | 0.040 | -1.85 | 0.107 |
| 1455372_at   | cytoplasmic polyadenylation element binding protein 3                                            | -1.2  | 0.324 | -2.67 | 0.136 | -1.25 | 0.158 | -1.54 | 0.015 | -1.45 | 0.132 |
| 1455078_at   | Heat shock protein 90kDa alpha (cytosolic), class A member 1                                     | 1.04  | 0.800 | -1.61 | 0.011 | -1.37 | 0.008 | -1.54 | 0.017 | -1.38 | 0.016 |
| 1424125_at   | potassium channel, subfamily K, member 13                                                        | -1.29 | 0.084 | 1.05  | 0.813 | 1.6   | 0.069 | -1.54 | 0.033 | 1.08  | 0.660 |
| 1457363_at   | hypothetical protein LOC654469                                                                   | 1.13  | 0.874 | 1.1   | 0.894 | 1.18  | 0.119 | -1.54 | 0.001 | 1.17  | 0.927 |
| 1436190_at   | neural precursor cell expressed, developmentally down-regulated gene 1                           | 1.31  | 0.962 | -1.24 | 0.450 | 1.01  | 0.957 | -1.54 | 0.008 | -1.08 | 0.615 |
| 1455030_at   | protein tyrosine phosphatase, receptor type, J                                                   | -1.5  | 0.018 | -2.07 | 0.027 | -1.36 | 0.207 | -1.54 | 0.024 | -1.88 | 0.004 |
| 1434563_at   | ribosomal protein S6 kinase polypeptide 1                                                        | 1     | 0.828 | -1    | 0.607 | -1.14 | 0.163 | -1.54 | 0.006 | -1.64 | 0.002 |
| 1438735_at   | remodeling and spacing factor 1                                                                  | -1.16 | 0.381 | -1.16 | 0.246 | -1.33 | 0.053 | -1.54 | 0.006 | -1.13 | 0.286 |
| 1442365_at   | Reticulon 3                                                                                      | 1.12  | 0.413 | -1.29 | 0.108 | 1.36  | 0.217 | -1.54 | 0.047 | 1.02  | 0.982 |

|              |                                                                                |                    |       |       |       |       |       |       |       |       |       |       |
|--------------|--------------------------------------------------------------------------------|--------------------|-------|-------|-------|-------|-------|-------|-------|-------|-------|-------|
| 1441517_at   | Sprouty protein with EVH-1 domain 1, related sequence                          | Spred1             | -1.12 | 0.704 | 1.06  | 0.777 | 1.12  | 0.399 | -1.54 | 0.032 | 1.01  | 0.717 |
| 1453015_at   | RIKEN cDNA 5830471E12 gene                                                     | 5830471E12Rik      | -1.23 | 0.336 | -1.78 | 0.137 | -1.31 | 0.008 | -1.53 | 0.001 | -1.64 | 0.020 |
| 1433939_at   | hypothetical protein A730046J16                                                | A730046J16         | -1.3  | 0.090 | -2.39 | 0.020 | -1.19 | 0.151 | -1.53 | 0.014 | -1.72 | 0.005 |
| 1446319_at   | ankyrin repeat and SOCS box-containing protein 7                               | Asb7               | 1.42  | 0.645 | 1.25  | 0.609 | -1.13 | 0.210 | -1.53 | 0.042 | -1.16 | 0.286 |
| 1438207_at   | golgi-specific brefeldin A-resistance factor 1                                 | Gbf1               | 2.51  | 0.908 | 2.49  | 0.332 | -1.18 | 0.135 | -1.53 | 0.008 | -1.21 | 0.153 |
| 1451451_at   | grancalcin                                                                     | Gca                | 1.16  | 0.537 | -1.22 | 0.650 | -1.29 | 0.113 | -1.53 | 0.024 | 1.38  | 0.423 |
| 1419603_at   | similar to Interferon-activatable protein 204 (Ifi-204) (Interferon-inducible  | LOC672547          | -1.39 | 0.065 | 1.03  | 0.878 | -1.22 | 0.477 | -1.53 | 0.022 | 1.18  | 0.746 |
| 1446316_at   | Lipin 2                                                                        | Lpin2              | 1.99  | 0.569 | 2     | 0.816 | 1.28  | 0.982 | -1.53 | 0.009 | 1.17  | 0.761 |
| 1437201_at   | leucine rich repeat containing 4C                                              | Lrrc4c             | -1.26 | 0.266 | -3.7  | 0.014 | -1.38 | 0.012 | -1.53 | 0.005 | -1.52 | 0.076 |
| 1451474_a_at | poly (ADP-ribose) polymerase family, member 8                                  | Parp8              | 1.15  | 0.213 | -1.22 | 0.210 | -1.55 | 0.006 | -1.53 | 0.001 | -1.59 | 0.005 |
| 1431680_a_at | protein tyrosine phosphatase, receptor type, K                                 | Ptpnk              | 1.35  | 0.650 | -1.88 | 0.039 | -1.7  | 0.073 | -1.53 | 0.032 | -1.72 | 0.189 |
| 1443762_s_at | SET binding factor 2                                                           | Sbf2               | -1.32 | 0.225 | -2.23 | 0.049 | -1.33 | 0.004 | -1.53 | 0.004 | -1.55 | 0.007 |
| 1442482_at   | RIKEN cDNA 1700106N22 gene                                                     | 1700106N22Rik      | -1.9  | 0.242 | -1.23 | 0.377 | 1.28  | 0.449 | -1.52 | 0.048 | -1.3  | 0.280 |
| 1436302_at   | RIKEN cDNA 2410193C02 gene                                                     | 2410193C02Rik      | -1.12 | 0.236 | -2.26 | 0.003 | -1.46 | 0.015 | -1.52 | 0.001 | -1.72 | 0.010 |
| 1444969_at   | RIKEN cDNA 5033414K04 gene                                                     | 5033414K04Rik      | 1.47  | 0.893 | 1.15  | 0.808 | 1.41  | 0.793 | -1.52 | 0.031 | 1.34  | 0.844 |
| 1437542_at   | RIKEN cDNA A730095J18 gene                                                     | A730095J18Rik      | -1.01 | 0.715 | -2.51 | 0.023 | -1.08 | 0.350 | -1.52 | 0.008 | -1.51 | 0.043 |
| 1449827_at   | aggrecan 1                                                                     | Agc1               | 1.05  | 0.924 | 1.13  | 0.648 | 1.58  | 0.694 | -1.52 | 0.009 | 1.5   | 0.625 |
| 1435648_at   | RIKEN cDNA B430119L13 gene                                                     | B430119L13Rik      | -1.44 | 0.189 | -1.28 | 0.327 | -1.15 | 0.470 | -1.52 | 0.034 | 1.06  | 0.634 |
| 1448007_at   | bromodomain adjacent to zinc finger domain, 2B                                 | Baz2b              | -1.3  | 0.188 | 1.14  | 0.875 | 1     | 0.855 | -1.52 | 0.007 | -1.02 | 0.503 |
| 1456692_at   | Bromodomain containing 1                                                       | Brd1               | 1.01  | 0.988 | -1.03 | 0.723 | 1.14  | 0.095 | -1.52 | 0.050 | 1.82  | 0.428 |
| 1425555_at   | Cdc2-related kinase, arginine-rich                                             | Ckrks              | 1.07  | 0.375 | -1.21 | 0.288 | 1.1   | 0.810 | -1.52 | 0.043 | 1.09  | 0.726 |
| 1415758_at   | furry homolog-like (Drosophila)                                                | Fryl               | -1.15 | 0.322 | -2.06 | 0.080 | -1.35 | 0.045 | -1.52 | 0.012 | -1.47 | 0.059 |
| 1418125_at   | INO80 complex homolog 1 (S. cerevisiae)                                        | Inoc1              | -1.12 | 0.462 | -1.27 | 0.298 | -1.33 | 0.010 | -1.52 | 0.007 | -1.17 | 0.162 |
| 1428644_at   | mannoside acetylglucosaminyltransferase 5                                      | Mgat5              | -1.45 | 0.195 | -2.39 | 0.128 | -1.33 | 0.047 | -1.52 | 0.022 | -1.31 | 0.100 |
| 1425844_a_at | RNA guanylyltransferase and 5'-phosphatase                                     | Rngtt              | 2.18  | 0.261 | 1.47  | 0.623 | -1.17 | 0.264 | -1.52 | 0.003 | -1.51 | 0.094 |
| 1429523_a_at | solute carrier family 39 (metal ion transporter), member 5                     | Slc39a5            | 2.65  | 0.256 | 1.88  | 0.384 | -2.07 | 0.106 | -1.52 | 0.048 | 3.37  | 0.554 |
| 1450853_at   | transducin-like enhancer of split 4, homolog of Drosophila E (spl)             | Tle4               | -1.21 | 0.393 | -1.53 | 0.291 | 1.06  | 0.771 | -1.52 | 0.003 | -1.43 | 0.089 |
| 1457714_at   | RIKEN cDNA 2310005N03 gene                                                     | 2310005N03Rik      | 1.23  | 0.984 | -1.2  | 0.335 | 1.62  | 0.512 | -1.51 | 0.045 | 3.76  | 0.382 |
| 1432797_at   | RIKEN cDNA 2900060N12 gene                                                     | 2900060N12Rik      | 1.61  | 0.142 | -1.33 | 0.109 | 1.76  | 0.030 | -1.51 | 0.008 | 1.41  | 0.808 |
| 1449439_at   | Kruppel-like factor 7 (ubiquitous)                                             | Klf7               | -1.11 | 0.187 | -1.5  | 0.041 | -1.47 | 0.008 | -1.51 | 0.026 | -1.51 | 0.046 |
| 1426759_at   | mitogen-activated protein kinase kinase kinase kinase 3 /// similar to mit     | Map4k3 /// LOC6755 | 1.12  | 0.152 | -1.2  | 0.049 | -1.41 | 0.047 | -1.51 | 0.007 | -1.69 | 0.001 |
| 1447895_x_at | PAN3 polyA specific ribonuclease subunit homolog (S. cerevisiae)               | Pan3               | -1.01 | 0.519 | -1.16 | 0.357 | -1.01 | 0.719 | -1.51 | 0.006 | -1.19 | 0.269 |
| 1428710_at   | Ras-like without CAAX 1                                                        | Rit1               | -1.05 | 0.590 | 1.02  | 0.725 | -1.06 | 0.399 | -1.51 | 0.011 | -1.31 | 0.082 |
| 1434149_at   | transcription factor 4                                                         | Tcf4               | 1.19  | 0.836 | -1.54 | 0.066 | -1.42 | 0.030 | -1.51 | 0.040 | -1.37 | 0.058 |
| 1457492_at   | Triple functional domain (PTPRF interacting)                                   | Trio               | 1.05  | 0.957 | 1.04  | 0.889 | -1.18 | 0.306 | -1.51 | 0.007 | -1.44 | 0.188 |
| 1434335_at   | expressed sequence AI317237                                                    | AI317237           | -1.17 | 0.067 | -1.64 | 0.024 | -1.18 | 0.003 | -1.5  | 0.018 | -1.38 | 0.003 |
| 1457069_at   | activating signal cointegrator 1 complex subunit 3                             | Ascc3              | -1.11 | 0.467 | -2.11 | 0.148 | -1.42 | 0.084 | -1.5  | 0.016 | -1.62 | 0.047 |
| 1440833_at   | cell division cycle 2-like 5 (cholinesterase-related cell division controller) | Cdc2l5             | -1.34 | 0.308 | -1.56 | 0.243 | -1.28 | 0.177 | -1.5  | 0.019 | -1.37 | 0.087 |
| 1438255_at   | checkpoint suppressor 1                                                        | Ches1              | -1    | 0.861 | -1.7  | 0.014 | -1.35 | 0.012 | -1.5  | 0.039 | -1.3  | 0.060 |
| 1421331_at   | heparan sulfate (glucosamine) 3-O-sulfotransferase 3B1                         | Hs3st3b1           | -1.32 | 0.285 | -1.09 | 0.509 | 1.64  | 0.552 | -1.5  | 0.013 | 1.27  | 0.487 |
| 1454389_at   | Leucine-rich repeats and calponin homology (CH) domain containing 4            | Lrch4              | -1.33 | 0.330 | -1.12 | 0.563 | 1.87  | 0.949 | -1.5  | 0.003 | 1.06  | 0.489 |
| 1429911_at   | microcephaly, primary autosomal recessive 1                                    | Mcp1               | -1.16 | 0.037 | -2.34 | 0.006 | -1.49 | 0.034 | -1.5  | 0.032 | -1.41 | 0.010 |
| 1429197_s_at | RAB GTPase activating protein 1-like                                           | Rabgap1l           | -1.8  | 0.008 | -2.32 | 0.006 | -1.41 | 0.160 | -1.5  | 0.005 | -1.61 | 0.052 |
| 1419447_s_at | TBC1 domain family, member 1                                                   | Tbc1d1             | 1.17  | 0.447 | -1.26 | 0.126 | -1.31 | 0.003 | -1.5  | 0.001 | -1.43 | 0.009 |
| 1440791_x_at | transcription elongation factor A (SII), 2                                     | Teoa2              | 1.55  | 0.858 | 2.1   | 0.986 | -1.02 | 0.471 | -1.5  | 0.008 | -1.03 | 0.771 |
| 1433894_at   | expressed sequence AI591476                                                    | AI591476           | 2.21  | 0.333 | 1.1   | 0.303 | -1.73 | 0.017 | -1.49 | 0.026 | -1.68 | 0.077 |
| 1444514_at   | RIKEN cDNA B930096F20 gene                                                     | B930096F20Rik      | -2.16 | 0.021 | -2.19 | 0.013 | 1.95  | 0.144 | -1.49 | 0.028 | 2.05  | 0.284 |
| 1458602_at   | bobby sox homolog (Drosophila)                                                 | Bbx                | -1.23 | 0.145 | -1.8  | 0.137 | 1.02  | 0.290 | -1.49 | 0.043 | 1.6   | 0.143 |
| 1427488_a_at | baculoviral IAP repeat-containing 6                                            | Birc6              | 1.04  | 0.600 | 1.03  | 0.687 | -1.1  | 0.625 | -1.49 | 0.011 | -1.53 | 0.001 |
| 1424836_a_at | CLIP associating protein 2                                                     | Clasp2             | -1    | 0.638 | -1.72 | 0.133 | -1.23 | 0.201 | -1.49 | 0.002 | -1.36 | 0.006 |
| 1449620_s_at | DNA segment, Chr 16, Wayne State University 65, expressed                      | D16Wsu65e          | 1.39  | 0.497 | -1.18 | 0.341 | 1.13  | 0.371 | -1.49 | 0.043 | -1.07 | 0.395 |
| 1439263_at   | fibroblast growth factor inducible 15                                          | Fin15              | 1.11  | 0.497 | -1.3  | 0.267 | 1.03  | 0.652 | -1.49 | 0.046 | -1.03 | 0.661 |
| 1428579_at   | formin-like 2                                                                  | Fmnl2              | 1.26  | 0.449 | -2.45 | 0.034 | -1.45 | 0.031 | -1.49 | 0.007 | -1.81 | 0.018 |
| 1454780_at   | UDP-N-acetyl-alpha-D-galactosamine:polypeptide N-acetylgalactosamin            | Galntl4            | -1.13 | 0.099 | -1.97 | 0.000 | -1.73 | 0.000 | -1.49 | 0.000 | -1.89 | 0.000 |
| 1452690_at   | KH-type splicing regulatory protein                                            | Khsrp              | 1.29  | 0.661 | 1.22  | 0.244 | 1.08  | 0.857 | -1.49 | 0.001 | 1.81  | 0.155 |
| 1432177_a_at | menage a trois 1                                                               | Mnat1              | 1.11  | 0.613 | -1.31 | 0.082 | -1.29 | 0.024 | -1.49 | 0.022 | -1.61 | 0.003 |
| 1445230_at   | Nuclear receptor co-repressor 1                                                | Ncor1              | 2.07  | 0.049 | -1.12 | 0.532 | 1.1   | 0.977 | -1.49 | 0.017 | -1.43 | 0.055 |
| 1449315_at   | odd Oz/ten-m homolog 3 (Drosophila)                                            | Odz3               | -1.5  | 0.113 | -1.99 | 0.098 | -1.61 | 0.184 | -1.49 | 0.009 | -1.33 | 0.168 |

|              |                                                                              |                    |       |       |       |       |       |       |       |       |       |       |
|--------------|------------------------------------------------------------------------------|--------------------|-------|-------|-------|-------|-------|-------|-------|-------|-------|-------|
| 1422744_at   | phosphorylase kinase alpha 1                                                 | Phka1              | 1.25  | 0.608 | -1.58 | 0.078 | -1.1  | 0.367 | -1.49 | 0.044 | -1.35 | 0.321 |
| 1434005_at   | RNA binding motif, single stranded interacting protein 1                     | Rbms1              | -1.01 | 0.888 | -1.53 | 0.001 | -1.37 | 0.002 | -1.49 | 0.003 | -1.58 | 0.005 |
| 1458064_at   | Ring finger protein 34                                                       | Rnf34              | 1.59  | 0.970 | 1.71  | 0.834 | 1.43  | 0.928 | -1.49 | 0.012 | 2.05  | 0.094 |
| 1452502_at   | small EDRK-rich factor 1                                                     | Serf1              | 1.28  | 0.673 | -1.14 | 0.372 | -1.05 | 0.631 | -1.49 | 0.049 | 1.39  | 0.257 |
| 1454894_at   | SMAD specific E3 ubiquitin protein ligase 2                                  | Smurf2             | 1.12  | 0.422 | -1.07 | 0.536 | -1.37 | 0.000 | -1.49 | 0.004 | -1.44 | 0.002 |
| 1419551_s_at | serine/threonine kinase 39, STE20/SPS1 homolog (yeast)                       | Stk39              | 1.16  | 0.921 | -1.85 | 0.012 | -1.17 | 0.132 | -1.49 | 0.027 | -1.39 | 0.052 |
| 1423434_at   | TEA domain family member 1                                                   | Tead1              | 1.11  | 0.694 | -1.47 | 0.146 | -1.28 | 0.088 | -1.49 | 0.017 | -1.76 | 0.011 |
| 1435028_at   | WD repeat domain 7                                                           | Wdr7               | -1.17 | 0.172 | -2.29 | 0.008 | -1.39 | 0.055 | -1.49 | 0.014 | -1.68 | 0.007 |
| 1444705_at   | Amyloid beta (A4) precursor protein                                          | App                | -1.08 | 0.371 | -1.21 | 0.266 | -1.43 | 0.114 | -1.48 | 0.025 | -1.06 | 0.525 |
| 1452023_at   | ankyrin repeat and SOCS box-containing 16                                    | Asb16              | -1.32 | 0.098 | 1.08  | 0.835 | -1.07 | 0.106 | -1.48 | 0.009 | 2.1   | 0.569 |
| 1455082_at   | Casitas B-lineage lymphoma b                                                 | Cblb               | -1.07 | 0.213 | -1.69 | 0.007 | -1.41 | 0.018 | -1.48 | 0.044 | -1.97 | 0.041 |
| 1457470_at   | DNA segment, Chr 3, ERATO Doi 452, expressed                                 | D3Ert452e          | -1.13 | 0.414 | -1.18 | 0.393 | -1.51 | 0.097 | -1.48 | 0.027 | -1.81 | 0.035 |
| 1431354_a_at | phenylalanine-tRNA synthetase 2 (mitochondrial)                              | Fars2              | 1.04  | 0.699 | -2.29 | 0.027 | -1.51 | 0.022 | -1.48 | 0.030 | -2.01 | 0.002 |
| 1450063_at   | formin 2                                                                     | Fmn2               | -1.57 | 0.024 | -2.47 | 0.003 | -1.77 | 0.006 | -1.48 | 0.012 | -1.74 | 0.007 |
| 1447640_s_at | pre B-cell leukemia transcription factor 3                                   | Pbx3               | -1.17 | 0.432 | -2.01 | 0.182 | -1.28 | 0.004 | -1.48 | 0.009 | -1.39 | 0.029 |
| 1450167_at   | RAB37, member of RAS oncogene family                                         | Rab37              | -1.56 | 0.134 | -1.3  | 0.201 | -1.1  | 0.454 | -1.48 | 0.006 | 1.64  | 0.842 |
| 1429449_at   | sterile alpha motif domain containing 4                                      | Samd4              | 1.3   | 0.449 | -1.28 | 0.218 | -1.71 | 0.009 | -1.48 | 0.013 | -1.7  | 0.010 |
| 1452868_at   | ubiquitin specific peptidase 24                                              | Usp24              | -1    | 0.854 | -1.08 | 0.068 | -1.22 | 0.000 | -1.48 | 0.002 | -1.33 | 0.005 |
| 1439751_at   | zinc finger protein 708                                                      | Zfp708             | 2.78  | 0.688 | 1.25  | 0.425 | 1.95  | 0.701 | -1.48 | 0.040 | -1.23 | 0.432 |
| 1436116_x_at | RIKEN cDNA 2900057D21 gene                                                   | 2900057D21Rik      | -1.53 | 0.252 | -1.5  | 0.284 | -1.07 | 0.570 | -1.47 | 0.019 | -1.26 | 0.223 |
| 1433048_at   | RIKEN cDNA 4933428L01 gene                                                   | 4933428L01Rik      | -1.01 | 0.748 | 1.01  | 0.904 | 1.3   | 0.470 | -1.47 | 0.026 | 1.31  | 0.912 |
| 1434221_at   | cDNA sequence BC030863                                                       | BC030863           | 1.68  | 0.351 | 1.02  | 0.505 | -1.25 | 0.018 | -1.47 | 0.003 | -1.43 | 0.015 |
| 1439850_at   | cDNA sequence BC066028                                                       | BC066028           | 1.11  | 0.594 | 1.85  | 0.195 | 1.22  | 0.859 | -1.47 | 0.022 | -1.19 | 0.368 |
| 1434645_at   | RIKEN cDNA C530008M17 gene                                                   | C530008M17Rik      | 1.29  | 0.356 | -1.85 | 0.032 | -1.15 | 0.144 | -1.47 | 0.007 | -1.23 | 0.011 |
| 1444970_at   | expressed sequence C79870                                                    | C79870             | -1.33 | 0.340 | 1.64  | 0.954 | -1.42 | 0.128 | -1.47 | 0.026 | 1.2   | 0.800 |
| 1454795_at   | Cobl-like 1                                                                  | Cobl1              | 1.02  | 0.912 | -1.54 | 0.052 | -1.03 | 0.647 | -1.47 | 0.006 | -1.19 | 0.039 |
| 1436624_at   | dynamin 3                                                                    | Dnm3               | -1.67 | 0.102 | -2.35 | 0.004 | -1.06 | 0.468 | -1.47 | 0.004 | -1.22 | 0.343 |
| 1450932_s_at | dedicator of cytokinesis 9 /// similar to Dedicator of cytokinesis protein 9 | Dock9 /// LOC6703C | 1.06  | 0.582 | -3.95 | 0.010 | -1.3  | 0.114 | -1.47 | 0.005 | -1.76 | 0.006 |
| 1436341_at   | homeobox containing 1                                                        | Hmbox1             | -1.14 | 0.053 | -1.2  | 0.235 | 1.03  | 0.669 | -1.47 | 0.009 | -1.67 | 0.001 |
| 1451496_at   | metastasis suppressor 1                                                      | Mtss1              | -1.02 | 0.500 | 1.27  | 0.795 | 1.07  | 0.915 | -1.47 | 0.024 | 1.34  | 0.561 |
| 1434640_at   | neurensin 2                                                                  | Nrsn2              | 1.68  | 0.385 | 1.42  | 0.340 | 1.22  | 0.989 | -1.47 | 0.014 | -1.27 | 0.297 |
| 1449260_at   | RAB3D, member RAS oncogene family                                            | Rab3d              | 1.3   | 0.816 | 1.95  | 0.554 | 1.08  | 0.443 | -1.47 | 0.026 | 1.08  | 0.842 |
| 1448918_at   | solute carrier organic anion transporter family, member 3a1                  | Sloc3a1            | 1.29  | 0.754 | -2.13 | 0.042 | -1.37 | 0.092 | -1.47 | 0.044 | -1.54 | 0.078 |
| 1430407_at   | RIKEN cDNA 3110035C09 gene                                                   | 3110035C09Rik      | 1.2   | 0.767 | 1.04  | 0.596 | -1.38 | 0.039 | -1.46 | 0.028 | -1.27 | 0.204 |
| 1436597_at   | ankyrin repeat and KH domain containing 1                                    | Ankhd1             | 1.55  | 0.126 | 1.28  | 0.487 | -1.31 | 0.143 | -1.46 | 0.015 | -1.26 | 0.288 |
| 1428806_at   | casein kinase 1, gamma 1                                                     | Csnk1g1            | 1     | 0.927 | -1.06 | 0.482 | -1.29 | 0.001 | -1.46 | 0.002 | -1.41 | 0.005 |
| 1422887_a_at | C-terminal binding protein 2                                                 | Ctbp2              | 1.03  | 0.459 | -1.22 | 0.068 | -1.39 | 0.009 | -1.46 | 0.000 | -1.37 | 0.012 |
| 1434380_at   | guanylate binding protein 7                                                  | Gbp7               | 1.77  | 0.056 | 1.34  | 0.464 | 1.11  | 0.971 | -1.46 | 0.018 | -1.09 | 0.605 |
| 1454693_at   | Histone deacetylase 4                                                        | Hdac4              | 1.19  | 0.393 | -1.21 | 0.069 | -1.41 | 0.049 | -1.46 | 0.023 | -1.77 | 0.053 |
| 1418265_s_at | interferon regulatory factor 2                                               | Irf2               | 1.01  | 0.987 | -1.21 | 0.383 | -1.33 | 0.084 | -1.46 | 0.000 | -1.11 | 0.442 |
| 1458351_s_at | kelch-like 2, Mayven (Drosophila)                                            | Klhl2              | -1.3  | 0.327 | -1.8  | 0.161 | -1.1  | 0.165 | -1.46 | 0.011 | -1.32 | 0.046 |
| 1428647_at   | region containing RIKEN cDNA 2310056B04 gene; pre B-cell leukemia t          | LOC676870          | 1.49  | 0.973 | -1.62 | 0.142 | -1.34 | 0.114 | -1.46 | 0.027 | -1.88 | 0.043 |
| 1452056_s_at | protein phosphatase 3, catalytic subunit, alpha isoform                      | Ppp3ca             | -1.21 | 0.023 | -2.15 | 0.008 | -1.25 | 0.127 | -1.46 | 0.006 | -1.37 | 0.001 |
| 1420766_at   | suppressor of cytokine signaling 7                                           | Socs7              | -1.02 | 0.722 | 1.39  | 0.100 | -1.35 | 0.142 | -1.46 | 0.022 | 1.33  | 0.607 |
| 1448639_a_at | spermatogenesis associated 5                                                 | Spata5             | -1.23 | 0.262 | -1.19 | 0.268 | -1.35 | 0.013 | -1.46 | 0.005 | -1.58 | 0.001 |
| 1456976_at   | wingless-related MMTV integration site 5A                                    | Wnt5a              | -1.1  | 0.511 | 1.04  | 0.687 | -1.4  | 0.123 | -1.46 | 0.049 | 1.05  | 0.973 |
| 1429228_at   | RIKEN cDNA 4930534B04 gene                                                   | 4930534B04Rik      | 1.5   | 0.612 | -1.56 | 0.125 | 1.06  | 0.656 | -1.45 | 0.044 | -1.54 | 0.031 |
| 1430685_at   | RIKEN cDNA 6330503C03 gene                                                   | 6330503C03Rik      | -1.05 | 0.881 | 1.67  | 0.296 | 1.04  | 0.936 | -1.45 | 0.050 | 3.09  | 0.170 |
| 1435975_at   | expressed sequence AI115600                                                  | AI115600           | -1.14 | 0.090 | -1.28 | 0.042 | 1.15  | 0.251 | -1.45 | 0.015 | -1.33 | 0.119 |
| 1442257_at   | RIKEN cDNA B130021B11 gene                                                   | B130021B11Rik      | -1.37 | 0.215 | -2.33 | 0.141 | -1.38 | 0.102 | -1.45 | 0.015 | -1.63 | 0.067 |
| 1443099_at   | CDNA sequence BC087945                                                       | BC087945           | -1.21 | 0.085 | 1.05  | 0.922 | 1.19  | 0.853 | -1.45 | 0.008 | -1.04 | 0.515 |
| 1429329_at   | COX10 homolog, cytochrome c oxidase assembly protein, heme A: heme           | Cox10              | -1.07 | 0.535 | -1.14 | 0.423 | -1.2  | 0.241 | -1.45 | 0.018 | -1.39 | 0.009 |
| 1457839_at   | DEAH (Asp-Glu-Ala-His) box polypeptide 40                                    | Dhx40              | 1.41  | 0.071 | 1.41  | 0.048 | 1.23  | 0.112 | -1.45 | 0.012 | 1.18  | 0.345 |
| 1448665_at   | dystrophin, muscular dystrophy                                               | Dmd                | -1.02 | 0.519 | -1.49 | 0.028 | -1.33 | 0.015 | -1.45 | 0.039 | -1.39 | 0.019 |
| 1434489_at   | engulfment and cell motility 3, ced-12 homolog (C. elegans)                  | Elmo3              | -1.33 | 0.148 | 1.15  | 0.505 | 1.22  | 0.339 | -1.45 | 0.009 | 1.55  | 0.143 |
| 1425500_x_at | Hypothetical protein LOC625794                                               | LOC625794          | 1.59  | 0.831 | 1.63  | 0.858 | 1.99  | 0.319 | -1.45 | 0.025 | 1.33  | 0.885 |
| 1435185_at   | leucine rich repeat and coiled-coil domain containing 1                      | Lrrcc1             | 2.51  | 0.498 | 1.67  | 0.560 | 1.42  | 0.425 | -1.45 | 0.013 | -1.41 | 0.046 |
| 1455941_s_at | mitogen activated protein kinase kinase 5                                    | Map2k5             | -1.32 | 0.257 | -2.33 | 0.102 | -1.22 | 0.016 | -1.45 | 0.004 | -1.31 | 0.030 |



|              |                                                                           |                     |       |       |       |       |       |       |       |       |       |       |
|--------------|---------------------------------------------------------------------------|---------------------|-------|-------|-------|-------|-------|-------|-------|-------|-------|-------|
| 1426850_a_at | mitogen activated protein kinase kinase 6                                 | Map2k6              | -1.33 | 0.169 | -1.46 | 0.113 | -1.27 | 0.324 | -1.45 | 0.001 | -1.03 | 0.738 |
| 1442853_at   | Mitogen-activated protein kinase 8 interacting protein 3                  | Mapk8ip3            | -1.04 | 0.915 | -1    | 0.852 | 1.05  | 0.847 | -1.45 | 0.023 | -1.06 | 0.356 |
| 1427212_at   | mitogen-activated protein kinase associated protein 1                     | Mapkap1             | 1.39  | 0.788 | -1.39 | 0.111 | -1.29 | 0.016 | -1.45 | 0.003 | -1.48 | 0.007 |
| 1449298_a_at | phosphodiesterase 1A, calmodulin-dependent                                | Pde1a               | -1.07 | 0.396 | -1.2  | 0.312 | 1.21  | 0.113 | -1.45 | 0.040 | 1.58  | 0.102 |
| 1421594_a_at | synaptotagmin-like 2                                                      | Sytl2               | -1.09 | 0.141 | -2.02 | 0.004 | -1.33 | 0.004 | -1.45 | 0.027 | -1.43 | 0.026 |
| 1423186_at   | T-cell lymphoma invasion and metastasis 2                                 | Tiam2               | 1.52  | 0.298 | 1.06  | 0.614 | -1.28 | 0.052 | -1.45 | 0.013 | -1.69 | 0.001 |
| 1456385_x_at | UBX domain containing 3                                                   | Ubx3                | -1.12 | 0.495 | -1.35 | 0.379 | 1.55  | 0.777 | -1.45 | 0.050 | 1.12  | 0.745 |
| 1446365_at   | vesicle transport through interaction with t-SNAREs homolog 1A (yeast)    | Vti1a               | 1.35  | 0.054 | 1.39  | 0.293 | -1.05 | 0.474 | -1.45 | 0.023 | 1.02  | 0.613 |
| 1427980_at   | RIKEN cDNA 4933407C03 gene                                                | 4933407C03Rik       | 1.3   | 0.240 | -1.06 | 0.740 | -1.37 | 0.002 | -1.44 | 0.019 | -1.4  | 0.001 |
| 1457371_at   | RIKEN cDNA 5230400G24 gene                                                | 5230400G24Rik       | -1.32 | 0.431 | 1.04  | 0.563 | 1.14  | 0.779 | -1.44 | 0.039 | 1.88  | 0.998 |
| 1432902_at   | RIKEN cDNA 9130414P19 gene                                                | 9130414P19Rik       | -1.1  | 0.596 | 1.24  | 0.763 | 1.9   | 0.456 | -1.44 | 0.046 | -1.52 | 0.083 |
| 1458434_at   | RIKEN cDNA A730009L09 gene                                                | A730009L09Rik       | 1.5   | 0.637 | 1.11  | 0.553 | -1.12 | 0.409 | -1.44 | 0.031 | -1.31 | 0.273 |
| 1456111_at   | RIKEN cDNA D930028F11 gene                                                | D930028F11Rik       | -1.25 | 0.301 | -4.25 | 0.058 | -1.1  | 0.421 | -1.44 | 0.032 | -1.45 | 0.149 |
| 1424586_at   | EH domain binding protein 1                                               | Ehbp1               | -1.19 | 0.028 | -2.61 | 0.004 | -1.37 | 0.008 | -1.44 | 0.014 | -1.71 | 0.031 |
| 1418242_at   | Fas-associated factor 1                                                   | Faf1                | -1.27 | 0.202 | -2.28 | 0.058 | -1.41 | 0.002 | -1.44 | 0.007 | -1.69 | 0.002 |
| 1452280_at   | FERM, RhoGEF (Arhgef) and pleckstrin domain protein 1 (chondrocyte-c      | Farp1               | 1.44  | 0.705 | -1.2  | 0.200 | -1.3  | 0.019 | -1.44 | 0.000 | -1.65 | 0.000 |
| 1422018_at   | human immunodeficiency virus type I enhancer binding protein 2            | Hivep2              | 1.23  | 0.748 | -1.12 | 0.303 | -1.39 | 0.018 | -1.44 | 0.025 | -1.92 | 0.000 |
| 1454066_at   | myc induced nuclear antigen                                               | Mina                | -1.25 | 0.294 | -1.07 | 0.486 | 1.28  | 0.485 | -1.44 | 0.042 | -1.15 | 0.013 |
| 1434900_at   | MKL (megakaryoblastic leukemia)/myocardin-like 1                          | Mkl1                | 1.31  | 0.483 | 1.25  | 0.647 | -1.32 | 0.001 | -1.44 | 0.018 | -1.3  | 0.155 |
| 1439205_at   | nuclear factor of activated T-cells, cytoplasmic, calcineurin-dependent 2 | Nfatc2              | -1.28 | 0.173 | -1.49 | 0.165 | -1.32 | 0.163 | -1.44 | 0.013 | -1.16 | 0.208 |
| 1455936_a_at | RNA binding protein gene with multiple splicing                           | Rbpms               | -1.34 | 0.314 | -1.88 | 0.150 | -1.29 | 0.026 | -1.44 | 0.001 | -1.24 | 0.098 |
| 1445781_at   | SH3 domain protein D19                                                    | Sh3d19              | 1.08  | 0.732 | -1.41 | 0.120 | -1.1  | 0.493 | -1.44 | 0.047 | -1.3  | 0.343 |
| 1442753_at   | tumor necrosis factor, alpha-induced protein 8                            | Tnfaip8             | 1.18  | 0.862 | 1.75  | 0.425 | 1.02  | 0.616 | -1.44 | 0.025 | 1.67  | 0.732 |
| 1433460_at   | tetratricopeptide repeat domain 7B                                        | Ttc7b               | 1.73  | 0.492 | -1.04 | 0.307 | -1.37 | 0.006 | -1.44 | 0.002 | -1.52 | 0.024 |
| 1437556_at   | zinc finger homeodomain 4                                                 | Zfx4                | 1.16  | 0.224 | -2.53 | 0.001 | -1.04 | 0.694 | -1.44 | 0.010 | -1.57 | 0.007 |
| 1438515_at   | zinc finger protein 207                                                   | Zfp207              | 1.12  | 0.873 | 1.11  | 0.877 | -1.1  | 0.373 | -1.44 | 0.024 | 1.66  | 0.080 |
| 1420469_at   | RIKEN cDNA 4933411G06 gene                                                | 4933411G06Rik       | 1.47  | 0.730 | 1.47  | 0.849 | 1.77  | 0.159 | -1.43 | 0.009 | -1.09 | 0.721 |
| 1457218_at   | RIKEN cDNA 6430510M02 gene                                                | 6430510M02Rik       | 1.08  | 0.821 | -1.05 | 0.511 | 1.27  | 0.564 | -1.43 | 0.013 | 1.16  | 0.622 |
| 1456948_at   | adaptor-related protein complex AP-4, epsilon 1                           | Ap4e1               | -1.61 | 0.125 | 1.11  | 0.742 | 1.42  | 0.230 | -1.43 | 0.037 | -1.9  | 0.066 |
| 1450460_at   | aquaporin 3                                                               | Aqp3                | 1.32  | 0.524 | 1.19  | 0.941 | -1.13 | 0.515 | -1.43 | 0.019 | -1.51 | 0.704 |
| 1425099_a_at | aryl hydrocarbon receptor nuclear translocator-like                       | Arntl               | -1.08 | 0.412 | -1.56 | 0.015 | -1.38 | 0.020 | -1.43 | 0.010 | -1.77 | 0.007 |
| 1436030_at   | cache domain containing 1                                                 | Cachd1              | -1.32 | 0.315 | -2.49 | 0.095 | -1.15 | 0.239 | -1.43 | 0.002 | -1.44 | 0.027 |
| 1459457_at   | calcium/calmodulin-dependent protein kinase II, delta                     | Camk2d              | 1.01  | 0.580 | -1.39 | 0.296 | -1.51 | 0.027 | -1.43 | 0.048 | -2.13 | 0.014 |
| 1451972_at   | glucocorticoid induced transcript 1                                       | Glicci1             | 2.13  | 0.745 | -1.36 | 0.164 | 1.37  | 0.303 | -1.43 | 0.001 | 1.16  | 0.345 |
| 1435332_at   | 5-hydroxytryptamine (serotonin) receptor 7                                | Htr7                | -1.06 | 0.425 | -1.01 | 0.949 | -1.04 | 0.558 | -1.43 | 0.034 | -1.03 | 0.409 |
| 1457030_at   | miRNA containing gene                                                     | Mirg                | 1.21  | 0.599 | -1.45 | 0.074 | 1.36  | 0.690 | -1.43 | 0.023 | -1.38 | 0.081 |
| 1459665_s_at | MRV integration site 1                                                    | Mrv1                | -1.73 | 0.120 | -1.91 | 0.138 | -1.47 | 0.019 | -1.43 | 0.035 | -1.21 | 0.118 |
| 1431701_a_at | PDZ domain containing 1                                                   | Pdzk1               | 1.17  | 0.687 | 2.07  | 0.729 | 1.04  | 0.738 | -1.43 | 0.032 | 1.72  | 0.157 |
| 1431539_at   | SAM domain, SH3 domain and nuclear localization signals, 1                | Samsn1              | -1.45 | 0.167 | -1.01 | 0.562 | -1.08 | 0.392 | -1.43 | 0.046 | 1.46  | 0.913 |
| 1430433_at   | RIKEN cDNA 4933406J08 gene /// hypothetical protein LOC640572             | 4933406J08Rik /// L | 1.55  | 0.591 | -1.05 | 0.570 | -1.09 | 0.167 | -1.42 | 0.043 | -1.36 | 0.250 |
| 1436143_at   | RIKEN cDNA 4933425L03 gene                                                | 4933425L03Rik       | -1.28 | 0.050 | -1.93 | 0.063 | -1.57 | 0.004 | -1.42 | 0.024 | -1.67 | 0.025 |
| 1451891_a_at | dysferlin                                                                 | Dysf                | 1.56  | 0.787 | 1.26  | 0.965 | 1.01  | 0.955 | -1.42 | 0.001 | -1.22 | 0.124 |
| 1449514_at   | G protein-coupled receptor kinase 5                                       | Gprk5               | 1.09  | 0.933 | -1.61 | 0.085 | -1.31 | 0.074 | -1.42 | 0.023 | -1.46 | 0.008 |
| 1435671_at   | mirror-image polyductly gene 1 homolog (human)                            | Mipol1              | -1    | 0.554 | -2.13 | 0.119 | -1.22 | 0.140 | -1.42 | 0.012 | -1.31 | 0.162 |
| 1445134_at   | MKL/myocardin-like 2                                                      | Mkl2                | 1.22  | 0.219 | -1.35 | 0.208 | 1.56  | 0.427 | -1.42 | 0.020 | -1.63 | 0.200 |
| 1436262_x_at | OTU domain containing 5                                                   | Otu5                | 2.75  | 0.524 | 2.01  | 0.493 | -1.02 | 0.812 | -1.42 | 0.017 | -1.2  | 0.384 |
| 1449405_at   | tensin 1                                                                  | Tns1                | -1.04 | 0.500 | -1.32 | 0.040 | -1.53 | 0.004 | -1.42 | 0.008 | -1.46 | 0.006 |
| 1435110_at   | unc-5 homolog B (C. elegans)                                              | Unc5b               | -1.12 | 0.240 | -1.45 | 0.063 | -1.16 | 0.223 | -1.42 | 0.024 | -1.31 | 0.030 |
| 1421778_at   | vomeroneasal 1, receptor B2                                               | V1rb2               | -1.19 | 0.653 | 1.37  | 0.970 | 1.09  | 0.501 | -1.42 | 0.048 | 1.18  | 0.524 |
| 1452274_at   | zinc finger, AN1-type domain 3                                            | Zfand3              | -1.12 | 0.345 | -1.63 | 0.103 | -1.58 | 0.011 | -1.42 | 0.002 | -1.58 | 0.004 |
| 1438798_at   | RIKEN cDNA 4931406P16 gene                                                | 4931406P16Rik       | -1.1  | 0.554 | 1.05  | 0.705 | -1.09 | 0.664 | -1.41 | 0.016 | 1.09  | 0.886 |
| 1460080_at   | expressed sequence AI645535                                               | AI645535            | 1.54  | 0.829 | 1.8   | 0.723 | -1.05 | 0.585 | -1.41 | 0.007 | -1.26 | 0.134 |
| 1458604_at   | Rho/rac guanine nucleotide exchange factor (GEF) 18                       | Arhgef18            | 1.36  | 0.990 | 2.06  | 0.067 | -1.41 | 0.182 | -1.41 | 0.020 | -1.15 | 0.563 |
| 1418815_at   | cadherin 2                                                                | Cdh2                | -1.23 | 0.104 | -1.75 | 0.007 | -1.22 | 0.038 | -1.41 | 0.028 | -1.48 | 0.018 |
| 1452291_at   | centaurin, delta 1                                                        | Centd1              | 1.18  | 0.806 | 1.01  | 0.711 | -1.06 | 0.513 | -1.41 | 0.042 | -1.61 | 0.015 |
| 1449419_at   | dedicator of cytokinesis 8                                                | Dock8               | -1.18 | 0.231 | -1.56 | 0.022 | -1.28 | 0.123 | -1.41 | 0.035 | 1.01  | 0.741 |
| 1439688_at   | fibulin 1                                                                 | Fbln1               | 1.64  | 0.293 | -1.61 | 0.149 | 1.24  | 0.209 | -1.41 | 0.015 | -1.69 | 0.035 |
| 1422742_at   | human immunodeficiency virus type I enhancer binding protein 1            | Hivep1              | -1.14 | 0.273 | -1.49 | 0.041 | -1.08 | 0.395 | -1.41 | 0.022 | -1.22 | 0.205 |

|              |                                                                         |               |       |       |       |       |       |       |       |       |       |       |
|--------------|-------------------------------------------------------------------------|---------------|-------|-------|-------|-------|-------|-------|-------|-------|-------|-------|
| 1422445_at   | integrin alpha 6                                                        | Itga6         | 1.02  | 0.995 | -1.67 | 0.034 | -1.16 | 0.047 | -1.41 | 0.002 | -1.33 | 0.008 |
| 1435884_at   | intersectin 1 (SH3 domain protein 1A)                                   | Itsn1         | -1.32 | 0.354 | -1.33 | 0.345 | -1.06 | 0.466 | -1.41 | 0.033 | -1.07 | 0.920 |
| 1460723_at   | melanocortin 5 receptor                                                 | Mc5r          | -1.06 | 0.749 | 1.29  | 0.159 | -1.47 | 0.265 | -1.41 | 0.036 | 1.2   | 0.806 |
| 1416891_at   | numb gene homolog (Drosophila)                                          | Numb          | -1.01 | 0.740 | -1.39 | 0.011 | -1.2  | 0.050 | -1.41 | 0.008 | -1.4  | 0.002 |
| 1446821_at   | Protocadherin 17                                                        | Pcdh17        | 1.88  | 0.862 | 1.99  | 0.264 | 1.22  | 0.843 | -1.41 | 0.038 | 1.5   | 0.878 |
| 1434653_at   | PTK2 protein tyrosine kinase 2 beta                                     | PTK2b         | -1.05 | 0.703 | -1.83 | 0.010 | -1.29 | 0.003 | -1.41 | 0.026 | -1.29 | 0.125 |
| 1438163_x_at | Rhomboid domain containing 2                                            | Rhbdd2        | 1.58  | 0.333 | 2.75  | 0.505 | 1.04  | 0.977 | -1.41 | 0.039 | 1.64  | 0.624 |
| 1427650_a_at | runt related transcription factor 1                                     | Runx1         | -1.15 | 0.124 | -1.08 | 0.515 | -1.16 | 0.266 | -1.41 | 0.013 | -1.67 | 0.084 |
| 1423658_at   | signal peptide peptidase 3                                              | Sppl3         | -1.12 | 0.361 | -1.29 | 0.084 | -1.25 | 0.048 | -1.41 | 0.050 | -1.26 | 0.047 |
| 1447624_s_at | storkhead box 2                                                         | Stox2         | -1.04 | 0.568 | -1.31 | 0.063 | -1.06 | 0.446 | -1.41 | 0.000 | -1.26 | 0.005 |
| 1450117_at   | transcription factor 3                                                  | Tcf3          | -1.23 | 0.318 | -1.51 | 0.155 | 1.03  | 0.879 | -1.41 | 0.019 | -1.53 | 0.016 |
| 1426435_at   | transmembrane protein 135                                               | Tmem135       | 1.05  | 0.836 | -2.18 | 0.005 | -1.16 | 0.031 | -1.41 | 0.019 | -1.92 | 0.001 |
| 1458438_at   | RIKEN cDNA 4933415L06 gene                                              | 4933415L06Rik | -1.37 | 0.235 | -1.68 | 0.010 | 1.05  | 0.996 | -1.4  | 0.008 | 1.01  | 0.904 |
| 1448460_at   | activin A receptor, type 1                                              | Acvr1         | 1.31  | 0.908 | 1.14  | 0.453 | -1.3  | 0.043 | -1.4  | 0.003 | -1.55 | 0.001 |
| 1437659_at   | amyotrophic lateral sclerosis 2 (juvenile) chromosome region, candidate | Als2cr11      | 1.25  | 0.268 | 1.3   | 0.264 | 1.29  | 0.568 | -1.4  | 0.002 | -1.27 | 0.338 |
| 1424842_a_at | Rho GTPase activating protein 24                                        | Arhgap24      | 1.1   | 0.360 | -1.17 | 0.214 | -1.2  | 0.129 | -1.4  | 0.017 | -1.51 | 0.033 |
| 1437645_at   | activating transcription factor 7                                       | Atf7          | 1.21  | 0.780 | 1.38  | 0.657 | -1.06 | 0.558 | -1.4  | 0.035 | -1.33 | 0.123 |
| 1427505_a_at | CASP2 and RIPK1 domain containing adaptor with death domain             | Cradd         | -1.47 | 0.206 | -2.71 | 0.105 | -1.01 | 0.699 | -1.4  | 0.034 | -1.55 | 0.080 |
| 1449884_at   | EF-hand calcium binding domain 2                                        | Efcab2        | 1.13  | 0.960 | -1.28 | 0.151 | -1.08 | 0.423 | -1.4  | 0.026 | 1.83  | 0.284 |
| 1432260_at   | G protein-coupled receptor 39                                           | Gpr39         | 1.48  | 0.508 | 1.08  | 0.449 | -1.23 | 0.152 | -1.4  | 0.027 | 1.01  | 0.892 |
| 1455746_at   | kinesin family member 13A                                               | Kif13a        | 1.23  | 0.061 | -1.86 | 0.020 | -1.19 | 0.008 | -1.4  | 0.003 | -1.42 | 0.033 |
| 1451846_at   | nebulin                                                                 | Neb1          | 1.6   | 0.415 | 1.14  | 0.473 | -2.21 | 0.080 | -1.4  | 0.015 | 1.01  | 0.898 |
| 1419053_at   | peroxisomal biogenesis factor 14                                        | Pex14         | -1    | 0.770 | -1.59 | 0.035 | -1.13 | 0.263 | -1.4  | 0.001 | -1.38 | 0.048 |
| 1449799_s_at | plakophilin 2                                                           | Pkp2          | -1.15 | 0.378 | -1.67 | 0.092 | -1.28 | 0.054 | -1.4  | 0.000 | -1.4  | 0.002 |
| 1439774_at   | paired related homeobox 1                                               | Prrx1         | -1.1  | 0.501 | -1.33 | 0.206 | -1.14 | 0.182 | -1.4  | 0.010 | -1.33 | 0.028 |
| 1447672_x_at | protein serine kinase H1                                                | Pskh1         | -1.29 | 0.348 | -1.33 | 0.300 | 1.1   | 0.981 | -1.4  | 0.028 | 1.34  | 0.098 |
| 1452324_at   | plasmacytoma variant translocation 1                                    | Pvt1          | -1.19 | 0.408 | -1.3  | 0.382 | -1.39 | 0.067 | -1.4  | 0.015 | -1.79 | 0.004 |
| 1455181_at   | RAS p21 protein activator 2                                             | Rasa2         | -1.01 | 0.704 | -1.38 | 0.135 | -1.29 | 0.032 | -1.4  | 0.020 | -1.5  | 0.020 |
| 1437700_at   | Schwannomin interacting protein 1                                       | Schip1        | 1.23  | 0.630 | -1.08 | 0.416 | -1.11 | 0.284 | -1.4  | 0.011 | -1.46 | 0.069 |
| 1427685_a_at | synaptotagmin 2                                                         | Synj2         | 1.13  | 0.819 | 1.09  | 0.910 | -1.32 | 0.018 | -1.4  | 0.002 | -1.25 | 0.000 |
| 1434393_at   | ubiquitin specific peptidase 34                                         | Usp34         | 1.57  | 0.150 | 1.09  | 0.548 | -1.29 | 0.011 | -1.4  | 0.014 | -1.83 | 0.015 |
| 1436746_at   | WNK lysine deficient protein kinase 1                                   | Wnk1          | -1.29 | 0.169 | -1.72 | 0.009 | -1.62 | 0.046 | -1.4  | 0.041 | -1.23 | 0.085 |
| 1426053_a_at | xenotropic and polytropic retrovirus receptor 1                         | Xpr1          | 1.15  | 0.950 | -1.23 | 0.120 | 1.05  | 0.904 | -1.4  | 0.039 | -1.33 | 0.080 |
| 1421301_at   | Zic finger protein of the cerebellum 2                                  | Zic2          | -1.03 | 0.504 | -1.64 | 0.150 | 1.2   | 0.845 | -1.4  | 0.019 | -1.22 | 0.315 |
| 1453087_at   | RIKEN cDNA 6330403L08 gene                                              | 6330403L08Rik | 1.45  | 0.800 | 1.05  | 0.696 | -1.24 | 0.173 | -1.39 | 0.048 | 1.04  | 0.966 |
| 1434197_at   | attractin                                                               | Atrn          | 1.14  | 0.239 | -1.46 | 0.027 | -1.17 | 0.004 | -1.39 | 0.033 | -1.26 | 0.179 |
| 1455352_at   | expressed sequence AU023006                                             | AU023006      | 1.72  | 0.255 | 1.43  | 0.670 | -1.15 | 0.014 | -1.39 | 0.024 | -1.33 | 0.062 |
| 1449165_at   | calpain 5                                                               | Capn5         | -1.4  | 0.385 | -1.33 | 0.275 | 1.12  | 0.810 | -1.39 | 0.041 | 1.03  | 0.962 |
| 1437385_at   | collagen and calcium binding EGF domains 1                              | Ccbe1         | 1.06  | 0.906 | -2.99 | 0.186 | -1.86 | 0.045 | -1.39 | 0.045 | -1.92 | 0.106 |
| 1448001_x_at | cell division cycle associated 3                                        | Cdca3         | -1.25 | 0.288 | -1.51 | 0.258 | 1.22  | 0.898 | -1.39 | 0.031 | 1.02  | 0.893 |
| 1418071_s_at | chromodomain protein, Y chromosome-like                                 | Cdyl          | -1.05 | 0.426 | -1.37 | 0.034 | -1.27 | 0.080 | -1.39 | 0.004 | -1.39 | 0.022 |
| 1429028_at   | dedicator of cytokinesis 11                                             | Dock11        | -1.02 | 0.630 | -1.9  | 0.083 | -1.26 | 0.008 | -1.39 | 0.028 | -1.48 | 0.014 |
| 1424295_at   | developmental pluripotency-associated 3                                 | Dppa3         | 1.13  | 0.559 | 1.18  | 0.647 | 1.23  | 0.252 | -1.39 | 0.032 | 1.3   | 0.954 |
| 1442920_at   | Kruppel-like factor 3 (basic)                                           | Klf3          | 1.13  | 0.747 | -1.01 | 0.566 | 1.03  | 0.872 | -1.39 | 0.030 | -1.38 | 0.222 |
| 1455486_at   | protein inhibitor of activated STAT 1                                   | Pias1         | -1.07 | 0.593 | -1.49 | 0.191 | 1.53  | 0.415 | -1.39 | 0.008 | -1.3  | 0.177 |
| 1455149_at   | SH3 domain containing ring finger 1                                     | Sh3rf1        | -1.13 | 0.423 | -1.29 | 0.143 | -1.1  | 0.364 | -1.39 | 0.015 | -1.23 | 0.043 |
| 1428251_at   | SMC hinge domain containing 1                                           | Smchd1        | -1.11 | 0.464 | -1.52 | 0.067 | -1.19 | 0.040 | -1.39 | 0.035 | -1.33 | 0.015 |
| 1455309_at   | transmembrane protein 16F                                               | Tmem16f       | 1.27  | 0.404 | -1.31 | 0.185 | -1.51 | 0.070 | -1.39 | 0.019 | -1.56 | 0.007 |
| 1418926_at   | zinc finger homeobox 1a                                                 | Zfx1a         | 1.16  | 0.474 | -1.47 | 0.076 | -1.37 | 0.003 | -1.39 | 0.005 | -1.68 | 0.011 |
| 1454723_at   | RIKEN cDNA 1110033M05 gene                                              | 1110033M05Rik | 1.06  | 0.927 | -1.57 | 0.007 | -1.53 | 0.004 | -1.38 | 0.011 | -1.67 | 0.003 |
| 1456563_at   | RIKEN cDNA 4933429F08 gene                                              | 4933429F08Rik | -1.4  | 0.285 | -1.24 | 0.381 | -1.18 | 0.159 | -1.38 | 0.022 | 1.21  | 0.217 |
| 1434932_at   | adenosine deaminase, RNA-specific, B1                                   | Adarb1        | 1.56  | 0.599 | -3.87 | 0.025 | -2.05 | 0.044 | -1.38 | 0.002 | -1.34 | 0.323 |
| 1435594_at   | ADP-ribosylation factor-like 6 interacting protein 2                    | Arf6ip2       | 1.13  | 0.766 | 1.29  | 0.961 | -1.07 | 0.481 | -1.38 | 0.021 | 1.35  | 0.545 |
| 1436304_at   | RIKEN cDNA C030003D03 gene                                              | C030003D03Rik | -1.07 | 0.276 | -1.05 | 0.522 | -1.04 | 0.517 | -1.38 | 0.022 | -1.15 | 0.309 |
| 1432229_a_at | chromodomain protein, Y chromosome-like 2                               | Cdyl2         | 3.69  | 0.439 | 2.14  | 0.536 | 1.16  | 0.545 | -1.38 | 0.010 | -1.35 | 0.051 |
| 1451723_at   | CCR4-NOT transcription complex, subunit 6-like                          | Cnot6l        | 1.12  | 0.636 | -1.23 | 0.174 | -1.08 | 0.140 | -1.38 | 0.019 | -1.15 | 0.072 |
| 1436866_at   | ephrin A5                                                               | EfnA5         | -1.19 | 0.114 | -2.62 | 0.015 | 1.02  | 0.954 | -1.38 | 0.044 | -1.35 | 0.048 |
| 1425710_a_at | homer homolog 1 (Drosophila)                                            | Homer1        | 2.01  | 0.274 | -1.11 | 0.403 | -1.02 | 0.773 | -1.38 | 0.035 | -1.03 | 0.641 |

|              |                                                                                 |               |       |       |       |       |       |       |       |       |       |       |
|--------------|---------------------------------------------------------------------------------|---------------|-------|-------|-------|-------|-------|-------|-------|-------|-------|-------|
| 1448352_at   | leucine zipper protein 1                                                        | Luzp1         | -1.42 | 0.297 | -1.26 | 0.359 | -1.34 | 0.128 | -1.38 | 0.033 | 1.09  | 0.546 |
| 1425755_at   | mature T-cell proliferation 1                                                   | Mtcp1         | 1.11  | 0.839 | 1.16  | 0.764 | 1.01  | 0.656 | -1.38 | 0.020 | 1.02  | 0.970 |
| 1453271_at   | PHD finger protein 14                                                           | Phf14         | -1.26 | 0.345 | -1.82 | 0.180 | -1.18 | 0.130 | -1.38 | 0.004 | -1.54 | 0.019 |
| 1453163_at   | protein phosphatase 1, regulatory (inhibitor) subunit 12A                       | Ppp1r12a      | 1.66  | 0.346 | 1.21  | 0.570 | -1.33 | 0.056 | -1.38 | 0.045 | -1.78 | 0.050 |
| 1425060_s_at | restin (Reed-Steinberg cell-expressed intermediate filament-associated protein) | Rsn           | -1.09 | 0.467 | -1.43 | 0.127 | -1.24 | 0.232 | -1.38 | 0.028 | 1.01  | 0.655 |
| 1459903_at   | sema domain, immunoglobulin domain (Ig), and GPI membrane anchor, Sema7a        | Sema7a        | -1.21 | 0.128 | -1.85 | 0.049 | -1.35 | 0.013 | -1.38 | 0.018 | -1.41 | 0.005 |
| 1454284_at   | solute carrier family 25 (mitochondrial carrier, phosphate carrier), member 25  | Slc25a25      | 1.58  | 0.261 | 1.15  | 0.355 | 3.33  | 0.536 | -1.38 | 0.017 | 1.57  | 0.210 |
| 1416977_at   | signal transducing adaptor molecule (SH3 domain and ITAM motif) 2               | Stam2         | 1.03  | 0.857 | -1.14 | 0.495 | -1.01 | 0.855 | -1.38 | 0.049 | -1.54 | 0.050 |
| 1455042_at   | Transducin (beta)-like 1 X-linked                                               | Tbl1x         | 1.36  | 0.550 | -1.02 | 0.467 | -1.37 | 0.007 | -1.38 | 0.003 | -1.56 | 0.006 |
| 1432183_at   | transmembrane protein 116                                                       | Tmem116       | -1.14 | 0.065 | -1.05 | 0.727 | -1.04 | 0.482 | -1.38 | 0.004 | -1.25 | 0.120 |
| 1440424_at   | Troponin T2, cardiac                                                            | Tnnt2         | -1.15 | 0.329 | 1.87  | 0.364 | 1.04  | 0.566 | -1.38 | 0.007 | 1.15  | 0.859 |
| 1425388_a_at | thiamine pyrophosphokinase                                                      | Tpk1          | -1.26 | 0.057 | -2.32 | 0.003 | -1.05 | 0.558 | -1.38 | 0.032 | -1.32 | 0.042 |
| 1456946_at   | RIKEN cDNA 4831416G18 gene                                                      | 4831416G18Rik | 1.09  | 0.567 | -1.19 | 0.483 | 1.15  | 0.790 | -1.37 | 0.000 | -1.43 | 0.143 |
| 1443923_at   | A kinase (PRKA) anchor protein 13                                               | Akap13        | -1.06 | 0.575 | -1.31 | 0.322 | -1.47 | 0.078 | -1.37 | 0.006 | -1.19 | 0.159 |
| 1435879_at   | thymoma viral proto-oncogene 3                                                  | Akt3          | -1.12 | 0.272 | -2.7  | 0.030 | -1.51 | 0.004 | -1.37 | 0.010 | -1.65 | 0.005 |
| 1428369_s_at | Rho GTPase activating protein 21                                                | Arhgap21      | -1.03 | 0.670 | -1.19 | 0.179 | -1.22 | 0.000 | -1.37 | 0.006 | -1.3  | 0.002 |
| 1434951_at   | armadillo repeat containing 8                                                   | Armc8         | -1.02 | 0.544 | -1.19 | 0.364 | -1.18 | 0.329 | -1.37 | 0.007 | -1.34 | 0.138 |
| 1455164_at   | Cdc42 GTPase-activating protein                                                 | Cgagp         | 1.07  | 0.324 | -1.29 | 0.083 | -1.43 | 0.014 | -1.37 | 0.001 | -1.61 | 0.001 |
| 1447538_at   | CREB regulated transcription coactivator 1                                      | Crtc1         | 1.39  | 0.994 | 1.17  | 0.974 | 1.01  | 0.687 | -1.37 | 0.013 | -1.11 | 0.571 |
| 1458770_at   | DNA segment, Chr 11, ERATO Doi 4, expressed                                     | D11Ert4e      | 1.36  | 0.770 | 1.16  | 0.429 | 1.85  | 0.761 | -1.37 | 0.042 | 3.06  | 0.046 |
| 1452635_x_at | Josephin domain containing 3                                                    | Josd3         | -1.36 | 0.326 | -1.07 | 0.498 | 1.06  | 0.482 | -1.37 | 0.012 | 1.05  | 0.551 |
| 1426025_s_at | lysosomal-associated protein transmembrane 5                                    | Laptm5        | 1.19  | 0.691 | 1.36  | 0.721 | 1.07  | 0.898 | -1.37 | 0.016 | 1.19  | 0.174 |
| 1451982_at   | mitogen activated protein kinase kinase 4                                       | Map2k4        | 1.01  | 0.781 | -1.19 | 0.171 | -1.14 | 0.128 | -1.37 | 0.018 | -1.19 | 0.044 |
| 1457416_at   | Methionine aminopeptidase 2                                                     | Metap2        | -1.63 | 0.173 | -1.13 | 0.429 | 1.12  | 0.620 | -1.37 | 0.034 | -1.12 | 0.330 |
| 1457316_at   | microtubule-associated protein 6                                                | Mtap6         | -1.19 | 0.017 | -1.58 | 0.001 | -1.47 | 0.075 | -1.37 | 0.007 | -1.7  | 0.006 |
| 1434884_at   | Metadherin                                                                      | Mtdh          | -1.09 | 0.395 | -1.13 | 0.370 | -1.02 | 0.678 | -1.37 | 0.010 | -1.01 | 0.667 |
| 1453576_at   | Nipped-B homolog (Drosophila)                                                   | Nipbl         | -1.14 | 0.425 | -1.55 | 0.287 | -1.43 | 0.009 | -1.37 | 0.010 | -1.35 | 0.108 |
| 1460615_at   | 5'-nucleotidase domain containing 1                                             | Nt5dc1        | 1     | 0.918 | -1.66 | 0.006 | -1.19 | 0.023 | -1.37 | 0.023 | -1.66 | 0.014 |
| 1433694_at   | phosphodiesterase 3B, cGMP-inhibited                                            | Pde3b         | -1.46 | 0.265 | -2.6  | 0.104 | -1.02 | 0.696 | -1.37 | 0.019 | 1.15  | 0.784 |
| 1434924_at   | PHD finger protein 2                                                            | Phf2          | -1    | 0.883 | -1.25 | 0.030 | 1.09  | 0.060 | -1.37 | 0.015 | -1.22 | 0.211 |
| 1454862_at   | pleckstrin homology-like domain, family B, member 2                             | Phldb2        | -1.06 | 0.576 | -1.35 | 0.115 | -1.23 | 0.048 | -1.37 | 0.008 | -1.37 | 0.011 |
| 1456261_at   | SH3-domain kinase binding protein 1                                             | Sh3kbp1       | -1.15 | 0.333 | -1.67 | 0.057 | -1.26 | 0.012 | -1.37 | 0.040 | -1.29 | 0.049 |
| 1436892_at   | sprouty-related, EVH1 domain containing 2                                       | Spred2        | 1.13  | 0.527 | 1.27  | 0.472 | -1.13 | 0.265 | -1.37 | 0.005 | 1.2   | 0.026 |
| 1451332_at   | zinc finger protein 521                                                         | Zfp521        | -1.06 | 0.376 | -3.24 | 0.019 | -1.62 | 0.003 | -1.37 | 0.009 | -1.77 | 0.001 |
| 1460455_at   | RIKEN cDNA 1110059H15 gene                                                      | 1110059H15Rik | -1.06 | 0.452 | -1.27 | 0.011 | -1.02 | 0.546 | -1.36 | 0.020 | -1.39 | 0.084 |
| 1447913_x_at | A kinase (PRKA) anchor protein (yotiao) 9                                       | Akap9         | 1.52  | 0.526 | -1.39 | 0.070 | -1.31 | 0.200 | -1.36 | 0.041 | -1.12 | 0.632 |
| 1437633_at   | ankyrin repeat domain 11                                                        | Ankrd11       | 1.04  | 0.397 | -1.1  | 0.339 | -1.82 | 0.025 | -1.36 | 0.016 | -1.4  | 0.046 |
| 1454763_at   | ankyrin repeat domain 17                                                        | Ankrd17       | 1.59  | 0.304 | 1.63  | 0.542 | -1.28 | 0.004 | -1.36 | 0.005 | -1.46 | 0.001 |
| 1435108_at   | Rho GTPase activating protein 22                                                | Arhgap22      | -1.69 | 0.084 | -1.09 | 0.760 | 1.98  | 0.249 | -1.36 | 0.006 | 2.29  | 0.420 |
| 1441572_at   | RIKEN cDNA C030036D22 gene                                                      | C030036D22Rik | 1.18  | 0.111 | 1.06  | 0.898 | -1.6  | 0.117 | -1.36 | 0.042 | 1.02  | 0.878 |
| 1455467_at   | RIKEN cDNA C330043M08 gene                                                      | C330043M08Rik | 1.44  | 0.874 | 1.23  | 0.308 | -1.11 | 0.516 | -1.36 | 0.003 | 1.35  | 0.634 |
| 1443486_at   | Component of oligomeric golgi complex 7                                         | Cog7          | -1.56 | 0.173 | -1.95 | 0.100 | 1.28  | 0.809 | -1.36 | 0.026 | 1.06  | 0.243 |
| 1420384_at   | procollagen, type IV, alpha 3 (Goodpasture antigen) binding protein             | Col4a3bp      | -1.16 | 0.339 | -1.26 | 0.104 | -1.22 | 0.106 | -1.36 | 0.017 | -1.22 | 0.036 |
| 1419935_s_at | casein kinase 2, alpha prime polypeptide                                        | Csnk2a2       | -1.03 | 0.461 | 1.07  | 0.391 | -1.19 | 0.109 | -1.36 | 0.001 | -1.01 | 0.769 |
| 1452220_at   | dedicator of cyto-kinesis 1                                                     | Dock1         | -1    | 0.781 | -1.98 | 0.022 | -1.39 | 0.024 | -1.36 | 0.017 | -1.61 | 0.008 |
| 1455057_at   | guanine monophosphate synthetase                                                | Gmps          | 1.03  | 0.885 | -1.09 | 0.072 | -1.17 | 0.168 | -1.36 | 0.025 | -1.25 | 0.008 |
| 1425589_at   | hydroxysteroid (17-beta) dehydrogenase 13                                       | Hsd17b13      | 1.99  | 0.847 | 1.52  | 0.959 | 1.15  | 0.587 | -1.36 | 0.032 | 1.85  | 0.774 |
| 1453126_at   | leucine rich repeat and fibronectin type III domain containing 2                | Lrn2          | -1.1  | 0.804 | -1.25 | 0.325 | 1.35  | 0.141 | -1.36 | 0.038 | 1.35  | 0.754 |
| 1434179_at   | myeloid/lymphoid or mixed-lineage leukemia 3                                    | Mll3          | -1.06 | 0.375 | -2.61 | 0.014 | -1.32 | 0.046 | -1.36 | 0.017 | -1.88 | 0.009 |
| 1436502_at   | mitochondrial tumor suppressor 1                                                | Mtss1         | 1.34  | 0.921 | -1.14 | 0.255 | 1.16  | 0.428 | -1.36 | 0.031 | -1.03 | 0.756 |
| 1454851_at   | nuclear receptor subfamily 2, group C, member 2                                 | Nr2c2         | -1.13 | 0.161 | -1.36 | 0.021 | -1.22 | 0.096 | -1.36 | 0.014 | -1.3  | 0.001 |
| 1426933_at   | oxidative-stress responsive 1                                                   | Oxsr1         | -1.02 | 0.538 | -1.36 | 0.164 | -1.06 | 0.748 | -1.36 | 0.011 | -1.14 | 0.286 |
| 1452788_at   | protein phosphatase 2, regulatory subunit B (B56), epsilon isoform              | Ppp2r5e       | 3.82  | 0.240 | 3.44  | 0.799 | -1.32 | 0.049 | -1.36 | 0.045 | -1.61 | 0.012 |
| 1432057_a_at | PR domain containing 5                                                          | Prdm5         | 1.02  | 0.684 | -1.34 | 0.097 | -1.33 | 0.003 | -1.36 | 0.023 | -1.27 | 0.031 |
| 1417400_at   | retinoic acid induced 14                                                        | Rai14         | -1.08 | 0.204 | -1.69 | 0.008 | -1.32 | 0.013 | -1.36 | 0.016 | -1.5  | 0.014 |
| 1424084_at   | ROD1 regulator of differentiation 1 (S. pombe)                                  | Rod1          | 1.03  | 0.487 | -1.08 | 0.157 | -1.11 | 0.215 | -1.36 | 0.011 | -1.07 | 0.868 |
| 1423881_at   | SAPS domain family, member 3                                                    | Saps3         | 1.12  | 0.554 | -1.1  | 0.525 | -1.29 | 0.022 | -1.36 | 0.033 | -1.43 | 0.001 |
| 1460735_at   | supervillin                                                                     | Svil          | 1.1   | 0.774 | -1.41 | 0.101 | -1.25 | 0.026 | -1.36 | 0.005 | -1.43 | 0.003 |

|              |                                                                        |                    |       |       |       |       |       |       |       |       |       |       |
|--------------|------------------------------------------------------------------------|--------------------|-------|-------|-------|-------|-------|-------|-------|-------|-------|-------|
| 1439766_x_at | vascular endothelial growth factor C                                   | Vegfc              | -1.42 | 0.265 | -1.47 | 0.256 | 1.18  | 0.466 | -1.36 | 0.017 | -1.16 | 0.160 |
| 1453593_at   | RIKEN cDNA 1700110N18 gene                                             | 1700110N18Rik      | -1.08 | 0.317 | -1.28 | 0.001 | -1.19 | 0.048 | -1.35 | 0.006 | -1.27 | 0.005 |
| 1428696_at   | RIKEN cDNA 2310015N21 gene                                             | 2310015N21Rik      | -1.2  | 0.056 | -2.17 | 0.001 | -1.14 | 0.075 | -1.35 | 0.034 | -1.45 | 0.021 |
| 1445896_at   | RIKEN cDNA 2810433D01 gene                                             | 2810433D01Rik      | 1.2   | 0.749 | 1.27  | 0.999 | -1.5  | 0.238 | -1.35 | 0.039 | 3.52  | 0.016 |
| 1453543_at   | RIKEN cDNA 4930556H04 gene                                             | 4930556H04Rik      | -1.38 | 0.281 | 1.39  | 0.462 | 1.43  | 0.849 | -1.35 | 0.004 | -1.31 | 0.186 |
| 1447465_at   | RIKEN cDNA 4930558N01 gene                                             | 4930558N01Rik      | 1.35  | 0.478 | 1.33  | 0.436 | -1.05 | 0.449 | -1.35 | 0.042 | -1.34 | 0.168 |
| 1434797_at   | RIKEN cDNA 6720469N11 gene                                             | 6720469N11Rik      | -1.03 | 0.586 | -1.26 | 0.044 | -1.28 | 0.066 | -1.35 | 0.003 | -1.32 | 0.010 |
| 1432681_at   | RIKEN cDNA 9130009M17 gene                                             | 9130009M17Rik      | -1.13 | 0.330 | 1.31  | 0.216 | -1.29 | 0.328 | -1.35 | 0.046 | -1.33 | 0.180 |
| 1427692_a_at | calcium/calmodulin-dependent serine protein kinase (MAGUK family)      | Cask               | 2.84  | 0.743 | 1.5   | 0.203 | -1.41 | 0.021 | -1.35 | 0.045 | -1.65 | 0.090 |
| 1455072_at   | centrosomal protein 350                                                | Cep350             | 1.06  | 0.133 | -1.25 | 0.005 | -1.13 | 0.185 | -1.35 | 0.023 | -1.46 | 0.008 |
| 1423271_at   | gap junction membrane channel protein beta 2                           | Gjb2               | -1.17 | 0.069 | -1.79 | 0.017 | -1.29 | 0.089 | -1.35 | 0.003 | -1.46 | 0.013 |
| 1450050_at   | histone cell cycle regulation defective homolog A (S. cerevisiae)      | Hira               | 1.49  | 0.115 | 1.25  | 0.338 | -1.32 | 0.293 | -1.35 | 0.046 | -1.66 | 0.070 |
| 1435490_at   | hexokinase 3                                                           | Hk3                | -1.32 | 0.694 | 1.59  | 0.226 | 1.23  | 0.620 | -1.35 | 0.044 | -1.45 | 0.249 |
| 1449328_at   | lymphocyte antigen 75                                                  | Ly75               | -1.37 | 0.126 | -1.34 | 0.250 | 1.06  | 0.940 | -1.35 | 0.016 | -1.05 | 0.661 |
| 1416092_a_at | microtubule-associated protein 4                                       | Mtap4              | 1.18  | 0.617 | -1.29 | 0.091 | -1.34 | 0.044 | -1.35 | 0.016 | -1.44 | 0.031 |
| 1448944_at   | neuropilin 1                                                           | Nrp1               | 1.21  | 0.393 | -1.23 | 0.355 | -1.52 | 0.018 | -1.35 | 0.011 | -1.54 | 0.017 |
| 1457225_at   | olfactory receptor 288                                                 | Olfir288           | 1.15  | 0.839 | 2.08  | 0.143 | 1.86  | 0.090 | -1.35 | 0.031 | 1.06  | 0.983 |
| 1452759_s_at | PTPRF interacting protein, binding protein 1 (liprin beta 1)           | PTPfbp1            | -1.04 | 0.586 | -1.17 | 0.059 | -1.29 | 0.099 | -1.35 | 0.021 | -1.38 | 0.055 |
| 1448020_at   | RAS-related protein-1a                                                 | Rap1a              | -1.02 | 0.635 | -1.18 | 0.368 | -1.19 | 0.022 | -1.35 | 0.033 | -1.17 | 0.081 |
| 1434509_at   | Rap guanine nucleotide exchange factor (GEF) 6                         | Rapgef6            | -1.05 | 0.564 | -1.57 | 0.000 | -1.21 | 0.025 | -1.35 | 0.011 | -1.4  | 0.008 |
| 1428657_at   | ras responsive element binding protein 1                               | Rreb1              | -1.02 | 0.655 | -1.05 | 0.581 | -1.11 | 0.080 | -1.35 | 0.004 | -1.11 | 0.020 |
| 1439515_at   | SET domain containing 5                                                | Setd5              | 1.14  | 0.469 | -1.3  | 0.053 | -1.4  | 0.014 | -1.35 | 0.025 | -1.51 | 0.037 |
| 1458803_at   | schlafen 9 /// similar to schlafen 9                                   | Slf9 /// LOC677619 | -1.13 | 0.681 | -1.17 | 0.373 | -1.01 | 0.990 | -1.35 | 0.019 | -1.02 | 0.870 |
| 1437155_a_at | VW domain containing transcription regulator 1                         | Wwtr1              | -1.05 | 0.470 | -1.46 | 0.005 | -1.38 | 0.007 | -1.35 | 0.023 | -1.25 | 0.001 |
| 1455483_at   | zinc finger protein 148                                                | Zfp148             | -1.2  | 0.337 | -1.25 | 0.299 | -1.19 | 0.023 | -1.35 | 0.002 | -1.35 | 0.023 |
| 1429089_s_at | RIKEN cDNA 2900026A02 gene                                             | 2900026A02Rik      | -1.14 | 0.108 | -1.88 | 0.018 | -1.47 | 0.007 | -1.34 | 0.010 | -1.52 | 0.001 |
| 1433151_at   | RIKEN cDNA 4933415B22 gene                                             | 4933415B22Rik      | 1.03  | 0.876 | 1.22  | 0.715 | 1.16  | 0.619 | -1.34 | 0.047 | 1.66  | 0.243 |
| 1442098_at   | expressed sequence AU022434                                            | AU022434           | -1.31 | 0.291 | -1.84 | 0.077 | -1.15 | 0.369 | -1.34 | 0.043 | 1.06  | 0.986 |
| 1460439_at   | cDNA sequence BC033915                                                 | BC033915           | -1.07 | 0.605 | -1.95 | 0.001 | -1.44 | 0.017 | -1.34 | 0.010 | -1.49 | 0.044 |
| 1447608_x_at | BTB (POZ) domain containing 14A                                        | Btb14a             | -1.1  | 0.250 | -1.17 | 0.519 | 1.58  | 0.575 | -1.34 | 0.032 | 1.15  | 0.586 |
| 1445843_at   | chromodomain helicase DNA binding protein 2                            | Chd2               | -1.25 | 0.315 | -1.33 | 0.313 | -1.53 | 0.022 | -1.34 | 0.028 | -1.17 | 0.454 |
| 1457424_at   | Eyes absent 1 homolog (Drosophila)                                     | Eya1               | -1.29 | 0.132 | -1.94 | 0.087 | 1.12  | 0.802 | -1.34 | 0.018 | 1.25  | 0.584 |
| 1442453_at   | FCH domain only 2                                                      | Fcho2              | 1.33  | 0.106 | 1.49  | 0.264 | 1.23  | 0.776 | -1.34 | 0.023 | -1.24 | 0.216 |
| 1455242_at   | forkhead box P1                                                        | Foxp1              | 1.35  | 0.401 | 1.08  | 0.560 | -1.22 | 0.027 | -1.34 | 0.009 | -1.36 | 0.003 |
| 1449099_at   | LPS-responsive beige-like anchor                                       | Lrba               | -1.14 | 0.097 | -1.5  | 0.013 | -1.21 | 0.075 | -1.34 | 0.014 | -1.32 | 0.065 |
| 1425510_at   | MAP/microtubule affinity-regulating kinase 1                           | Mark1              | 2.03  | 0.981 | 2.13  | 0.881 | 1.05  | 0.846 | -1.34 | 0.005 | -1.46 | 0.084 |
| 1448989_a_at | myosin IB                                                              | Myo1b              | 1.07  | 0.968 | -1.39 | 0.071 | -1.29 | 0.029 | -1.34 | 0.005 | -1.5  | 0.000 |
| 1432592_at   | pregnancy-associated plasma protein A                                  | Pappa              | -1.12 | 0.352 | -1.62 | 0.022 | -1.72 | 0.052 | -1.34 | 0.015 | -1.58 | 0.006 |
| 1449404_at   | phosphatidylinositol-4-phosphate 5-kinase, type II, alpha              | Pip5k2a            | -1.2  | 0.260 | -2.02 | 0.055 | -1.26 | 0.008 | -1.34 | 0.003 | -1.37 | 0.006 |
| 1451618_at   | rhodopsin                                                              | Rho                | -1.05 | 0.537 | 1     | 0.586 | -1.19 | 0.123 | -1.34 | 0.044 | 1.07  | 0.819 |
| 1423776_s_at | TBC1 domain family, member 22a                                         | Tbc1d22a           | -1.19 | 0.292 | -2.65 | 0.057 | -1.3  | 0.138 | -1.34 | 0.012 | -2.03 | 0.001 |
| 1458963_at   | RIKEN cDNA 1810054D07 gene                                             | 1810054D07Rik      | 1.04  | 0.788 | -1.12 | 0.356 | -1.19 | 0.018 | -1.33 | 0.012 | -1.4  | 0.006 |
| 1437041_at   | RIKEN cDNA 5730406M06 gene                                             | 5730406M06Rik      | 1.35  | 0.251 | -1.01 | 0.386 | 1.05  | 0.781 | -1.33 | 0.038 | -1.26 | 0.075 |
| 1442063_at   | RIKEN cDNA 5930437A14 gene                                             | 5930437A14Rik      | -1.09 | 0.220 | -1.31 | 0.157 | -1.23 | 0.181 | -1.33 | 0.029 | -1.7  | 0.008 |
| 1455342_at   | RIKEN cDNA A230083H22 gene                                             | A230083H22Rik      | 1.05  | 0.887 | -1.13 | 0.295 | -1.03 | 0.467 | -1.33 | 0.044 | -1.34 | 0.147 |
| 1450915_at   | adaptor-related protein complex 3, beta 1 subunit                      | Ap3b1              | 1.11  | 0.514 | -1.29 | 0.107 | -1.33 | 0.032 | -1.33 | 0.047 | -1.35 | 0.012 |
| 1447606_x_at | aquaporin 11                                                           | Aqp11              | 1.02  | 0.808 | 1.17  | 0.908 | 1.33  | 0.846 | -1.33 | 0.045 | -1.2  | 0.622 |
| 1449709_s_at | arginine-tRNA-protein transferase 1                                    | Atf1               | 1.07  | 0.569 | -1.22 | 0.145 | -1.29 | 0.031 | -1.33 | 0.026 | -1.51 | 0.004 |
| 1439948_at   | cDNA sequence BC046401                                                 | BC046401           | 1.15  | 0.521 | 1.17  | 0.954 | 1.39  | 0.783 | -1.33 | 0.010 | -1    | 0.434 |
| 1456505_at   | Braf transforming gene                                                 | Braf               | 1.48  | 0.850 | 1.26  | 0.628 | -1.16 | 0.364 | -1.33 | 0.030 | -1.24 | 0.191 |
| 1451447_at   | CUE domain containing 1                                                | Cuedc1             | -1.32 | 0.086 | -1.29 | 0.276 | -1.09 | 0.453 | -1.33 | 0.008 | -1.12 | 0.376 |
| 1437141_x_at | dymeclin                                                               | Dym                | -1.28 | 0.361 | -1.51 | 0.276 | -1.14 | 0.135 | -1.33 | 0.003 | -1.15 | 0.240 |
| 1418349_at   | heparin-binding EGF-like growth factor                                 | Hbegf              | -1.05 | 0.581 | -1.44 | 0.006 | -1.22 | 0.029 | -1.33 | 0.036 | -1.22 | 0.025 |
| 1449242_s_at | histidine-rich glycoprotein                                            | Hrg                | -1.01 | 0.800 | 1.72  | 0.248 | -1.05 | 0.397 | -1.33 | 0.030 | 1.25  | 0.310 |
| 1439582_at   | Microtubule-actin crosslinking factor 1                                | Macf1              | -1.23 | 0.360 | -1.43 | 0.219 | -1.02 | 0.680 | -1.33 | 0.002 | 1.1   | 0.606 |
| 1420870_at   | myeloid/lymphoid or mixed lineage-leukemia translocation to 10 homolog | Mllt10             | 1.12  | 0.303 | -1    | 0.933 | -1.26 | 0.070 | -1.33 | 0.017 | -1.79 | 0.002 |
| 1437295_at   | protein kinase N2                                                      | Pkn2               | 1.19  | 0.183 | -1.04 | 0.510 | -1.27 | 0.024 | -1.33 | 0.016 | -1.32 | 0.021 |
| 1448502_at   | solute carrier family 16 (monocarboxylic acid transporters), member 7  | Slc16a7            | 1.09  | 0.904 | -1.26 | 0.152 | -1.15 | 0.118 | -1.33 | 0.006 | -1.83 | 0.085 |

|              |                                                                                              |                    |       |       |       |       |       |       |       |       |       |       |
|--------------|----------------------------------------------------------------------------------------------|--------------------|-------|-------|-------|-------|-------|-------|-------|-------|-------|-------|
| 1450916_at   | staufen (RNA binding protein) homolog 2 (Drosophila)                                         | Stau2              | 1.04  | 0.892 | -1.99 | 0.050 | -1.28 | 0.043 | -1.33 | 0.018 | -1.35 | 0.016 |
| 1429428_at   | transcription factor 7-like 2, T-cell specific, HMG-box                                      | Tcf7l2             | -1.03 | 0.449 | -1.67 | 0.017 | 1.01  | 0.619 | -1.33 | 0.005 | -1.26 | 0.029 |
| 1435235_at   | thioredoxin-like 1                                                                           | Txn1l              | -1.11 | 0.492 | -1.24 | 0.320 | -1.25 | 0.002 | -1.33 | 0.006 | -1.21 | 0.107 |
| 1443924_at   | WNK lysine deficient protein kinase 3                                                        | Wnk3               | -1.21 | 0.252 | -2.2  | 0.017 | 1.41  | 0.251 | -1.33 | 0.042 | -1    | 0.650 |
| 1430012_at   | RIKEN cDNA 1110050K14 gene                                                                   | 1110050K14Rik      | 2.21  | 0.396 | -1.08 | 0.376 | 1.78  | 0.245 | -1.32 | 0.019 | 1.18  | 0.249 |
| 1428539_at   | RIKEN cDNA 2610207I05 gene                                                                   | 2610207I05Rik      | 1.09  | 0.768 | -1.01 | 0.722 | -1.15 | 0.167 | -1.32 | 0.023 | -1.43 | 0.008 |
| 1430252_at   | RIKEN cDNA 3110027N22 gene                                                                   | 3110027N22Rik      | -1.21 | 0.357 | -1.59 | 0.244 | -1.33 | 0.152 | -1.32 | 0.027 | -1.41 | 0.100 |
| 1431158_at   | RIKEN cDNA 8430406H22 gene                                                                   | 8430406H22Rik      | 1.16  | 0.682 | 1.05  | 0.772 | 1.03  | 0.955 | -1.32 | 0.045 | 1.12  | 0.662 |
| 1456634_at   | RIKEN cDNA 9830001H06 gene                                                                   | 9830001H06Rik      | 1.22  | 0.912 | 1.28  | 0.954 | -1.34 | 0.012 | -1.32 | 0.042 | -1.04 | 0.704 |
| 1429140_at   | RIKEN cDNA 9830002I17 gene                                                                   | 9830002I17Rik      | -1.24 | 0.260 | 1.03  | 0.848 | -1.08 | 0.605 | -1.32 | 0.024 | 1.39  | 0.753 |
| 1437216_at   | RIKEN cDNA A430106J12 gene                                                                   | A430106J12Rik      | 1.11  | 0.222 | -1.3  | 0.181 | -1.35 | 0.021 | -1.32 | 0.037 | -1.7  | 0.043 |
| 1440838_at   | Expressed sequence AI852064                                                                  | AI852064           | 2.22  | 0.643 | 1.36  | 0.440 | -1.12 | 0.556 | -1.32 | 0.013 | -1.19 | 0.063 |
| 1419939_at   | Rho guanine nucleotide exchange factor (GEF) 17                                              | Arhgef17           | 1.05  | 0.633 | 1.11  | 0.746 | 1.4   | 0.228 | -1.32 | 0.019 | 1.12  | 0.312 |
| 1427482_a_at | carbonic anhydrase 8 /// similar to Carbonic anhydrase-related protein (C Car8 /// LOC676792 | Car8               | -1.02 | 0.538 | -1.8  | 0.070 | -1.19 | 0.157 | -1.32 | 0.027 | -1.03 | 0.845 |
| 1457672_at   | chromodomain helicase DNA binding protein 9                                                  | Chd9               | -1.09 | 0.413 | -1.51 | 0.090 | -1.5  | 0.003 | -1.32 | 0.026 | -1.71 | 0.031 |
| 1460576_at   | exocyst complex component 6                                                                  | Exoc6              | -1.34 | 0.352 | -3.53 | 0.194 | 1.01  | 0.709 | -1.32 | 0.020 | 1.25  | 0.512 |
| 1452232_at   | UDP-N-acetyl-alpha-D-galactosamine: polypeptide N-acetylgalactosamin                         | Galnt7             | 1.04  | 0.812 | -1.74 | 0.002 | -1.08 | 0.276 | -1.32 | 0.003 | -1.19 | 0.069 |
| 1434009_at   | glucocorticoid receptor DNA binding factor 1                                                 | Grif1              | -1    | 0.676 | -1.17 | 0.031 | -1.03 | 0.623 | -1.32 | 0.001 | -1.22 | 0.141 |
| 1419302_at   | hairly/enhancer-of-split related with YRPW motif-like                                        | Heyl               | 1.08  | 0.567 | -1.19 | 0.399 | -1.23 | 0.153 | -1.32 | 0.005 | -1.2  | 0.170 |
| 1428787_at   | NCK associated protein 1 like                                                                | Nckap1l            | 1.23  | 0.993 | -1.03 | 0.438 | -1.23 | 0.270 | -1.32 | 0.021 | 1.5   | 0.691 |
| 1438684_at   | NUAK family, SNF1-like kinase, 1                                                             | Nuak1              | -1.22 | 0.248 | -1.41 | 0.152 | -1.3  | 0.006 | -1.32 | 0.030 | -1.4  | 0.010 |
| 1425824_a_at | proprotein convertase subtilisin/kexin type 4                                                | Pcsk4              | -1.22 | 0.369 | 1.18  | 0.967 | -1.05 | 0.570 | -1.32 | 0.003 | 1.18  | 0.155 |
| 1450819_at   | poliovirus receptor-related 1                                                                | Pvr1l              | 1.29  | 0.687 | 1.27  | 0.662 | -1.2  | 0.324 | -1.32 | 0.013 | -1.19 | 0.235 |
| 1427017_at   | special AT-rich sequence binding protein 2                                                   | Satb2              | 1.49  | 0.412 | -1.21 | 0.243 | -1.32 | 0.181 | -1.32 | 0.003 | -1.81 | 0.037 |
| 1434261_at   | signal-induced proliferation-associated 1 like 2                                             | Sipa1l2            | 1.02  | 0.688 | -1.38 | 0.041 | -1.2  | 0.014 | -1.32 | 0.011 | -1.47 | 0.002 |
| 1438147_at   | scavenger receptor cysteine rich domain containing, group B (4 domains                       | Srcrb4d            | -1.33 | 0.336 | -1.45 | 0.292 | 1.09  | 0.740 | -1.32 | 0.027 | 1.07  | 0.548 |
| 1452604_at   | serologically defined colon cancer antigen 13                                                | Stard13            | 1.63  | 0.499 | 1.52  | 0.528 | -1.31 | 0.030 | -1.32 | 0.029 | -1.52 | 0.014 |
| 1430535_at   | TSC22 domain family 2                                                                        | Tsc22d2            | 1.02  | 0.986 | -1.31 | 0.060 | -1.23 | 0.021 | -1.32 | 0.000 | -1.31 | 0.000 |
| 1452964_at   | tubulin tyrosine ligase-like family, member 11                                               | Ttl11              | -1.15 | 0.202 | -1.93 | 0.021 | -1.29 | 0.046 | -1.32 | 0.017 | -1.55 | 0.032 |
| 1439302_at   | ubiquitin-activating enzyme E1-like 2                                                        | Ube1l2             | -1.06 | 0.526 | -1.57 | 0.038 | -1.49 | 0.015 | -1.32 | 0.003 | -1.47 | 0.018 |
| 1434184_s_at | RIKEN cDNA 9430080K19 gene                                                                   | 9430080K19Rik      | 1.1   | 0.319 | -1.13 | 0.137 | -1.23 | 0.048 | -1.31 | 0.000 | -1.35 | 0.007 |
| 1455059_at   | RIKEN cDNA 9430093I07 gene                                                                   | 9430093I07Rik      | 1.42  | 0.217 | 1.12  | 0.980 | -1.12 | 0.069 | -1.31 | 0.044 | -1.09 | 0.431 |
| 1456790_at   | EST AA407452                                                                                 | AA407452           | 1.09  | 0.487 | 1.04  | 0.660 | 1.05  | 0.645 | -1.31 | 0.025 | 1.07  | 0.698 |
| 1442132_at   | CDNA sequence BC057552                                                                       | BC057552           | 1.35  | 0.703 | 1.24  | 0.770 | 1.69  | 0.413 | -1.31 | 0.012 | 1.21  | 0.535 |
| 1441137_at   | bicaudal C homolog 1 (Drosophila)                                                            | Bicc1              | 1.08  | 0.730 | -1.49 | 0.057 | -1.23 | 0.003 | -1.31 | 0.006 | -1.35 | 0.043 |
| 1427973_s_at | Vcell division cycle 73, Paf1/RNA polymerase II complex component, ho                        | Cdc73              | 1.75  | 0.011 | 1.46  | 0.127 | -1.3  | 0.097 | -1.31 | 0.023 | -1.2  | 0.210 |
| 1439824_at   | choroideremia                                                                                | Chm                | -1.15 | 0.410 | -1.43 | 0.180 | -1.09 | 0.103 | -1.31 | 0.011 | -1.19 | 0.209 |
| 1430936_at   | CHMP family, member 7                                                                        | Chmp7              | 1.14  | 0.982 | 2.08  | 0.449 | 2.57  | 0.460 | -1.31 | 0.009 | 1.09  | 0.622 |
| 1440657_at   | Contactin 3                                                                                  | Cntn3              | -1.2  | 0.326 | -1.3  | 0.199 | 1.25  | 0.968 | -1.31 | 0.009 | 1.06  | 0.875 |
| 1430676_at   | procollagen, type XIX, alpha 1                                                               | Col19a1            | 1.31  | 0.947 | 1.29  | 0.739 | 2.51  | 0.358 | -1.31 | 0.032 | 1.06  | 0.835 |
| 1426153_a_at | desmoglein 2                                                                                 | Dsg2               | -1.19 | 0.220 | 1.38  | 0.177 | -1.17 | 0.267 | -1.31 | 0.048 | 1.01  | 0.763 |
| 1451924_a_at | endothelin 1                                                                                 | Edn1               | -1.27 | 0.204 | -1.45 | 0.075 | -1.9  | 0.053 | -1.31 | 0.046 | -1.29 | 0.103 |
| 1421299_a_at | lymphoid enhancer binding factor 1                                                           | Lef1               | 1.15  | 0.357 | -1.52 | 0.101 | -1.5  | 0.090 | -1.31 | 0.040 | -1.08 | 0.217 |
| 1434185_at   | similar to acetyl-coenzyme A carboxylase alpha                                               | LOC672245          | -1.15 | 0.293 | -1.61 | 0.062 | -1.13 | 0.007 | -1.31 | 0.029 | -1.25 | 0.021 |
| 1452320_at   | low density lipoprotein receptor-related protein 2                                           | Lrp2               | -1.27 | 0.022 | -1.36 | 0.144 | -1.41 | 0.027 | -1.31 | 0.000 | -1.13 | 0.148 |
| 1451318_a_at | Yamaguchi sarcoma viral (v-yes-1) oncogene homolog /// similar to Yam                        | Lyn /// LOC676654  | -1.11 | 0.448 | -1.52 | 0.241 | -1.15 | 0.098 | -1.31 | 0.033 | -1.11 | 0.246 |
| 1452347_at   | myocyte enhancer factor 2A                                                                   | Mef2a              | 1.53  | 0.466 | 1.1   | 0.619 | -1.32 | 0.082 | -1.31 | 0.010 | -1.46 | 0.030 |
| 1453622_s_at | myeloid/lymphoid or mixed lineage-leukemia translocation to 3 homolog                        | Mllt3              | 1.25  | 0.845 | 1.05  | 0.333 | 1.06  | 0.768 | -1.31 | 0.029 | -1.67 | 0.162 |
| 1418031_at   | myosin IXb                                                                                   | Myo9b              | 1     | 0.730 | -1.32 | 0.226 | -1.21 | 0.114 | -1.31 | 0.004 | -1.18 | 0.136 |
| 1446429_at   | purinergic receptor P2X, ligand-gated ion channel 4                                          | P2rx4              | 1.45  | 0.755 | -1.1  | 0.405 | -1.12 | 0.555 | -1.31 | 0.032 | 1.01  | 0.744 |
| 1460729_at   | Rho-associated coiled-coil containing protein kinase 1                                       | Rock1              | -1.01 | 0.911 | -1.18 | 0.118 | -1.05 | 0.413 | -1.31 | 0.006 | -1.34 | 0.017 |
| 1437246_x_at | ribosomal protein S6 /// similar to 40S ribosomal protein S6 /// similar to                  | Rps6 /// LOC21473E | -1.31 | 0.044 | -1.06 | 0.527 | 1.17  | 0.162 | -1.31 | 0.046 | 1.14  | 0.200 |
| 1427096_s_at | signal sequence receptor, delta                                                              | Ssr4               | 1.5   | 0.388 | 1.46  | 0.723 | 1.31  | 0.051 | -1.31 | 0.003 | 1.4   | 0.629 |
| 1419181_at   | zinc finger protein 326                                                                      | Zfp326             | -1.09 | 0.387 | -1.12 | 0.105 | -1.05 | 0.369 | -1.31 | 0.023 | -1.38 | 0.044 |
| 1456789_at   | Zinc finger protein 462                                                                      | Zfp462             | -1.03 | 0.620 | -1.39 | 0.150 | -1.15 | 0.256 | -1.31 | 0.004 | -1.17 | 0.101 |
| 1455732_at   | RIKEN cDNA 1700025G04 gene                                                                   | 1700025G04Rik      | -1.08 | 0.148 | -2.2  | 0.012 | -1.16 | 0.020 | -1.3  | 0.045 | -1.5  | 0.016 |
| 1459879_at   | RIKEN cDNA 4921513D23 gene                                                                   | 4921513D23Rik      | 1.09  | 0.764 | 1     | 0.897 | 1.04  | 0.926 | -1.3  | 0.039 | -1.09 | 0.479 |
| 1428413_at   | RIKEN cDNA 5730405I09 gene                                                                   | 5730405I09Rik      | -1.18 | 0.391 | -1.33 | 0.314 | -1.23 | 0.006 | -1.3  | 0.005 | -1.15 | 0.118 |

|              |                                                                                                   |               |       |       |       |       |       |       |       |       |       |       |
|--------------|---------------------------------------------------------------------------------------------------|---------------|-------|-------|-------|-------|-------|-------|-------|-------|-------|-------|
| 1446586_at   | RIKEN cDNA 8030463A06 gene                                                                        | 8030463A06Rik | 1.84  | 0.291 | 1.44  | 0.760 | 1.51  | 0.206 | -1.3  | 0.040 | -1.75 | 0.122 |
| 1436795_at   | RIKEN cDNA 9630058J23 gene                                                                        | 9630058J23Rik | -1.06 | 0.233 | -1.3  | 0.065 | -1.04 | 0.569 | -1.3  | 0.005 | -1.3  | 0.001 |
| 1423177_a_at | abl-interactor 1                                                                                  | Abi1          | 1.17  | 0.508 | 1.04  | 0.806 | -1.12 | 0.161 | -1.3  | 0.002 | -1.27 | 0.005 |
| 1440668_at   | ADAMTS-like 3                                                                                     | Adamtsl3      | -1.07 | 0.730 | -1.19 | 0.061 | -1.34 | 0.074 | -1.3  | 0.023 | -1.31 | 0.052 |
| 1422700_at   | arachidonate 12-lipoxygenase                                                                      | Alox12        | -1.03 | 0.497 | 1.12  | 0.884 | 1.09  | 0.914 | -1.3  | 0.049 | 1.8   | 0.430 |
| 1441897_at   | RIKEN cDNA B230120H23 gene                                                                        | B230120H23Rik | -1.54 | 0.048 | -1.76 | 0.101 | 1.36  | 0.316 | -1.3  | 0.016 | 1     | 0.957 |
| 1440304_at   | BTB and CNC homology 2                                                                            | Bach2         | 1.39  | 0.971 | 2.6   | 0.595 | 1.14  | 0.547 | -1.3  | 0.041 | 1.02  | 0.903 |
| 1446293_at   | B-cell CLL/lymphoma 11A (zinc finger protein)                                                     | Bcl11a        | -1.34 | 0.276 | 1.11  | 0.763 | 1.09  | 0.842 | -1.3  | 0.006 | 1.2   | 0.647 |
| 1438806_at   | B-cell CLL/lymphoma 9-like                                                                        | Bcl9l         | 1.45  | 0.739 | 2.19  | 0.843 | -1.01 | 0.496 | -1.3  | 0.020 | -1.25 | 0.280 |
| 1450757_at   | cadherin 11                                                                                       | Cdh11         | 1.18  | 0.506 | -1.18 | 0.213 | -1.32 | 0.004 | -1.3  | 0.001 | -1.35 | 0.007 |
| 1449167_at   | erythrocyte protein band 4.1-like 4a                                                              | Epb4.114a     | -1.05 | 0.400 | -1.42 | 0.114 | -1.14 | 0.136 | -1.3  | 0.041 | -1.35 | 0.014 |
| 1460574_at   | FAT tumor suppressor homolog 4 (Drosophila)                                                       | Fat4          | 1.74  | 0.692 | -1.31 | 0.172 | -1.47 | 0.053 | -1.3  | 0.015 | -1.64 | 0.092 |
| 1418508_a_at | growth factor receptor bound protein 2                                                            | Grb2          | -1.45 | 0.044 | -1.28 | 0.019 | 1.17  | 0.510 | -1.3  | 0.026 | 1.12  | 0.447 |
| 1452443_s_at | helicase with zinc finger domain                                                                  | Helz          | -1.28 | 0.271 | -1.29 | 0.270 | -1.14 | 0.145 | -1.3  | 0.043 | -1.3  | 0.054 |
| 1439764_s_at | insulin-like growth factor 2 mRNA binding protein 2                                               | Igf2bp2       | -1.2  | 0.400 | -1.58 | 0.311 | -1.22 | 0.070 | -1.3  | 0.027 | -1.15 | 0.263 |
| 1434825_at   | similar to CAGL79                                                                                 | LOC381742     | -1.02 | 0.654 | -1.06 | 0.510 | -1.28 | 0.001 | -1.3  | 0.026 | -1.12 | 0.288 |
| 1422574_at   | Max dimerization protein 4                                                                        | Mxd4          | -1.25 | 0.355 | 1.19  | 0.407 | 1.17  | 0.689 | -1.3  | 0.020 | 1.03  | 0.740 |
| 1448893_at   | nuclear receptor co-repressor 2                                                                   | Ncor2         | 1.2   | 0.542 | 1.01  | 0.752 | -1.24 | 0.060 | -1.3  | 0.040 | -1.32 | 0.052 |
| 1420583_a_at | RAR-related orphan receptor alpha                                                                 | Rora          | -1.02 | 0.705 | -1.29 | 0.080 | -1.09 | 0.553 | -1.3  | 0.030 | -1.27 | 0.167 |
| 1453389_a_at | SH2B adaptor protein 2                                                                            | Sh2b2         | 1.69  | 0.399 | 2.43  | 0.305 | 1.78  | 0.269 | -1.3  | 0.044 | 1.6   | 0.080 |
| 1460204_at   | cytoplasmic tyrosine kinase, Dscr28C related (Drosophila)                                         | Tec           | 1.02  | 0.754 | -1.32 | 0.003 | -1.04 | 0.396 | -1.3  | 0.027 | -1.24 | 0.090 |
| 1441968_at   | tetraspanin 9                                                                                     | Tspan9        | 3.33  | 0.191 | 1.5   | 0.595 | -1.35 | 0.175 | -1.3  | 0.003 | 1.14  | 0.789 |
| 1438971_x_at | ubiquitin-conjugating enzyme E2H                                                                  | Ube2h         | -1.38 | 0.230 | -1.5  | 0.199 | -1.15 | 0.196 | -1.3  | 0.013 | -1.25 | 0.004 |
| 1453343_s_at | vaccinia related kinase 2                                                                         | Vrk2          | -1    | 0.945 | -1.32 | 0.031 | -1.19 | 0.104 | -1.3  | 0.007 | -1.21 | 0.048 |
| 1435608_at   | zinc and ring finger 3 /// similar to Goliath homolog precursor (Ring finger) ZnrF3 /// LOC63180F | LOC63180F     | -1.05 | 0.634 | -1.27 | 0.008 | -1.05 | 0.584 | -1.3  | 0.001 | -1.21 | 0.040 |
| 1452840_at   | RIKEN cDNA 1500009L16 gene                                                                        | 1500009L16Rik | 1.14  | 0.584 | 1.17  | 0.186 | 1.28  | 0.024 | -1.29 | 0.009 | 1.16  | 0.365 |
| 1454913_at   | RIKEN cDNA 9930104L06 gene                                                                        | 9930104L06Rik | 1.11  | 0.924 | -1.04 | 0.573 | 1.16  | 0.946 | -1.29 | 0.028 | 1.05  | 0.723 |
| 1454810_s_at | expressed sequence AI315068                                                                       | AI315068      | -1.2  | 0.376 | -1.56 | 0.204 | -1.25 | 0.071 | -1.29 | 0.038 | 1.03  | 0.729 |
| 1447985_s_at | ankyrin repeat and IBR domain containing 1                                                        | Ankib1        | -1.38 | 0.358 | -1.29 | 0.389 | 1.27  | 0.513 | -1.29 | 0.001 | 1.01  | 0.971 |
| 1443340_at   | calcium binding atopy-related autoantigen 1                                                       | Cbara1        | 1.5   | 0.186 | 1.17  | 0.848 | 1.14  | 0.923 | -1.29 | 0.021 | -1.13 | 0.591 |
| 1457104_at   | RIKEN cDNA D930036F22 gene                                                                        | D930036F22Rik | 1.18  | 0.791 | 1.02  | 0.794 | -1.85 | 0.005 | -1.29 | 0.017 | -1.43 | 0.139 |
| 1452718_at   | E3 ubiquitin protein ligase, HECT domain containing, 1                                            | Edd1          | -1.05 | 0.481 | -1.13 | 0.125 | -1.26 | 0.021 | -1.29 | 0.021 | -1.39 | 0.006 |
| 1438658_a_at | endothelial differentiation, sphingolipid G-protein-coupled receptor, 3                           | Edg3          | -1.43 | 0.285 | -2    | 0.181 | -1.31 | 0.006 | -1.29 | 0.020 | -1.37 | 0.015 |
| 1451263_a_at | fatty acid binding protein 4, adipocyte                                                           | Fabp4         | -1.51 | 0.205 | -1.04 | 0.663 | -1.09 | 0.336 | -1.29 | 0.023 | 1.69  | 0.021 |
| 1453746_at   | formin binding protein 1                                                                          | Fnbp1         | -1.27 | 0.369 | -1.42 | 0.298 | -1.25 | 0.021 | -1.29 | 0.023 | -1.2  | 0.042 |
| 1448223_at   | fatso                                                                                             | Fto           | -1.12 | 0.224 | -1.74 | 0.002 | -1.23 | 0.030 | -1.29 | 0.043 | -1.29 | 0.041 |
| 1434754_at   | GTPase activating RANGAP domain-like 4                                                            | Gaml4         | -1.14 | 0.012 | -1.41 | 0.009 | -1.26 | 0.014 | -1.29 | 0.011 | -1.55 | 0.005 |
| 1435282_at   | gene model 967, (NCBI)                                                                            | Gm967         | -1.33 | 0.250 | -1.44 | 0.152 | 1.14  | 0.479 | -1.29 | 0.020 | -1.19 | 0.217 |
| 1460203_at   | inositol 1,4,5-triphosphate receptor 1                                                            | Itp1r1        | -1.24 | 0.068 | -2.05 | 0.011 | -1.32 | 0.029 | -1.29 | 0.030 | -1.46 | 0.037 |
| 1436056_at   | kinesin family member 13B                                                                         | Kif13b        | -1.05 | 0.446 | -1.29 | 0.153 | -1.19 | 0.126 | -1.29 | 0.002 | -1.25 | 0.114 |
| 1444451_at   | pappalysin 2                                                                                      | Pappa2        | -1.32 | 0.196 | -1.12 | 0.377 | -1.21 | 0.379 | -1.29 | 0.026 | -1.36 | 0.182 |
| 1436970_a_at | platelet derived growth factor receptor, beta polypeptide                                         | Pdgfrb        | -1.3  | 0.257 | -1.4  | 0.060 | -1.2  | 0.074 | -1.29 | 0.011 | -1.19 | 0.127 |
| 1416390_at   | regulator of chromosome condensation (RCC1) and BTB (POZ) domain                                  | Rcctb2        | 1.09  | 0.485 | 1.05  | 0.590 | 1.09  | 0.594 | -1.29 | 0.020 | 1.26  | 0.184 |
| 1427299_at   | ribosomal protein S6 kinase polypeptide 3                                                         | Rps6ka3       | -1.05 | 0.287 | -1.42 | 0.011 | -1.37 | 0.010 | -1.29 | 0.039 | -1.42 | 0.005 |
| 1435964_a_at | TAO kinase 3                                                                                      | Taok3         | -1.36 | 0.326 | -1.6  | 0.253 | -1.07 | 0.475 | -1.29 | 0.002 | -1.31 | 0.008 |
| 1421683_at   | t-complex-associated testis expressed 3                                                           | Tcte3         | 1.16  | 0.623 | -1.13 | 0.462 | 1.15  | 0.748 | -1.29 | 0.049 | -1.22 | 0.376 |
| 1440348_at   | zinc finger, FYVE domain containing 9                                                             | Zfyve9        | -1.13 | 0.144 | -1.31 | 0.002 | -1.17 | 0.011 | -1.29 | 0.038 | -1.1  | 0.006 |
| 1436631_at   | RIKEN cDNA 2010010M04 gene                                                                        | 2010010M04Rik | -1.12 | 0.326 | 1.04  | 0.921 | 1.02  | 0.597 | -1.28 | 0.001 | -1.14 | 0.241 |
| 1431831_at   | RIKEN cDNA 2210009G21 gene                                                                        | 2210009G21Rik | 1.8   | 0.871 | 1.38  | 0.385 | -1.51 | 0.027 | -1.28 | 0.029 | -1.17 | 0.150 |
| 1433249_at   | RIKEN cDNA 4931409D07 gene                                                                        | 4931409D07Rik | 1.9   | 0.250 | 2.61  | 0.408 | 1.83  | 0.419 | -1.28 | 0.011 | 1.62  | 0.428 |
| 1429579_at   | RIKEN cDNA 6330407118 gene                                                                        | 6330407118Rik | 1.37  | 0.889 | -1.46 | 0.112 | -1.4  | 0.047 | -1.28 | 0.037 | -1.76 | 0.015 |
| 1452009_at   | RIKEN cDNA 9130422G05 gene                                                                        | 9130422G05Rik | 1.1   | 0.566 | -1.38 | 0.131 | -1.2  | 0.022 | -1.28 | 0.014 | -1.33 | 0.005 |
| 1418403_at   | a disintegrin and metalloproteinase domain 19 (meltrin beta)                                      | Adam19        | 6.69  | 0.600 | 3.65  | 0.560 | -1.41 | 0.006 | -1.28 | 0.023 | -1.54 | 0.010 |
| 1434265_s_at | ankyrin 2, brain                                                                                  | Ank2          | -1.27 | 0.145 | -1.91 | 0.049 | -1.3  | 0.098 | -1.28 | 0.041 | -1.34 | 0.131 |
| 1435959_at   | Rho GTPase activating protein 15                                                                  | Arhgap15      | 2.65  | 0.498 | 1.8   | 0.710 | 1.27  | 0.817 | -1.28 | 0.016 | -1.16 | 0.445 |
| 1434410_at   | cDNA sequence BC043118                                                                            | BC043118      | 1.25  | 0.402 | -1.07 | 0.279 | -1.27 | 0.172 | -1.28 | 0.049 | -1.02 | 0.240 |
| 1444607_at   | Corneodesmosin                                                                                    | Cdsn          | -1.11 | 0.275 | 1.09  | 0.695 | 1.28  | 0.389 | -1.28 | 0.025 | 1.23  | 0.346 |
| 1434917_at   | cordons-bleu                                                                                      | Cobl          | -1.09 | 0.319 | -1.14 | 0.242 | 1.09  | 0.480 | -1.28 | 0.018 | -1.56 | 0.016 |

|              |                                                                            |               |       |       |       |       |       |       |       |       |       |       |
|--------------|----------------------------------------------------------------------------|---------------|-------|-------|-------|-------|-------|-------|-------|-------|-------|-------|
| 1437448_s_at | catenin (cadherin associated protein), delta 1                             | Ctnnd1        | 1.27  | 0.658 | 1.06  | 0.757 | -1.16 | 0.306 | -1.28 | 0.004 | -1.37 | 0.004 |
| 1450756_s_at | cullin 3                                                                   | Cul3          | 3.04  | 0.568 | 2.14  | 0.912 | -1.33 | 0.021 | -1.28 | 0.010 | -1.55 | 0.000 |
| 1451977_at   | dual-specificity tyrosine-(Y)-phosphorylation regulated kinase 1a          | Dyrk1a        | 1.65  | 0.575 | 1.47  | 0.658 | -1.3  | 0.009 | -1.28 | 0.022 | -1.29 | 0.035 |
| 1418285_at   | ephrin B1                                                                  | Efnb1         | -1.33 | 0.061 | -1.5  | 0.010 | -1.42 | 0.019 | -1.28 | 0.002 | -1.11 | 0.115 |
| 1451264_at   | FERM domain containing 6                                                   | Frmd6         | 1.16  | 0.580 | -1.06 | 0.583 | -1.31 | 0.016 | -1.28 | 0.014 | -1.37 | 0.002 |
| 1440238_at   | glioma tumor suppressor candidate region gene 1                            | Gltsr1        | -1.33 | 0.231 | -1.14 | 0.370 | -1.02 | 0.982 | -1.28 | 0.010 | -1.21 | 0.140 |
| 1435992_at   | IQ motif containing with AAA domain                                        | Iqca          | 1.62  | 0.608 | 2.47  | 0.286 | 1.22  | 0.979 | -1.28 | 0.029 | 1.92  | 0.818 |
| 1453317_a_at | KH domain containing, RNA binding, signal transduction associated 3        | Khdrbs3       | -1.12 | 0.055 | -1.73 | 0.007 | -1.44 | 0.002 | -1.28 | 0.011 | -1.45 | 0.000 |
| 1447308_at   | longevity assurance homolog 5 (S. cerevisiae)                              | Lass5         | 1.15  | 0.333 | 1.2   | 0.766 | 1.16  | 0.226 | -1.28 | 0.013 | 1.23  | 0.218 |
| 1427485_at   | leiomodulin 1 (smooth muscle)                                              | Lmod1         | -1.06 | 0.242 | -1.33 | 0.079 | -1.11 | 0.377 | -1.28 | 0.044 | -1.11 | 0.335 |
| 1448870_at   | latent transforming growth factor beta binding protein 1                   | Ltbp1         | -1.13 | 0.155 | -1.35 | 0.038 | -1.28 | 0.009 | -1.28 | 0.007 | -1.41 | 0.018 |
| 1436165_at   | LUC7-like 2 (S. cerevisiae)                                                | Luc7l2        | 1.05  | 0.354 | -1.1  | 0.038 | -1.02 | 0.841 | -1.28 | 0.014 | -1.29 | 0.077 |
| 1440708_at   | myosin, heavy polypeptide 9, non-muscle                                    | Myh9          | -1.2  | 0.412 | -1.57 | 0.184 | -1.32 | 0.102 | -1.28 | 0.028 | -1.45 | 0.025 |
| 1454809_at   | nuclear receptor coactivator 7                                             | Ncoa7         | 1.11  | 0.489 | -1.66 | 0.018 | -1.09 | 0.454 | -1.28 | 0.011 | -1.19 | 0.365 |
| 1448435_at   | positive cofactor 2, multiprotein complex, glutamine/Q-rich-associated pr  | Pcqap         | 1.17  | 0.271 | 1.08  | 0.697 | -1.18 | 0.195 | -1.28 | 0.010 | -1.27 | 0.071 |
| 1423129_at   | soc-2 (suppressor of clear) homolog (C. elegans)                           | Shoc2         | 1.38  | 0.397 | 1.22  | 0.671 | -1.34 | 0.008 | -1.28 | 0.036 | -1.45 | 0.025 |
| 1433911_at   | Smg-6 homolog, nonsense mediated mRNA decay factor (C. elegans)            | Smg6          | -1.06 | 0.434 | -1.32 | 0.057 | -1.15 | 0.289 | -1.28 | 0.010 | -1.21 | 0.083 |
| 1440314_at   | Thyroid hormone receptor interactor 12                                     | Trip12        | -1.22 | 0.390 | -1.2  | 0.421 | -1.31 | 0.200 | -1.28 | 0.007 | -1.71 | 0.011 |
| 1434517_at   | WD repeat and FYVE domain containing 2                                     | Wdly2         | -1.27 | 0.328 | -1.84 | 0.174 | -1.29 | 0.016 | -1.28 | 0.003 | -1.21 | 0.194 |
| 1433343_at   | RIKEN cDNA 4930448K20 gene                                                 | 4930448K20Rik | 1.54  | 0.697 | 1.9   | 0.457 | -1.52 | 0.020 | -1.27 | 0.006 | 1.32  | 0.928 |
| 1438869_at   | RIKEN cDNA 4930515G01 gene                                                 | 4930515G01Rik | 1.12  | 0.491 | 1.24  | 0.565 | -1.07 | 0.314 | -1.27 | 0.046 | -1.12 | 0.273 |
| 1442115_at   | RIKEN cDNA 9430028L06 gene                                                 | 9430028L06Rik | -1.4  | 0.111 | -1.88 | 0.050 | -1.44 | 0.142 | -1.27 | 0.008 | -1.01 | 0.522 |
| 1440950_at   | Thymoma viral proto-oncogene 1                                             | Akt1          | 1.08  | 0.834 | 1.21  | 0.095 | -1.1  | 0.554 | -1.27 | 0.033 | 1.08  | 0.417 |
| 1448789_at   | aldehyde dehydrogenase family 1, subfamily A3                              | Aldh1a3       | -1.04 | 0.532 | -1.62 | 0.005 | -1.2  | 0.053 | -1.27 | 0.001 | -1.17 | 0.011 |
| 1451159_at   | Rho guanine nucleotide exchange factor (GEF) 12                            | Arhgef12      | 1.47  | 0.419 | 1.01  | 0.617 | -1.1  | 0.322 | -1.27 | 0.014 | -1.38 | 0.004 |
| 1437491_at   | bicaudal D homolog 2 (Drosophila)                                          | Bicd2         | 1.64  | 0.341 | 1.75  | 0.165 | -1.21 | 0.321 | -1.27 | 0.047 | -1.06 | 0.519 |
| 1460324_at   | DNA methyltransferase 3A                                                   | Dnmt3a        | -1.44 | 0.074 | -1.94 | 0.041 | 1.01  | 0.951 | -1.27 | 0.026 | -1.19 | 0.129 |
| 1418492_at   | gremlin 2 homolog, cysteine knot superfamily (Xenopus laevis)              | Grem2         | 1.13  | 0.632 | -1.16 | 0.309 | -1.26 | 0.031 | -1.27 | 0.013 | -1.33 | 0.004 |
| 1438430_at   | high mobility group box transcription factor 1                             | Hbp1          | -1.29 | 0.109 | -1.7  | 0.058 | -1.08 | 0.097 | -1.27 | 0.035 | -1.36 | 0.011 |
| 1438328_at   | host cell factor C2                                                        | Hcfc2         | 1.24  | 0.656 | -1.07 | 0.382 | 1.02  | 0.943 | -1.27 | 0.020 | -1.06 | 0.553 |
| 1446430_at   | HECT domain containing 2                                                   | Hectd2        | -1.09 | 0.550 | 1.05  | 0.985 | 1.21  | 0.647 | -1.27 | 0.046 | -1.23 | 0.199 |
| 1433731_at   | insulin-like growth factor 2 mRNA binding protein 3                        | Igf2bp3       | -1.3  | 0.181 | -1.42 | 0.118 | -1.43 | 0.006 | -1.27 | 0.042 | -1    | 0.963 |
| 1455404_at   | junctophilin 2                                                             | Jph2          | -1.05 | 0.450 | -1.33 | 0.003 | -1.14 | 0.117 | -1.27 | 0.002 | -1.29 | 0.174 |
| 1418232_s_at | LIM and senescent cell antigen-like domains 1                              | Lims1         | 1.55  | 0.387 | 1.08  | 0.804 | -1.27 | 0.004 | -1.27 | 0.009 | -1.44 | 0.008 |
| 1455827_at   | muscleblind-like 2                                                         | Mbnl2         | 1.45  | 0.445 | -1.01 | 0.501 | -1.47 | 0.012 | -1.27 | 0.001 | -1.63 | 0.019 |
| 1448061_at   | macrophage scavenger receptor 1                                            | Msr1          | 1.53  | 0.346 | 1.3   | 0.493 | -1.21 | 0.065 | -1.27 | 0.012 | 2.35  | 0.591 |
| 1451352_s_at | metastasis associated 3                                                    | Mta3          | 1.37  | 0.241 | -1.12 | 0.337 | -1.09 | 0.075 | -1.27 | 0.008 | -1.27 | 0.073 |
| 1433768_at   | palladin, cytoskeletal associated protein                                  | Palld         | 1.23  | 0.688 | -1.11 | 0.305 | -1.21 | 0.037 | -1.27 | 0.008 | -1.28 | 0.000 |
| 1419757_at   | phosphatidylinositol transfer protein, membrane-associated 2               | Pitpmn2       | -1.16 | 0.315 | -1.27 | 0.088 | 1     | 0.855 | -1.27 | 0.000 | -1.27 | 0.111 |
| 1429514_at   | phosphatidic acid phosphatase type 2B                                      | Ppap2b        | 1.01  | 0.882 | -1.45 | 0.010 | -1.14 | 0.085 | -1.27 | 0.023 | -1.25 | 0.037 |
| 1451179_a_at | quaking                                                                    | Qk            | -1.04 | 0.550 | -1.36 | 0.003 | -1.2  | 0.001 | -1.27 | 0.004 | -1.26 | 0.001 |
| 1447557_at   | RAB interacting factor                                                     | Rabif         | -1.25 | 0.339 | 1.01  | 0.976 | 1.09  | 0.752 | -1.27 | 0.036 | 1.63  | 0.422 |
| 1451041_at   | Rho-associated coiled-coil containing protein kinase 2                     | Rock2         | 1.25  | 0.474 | -1.39 | 0.145 | -1.5  | 0.010 | -1.27 | 0.009 | -1.6  | 0.014 |
| 1455549_at   | SEC14 and spectrin domains 1                                               | Sestd1        | -1.01 | 0.773 | -1.33 | 0.021 | -1.1  | 0.103 | -1.27 | 0.012 | -1.32 | 0.002 |
| 1426247_at   | serine/threonine kinase 24 (STE20 homolog, yeast)                          | Stk24         | 1.04  | 0.823 | -1.06 | 0.629 | -1.21 | 0.127 | -1.27 | 0.019 | -1.35 | 0.001 |
| 1453302_at   | transmembrane protein 81                                                   | Tmem81        | 1.2   | 0.941 | 1.04  | 0.718 | 1.71  | 0.528 | -1.27 | 0.019 | -1.03 | 0.776 |
| 1439539_at   | translocating chain-associating membrane protein 2                         | Tram2         | -1.15 | 0.163 | -1.5  | 0.068 | -1.07 | 0.150 | -1.27 | 0.005 | -1.14 | 0.212 |
| 1427258_at   | tripartite motif protein 24                                                | Trim24        | 1.05  | 0.838 | -1.05 | 0.664 | -1.07 | 0.046 | -1.27 | 0.030 | -1.31 | 0.009 |
| 1435091_at   | zinc finger protein 568                                                    | Zfp568        | 1.22  | 0.527 | 1.13  | 0.591 | -1.22 | 0.191 | -1.27 | 0.007 | -1.45 | 0.005 |
| 1452977_at   | zinc fingers and homeoboxes 3                                              | Zhx3          | 2.76  | 0.990 | 1.67  | 0.399 | -1.07 | 0.380 | -1.27 | 0.007 | -1.33 | 0.069 |
| 1433872_at   | RIKEN cDNA 2410042D21 gene                                                 | 2410042D21Rik | 1.02  | 0.857 | 1.01  | 0.986 | 1.05  | 0.604 | -1.26 | 0.020 | -1.12 | 0.050 |
| 1436729_at   | RIKEN cDNA 2600003E23 gene                                                 | 2600003E23Rik | 1.06  | 0.528 | -1.09 | 0.406 | -1.17 | 0.004 | -1.26 | 0.024 | -1.29 | 0.003 |
| 1428829_at   | RIKEN cDNA 6820401H01 gene                                                 | 6820401H01Rik | -1.15 | 0.406 | -2.32 | 0.129 | -1.18 | 0.002 | -1.26 | 0.044 | -1.36 | 0.000 |
| 1450879_at   | ATPas, class II, type 9B                                                   | Atp9b         | 1.12  | 0.754 | -1.43 | 0.082 | -1.34 | 0.052 | -1.26 | 0.038 | -1.8  | 0.018 |
| 1435883_at   | expressed sequence AW413431                                                | AW413431      | 2.56  | 0.454 | -1.53 | 0.096 | 1     | 0.821 | -1.26 | 0.048 | -1.51 | 0.103 |
| 1422533_at   | cytochrome P450, family 51                                                 | Cyp51         | -1.16 | 0.311 | -1.37 | 0.089 | 1.02  | 0.961 | -1.26 | 0.014 | 1.01  | 0.942 |
| 1424198_at   | discs, large homolog 5 (Drosophila)                                        | Dlg5          | 1.23  | 0.345 | -1.17 | 0.800 | -1.07 | 0.449 | -1.26 | 0.001 | -1.16 | 0.076 |
| 1448606_at   | endothelial differentiation, lysophosphatidic acid G-protein-coupled recep | Edg2          | -1.12 | 0.365 | -1.52 | 0.069 | -1.19 | 0.003 | -1.26 | 0.001 | -1.18 | 0.001 |

|              |                                                                        |                          |       |       |       |       |       |       |       |       |       |       |
|--------------|------------------------------------------------------------------------|--------------------------|-------|-------|-------|-------|-------|-------|-------|-------|-------|-------|
| 1417408_at   | coagulation factor III                                                 | F3                       | 1.05  | 0.896 | -1.15 | 0.186 | -1.14 | 0.051 | -1.26 | 0.024 | -1.3  | 0.026 |
| 1437468_x_at | F-box and WD-40 domain protein 11                                      | Fbxw11                   | -1.11 | 0.379 | -1.16 | 0.330 | -1.05 | 0.338 | -1.26 | 0.006 | -1.18 | 0.053 |
| 1438405_at   | fibroblast growth factor 7                                             | Fgf7                     | 1.25  | 0.173 | 1.09  | 0.571 | -1.28 | 0.001 | -1.26 | 0.003 | -1.21 | 0.102 |
| 1460319_at   | fucosyltransferase 8                                                   | Fut8                     | 1.29  | 0.810 | -1.67 | 0.056 | -1.32 | 0.076 | -1.26 | 0.030 | -1.7  | 0.011 |
| 1455476_a_at | genetic suppressor element 1                                           | Gse1                     | 1.78  | 0.505 | 1.37  | 0.860 | -1.22 | 0.089 | -1.26 | 0.042 | -1.2  | 0.115 |
| 1416029_at   | Kruppel-like factor 10                                                 | Klf10                    | 1.2   | 0.592 | -1.1  | 0.209 | -1.03 | 0.557 | -1.26 | 0.001 | -1.06 | 0.113 |
| 1435463_s_at | myosin ID                                                              | Myo1d                    | -1.18 | 0.000 | -2.15 | 0.003 | -1.29 | 0.000 | -1.26 | 0.004 | -1.31 | 0.014 |
| 1422466_at   | nucleoredoxin                                                          | Nxn                      | -1.14 | 0.074 | -1.25 | 0.153 | -1.18 | 0.022 | -1.26 | 0.039 | -1.23 | 0.099 |
| 1460325_at   | pumilio 1 (Drosophila)                                                 | Pum1                     | 1.04  | 0.556 | 1.14  | 0.245 | -1.13 | 0.063 | -1.26 | 0.005 | -1.17 | 0.036 |
| 1455310_at   | RNA binding motif protein 16                                           | Rbm16                    | -1.08 | 0.509 | -1.24 | 0.324 | -1.21 | 0.001 | -1.26 | 0.000 | -1.25 | 0.012 |
| 1419717_at   | sema domain, immunoglobulin domain (Ig), short basic domain, secreted  | Sema3e                   | 1.07  | 0.584 | -1.74 | 0.113 | -1.2  | 0.358 | -1.26 | 0.036 | -1.57 | 0.040 |
| 1456479_at   | sorting nexin family member 30                                         | Snx30                    | -1.02 | 0.746 | -1    | 0.965 | -1.06 | 0.074 | -1.26 | 0.004 | -1.28 | 0.000 |
| 1423246_at   | thioredoxin domain containing 4 (endoplasmic reticulum)                | Txndc4                   | 1.18  | 0.955 | -1.02 | 0.465 | -1.02 | 0.759 | -1.26 | 0.041 | -1.27 | 0.131 |
| 1416487_a_at | yes-associated protein 1                                               | Yap1                     | 1.29  | 0.502 | 1.03  | 0.746 | -1.42 | 0.009 | -1.26 | 0.028 | -1.39 | 0.035 |
| 1441822_at   | RIKEN cDNA 1700008F19 gene                                             | RIKEN cDNA 1700008F19Rik | -1.12 | 0.432 | -1.03 | 0.639 | 1.36  | 0.967 | -1.25 | 0.016 | 1.56  | 0.086 |
| 1438379_x_at | RIKEN cDNA 2310007F21 gene                                             | 2310007F21Rik            | -1.22 | 0.400 | -1.5  | 0.319 | -1.32 | 0.220 | -1.25 | 0.020 | 1.24  | 0.359 |
| 1430419_at   | RIKEN cDNA 2310031A07 gene                                             | 2310031A07Rik            | 1.23  | 0.776 | 1.9   | 0.033 | -1.69 | 0.154 | -1.25 | 0.006 | 1.12  | 0.385 |
| 1425913_a_at | RIKEN cDNA 2810022L02 gene                                             | 2810022L02Rik            | 1.14  | 0.835 | -1.58 | 0.032 | -1.12 | 0.089 | -1.25 | 0.024 | -1.31 | 0.028 |
| 1429691_at   | RIKEN cDNA 5430405N12 gene                                             | 5430405N12Rik            | 1.17  | 0.640 | -1.5  | 0.027 | -1.62 | 0.027 | -1.25 | 0.000 | -1.57 | 0.211 |
| 1443870_at   | ATP-binding cassette, sub-family C (CFTR/MRP), member 4                | Abcc4                    | -1.38 | 0.031 | -2.43 | 0.034 | -1.39 | 0.004 | -1.25 | 0.012 | -1.34 | 0.049 |
| 1438292_x_at | adenosine kinase                                                       | Adk                      | -1.23 | 0.199 | -1.48 | 0.109 | -1.15 | 0.107 | -1.25 | 0.015 | -1.17 | 0.082 |
| 1425640_at   | AF4/FMR2 family, member 1                                              | Aff1                     | 1.4   | 0.353 | 1.09  | 0.857 | -1.94 | 0.038 | -1.25 | 0.037 | -1.41 | 0.109 |
| 1424956_at   | AT hook, DNA binding motif, containing 1                               | Ahdc1                    | 1.03  | 0.815 | 1.14  | 0.879 | -1.08 | 0.550 | -1.25 | 0.039 | -1.04 | 0.861 |
| 1440193_at   | ankyrin repeat domain 12                                               | Ankrd12                  | -1.17 | 0.413 | -1.28 | 0.334 | -1.22 | 0.104 | -1.25 | 0.005 | 1.04  | 0.661 |
| 1434630_at   | ankyrin repeat domain 28                                               | Ankrd28                  | 1.02  | 0.452 | -1.28 | 0.044 | -1.15 | 0.035 | -1.25 | 0.025 | -1.4  | 0.003 |
| 1438143_s_at | ataxin 2                                                               | Atxn2                    | -1.17 | 0.410 | -1.11 | 0.450 | -1.16 | 0.049 | -1.25 | 0.002 | -1.11 | 0.056 |
| 1456523_at   | expressed sequence C77713                                              | C77713                   | 1.61  | 0.624 | 1.13  | 0.488 | -1.28 | 0.002 | -1.25 | 0.032 | -1.3  | 0.003 |
| 1431146_a_at | copine VIII                                                            | Cpne8                    | 1.41  | 0.693 | -1.02 | 0.331 | -1.19 | 0.158 | -1.25 | 0.008 | -1.11 | 0.125 |
| 1421897_at   | ELK1, member of ETS oncogene family                                    | Elk1                     | 1.12  | 0.619 | 1.19  | 0.253 | -1.16 | 0.345 | -1.25 | 0.046 | 1.29  | 0.296 |
| 1422028_a_at | E26 avian leukemia oncogene 1, 5' domain                               | Ets1                     | -1.26 | 0.342 | 1.16  | 0.652 | -1.27 | 0.083 | -1.25 | 0.030 | -1.14 | 0.264 |
| 1433605_at   | inositol polyphosphate-5-phosphatase A                                 | Inpp5a                   | -1.08 | 0.409 | -1.43 | 0.015 | -1.23 | 0.000 | -1.25 | 0.001 | -1.31 | 0.021 |
| 1444322_at   | lipocalin 11                                                           | Lcn11                    | -1.35 | 0.179 | -1.14 | 0.321 | -1.47 | 0.098 | -1.25 | 0.018 | 1.87  | 0.242 |
| 1427705_a_at | nuclear factor of kappa light chain gene enhancer in B-cells 1, p105   | Nfkb1                    | 1.08  | 0.418 | -1.06 | 0.673 | -1.27 | 0.005 | -1.25 | 0.007 | -1.3  | 0.009 |
| 1435881_at   | poly(rC) binding protein 2                                             | Pcbp2                    | -1.2  | 0.171 | -1.45 | 0.072 | -1.11 | 0.091 | -1.25 | 0.044 | 1.04  | 0.208 |
| 1432820_at   | proteasome (prosome, macropain) 26S subunit, non-ATPase, 7             | Psmd7                    | 2.09  | 0.288 | 1.03  | 0.846 | 2.34  | 0.086 | -1.25 | 0.032 | -1.06 | 0.841 |
| 1453406_a_at | RAB28, member RAS oncogene family                                      | Rab28                    | 1.06  | 0.835 | -1.17 | 0.260 | -1.09 | 0.524 | -1.25 | 0.026 | -1.17 | 0.126 |
| 1424330_at   | SUMO1/sentrin specific peptidase 1                                     | Senp1                    | -1.03 | 0.572 | 1.26  | 0.840 | 1.33  | 0.310 | -1.25 | 0.009 | -1.07 | 0.636 |
| 1448847_at   | serine incorporator 3                                                  | Serinc3                  | 1.57  | 0.149 | 1.19  | 0.307 | 1.02  | 0.732 | -1.25 | 0.032 | 1.67  | 0.214 |
| 1426637_a_at | sine oculis-related homeobox 3 homolog (Drosophila)                    | Six3                     | 1.2   | 0.203 | 1.44  | 0.013 | 1.03  | 0.995 | -1.25 | 0.031 | 1.29  | 0.331 |
| 1454938_at   | sorting nexin 13                                                       | Snx13                    | 1.19  | 0.129 | -1.1  | 0.374 | -1.17 | 0.017 | -1.25 | 0.008 | -1.31 | 0.014 |
| 1427917_s_at | single-stranded DNA binding protein 3                                  | Ssbp3                    | -1.21 | 0.148 | -1.69 | 0.036 | -1.13 | 0.096 | -1.25 | 0.032 | -1.07 | 0.397 |
| 1450406_a_at | ST3 beta-galactoside alpha-2,3-sialyltransferase 3                     | ST3gal3                  | 1.09  | 0.508 | -1.3  | 0.082 | -1.38 | 0.012 | -1.25 | 0.021 | -1.26 | 0.094 |
| 1452061_s_at | spermatid perinuclear RNA binding protein                              | Strbp                    | -1.32 | 0.329 | -1.57 | 0.218 | -1.12 | 0.300 | -1.25 | 0.050 | -1.24 | 0.204 |
| 1422566_at   | transcription factor EB                                                | Tcfef                    | -1.26 | 0.319 | -1.15 | 0.486 | 2.18  | 0.473 | -1.25 | 0.029 | -1.07 | 0.603 |
| 1424652_at   | transmembrane protein 166                                              | Tmem166                  | 1.15  | 0.276 | 1.24  | 0.147 | -1.27 | 0.000 | -1.25 | 0.004 | -1.19 | 0.095 |
| 1427348_at   | zinc finger CCCH type containing 12A                                   | Zc3h12a                  | -1.1  | 0.391 | 1.01  | 0.876 | 1.23  | 0.754 | -1.25 | 0.035 | 1.16  | 0.777 |
| 1419924_at   | RIKEN cDNA A730024A03 gene                                             | A730024A03Rik            | -1.3  | 0.168 | -1.09 | 0.488 | 1.12  | 0.927 | -1.24 | 0.004 | -1.07 | 0.530 |
| 1415927_at   | actin, alpha, cardiac                                                  | Actc1                    | 1.38  | 0.781 | 1.53  | 1.000 | -1.13 | 0.448 | -1.24 | 0.013 | 1.13  | 0.046 |
| 1455340_at   | Expressed sequence AI852444                                            | AI852444                 | 1.21  | 0.340 | -1.18 | 0.378 | -1.09 | 0.139 | -1.24 | 0.004 | -1.18 | 0.327 |
| 1415684_at   | autophagy-related 5 (yeast)                                            | Atg5                     | -1.03 | 0.595 | -1.03 | 0.811 | -1.04 | 0.728 | -1.24 | 0.014 | -1.22 | 0.141 |
| 1435034_at   | expressed sequence AW060207                                            | AW060207                 | 1.1   | 0.365 | -1.23 | 0.254 | -1.09 | 0.433 | -1.24 | 0.034 | -1.05 | 0.638 |
| 1435248_a_at | BTAF1 RNA polymerase II, B-TFIID transcription factor-associated, (Mot | Btaf1                    | 1.09  | 0.044 | 1.07  | 0.348 | -1.24 | 0.001 | -1.24 | 0.009 | -1.37 | 0.005 |
| 1451382_at   | Chac, cation transport regulator-like 1 (E. coli)                      | Chac1                    | -1.22 | 0.007 | -2.44 | 0.001 | -1.18 | 0.052 | -1.24 | 0.002 | -1.32 | 0.001 |
| 1458263_at   | CUG triplet repeat, RNA binding protein 2                              | Cugbp2                   | 1.08  | 0.701 | 1.3   | 0.881 | 1.02  | 0.735 | -1.24 | 0.025 | -1.27 | 0.556 |
| 1431618_a_at | DNA segment, Chr 14, ERATO Doi 581, expressed                          | D14Entd581e              | 4.82  | 0.443 | 3.57  | 0.925 | -1.42 | 0.009 | -1.24 | 0.037 | -1.67 | 0.107 |
| 1438045_at   | early endosome antigen 1                                               | Eea1                     | 1.27  | 0.275 | -1.34 | 0.109 | -1.29 | 0.027 | -1.24 | 0.012 | -1.59 | 0.038 |
| 1428470_at   | exocyst complex component 2                                            | Exoc2                    | 1.09  | 0.046 | -1.23 | 0.027 | -1.16 | 0.292 | -1.24 | 0.004 | -1.13 | 0.443 |
| 1442059_at   | fragile X mental retardation gene 1, autosomal homolog                 | Fxr1h                    | 1.04  | 0.559 | 1.19  | 0.732 | -1.22 | 0.064 | -1.24 | 0.023 | -1.2  | 0.299 |



|              |                                                                            |               |       |       |       |       |       |       |       |       |       |       |
|--------------|----------------------------------------------------------------------------|---------------|-------|-------|-------|-------|-------|-------|-------|-------|-------|-------|
| 1425969_a_at | Huntington disease gene homolog                                            | Hdh           | -1.27 | 0.254 | -1.45 | 0.160 | -1.24 | 0.029 | -1.24 | 0.034 | -1.41 | 0.002 |
| 1425142_a_at | heterogeneous nuclear ribonucleoprotein D                                  | Hnrpd         | -1.11 | 0.036 | -1.3  | 0.026 | -1.29 | 0.008 | -1.24 | 0.008 | -1.19 | 0.103 |
| 1435720_at   | potassium voltage-gated channel, Shal-related family, member 3             | Kcnd3         | 1.2   | 0.975 | 1.77  | 0.239 | 1.12  | 0.981 | -1.24 | 0.031 | 1.22  | 0.930 |
| 1418594_a_at | nuclear receptor coactivator 1                                             | Ncoa1         | -1.11 | 0.410 | -2.39 | 0.051 | -1.23 | 0.026 | -1.24 | 0.028 | -1.63 | 0.009 |
| 1443319_at   | phosphoprotein associated with glycosphingolipid microdomains 1            | Pag1          | 1.83  | 0.166 | 2.55  | 0.079 | 1.96  | 0.167 | -1.24 | 0.008 | -1.07 | 0.846 |
| 1437360_at   | protocadherin 19                                                           | Pcdh19        | -1.09 | 0.301 | -1.94 | 0.011 | -1.42 | 0.026 | -1.24 | 0.034 | -1.48 | 0.003 |
| 1460263_at   | Programmed cell death 6 interacting protein                                | Pdcd6ip       | -1.25 | 0.329 | -1.21 | 0.313 | 1.04  | 0.519 | -1.24 | 0.048 | 1.09  | 0.197 |
| 1418406_at   | phosphodiesterase 8A                                                       | Pde8a         | 1.09  | 0.309 | -1.25 | 0.126 | -1.22 | 0.072 | -1.24 | 0.002 | -1.16 | 0.017 |
| 1435836_at   | pyruvate dehydrogenase kinase, isoenzyme 1                                 | Pdk1          | -1.03 | 0.499 | 1.04  | 0.407 | 1.15  | 0.131 | -1.24 | 0.044 | 1.09  | 0.056 |
| 1438854_x_at | phosphatidylinositol membrane-associated 1                                 | Pitpm1        | 1.08  | 0.738 | 1.11  | 0.509 | 1.05  | 0.914 | -1.24 | 0.030 | 1.32  | 0.029 |
| 1436616_at   | expressed sequence R74740                                                  | R74740        | 1.22  | 0.245 | -1.14 | 0.343 | 1.09  | 0.582 | -1.24 | 0.013 | 1.06  | 0.776 |
| 1424188_at   | RAB GTPase activating protein 1                                            | Rabgap1       | 1.18  | 0.270 | 1.14  | 0.433 | -1.12 | 0.122 | -1.24 | 0.005 | -1.45 | 0.001 |
| 1448689_at   | related RAS viral (r-ras) oncogene homolog 2                               | Rras2         | 1.06  | 0.308 | -1.18 | 0.079 | -1.24 | 0.005 | -1.24 | 0.007 | -1.4  | 0.002 |
| 1427640_a_at | runt-related transcription factor 1; translocated to, 1 (cyclin D-related) | Runx1t1       | 1.09  | 0.464 | -1.58 | 0.153 | -1.22 | 0.207 | -1.24 | 0.027 | -1.46 | 0.050 |
| 1444644_x_at | TatD DNase domain containing 1                                             | Tatdn1        | -1.18 | 0.327 | 1.05  | 0.890 | -1.04 | 0.286 | -1.24 | 0.041 | 1.21  | 0.150 |
| 1444004_at   | THO complex 2                                                              | Thoc2         | -1.03 | 0.614 | -1.19 | 0.354 | -1.26 | 0.140 | -1.24 | 0.041 | -1.31 | 0.017 |
| 1448396_at   | transmembrane protein 131                                                  | Tmem131       | -1.06 | 0.182 | -1.16 | 0.104 | -1.11 | 0.472 | -1.24 | 0.044 | -1.25 | 0.000 |
| 1434560_at   | WD and tetratricopeptide repeats 1                                         | Wdtdc1        | 1.44  | 0.829 | -1.43 | 0.241 | 1.27  | 0.310 | -1.24 | 0.018 | 1.62  | 0.010 |
| 1435072_at   | zinc finger, FYVE domain containing 1                                      | Zfyve1        | 1.19  | 0.279 | 1.22  | 0.162 | -1.13 | 0.423 | -1.24 | 0.006 | 1.13  | 0.344 |
| 1439967_at   | RIKEN cDNA 1700071A11 gene                                                 | 1700071A11Rik | -1.21 | 0.345 | -1.2  | 0.391 | 1.23  | 0.704 | -1.23 | 0.001 | 1.06  | 0.795 |
| 1434620_s_at | RIKEN cDNA 2610024E20 gene                                                 | 2610024E20Rik | -1.05 | 0.532 | -1.15 | 0.157 | -1.18 | 0.105 | -1.23 | 0.035 | -1.25 | 0.182 |
| 1421172_at   | a disintegrin and metalloproteinase domain 12 (meltrin alpha)              | Adam12        | 1.01  | 0.686 | -1.48 | 0.109 | -1.38 | 0.024 | -1.23 | 0.050 | -1.53 | 0.001 |
| 1436640_x_at | 1-acylglycerol-3-phosphate O-acyltransferase 1 (lysophosphatidic acid a    | Agpat4        | -1.12 | 0.373 | -1.41 | 0.232 | 1.01  | 0.968 | -1.23 | 0.008 | -1.3  | 0.039 |
| 1455306_at   | cDNA sequence BC037112                                                     | BC037112      | 1.11  | 0.674 | 1.18  | 0.418 | -1.06 | 0.448 | -1.23 | 0.029 | -1.46 | 0.000 |
| 1434757_at   | core-binding factor, runt domain, alpha subunit 2, translocated to, 2 hom  | Cbfa2t2h      | -1.1  | 0.404 | -1.05 | 0.469 | 1.01  | 0.942 | -1.23 | 0.002 | -1.16 | 0.071 |
| 1429455_at   | GTPase activating protein and VPS9 domains 1                               | Gapvd1        | 1.05  | 0.856 | 1.07  | 0.628 | 1.12  | 0.098 | -1.23 | 0.018 | -1.05 | 0.423 |
| 1423569_at   | glycine amidinotransferase (L-arginine:glycine amidinotransferase)         | Gatm          | 1.26  | 1.148 | 1.11  | 0.532 | 1.36  | 0.573 | -1.23 | 0.033 | 1.02  | 0.837 |
| 1429088_at   | limb-bud and heart                                                         | Lbh           | -1.1  | 0.117 | -1.42 | 0.025 | -1.13 | 0.057 | -1.23 | 0.048 | -1.24 | 0.055 |
| 1422706_at   | similar to Nedd4 WW binding protein 4                                      | LOC637870     | -1.1  | 0.144 | -1.44 | 0.004 | -1.14 | 0.047 | -1.23 | 0.004 | -1.16 | 0.030 |
| 1425029_a_at | membrane bound O-acyltransferase domain containing 2                       | Mboat2        | -1.35 | 0.196 | -1.6  | 0.076 | -1.1  | 0.202 | -1.23 | 0.004 | -1.06 | 0.805 |
| 1456772_at   | neutrophil cytosolic factor 1                                              | Ncf1          | 1.12  | 0.614 | 1.06  | 0.808 | 1.04  | 0.665 | -1.23 | 0.032 | 1.76  | 0.213 |
| 1415729_at   | 3-phosphoinositide dependent protein kinase-1                              | Pdpk1         | -1.11 | 0.214 | -1.25 | 0.017 | -1.02 | 0.513 | -1.23 | 0.003 | -1.16 | 0.047 |
| 1460398_at   | PHD finger protein 8                                                       | Phf8          | 1.06  | 0.855 | 1.01  | 0.748 | 1.01  | 0.928 | -1.23 | 0.001 | -1.35 | 0.007 |
| 1427006_at   | Rap guanine nucleotide exchange factor (GEF) 1                             | Rapgef1       | -1.09 | 0.110 | -1.27 | 0.032 | -1.04 | 0.685 | -1.23 | 0.021 | -1.19 | 0.214 |
| 1454962_at   | spire homolog 1 (Drosophila)                                               | Spire1        | 1.1   | 0.264 | -1.21 | 0.048 | -1.14 | 0.030 | -1.23 | 0.038 | -1.39 | 0.006 |
| 1418755_at   | T-box 15                                                                   | Tbx15         | -1.06 | 0.513 | -1.1  | 0.253 | 1.15  | 0.548 | -1.23 | 0.024 | -1.39 | 0.033 |
| 1418145_at   | tuftelin interacting protein 11                                            | Tfip11        | 1.38  | 0.249 | 1.35  | 0.444 | -1.21 | 0.170 | -1.23 | 0.011 | 1.36  | 0.243 |
| 1431827_a_at | tousled-like kinase 2 (Arabidopsis)                                        | Tlk2          | 4.49  | 0.363 | 3.56  | 0.513 | -1.15 | 0.087 | -1.23 | 0.027 | -1.58 | 0.015 |
| 1449033_at   | tumor necrosis factor receptor superfamily, member 11b (osteoprotegerin)   | Tnfrsf11b     | -1.12 | 0.257 | -1.21 | 0.170 | 1.01  | 0.954 | -1.23 | 0.030 | 1.35  | 0.058 |
| 1436982_at   | trinucleotide repeat containing 6b                                         | Tnrc6b        | 1.03  | 0.876 | -1.34 | 0.049 | -1.09 | 0.190 | -1.23 | 0.033 | -1.29 | 0.015 |
| 1456623_at   | tropomyosin 1, alpha                                                       | Tpm1          | -1.04 | 0.504 | -1.27 | 0.015 | -1.28 | 0.212 | -1.23 | 0.025 | -1.15 | 0.141 |
| 1448146_at   | WW domain containing E3 ubiquitin protein ligase 2                         | Wwp2          | -1.28 | 0.291 | -1.29 | 0.321 | -1.03 | 0.675 | -1.23 | 0.014 | -1.3  | 0.150 |
| 1435669_at   | zinc finger protein 532                                                    | Zfp532        | 1.93  | 0.373 | 1.69  | 0.624 | -1.15 | 0.037 | -1.23 | 0.025 | -1.25 | 0.035 |
| 1459722_at   | Zinc finger, SWIM domain containing 6                                      | Zswim6        | -1.26 | 0.337 | -1.27 | 0.300 | 1.13  | 0.493 | -1.23 | 0.004 | -1.95 | 0.011 |
| 1452415_at   | actinin, alpha 1                                                           | Actn1         | 1.28  | 0.818 | -1    | 0.411 | -1.19 | 0.056 | -1.22 | 0.049 | -1.29 | 0.009 |
| 1460712_s_at | adaptor protein complex AP-1, gamma 1 subunit                              | Ap1g1         | -1.19 | 0.254 | -1.13 | 0.053 | -1.03 | 0.569 | -1.22 | 0.028 | -1.31 | 0.008 |
| 1454916_s_at | ADP-ribosylation factor interacting protein 1                              | Arfip1        | 1.01  | 0.891 | -1.38 | 0.004 | -1.19 | 0.078 | -1.22 | 0.002 | -1.4  | 0.022 |
| 1439814_at   | ATPase, class I, type 8B, member 4                                         | Atp8b4        | -1.01 | 0.572 | -1.56 | 0.153 | -1.02 | 0.669 | -1.22 | 0.009 | -1.19 | 0.048 |
| 1417861_at   | cyclin C                                                                   | Ccnc          | 1.91  | 0.450 | 1.76  | 0.661 | 1.09  | 0.247 | -1.22 | 0.047 | 1.04  | 0.651 |
| 1459118_at   | hypothetical protein D230038C21                                            | D230038C21    | -1.1  | 0.733 | -1.05 | 0.572 | -1.06 | 0.501 | -1.22 | 0.037 | -1.29 | 0.195 |
| 1431011_at   | dihydrolipoamide S-succinyltransferase (E2 component of 2-oxo-glutarat     | Dlst          | -1.03 | 0.491 | -1.15 | 0.212 | 1.31  | 0.299 | -1.22 | 0.019 | 1.35  | 0.285 |
| 1433776_at   | lipoma HMGIC fusion partner                                                | Lhfp          | -1.01 | 0.728 | -1.35 | 0.002 | -1.23 | 0.000 | -1.22 | 0.037 | -1.29 | 0.005 |
| 1449362_a_at | missshapen-like kinase 1 (zebrafish)                                       | Mink1         | -1.17 | 0.350 | -1.14 | 0.278 | 1.07  | 0.845 | -1.22 | 0.030 | 1.27  | 0.056 |
| 1425504_at   | myosin, light polypeptide kinase                                           | Mylk          | 12.03 | 0.493 | 9.38  | 0.686 | -1.01 | 0.977 | -1.22 | 0.016 | -1.02 | 0.539 |
| 1439154_at   | nucleoporin 98                                                             | Nup98         | 1.1   | 0.307 | -1.03 | 0.635 | -1.13 | 0.100 | -1.22 | 0.050 | -1.41 | 0.012 |
| 1420851_at   | par-6 partitioning defective 6 homolog gamma (C. elegans)                  | Pard6g        | 1.08  | 0.545 | 1.09  | 0.792 | -1.03 | 0.546 | -1.22 | 0.016 | -1.08 | 0.225 |
| 1418036_at   | DNA primase, p58 subunit                                                   | Prim2         | 1.02  | 0.738 | -1.47 | 0.005 | -1.1  | 0.249 | -1.22 | 0.042 | -1.37 | 0.005 |
| 1455359_at   | protein tyrosine phosphatase, non-receptor type 14                         | Ptpn14        | -1.07 | 0.367 | -1.2  | 0.086 | 1.04  | 0.148 | -1.22 | 0.020 | -1.21 | 0.004 |

|              |                                                                                |                          |       |       |       |       |       |       |       |       |       |       |
|--------------|--------------------------------------------------------------------------------|--------------------------|-------|-------|-------|-------|-------|-------|-------|-------|-------|-------|
| 1425266_a_at | RAP1, GTP-GDP dissociation stimulator 1                                        | Rap1gds1                 | 1.21  | 0.584 | -1.07 | 0.398 | -1.11 | 0.057 | -1.22 | 0.032 | -1.21 | 0.002 |
| 1437378_x_at | scavenger receptor class B, member 1                                           | Scarb1                   | -1.27 | 0.293 | -1.18 | 0.403 | -1.1  | 0.306 | -1.22 | 0.003 | -1.08 | 0.463 |
| 1428929_s_at | solute carrier family 25 (mitochondrial carrier, phosphate carrier), member 1  | Slc25a26                 | -1.1  | 0.527 | -1.42 | 0.018 | -1.06 | 0.677 | -1.22 | 0.045 | -1.09 | 0.464 |
| 1423621_a_at | solute carrier family 33 (acetyl-CoA transporter), member 1                    | Slc33a1                  | -1.28 | 0.164 | -1.29 | 0.100 | -1.15 | 0.141 | -1.22 | 0.004 | -1.11 | 0.367 |
| 1433648_at   | sperm associated antigen 9                                                     | Spag9                    | 1.08  | 0.400 | -1.4  | 0.049 | -1.34 | 0.002 | -1.22 | 0.021 | -1.36 | 0.006 |
| 1420043_s_at | THO complex 1                                                                  | Thoc1                    | -1.14 | 0.370 | 1.29  | 0.591 | 1.22  | 0.264 | -1.22 | 0.020 | 1.41  | 0.020 |
| 1459666_at   | trafficking protein, kinesin binding 1                                         | Trak1                    | -1.26 | 0.096 | -1.4  | 0.005 | -1.36 | 0.020 | -1.22 | 0.046 | -1.4  | 0.044 |
| 1426881_at   | ubiquitin protein ligase E3C                                                   | Ube3c                    | 1.02  | 0.543 | -1.19 | 0.225 | -1.19 | 0.002 | -1.22 | 0.021 | -1.36 | 0.052 |
| 1426700_a_at | ubiquitin specific peptidase 52                                                | Usp52                    | 1.38  | 0.344 | 1.32  | 0.261 | 1.09  | 0.859 | -1.22 | 0.039 | 1.2   | 0.559 |
| 1425074_at   | Werner syndrome homolog (human)                                                | Wrn                      | -1.05 | 0.530 | -1.61 | 0.006 | -1.23 | 0.210 | -1.22 | 0.021 | -1.06 | 0.699 |
| 1459048_s_at | zinc finger protein 142                                                        | Zfp142                   | -1.19 | 0.272 | -1.01 | 0.725 | 1.13  | 0.267 | -1.22 | 0.001 | 1.12  | 0.311 |
| 1444107_at   | RIKEN cDNA 9430029N19 gene                                                     | RIKEN cDNA 9430029N19Rik | -1.11 | 0.144 | -1.15 | 0.181 | -1.05 | 0.585 | -1.21 | 0.032 | 1.02  | 0.620 |
| 1434447_at   | expressed sequence AI838057                                                    | AI838057                 | 1.12  | 0.150 | -1.23 | 0.171 | 1.14  | 0.718 | -1.21 | 0.031 | -1.17 | 0.120 |
| 1438270_at   | expressed sequence AI846148                                                    | AI846148                 | 1.07  | 0.839 | 1.09  | 0.601 | -1.06 | 0.668 | -1.21 | 0.021 | 1.08  | 0.273 |
| 1426301_at   | activated leukocyte cell adhesion molecule                                     | Alcam                    | 1.05  | 0.985 | -1.47 | 0.130 | -1.16 | 0.145 | -1.21 | 0.005 | -1.08 | 0.390 |
| 1450717_at   | angiogenin, ribonuclease A family, member 1                                    | Ang1                     | 1.39  | 0.202 | 1.37  | 0.023 | -1.19 | 0.065 | -1.21 | 0.038 | -1.19 | 0.043 |
| 1454745_at   | Rho GTPase activating protein 29                                               | Arhgap29                 | 1.03  | 0.217 | -1.1  | 0.074 | -1.22 | 0.048 | -1.21 | 0.009 | -1.3  | 0.015 |
| 1434215_at   | RIKEN cDNA B230308N11 gene                                                     | B230308N11Rik            | -1.04 | 0.651 | -1.32 | 0.123 | -1.17 | 0.031 | -1.21 | 0.022 | -1.25 | 0.013 |
| 1451729_at   | bone morphogenetic protein receptor, type 1A                                   | Bmpr1a                   | -1.31 | 0.335 | -1.46 | 0.283 | -1.24 | 0.087 | -1.21 | 0.040 | 1.27  | 0.198 |
| 1454874_at   | BTB (POZ) domain containing 7                                                  | Btb7                     | 1.05  | 0.276 | -1.01 | 0.788 | -1.02 | 0.663 | -1.21 | 0.015 | -1.27 | 0.007 |
| 1426669_at   | RIKEN cDNA C530044N13 gene                                                     | C530044N13Rik            | -1.06 | 0.501 | 1.1   | 0.425 | 1.04  | 0.757 | -1.21 | 0.020 | 1.17  | 0.271 |
| 1423942_a_at | calcium/calmodulin-dependent protein kinase II gamma                           | Camk2g                   | 1.31  | 0.471 | 1.02  | 0.759 | -1.08 | 0.408 | -1.21 | 0.014 | -1.16 | 0.012 |
| 1446399_at   | cadherin 10                                                                    | Cdh10                    | 2.4   | 0.365 | 2.16  | 0.284 | -1.24 | 0.243 | -1.21 | 0.032 | 1.32  | 0.133 |
| 1438211_s_at | D site albumin promoter binding protein                                        | Dbp                      | -1.04 | 0.577 | 1.24  | 0.490 | 1.11  | 0.993 | -1.21 | 0.003 | 1.55  | 0.032 |
| 1437763_at   | DCN1, defective in cullin neddylation 1, domain containing 3 (S. cerevisiae)   | Dcun1d3                  | -1.01 | 0.648 | -1.01 | 0.672 | -1.06 | 0.310 | -1.21 | 0.007 | -1.06 | 0.560 |
| 1422738_at   | discoidin domain receptor family, member 2                                     | Ddr2                     | -1.03 | 0.652 | -1.54 | 0.081 | -1.34 | 0.119 | -1.21 | 0.003 | -1.2  | 0.060 |
| 1433490_s_at | erythrocyte protein band 4.1-like 2                                            | Epb4.1l2                 | 1.08  | 0.509 | -1.23 | 0.099 | -1.25 | 0.006 | -1.21 | 0.013 | -1.32 | 0.000 |
| 1420933_a_at | eyes absent 3 homolog (Drosophila)                                             | Eya3                     | -1.1  | 0.342 | -1.12 | 0.221 | -1.09 | 0.266 | -1.21 | 0.015 | -1.22 | 0.063 |
| 1449121_at   | FUS interacting protein (serine-arginine rich) 1                               | Fusip1                   | 1.06  | 0.950 | -1.12 | 0.191 | 1.37  | 0.446 | -1.21 | 0.045 | 1.22  | 0.277 |
| 1447470_at   | haloacid dehalogenase-like hydrolase domain containing 2                       | Hdh2                     | 1.06  | 0.387 | 1.25  | 0.636 | 1.25  | 0.261 | -1.21 | 0.020 | 1.58  | 0.481 |
| 1452237_at   | HIV-1 Rev binding protein                                                      | Hrb                      | 1.16  | 0.116 | 1.09  | 0.461 | -1.15 | 0.038 | -1.21 | 0.040 | -1.26 | 0.023 |
| 1436510_a_at | leucine rich repeat (in FLII) interacting protein 2                            | Lrrfip2                  | -1.2  | 0.403 | -1.72 | 0.278 | -1.16 | 0.046 | -1.21 | 0.043 | -1.23 | 0.054 |
| 1456462_x_at | protein phosphatase 1, catalytic subunit, beta isoform                         | Ppp1cb                   | -1.37 | 0.220 | -1.14 | 0.385 | -1    | 0.890 | -1.21 | 0.013 | 1.25  | 0.191 |
| 1417850_at   | retinoblastoma 1                                                               | Rb1                      | 1     | 0.850 | -1.5  | 0.074 | 1.08  | 0.263 | -1.21 | 0.001 | -1.11 | 0.380 |
| 1434336_s_at | REST corepressor 1                                                             | Rcor1                    | -1.01 | 0.527 | 1.09  | 0.277 | -1.03 | 0.664 | -1.21 | 0.040 | -1.12 | 0.356 |
| 1457116_at   | REX1, RNA exonuclease 1 homolog (S. cerevisiae)                                | Rexo1                    | -1.33 | 0.177 | -1.03 | 0.696 | -1.19 | 0.355 | -1.21 | 0.017 | 1.45  | 0.182 |
| 1436660_at   | ribosome binding protein 1                                                     | Rrbp1                    | -1.18 | 0.172 | -1.33 | 0.030 | -1.17 | 0.270 | -1.21 | 0.004 | -1.4  | 0.090 |
| 1452261_at   | SNF2 histone linker PHD RING helicase                                          | Shprh                    | 2.02  | 0.449 | 2.76  | 0.467 | 1.14  | 0.411 | -1.21 | 0.036 | -1.26 | 0.050 |
| 1427916_at   | suppression of tumorigenicity 7-like                                           | St7l                     | 1.28  | 0.367 | 1.05  | 0.778 | -1.19 | 0.136 | -1.21 | 0.007 | -1.2  | 0.068 |
| 1450923_at   | transforming growth factor, beta 2                                             | Tgfb2                    | -1.01 | 0.934 | -1.63 | 0.002 | -1.18 | 0.125 | -1.21 | 0.022 | -1.27 | 0.025 |
| 1422705_at   | transmembrane, prostate androgen induced RNA                                   | Tmepai                   | 1.45  | 0.421 | 1.05  | 0.543 | -1.34 | 0.014 | -1.21 | 0.029 | -1.18 | 0.012 |
| 1447522_s_at | tankyrase, TRF1-interacting ankyrin-related ADP-ribose polymerase 2            | Tnks2                    | -1.2  | 0.364 | -1.23 | 0.314 | -1.02 | 0.678 | -1.21 | 0.046 | -1.12 | 0.272 |
| 1426771_at   | taurine upregulated gene 1                                                     | Tug1                     | -1.07 | 0.473 | -1.19 | 0.055 | -1.03 | 0.710 | -1.21 | 0.046 | -1.31 | 0.091 |
| 1454643_at   | ubiquitin associated protein 2-like                                            | Ubap2l                   | -1.17 | 0.331 | -1.25 | 0.227 | -1.08 | 0.262 | -1.21 | 0.041 | -1.23 | 0.041 |
| 1455094_s_at | ubiquitin-conjugating enzyme E2G 1 (UBC7 homolog, C. elegans)                  | Ube2g1                   | 1.02  | 0.835 | -1.12 | 0.169 | -1.06 | 0.283 | -1.21 | 0.029 | -1.25 | 0.043 |
| 1422759_a_at | exportin 6                                                                     | Xpo6                     | 1.18  | 0.709 | 1.06  | 0.826 | -1.15 | 0.114 | -1.21 | 0.043 | -1.36 | 0.000 |
| 1439411_a_at | exportin 7                                                                     | Xpo7                     | -1.23 | 0.378 | -1.64 | 0.211 | -1.08 | 0.053 | -1.21 | 0.040 | -1.29 | 0.003 |
| 1440999_at   | zinc finger protein 697                                                        | Zfp697                   | 1.16  | 0.470 | 1.01  | 0.896 | -1.12 | 0.132 | -1.21 | 0.003 | -1.2  | 0.104 |
| 1427112_at   | RIKEN cDNA 2700049H19 gene                                                     | 2700049H19Rik            | 3.15  | 0.543 | 3.29  | 0.201 | 1.1   | 0.180 | -1.2  | 0.036 | 1.04  | 0.198 |
| 1451434_s_at | RIKEN cDNA 5430405G24 gene                                                     | 5430405G24Rik            | 1.06  | 0.730 | 1.28  | 0.228 | -1.12 | 0.407 | -1.2  | 0.035 | -1    | 0.893 |
| 1436353_at   | RIKEN cDNA A230046K03 gene                                                     | A230046K03Rik            | -1.15 | 0.068 | 1.02  | 0.768 | -1.21 | 0.094 | -1.2  | 0.001 | 1.02  | 0.804 |
| 1452359_at   | expressed sequence AA536743                                                    | AA536743                 | -1.15 | 0.368 | -1.43 | 0.211 | -1.02 | 0.504 | -1.2  | 0.039 | -1.11 | 0.046 |
| 1451526_at   | Rho GTPase activating protein 12                                               | Arhgap12                 | -1.12 | 0.450 | -1.3  | 0.253 | -1.17 | 0.175 | -1.2  | 0.010 | -1.29 | 0.013 |
| 1436498_at   | ariadne ubiquitin-conjugating enzyme E2 binding protein homolog 1 (Drosophila) | Arih1                    | 1.44  | 0.410 | 1.05  | 0.737 | -1.35 | 0.007 | -1.2  | 0.046 | -1.51 | 0.018 |
| 1454952_s_at | RIKEN cDNA B130055D15 gene                                                     | B130055D15Rik            | -1.11 | 0.490 | -1.14 | 0.384 | -1.03 | 0.559 | -1.2  | 0.016 | -1.05 | 0.434 |
| 1434656_at   | RIKEN cDNA B230339M05 gene                                                     | B230339M05Rik            | 1     | 0.631 | -1.19 | 0.342 | -1.06 | 0.420 | -1.2  | 0.031 | -1.24 | 0.058 |
| 1443899_at   | cDNA sequence BC028799 /// RIKEN cDNA 4922501C03 gene                          | BC028799 /// 49225       | 1.14  | 0.855 | -1.06 | 0.598 | 1.24  | 0.422 | -1.2  | 0.041 | 1.02  | 0.515 |
| 1452381_at   | cAMP responsive element binding protein 3-like 2                               | Creb3l2                  | 1.01  | 0.996 | -1.42 | 0.052 | -1.22 | 0.042 | -1.2  | 0.046 | -1.43 | 0.010 |

|              |                                                                          |                     |       |       |       |       |       |       |      |       |       |       |
|--------------|--------------------------------------------------------------------------|---------------------|-------|-------|-------|-------|-------|-------|------|-------|-------|-------|
| 1453372_at   | DnaJ (Hsp40) homolog, subfamily C, member 1                              | Dnajc1              | 1.05  | 0.384 | -1.35 | 0.013 | -1.38 | 0.031 | -1.2 | 0.010 | -1.51 | 0.009 |
| 1417164_at   | dual specificity phosphatase 10                                          | Dusp10              | -1.02 | 0.615 | 1.01  | 0.682 | -1.17 | 0.069 | -1.2 | 0.011 | -1.11 | 0.133 |
| 1437199_at   | dual specificity phosphatase 5                                           | Dusp5               | -1.05 | 0.880 | -1.21 | 0.082 | -1.02 | 0.856 | -1.2 | 0.014 | 1.01  | 0.619 |
| 1433474_at   | EGF-like repeats and discoidin I-like domains 3                          | Edil3               | -1.13 | 0.248 | -1.27 | 0.077 | -1.13 | 0.115 | -1.2 | 0.024 | -1.35 | 0.015 |
| 1416916_at   | E74-like factor 3                                                        | Elf3                | 1.26  | 0.541 | 1.61  | 0.180 | 1.13  | 0.850 | -1.2 | 0.007 | 1.16  | 0.768 |
| 1448797_at   | ELK3, member of ETS oncogene family                                      | Elk3                | -1.03 | 0.447 | -1.14 | 0.156 | -1.03 | 0.505 | -1.2 | 0.002 | -1.17 | 0.099 |
| 1456378_s_at | F-box and leucine-rich repeat protein 20                                 | Fbxl20              | -1.23 | 0.305 | -1.32 | 0.173 | -1.04 | 0.471 | -1.2 | 0.007 | -1.08 | 0.103 |
| 1424050_s_at | fibroblast growth factor receptor 1                                      | Fgfr1               | -1.25 | 0.071 | -1.24 | 0.207 | -1.07 | 0.361 | -1.2 | 0.040 | -1.01 | 0.893 |
| 1437718_x_at | fibromodulin                                                             | Fmod                | -1.33 | 0.350 | -1.16 | 0.438 | -1    | 0.654 | -1.2 | 0.040 | 1.01  | 0.687 |
| 1453851_a_at | growth arrest and DNA-damage-inducible 45 gamma                          | Gadd45g             | 1.03  | 0.571 | -1.08 | 0.152 | -1.21 | 0.101 | -1.2 | 0.018 | -1.32 | 0.004 |
| 1423267_s_at | integrin alpha 5 (fibronectin receptor alpha)                            | Itga5               | 1.14  | 0.849 | -1.29 | 0.191 | -1.17 | 0.144 | -1.2 | 0.050 | -1.24 | 0.082 |
| 1451783_a_at | kinesin-associated protein 3                                             | Kifap3              | -1.13 | 0.263 | -1.42 | 0.046 | -1.1  | 0.078 | -1.2 | 0.025 | -1.11 | 0.033 |
| 1429005_at   | malignant fibrous histiocytoma amplified sequence 1                      | Mfhas1              | -1.16 | 0.321 | -1.23 | 0.236 | -1.1  | 0.167 | -1.2 | 0.015 | -1.18 | 0.126 |
| 1437055_x_at | Major facilitator superfamily domain containing 1                        | Mfsd1               | -1.27 | 0.255 | -1.13 | 0.618 | 1.2   | 0.621 | -1.2 | 0.028 | 1.21  | 0.042 |
| 1448528_at   | programmed cell death 10                                                 | Pcdcd10             | -1.08 | 0.488 | -1.04 | 0.534 | -1.34 | 0.123 | -1.2 | 0.023 | -1.43 | 0.024 |
| 1434948_at   | RAB11 family interacting protein 2 (class I)                             | Rab11fip2           | 1.22  | 0.425 | 1.36  | 0.493 | 1.03  | 0.713 | -1.2 | 0.025 | -1.04 | 0.708 |
| 1438505_s_at | ribonuclease III, nuclear                                                | Rnasen              | -1.47 | 0.328 | -1.4  | 0.344 | -1.03 | 0.801 | -1.2 | 0.003 | -1    | 0.815 |
| 1426972_at   | SEC24 related gene family, member D (S. cerevisiae)                      | Sec24d              | 1.5   | 0.429 | 1.13  | 0.627 | -1.21 | 0.081 | -1.2 | 0.026 | -1.33 | 0.002 |
| 1454683_at   | splicing factor, arginine/serine-rich 8                                  | Sfrs8               | -1.2  | 0.138 | 1.07  | 0.499 | -1.13 | 0.608 | -1.2 | 0.032 | -1.07 | 0.690 |
| 1423865_at   | solute carrier family 44, member 1                                       | Slc44a1             | -1.23 | 0.117 | -1.07 | 0.491 | 1.16  | 0.424 | -1.2 | 0.003 | 1.01  | 0.949 |
| 1424659_at   | slit homolog 2 (Drosophila)                                              | Slit2               | -1.27 | 0.100 | -1.7  | 0.044 | -1.22 | 0.047 | -1.2 | 0.015 | -1.22 | 0.025 |
| 1421849_at   | stromal antigen 2                                                        | Stag2               | 1.11  | 0.101 | -1.19 | 0.133 | -1.13 | 0.081 | -1.2 | 0.016 | -1.3  | 0.002 |
| 1423535_at   | striatin, calmodulin binding protein 3                                   | Strn3               | 1.07  | 0.353 | -1.03 | 0.634 | -1.23 | 0.015 | -1.2 | 0.005 | -1.24 | 0.071 |
| 1455024_at   | tousled-like kinase 1                                                    | Tlk1                | 1.18  | 0.269 | 1.03  | 0.989 | -1.13 | 0.003 | -1.2 | 0.006 | -1.21 | 0.045 |
| 1435030_at   | UPF2 regulator of nonsense transcripts homolog (yeast)                   | Upf2                | -1.04 | 0.617 | -1.16 | 0.380 | -1.11 | 0.265 | -1.2 | 0.019 | -1.4  | 0.027 |
| 1418479_at   | vacuolar protein sorting 54 (yeast)                                      | Vps54               | 1.05  | 0.658 | -1.17 | 0.013 | -1.23 | 0.003 | -1.2 | 0.023 | -1.35 | 0.019 |
| 1418083_at   | RIKEN cDNA 0610009B22 gene                                               | 0610009B22Rik       | 1.1   | 0.149 | 1.28  | 0.264 | 1.15  | 0.281 | 1.2  | 0.040 | 1.22  | 0.182 |
| 1432848_a_at | RIKEN cDNA 1200004M23 gene                                               | 1200004M23Rik       | 1.57  | 0.351 | 1.87  | 0.146 | 1.08  | 0.391 | 1.2  | 0.001 | 1.11  | 0.107 |
| 1419660_at   | RIKEN cDNA 1600012F09 gene                                               | 1600012F09Rik       | 1.2   | 0.080 | 1.36  | 0.009 | 1.09  | 0.063 | 1.2  | 0.028 | 1.15  | 0.111 |
| 1451334_at   | RIKEN cDNA 1810009O10 gene                                               | 1810009O10Rik       | -1.01 | 0.786 | 1.3   | 0.078 | 1.13  | 0.010 | 1.2  | 0.005 | 1.23  | 0.048 |
| 1435238_x_at | RIKEN cDNA 2310009A05 gene                                               | 2310009A05Rik       | -1.07 | 0.504 | 1.04  | 0.746 | 1.1   | 0.376 | 1.2  | 0.020 | 1.11  | 0.320 |
| 1417218_at   | RIKEN cDNA 2810048G17 gene                                               | 2810048G17Rik       | 1.1   | 0.459 | 1.22  | 0.180 | 1.23  | 0.047 | 1.2  | 0.004 | 1.12  | 0.000 |
| 1428128_at   | RIKEN cDNA 4921506J03 gene                                               | 4921506J03Rik       | -1.06 | 0.484 | 1.14  | 0.236 | 1.11  | 0.021 | 1.2  | 0.019 | 1.18  | 0.029 |
| 1434601_at   | adhesion molecule with Ig like domain 2                                  | Amigo2              | 1.8   | 0.196 | 2.14  | 0.237 | 2.63  | 0.690 | 1.2  | 0.044 | 2.06  | 0.224 |
| 1438661_a_at | ADP-ribosylation factor 2                                                | Arf2                | 1.98  | 0.417 | 1.94  | 0.028 | -1.07 | 0.358 | 1.2  | 0.011 | 1.12  | 0.183 |
| 1439063_at   | additional sex combs like 2 (Drosophila)                                 | Asxl2               | 1.02  | 0.903 | 1.54  | 0.026 | 1.15  | 0.362 | 1.2  | 0.033 | -1.03 | 0.558 |
| 1451246_s_at | aurora kinase B                                                          | Aurkb               | 1.11  | 0.005 | 1.36  | 0.019 | 1.18  | 0.041 | 1.2  | 0.005 | 1.29  | 0.028 |
| 1452628_at   | BCL2-associated athanogene 5                                             | Bag5                | 1.16  | 0.278 | 1.35  | 0.074 | 1.01  | 0.863 | 1.2  | 0.001 | 1.05  | 0.512 |
| 1420632_a_at | Bernardinelli-Seip congenital lipodystrophy 2 homolog (human)            | Bscl2               | -1.15 | 0.255 | -1.04 | 0.591 | -1.05 | 0.510 | 1.2  | 0.015 | 1.01  | 0.647 |
| 1450846_at   | basic leucine zipper and W2 domains 1                                    | Bzwl                | 4.33  | 0.253 | 4.76  | 0.324 | 1.02  | 0.757 | 1.2  | 0.038 | 1.01  | 0.982 |
| 1428759_s_at | coiled-coil domain containing 49                                         | Ccdc49              | 1.3   | 0.436 | 1.49  | 0.059 | -1    | 0.890 | 1.2  | 0.049 | 1.08  | 0.694 |
| 1428131_a_at | CDC42 small effector 1                                                   | Cdc42se1            | -1.1  | 0.226 | -1.03 | 0.578 | 1.08  | 0.255 | 1.2  | 0.036 | 1.13  | 0.135 |
| 1435863_at   | COMM domain containing 6                                                 | Commd6              | 1.44  | 0.059 | 1.63  | 0.012 | 1.12  | 0.038 | 1.2  | 0.044 | 1.26  | 0.012 |
| 1429078_a_at | COP9 (constitutive photomorphogenic) homolog, subunit 7a (Arabidopsis)   | Cops7a              | 1.34  | 0.362 | 1.32  | 0.290 | 1.01  | 0.850 | 1.2  | 0.033 | 1.05  | 0.306 |
| 1433859_at   | RIKEN cDNA D030070L09 gene                                               | D030070L09Rik       | 1.42  | 0.240 | 1.52  | 0.180 | 1.1   | 0.122 | 1.2  | 0.004 | 1.09  | 0.021 |
| 1425228_a_at | deoxyguanosine kinase                                                    | Dguok               | 2.35  | 0.354 | 2.32  | 0.136 | 1.09  | 0.310 | 1.2  | 0.003 | 1.25  | 0.060 |
| 1452797_at   | FAST kinase domains 3                                                    | Fastkd3             | 1.14  | 0.345 | 1.49  | 0.007 | 1.21  | 0.005 | 1.2  | 0.009 | 1.02  | 0.430 |
| 1420374_at   | forkhead box J2                                                          | Foxj2               | -1.24 | 0.347 | -1.15 | 0.377 | 1.17  | 0.420 | 1.2  | 0.001 | 1.12  | 0.182 |
| 1426783_at   | GCN5 general control of amino acid synthesis-like 2 (yeast)              | Gcn5l2              | -1.08 | 0.345 | 1.12  | 0.446 | 1.14  | 0.018 | 1.2  | 0.026 | 1.31  | 0.031 |
| 1435925_at   | G protein-coupled receptor kinase-interactor 2                           | Git2                | -1.04 | 0.573 | 1.01  | 0.802 | 1.01  | 0.824 | 1.2  | 0.032 | 1.11  | 0.242 |
| 1416708_a_at | GRAM domain containing 1A                                                | Gramd1a             | -1.03 | 0.284 | 1.1   | 0.024 | 1.18  | 0.052 | 1.2  | 0.011 | 1.2   | 0.048 |
| 1423382_a_at | heterogeneous nuclear ribonucleoprotein F /// similar to heterogeneous r | Hnrpf /// LOC63700f | 1.83  | 0.327 | 1.86  | 0.222 | 1     | 0.853 | 1.2  | 0.022 | 1.02  | 0.738 |
| 1454996_at   | hydroxysteroid dehydrogenase like 1                                      | Hsd1l               | -1.05 | 0.435 | 1.15  | 0.383 | 1.26  | 0.017 | 1.2  | 0.000 | 1.33  | 0.050 |
| 1419455_at   | interleukin 10 receptor, beta                                            | Il10rb              | 1.67  | 0.199 | 1.91  | 0.049 | 1.28  | 0.128 | 1.2  | 0.002 | 1.31  | 0.001 |
| 1415911_at   | imprinted and ancient                                                    | Impact              | 1.25  | 0.155 | 1.35  | 0.085 | 1.04  | 0.585 | 1.2  | 0.044 | 1.14  | 0.021 |
| 1426111_x_at | interferon regulatory factor 3                                           | Irf3                | -1.12 | 0.280 | -1.09 | 0.258 | -1.01 | 0.630 | 1.2  | 0.008 | 1.08  | 0.040 |
| 1451214_at   | kelch repeat and BTB (POZ) domain containing 2                           | Kbtbd2              | 1.15  | 0.412 | 1.22  | 0.284 | 1.15  | 0.035 | 1.2  | 0.033 | 1.05  | 0.285 |
| 1416106_at   | KTI12 homolog, chromatin associated (S. cerevisiae)                      | Kti12               | 1.11  | 0.270 | 1.43  | 0.013 | 1.16  | 0.005 | 1.2  | 0.008 | 1.22  | 0.013 |

|              |                                                                                                   |               |       |       |       |       |       |       |      |       |       |       |
|--------------|---------------------------------------------------------------------------------------------------|---------------|-------|-------|-------|-------|-------|-------|------|-------|-------|-------|
| 1450204_a_at | myoneurin                                                                                         | Mynn          | 1.2   | 0.321 | 1.22  | 0.089 | 1.1   | 0.963 | 1.2  | 0.042 | -1.04 | 0.660 |
| 1419666_x_at | nuclear protein 1                                                                                 | Nupr1         | 1.33  | 0.310 | 1.16  | 0.663 | 1.06  | 0.433 | 1.2  | 0.010 | 1.01  | 0.957 |
| 1422488_at   | NTF2-related export protein 1                                                                     | Nxt1          | 1     | 0.969 | 1.29  | 0.020 | 1.11  | 0.019 | 1.2  | 0.042 | 1.1   | 0.390 |
| 1419760_a_at | open reading frame 5                                                                              | ORF5          | -1.11 | 0.347 | 1.04  | 0.717 | 1.05  | 0.640 | 1.2  | 0.035 | 1.1   | 0.061 |
| 1450630_at   | queuine tRNA-ribosyltransferase 1                                                                 | Qtrt1         | 1.31  | 0.241 | 1.39  | 0.014 | 1.11  | 0.759 | 1.2  | 0.024 | 1.26  | 0.106 |
| 1429528_at   | RAE1 RNA export 1 homolog (S. pombe)                                                              | Rae1          | 2.41  | 0.293 | 2.69  | 0.217 | 1.09  | 0.387 | 1.2  | 0.026 | 1.1   | 0.313 |
| 1426426_at   | RNA binding motif protein 13                                                                      | Rbm13         | 1.14  | 0.266 | 1.39  | 0.052 | 1.15  | 0.030 | 1.2  | 0.008 | 1.2   | 0.017 |
| 1418859_at   | regulatory factor X-associated protein                                                            | Rfxap         | 1.01  | 0.612 | 1.27  | 0.032 | 1.05  | 0.637 | 1.2  | 0.000 | 1.08  | 0.201 |
| 1422668_at   | serine (or cysteine) peptidase inhibitor, clade B, member 9b                                      | Serpib9b      | 1.2   | 0.069 | 1.2   | 0.156 | 1.22  | 0.202 | 1.2  | 0.009 | 1.17  | 0.115 |
| 1448132_at   | solute carrier family 19 (sodium/hydrogen exchanger), member 1                                    | Slc19a1       | 1.85  | 0.455 | 2.16  | 0.165 | 1.13  | 0.572 | 1.2  | 0.030 | 1.26  | 0.087 |
| 1436007_a_at | THUMP domain containing 1                                                                         | Thumpd1       | 1.81  | 0.548 | 2.13  | 0.234 | 1.11  | 0.278 | 1.2  | 0.050 | 1.05  | 0.129 |
| 1416346_at   | translocase of inner mitochondrial membrane 8 homolog a1 (yeast)                                  | Timm8a1       | 1.14  | 0.110 | 1.36  | 0.014 | 1.14  | 0.003 | 1.2  | 0.006 | 1.16  | 0.141 |
| 1454836_at   | transmembrane protein 18                                                                          | Tmem18        | 1.03  | 0.718 | 1.17  | 0.156 | 1.18  | 0.136 | 1.2  | 0.026 | 1.24  | 0.009 |
| 1454861_at   | taxilin alpha                                                                                     | Txlna         | 1.01  | 0.906 | 1.32  | 0.068 | 1.18  | 0.089 | 1.2  | 0.006 | 1.26  | 0.004 |
| 1435824_at   | YY1 transcription factor                                                                          | Yy1           | -1.02 | 0.725 | -1.1  | 0.317 | 1.04  | 0.451 | 1.2  | 0.003 | 1.05  | 0.189 |
| 1451277_at   | zinc binding alcohol dehydrogenase, domain containing 2                                           | Zadh2         | -1.03 | 0.595 | 1.13  | 0.515 | 1.26  | 0.005 | 1.2  | 0.032 | 1.22  | 0.076 |
| 1457285_at   | zinc finger protein 187                                                                           | Zfp187        | 1.33  | 0.116 | 1.58  | 0.070 | 1.2   | 0.088 | 1.2  | 0.016 | 1.25  | 0.011 |
| 1424892_at   | zinc finger protein 95                                                                            | Zfp95         | 1.17  | 0.399 | 1.53  | 0.031 | 1.25  | 0.032 | 1.2  | 0.031 | 1.47  | 0.023 |
| 1428593_at   | RIKEN cDNA 1700029F09 gene                                                                        | 1700029F09Rik | 1.06  | 0.328 | 1.19  | 0.125 | 1.16  | 0.044 | 1.21 | 0.035 | 1.14  | 0.036 |
| 1435076_at   | RIKEN cDNA 2310047D13 gene                                                                        | 2310047D13Rik | 1.2   | 0.442 | 1.31  | 0.162 | 1.25  | 0.025 | 1.21 | 0.009 | 1.05  | 0.487 |
| 1416439_at   | RIKEN cDNA 2410015N17 gene                                                                        | 2410015N17Rik | 1.13  | 0.046 | 1.36  | 0.032 | 1.15  | 0.232 | 1.21 | 0.016 | 1.26  | 0.148 |
| 1455878_at   | RIKEN cDNA 2700023E23 gene                                                                        | 2700023E23Rik | 1.04  | 0.772 | 1.03  | 0.992 | 1.04  | 0.581 | 1.21 | 0.021 | 1.11  | 0.364 |
| 1434870_at   | RIKEN cDNA 2810004N23 gene                                                                        | 2810004N23Rik | -1.06 | 0.490 | 1.09  | 0.885 | 1.08  | 0.555 | 1.21 | 0.014 | 1.09  | 0.386 |
| 1453028_at   | RIKEN cDNA 4631424J17 gene                                                                        | 4631424J17Rik | 1.72  | 0.142 | 2.19  | 0.094 | 1.18  | 0.033 | 1.21 | 0.020 | 1     | 0.852 |
| 1437089_at   | RIKEN cDNA 4833409A17 gene                                                                        | 4833409A17Rik | 1.2   | 0.077 | 1.03  | 0.820 | 1.2   | 0.735 | 1.21 | 0.009 | -1.02 | 0.544 |
| 1454621_s_at | RIKEN cDNA 5730472N09 gene                                                                        | 5730472N09Rik | 1.21  | 0.373 | 1.33  | 0.349 | 1.08  | 0.435 | 1.21 | 0.026 | 1.08  | 0.613 |
| 1428457_at   | RIKEN cDNA 5830472M02 gene                                                                        | 5830472M02Rik | 1.29  | 0.161 | 1.57  | 0.024 | 1.18  | 0.058 | 1.21 | 0.005 | 1.24  | 0.016 |
| 1442093_at   | Arginine decarboxylase                                                                            | Adc           | -1.05 | 0.449 | 1.07  | 0.463 | -1.01 | 0.804 | 1.21 | 0.029 | 1.41  | 0.373 |
| 1434544_at   | bolA-like 2 (E. coli)                                                                             | Bola2         | 1.02  | 0.825 | 1.01  | 0.750 | 1.19  | 0.121 | 1.21 | 0.009 | 1.09  | 0.487 |
| 1452414_s_at | coiled-coil domain containing 86                                                                  | Ccdc86        | 1.2   | 0.320 | 1.66  | 0.012 | 1.11  | 0.228 | 1.21 | 0.028 | 1.3   | 0.066 |
| 1424638_at   | cyclin-dependent kinase inhibitor 1A (P21)                                                        | Cdkn1a        | 1.16  | 0.333 | 1.69  | 0.005 | 1.25  | 0.005 | 1.21 | 0.002 | 1.29  | 0.003 |
| 1454641_at   | CGG triplet repeat binding protein 1                                                              | Cggbp1        | -1.02 | 0.715 | 1.08  | 0.264 | 1.15  | 0.244 | 1.21 | 0.020 | 1.16  | 0.014 |
| 1455723_at   | DNA segment, Chr 1, ERATO Doi 448, expressed                                                      | D1Ert448e     | 1.95  | 0.648 | 2.24  | 0.125 | 1.33  | 0.060 | 1.21 | 0.018 | 1.23  | 0.046 |
| 1455757_at   | DNA segment, Chr 3, ERATO Doi 254, expressed                                                      | D3Ert254e     | 1.11  | 0.415 | 1.28  | 0.212 | 1.01  | 0.935 | 1.21 | 0.019 | 1.21  | 0.048 |
| 1417506_at   | geminin                                                                                           | Gmn           | 1.06  | 0.876 | 1.21  | 0.429 | 1.24  | 0.081 | 1.21 | 0.015 | 1.13  | 0.027 |
| 1424617_at   | interferon-induced protein 35                                                                     | Iifi35        | 2.33  | 0.156 | 2.85  | 0.106 | 1.01  | 0.849 | 1.21 | 0.044 | 1.13  | 0.510 |
| 1417064_at   | jagunal homolog 1 (Drosophila)                                                                    | Jagn1         | 1.42  | 0.463 | 1.46  | 0.106 | 1.08  | 0.373 | 1.21 | 0.024 | 1.05  | 0.399 |
| 1450747_at   | kelch-like ECH-associated protein 1                                                               | Keap1         | 2.39  | 0.403 | 3.27  | 0.287 | 1.16  | 0.364 | 1.21 | 0.027 | -1.01 | 0.891 |
| 1416621_at   | lethal giant larvae homolog 1 (Drosophila)                                                        | Lgl1          | -1.19 | 0.302 | -1.05 | 0.515 | 1.09  | 0.071 | 1.21 | 0.018 | 1.14  | 0.202 |
| 1442246_at   | hypothetical protein LOC668224 /// hypothetical protein LOC669738 /// h LOC668224 /// LOC         |               | -2.16 | 0.143 | -1.48 | 0.258 | -1.27 | 0.328 | 1.21 | 0.035 | 3.31  | 0.268 |
| 1429176_at   | leucine rich repeat and sterile alpha motif containing 1                                          | Lrsam1        | 1.98  | 0.183 | 1.68  | 0.138 | 1.25  | 0.577 | 1.21 | 0.009 | 1.65  | 0.034 |
| 1437630_at   | large subunit GTPase 1 homolog (S. cerevisiae)                                                    | Lsg1          | 1.41  | 0.295 | 1.57  | 0.054 | 1.05  | 0.633 | 1.21 | 0.049 | 1.05  | 0.340 |
| 1424001_at   | Mki67 (FHA domain) interacting nucleolar phosphoprotein                                           | Mki67ip       | 1.16  | 0.375 | 1.38  | 0.030 | 1.1   | 0.013 | 1.21 | 0.019 | 1.15  | 0.120 |
| 1419272_at   | myeloid differentiation primary response gene 88                                                  | Myd88         | 1.2   | 0.295 | 1.43  | 0.068 | 1.18  | 0.166 | 1.21 | 0.002 | 1.16  | 0.077 |
| 1436189_at   | NAD(P)H dehydrogenase, quinone 2                                                                  | Nqo2          | 1.42  | 0.175 | 1.6   | 0.242 | 1.65  | 0.006 | 1.21 | 0.001 | 1.34  | 0.790 |
| 1422034_a_at | paralemmin                                                                                        | Palm          | 1.01  | 0.980 | -1.02 | 0.907 | 1.03  | 0.865 | 1.21 | 0.014 | 1.07  | 0.096 |
| 1427241_at   | poly(A) polymerase gamma                                                                          | Papog         | 1.08  | 0.814 | 1.18  | 0.040 | -1.02 | 0.755 | 1.21 | 0.012 | 1.1   | 0.499 |
| 1444288_at   | polyribonucleotide nucleotidyltransferase 1                                                       | Pnpt1         | 1.74  | 0.561 | 1.57  | 0.322 | 1.79  | 0.742 | 1.21 | 0.000 | -3.01 | 0.595 |
| 1424473_at   | polymerase (RNA) II (DNA directed) polypeptide H                                                  | Polr2h        | 1.25  | 0.115 | 1.58  | 0.000 | 1.27  | 0.005 | 1.21 | 0.041 | 1.22  | 0.054 |
| 1431506_s_at | peptidyl prolyl isomerase H /// similar to peptidyl prolyl isomerase H /// sir Ppih /// LOC433064 | Ppih          | 1.61  | 0.164 | 1.73  | 0.048 | 1.09  | 0.245 | 1.21 | 0.013 | 1.04  | 0.680 |
| 1428892_at   | peptidylprolyl isomerase (cyclophilin)-like 1                                                     | Ppil1         | 1.1   | 0.453 | 1.27  | 0.027 | 1.03  | 0.776 | 1.21 | 0.027 | 1.05  | 0.063 |
| 1418181_at   | protein tyrosine phosphatase 4a3                                                                  | Ptp4a3        | 1.66  | 0.306 | 2.48  | 0.035 | 1.24  | 0.080 | 1.21 | 0.045 | 1.38  | 0.036 |
| 1419061_at   | ras homolog gene family, member D                                                                 | Rhod          | 1.33  | 0.344 | 2.09  | 0.012 | 1.26  | 0.021 | 1.21 | 0.009 | 1.5   | 0.005 |
| 1439780_at   | ribosomal protein L7-like 1                                                                       | Rpl7l1        | 1.03  | 0.777 | 1.18  | 0.891 | 1.23  | 0.006 | 1.21 | 0.049 | 1.28  | 0.048 |
| 1428133_at   | Smad nuclear interacting protein 1                                                                | Snip1         | 1.22  | 0.206 | 1.33  | 0.121 | 1.18  | 0.423 | 1.21 | 0.025 | 1.11  | 0.131 |
| 1460743_at   | tigger transposable element derived 5                                                             | Tigd5         | 1.48  | 0.170 | 1.1   | 0.598 | 1.2   | 0.644 | 1.21 | 0.049 | 1.28  | 0.541 |
| 1431789_s_at | transmembrane emp24 protein transport domain containing 5                                         | Tmed5         | 5.26  | 0.312 | 4.91  | 0.582 | 1.04  | 0.564 | 1.21 | 0.006 | -1    | 0.776 |
| 1455116_at   | tumor necrosis factor receptor superfamily, member 19-like /// similar to TNFRSF19 /// LOC671     |               | 1.07  | 0.920 | 1.29  | 0.271 | 1.28  | 0.054 | 1.21 | 0.023 | 1.15  | 0.223 |

|              |                                                                              |                     |       |       |       |       |       |       |      |       |       |       |
|--------------|------------------------------------------------------------------------------|---------------------|-------|-------|-------|-------|-------|-------|------|-------|-------|-------|
| 1435202_at   | zinc finger protein 574                                                      | Zfp574              | 1.05  | 0.865 | 1.21  | 0.617 | 1.35  | 0.083 | 1.21 | 0.039 | 1.28  | 0.049 |
| 1449546_a_at | zinc finger protein 617                                                      | Zfp617              | 1.09  | 0.014 | 1.32  | 0.194 | 1.17  | 0.051 | 1.21 | 0.003 | 1.16  | 0.171 |
| 1423224_at   | RIKEN cDNA 4432405B04 gene                                                   | 4432405B04Rik       | 1.09  | 0.665 | -1.22 | 0.265 | 1.04  | 0.828 | 1.22 | 0.013 | 1.03  | 0.911 |
| 1452340_at   | RIKEN cDNA 6820424L24 gene                                                   | 6820424L24Rik       | -1.01 | 0.325 | 1.11  | 0.165 | 1.17  | 0.129 | 1.22 | 0.026 | 1.22  | 0.058 |
| 1428275_at   | abhydrolase domain containing 13                                             | Abhd13              | 1.01  | 0.818 | 1.26  | 0.075 | 1.08  | 0.325 | 1.22 | 0.003 | 1.2   | 0.047 |
| 1457606_x_at | expressed sequence AU015228                                                  | AU015228            | 1.67  | 0.175 | 1.22  | 0.368 | 1.56  | 0.322 | 1.22 | 0.009 | 2.13  | 0.161 |
| 1455166_at   | expressed sequence AW146430                                                  | AW146430            | 1.12  | 0.140 | 1.03  | 0.600 | 1.18  | 0.041 | 1.22 | 0.005 | 1.09  | 0.212 |
| 1426083_a_at | B-cell translocation gene 1, anti-proliferative                              | Btg1                | -1.03 | 0.604 | 1.19  | 0.033 | 1.3   | 0.018 | 1.22 | 0.035 | 1.37  | 0.011 |
| 1452829_at   | carbamoyl-phosphate synthetase 2, aspartate transcarbamylase, and di         | Cad                 | 1.26  | 0.510 | 1.4   | 0.202 | 1.1   | 0.080 | 1.22 | 0.005 | 1.13  | 0.331 |
| 1454733_at   | caspase recruitment domain 4                                                 | Card4               | 2.45  | 0.635 | 2.67  | 0.568 | 1.05  | 0.529 | 1.22 | 0.024 | 1.05  | 0.748 |
| 1424143_a_at | chromatin licensing and DNA replication factor 1                             | Cdt1                | -1.13 | 0.390 | 1.17  | 0.640 | 1.2   | 0.025 | 1.22 | 0.031 | 1.24  | 0.017 |
| 1424495_a_at | chemokine-like factor                                                        | Cklf                | 1.16  | 0.107 | 1.19  | 0.115 | 1.19  | 0.071 | 1.22 | 0.017 | 1.17  | 0.236 |
| 1454935_at   | RIKEN cDNA D930001I22 gene                                                   | D930001I22Rik       | -1.1  | 0.401 | 1.11  | 0.656 | 1.07  | 0.511 | 1.22 | 0.026 | 1.13  | 0.207 |
| 1417903_at   | deafness, autosomal dominant 5 homolog (human)                               | Dfna5h              | 4.55  | 0.518 | 2.12  | 0.879 | 1.45  | 0.081 | 1.22 | 0.035 | 1.11  | 0.768 |
| 1456502_at   | dual-specificity tyrosine-(Y)-phosphorylation regulated kinase 2             | Dyrk2               | 1.12  | 0.086 | 1.02  | 0.714 | 1.02  | 0.661 | 1.22 | 0.007 | 1.08  | 0.208 |
| 1450934_at   | eukaryotic translation initiation factor 4A2                                 | Eif4a2              | 1.41  | 0.317 | 1.51  | 0.459 | 1.14  | 0.164 | 1.22 | 0.028 | 1.03  | 0.712 |
| 1417699_at   | general transcription factor IIF, polypeptide 1                              | Gtf2f1              | 1.92  | 0.614 | 2.12  | 0.120 | 1.11  | 0.086 | 1.22 | 0.043 | 1.05  | 0.434 |
| 1448679_at   | hyaluronoglucosaminidase 2                                                   | Hyal2               | -1.15 | 0.045 | 1.08  | 0.095 | 1.08  | 0.744 | 1.22 | 0.045 | 1.48  | 0.016 |
| 1418956_at   | potassium voltage-gated channel, shaker-related subfamily, beta membe        | Kcnab2              | -1.05 | 0.313 | -1.65 | 0.169 | 2.01  | 0.832 | 1.22 | 0.039 | -1.04 | 0.919 |
| 1437226_x_at | MARCKS-like 1                                                                | Marcks1             | 1.07  | 0.012 | 1.46  | 0.000 | 1.24  | 0.000 | 1.22 | 0.019 | 1.28  | 0.076 |
| 1420845_at   | mitochondrial ribosomal protein S2                                           | Mrps2               | 11.34 | 0.299 | 12.33 | 0.089 | 1.01  | 0.890 | 1.22 | 0.011 | 1.15  | 0.269 |
| 1417483_at   | nuclear factor of kappa light polypeptide gene enhancer in B-cells inhibi    | Nfkbia              | 1     | 0.723 | 1.28  | 0.164 | 1.5   | 0.016 | 1.22 | 0.030 | 1.37  | 0.034 |
| 1450147_at   | neuronal pentraxin receptor                                                  | Nptxr               | -1.11 | 0.319 | 1.06  | 0.913 | -1.03 | 0.665 | 1.22 | 0.046 | -1    | 0.977 |
| 1450854_at   | proliferation-associated 2G4                                                 | Pa2g4               | 1.36  | 0.424 | 1.99  | 0.188 | 1.12  | 0.754 | 1.22 | 0.018 | 1.18  | 0.001 |
| 1428228_at   | phosphoglucomutase 3                                                         | Pgm3                | 1.15  | 0.379 | -1.01 | 0.895 | 1.05  | 0.636 | 1.22 | 0.043 | 1.07  | 0.353 |
| 1424671_at   | pleckstrin homology domain containing, family F (with FYVE domain) me        | Pleckh1             | 1.03  | 0.997 | 1.17  | 0.091 | 1.09  | 0.289 | 1.22 | 0.016 | 1.13  | 0.108 |
| 1418203_at   | phorbol-12-myristate-13-acetate-induced protein 1                            | Pmaip1              | 1.33  | 0.093 | 2.85  | 0.020 | 1.42  | 0.015 | 1.22 | 0.008 | 1.68  | 0.090 |
| 1426838_at   | polymerase (DNA-directed), delta 3, accessory subunit                        | Pold3               | -1.03 | 0.616 | 1.19  | 0.967 | 1.22  | 0.339 | 1.22 | 0.002 | 1.08  | 0.497 |
| 1448899_s_at | RAD51 associated protein 1                                                   | Rad51ap1            | 1.21  | 0.064 | 1.38  | 0.022 | 1.06  | 0.392 | 1.22 | 0.033 | 1.21  | 0.029 |
| 1426968_a_at | retinol dehydrogenase 10 (all-trans)                                         | Rdh10               | 1.14  | 0.315 | 1.33  | 0.244 | 1.16  | 0.048 | 1.22 | 0.021 | 1.18  | 0.143 |
| 1456383_at   | ribosomal L1 domain containing 1                                             | Rsl1d1              | 1.86  | 0.233 | 2.16  | 0.059 | 1.06  | 0.340 | 1.22 | 0.001 | 1.12  | 0.443 |
| 1428496_at   | SECIS binding protein 2                                                      | Secisbp2            | 1.02  | 0.815 | 1.21  | 0.189 | 1.03  | 0.484 | 1.22 | 0.023 | 1.02  | 0.793 |
| 1447573_at   | Solute carrier family 32 (GABA vesicular transporter), member 1              | Slc32a1             | 1.01  | 0.999 | -1.11 | 0.281 | -1.22 | 0.323 | 1.22 | 0.036 | 1.04  | 0.592 |
| 1449959_x_at | small proline rich-like 9                                                    | Sprrl9              | -1.16 | 0.390 | -1.12 | 0.342 | 1.28  | 0.094 | 1.22 | 0.011 | 1.25  | 0.292 |
| 1420509_at   | serum response factor binding protein 1                                      | Srfbp1              | 1.29  | 0.527 | 1.49  | 0.222 | -1.01 | 0.789 | 1.22 | 0.043 | -1.07 | 0.370 |
| 1437283_at   | transportin 2 (importin 3, karyopherin beta 2b)                              | Tnpo2               | 2.46  | 0.342 | 2.46  | 0.473 | 1.15  | 0.228 | 1.22 | 0.012 | 1.1   | 0.595 |
| 1423176_at   | transducer of ErbB-2.1                                                       | Tob1                | 1.01  | 0.995 | 1.32  | 0.013 | 1.56  | 0.016 | 1.22 | 0.039 | 1.63  | 0.000 |
| 1452374_at   | zinc finger protein 322a                                                     | Zfp322a             | -1.05 | 0.595 | 1.09  | 0.931 | 1.2   | 0.130 | 1.22 | 0.007 | 1.02  | 0.996 |
| 1433946_at   | zinc finger protein interacting with K protein 1                             | Zik1                | 1.13  | 0.031 | 1.44  | 0.041 | 1.36  | 0.002 | 1.22 | 0.041 | 1.23  | 0.015 |
| 1438205_at   | RIKEN cDNA 1110014N23 gene                                                   | 1110014N23Rik       | 1.94  | 0.315 | 2.24  | 0.301 | -1.13 | 0.437 | 1.23 | 0.023 | 1.27  | 0.262 |
| 1429243_at   | RIKEN cDNA 1110054O05 gene                                                   | 1110054O05Rik       | 1.13  | 0.320 | 1.33  | 0.223 | 1.03  | 0.883 | 1.23 | 0.047 | 1.2   | 0.461 |
| 1447063_at   | RIKEN cDNA 1700017B05 gene                                                   | 1700017B05Rik       | 1.08  | 0.529 | 1.21  | 0.202 | 1.06  | 0.560 | 1.23 | 0.036 | 1.13  | 0.202 |
| 1447572_at   | RIKEN cDNA 1700052I22 gene                                                   | 1700052I22Rik       | 1.72  | 0.975 | 1.18  | 0.650 | 1.67  | 0.885 | 1.23 | 0.036 | 2.12  | 0.034 |
| 1418996_a_at | RIKEN cDNA 4930469P12 gene                                                   | 4930469P12Rik       | 1.14  | 0.118 | 1.19  | 0.201 | 1.18  | 0.037 | 1.23 | 0.011 | 1.24  | 0.037 |
| 1423072_at   | RIKEN cDNA 6720475J19 gene /// similar to putative retrovirus-related g      | 6720475J19Rik /// L | -1.05 | 0.636 | 1.11  | 0.443 | 1.09  | 0.684 | 1.23 | 0.029 | 1.28  | 0.027 |
| 1455616_at   | expressed sequence A1586002                                                  | A1586002            | 1.12  | 0.506 | 1.36  | 0.926 | 1.21  | 0.100 | 1.23 | 0.014 | -1.02 | 0.438 |
| 1451131_at   | ADP-ribosylation factor-like 6 interacting protein 1                         | Ar16ip1             | -1.01 | 0.788 | 1.03  | 0.361 | 1     | 0.722 | 1.23 | 0.030 | 1.14  | 0.196 |
| 1416227_at   | actin related protein 2/3 complex, subunit 1B /// similar to Actin-related p | Arpc1b /// LOC4347  | -1.21 | 0.266 | 1.14  | 0.249 | 1.53  | 0.071 | 1.23 | 0.034 | 1.44  | 0.222 |
| 1451747_a_at | autophagy-related 12 (yeast)                                                 | Atg12               | 1.05  | 0.129 | 1.35  | 0.001 | 1.16  | 0.287 | 1.23 | 0.038 | 1.04  | 0.701 |
| 1437879_at   | expressed sequence AU045404                                                  | AU045404            | 1.14  | 0.468 | 1.12  | 0.664 | 1.07  | 0.073 | 1.23 | 0.015 | 1.02  | 0.980 |
| 1451583_a_at | cDNA sequence BC025076                                                       | BC025076            | 1.56  | 0.135 | 1.75  | 0.191 | 1.15  | 0.287 | 1.23 | 0.036 | 1.23  | 0.092 |
| 1429784_at   | RIKEN cDNA C130032J12 gene                                                   | C130032J12Rik       | 1.07  | 0.429 | 1.09  | 0.554 | 1.03  | 0.875 | 1.23 | 0.042 | 1     | 0.976 |
| 1427844_a_at | CCAAT/enhancer binding protein (C/EBP), beta                                 | Cebpb               | 1.54  | 0.581 | 1.28  | 0.451 | -1.24 | 0.008 | 1.23 | 0.034 | 1.13  | 0.042 |
| 1423233_at   | CCAAT/enhancer binding protein (C/EBP), delta                                | Cebpd               | -1.06 | 0.480 | 1.13  | 0.515 | 1.21  | 0.266 | 1.23 | 0.048 | 1.18  | 0.267 |
| 1454112_a_at | centrosomal protein 27                                                       | Cep27               | 1.33  | 0.301 | 1.78  | 0.045 | 1.09  | 0.276 | 1.23 | 0.045 | 1.13  | 0.567 |
| 1440715_s_at | DNA segment, Chr 11, ERATO Doi 497, expressed                                | D11Erd497e          | 1.11  | 0.029 | 1.12  | 0.086 | 1.19  | 0.001 | 1.23 | 0.004 | 1.1   | 0.081 |
| 1447805_s_at | DNA segment, Chr 11, ERATO Doi 730, expressed                                | D11Erd730e          | -1.16 | 0.158 | 1.11  | 0.952 | 1.14  | 0.068 | 1.23 | 0.017 | 1.11  | 0.867 |
| 1437284_at   | frizzled homolog 1 (Drosophila)                                              | Fzd1                | 1.03  | 0.393 | 1.27  | 0.017 | 1.34  | 0.060 | 1.23 | 0.012 | 1.39  | 0.042 |

|              |                                                                                        |                     |       |       |       |       |       |       |      |       |       |       |
|--------------|----------------------------------------------------------------------------------------|---------------------|-------|-------|-------|-------|-------|-------|------|-------|-------|-------|
| 1455904_at   | growth arrest specific 5                                                               | Gas5                | 1.01  | 0.711 | -1.03 | 0.544 | 1.22  | 0.002 | 1.23 | 0.038 | 1.1   | 0.140 |
| 1426995_a_at | growth factor, erv1 (S. cerevisiae)-like (augmenter of liver regeneration)             | Gfer                | -1.03 | 0.547 | 1.49  | 0.079 | 1.08  | 0.277 | 1.23 | 0.050 | 1.38  | 0.077 |
| 1426523_a_at | glucosamine-6-phosphate deaminase 2                                                    | Gnpda2              | 1.07  | 0.020 | 1.24  | 0.052 | 1.05  | 0.474 | 1.23 | 0.024 | 1.24  | 0.065 |
| 1452774_at   | heterogeneous nuclear ribonucleoprotein A3                                             | Hnrpa3              | -1.03 | 0.610 | -1.19 | 0.396 | 1.12  | 0.203 | 1.23 | 0.008 | 1.09  | 0.367 |
| 1434012_at   | integrator complex subunit 5                                                           | Ints5               | -1.12 | 0.015 | 1.14  | 0.024 | 1.14  | 0.242 | 1.23 | 0.007 | 1.13  | 0.341 |
| 1449503_at   | karyopherin (importin) alpha 1                                                         | Kpna1               | 1.19  | 0.222 | 1.24  | 0.138 | 1.07  | 0.325 | 1.23 | 0.041 | 1.03  | 0.737 |
| 1451464_at   | microfibrillar-associated protein 3                                                    | Mfap3               | 3.26  | 0.352 | 3.67  | 0.062 | 1.2   | 0.333 | 1.23 | 0.049 | 1.05  | 0.801 |
| 1423711_at   | NADH dehydrogenase (ubiquinone) 1 alpha subcomplex, assembly factor                    | Ndufaf1             | 1.4   | 0.318 | 1.77  | 0.017 | 1.19  | 0.003 | 1.23 | 0.020 | 1.29  | 0.019 |
| 1449474_a_at | nasal embryonic LHRH factor                                                            | Nelf                | -1.09 | 0.226 | -1.05 | 0.555 | 1.12  | 0.537 | 1.23 | 0.033 | 1.23  | 0.148 |
| 1424019_at   | nucleolar protein 1                                                                    | Nol1                | 1.04  | 0.555 | 1.38  | 0.009 | 1.06  | 0.631 | 1.23 | 0.025 | 1.19  | 0.092 |
| 1423864_at   | nuclear receptor binding protein                                                       | Nrbp                | 1.59  | 0.259 | 1.54  | 0.517 | 1.15  | 0.088 | 1.23 | 0.021 | 1.02  | 0.876 |
| 1449017_at   | nuclear transport factor 2                                                             | Nutf2               | 1.22  | 0.263 | 1.52  | 0.011 | 1.16  | 0.093 | 1.23 | 0.004 | 1.24  | 0.002 |
| 1451069_at   | proviral integration site 3                                                            | Pim3                | 1.91  | 0.665 | 1.61  | 0.611 | 1.12  | 0.380 | 1.23 | 0.031 | 1.24  | 0.006 |
| 1430780_a_at | phosphomannomutase 1                                                                   | Pmm1                | 2.06  | 0.315 | 2.45  | 0.022 | 1.05  | 0.769 | 1.23 | 0.004 | 1.17  | 0.012 |
| 1435057_x_at | polymerase (RNA) I polypeptide E                                                       | Polr1e              | -1.01 | 0.702 | 1.34  | 0.371 | 1.13  | 0.055 | 1.23 | 0.049 | 1.38  | 0.028 |
| 1417972_s_at | processing of precursor 5, ribonuclease P/MRP family (S. cerevisiae)                   | Pop5                | 1.1   | 0.342 | 1.58  | 0.003 | 1.17  | 0.038 | 1.23 | 0.015 | 1.38  | 0.016 |
| 1449092_at   | protein phosphatase 1D magnesium-dependent, delta isoform                              | Ppm1d               | -1.03 | 0.558 | 1.5   | 0.007 | 1.16  | 0.026 | 1.23 | 0.015 | 1.29  | 0.024 |
| 1430979_a_at | peroxiredoxin 2                                                                        | Prdx2               | 1.14  | 0.487 | 1.43  | 0.068 | 1.13  | 0.137 | 1.23 | 0.001 | 1.38  | 0.004 |
| 1452062_at   | phosphoribosyl pyrophosphate synthetase-associated protein 2                           | Prpsap2             | 1.04  | 0.966 | 1.45  | 0.043 | 1.06  | 0.724 | 1.23 | 0.032 | -1.1  | 0.203 |
| 1454142_a_at | PWP1 homolog (S. cerevisiae)                                                           | Pwp1                | 4.25  | 0.393 | 5.69  | 0.133 | 1.14  | 0.161 | 1.23 | 0.027 | 1.14  | 0.290 |
| 1417035_at   | SAC3 domain containing 1                                                               | Sac3d1              | 1.04  | 0.715 | 1.36  | 0.026 | 1.23  | 0.034 | 1.23 | 0.023 | 1.28  | 0.048 |
| 1448874_a_at | SH2B adaptor protein 1                                                                 | SH2b1               | 1.35  | 0.280 | 1.64  | 0.114 | 1.19  | 0.028 | 1.23 | 0.020 | 1.27  | 0.058 |
| 1460168_at   | stem-loop binding protein                                                              | Slbp                | 1.2   | 0.071 | 1.73  | 0.002 | 1.27  | 0.009 | 1.23 | 0.002 | 1.28  | 0.092 |
| 1416421_a_at | Sjogren syndrome antigen B                                                             | Ssb                 | 1.19  | 0.316 | 1.35  | 0.040 | 1.06  | 0.815 | 1.23 | 0.009 | 1.09  | 0.600 |
| 1421469_a_at | signal transducer and activator of transcription 5A                                    | Stat5a              | 2.21  | 0.224 | 2.57  | 0.087 | 1.11  | 0.409 | 1.23 | 0.025 | 1.42  | 0.067 |
| 1447159_at   | Synaptic nuclear envelope 2                                                            | Syne2               | 1.44  | 0.440 | 1.05  | 0.897 | 1.35  | 0.050 | 1.23 | 0.023 | -1.18 | 0.460 |
| 1452605_at   | threonine synthase-like 1 (bacterial)                                                  | Thnsl1              | 2.63  | 0.335 | 2.8   | 0.103 | 1.11  | 0.551 | 1.23 | 0.035 | 1.08  | 0.395 |
| 1422740_at   | tumor necrosis factor receptor superfamily, member 21                                  | Tnfrsf21            | -1.23 | 0.094 | -1.32 | 0.160 | 1.24  | 0.131 | 1.23 | 0.001 | 1.36  | 0.589 |
| 1417755_at   | topoisomerase I binding, arginine/serine-rich                                          | Topors              | 1.03  | 0.814 | 1.14  | 0.477 | -1.1  | 0.223 | 1.23 | 0.049 | 1.17  | 0.268 |
| 1454846_at   | UTP15, U3 small nucleolar ribonucleoprotein, homolog (yeast)                           | Utp15               | -1.08 | 0.475 | 1.21  | 0.151 | 1.24  | 0.003 | 1.23 | 0.010 | 1.23  | 0.038 |
| 1453034_at   | zinc finger protein 251                                                                | Zfp251              | 1.09  | 0.999 | 1.3   | 0.558 | 1.08  | 0.552 | 1.23 | 0.035 | 1.36  | 0.049 |
| 1435556_at   | zinc finger protein 597                                                                | Zfp597              | -1.11 | 0.234 | 1.08  | 0.715 | 1.07  | 0.543 | 1.23 | 0.020 | 1     | 0.919 |
| 1424670_s_at | zinc finger, FYVE domain containing 21                                                 | Zfyve21             | -1.02 | 0.552 | 1.09  | 0.455 | 1.13  | 0.047 | 1.23 | 0.001 | 1.25  | 0.018 |
| 1428798_s_at | RIKEN cDNA 0610039J04 gene                                                             | 0610039J04Rik       | -1.09 | 0.108 | 1.09  | 0.185 | 1.26  | 0.279 | 1.24 | 0.001 | 1.14  | 0.228 |
| 1423440_at   | RIKEN cDNA 1110001A07 gene                                                             | 1110001A07Rik       | 1.28  | 0.020 | 1.32  | 0.226 | 1.16  | 0.313 | 1.24 | 0.004 | 1.14  | 0.516 |
| 1433582_at   | RIKEN cDNA 1190002N15 gene                                                             | 1190002N15Rik       | 1.6   | 0.203 | 2.14  | 0.039 | 1.45  | 0.015 | 1.24 | 0.030 | 1.13  | 0.156 |
| 1419265_at   | RIKEN cDNA 1200014M14 gene                                                             | 1200014M14Rik       | 1.87  | 0.361 | 2     | 0.182 | -1.09 | 0.320 | 1.24 | 0.008 | 1.01  | 0.924 |
| 1447993_a_at | RIKEN cDNA 1700026B20 gene                                                             | 1700026B20Rik       | -1.12 | 0.437 | 1.06  | 0.607 | 1.14  | 0.349 | 1.24 | 0.026 | 1.31  | 0.146 |
| 1426577_a_at | RIKEN cDNA 1810054G18 gene                                                             | 1810054G18Rik       | -1.1  | 0.367 | 1.22  | 0.083 | 1.18  | 0.238 | 1.24 | 0.042 | 1.19  | 0.067 |
| 1436105_at   | RIKEN cDNA 2310015A05 gene                                                             | 2310015A05Rik       | 1.01  | 0.594 | 1.34  | 0.120 | 1.13  | 0.645 | 1.24 | 0.008 | 1.83  | 0.067 |
| 1428350_at   | RIKEN cDNA 2310061F22 gene                                                             | 2310061F22Rik       | 1.1   | 0.135 | 1.15  | 0.074 | -1.02 | 0.510 | 1.24 | 0.008 | 1.19  | 0.211 |
| 1456355_s_at | RIKEN cDNA 2810002G02 gene /// region containing RIKEN cDNA 2810002G02Rik /// L        | 2810002G02Rik /// L | 1.02  | 0.841 | 1.21  | 0.687 | -1.11 | 0.271 | 1.24 | 0.009 | 1.17  | 0.182 |
| 1435267_at   | RIKEN cDNA A430108E01 gene                                                             | A430108E01Rik       | 1.06  | 0.297 | 1.04  | 0.842 | 1.03  | 0.986 | 1.24 | 0.011 | -1.16 | 0.137 |
| 1420717_at   | RIKEN cDNA A930018P22 gene                                                             | A930018P22Rik       | 3     | 0.300 | 1.76  | 0.700 | 1.32  | 0.606 | 1.24 | 0.009 | 2.26  | 0.450 |
| 1429850_x_at | alkB, alkylation repair homolog 4 (E. coli)                                            | Alkbh4              | -1.21 | 0.372 | 1.05  | 0.631 | 1.17  | 0.102 | 1.24 | 0.022 | 1.23  | 0.033 |
| 1448199_at   | ankyrin repeat domain 10                                                               | Ankrd10             | -1.06 | 0.126 | 1.55  | 0.005 | 1.45  | 0.019 | 1.24 | 0.040 | 1.39  | 0.049 |
| 1417655_a_at | arsenate resistance protein 2                                                          | Ars2                | -1.11 | 0.397 | 1.14  | 0.341 | 1.31  | 0.009 | 1.24 | 0.048 | 1.25  | 0.020 |
| 1433685_a_at | RIKEN cDNA C330011F01 gene /// RIKEN cDNA 6430706D22 gene                              | C330011F01Rik /// L | 2.21  | 0.393 | 2.25  | 0.362 | 1.04  | 0.601 | 1.24 | 0.017 | 1.13  | 0.015 |
| 1416873_a_at | cyclin-dependent kinase 2                                                              | Cdk2                | 1.13  | 0.194 | 1.26  | 0.002 | 1.16  | 0.221 | 1.24 | 0.041 | 1.13  | 0.214 |
| 1451505_at   | coiled-coil-helix-coiled-coil-helix domain containing 5                                | Chchd5              | 1.06  | 0.346 | 1.12  | 0.514 | -1.03 | 0.674 | 1.24 | 0.032 | 1.2   | 0.371 |
| 1452796_at   | differentially expressed in FDCP 6                                                     | Def6                | 1.45  | 0.151 | 1.87  | 0.024 | 1.22  | 0.002 | 1.24 | 0.012 | 1.4   | 0.012 |
| 1454737_at   | dual specificity phosphatase 9                                                         | Dusp9               | 1.03  | 0.928 | 1.58  | 0.049 | 1.37  | 0.022 | 1.24 | 0.014 | 1.45  | 0.045 |
| 1456756_at   | RIKEN cDNA E430016P22 gene                                                             | E430016P22Rik       | 1.08  | 0.567 | 1.21  | 0.161 | 1.05  | 0.975 | 1.24 | 0.026 | 1.21  | 0.188 |
| 1436011_at   | engulfment and cell motility 2, ced-12 homolog (C. elegans)                            | Elmo2               | -1.2  | 0.238 | 1.07  | 0.972 | 1.49  | 0.004 | 1.24 | 0.038 | 1.16  | 0.406 |
| 1434991_at   | F-box and WD-40 domain protein 17                                                      | Fbxw17              | 1.53  | 0.217 | 1.51  | 0.171 | 1.09  | 0.774 | 1.24 | 0.005 | 1.22  | 0.008 |
| 145065_x_at  | glucosamine-6-phosphate deaminase 1 /// similar to Glucosamine-6-phosphate deaminase 2 | Gnpda1 /// LOC2311  | -1.1  | 0.471 | -1.01 | 0.541 | 1.31  | 0.050 | 1.24 | 0.001 | 1.35  | 0.018 |
| 1447612_x_at | Jumonji domain containing 3                                                            | Jmjd3               | -1.21 | 0.397 | -1.03 | 0.436 | -1.03 | 0.675 | 1.24 | 0.026 | 1.23  | 0.150 |
| 1427317_at   | antigenic determinant of rec-A protein                                                 | Kin                 | -1.22 | 0.395 | -1.23 | 0.378 | -1    | 0.904 | 1.24 | 0.006 | 1.01  | 0.900 |

|              |                                                                              |                       |       |       |       |       |       |       |      |       |       |       |
|--------------|------------------------------------------------------------------------------|-----------------------|-------|-------|-------|-------|-------|-------|------|-------|-------|-------|
| 1420530_at   | neuronal d4 domain family member                                             | Neud4                 | 1.31  | 0.749 | 1.56  | 0.428 | 1.17  | 0.275 | 1.24 | 0.000 | 1.65  | 0.020 |
| 1423827_s_at | nucleolar complex associated 4 homolog (S. cerevisiae)                       | Noc4l                 | 1.34  | 0.377 | 1.46  | 0.068 | -1.09 | 0.103 | 1.24 | 0.003 | 1.15  | 0.316 |
| 1422471_at   | peroxisomal biogenesis factor 13                                             | Pex13                 | 1.07  | 0.714 | 1.47  | 0.013 | 1.17  | 0.012 | 1.24 | 0.000 | 1.21  | 0.008 |
| 1423861_at   | pleckstrin homology domain containing, family F (with FYVE domain) me        | Plekfh2               | 1.08  | 0.704 | 1.35  | 0.123 | 1.19  | 0.223 | 1.24 | 0.046 | 1.26  | 0.101 |
| 1417057_a_at | peptidylprolyl isomerase D (cyclophilin D) /// lysosomal-associated memt     | Ppid /// Lamp3 /// LC | 1.1   | 0.617 | 1.6   | 0.030 | 1.12  | 0.381 | 1.24 | 0.030 | 1.19  | 0.227 |
| 1428766_at   | RNA methyltransferase like 1                                                 | Rnmtf1                | 1.03  | 0.383 | 1.23  | 0.018 | 1.17  | 0.150 | 1.24 | 0.002 | 1.32  | 0.004 |
| 1439237_a_at | slingshot homolog 1 (Drosophila)                                             | Ssh1                  | 1.37  | 0.928 | -1.32 | 0.317 | 1.53  | 0.169 | 1.24 | 0.040 | -1.38 | 0.460 |
| 1451423_at   | tubulin-specific chaperone c                                                 | Tbcc                  | -1.83 | 0.262 | -1.14 | 0.396 | -1.19 | 0.257 | 1.24 | 0.037 | -1.05 | 0.686 |
| 1448529_at   | thrombomodulin                                                               | Thbd                  | 1.11  | 0.415 | 1.31  | 0.047 | 1.29  | 0.101 | 1.24 | 0.010 | 1.15  | 0.222 |
| 1428660_s_at | torsin family 3, member A                                                    | Tor3a                 | -1.04 | 0.634 | 1.28  | 0.003 | 1.13  | 0.294 | 1.24 | 0.013 | 1.17  | 0.419 |
| 1436045_at   | testis specific 10                                                           | Tsga10                | 1.06  | 0.816 | -1.12 | 0.065 | 1.26  | 0.428 | 1.24 | 0.045 | 1.23  | 0.448 |
| 1421832_at   | twisted gastrulation homolog 1 (Drosophila)                                  | Twsg1                 | 3.97  | 0.749 | 4.74  | 0.504 | -1.08 | 0.116 | 1.24 | 0.040 | 1.05  | 0.997 |
| 1425384_a_at | ubiquitination factor E4A, UFD2 homolog (S. cerevisiae)                      | Ube4a                 | 2.75  | 0.348 | 2.94  | 0.322 | -1.01 | 0.924 | 1.24 | 0.031 | 1.04  | 0.784 |
| 1415790_at   | ubiquitin-like domain containing CTD phosphatase 1                           | Ublcp1                | 1.03  | 0.670 | 1.21  | 0.110 | 1.07  | 0.732 | 1.24 | 0.025 | 1.06  | 0.541 |
| 1451317_at   | YTH domain family 2                                                          | Ythdf2                | 1.96  | 0.247 | 2.51  | 0.036 | 1.03  | 0.576 | 1.24 | 0.046 | 1.07  | 0.687 |
| 1439089_at   | zinc finger and BTB domain containing 41 homolog                             | Zbtb41                | 1.07  | 0.768 | 1.2   | 0.208 | 1.14  | 0.107 | 1.24 | 0.020 | 1.13  | 0.120 |
| 1452025_a_at | zinc finger protein 2                                                        | Zfp2                  | 2.47  | 0.221 | 1.92  | 0.307 | -1.62 | 0.039 | 1.24 | 0.038 | 1.5   | 0.939 |
| 1424297_at   | zinc finger protein 282                                                      | Zfp282                | -1.05 | 0.467 | 1.17  | 0.300 | -1.03 | 0.719 | 1.24 | 0.036 | 1.14  | 0.013 |
| 1416367_at   | RIKEN cDNA 1110001J03 gene                                                   | 1110001J03Rik         | 1.03  | 0.708 | 1.07  | 0.565 | 1.02  | 0.881 | 1.25 | 0.017 | 1.31  | 0.073 |
| 1452063_at   | RIKEN cDNA 2410081M15 gene                                                   | 2410081M15Rik         | 1.47  | 0.229 | 1.74  | 0.118 | 1.13  | 0.221 | 1.25 | 0.035 | 1.13  | 0.629 |
| 1428529_at   | RIKEN cDNA 2810026P18 gene                                                   | 2810026P18Rik         | -1.08 | 0.541 | 1.06  | 0.993 | 1.15  | 0.204 | 1.25 | 0.023 | 1.16  | 0.082 |
| 1428903_at   | RIKEN cDNA 3110037I16 gene                                                   | 3110037I16Rik         | -1.07 | 0.449 | 1.19  | 0.406 | 1.18  | 0.024 | 1.25 | 0.001 | 1.38  | 0.053 |
| 1427959_at   | abhydrolase domain containing 10                                             | Abhd10                | 1.04  | 0.551 | 1.38  | 0.026 | 1.27  | 0.027 | 1.25 | 0.029 | 1.29  | 0.029 |
| 1419188_s_at | chemokine (C-C motif) ligand 27                                              | Ccl27                 | -1.11 | 0.398 | 1.04  | 0.853 | 1.09  | 0.773 | 1.25 | 0.037 | 1.16  | 0.705 |
| 1416802_a_at | cell division cycle associated 5                                             | Cdca5                 | -1.1  | 0.469 | 1.21  | 0.618 | 1.15  | 0.079 | 1.25 | 0.004 | 1.24  | 0.072 |
| 1453137_at   | F-box protein 30                                                             | Fbxo30                | 1.5   | 0.294 | 1.6   | 0.203 | 1.03  | 0.047 | 1.25 | 0.019 | 1.05  | 0.510 |
| 1448620_at   | Fc receptor, IgG, low affinity III                                           | Fcgr3                 | 1.27  | 0.206 | 1.31  | 0.317 | 1.03  | 0.911 | 1.25 | 0.027 | 1.47  | 0.400 |
| 1421731_a_at | flap structure specific endonuclease 1                                       | Fen1                  | 1.18  | 0.546 | 1.56  | 0.001 | 1.28  | 0.003 | 1.25 | 0.030 | 1.27  | 0.001 |
| 1422430_at   | fidgetin-like 1                                                              | Fign1                 | 1.14  | 0.108 | 1.33  | 0.116 | 1.34  | 0.052 | 1.25 | 0.018 | 1.24  | 0.045 |
| 1425196_a_at | histidine triad nucleotide binding protein 2                                 | Hint2                 | -1.19 | 0.410 | 1.05  | 0.558 | 1.25  | 0.026 | 1.25 | 0.004 | 1.21  | 0.011 |
| 1416210_at   | IMP3, U3 small nucleolar ribonucleoprotein, homolog (yeast)                  | Imp3                  | 1.12  | 0.391 | 1.29  | 0.018 | 1.15  | 0.128 | 1.25 | 0.002 | 1.18  | 0.164 |
| 1449158_at   | potassium channel, subfamily K, member 2                                     | Kcnk2                 | 1.28  | 0.180 | 1.36  | 0.162 | 1.28  | 0.038 | 1.25 | 0.006 | 1.04  | 0.314 |
| 1452625_at   | potassium channel tetramerisation domain containing 2                        | Kctd2                 | -1.06 | 0.534 | -1.07 | 0.509 | 1.1   | 0.142 | 1.25 | 0.038 | 1.16  | 0.025 |
| 1419951_at   | Lectin, mannose-binding, 1                                                   | Lman1                 | -1.11 | 0.467 | 1.05  | 0.725 | -1.27 | 0.030 | 1.25 | 0.046 | 1.03  | 0.877 |
| 1455324_at   | hypothetical LOC433022                                                       | LOC433022             | -1.06 | 0.519 | 1.1   | 0.944 | 1.17  | 0.007 | 1.25 | 0.025 | 1.29  | 0.013 |
| 1418300_a_at | MAP kinase-interacting serine/threonine kinase 2                             | Mknk2                 | -1.05 | 0.558 | 1.27  | 0.104 | 1.19  | 0.057 | 1.25 | 0.007 | 1.47  | 0.020 |
| 1449550_at   | myosin IC                                                                    | Myo1c                 | 1.05  | 0.348 | 1.33  | 0.019 | 1.3   | 0.048 | 1.25 | 0.012 | 1.32  | 0.020 |
| 1451678_at   | nuclear prelamina A recognition factor                                       | Narf                  | 3.1   | 0.356 | 3.42  | 0.272 | 1.23  | 0.199 | 1.25 | 0.034 | 1.15  | 0.098 |
| 1418329_at   | pyroglutamyl-peptidase I                                                     | Pgpep1                | 1.34  | 0.309 | 1.71  | 0.059 | 1.26  | 0.038 | 1.25 | 0.020 | 1.29  | 0.055 |
| 1423703_at   | peter pan homolog (Drosophila)                                               | Ppan                  | -1.05 | 0.199 | 1.02  | 0.958 | -1    | 0.706 | 1.25 | 0.005 | 1.11  | 0.191 |
| 1429639_at   | preimplantation protein 4                                                    | Prei4                 | 1.66  | 0.180 | 1.31  | 0.300 | 1.15  | 0.674 | 1.25 | 0.045 | -1.11 | 0.454 |
| 1418539_a_at | protein tyrosine phosphatase, receptor type, E                               | Ptpre                 | 1.03  | 0.695 | 1.02  | 0.910 | 1.11  | 0.586 | 1.25 | 0.032 | 1.15  | 0.123 |
| 1450180_a_at | retinoic acid receptor, alpha                                                | Rara                  | 2.22  | 0.650 | 2.36  | 0.755 | -1.18 | 0.135 | 1.25 | 0.050 | 1.08  | 0.696 |
| 1439724_at   | resistance to inhibitors of cholinesterase 8 homolog B (C. elegans)          | Ric8b                 | -1.13 | 0.378 | -1.2  | 0.228 | -1.4  | 0.148 | 1.25 | 0.045 | -1.13 | 0.176 |
| 1438187_at   | solute carrier family 25 (mitochondrial carrier, palmitoylcarnitine transpor | Slc25a29              | -1.17 | 0.308 | -1.12 | 0.325 | -1.02 | 0.585 | 1.25 | 0.001 | 1.16  | 0.322 |
| 1417684_at   | THUMP domain containing 3                                                    | Thumpd3               | -1.05 | 0.546 | 1.23  | 0.574 | 1.15  | 0.092 | 1.25 | 0.003 | 1.15  | 0.057 |
| 1416507_at   | transmembrane protein 4                                                      | Tmem4                 | 1.27  | 0.913 | 1.24  | 0.833 | 1.27  | 0.589 | 1.25 | 0.012 | -1.2  | 0.400 |
| 1455692_x_at | RIKEN cDNA 1700097N02 gene                                                   | 1700097N02Rik         | -1.01 | 0.826 | -1.17 | 0.438 | 1.05  | 0.929 | 1.26 | 0.026 | -1.07 | 0.691 |
| 1455850_at   | RIKEN cDNA 2310003H01 gene                                                   | 2310003H01Rik         | 1.16  | 0.444 | 1.61  | 0.075 | 1.08  | 0.869 | 1.26 | 0.016 | 1.39  | 0.031 |
| 1453006_at   | RIKEN cDNA 2610306H15 gene                                                   | 2610306H15Rik         | 1.09  | 0.348 | 1.57  | 0.040 | 1.44  | 0.036 | 1.26 | 0.000 | 1.57  | 0.006 |
| 1418040_at   | RIKEN cDNA 4432406C05 gene                                                   | 4432406C05Rik         | -1.03 | 0.513 | 1.11  | 0.901 | 1.25  | 0.194 | 1.26 | 0.031 | 1.22  | 0.240 |
| 1460624_at   | RIKEN cDNA 6330564D18 gene                                                   | 6330564D18Rik         | -1.16 | 0.139 | 1.02  | 0.802 | 1.16  | 0.522 | 1.26 | 0.013 | 1.1   | 0.440 |
| 1438407_at   | RIKEN cDNA 9330132E09 gene                                                   | 9330132E09Rik         | 1.1   | 0.041 | 1.17  | 0.158 | 1.08  | 0.134 | 1.26 | 0.034 | 1.11  | 0.259 |
| 1426459_s_at | expressed sequence AW549877                                                  | AW549877              | 1.38  | 0.371 | 1.64  | 0.196 | 1.18  | 0.039 | 1.26 | 0.011 | 1.07  | 0.464 |
| 1444657_at   | Bcl3 binding protein                                                         | B3bp                  | 1.12  | 0.432 | 1.65  | 0.313 | 1.02  | 0.757 | 1.26 | 0.023 | -1.07 | 0.282 |
| 1444016_at   | RIKEN cDNA C430014K04 gene                                                   | C430014K04Rik         | 1.11  | 0.864 | 1.22  | 0.310 | 1.81  | 0.456 | 1.26 | 0.020 | 3.24  | 0.299 |
| 1423098_at   | calpain 7                                                                    | Capn7                 | 1.46  | 0.230 | 1.46  | 0.321 | 1.07  | 0.724 | 1.26 | 0.005 | 1.11  | 0.049 |
| 1418542_s_at | centromere protein O                                                         | Cenpo                 | 1.56  | 0.188 | 1.47  | 0.002 | 1.05  | 0.756 | 1.26 | 0.026 | 1.14  | 0.779 |

|              |                                                                          |                    |       |       |       |       |       |       |      |       |       |       |
|--------------|--------------------------------------------------------------------------|--------------------|-------|-------|-------|-------|-------|-------|------|-------|-------|-------|
| 1436034_at   | centrosomal protein 68                                                   | Cep68              | -1.06 | 0.565 | 1.01  | 0.995 | 1.14  | 0.451 | 1.26 | 0.024 | 1.42  | 0.003 |
| 1432273_a_at | Duffy blood group, chemokine receptor                                    | Darc               | 1.12  | 0.476 | 1.05  | 0.801 | 1.34  | 0.092 | 1.26 | 0.006 | 1.06  | 0.800 |
| 1434607_at   | DEAD (Asp-Glu-Ala-Asp) box polypeptide 52                                | Ddx52              | -1.02 | 0.626 | 1.27  | 0.145 | 1.15  | 0.066 | 1.26 | 0.006 | 1.22  | 0.030 |
| 1423799_at   | eukaryotic translation initiation factor 1                               | Eif1               | 1.05  | 0.453 | 1.12  | 0.093 | 1.14  | 0.027 | 1.26 | 0.002 | 1.05  | 0.132 |
| 1436022_at   | endonuclease G-like 1                                                    | Endog1             | 1.29  | 0.460 | 1.7   | 0.070 | 1.08  | 0.146 | 1.26 | 0.018 | 1.16  | 0.015 |
| 1450935_at   | excision repair cross-complementing rodent repair deficiency, compleme   | Ercc5              | -1.01 | 0.580 | 1.91  | 0.140 | 1.32  | 0.025 | 1.26 | 0.042 | 1.3   | 0.071 |
| 1435544_at   | exosome component 6                                                      | Exosc6             | -1.08 | 0.516 | 1.22  | 0.509 | 1.11  | 0.147 | 1.26 | 0.008 | 1.31  | 0.012 |
| 1434271_at   | glucosidase beta 2                                                       | Gba2               | 1.65  | 0.320 | 1.82  | 0.070 | 1.17  | 0.056 | 1.26 | 0.017 | 1.4   | 0.286 |
| 1423071_x_at | hypothetical gene supported by BC019681; BC027236 /// hypothetical LOC   | LOC270335 /// LOC- | -1.06 | 0.518 | 1.02  | 0.874 | 1.28  | 0.001 | 1.26 | 0.008 | 1.2   | 0.023 |
| 1437061_at   | methyl-CpG binding domain protein 1                                      | Mbd1               | 1.14  | 0.529 | 1.38  | 0.054 | 1.14  | 0.222 | 1.26 | 0.035 | 1.16  | 0.265 |
| 1418150_at   | myotubularin related protein 4                                           | Mtmr4              | 3.93  | 0.772 | 4.49  | 0.360 | 1.11  | 0.071 | 1.26 | 0.013 | 1.23  | 0.047 |
| 1450401_at   | nuclear receptor coactivator 6 interacting protein                       | Ncoa6ip            | 1.02  | 0.874 | 1.42  | 0.120 | -1.03 | 0.633 | 1.26 | 0.003 | 1.23  | 0.056 |
| 1421321_a_at | neuroepithelial cell transforming gene 1                                 | Net1               | 1.8   | 0.415 | 2.62  | 0.108 | 1.1   | 0.423 | 1.26 | 0.024 | 1.53  | 0.015 |
| 1416709_a_at | neugrin, neurite outgrowth associated                                    | Ngm                | -1.15 | 0.179 | -1.03 | 0.654 | 1.03  | 0.786 | 1.26 | 0.015 | -1.03 | 0.502 |
| 1421965_s_at | Notch gene homolog 3 (Drosophila)                                        | Notch3             | -1.24 | 0.226 | 1.12  | 0.467 | 1.11  | 0.605 | 1.26 | 0.037 | 1.4   | 0.230 |
| 1447253_x_at | nucleoporin 54                                                           | Nup54              | 1.73  | 0.922 | 4.44  | 0.048 | 1.24  | 0.671 | 1.26 | 0.007 | -1.14 | 0.709 |
| 1423534_at   | programmed cell death 2                                                  | Pdcd2              | -1.06 | 0.325 | 1.2   | 0.252 | 1.15  | 0.265 | 1.26 | 0.005 | 1.29  | 0.002 |
| 1431893_a_at | prenyl (solanesyl) diphosphate synthase, subunit 1                       | Pdss1              | 1.51  | 0.190 | 1.52  | 0.125 | 1.16  | 0.155 | 1.26 | 0.002 | -1.07 | 0.183 |
| 1423044_at   | proline synthetase co-transcribed                                        | Prosc              | 1.36  | 0.306 | 1.71  | 0.013 | 1.12  | 0.034 | 1.26 | 0.020 | 1.19  | 0.005 |
| 1417166_at   | PC4 and SFRS1 interacting protein 1                                      | Psip1              | 1.04  | 0.933 | 1.06  | 0.731 | 1.23  | 0.014 | 1.26 | 0.035 | 1.27  | 0.027 |
| 1431068_at   | required for meiotic nuclear division 5 homolog A (S. cerevisiae)        | Rmnd5a             | 1.13  | 0.422 | 1.24  | 0.768 | 1.48  | 0.459 | 1.26 | 0.046 | 1.2   | 0.723 |
| 1450778_a_at | RNA U, small nuclear RNA export adaptor                                  | Rnuxa              | 1.1   | 0.042 | 1.48  | 0.014 | 1.18  | 0.027 | 1.26 | 0.014 | 1.15  | 0.086 |
| 1455292_x_at | Regulator of sex limited protein-Slp 1                                   | Rsl1               | 3.18  | 0.321 | 2.86  | 0.112 | 1.27  | 0.226 | 1.26 | 0.048 | 1.27  | 0.328 |
| 1417719_at   | sin3 associated polypeptide                                              | Sap30              | -1    | 0.875 | 1.29  | 0.182 | 1.14  | 0.206 | 1.26 | 0.012 | 1.37  | 0.006 |
| 1417406_at   | SERTA domain containing 1                                                | Sertad1            | -1.06 | 0.513 | 1.14  | 0.969 | 1.3   | 0.007 | 1.26 | 0.006 | 1.34  | 0.021 |
| 1433789_at   | small nucleolar RNA host gene (non-protein coding) 3 /// similar to RNA, | Snhg3 /// LOC67045 | -1.16 | 0.347 | 1.04  | 0.797 | 1.22  | 0.079 | 1.26 | 0.029 | 1.12  | 0.170 |
| 1451339_at   | sulfite oxidase                                                          | Suox               | 5.26  | 0.543 | 8.31  | 0.070 | 1.38  | 0.039 | 1.26 | 0.024 | 1.42  | 0.004 |
| 1422517_a_at | zinc ribbon domain containing, 1                                         | Znrd1              | -1.01 | 0.749 | 1.21  | 0.144 | 1.25  | 0.034 | 1.26 | 0.005 | 1.31  | 0.051 |
| 1460474_at   | RIKEN cDNA 2610028L16 gene                                               | 2610028L16Rik      | -1.05 | 0.559 | 1.06  | 0.709 | 1.11  | 0.696 | 1.27 | 0.018 | -1.16 | 0.349 |
| 1453745_at   | RIKEN cDNA 2700038G22 gene                                               | 2700038G22Rik      | 1.04  | 0.299 | 1.04  | 0.672 | 1.16  | 0.054 | 1.27 | 0.025 | 1.13  | 0.447 |
| 1422628_at   | RIKEN cDNA 4632417K18 gene                                               | 4632417K18Rik      | 1.29  | 0.065 | 1.66  | 0.013 | 1.21  | 0.004 | 1.27 | 0.002 | 1.23  | 0.018 |
| 1429364_at   | RIKEN cDNA 4930579G24 gene                                               | 4930579G24Rik      | 1.01  | 0.767 | 1.21  | 0.021 | 1.4   | 0.037 | 1.27 | 0.036 | 1.27  | 0.003 |
| 1432178_at   | RIKEN cDNA 4933431119 gene                                               | 4933431119Rik      | 1.39  | 0.755 | 2.15  | 0.737 | -1.75 | 0.231 | 1.27 | 0.032 | 1.35  | 0.975 |
| 1445558_at   | RIKEN cDNA 5930430L01 gene                                               | 5930430L01Rik      | -1.03 | 0.502 | 1.05  | 0.797 | -1    | 0.889 | 1.27 | 0.028 | -1.81 | 0.007 |
| 1451326_at   | abhydrolase domain containing 14b                                        | Abhd14b            | -1.03 | 0.528 | -1.07 | 0.523 | 1.17  | 0.304 | 1.27 | 0.007 | 1.24  | 0.339 |
| 1457265_at   | RIKEN cDNA B230333C21 gene                                               | B230333C21Rik      | -1.02 | 0.599 | 1.05  | 0.854 | 1.1   | 0.316 | 1.27 | 0.021 | -1.01 | 0.560 |
| 1425776_a_at | expressed sequence C87436                                                | C87436             | 2.82  | 0.199 | 1.93  | 0.531 | 1.23  | 0.237 | 1.27 | 0.008 | 1.3   | 0.074 |
| 1422123_s_at | CEA-related cell adhesion molecule 1 /// CEA-related cell adhesion mole  | Ceacam1 /// Ceacar | 1.01  | 0.995 | -1.27 | 0.290 | 1.4   | 0.434 | 1.27 | 0.000 | 1.31  | 0.151 |
| 1447860_x_at | component of oligomeric golgi complex 8                                  | Cog8               | -1.17 | 0.421 | 1.2   | 0.653 | -1.1  | 0.354 | 1.27 | 0.003 | 1.2   | 0.326 |
| 1416019_at   | down-regulator of transcription 1                                        | Dr1                | 1.01  | 0.987 | 1.27  | 0.015 | 1.24  | 0.259 | 1.27 | 0.012 | 1.12  | 0.393 |
| 1435926_at   | RIKEN cDNA E030003F13 gene                                               | E030003F13Rik      | -1.03 | 0.574 | 1.4   | 0.017 | 1.23  | 0.022 | 1.27 | 0.028 | 1.29  | 0.047 |
| 1440299_at   | RIKEN cDNA E330016A19 gene                                               | E330016A19Rik      | -1.07 | 0.495 | 1.14  | 0.779 | 1.09  | 0.996 | 1.27 | 0.027 | 1.18  | 0.079 |
| 1418275_a_at | E74-like factor 2                                                        | Eif2               | 1.09  | 0.537 | 1.12  | 0.212 | -1.05 | 0.632 | 1.27 | 0.003 | 1.04  | 0.656 |
| 1424854_at   | histone 1, H4i                                                           | Hist1h4i           | -1.25 | 0.225 | 1.04  | 0.781 | 1.04  | 0.791 | 1.27 | 0.047 | 1.19  | 0.069 |
| 1451021_a_at | Kruppel-like factor 5                                                    | Klf5               | 1.84  | 0.399 | 2.3   | 0.093 | 1.21  | 0.120 | 1.27 | 0.033 | 1.46  | 0.001 |
| 1417115_at   | mitogen activated protein kinase kinase kinase 12                        | Map3k12            | 1.03  | 0.764 | 1.2   | 0.856 | 1.15  | 0.393 | 1.27 | 0.024 | 1.61  | 0.047 |
| 1433816_at   | mitochondrial carrier triple repeat 1                                    | Mcart1             | 1.15  | 0.367 | 1.23  | 0.108 | 1.06  | 0.773 | 1.27 | 0.025 | 1.08  | 0.109 |
| 1423196_at   | neural precursor cell expressed, developmentally down-regulated gene 1   | Nedd1              | 1.44  | 0.356 | 1.45  | 0.127 | 1.15  | 0.109 | 1.27 | 0.010 | 1.09  | 0.149 |
| 1428339_at   | nudix (nucleoside diphosphate linked moiety X)-type motif 21             | Nudt21             | 1.3   | 0.259 | 1.38  | 0.091 | 1.35  | 0.003 | 1.27 | 0.003 | 1.3   | 0.007 |
| 1429651_at   | phosphatase and actin regulator 3                                        | Phactr3            | 1.36  | 0.980 | 1.54  | 0.862 | -1.04 | 0.420 | 1.27 | 0.014 | 1.31  | 0.748 |
| 1430286_s_at | protein phosphatase 1, regulatory (inhibitor) subunit 14c                | Ppp1r14c           | 1.16  | 0.903 | 1.43  | 0.647 | 1.11  | 0.838 | 1.27 | 0.025 | 1.27  | 0.735 |
| 1442911_at   | RIO kinase 2 (yeast)                                                     | Rio2               | -1.19 | 0.215 | -1.28 | 0.334 | 1.28  | 0.717 | 1.27 | 0.028 | -1.03 | 0.428 |
| 1420502_at   | spermidine/spermine N1-acetyl transferase 1                              | Sat1               | 1.29  | 0.135 | 1.7   | 0.006 | 1.38  | 0.014 | 1.27 | 0.011 | 1.32  | 0.006 |
| 1451596_a_at | sphingosine kinase 1                                                     | Sphk1              | 1.07  | 0.348 | 1.33  | 0.015 | 1.19  | 0.192 | 1.27 | 0.000 | 1.07  | 0.022 |
| 1453351_at   | T-box 20                                                                 | Tbx20              | 2     | 0.425 | 1.18  | 0.658 | 1.56  | 0.288 | 1.27 | 0.016 | 1.75  | 0.860 |
| 1424929_a_at | tripartite motif protein 26                                              | Trim26             | 1.12  | 0.472 | 1.5   | 0.027 | 1.2   | 0.079 | 1.27 | 0.005 | 1.12  | 0.134 |
| 1455873_a_at | vacuolar protein sorting 18 (yeast)                                      | Vps18              | 1.44  | 0.567 | 1.87  | 0.069 | 1.04  | 0.757 | 1.27 | 0.017 | 1     | 0.897 |
| 1436548_at   | RIKEN cDNA 1810012P15 gene                                               | 1810012P15Rik      | -1.18 | 0.335 | -1.06 | 0.637 | 1.27  | 0.288 | 1.28 | 0.029 | 1.3   | 0.413 |



|              |                                                                                    |               |       |       |       |       |       |       |      |       |       |       |
|--------------|------------------------------------------------------------------------------------|---------------|-------|-------|-------|-------|-------|-------|------|-------|-------|-------|
| 1433112_at   | RIKEN cDNA 4933424L07 gene                                                         | 4933424L07Rik | -1.08 | 0.463 | 1.18  | 0.675 | 1.08  | 0.423 | 1.28 | 0.010 | 1.05  | 0.732 |
| 1432509_at   | RIKEN cDNA 5033430I15 gene                                                         | 5033430I15Rik | 1.23  | 0.217 | 1.32  | 0.211 | 1.21  | 0.137 | 1.28 | 0.040 | 1.39  | 0.025 |
| 1430701_a_at | RIKEN cDNA 5730528L13 gene                                                         | 5730528L13Rik | 3.17  | 0.244 | 3.24  | 0.084 | 1.18  | 0.105 | 1.28 | 0.013 | 1.25  | 0.030 |
| 1426292_at   | RIKEN cDNA 6330581L23 gene                                                         | 6330581L23Rik | -1.09 | 0.377 | 1.08  | 0.705 | 1.03  | 0.902 | 1.28 | 0.037 | 1.07  | 0.474 |
| 1454682_at   | RIKEN cDNA A430005L14 gene                                                         | A430005L14Rik | -1.06 | 0.546 | 1.19  | 0.876 | 1.2   | 0.077 | 1.28 | 0.007 | 1.21  | 0.033 |
| 1418854_at   | baculoviral IAP repeat-containing 2                                                | Birc2         | -1.24 | 0.342 | -1.09 | 0.495 | 1.16  | 0.316 | 1.28 | 0.031 | 1.14  | 0.173 |
| 1417955_at   | coiled-coil domain containing 71                                                   | Ccdc71        | 1     | 0.845 | 1.13  | 0.487 | 1.12  | 0.118 | 1.28 | 0.029 | 1.19  | 0.102 |
| 1435320_at   | CTD (carboxy-terminal domain, RNA polymerase II, polypeptide A) small              | Ctdsp2        | 1.22  | 0.087 | 1.4   | 0.029 | 1.09  | 0.344 | 1.28 | 0.014 | 1.04  | 0.889 |
| 1435866_s_at | histone 3, H2a                                                                     | Hist3h2a      | -1.05 | 0.609 | 1.21  | 0.041 | 1.21  | 0.013 | 1.28 | 0.008 | 1.25  | 0.005 |
| 1455305_x_at | heterogeneous nuclear ribonucleoprotein A1                                         | Hnrpa1        | 1.14  | 0.786 | 1.2   | 0.801 | -1.02 | 0.739 | 1.28 | 0.004 | -1.03 | 0.174 |
| 1418045_at   | inositol polyphosphate-1-phosphatase                                               | Inpp1         | 1.43  | 0.559 | 1.71  | 0.102 | 1.15  | 0.242 | 1.28 | 0.005 | 1.23  | 0.307 |
| 1456200_at   | inositol polyphosphate multikinase                                                 | Ipmk          | -1.06 | 0.495 | 1.1   | 0.830 | 1.33  | 0.039 | 1.28 | 0.008 | 1.1   | 0.255 |
| 1447864_s_at | pogo transposable element with KRAB domain                                         | Pogk          | -1.16 | 0.422 | 1.24  | 0.845 | 1.11  | 0.010 | 1.28 | 0.010 | 1.26  | 0.016 |
| 1450862_at   | RAD54 like (S. cerevisiae)                                                         | Rad54l        | 1.49  | 0.138 | 1.51  | 0.036 | 1.04  | 0.678 | 1.28 | 0.002 | -1.09 | 0.270 |
| 1433683_at   | RNA binding motif protein 35b                                                      | Rbm35b        | 1.23  | 0.670 | 1.31  | 0.259 | -1    | 0.943 | 1.28 | 0.033 | 2.94  | 0.121 |
| 1424333_at   | RNA (guanine-9-) methyltransferase domain containing 1                             | Rg9mtd1       | 1.08  | 0.136 | 1.38  | 0.148 | 1.16  | 0.068 | 1.28 | 0.031 | 1.17  | 0.060 |
| 1437052_s_at | solute carrier family 2 (facilitated glucose transporter), member 3                | Slc2a3        | -1.03 | 0.686 | -1    | 0.594 | 1.26  | 0.090 | 1.28 | 0.016 | 1.29  | 0.020 |
| 1452789_at   | stannin                                                                            | Snn           | 1.05  | 0.805 | 1.5   | 0.010 | 1.2   | 0.229 | 1.28 | 0.002 | 1.42  | 0.012 |
| 1448040_at   | TCF3 (E2A) fusion partner                                                          | Tfpt          | -1.8  | 0.075 | -1.43 | 0.235 | 1.03  | 0.935 | 1.28 | 0.027 | -1.03 | 0.639 |
| 1426527_at   | target of EGR1, member 1 (nuclear)                                                 | Toe1          | -1.05 | 0.345 | 1.3   | 0.467 | 1.04  | 0.736 | 1.28 | 0.005 | 1.1   | 0.056 |
| 1438669_at   | WD repeat domain 40A                                                               | Wdr40a        | 1.02  | 0.775 | 1.35  | 0.004 | 1.1   | 0.537 | 1.28 | 0.010 | 1.03  | 0.917 |
| 1429560_at   | zinc finger protein 422, related sequence 1                                        | Zfp422-rs1    | 1.19  | 0.477 | 1.55  | 0.194 | 1.11  | 0.479 | 1.28 | 0.017 | 1.07  | 0.768 |
| 1455633_at   | zinc finger protein 647                                                            | Zfp647        | -1.08 | 0.542 | 1.08  | 0.927 | 1.15  | 0.038 | 1.28 | 0.017 | 1.43  | 0.049 |
| 1431252_a_at | zinc finger protein 655                                                            | Zfp655        | 1.21  | 0.383 | 1.43  | 0.044 | 1.06  | 0.799 | 1.28 | 0.015 | 1.23  | 0.120 |
| 1428836_at   | RIKEN cDNA 2300009A05 gene                                                         | 2300009A05Rik | 1     | 0.984 | 1.16  | 0.046 | 1.22  | 0.016 | 1.29 | 0.014 | 1.37  | 0.002 |
| 1432013_a_at | RIKEN cDNA 2610016C23 gene                                                         | 2610016C23Rik | 1.34  | 0.050 | 1.75  | 0.165 | 1.51  | 0.023 | 1.29 | 0.043 | 1.18  | 0.241 |
| 1430905_at   | RIKEN cDNA 4921504E06 gene                                                         | 4921504E06Rik | -1.04 | 0.634 | 1.14  | 0.093 | 1.12  | 0.883 | 1.29 | 0.035 | 1.15  | 0.951 |
| 1424003_at   | RIKEN cDNA 4930444A02 gene                                                         | 4930444A02Rik | 1.05  | 0.313 | 1.42  | 0.076 | 1.26  | 0.014 | 1.29 | 0.001 | 1.21  | 0.175 |
| 1431523_at   | RIKEN cDNA 4930564K09 gene                                                         | 4930564K09Rik | 1.41  | 0.454 | 2.35  | 0.980 | 1.07  | 0.877 | 1.29 | 0.006 | -1.54 | 0.113 |
| 1451571_s_at | RIKEN cDNA 9130019O22 gene /// RIKEN cDNA E430018J23 gene /// F9130019O22Rik /// E |               | -1.03 | 0.672 | 1.13  | 0.750 | 1.08  | 0.543 | 1.29 | 0.006 | 1.12  | 0.433 |
| 1416835_s_at | S-adenosylmethionine decarboxylase 1 /// S-adenosylmethionine decarb               | Amd1 /// Amd2 | 1.51  | 0.214 | 1.8   | 0.076 | 1.15  | 0.082 | 1.29 | 0.019 | 1.23  | 0.151 |
| 1435033_at   | Rho guanine nucleotide exchange factor (GEF) 4                                     | Arhgef4       | 1.46  | 0.144 | 2.28  | 0.026 | -1.13 | 0.407 | 1.29 | 0.008 | 1.31  | 0.421 |
| 1451340_at   | AT rich interactive domain 5A (Mrf1 like)                                          | Arid5a        | -1.12 | 0.302 | -1.07 | 0.695 | -1.23 | 0.231 | 1.29 | 0.004 | -1.06 | 0.634 |
| 1436422_at   | cDNA sequence BC026590                                                             | BC026590      | 1.33  | 0.507 | 1.82  | 0.058 | 1.35  | 0.019 | 1.29 | 0.003 | 1.48  | 0.005 |
| 1440906_at   | B-cell CLL/lymphoma 7C                                                             | Bcl7c         | -1.29 | 0.173 | 1.16  | 0.337 | 1.29  | 0.641 | 1.29 | 0.040 | 1.6   | 0.119 |
| 1453740_a_at | cyclin L2                                                                          | Ccnl2         | 1.66  | 0.355 | 1.61  | 0.566 | 1.01  | 0.952 | 1.29 | 0.035 | -1.09 | 0.388 |
| 1459053_at   | centaurin, gamma 2                                                                 | Centg2        | -1.31 | 0.218 | -1.19 | 0.336 | -1.03 | 0.921 | 1.29 | 0.011 | 1.12  | 0.549 |
| 1457233_at   | DnaJ (Hsp40) homolog, subfamily A, member 2                                        | Dnaj2         | -1.02 | 0.581 | -1.03 | 0.585 | 1.41  | 0.063 | 1.29 | 0.013 | 1.01  | 0.928 |
| 1459546_s_at | ectonucleotide pyrophosphatase/phosphodiesterase 1                                 | Enpp1         | -1.04 | 0.393 | -1.07 | 0.493 | -1.11 | 0.371 | 1.29 | 0.025 | -1.09 | 0.221 |
| 1429493_at   | methyltransferase like 4                                                           | Mettl4        | 1.12  | 0.212 | 1.11  | 0.109 | 1.05  | 0.346 | 1.29 | 0.038 | -1.02 | 0.650 |
| 1424908_at   | mitochondrial methionyl-tRNA formyltransferase                                     | Mtfmt         | 1.15  | 0.059 | 1.33  | 0.033 | 1.17  | 0.061 | 1.29 | 0.004 | 1.19  | 0.010 |
| 1419753_at   | nuclear transcription factor, X-box binding 1                                      | Nfx1          | 1.14  | 0.468 | 1.33  | 0.034 | 1.22  | 0.245 | 1.29 | 0.007 | 1.21  | 0.101 |
| 1418082_at   | N-myristoyltransferase 1                                                           | Nmt1          | -1.05 | 0.578 | 1.36  | 0.554 | -1.14 | 0.299 | 1.29 | 0.043 | 1.02  | 0.847 |
| 1420535_a_at | negative regulator of ubiquitin-like proteins 1                                    | Nub1          | 1.45  | 0.471 | 1.57  | 0.063 | 1.12  | 0.449 | 1.29 | 0.024 | 1.27  | 0.096 |
| 1454120_a_at | polycarb group ring finger 6                                                       | Pcrgf6        | 2.78  | 0.693 | 2.89  | 0.119 | 1.58  | 0.166 | 1.29 | 0.019 | 1.41  | 0.094 |
| 1416388_at   | phosphatidylinositol-4-phosphate 5-kinase, type II, gamma                          | Pip5k2c       | 1.92  | 0.733 | 2.47  | 0.249 | 1.38  | 0.207 | 1.29 | 0.012 | 1.16  | 0.799 |
| 1435253_at   | RAB11B, member RAS oncogene family                                                 | Rab11b        | -1.11 | 0.429 | 1.02  | 0.605 | 1.11  | 0.196 | 1.29 | 0.029 | 1.13  | 0.297 |
| 1430367_at   | Stam binding protein like 1                                                        | Stambpl1      | -1.2  | 0.231 | -1.14 | 0.424 | -1.03 | 0.602 | 1.29 | 0.018 | -1.01 | 0.624 |
| 1434022_at   | zinc finger and BTB domain containing 33                                           | Zbtb33        | -1.01 | 0.735 | 1.16  | 0.437 | 1.26  | 0.003 | 1.29 | 0.009 | 1.25  | 0.013 |
| 1426896_at   | zinc finger protein 191                                                            | Zfp191        | 1.43  | 0.477 | 1.35  | 0.661 | 1.05  | 0.615 | 1.29 | 0.008 | 1.25  | 0.290 |
| 1455778_at   | zinc finger protein 192                                                            | Zfp192        | 1.1   | 0.364 | 1.07  | 0.634 | 1.22  | 0.225 | 1.29 | 0.039 | 1.05  | 0.696 |
| 1424261_at   | zinc finger protein 672                                                            | Zfp672        | 1.64  | 0.729 | 1.81  | 0.117 | 1.17  | 0.052 | 1.29 | 0.004 | 1.41  | 0.026 |
| 1432114_at   | RIKEN cDNA 1110035E04 gene                                                         | 1110035E04Rik | -1.17 | 0.340 | -1.23 | 0.159 | 1.4   | 0.814 | 1.3  | 0.001 | 1.27  | 0.454 |
| 1429536_at   | RIKEN cDNA 2310040C09 gene                                                         | 2310040C09Rik | -1.17 | 0.310 | -1.29 | 0.290 | -1.16 | 0.482 | 1.3  | 0.010 | 1.28  | 0.451 |
| 1429126_at   | RIKEN cDNA 2600001M11 gene                                                         | 2600001M11Rik | 1.27  | 0.249 | 1.33  | 0.121 | -1.11 | 0.232 | 1.3  | 0.033 | 1.2   | 0.134 |
| 1424692_at   | RIKEN cDNA 2810055F11 gene                                                         | 2810055F11Rik | 1.53  | 0.251 | 1.83  | 0.018 | 1.25  | 0.007 | 1.3  | 0.039 | 1.47  | 0.008 |
| 1427085_at   | RIKEN cDNA 2810432D09 gene                                                         | 2810432D09Rik | 1.03  | 0.905 | 1.5   | 0.162 | 1.3   | 0.046 | 1.3  | 0.003 | 1.25  | 0.090 |
| 1455852_at   | RIKEN cDNA 4833432M17 gene                                                         | 4833432M17Rik | 1.92  | 0.197 | 2.44  | 0.010 | 1.12  | 0.593 | 1.3  | 0.030 | 1.04  | 0.997 |

|              |                                                                              |                    |       |       |       |       |       |       |      |       |       |       |
|--------------|------------------------------------------------------------------------------|--------------------|-------|-------|-------|-------|-------|-------|------|-------|-------|-------|
| 1454028_at   | RIKEN cDNA 4931402H11 gene                                                   | 4931402H11Rik      | 1.47  | 0.227 | -1.46 | 0.141 | 1.01  | 0.867 | 1.3  | 0.003 | 1.01  | 0.683 |
| 1416912_at   | RIKEN cDNA 6330407G11 gene                                                   | 6330407G11Rik      | 1.32  | 0.316 | 1.4   | 0.369 | 1.07  | 0.099 | 1.3  | 0.007 | 1     | 0.992 |
| 1455334_at   | RIKEN cDNA 9830167H18 gene                                                   | 9830167H18Rik      | 1.33  | 0.301 | 1.86  | 0.016 | 1.15  | 0.259 | 1.3  | 0.019 | 1.02  | 0.716 |
| 1452273_at   | expressed sequence AA409316                                                  | AA409316           | 1.23  | 0.209 | 1.58  | 0.035 | 1.42  | 0.014 | 1.3  | 0.012 | 1.55  | 0.033 |
| 1451347_at   | coiled-coil domain containing 95                                             | Ccdc95             | 2.65  | 0.408 | 3.34  | 0.053 | 1.36  | 0.078 | 1.3  | 0.004 | 1.3   | 0.085 |
| 1416511_a_at | CDC42 effector protein (Rho GTPase binding) 4                                | Cdc42ep4           | 1.12  | 0.476 | 1.27  | 0.158 | 1.22  | 0.271 | 1.3  | 0.008 | 1.23  | 0.178 |
| 1446915_at   | DNA segment, Chr 7, ERATO Doi 316, expressed                                 | D7Erttd316e        | -1.34 | 0.253 | 1.97  | 0.421 | -1.33 | 0.373 | 1.3  | 0.047 | 1.86  | 0.031 |
| 1452097_a_at | dual specificity phosphatase 7 /// similar to dual specificity phosphatase 7 | Dusp7 /// LOC67494 | 1.5   | 0.314 | 2.06  | 0.091 | 1.19  | 0.144 | 1.3  | 0.017 | 1.23  | 0.031 |
| 1416268_at   | E26 avian leukemia oncogene 2, 3' domain                                     | Ets2               | 1.03  | 0.898 | 1.32  | 0.027 | 1.26  | 0.064 | 1.3  | 0.047 | 1.2   | 0.020 |
| 1424300_at   | gem (nuclear organelle) associated protein 6                                 | Gemin6             | 1.19  | 0.010 | 1.32  | 0.005 | 1.2   | 0.030 | 1.3  | 0.003 | 1.16  | 0.027 |
| 1431333_at   | histone 1, H4h                                                               | Hist1h4h           | -1.72 | 0.138 | 1.18  | 0.583 | 1.82  | 0.634 | 1.3  | 0.039 | 1.79  | 0.213 |
| 1439637_at   | kinesin family member 7                                                      | Kif7               | 3.47  | 0.739 | 3.19  | 0.204 | 1.06  | 0.319 | 1.3  | 0.012 | 1.13  | 0.580 |
| 1425280_at   | leukocyte receptor cluster (LRC) member 1                                    | Leng1              | -1.05 | 0.494 | 1.12  | 0.670 | 1.05  | 0.537 | 1.3  | 0.043 | 1.16  | 0.133 |
| 1455700_at   | MTERF domain containing 3                                                    | Mterfd3            | 1.15  | 0.061 | 1.23  | 0.199 | 1.24  | 0.111 | 1.3  | 0.045 | 1.25  | 0.168 |
| 1417971_at   | nurim (nuclear envelope membrane protein)                                    | Nrm                | 2.01  | 0.612 | 1.79  | 0.285 | 1.16  | 0.414 | 1.3  | 0.037 | 1.05  | 0.817 |
| 1455387_at   | nuclear fragile X mental retardation protein interacting protein 2           | Nufip2             | 1.1   | 0.136 | 1.23  | 0.279 | 1.03  | 0.006 | 1.3  | 0.021 | 1.2   | 0.711 |
| 1422890_at   | protocadherin 18                                                             | Pcdh18             | -1.07 | 0.833 | 1.41  | 0.138 | 1.79  | 0.039 | 1.3  | 0.036 | 1.3   | 0.124 |
| 1428345_at   | phosphatidic acid phosphatase type 2 domain containing 2                     | Ppapdc2            | 1.06  | 0.865 | 1.29  | 0.206 | 1.81  | 0.092 | 1.3  | 0.013 | 1.04  | 0.686 |
| 1423387_at   | proteasome (prosome, macropain) 26S subunit, non-ATPase, 9                   | Psmcd9             | 1.3   | 0.716 | 1.69  | 0.832 | 1.08  | 0.879 | 1.3  | 0.004 | 1.68  | 0.234 |
| 1452736_at   | R3H domain and coiled-coil containing 1                                      | R3hcc1             | 1.95  | 0.295 | 2.37  | 0.052 | 1.21  | 0.054 | 1.3  | 0.003 | 1.26  | 0.029 |
| 1438397_a_at | RNA binding motif protein 39                                                 | Rbm39              | 4.39  | 0.296 | 4.04  | 0.101 | -1.06 | 0.615 | 1.3  | 0.023 | -1.04 | 0.453 |
| 1454011_a_at | replication protein A2                                                       | Rpa2               | 4.17  | 0.273 | 4.99  | 0.007 | 1.09  | 0.455 | 1.3  | 0.013 | 1.13  | 0.222 |
| 1451190_a_at | SH3-binding kinase 1                                                         | Sbk1               | -1.29 | 0.317 | 1.43  | 0.673 | 1.82  | 0.072 | 1.3  | 0.005 | 1.61  | 0.024 |
| 1443158_at   | Sex comb on midleg homolog 1                                                 | Scmh1              | 1.76  | 0.189 | 1.75  | 0.046 | 1.32  | 0.220 | 1.3  | 0.035 | -1.01 | 0.908 |
| 1435887_at   | serine (or cysteine) peptidase inhibitor, clade A (alpha-1 antipeptinase, i  | Serpina11          | -1.19 | 0.354 | -1.23 | 0.342 | 1.44  | 0.292 | 1.3  | 0.026 | 1.25  | 0.453 |
| 1439041_at   | solute carrier family 39 (zinc transporter), member 10                       | Slc39a10           | 5.22  | 0.379 | 4.58  | 0.292 | 1.12  | 0.026 | 1.3  | 0.003 | -1.05 | 0.658 |
| 1421012_at   | signal recognition particle receptor, B subunit                              | Srpb               | -1.18 | 0.393 | 1.25  | 0.745 | 1.46  | 0.013 | 1.3  | 0.024 | 1.33  | 0.133 |
| 1421528_a_at | surfeit gene 5                                                               | Surf5              | 1.03  | 0.625 | 1.42  | 0.007 | 1.34  | 0.007 | 1.3  | 0.009 | 1.48  | 0.025 |
| 1434552_at   | WD repeat domain 77                                                          | Wdr77              | -1.1  | 0.347 | 1.2   | 0.335 | 1.37  | 0.000 | 1.3  | 0.001 | 1.34  | 0.000 |
| 1436978_at   | wingless-type MMTV integration site 9A                                       | Wnt9a              | -1.05 | 0.438 | 1.23  | 0.459 | 1.31  | 0.496 | 1.3  | 0.036 | 1.13  | 0.354 |
| 1418291_at   | zinc finger protein 87                                                       | Zfp87              | 1.15  | 0.786 | 1.48  | 0.060 | 1.28  | 0.125 | 1.3  | 0.050 | 1.29  | 0.369 |
| 1421031_a_at | RIKEN cDNA 2310016C08 gene                                                   | 2310016C08Rik      | 1.12  | 0.597 | 1.47  | 0.003 | 1.29  | 0.067 | 1.31 | 0.002 | 1.21  | 0.066 |
| 1453081_at   | RIKEN cDNA 2410022M11 gene                                                   | 2410022M11Rik      | -1.19 | 0.397 | -1.11 | 0.458 | 1.01  | 0.920 | 1.31 | 0.026 | 1.67  | 0.002 |
| 1437110_at   | RIKEN cDNA 2810474O19 gene                                                   | 2810474O19Rik      | 1.07  | 0.362 | 1.4   | 0.166 | -1.05 | 0.593 | 1.31 | 0.014 | 1.27  | 0.034 |
| 1432583_at   | RIKEN cDNA 2900042E19 gene                                                   | 2900042E19Rik      | 1.63  | 0.913 | 1.05  | 0.617 | -1.01 | 0.988 | 1.31 | 0.021 | 2.12  | 0.172 |
| 1417734_at   | A kinase (PRKA) anchor protein 8-like                                        | Akap8l             | 1.11  | 0.783 | 1.48  | 0.034 | -1.03 | 0.487 | 1.31 | 0.044 | 1.11  | 0.365 |
| 1453736_s_at | RIKEN cDNA B230219D22 gene                                                   | B230219D22Rik      | 2.8   | 0.359 | 3.24  | 0.300 | 1.14  | 0.328 | 1.31 | 0.021 | -1.03 | 0.447 |
| 1442052_at   | RIKEN cDNA C330019G07 gene                                                   | C330019G07Rik      | 1.3   | 0.199 | 1.1   | 0.554 | -1.15 | 0.128 | 1.31 | 0.038 | -1.12 | 0.692 |
| 1415995_at   | caspase 6                                                                    | Casp6              | 2.7   | 0.210 | 3.5   | 0.114 | 1.18  | 0.060 | 1.31 | 0.001 | 1.35  | 0.083 |
| 1448382_at   | enoyl-Coenzyme A, hydratase/3-hydroxyacyl Coenzyme A dehydrogena             | Ehhadh             | 1.67  | 0.075 | 1.12  | 0.718 | 1.63  | 0.105 | 1.31 | 0.004 | -1.08 | 0.416 |
| 1455108_at   | eukaryotic translation initiation factor 4E member 2                         | Eif4e2             | -1.01 | 0.966 | 1.21  | 0.033 | 1.15  | 0.118 | 1.31 | 0.044 | 1.12  | 0.256 |
| 1436623_at   | ectonucleoside triphosphate diphosphohydrolase 7                             | Entpd7             | 1.56  | 0.148 | 1.25  | 0.121 | 1.05  | 0.630 | 1.31 | 0.022 | 1.09  | 0.459 |
| 1453102_at   | fibronectin leucine rich transmembrane protein 3                             | Ftr3               | 1.6   | 0.437 | 2.79  | 0.025 | 1.33  | 0.001 | 1.31 | 0.032 | 1.5   | 0.013 |
| 1425713_a_at | ring finger protein 146                                                      | Rnf146             | 1.97  | 0.426 | 2.44  | 0.185 | 1.02  | 0.831 | 1.31 | 0.002 | 1.06  | 0.645 |
| 1433892_at   | sperm associated antigen 5                                                   | Spag5              | 1.03  | 0.396 | 1.22  | 0.128 | 1.08  | 0.575 | 1.31 | 0.004 | 1.14  | 0.271 |
| 1418074_at   | ST6 (alpha-N-acetylneuraminyl-2,3-beta-galactosyl-1,3)-N-acetylgalact        | St6galnac4         | 1     | 0.884 | 1.25  | 0.242 | 1.16  | 0.144 | 1.31 | 0.031 | 1.35  | 0.039 |
| 1421485_at   | tau tubulin kinase 2                                                         | Ttk2               | -1.51 | 0.277 | -1.48 | 0.272 | 1.34  | 0.912 | 1.31 | 0.022 | -1.09 | 0.720 |
| 1428218_a_at | RIKEN cDNA 1600012H06 gene                                                   | 1600012H06Rik      | 1.18  | 0.230 | 1.4   | 0.041 | 1.12  | 0.365 | 1.32 | 0.011 | 1.17  | 0.159 |
| 1429961_at   | RIKEN cDNA 1700021C14 gene                                                   | 1700021C14Rik      | 1.42  | 0.279 | 1.16  | 0.640 | 1.28  | 0.557 | 1.32 | 0.046 | 1.07  | 0.885 |
| 1428400_at   | RIKEN cDNA 2200002K05 gene                                                   | 2200002K05Rik      | -1.14 | 0.434 | -1.18 | 0.422 | 1.51  | 0.070 | 1.32 | 0.049 | 1.16  | 0.235 |
| 1427050_at   | RIKEN cDNA 5730420B22 gene                                                   | 5730420B22Rik      | 1.58  | 0.373 | 1.29  | 0.512 | -1.16 | 0.172 | 1.32 | 0.018 | -1.13 | 0.323 |
| 1419831_at   | expressed sequence AA416453                                                  | AA416453           | 1.04  | 0.669 | 1.39  | 0.483 | 1.12  | 0.569 | 1.32 | 0.031 | -1.5  | 0.198 |
| 1438816_at   | AT hook containing transcription factor 1                                    | Ahctf1             | 1.04  | 0.561 | 1.1   | 0.581 | 1.11  | 1.000 | 1.32 | 0.026 | -1.04 | 0.502 |
| 1416374_at   | adaptor-related protein complex 3, mu 1 subunit /// similar to AP-3 compl    | Ap3m1 /// LOC6718  | 7.8   | 0.167 | 7.78  | 0.103 | 1.13  | 0.229 | 1.32 | 0.036 | 1.1   | 0.715 |
| 1444408_at   | RIKEN cDNA B130040O20 gene                                                   | B130040O20Rik      | -1.49 | 0.275 | -1.01 | 0.524 | 1.29  | 0.942 | 1.32 | 0.000 | -1.07 | 0.443 |
| 1424971_at   | coiled-coil domain containing 99                                             | Ccdc99             | 1.1   | 0.336 | 1.19  | 0.307 | 1.25  | 0.191 | 1.32 | 0.034 | 1.12  | 0.124 |
| 1439023_at   | DEAD (Asp-Glu-Ala-Asp) box polypeptide 55                                    | Ddx55              | 1.1   | 0.242 | 1.1   | 0.107 | 1.05  | 0.934 | 1.32 | 0.007 | -1.08 | 0.472 |
| 1448969_at   | FtsJ homolog 2 (E. coli)                                                     | Ftsj2              | 1.13  | 0.993 | 1.54  | 0.175 | 1.38  | 0.280 | 1.32 | 0.009 | 1.14  | 0.305 |

|              |                                                                                       |                     |       |       |       |       |       |       |       |       |       |       |
|--------------|---------------------------------------------------------------------------------------|---------------------|-------|-------|-------|-------|-------|-------|-------|-------|-------|-------|
| 1460206_at   | GRP1 (general receptor for phosphoinositides 1)-associated scaffold pro Grasp         | 6.01                | 0.281 | 7.21  | 0.134 | 1.54  | 0.046 | 1.32  | 0.014 | 1.19  | 0.173 |       |
| 1442183_at   | similar to carnitine deficiency-associated gene expressed in ventricle 3 is LOC236069 | 1.58                | 0.190 | -1.09 | 0.581 | 1.18  | 0.811 | 1.32  | 0.034 | -1.03 | 0.593 |       |
| 1417234_at   | matrix metalloproteinase 11                                                           | 1.62                | 0.315 | 1.57  | 0.252 | 1.16  | 0.160 | 1.32  | 0.031 | 1.31  | 0.017 |       |
| 1450087_a_at | nucleolar and coiled-body phosphoprotein 1                                            | Nolc1               | 1.68  | 0.346 | 1.89  | 0.020 | -1    | 0.959 | 1.32  | 0.022 | 1.11  | 0.357 |
| 1434469_at   | OTU domain containing 4                                                               | Otud4               | 1.64  | 0.325 | 1.8   | 0.157 | 1.09  | 0.224 | 1.32  | 0.016 | -1.1  | 0.340 |
| 1422026_at   | peptidase inhibitor 16                                                                | Pi16                | -1.03 | 0.540 | 1.2   | 0.756 | -1.1  | 0.420 | 1.32  | 0.001 | 1.28  | 0.094 |
| 1432538_a_at | replication factor C (activator 1) 3                                                  | Rfc3                | 4.97  | 0.204 | 6.5   | 0.028 | 1.34  | 0.099 | 1.32  | 0.025 | 1.24  | 0.015 |
| 1437476_at   | ribonucleotide reductase M2 B (TP53 inducible)                                        | Rrm2b               | 3.12  | 0.359 | 3.14  | 0.575 | 1.18  | 0.386 | 1.32  | 0.001 | -1.07 | 0.635 |
| 1434520_at   | sterol-C5-desaturase (fungal ERG3, delta-5-desaturase) homolog (S. cerevisiae)        | Sc5d                | 1.91  | 0.241 | 1.77  | 0.119 | 1.25  | 0.102 | 1.32  | 0.012 | 1.28  | 0.069 |
| 1455511_at   | selenophosphate synthetase 1                                                          | Sephs1              | 1.09  | 0.608 | 1.47  | 0.128 | 1.87  | 0.074 | 1.32  | 0.001 | 1.47  | 0.038 |
| 1424920_at   | solute carrier family 37 (glycerol-3-phosphate transporter), member 3                 | Slc37a3             | -1.01 | 0.644 | 1.08  | 0.746 | 1.06  | 0.644 | 1.32  | 0.025 | 1.19  | 0.557 |
| 1428010_at   | translocase of inner mitochondrial membrane 9 homolog (yeast)                         | Timm9               | 1.25  | 0.224 | 1.17  | 0.989 | 1.21  | 0.301 | 1.32  | 0.015 | 1.13  | 0.932 |
| 1451192_a_at | tetratricopeptide repeat domain 4                                                     | Ttc4                | 17.81 | 0.432 | 16.49 | 0.112 | 1.07  | 0.505 | 1.32  | 0.043 | 1.09  | 0.472 |
| 1456043_at   | ubiquitin specific peptidase 22                                                       | Usp22               | 17.33 | 0.441 | 20.36 | 0.403 | 1.12  | 0.228 | 1.32  | 0.036 | 1.16  | 0.156 |
| 1436004_at   | ubiquitin specific peptidase 27, X chromosome                                         | Usp27x              | -1.09 | 0.488 | 1.32  | 0.380 | 1.35  | 0.153 | 1.32  | 0.018 | 1.76  | 0.024 |
| 1417088_at   | zinc finger protein 346                                                               | Zfp346              | -1.03 | 0.622 | 1.14  | 0.331 | 1.44  | 0.080 | 1.32  | 0.003 | 1.38  | 0.005 |
| 1450410_a_at | RIKEN cDNA 4930570C03 gene                                                            | 4930570C03Rik       | 1.3   | 0.411 | 1.37  | 0.196 | 1.08  | 0.042 | 1.33  | 0.029 | 1.59  | 0.037 |
| 1454302_at   | RIKEN cDNA 5730410E19 gene                                                            | 5730410E19Rik       | 1.44  | 0.648 | 1.48  | 0.640 | -1.14 | 0.367 | 1.33  | 0.017 | 1.08  | 0.778 |
| 1431495_at   | RIKEN cDNA 6030440G07 gene                                                            | 6030440G07Rik       | 1.05  | 0.551 | -1.36 | 0.296 | -1.45 | 0.216 | 1.33  | 0.007 | 1.22  | 0.406 |
| 1442007_at   | RIKEN cDNA 9830124H08 gene                                                            | 9830124H08Rik       | 1.03  | 0.648 | 1.18  | 0.866 | 1.17  | 0.080 | 1.33  | 0.042 | 1.42  | 0.046 |
| 1436753_at   | aarF domain containing kinase 5                                                       | Adck5               | -1.03 | 0.263 | 1.1   | 0.192 | 1.18  | 0.380 | 1.33  | 0.014 | 1.47  | 0.104 |
| 1442745_x_at | expressed sequence C79248                                                             | C79248              | 1.25  | 0.340 | 1.31  | 0.112 | 1.09  | 0.943 | 1.33  | 0.019 | -1.17 | 0.060 |
| 1451702_at   | CKLF-like MARVEL transmembrane domain containing 7                                    | Cmtm7               | -1.07 | 0.440 | 1.29  | 0.028 | 1     | 0.945 | 1.33  | 0.023 | 1.19  | 0.281 |
| 1452210_at   | DNA2 DNA replication helicase 2-like (yeast)                                          | Dna2l               | 1.34  | 0.235 | 1.84  | 0.087 | 1.35  | 0.078 | 1.33  | 0.022 | 1.33  | 0.056 |
| 1452638_s_at | dynamitin 1-like                                                                      | Dnm1l               | 2.65  | 0.431 | 1.8   | 0.994 | -1.1  | 0.382 | 1.33  | 0.026 | 1.03  | 0.943 |
| 1451308_at   | elongation of very long chain fatty acids (FEN1/Elo2, SUR4/Elo3, yeast)-              | Elov14              | 1.03  | 0.959 | 1.12  | 0.401 | 1.19  | 0.310 | 1.33  | 0.006 | 1.45  | 0.319 |
| 1445898_at   | gamma-glutamyl carboxylase                                                            | Gcxc                | 1.3   | 0.381 | 1.07  | 0.751 | 1.07  | 0.333 | 1.33  | 0.004 | -1    | 0.968 |
| 1416481_s_at | HIG1 domain family, member 1A                                                         | Higd1a              | 1.06  | 0.697 | 1.32  | 0.206 | 1.58  | 0.077 | 1.33  | 0.017 | 1.32  | 0.011 |
| 1423104_at   | insulin receptor substrate 1                                                          | Irs1                | 1.41  | 0.165 | 1.98  | 0.109 | 1.32  | 0.007 | 1.33  | 0.004 | 1.23  | 0.017 |
| 1444651_at   | hypothetical LOC553089                                                                | LOC553089           | -1.09 | 0.464 | -1.06 | 0.614 | 1.02  | 0.565 | 1.33  | 0.049 | -1.13 | 0.309 |
| 1458508_at   | matrin 3                                                                              | Matr3               | 1.14  | 0.231 | 1.22  | 0.273 | -1.01 | 0.792 | 1.33  | 0.012 | -1.3  | 0.141 |
| 1419676_at   | myxovirus (influenza virus) resistance 2                                              | Mx2                 | 1.81  | 0.290 | 1.38  | 0.568 | 1.17  | 0.482 | 1.33  | 0.023 | 1.06  | 0.982 |
| 1420554_a_at | RAS-related C3 botulinum substrate 3                                                  | Rac3                | 1.06  | 0.764 | 1.14  | 0.286 | -1.01 | 0.810 | 1.33  | 0.008 | 1.32  | 0.058 |
| 1451517_at   | Rho-related BTB domain containing 2                                                   | Rhobtb2             | 1.26  | 0.139 | 1.85  | 0.256 | 1.1   | 0.643 | 1.33  | 0.041 | 1.43  | 0.073 |
| 1426958_at   | ribosomal protein S9 /// similar to ribosomal protein S9                              | Rps9 /// LOC272691  | 1.26  | 0.192 | 1.4   | 0.405 | 1.28  | 0.275 | 1.33  | 0.001 | 1.13  | 0.445 |
| 1424317_at   | solute carrier family 25 (mitochondrial deoxynucleotide carrier), member              | Slc25a19            | -1.17 | 0.429 | 1.56  | 0.948 | 1.29  | 0.670 | 1.33  | 0.001 | 1.1   | 0.992 |
| 1448706_at   | Traf and Tnf receptor associated protein                                              | Ttrap               | 1.35  | 0.128 | 1.38  | 0.004 | 1.13  | 0.120 | 1.33  | 0.012 | 1.17  | 0.100 |
| 1427831_s_at | zinc finger protein 260 /// similar to Zinc finger protein OZF (Zinc finger pi        | Zfp260 /// LOC63501 | 3.59  | 0.366 | 3.31  | 0.461 | 1.08  | 0.292 | 1.33  | 0.000 | -1.05 | 0.714 |
| 1450644_at   | zinc finger protein 36, C3H type-like 1                                               | Zfp36l1             | -1.03 | 0.752 | 1.4   | 0.022 | 1.55  | 0.030 | 1.33  | 0.016 | 1.57  | 0.000 |
| 1451281_at   | zinc finger protein 96                                                                | Zfp96               | -1.05 | 0.613 | 1.24  | 0.331 | 1.25  | 0.051 | 1.33  | 0.019 | 1.27  | 0.072 |
| 1439087_a_at | RIKEN cDNA 1500004A08 gene                                                            | 1500004A08Rik       | 1.48  | 0.114 | 2.08  | 0.017 | 1.13  | 0.476 | 1.34  | 0.024 | -1.02 | 0.812 |
| 1425297_at   | cDNA sequence BC012278                                                                | BC012278            | 1.26  | 0.542 | 1.52  | 0.092 | 1.04  | 0.272 | 1.34  | 0.036 | 1.19  | 0.123 |
| 1438089_a_at | BCL2-associated transcription factor 1                                                | Bclaf1              | 1.48  | 0.140 | 1.54  | 0.154 | -1    | 0.898 | 1.34  | 0.028 | -1.08 | 0.343 |
| 1437210_a_at | bromodomain containing 2                                                              | Brd2                | -1.06 | 0.299 | 1.16  | 0.120 | 1.07  | 0.706 | 1.34  | 0.002 | 1.39  | 0.039 |
| 1426002_a_at | cell division cycle 7 (S. cerevisiae)                                                 | Cdc7                | 1.12  | 0.274 | 1.35  | 0.010 | 1.24  | 0.275 | 1.34  | 0.019 | 1.22  | 0.272 |
| 1420545_a_at | chimerin (chimaerin) 1                                                                | Chn1                | 2.35  | 0.165 | 1.35  | 0.341 | -1.01 | 0.685 | 1.34  | 0.036 | 1.05  | 0.872 |
| 1426714_at   | DNA segment, Chr 11, ERATO Doi 18, expressed                                          | D11Ert18e           | 2.26  | 0.532 | 1.37  | 0.510 | -1.04 | 0.633 | 1.34  | 0.004 | 1.03  | 0.901 |
| 1438488_at   | esterase D/formylglutathione hydrolase                                                | Esd                 | -1.09 | 0.370 | -1.07 | 0.640 | 1.05  | 0.336 | 1.34  | 0.029 | 1.12  | 0.340 |
| 1460673_at   | folypolyglutamyl synthetase                                                           | Fpgs                | -1.03 | 0.575 | 1.37  | 0.251 | 1.22  | 0.375 | 1.34  | 0.013 | 1.37  | 0.004 |
| 1427554_at   | helicase, mus308-like (Drosophila)                                                    | Hel308              | 3.24  | 0.105 | 2.46  | 0.183 | 3.15  | 0.033 | 1.34  | 0.044 | -1.03 | 0.610 |
| 1440965_at   | Phosphatidylinositol glycan, class L                                                  | Pigl                | 1.09  | 0.989 | 1.16  | 0.572 | 1.24  | 0.040 | 1.34  | 0.006 | 1.06  | 0.022 |
| 1449480_at   | Sin3-associated polypeptide 18                                                        | Sap18               | 1.17  | 0.290 | 1.48  | 0.203 | 1.31  | 0.038 | 1.34  | 0.017 | 1.31  | 0.192 |
| 1450034_at   | signal transducer and activator of transcription 1                                    | Stat1               | 1.02  | 0.705 | -1.07 | 0.816 | 1.16  | 0.491 | 1.34  | 0.027 | 1.12  | 0.419 |
| 1448458_at   | topoisomerase (DNA) II beta                                                           | Top2b               | 3.51  | 0.223 | 2.16  | 0.394 | 1.01  | 0.652 | 1.34  | 0.047 | -1.2  | 0.465 |
| 1449391_at   | zinc finger protein 37                                                                | Zfp37               | 1.6   | 0.298 | 1.66  | 0.042 | 1.51  | 0.276 | 1.34  | 0.002 | 1.41  | 0.024 |
| 1425522_at   | RIKEN cDNA 2600011C06 gene                                                            | 2600011C06Rik       | 1.75  | 0.111 | 1.17  | 0.751 | -1.37 | 0.100 | 1.35  | 0.037 | -1.26 | 0.217 |
| 1431528_at   | RIKEN cDNA 5830427D02 gene                                                            | 5830427D02Rik       | -1.1  | 0.448 | -1.03 | 0.491 | 1.03  | 0.654 | 1.35  | 0.043 | 1     | 0.646 |
| 1450716_at   | a disintegrin-like and metalloproteinase (repolyisin type) with thrombospo            | Adamts1             | 1.09  | 0.215 | 1.27  | 0.083 | 1.35  | 0.001 | 1.35  | 0.039 | 1.49  | 0.059 |

|              |                                                                                            |               |       |       |       |       |       |       |      |       |       |       |
|--------------|--------------------------------------------------------------------------------------------|---------------|-------|-------|-------|-------|-------|-------|------|-------|-------|-------|
| 1441172_at   | AF4/FMR2 family, member 3                                                                  | Aff3          | -1.12 | 0.418 | -1.25 | 0.336 | 1.73  | 0.000 | 1.35 | 0.036 | 1.32  | 0.712 |
| 1454736_at   | ankyrin repeat domain 57                                                                   | Ankrd57       | 1.06  | 0.862 | 1.27  | 0.133 | 1.22  | 0.081 | 1.35 | 0.001 | 1.41  | 0.017 |
| 1454617_at   | arrestin domain containing 3                                                               | Arrdc3        | -1.05 | 0.719 | 1.4   | 0.142 | 1.58  | 0.007 | 1.35 | 0.021 | 1.71  | 0.025 |
| 1423512_at   | expressed sequence AW209491                                                                | AW209491      | 1.2   | 0.274 | 1.35  | 0.136 | 1.1   | 0.423 | 1.35 | 0.001 | 1.01  | 0.460 |
| 1433452_at   | RIKEN cDNA B630019K06 gene                                                                 | B630019K06Rik | 2.92  | 0.088 | 3.74  | 0.035 | 1.47  | 0.084 | 1.35 | 0.033 | 1.06  | 0.660 |
| 1440462_at   | RIKEN cDNA B930068K11 gene                                                                 | B930068K11Rik | -1.37 | 0.370 | -1.23 | 0.399 | 1.19  | 0.566 | 1.35 | 0.011 | 1.04  | 0.987 |
| 1436585_at   | expressed sequence BB182297                                                                | BB182297      | 1.6   | 0.412 | 1.44  | 0.453 | 1.06  | 0.826 | 1.35 | 0.045 | -1.14 | 0.375 |
| 1444416_at   | Centromere autoantigen A                                                                   | Cenpa         | -1.92 | 0.065 | 1.04  | 0.710 | 1.79  | 0.149 | 1.35 | 0.019 | -1.04 | 0.687 |
| 1460665_a_at | CCR4-NOT transcription complex, subunit 7                                                  | Cnot7         | 1.46  | 0.325 | 1.37  | 0.354 | 1.03  | 0.802 | 1.35 | 0.020 | -1.06 | 0.468 |
| 1452391_at   | coxsackievirus and adenovirus receptor                                                     | Cxadr         | -1    | 0.700 | 1.11  | 0.857 | 1.21  | 0.566 | 1.35 | 0.011 | 1.39  | 0.644 |
| 1433622_at   | gem (nuclear organelle) associated protein 4                                               | Gemin4        | 1.82  | 0.236 | 2.11  | 0.013 | 1.24  | 0.013 | 1.35 | 0.009 | 1.39  | 0.005 |
| 1423566_a_at | heat shock protein 110                                                                     | Hsp110        | 1.77  | 0.352 | 1.91  | 0.103 | 1.09  | 0.719 | 1.35 | 0.003 | 1.15  | 0.141 |
| 1431026_at   | N-acetyltransferase 12                                                                     | Nat12         | -1.17 | 0.434 | 1.21  | 0.886 | 1.25  | 0.237 | 1.35 | 0.005 | 1.68  | 0.037 |
| 1455035_s_at | nucleolar protein 5A                                                                       | Nol5a         | -1.09 | 0.417 | 1.26  | 0.522 | 1.18  | 0.067 | 1.35 | 0.002 | 1.23  | 0.011 |
| 1432012_a_at | NOL1/NOP2/Sun domain family 6                                                              | Nsun6         | 3.27  | 0.017 | 3.56  | 0.020 | 1.36  | 0.583 | 1.35 | 0.022 | -1.24 | 0.038 |
| 1428615_at   | purinergic receptor P2Y, G-protein coupled, 5                                              | P2ry5         | 1.24  | 0.018 | 1.7   | 0.043 | 1.44  | 0.019 | 1.35 | 0.009 | 1.52  | 0.011 |
| 1451624_a_at | phosphatase, orphan 2                                                                      | Phospho2      | 1.03  | 0.988 | 1.39  | 0.251 | 1.22  | 0.020 | 1.35 | 0.028 | 1.63  | 0.029 |
| 1451106_at   | RNA binding motif protein 21                                                               | Rbm21         | 1.18  | 0.165 | 1.55  | 0.028 | 1.17  | 0.242 | 1.35 | 0.014 | 1.44  | 0.023 |
| 1438516_at   | Rap1 interacting factor 1 homolog (yeast)                                                  | Rif1          | 1.47  | 0.302 | 1.21  | 0.691 | 1.14  | 0.554 | 1.35 | 0.007 | -1.2  | 0.288 |
| 1440986_at   | RNA polymerase II associated protein 1                                                     | Rpap1         | 1.86  | 0.163 | 1.57  | 0.025 | 2.5   | 0.587 | 1.35 | 0.042 | 1.61  | 0.522 |
| 1428805_at   | solute carrier family 35, member E3                                                        | Slc35e3       | 1.93  | 0.233 | 3.11  | 0.012 | 1.18  | 0.069 | 1.35 | 0.006 | 1.52  | 0.003 |
| 1429194_at   | tigger transposable element derived 2                                                      | Tigd2         | -1.09 | 0.464 | -1.03 | 0.525 | 1.09  | 0.281 | 1.35 | 0.043 | 1.38  | 0.010 |
| 1428074_at   | transmembrane protein 158                                                                  | Tmem158       | -1.13 | 0.479 | 1.64  | 0.129 | 1.67  | 0.107 | 1.35 | 0.034 | 1.71  | 0.027 |
| 1434495_at   | zinc finger protein 278                                                                    | Zfp278        | 1.93  | 0.263 | 2.46  | 0.069 | 1.14  | 0.736 | 1.35 | 0.021 | 1.72  | 0.007 |
| 1447403_a_at | Zinc finger, MYND domain containing 19                                                     | Zmynd19       | -1.1  | 0.476 | 1.31  | 0.040 | 1.12  | 0.443 | 1.35 | 0.015 | 1.26  | 0.034 |
| 1451189_at   | zinc finger, SWIM domain containing 1                                                      | Zswim1        | 1.12  | 0.522 | 1.45  | 0.012 | 1.12  | 0.044 | 1.35 | 0.015 | 1.41  | 0.045 |
| 1429869_at   | RIKEN cDNA 1110020C03 gene                                                                 | 1110020C03Rik | 1.31  | 0.871 | 1.46  | 0.588 | 1.72  | 0.647 | 1.36 | 0.033 | -1.28 | 0.277 |
| 1456430_at   | coiled-coil domain containing 39                                                           | Ccdc39        | 1.09  | 0.925 | 1.29  | 0.894 | 1.09  | 0.536 | 1.36 | 0.028 | -1.11 | 0.733 |
| 1417019_a_at | cell division cycle 6 homolog (S. cerevisiae)                                              | Cdc6          | -1.15 | 0.186 | 1.51  | 0.080 | 1.19  | 0.170 | 1.36 | 0.006 | 1.31  | 0.026 |
| 1449408_at   | junction adhesion molecule 2                                                               | Jam2          | -1.14 | 0.676 | -1.09 | 0.704 | 1.04  | 0.697 | 1.36 | 0.023 | -1.06 | 0.488 |
| 1423218_a_at | mitochondrial ribosomal protein L49                                                        | Mrp149        | 1.31  | 0.017 | 1.85  | 0.007 | 1.24  | 0.006 | 1.36 | 0.009 | 1.29  | 0.096 |
| 1457264_at   | PHD finger protein 20-like 1                                                               | Phf20l1       | 1.05  | 0.610 | 1.03  | 0.588 | 1.24  | 0.951 | 1.36 | 0.023 | -1.14 | 0.359 |
| 1436366_at   | protein phosphatase 1, regulatory (inhibitor) subunit 15b                                  | Ppp1r15b      | 1.45  | 0.237 | 1.6   | 0.452 | 1.16  | 0.982 | 1.36 | 0.047 | 1.53  | 0.071 |
| 1422552_at   | reprimin, TP53 dependent G2 arrest mediator candidate                                      | Rpm           | 1.6   | 0.294 | 4.18  | 0.007 | 1.31  | 0.022 | 1.36 | 0.042 | 2.34  | 0.011 |
| 1442129_at   | RIKEN cDNA 1810058I24 gene                                                                 | 1810058I24Rik | -1.32 | 0.145 | 1.04  | 0.922 | 1.14  | 0.101 | 1.37 | 0.026 | 1.13  | 0.337 |
| 1452268_at   | RIKEN cDNA 2810485I05 gene                                                                 | 2810485I05Rik | 2.47  | 0.226 | 2.27  | 0.362 | 1.22  | 0.018 | 1.37 | 0.007 | 1.09  | 0.340 |
| 1434532_at   | cDNA sequence BC035295                                                                     | BC035295      | -1.07 | 0.499 | 1.44  | 0.752 | 1.31  | 0.000 | 1.37 | 0.013 | 1.43  | 0.002 |
| 1449147_at   | carbohydrate (keratan sulfate Gal-6) sulfotransferase 1                                    | Chst1         | -1.15 | 0.441 | -1.07 | 0.620 | 1.62  | 0.092 | 1.37 | 0.046 | 1.23  | 0.674 |
| 1444378_at   | Casein kinase 1, delta                                                                     | Csnk1d        | 1.26  | 0.132 | 1.1   | 0.524 | 1.1   | 0.319 | 1.37 | 0.041 | 1.15  | 0.231 |
| 1435348_at   | RIKEN cDNA D930009K15 gene                                                                 | D930009K15Rik | 1.05  | 0.722 | 1.27  | 0.073 | 1.28  | 0.030 | 1.37 | 0.011 | 1.37  | 0.003 |
| 1431422_a_at | dual specificity phosphatase 14                                                            | Dusp14        | 1.88  | 0.299 | 2.21  | 0.031 | 1.32  | 0.019 | 1.37 | 0.006 | 1.27  | 0.039 |
| 1453689_at   | Fanconi anemia, complementation group E                                                    | Fance         | 1.67  | 0.665 | 1.44  | 0.824 | 1.08  | 0.740 | 1.37 | 0.045 | 1.14  | 0.471 |
| 1435213_at   | NHL repeat containing 1                                                                    | Nhlrc1        | -1.04 | 0.561 | 2.11  | 0.038 | -1.06 | 0.579 | 1.37 | 0.038 | 1.01  | 0.975 |
| 1423522_at   | nucleoplasmin 3 /// nucleoplasmin 3, pseudogene 1 /// similar to Nucleop Npm3 /// Npm3-ps1 | Npm3          | 1.36  | 0.055 | 1.55  | 0.054 | 1.12  | 0.701 | 1.37 | 0.011 | 1.25  | 0.078 |
| 1451773_s_at | polymerase (RNA) III (DNA directed) polypeptide F                                          | Polr3f        | 2.42  | 0.270 | 2.74  | 0.048 | -1.04 | 0.706 | 1.37 | 0.039 | -1.03 | 0.810 |
| 1424906_at   | PQ loop repeat containing                                                                  | Pqlc3         | 2.88  | 0.360 | 4.08  | 0.081 | 1.43  | 0.145 | 1.37 | 0.021 | 1.46  | 0.018 |
| 1428172_at   | PRP39 pre-mRNA processing factor 39 homolog (yeast)                                        | Prpf39        | 1.43  | 0.120 | 1.76  | 0.047 | 1.32  | 0.050 | 1.37 | 0.021 | 1.06  | 0.278 |
| 1439747_at   | prostaglandin E synthase                                                                   | Ptges         | 1.81  | 0.616 | 1.97  | 0.350 | 1.47  | 0.096 | 1.37 | 0.008 | 1.28  | 0.472 |
| 1455002_at   | protein tyrosine phosphatase 4a1                                                           | Ptp4a1        | 1.06  | 0.052 | 1.38  | 0.047 | 1.21  | 0.058 | 1.37 | 0.010 | 1.29  | 0.002 |
| 1429399_at   | ring finger protein 125                                                                    | Rnf125        | -1.36 | 0.067 | -1.21 | 0.181 | 1.48  | 0.050 | 1.37 | 0.008 | 1.49  | 0.054 |
| 1424581_at   | SH3 and cysteine rich domain 2                                                             | Stac2         | 1.01  | 0.842 | 1.02  | 0.899 | 1.09  | 0.245 | 1.37 | 0.031 | 1.37  | 0.165 |
| 1418163_at   | toll-like receptor 4                                                                       | Tlr4          | 1.13  | 0.110 | 1.22  | 0.289 | 1.11  | 0.570 | 1.37 | 0.032 | 1.11  | 0.204 |
| 1431504_at   | RIKEN cDNA 2310061N02 gene                                                                 | 2310061N02Rik | -1.55 | 0.121 | -1.03 | 0.775 | 1.25  | 0.749 | 1.38 | 0.001 | 1.36  | 0.675 |
| 1449122_at   | RIKEN cDNA 3110003A22 gene                                                                 | 3110003A22Rik | 1.36  | 0.496 | 1.98  | 0.021 | 1.36  | 0.005 | 1.38 | 0.040 | 1.08  | 0.535 |
| 1422535_at   | cyclin E2                                                                                  | Ccne2         | 1.07  | 0.667 | 1.54  | 0.097 | 1.26  | 0.060 | 1.38 | 0.043 | 1.39  | 0.029 |
| 1448364_at   | cyclin G2                                                                                  | Ccng2         | 4.9   | 0.271 | 5.52  | 0.140 | 1.37  | 0.002 | 1.38 | 0.035 | 1.18  | 0.306 |
| 1449402_at   | carbohydrate (N-acetylglucosamine) sulfotransferase 7                                      | Chst7         | -1.01 | 0.414 | -1.06 | 0.962 | 1.14  | 0.343 | 1.38 | 0.037 | 1.41  | 0.128 |
| 1454648_s_at | DNA segment, Chr 10, Wayne State University 102, expressed                                 | D10Wsu102e    | 1.35  | 0.463 | 1.72  | 0.014 | 1.18  | 0.012 | 1.38 | 0.006 | 1.3   | 0.026 |

|              |                                                                               |                    |       |       |       |       |       |       |      |       |       |       |
|--------------|-------------------------------------------------------------------------------|--------------------|-------|-------|-------|-------|-------|-------|------|-------|-------|-------|
| 1417412_at   | factor 8-associated gene A                                                    | F8a                | 2.33  | 0.320 | 3.02  | 0.086 | 1.23  | 0.328 | 1.38 | 0.019 | 2.26  | 0.280 |
| 1418060_a_at | mitogen activated protein kinase 7                                            | Mapk7              | 1.42  | 0.154 | 1.82  | 0.080 | 1.2   | 0.249 | 1.38 | 0.033 | 1.33  | 0.084 |
| 1416505_at   | nuclear receptor subfamily 4, group A, member 1                               | Nr4a1              | 1.34  | 0.031 | 2.01  | 0.033 | 1.48  | 0.004 | 1.38 | 0.001 | 1.56  | 0.010 |
| 1423666_s_at | ribosomal protein L5 /// similar to 60S ribosomal protein L5 /// similar to 6 | Rpl5 /// LOC382740 | -1.1  | 0.256 | 1.27  | 0.032 | 1.21  | 0.047 | 1.38 | 0.002 | 1.31  | 0.063 |
| 1432027_a_at | TBC1 domain family, member 14                                                 | Tbc1d14            | 3.07  | 0.770 | 4.08  | 0.160 | 1.06  | 0.447 | 1.38 | 0.014 | 1.23  | 0.653 |
| 1421139_a_at | zinc finger protein 386 (Kruppel-like)                                        | Zfp386             | 12.01 | 0.399 | 17.29 | 0.112 | 1.12  | 0.030 | 1.38 | 0.020 | 1.1   | 0.308 |
| 1426564_at   | zinc finger protein 553                                                       | Zfp553             | -1.14 | 0.301 | 1.27  | 0.576 | 1.26  | 0.118 | 1.38 | 0.021 | 1.23  | 0.405 |
| 1422954_at   | zinc finger protein 60                                                        | Zfp60              | 2.22  | 0.869 | 1.82  | 0.936 | -1.35 | 0.105 | 1.38 | 0.008 | 1.26  | 0.191 |
| 1441871_at   | RIKEN cDNA 1810044D09 gene                                                    | 1810044D09Rik      | -1.43 | 0.216 | -1.32 | 0.150 | 1.07  | 0.949 | 1.39 | 0.035 | -1.25 | 0.055 |
| 1420989_at   | RIKEN cDNA 4933411K20 gene                                                    | 4933411K20Rik      | 1.07  | 0.999 | 1.44  | 0.096 | 1.11  | 0.617 | 1.39 | 0.024 | 2.65  | 0.035 |
| 1419070_at   | cystin 1                                                                      | Cys1               | 1.8   | 0.191 | 1.91  | 0.001 | 1.06  | 0.752 | 1.39 | 0.032 | 1.4   | 0.474 |
| 1454229_a_at | exonuclease domain containing 1                                               | Exod1              | 1.88  | 0.010 | 2.25  | 0.095 | 1.06  | 0.906 | 1.39 | 0.030 | -1.06 | 0.818 |
| 1415842_at   | G protein beta subunit-like                                                   | Gbl                | 1.18  | 0.526 | 1.45  | 0.461 | 1.32  | 0.145 | 1.39 | 0.014 | 1.22  | 0.131 |
| 1449169_at   | hyaluronan synthase 2                                                         | Has2               | 1.41  | 0.023 | 1.81  | 0.113 | 1.36  | 0.005 | 1.39 | 0.003 | 1.38  | 0.023 |
| 1449262_s_at | lin-7 homolog C (C. elegans)                                                  | Lin7c              | 1.95  | 0.195 | 2.02  | 0.289 | 1.29  | 0.156 | 1.39 | 0.044 | 1.25  | 0.557 |
| 1433575_at   | similar to Transcription factor SOX-4                                         | LOC672274          | 1.53  | 0.189 | 2.22  | 0.048 | 1.45  | 0.012 | 1.39 | 0.011 | 1.56  | 0.000 |
| 1428950_s_at | nucleolar protein 8                                                           | Nol8               | 1.16  | 0.659 | 1.44  | 0.322 | -1    | 0.900 | 1.39 | 0.006 | 1.06  | 0.974 |
| 1438070_at   | PHD finger protein 3                                                          | Phf3               | 2.42  | 0.278 | 3.06  | 0.214 | 1.09  | 0.625 | 1.39 | 0.006 | 1.39  | 0.951 |
| 1424336_at   | phosphopantothenoylcysteine decarboxylase                                     | Ppcdc              | 1.43  | 0.628 | -1.01 | 0.267 | 1.08  | 0.756 | 1.39 | 0.042 | 1.48  | 0.011 |
| 1435167_at   | RAN binding protein 6                                                         | Ranbp6             | -1.35 | 0.276 | 1.23  | 0.846 | 1.2   | 0.091 | 1.39 | 0.021 | 1.46  | 0.082 |
| 1425974_a_at | tripartite motif protein 25                                                   | Trim25             | 1.2   | 0.507 | 1.43  | 0.017 | 1.26  | 0.089 | 1.39 | 0.001 | 1.5   | 0.023 |
| 1441412_s_at | tripartite motif-containing 45                                                | Trim45             | -1.05 | 0.493 | -1.07 | 0.532 | 1.53  | 0.014 | 1.39 | 0.015 | 1.17  | 0.189 |
| 1446855_at   | vacuolar protein sorting 13 D (yeast)                                         | Vps13d             | 1.11  | 0.963 | 1.09  | 0.830 | 1.88  | 0.097 | 1.39 | 0.035 | 1.15  | 0.859 |
| 1429734_at   | RIKEN cDNA 4632434111 gene                                                    | 4632434111Rik      | 1.45  | 0.010 | 2.17  | 0.002 | 1.35  | 0.157 | 1.4  | 0.002 | 1.57  | 0.048 |
| 1457260_at   | RIKEN cDNA 7530403E16 gene                                                    | 7530403E16Rik      | -1.02 | 0.552 | 1.14  | 0.596 | 1.46  | 0.004 | 1.4  | 0.024 | 1.29  | 0.182 |
| 1436021_at   | RIKEN cDNA A930031D07 gene                                                    | A930031D07Rik      | 1.25  | 0.600 | 1.41  | 0.735 | 2.66  | 0.240 | 1.4  | 0.040 | 2.48  | 0.087 |
| 1421690_s_at | agouti related protein                                                        | Agpr               | 1.5   | 0.818 | 2.33  | 0.543 | 1.78  | 0.955 | 1.4  | 0.031 | 1.41  | 0.972 |
| 1442977_at   | Procollagen, type III, alpha 1                                                | Col3a1             | 1.03  | 0.595 | 1.34  | 0.921 | 1.19  | 0.687 | 1.4  | 0.002 | 1.14  | 0.112 |
| 1455087_at   | DNA segment, Chr 7, ERATO Doi 715, expressed                                  | D7Ertdd715e        | 1.31  | 0.310 | -1.01 | 0.875 | 1.36  | 0.777 | 1.4  | 0.010 | 1.43  | 0.132 |
| 1439673_at   | RIKEN cDNA E230008O15 gene                                                    | E230008O15Rik      | 1.87  | 0.222 | 1.44  | 0.167 | -1.01 | 0.845 | 1.4  | 0.024 | 1.05  | 0.782 |
| 1450608_at   | histone 1, H1t                                                                | Hist1h1t           | -1.44 | 0.120 | 2.28  | 0.919 | -1.01 | 0.435 | 1.4  | 0.040 | 2.06  | 0.116 |
| 1427679_at   | large tumor suppressor                                                        | Lats1              | 1.57  | 0.261 | 1.7   | 0.027 | 1.04  | 0.992 | 1.4  | 0.034 | 1.07  | 0.815 |
| 1437198_at   | ligase III, DNA, ATP-dependent                                                | Lig3               | 1.1   | 0.640 | 1.19  | 0.155 | 1.13  | 0.096 | 1.4  | 0.019 | 1.08  | 0.559 |
| 1460348_at   | MAD2 mitotic arrest deficient-like 2 (yeast)                                  | Mad2l2             | 1.62  | 0.452 | 2.42  | 0.108 | 1.19  | 0.384 | 1.4  | 0.007 | 1.15  | 0.520 |
| 1455238_at   | melanoma associated antigen (mutated) 1-like 1                                | Mum1l1             | 1.36  | 0.100 | 1.63  | 0.045 | 1.46  | 0.009 | 1.4  | 0.011 | 1.1   | 0.240 |
| 1448722_s_at | phosphopantothenoylcysteine synthetase                                        | Ppcs               | -1.09 | 0.494 | 1.15  | 0.775 | 1.36  | 0.013 | 1.4  | 0.011 | 1.35  | 0.039 |
| 1460447_at   | pseudouridylate synthase 7 homolog (S. cerevisiae)-like                       | Pus7l              | -1.06 | 0.109 | 1.21  | 0.059 | 1.16  | 0.112 | 1.4  | 0.007 | 1.19  | 0.100 |
| 1448885_at   | RAP2B, member of RAS oncogene family                                          | Rap2b              | -1.1  | 0.614 | 1.11  | 0.672 | 1.2   | 0.256 | 1.4  | 0.000 | 1.41  | 0.087 |
| 1453843_at   | THAP domain containing 6                                                      | Thap6              | 2.89  | 0.625 | 2.46  | 0.058 | 1.58  | 0.087 | 1.4  | 0.013 | -1.21 | 0.418 |
| 1440560_at   | Yippee-like 2 (Drosophila)                                                    | Ypel2              | 1.66  | 0.245 | 1.2   | 0.722 | 2.7   | 0.332 | 1.4  | 0.035 | 1.07  | 0.715 |
| 1435333_at   | RIKEN cDNA 1110007M04 gene                                                    | 1110007M04Rik      | 1.12  | 0.087 | 1.39  | 0.101 | 1.27  | 0.005 | 1.41 | 0.027 | 1.3   | 0.015 |
| 1454556_at   | RIKEN cDNA 2700057C20 gene                                                    | 2700057C20Rik      | 2.26  | 0.204 | 1.39  | 0.985 | -1.01 | 0.828 | 1.41 | 0.008 | 2.28  | 0.678 |
| 1433801_at   | RIKEN cDNA 9930012K11 gene                                                    | 9930012K11Rik      | 1.1   | 0.598 | 1.39  | 0.054 | 1.26  | 0.255 | 1.41 | 0.026 | 1.51  | 0.059 |
| 1451631_at   | cDNA sequence BC021395                                                        | BC021395           | 2.69  | 0.345 | 1.91  | 0.249 | 1.04  | 0.970 | 1.41 | 0.028 | -1.03 | 0.507 |
| 1436543_at   | cDNA sequence BC034507                                                        | BC034507           | 1.34  | 0.145 | 1.55  | 0.009 | 1.06  | 0.548 | 1.41 | 0.010 | 1.22  | 0.254 |
| 1428968_at   | centrosomal protein 57                                                        | Cep57              | 1.53  | 0.213 | 1.72  | 0.055 | 1.16  | 0.086 | 1.41 | 0.014 | 1.26  | 0.178 |
| 1437341_x_at | cyclic nucleotide phosphodiesterase 1                                         | Cnp1d              | -1.03 | 0.558 | -1.06 | 0.431 | 1.26  | 0.286 | 1.41 | 0.037 | 1.04  | 0.786 |
| 1445260_at   | DCUN1D1 DCN1, defective in cullin neddylation 1, domain containing 1          | Dcun1d1            | -1.19 | 0.416 | -1.1  | 0.441 | 1.15  | 0.329 | 1.41 | 0.013 | -1.04 | 0.464 |
| 1424435_a_at | phosphoribosylglycinamide formyltransferase                                   | Gart               | 11.14 | 0.656 | 8.09  | 0.846 | -1    | 0.887 | 1.41 | 0.006 | 1.06  | 0.888 |
| 1425553_s_at | huntingtin interacting protein 1 related                                      | Hip1r              | 1.21  | 0.903 | -1.12 | 0.399 | 1.18  | 0.864 | 1.41 | 0.015 | 1.05  | 0.911 |
| 1441239_at   | potassium channel tetramerisation domain containing 18                        | Kctd18             | -1.02 | 0.757 | -1.04 | 0.506 | 1.21  | 0.368 | 1.41 | 0.050 | -1.01 | 0.647 |
| 1457083_at   | PRP31 pre-mRNA processing factor 31 homolog (yeast)                           | Prpf31             | 1.59  | 0.196 | 2.41  | 0.030 | 1.35  | 0.032 | 1.41 | 0.043 | 1.74  | 0.020 |
| 1418851_at   | tripartite motif protein 39                                                   | Trim39             | 1.05  | 0.788 | 1.34  | 0.080 | 1.17  | 0.354 | 1.41 | 0.032 | 1.17  | 0.471 |
| 1436819_at   | septin 6                                                                      | 6-Sep              | 1.42  | 0.101 | -1.22 | 0.341 | -1.02 | 0.753 | 1.42 | 0.039 | 1.18  | 0.554 |
| 1440486_at   | RIKEN cDNA 2310037I24 gene                                                    | 2310037I24Rik      | 1.55  | 0.352 | 1.3   | 0.378 | 1.64  | 0.743 | 1.42 | 0.040 | 1.23  | 0.504 |
| 1437427_at   | RIKEN cDNA 4933405O20 gene                                                    | 4933405O20Rik      | 1.25  | 0.284 | 1.1   | 0.827 | -1.01 | 0.496 | 1.42 | 0.043 | 1.38  | 0.177 |
| 1455218_at   | RIKEN cDNA 6330503K22 gene                                                    | 6330503K22Rik      | 4.6   | 0.321 | 6.4   | 0.063 | 1.31  | 0.321 | 1.42 | 0.020 | 1.25  | 0.114 |
| 1451552_at   | Similar to lipoyltransferase                                                  | MGC28431           | 1.43  | 0.443 | 1.67  | 0.015 | 1.25  | 0.046 | 1.42 | 0.027 | 1.44  | 0.103 |

|              |                                                                                              |                     |       |       |       |       |       |       |      |       |       |       |
|--------------|----------------------------------------------------------------------------------------------|---------------------|-------|-------|-------|-------|-------|-------|------|-------|-------|-------|
| 1434737_at   | oligonucleotide/oligosaccharide-binding fold containing 1                                    | Obfc1               | 1.59  | 0.023 | 1.85  | 0.060 | 1.2   | 0.371 | 1.42 | 0.013 | 1.3   | 0.073 |
| 1423314_s_at | phosphodiesterase 7A                                                                         | Pde7a               | 1.86  | 0.892 | 1.97  | 0.945 | 1.04  | 0.603 | 1.42 | 0.038 | -1.11 | 0.616 |
| 1448743_at   | synovial sarcoma, X breakpoint 2 interacting protein                                         | Ssx2ip              | 1.5   | 0.407 | 1.25  | 0.838 | 1.48  | 0.113 | 1.42 | 0.035 | 1.25  | 0.057 |
| 1429502_at   | stress 70 protein chaperone, microsome-associated, human homolog                             | Stch                | 2.21  | 0.246 | 2.49  | 0.191 | 1.22  | 0.099 | 1.42 | 0.006 | 1.04  | 0.800 |
| 1450090_at   | zinc finger protein 101                                                                      | Zfp101              | 1.36  | 0.002 | 1.19  | 0.136 | 1.12  | 0.507 | 1.42 | 0.037 | -1.08 | 0.374 |
| 1428550_at   | RIKEN cDNA 1810015A11 gene                                                                   | 1810015A11Rik       | 1.06  | 0.364 | 1.27  | 0.025 | 1.34  | 0.004 | 1.43 | 0.017 | 1.41  | 0.040 |
| 1424872_at   | RIKEN cDNA 2310001H12 gene /// similar to zinc finger protein 709 /// si                     | 2310001H12Rik /// L | 1.23  | 0.925 | 1.91  | 0.127 | 1.27  | 0.012 | 1.43 | 0.042 | 1.13  | 0.080 |
| 1432736_at   | RIKEN cDNA 4933430H06 gene                                                                   | 4933430H06Rik       | 1.1   | 0.955 | 1.02  | 0.862 | -1.12 | 0.536 | 1.43 | 0.013 | 1.15  | 0.889 |
| 1428694_at   | RIKEN cDNA 5033413D16 gene                                                                   | 5033413D16Rik       | 1.13  | 0.391 | 1.17  | 0.735 | 1.18  | 0.396 | 1.43 | 0.016 | 1.21  | 0.605 |
| 1433298_at   | RIKEN cDNA 5830461L22 gene                                                                   | 5830461L22Rik       | 1.79  | 0.967 | 2.98  | 0.501 | -1.05 | 0.524 | 1.43 | 0.007 | 1.36  | 0.440 |
| 1437684_at   | CDNA sequence BC025546                                                                       | BC025546            | 1.63  | 0.589 | 1.54  | 0.801 | 1.76  | 0.059 | 1.43 | 0.036 | 1.13  | 0.028 |
| 1424229_at   | dual-specificity tyrosine-(Y)-phosphorylation regulated kinase 3                             | Dyrk3               | 2.16  | 0.096 | 3.82  | 0.004 | 1.72  | 0.023 | 1.43 | 0.038 | 1.89  | 0.003 |
| 1445334_at   | similar to signal recognition particle 54                                                    | LOC665155           | 1.02  | 0.861 | 1.13  | 0.837 | 1.31  | 0.700 | 1.43 | 0.041 | 1.18  | 0.419 |
| 1420710_at   | reticuloendotheliosis oncogene                                                               | Rel                 | 1.53  | 0.097 | 2.11  | 0.013 | -1.44 | 0.111 | 1.43 | 0.035 | 1.14  | 0.696 |
| 1453711_at   | R-spondin family, member 4                                                                   | Rspo4               | 1.21  | 0.864 | 1.47  | 0.260 | 1.11  | 0.920 | 1.43 | 0.024 | -1.17 | 0.372 |
| 1452489_at   | vacuolar protein sorting 11 (yeast)                                                          | Vps11               | 1.21  | 0.938 | -1.35 | 0.268 | -1.2  | 0.302 | 1.43 | 0.015 | -1.45 | 0.139 |
| 1427985_at   | RIKEN cDNA 9630042H07 gene                                                                   | 9630042H07Rik       | 1.06  | 0.755 | 1.36  | 0.032 | 1.39  | 0.145 | 1.44 | 0.016 | 1.63  | 0.002 |
| 1459937_at   | Argininosuccinate synthetase 1                                                               | Ass1                | 1.06  | 0.953 | 1.46  | 0.090 | -1.17 | 0.316 | 1.44 | 0.017 | -1.12 | 0.490 |
| 1429444_at   | RAS-like, family 11, member A                                                                | Ras11a              | 3.42  | 0.655 | 4.68  | 0.179 | 1.25  | 0.868 | 1.44 | 0.048 | 1.5   | 0.090 |
| 1443882_at   | Solute carrier family 26 (sulfate transporter), member 2                                     | Slc26a2             | -1.05 | 0.512 | 1.13  | 0.678 | 1.17  | 0.047 | 1.44 | 0.037 | 1.1   | 0.967 |
| 1447657_s_at | synaptotidin 2-like                                                                          | Synpo2l             | 1.1   | 0.893 | 1.82  | 0.027 | 1.17  | 0.004 | 1.44 | 0.005 | 1.46  | 0.229 |
| 1458311_at   | ubiquitin specific peptidase 36                                                              | Usp36               | -1.09 | 0.477 | -1.14 | 0.364 | -1.03 | 0.630 | 1.44 | 0.038 | 1.33  | 0.132 |
| 1417803_at   | RIKEN cDNA 1110032A04 gene                                                                   | 1110032A04Rik       | 1.16  | 0.340 | 1.62  | 0.399 | 1.16  | 0.561 | 1.45 | 0.036 | -1.12 | 0.537 |
| 1423888_at   | RIKEN cDNA 1200003M09 gene                                                                   | 1200003M09Rik       | 1.79  | 0.756 | 1.79  | 0.505 | 1.23  | 0.117 | 1.45 | 0.028 | 1.33  | 0.531 |
| 1428370_at   | RIKEN cDNA 1500011B03 gene                                                                   | 1500011B03Rik       | 1.81  | 0.975 | 1.92  | 0.947 | 1.2   | 0.023 | 1.45 | 0.005 | 1.26  | 0.196 |
| 1460672_at   | RIKEN cDNA 2410002F23 gene                                                                   | 2410002F23Rik       | 2.09  | 0.469 | 2.41  | 0.052 | 1.22  | 0.055 | 1.45 | 0.047 | 1.19  | 0.136 |
| 1454466_at   | RIKEN cDNA 4933407I18 gene                                                                   | 4933407I18Rik       | 1.92  | 0.852 | 1.43  | 0.575 | 1.59  | 0.816 | 1.45 | 0.021 | 1.07  | 0.639 |
| 1426670_at   | agrin                                                                                        | Agtrin              | 1.86  | 0.700 | 2.13  | 0.452 | 1.15  | 0.864 | 1.45 | 0.001 | 1.22  | 0.340 |
| 1458500_at   | expressed sequence AU021034                                                                  | AU021034            | -1.48 | 0.197 | -1.6  | 0.156 | 1.25  | 0.982 | 1.45 | 0.001 | 1.21  | 0.360 |
| 1445281_a_at | RIKEN cDNA B230311B06 gene                                                                   | B230311B06Rik       | -1.27 | 0.164 | -1.53 | 0.220 | 1.26  | 0.829 | 1.45 | 0.005 | -1.09 | 0.698 |
| 1440340_at   | UDP-Gal:betaGal beta 1,3-galactosyltransferase, polypeptide 6                                | B3galt6             | -1.31 | 0.193 | -1.01 | 0.727 | 1.33  | 0.569 | 1.45 | 0.038 | 1.68  | 0.201 |
| 1437878_s_at | coiled-coil domain containing 39 /// tetratricopeptide repeat domain 14                      | Ccdc39 /// Ttc14    | 1.69  | 0.176 | 2.05  | 0.316 | 1.11  | 0.939 | 1.45 | 0.021 | -1.05 | 0.284 |
| 1420249_s_at | chemokine (C-C motif) ligand 6                                                               | Ccl6                | 1.5   | 0.315 | 1.49  | 0.208 | -1    | 0.656 | 1.45 | 0.001 | 3.12  | 0.042 |
| 1419744_at   | histocompatibility 2, class II, locus Mb2                                                    | H2-DMb2             | 1.02  | 0.626 | -1.01 | 0.596 | 1.04  | 0.657 | 1.45 | 0.045 | 1.81  | 0.045 |
| 1424988_at   | myosin regulatory light chain interacting protein                                            | Myliip              | 1.01  | 0.556 | 1.05  | 0.498 | 1.33  | 0.015 | 1.45 | 0.007 | 1.33  | 0.038 |
| 1444634_at   | NOL1/NOP2/Sun domain family 3                                                                | Nsun3               | 2.49  | 0.396 | 1.86  | 0.029 | 1.03  | 0.708 | 1.45 | 0.005 | 1.1   | 0.724 |
| 1417890_at   | pyridoxal (pyridoxine, vitamin B6) phosphatase                                               | Pdxp                | 1.03  | 0.382 | 1.42  | 0.004 | 1.27  | 0.074 | 1.45 | 0.004 | 1.38  | 0.105 |
| 1417237_at   | phospholipase D2                                                                             | Pld2                | -1.04 | 0.692 | -1.03 | 0.859 | 1.05  | 0.112 | 1.45 | 0.009 | 1.12  | 0.128 |
| 1424950_at   | SRY-box containing gene 9                                                                    | Sox9                | 2.02  | 0.348 | 2.18  | 0.320 | 1.38  | 0.479 | 1.45 | 0.039 | 1.27  | 0.265 |
| 1450403_at   | signal transducer and activator of transcription 2                                           | Stat2               | 1.14  | 0.961 | 1.2   | 0.888 | 1.34  | 0.638 | 1.45 | 0.047 | -1.04 | 0.569 |
| 1416926_at   | transformation related protein 53 inducible nuclear protein 1                                | Trp53inp1           | 1.12  | 0.621 | 2.52  | 0.002 | 1.79  | 0.000 | 1.45 | 0.047 | 1.69  | 0.003 |
| 1460488_at   | zinc finger and BTB domain containing 4                                                      | Zbtb4               | -1.26 | 0.180 | -1.26 | 0.462 | -1.29 | 0.216 | 1.45 | 0.005 | 1.02  | 0.478 |
| 1447976_at   | expressed sequence AI596198                                                                  | AI596198            | 1.84  | 0.298 | 2.36  | 0.398 | -1.02 | 0.659 | 1.46 | 0.043 | -1.11 | 0.310 |
| 1429897_a_at | DNA segment, Chr 16, ERATO Doi 472, expressed                                                | D16Ert472e          | 1.43  | 0.283 | 1.42  | 0.347 | 1.08  | 0.637 | 1.46 | 0.015 | 1.19  | 0.188 |
| 1423100_at   | FBJ osteosarcoma oncogene                                                                    | Fos                 | -1.01 | 0.953 | 1.62  | 0.005 | 1.36  | 0.029 | 1.46 | 0.003 | 1.53  | 0.003 |
| 1418876_at   | forkhead box D1                                                                              | Foxd1               | 1.28  | 0.530 | -1.07 | 0.545 | 1.12  | 0.786 | 1.46 | 0.046 | -1.48 | 0.266 |
| 1436648_at   | nanos homolog 1 (Drosophila)                                                                 | Nanos1              | 2.01  | 0.042 | 2.82  | 0.165 | 2.48  | 0.098 | 1.46 | 0.042 | 1.84  | 0.044 |
| 1455315_at   | tumor protein p53 inducible protein 13                                                       | Trp53i13            | -1.1  | 0.444 | 1.03  | 0.878 | 1.28  | 0.099 | 1.46 | 0.002 | 1.19  | 0.468 |
| 1436796_at   | RIKEN cDNA 1110061A14 gene                                                                   | 1110061A14Rik       | -1.01 | 0.774 | 1.22  | 0.333 | 1.16  | 0.060 | 1.47 | 0.020 | 1.27  | 0.011 |
| 1435565_at   | RIKEN cDNA 1500011H22 gene                                                                   | 1500011H22Rik       | 1.08  | 0.642 | 1.64  | 0.699 | 1.33  | 0.008 | 1.47 | 0.009 | 1.35  | 0.066 |
| 1423672_at   | RIKEN cDNA 2510042P03 gene                                                                   | 2510042P03Rik       | 1.28  | 0.475 | 1.38  | 0.121 | 1.18  | 0.293 | 1.47 | 0.017 | 1.24  | 0.054 |
| 1430248_at   | RIKEN cDNA 4930415O11 gene                                                                   | 4930415O11Rik       | 1.46  | 0.300 | 2.27  | 0.116 | 1.61  | 0.765 | 1.47 | 0.044 | 1.48  | 0.476 |
| 1427167_at   | expressed sequence AI448196                                                                  | AI448196            | 1.22  | 0.321 | 1.32  | 0.185 | 1.23  | 0.022 | 1.47 | 0.043 | 1.44  | 0.057 |
| 1448309_at   | adaptor-related protein complex 3, mu 1 subunit                                              | Ap3m1               | 7.34  | 0.308 | 7.34  | 0.147 | 1.07  | 0.562 | 1.47 | 0.045 | 1.14  | 0.718 |
| 1428750_at   | CDC42 effector protein (Rho GTPase binding) 2                                                | Cdc42ep2            | 4.51  | 0.388 | 6.99  | 0.211 | 1.19  | 0.376 | 1.47 | 0.049 | 1.13  | 0.238 |
| 1441003_at   | excision repair cross-complementing rodent repair deficiency, compleme                       | Ercc4               | 1.15  | 0.792 | -1.7  | 0.147 | -1.07 | 0.503 | 1.47 | 0.032 | -1.25 | 0.045 |
| 1424772_at   | H2A histone family, member J /// similar to H2A histone family, member . H2afj /// LOC632401 | H2afj /// LOC632401 | 2.52  | 0.510 | 3.71  | 0.037 | 1.71  | 0.057 | 1.47 | 0.045 | 1.52  | 0.113 |
| 1453995_a_at | HpaII tiny fragments locus 9c                                                                | Htf9c               | 1.55  | 0.115 | 1.78  | 0.054 | 1.23  | 0.425 | 1.47 | 0.042 | 1.44  | 0.036 |

|              |                                                                              |                    |       |       |       |       |       |       |      |       |       |       |
|--------------|------------------------------------------------------------------------------|--------------------|-------|-------|-------|-------|-------|-------|------|-------|-------|-------|
| 1416915_at   | mutS homolog 6 (E. coli)                                                     | Msh6               | 1.1   | 0.060 | 2.15  | 0.000 | 1.51  | 0.047 | 1.47 | 0.029 | 1.4   | 0.023 |
| 1444647_at   | phospholipase A2, activating protein                                         | Plaa               | 1.46  | 0.811 | 1.12  | 0.693 | 1.36  | 0.448 | 1.47 | 0.011 | 1.04  | 0.616 |
| 1449231_at   | zinc finger protein 296                                                      | Zfp296             | -1.01 | 0.813 | 1.49  | 0.041 | 1.21  | 0.105 | 1.47 | 0.019 | 1.81  | 0.019 |
| 1435449_at   | BCL2-like 11 (apoptosis facilitator)                                         | Bcl2l11            | 2.18  | 0.144 | 3.9   | 0.071 | 1.26  | 0.248 | 1.48 | 0.015 | 1.46  | 0.059 |
| 1421933_at   | chromobox homolog 5 (Drosophila HP1a)                                        | Cbx5               | 1.3   | 0.328 | 1.16  | 0.506 | 1.04  | 0.730 | 1.48 | 0.021 | 1.4   | 0.294 |
| 1439117_at   | calmin                                                                       | Clmn               | -1.02 | 0.940 | -1.45 | 0.134 | 1.14  | 0.602 | 1.48 | 0.024 | 1.94  | 0.637 |
| 1417001_a_at | DNA segment, Chr 4, Wayne State University 53, expressed                     | D4Wsu53e           | -1.3  | 0.167 | -1.21 | 0.359 | 1.04  | 0.937 | 1.48 | 0.010 | 1.17  | 0.476 |
| 1443136_at   | hypothetical gene supported by AK062906                                      | LOC432459          | 1.57  | 0.904 | 3.66  | 0.379 | 1.15  | 0.836 | 1.48 | 0.014 | 1.33  | 0.885 |
| 1442886_at   | transformer 2 alpha homolog (Drosophila)                                     | Tra2a              | 1.48  | 0.104 | 1.14  | 0.879 | 1.5   | 0.262 | 1.48 | 0.026 | 1.35  | 0.155 |
| 1448952_at   | RIKEN cDNA A030009H04 gene                                                   | A030009H04Rik      | 1.06  | 0.609 | 1.67  | 0.078 | 1.3   | 0.115 | 1.49 | 0.044 | 1.78  | 0.080 |
| 1440436_at   | hypothetical protein A730030A06                                              | A730030A06         | 2.61  | 0.697 | 3.73  | 0.992 | -1.08 | 0.537 | 1.49 | 0.016 | -1.08 | 0.565 |
| 1430826_s_at | glucosaminyl (N-acetyl) transferase 2, l-branching enzyme                    | Gcnt2              | 2.22  | 0.178 | 2.59  | 0.088 | 1.15  | 0.453 | 1.49 | 0.034 | 1.38  | 0.337 |
| 1425937_a_at | hexamethylene bis-acetamide inducible 1                                      | Hexim1             | 1.05  | 0.729 | 1.52  | 0.009 | 1.39  | 0.015 | 1.49 | 0.002 | 1.41  | 0.015 |
| 1446311_at   | membrane bound C2 domain containing protein                                  | Mbc2               | -1.24 | 0.379 | -1.52 | 0.263 | -1.06 | 0.585 | 1.49 | 0.021 | 1.12  | 0.921 |
| 1438933_x_at | RAS, guanyl releasing protein 2                                              | Rasgrp2            | -1.14 | 0.147 | 1.28  | 0.069 | 1.06  | 0.902 | 1.49 | 0.022 | 1.16  | 0.545 |
| 1416154_at   | signal recognition particle 54 /// similar to signal recognition particle 54 | Srp54 /// LOC66515 | 1.17  | 0.292 | -1.14 | 0.535 | 1.04  | 0.683 | 1.49 | 0.011 | -1.1  | 0.730 |
| 1417169_at   | ubiquitin specific peptidase 2                                               | Usp2               | 1.2   | 0.876 | 1.24  | 0.954 | 1.33  | 0.095 | 1.49 | 0.014 | 1.4   | 0.029 |
| 1451323_at   | zinc finger protein 7                                                        | Zfp7               | 1.25  | 0.645 | 1.71  | 0.062 | 1.52  | 0.002 | 1.49 | 0.006 | 1.61  | 0.046 |
| 1429927_at   | RIKEN cDNA 5830409B07 gene                                                   | 5830409B07Rik      | -1.3  | 0.044 | -2.19 | 0.063 | -1.13 | 0.444 | 1.5  | 0.032 | 1.21  | 0.408 |
| 1452367_at   | coronin, actin binding protein 2A                                            | Coro2a             | -1.05 | 0.467 | -1.3  | 0.232 | 1.37  | 0.206 | 1.5  | 0.008 | 1.28  | 0.700 |
| 1418322_at   | cAMP responsive element modulator                                            | Crem               | 1.11  | 0.936 | 1.25  | 0.275 | 1.32  | 0.048 | 1.49 | 0.013 | 1.34  | 0.243 |
| 1419728_at   | chemokine (C-X-C motif) ligand 5                                             | Cxcl5              | 1.27  | 0.843 | 1.27  | 0.877 | 1.43  | 0.090 | 1.5  | 0.028 | 1.06  | 0.356 |
| 1432181_s_at | endothelial cell growth factor 1 (platelet-derived)                          | Ecgf1              | 1.17  | 0.185 | 1.72  | 0.003 | 1.5   | 0.155 | 1.5  | 0.006 | 1.67  | 0.016 |
| 1419128_at   | integrin alpha X                                                             | Itgax              | 1.3   | 0.882 | 1.9   | 0.009 | -1.05 | 0.359 | 1.5  | 0.017 | -1.79 | 0.190 |
| 1455200_at   | p21 (CDKN1A)-activated kinase 6                                              | Pak6               | 1.01  | 0.442 | -1.31 | 0.378 | -1.51 | 0.237 | 1.5  | 0.038 | -1.07 | 0.613 |
| 1449370_at   | SRY-box containing gene 4 /// similar to Transcription factor SOX-4          | Sox4 /// LOC672274 | 1.04  | 0.137 | 1.63  | 0.065 | 1.78  | 0.033 | 1.5  | 0.022 | 1.78  | 0.018 |
| 1457951_at   | RIKEN cDNA 4930434E21 gene                                                   | 4930434E21Rik      | 1.37  | 0.601 | -1.37 | 0.202 | 1.41  | 0.562 | 1.51 | 0.010 | -1.26 | 0.217 |
| 1457913_at   | RIKEN cDNA 5730601F06 gene                                                   | 5730601F06Rik      | -1.07 | 0.424 | 1.12  | 0.787 | 1.19  | 0.037 | 1.51 | 0.026 | 1.27  | 0.440 |
| 1447952_at   | AU RNA binding protein/enoyl-coenzyme A hydratase                            | Auh                | 1.22  | 0.639 | 1.53  | 0.073 | 1.12  | 0.732 | 1.51 | 0.034 | 1.03  | 0.854 |
| 1450140_a_at | cyclin-dependent kinase inhibitor 2A                                         | Cdkn2a             | 1.21  | 0.288 | 1.15  | 0.468 | 1.38  | 0.962 | 1.51 | 0.041 | 1.22  | 0.479 |
| 1422787_at   | FK506 binding protein-like                                                   | Fkbp1              | 1.04  | 0.743 | 1.49  | 0.059 | -1.03 | 0.647 | 1.51 | 0.004 | 1.07  | 0.846 |
| 1418477_at   | matrilin 1, cartilage matrix protein 1                                       | Matn1              | 1.6   | 0.462 | 1.51  | 0.698 | 1.08  | 0.719 | 1.51 | 0.006 | -1.42 | 0.223 |
| 1451809_s_at | RWD domain containing 3                                                      | Rwd3               | -1.1  | 0.234 | -1.36 | 0.101 | 1.39  | 0.628 | 1.51 | 0.027 | 1.24  | 0.106 |
| 1449293_a_at | S-phase kinase-associated protein 2 (p45)                                    | Skp2               | 3.54  | 0.088 | 4.4   | 0.022 | 1.25  | 0.260 | 1.51 | 0.048 | 1.25  | 0.224 |
| 1447228_at   | RIKEN cDNA 1110051M20 gene                                                   | 1110051M20Rik      | -1.05 | 0.625 | -1.28 | 0.108 | -1.16 | 0.181 | 1.52 | 0.002 | 1.11  | 0.074 |
| 1449252_at   | RIKEN cDNA 9030611O19 gene                                                   | 9030611O19Rik      | 2.23  | 0.112 | 3.49  | 0.061 | 2.43  | 0.039 | 1.52 | 0.006 | 1.69  | 0.213 |
| 1457697_at   | RIKEN cDNA A330021E22 gene                                                   | A330021E22Rik      | 2.04  | 0.108 | 1.61  | 0.906 | 1.18  | 0.623 | 1.52 | 0.049 | 1.11  | 0.403 |
| 1436074_at   | cDNA sequence AY078069                                                       | AY078069           | -1.04 | 0.469 | 1.88  | 0.896 | 2.56  | 0.042 | 1.52 | 0.040 | 1.64  | 0.491 |
| 1422127_at   | desert hedgehog                                                              | Dhh                | -1.04 | 0.615 | -1.1  | 0.508 | 1.16  | 0.674 | 1.52 | 0.039 | 1.23  | 0.506 |
| 1449989_at   | mast cell protease 2                                                         | Mcpt2              | 2.46  | 0.551 | 2.5   | 0.239 | -1.85 | 0.136 | 1.52 | 0.025 | 1.43  | 0.397 |
| 1438479_at   | zinc finger protein 213                                                      | Zfp213             | 2.83  | 0.130 | 1.98  | 0.908 | 1.79  | 0.529 | 1.52 | 0.035 | 3.34  | 0.133 |
| 1458483_at   | RIKEN cDNA A330102I10 gene                                                   | A330102I10Rik      | 1.2   | 0.537 | 1.1   | 0.493 | -1.01 | 0.615 | 1.53 | 0.015 | 1.16  | 0.587 |
| 1457658_x_at | annexin A4                                                                   | Anxa4              | 1.39  | 0.067 | 1.51  | 0.070 | 1.22  | 0.138 | 1.53 | 0.015 | 1.13  | 0.613 |
| 1425362_at   | HIV-1 Rev binding protein-like                                               | Hrbl               | 1.03  | 0.785 | 1     | 0.907 | 1.3   | 0.374 | 1.53 | 0.016 | -1.05 | 0.614 |
| 1428033_at   | hypothetical protein LOC245174                                               | LOC245174          | -1.2  | 0.410 | 1.25  | 0.671 | 1.19  | 0.447 | 1.53 | 0.029 | 1.23  | 0.315 |
| 1423012_at   | synaptotagmin VII                                                            | Syt7               | 1.23  | 0.341 | 1.09  | 0.518 | 1.36  | 0.170 | 1.53 | 0.048 | 1.03  | 0.794 |
| 1460085_at   | Zinc finger protein 281                                                      | Zfp281             | -1.61 | 0.101 | -1.19 | 0.255 | 1.41  | 0.075 | 1.53 | 0.039 | 1.48  | 0.120 |
| 1424546_at   | cDNA sequence BC003965                                                       | BC003965           | 1.62  | 0.180 | 1.19  | 0.175 | 1.05  | 0.477 | 1.54 | 0.036 | 1.34  | 0.356 |
| 1456318_at   | C-type lectin domain family 1, member a                                      | Clec1a             | 1.33  | 0.490 | 1.46  | 0.278 | 1.86  | 0.646 | 1.54 | 0.027 | 2.48  | 0.422 |
| 1431049_at   | islet cell autoantigen 1-like                                                | Ica1l              | 1.13  | 0.332 | 2.46  | 0.219 | 1.14  | 0.374 | 1.54 | 0.005 | 2.59  | 0.125 |
| 1425145_at   | interleukin 1 receptor-like 1                                                | Il1rl1             | 1.07  | 0.958 | 1.49  | 0.240 | 1.24  | 0.055 | 1.54 | 0.003 | 1.33  | 0.063 |
| 1449160_at   | natriuretic peptide receptor 1                                               | Npr1               | -1.34 | 0.361 | -1.34 | 0.321 | -1.37 | 0.307 | 1.54 | 0.020 | 1.07  | 0.698 |
| 1455197_at   | Rho family GTPase 1                                                          | Rnd1               | 1.18  | 0.366 | 1.27  | 0.074 | 1.28  | 0.084 | 1.54 | 0.002 | 1.34  | 0.008 |
| 1437585_x_at | zinc finger protein 161                                                      | Zfp161             | -1.11 | 0.415 | 1.16  | 0.664 | 1.23  | 0.350 | 1.54 | 0.039 | 1.38  | 0.054 |
| 1421478_a_at | zinc finger protein 318                                                      | Zfp318             | -1.83 | 0.090 | 1.05  | 0.736 | 1.11  | 0.252 | 1.54 | 0.015 | 1.4   | 0.048 |
| 1440226_at   | zinc finger protein 760                                                      | Zfp760             | 1.18  | 0.606 | 1.22  | 0.475 | 1.38  | 0.061 | 1.54 | 0.034 | 1.17  | 0.229 |
| 1446122_at   | RIKEN cDNA 4732416N19 gene                                                   | 4732416N19Rik      | 1.32  | 0.920 | -1.18 | 0.128 | 1.17  | 0.772 | 1.55 | 0.044 | 1.22  | 0.601 |
| 1431173_at   | RIKEN cDNA A930008G19 gene                                                   | A930008G19Rik      | 1.27  | 0.904 | 1.5   | 0.361 | 1.13  | 0.567 | 1.55 | 0.021 | 1.23  | 0.899 |

|                |                                                                       |               |       |       |       |       |       |       |      |       |       |       |
|----------------|-----------------------------------------------------------------------|---------------|-------|-------|-------|-------|-------|-------|------|-------|-------|-------|
| 1429948_x_at   | crystallin, gamma F                                                   | Crygf         | 1.38  | 0.956 | 1.41  | 0.866 | 1.68  | 0.720 | 1.55 | 0.017 | -1.9  | 0.082 |
| 1427361_at     | homeo box C6                                                          | Hoxc6         | 1.46  | 0.547 | 1.9   | 0.379 | -1.15 | 0.205 | 1.55 | 0.028 | 1.12  | 0.773 |
| 1454075_s_at   | nudix (nucleoside diphosphate linked moiety X)-type motif 13          | Nudt13        | 1.23  | 0.251 | 1.04  | 0.691 | 1.3   | 0.417 | 1.55 | 0.022 | 1.53  | 0.072 |
| 1430242_at     | RWD domain containing 1                                               | Rwdd1         | -1.23 | 0.438 | 1.15  | 0.690 | 1.12  | 0.567 | 1.55 | 0.031 | 1.99  | 0.089 |
| 1420095_s_at   | zinc finger proliferation 1                                           | Zipro1        | -1.08 | 0.472 | 1.27  | 0.948 | 1.2   | 0.026 | 1.55 | 0.016 | 1.24  | 0.001 |
| 1445919_at     | expressed sequence AA409261                                           | AA409261      | 1.03  | 0.682 | 1.66  | 0.519 | -1.01 | 0.752 | 1.56 | 0.013 | 1.43  | 0.090 |
| 1454880_s_at   | Bcl2 modifying factor                                                 | Bmf           | -1.24 | 0.298 | -1.49 | 0.268 | 1.7   | 0.486 | 1.56 | 0.029 | -1.35 | 0.037 |
| 1447820_x_at   | carnitine palmitoyltransferase 2                                      | Cpt2          | 1.34  | 0.670 | 1.39  | 0.699 | -1.09 | 0.558 | 1.56 | 0.047 | -1.02 | 0.999 |
| 1444079_at     | defensin beta 8                                                       | Defb8         | -1.61 | 0.317 | -1.17 | 0.423 | 1.07  | 0.965 | 1.56 | 0.038 | 1.15  | 0.178 |
| 1429408_at     | TBC1 domain family, member 21                                         | Tbc1d21       | -1.91 | 0.133 | 1.63  | 0.326 | -1.02 | 0.482 | 1.56 | 0.013 | 1.23  | 0.601 |
| 1455705_at     | transmembrane protein 161A                                            | Tmem161a      | 1.41  | 0.408 | 1.42  | 0.405 | 1.57  | 0.367 | 1.56 | 0.047 | -1.19 | 0.227 |
| 1448738_at     | calbindin-28K                                                         | Calb1         | 1.39  | 0.751 | 1.75  | 0.503 | 2     | 0.204 | 1.57 | 0.047 | 2     | 0.207 |
| 1427088_at     | cyclin T2                                                             | Ccnt2         | -1.22 | 0.057 | 1.07  | 0.979 | 1.22  | 0.048 | 1.57 | 0.014 | 1.39  | 0.024 |
| 1417590_at     | cytochrome P450, family 27, subfamily a, polypeptide 1                | Cyp27a1       | 1.28  | 0.831 | -1.19 | 0.202 | 1.76  | 0.092 | 1.57 | 0.009 | -1.83 | 0.030 |
| 1426291_at     | DIM1 dimethyladenosine transferase 1-like (S. cerevisiae)             | Dimt1         | 1.04  | 0.960 | -1.16 | 0.312 | -1.21 | 0.039 | 1.57 | 0.022 | 1.28  | 0.166 |
| 1417860_a_at   | spondin 2, extracellular matrix protein                               | Spon2         | -1.16 | 0.336 | -1.08 | 0.726 | 1.74  | 0.862 | 1.57 | 0.048 | 2.03  | 0.761 |
| 1428803_at     | RIKEN cDNA 4632408A20 gene                                            | 4632408A20Rik | 2.11  | 0.278 | 2.53  | 0.038 | -1.09 | 0.460 | 1.58 | 0.006 | 1.25  | 0.078 |
| 1431621_at     | RIKEN cDNA 4930420G21 gene                                            | 4930420G21Rik | 1.24  | 0.671 | 1.37  | 0.586 | 1.6   | 0.165 | 1.58 | 0.045 | 1.68  | 0.841 |
| 1440886_at     | cell division cycle 37 homolog (S. cerevisiae)-like 1                 | Cdc37l1       | 1.07  | 0.879 | 1.44  | 0.141 | 1.7   | 0.043 | 1.58 | 0.024 | 1.52  | 0.007 |
| 1440900_at     | G protein-coupled receptor 174                                        | Gpr174        | -1.67 | 0.063 | 1.16  | 0.171 | 1.41  | 0.826 | 1.58 | 0.019 | 1.22  | 0.838 |
| 1454857_at     | ring finger protein 122                                               | Rnf122        | 3     | 0.333 | 4.85  | 0.042 | 1.39  | 0.024 | 1.58 | 0.034 | 1.83  | 0.017 |
| 1428905_at     | Ras-related GTP binding A                                             | Rraga         | 1.41  | 0.300 | 1.58  | 0.012 | 1.12  | 0.009 | 1.58 | 0.002 | 1.23  | 0.012 |
| 1419537_at     | transcription factor EC                                               | Tfec          | 2.4   | 0.144 | 1.16  | 0.557 | 1.36  | 0.034 | 1.58 | 0.041 | 1.1   | 0.699 |
| 1454633_at     | ethanolamine kinase 1                                                 | Etnk1         | 1.05  | 0.693 | 1.26  | 0.518 | -1.06 | 0.540 | 1.59 | 0.018 | 1.06  | 0.575 |
| 1418343_at     | GTF2I repeat domain containing 2                                      | Gtf2ird2      | -1.16 | 0.358 | -1.36 | 0.207 | 1.04  | 0.834 | 1.6  | 0.020 | 1.26  | 0.433 |
| 1445570_at     | NOL1/NOP2/Sun domain family, member 4                                 | Nsun4         | -1.46 | 0.144 | -1.16 | 0.463 | 1.06  | 0.609 | 1.6  | 0.032 | 1.14  | 0.389 |
| 1426082_a_at   | solute carrier family 16 (monocarboxylic acid transporters), member 4 | Slc16a4       | -1.38 | 0.274 | 1.04  | 0.799 | 2.07  | 0.155 | 1.6  | 0.002 | 1.04  | 0.902 |
| 1432963_at     | RIKEN cDNA 2410049M19 gene                                            | 2410049M19Rik | -1.64 | 0.200 | 1.25  | 0.634 | 1.01  | 0.653 | 1.61 | 0.044 | 1.65  | 0.292 |
| 1431775_at     | RIKEN cDNA 3100002H09 gene                                            | 3100002H09Rik | -1.25 | 0.329 | 2.05  | 0.433 | 2.39  | 0.328 | 1.61 | 0.015 | 1.52  | 0.526 |
| 1459500_at     | expressed sequence C85351                                             | C85351        | -2.54 | 0.049 | -1.47 | 0.205 | 1.42  | 0.412 | 1.61 | 0.048 | 1.49  | 0.721 |
| 1439332_at     | DNA-damage-inducible transcript 4-like                                | Ddit4l        | 1.72  | 0.024 | 3.45  | 0.004 | 2.23  | 0.002 | 1.61 | 0.014 | 2.04  | 0.169 |
| 1443940_at     | leucine rich repeat containing 22                                     | Lrrc22        | 1.67  | 0.490 | 1.23  | 0.926 | -1.45 | 0.205 | 1.61 | 0.005 | 2.06  | 0.309 |
| 1437833_at     | latent transforming growth factor beta binding protein 3              | Ltbp3         | -1.97 | 0.039 | -1.42 | 0.443 | 2.45  | 0.198 | 1.61 | 0.026 | -1.29 | 0.472 |
| 1459299_at     | myosin IIIB                                                           | Myo3b         | 1.68  | 0.124 | 1.1   | 0.961 | 1.07  | 0.841 | 1.61 | 0.043 | 3.14  | 0.242 |
| 1421646_a_at   | protein inhibitor of activated STAT 3                                 | Pias3         | 3.78  | 0.568 | 4.94  | 0.426 | 1.16  | 0.067 | 1.61 | 0.046 | 1.38  | 0.040 |
| 1439675_at     | RIKEN cDNA 4933429D07 gene                                            | 4933429D07Rik | -1.27 | 0.375 | 1.43  | 0.699 | -1.17 | 0.419 | 1.62 | 0.002 | -1.1  | 0.562 |
| 1442998_at     | Cytidine 5'-triphosphate synthase 2                                   | Ctps2         | 1.03  | 0.830 | -2.45 | 0.037 | 2.53  | 0.509 | 1.62 | 0.025 | 2.34  | 0.076 |
| 1417587_at     | timeless homolog (Drosophila)                                         | Timeless      | 1.01  | 0.990 | 1.2   | 0.450 | 1.23  | 0.094 | 1.62 | 0.017 | 1.3   | 0.072 |
| 1433823_at     | expressed sequence AW456874                                           | AW456874      | 1.14  | 0.187 | -1.13 | 0.510 | 1.48  | 0.092 | 1.63 | 0.026 | -1.03 | 0.843 |
| 1433043_at     | chondroitin sulfate proteoglycan 2                                    | Cspg2         | 1.64  | 0.623 | 3.13  | 0.124 | -1.05 | 0.505 | 1.63 | 0.032 | 2.75  | 0.003 |
| 1437337_x_at   | fucokinase                                                            | Fuk           | -1.11 | 0.482 | 1.15  | 0.826 | 1.26  | 0.742 | 1.63 | 0.024 | 1.35  | 0.380 |
| 1441271_at     | Isocitrate dehydrogenase 3 (NAD+) beta                                | Idh3b         | 2.2   | 0.014 | 1.33  | 0.459 | 1.21  | 0.862 | 1.63 | 0.038 | 1.51  | 0.143 |
| 1455034_at     | Nuclear receptor subfamily 4, group A, member 2                       | Nr4a2         | 1.28  | 0.905 | 2.01  | 0.042 | 2.06  | 0.003 | 1.63 | 0.002 | 2.37  | 0.002 |
| 1437713_x_at   | RIKEN cDNA 1500010J02 gene                                            | 1500010J02Rik | 1.71  | 0.756 | 1.43  | 0.589 | -1.1  | 0.482 | 1.64 | 0.002 | -1.4  | 0.277 |
| 1432890_at     | RIKEN cDNA 2610011E03 gene                                            | 2610011E03Rik | -1.03 | 0.811 | -1.36 | 0.241 | -2.01 | 0.063 | 1.64 | 0.041 | 1.98  | 0.098 |
| 1457122_at     | Adaptor protein complex AP-2, mu1                                     | Ap2m1         | 1.31  | 0.641 | 1.37  | 0.193 | 1.04  | 0.827 | 1.64 | 0.040 | -1.11 | 0.310 |
| 1435942_at     | potassium voltage-gated channel, subfamily Q, member 2                | Kcnq2         | -1.01 | 0.684 | 1.11  | 0.445 | -1.29 | 0.374 | 1.64 | 0.045 | -1.39 | 0.266 |
| 1449261_at     | pre B-cell leukemia transcription factor 2                            | Pbx2          | 5.72  | 0.649 | 4.51  | 0.615 | -1.01 | 0.941 | 1.64 | 0.011 | 1.04  | 0.695 |
| 1442956_at     | Protein phosphatase 1, regulatory (inhibitor) subunit 13B             | Ppp1r13b      | -1.23 | 0.159 | -1.72 | 0.088 | 1.1   | 0.625 | 1.64 | 0.036 | -1    | 0.422 |
| 1439610_at     | RAB27b, member RAS oncogene family                                    | Rab27b        | -1.08 | 0.456 | -1.31 | 0.311 | 1.49  | 0.127 | 1.64 | 0.018 | 1.39  | 0.323 |
| AFFX-TransRecM | transferrin receptor                                                  | Tfrc          | 2.11  | 0.401 | 1.56  | 0.720 | -1.14 | 0.548 | 1.64 | 0.015 | 1.22  | 0.263 |
| 1430099_at     | RIKEN cDNA 4930509E16 gene                                            | 4930509E16Rik | -1.17 | 0.688 | 2.51  | 0.105 | -1.41 | 0.350 | 1.65 | 0.011 | 2.08  | 0.526 |
| 1457049_at     | VATPase, H+ transporting, lysosomal V1 subunit E1                     | Atp6v1e1      | 1.46  | 0.098 | 2.51  | 0.315 | 1.61  | 0.212 | 1.65 | 0.037 | 1.54  | 0.358 |
| 1454839_a_at   | coiled-coil domain containing 84                                      | Ccdc84        | 1.28  | 0.840 | 1.26  | 0.946 | -1.07 | 0.408 | 1.65 | 0.012 | 1.13  | 0.675 |
| 1457550_at     | RIKEN cDNA 9530059O14 gene                                            | 9530059O14Rik | -1.95 | 0.079 | -2.36 | 0.139 | 1.87  | 0.534 | 1.66 | 0.034 | 1.86  | 0.872 |
| 1415999_at     | hairly/enhancer-of-split related with YRPW motif 1                    | Hey1          | 1.19  | 0.654 | 1.19  | 0.535 | 1.14  | 0.912 | 1.66 | 0.017 | 1.25  | 0.363 |
| 1427550_at     | paternally expressed 10                                               | Peg10         | 1.62  | 0.599 | 1.69  | 0.265 | 1.17  | 0.668 | 1.67 | 0.006 | -1.3  | 0.227 |
| 1438950_x_at   | resistance to inhibitors of cholinesterase 8 homolog (C. elegans)     | Ric8          | -1.15 | 0.450 | -1.11 | 0.641 | 2.04  | 0.469 | 1.67 | 0.016 | -1.32 | 0.445 |



|              |                                                                   |               |       |       |       |       |       |       |      |       |       |       |
|--------------|-------------------------------------------------------------------|---------------|-------|-------|-------|-------|-------|-------|------|-------|-------|-------|
| 1446687_at   | splicing factor 3a, subunit 1                                     | Sf3a1         | 1.1   | 0.856 | 1     | 0.686 | 1.39  | 0.031 | 1.67 | 0.016 | 1.03  | 0.980 |
| 1439241_x_at | steroid 5 alpha-reductase 2-like                                  | Srd5a2l       | -1.55 | 0.092 | -1.29 | 0.314 | -1.17 | 0.301 | 1.67 | 0.031 | 1.28  | 0.545 |
| 1424968_at   | RIKEN cDNA 2210023G05 gene                                        | 2210023G05Rik | 1.26  | 0.964 | 1.29  | 0.300 | 1.31  | 0.719 | 1.68 | 0.034 | -1.22 | 0.418 |
| 1433388_at   | RIKEN cDNA 2900022M07 gene                                        | 2900022M07Rik | 1.57  | 0.813 | -1    | 0.515 | -1.24 | 0.348 | 1.68 | 0.006 | 1.83  | 0.969 |
| 1446021_at   | expressed sequence AU018466                                       | AU018466      | 1.16  | 0.401 | 1.03  | 0.951 | 2.07  | 0.494 | 1.68 | 0.048 | 1.07  | 0.684 |
| 1430409_at   | N-ethylmaleimide sensitive fusion protein                         | Nsf           | 1.29  | 0.566 | 1.39  | 0.362 | -1    | 0.781 | 1.68 | 0.009 | 1.08  | 0.611 |
| 1436240_at   | sclerostin                                                        | Sost          | 1.06  | 0.449 | 1.19  | 0.356 | 1.28  | 0.113 | 1.68 | 0.012 | 1.04  | 0.596 |
| 1443837_x_at | B-cell leukemia/lymphoma 2                                        | Bcl2          | 1.47  | 0.499 | -1.23 | 0.383 | 4.44  | 0.216 | 1.69 | 0.035 | 1.75  | 0.029 |
| 1435905_at   | DNA segment, Chr 3, ERATO Doi 300, expressed                      | D3Erdt300e    | 1.03  | 0.795 | 1.22  | 0.587 | 1.06  | 0.569 | 1.69 | 0.032 | 1.36  | 0.134 |
| 1460609_at   | Integrator complex subunit 8                                      | Ints8         | 1.9   | 0.103 | 1.45  | 0.420 | -1.29 | 0.227 | 1.69 | 0.034 | 1.08  | 0.801 |
| 1443999_at   | NIMA (never in mitosis gene a)-related expressed kinase 2         | Nek2          | -1.3  | 0.086 | 1.05  | 0.957 | 1.71  | 0.083 | 1.69 | 0.008 | 1.36  | 0.505 |
| 1438341_at   | transglutaminase 4 (prostate)                                     | Tgm4          | 2.49  | 0.317 | 2.22  | 0.805 | -1.92 | 0.208 | 1.69 | 0.003 | 1.13  | 0.757 |
| 1428926_at   | RIKEN cDNA 1110003O08 gene                                        | 1110003O08Rik | -1.17 | 0.300 | -1    | 0.616 | 1.32  | 0.029 | 1.7  | 0.047 | 1.03  | 0.915 |
| 1426894_s_at | RIKEN cDNA C230093N12 gene                                        | C230093N12Rik | 1.27  | 0.315 | 1.72  | 0.038 | 1.43  | 0.108 | 1.71 | 0.000 | 1.61  | 0.089 |
| 1421288_at   | coagulation factor II (thrombin) receptor-like 3                  | F2rl3         | -2.61 | 0.060 | 1.47  | 0.136 | 2.57  | 0.496 | 1.71 | 0.041 | 1.83  | 0.409 |
| 1429396_at   | autophagy related 16 like 2 (S. cerevisiae)                       | Atg16l2       | 3.92  | 0.728 | 5.78  | 0.189 | 3.78  | 0.142 | 1.72 | 0.015 | 2.42  | 0.382 |
| 1456219_at   | similar to zinc finger protein of the cerebellum 5                | LOC624168     | 1.03  | 0.932 | 1.16  | 0.853 | 1.14  | 0.960 | 1.72 | 0.022 | 1.95  | 0.556 |
| 1447179_at   | RIKEN cDNA 2210412D01 gene                                        | 2210412D01Rik | 1.15  | 0.970 | -1.43 | 0.196 | 2.27  | 0.227 | 1.73 | 0.022 | 1.51  | 0.571 |
| 1431525_at   | RIKEN cDNA 9130002K18 gene                                        | 9130002K18Rik | -1.35 | 0.259 | -2.17 | 0.031 | 1.97  | 0.963 | 1.73 | 0.050 | -1.11 | 0.514 |
| 1454885_at   | cDNA sequence BC063263                                            | BC063263      | 1.14  | 0.871 | 1.64  | 0.092 | 1.3   | 0.248 | 1.73 | 0.011 | 1.71  | 0.111 |
| 1418992_at   | coagulation factor X                                              | F10           | 1.15  | 0.538 | 1.71  | 0.699 | 1.17  | 0.918 | 1.73 | 0.045 | 1.22  | 0.823 |
| 1441593_at   | Phosphatase and tensin homolog                                    | Pten          | -1.06 | 0.898 | -1.83 | 0.077 | 1.1   | 0.961 | 1.73 | 0.011 | 1.12  | 0.996 |
| 1450374_at   | tuberoinsulin peptide of 39 residues (TIP39) preprohormone        | Tfp39         | 1.37  | 0.556 | -1.03 | 0.861 | 1.08  | 0.705 | 1.73 | 0.001 | 1.11  | 0.898 |
| 1438541_at   | RIKEN cDNA 4933439F18 gene                                        | 4933439F18Rik | 1.95  | 0.248 | 2.67  | 0.230 | -2.3  | 0.008 | 1.74 | 0.049 | 3.69  | 0.227 |
| 1456328_at   | B-cell scaffold protein with ankyrin repeats 1                    | Bank1         | 1.29  | 0.814 | -1.08 | 0.397 | 1     | 0.997 | 1.74 | 0.010 | 1.05  | 0.744 |
| 1444761_at   | Coiled-coil domain containing 8                                   | Ccdc8         | 1     | 0.498 | 1.11  | 0.736 | 1.24  | 0.312 | 1.74 | 0.002 | 1.16  | 0.090 |
| 1432377_x_at | shroom family member 3                                            | Shroom3       | 1.2   | 0.748 | 1.4   | 0.554 | 1.08  | 0.970 | 1.74 | 0.023 | 2.41  | 0.583 |
| 1451696_at   | zinc finger protein 64                                            | Zfp64         | -1.09 | 0.335 | 1.31  | 0.640 | 1.11  | 0.980 | 1.74 | 0.032 | -1.27 | 0.392 |
| 1453706_at   | RIKEN cDNA 2900042A17 gene                                        | 2900042A17Rik | -1.1  | 0.427 | 1.41  | 0.636 | 1.24  | 0.644 | 1.75 | 0.036 | -1.56 | 0.075 |
| 1436219_at   | RIKEN cDNA 4933403F05 gene                                        | 4933403F05Rik | 1.4   | 0.038 | 2.63  | 0.005 | 1.56  | 0.008 | 1.75 | 0.002 | 1.69  | 0.008 |
| 1449993_at   | cDNA sequence AF119384                                            | AF119384      | 1.27  | 0.993 | -1.39 | 0.149 | -1.04 | 0.606 | 1.75 | 0.039 | 1.1   | 0.679 |
| 1430744_at   | napsin A aspartic peptidase                                       | Napsa         | 1.72  | 0.536 | 3.18  | 0.857 | 2.04  | 0.783 | 1.75 | 0.004 | 1.15  | 0.501 |
| 1422401_at   | small proline-rich protein 3                                      | Sprr3         | 2.35  | 0.815 | 1.3   | 0.855 | 1.48  | 0.908 | 1.75 | 0.019 | -1.34 | 0.136 |
| 1439311_at   | RIKEN cDNA B830012L14 gene                                        | B830012L14Rik | -1.19 | 0.426 | 1.22  | 0.460 | 1.25  | 0.631 | 1.76 | 0.030 | -1.17 | 0.363 |
| 1436374_x_at | F11 receptor                                                      | F11r          | -1.79 | 0.246 | -1.73 | 0.202 | 1.37  | 0.685 | 1.76 | 0.027 | 1.15  | 0.894 |
| 1451792_a_at | praja1, RING-H2 motif containing                                  | Pja1          | 5.03  | 0.551 | 5.77  | 0.346 | 1.27  | 0.229 | 1.76 | 0.035 | 1.12  | 0.405 |
| 1441236_at   | solute carrier family 9 (sodium/hydrogen exchanger), member 3     | Slc9a3        | -1.19 | 0.411 | -2.13 | 0.230 | 1.05  | 0.882 | 1.76 | 0.005 | 1.15  | 0.797 |
| 1420294_at   | Acytransferase like 2                                             | Aytl2         | 2.03  | 0.184 | 1.68  | 0.105 | -2.56 | 0.055 | 1.77 | 0.016 | -1.59 | 0.256 |
| 1442531_at   | DNA segment, Chr 12, ERATO Doi 123, expressed                     | D12Erdt123e   | 1.69  | 0.428 | 1.9   | 0.874 | 1.5   | 0.436 | 1.77 | 0.007 | 2.35  | 0.253 |
| 1422122_at   | Fc receptor, IgE, low affinity II, alpha polypeptide              | Fcgr2a        | 1.26  | 0.813 | 1.66  | 0.599 | 1.21  | 0.973 | 1.77 | 0.029 | -1.49 | 0.290 |
| 1420461_at   | macrophage stimulating 1 receptor (c-met-related tyrosine kinase) | Mst1r         | 2.23  | 0.614 | 1.11  | 0.587 | 1.41  | 0.700 | 1.77 | 0.037 | -1.49 | 0.070 |
| 1457320_at   | Wings apart-like homolog (Drosophila)                             | Wapal         | -1.52 | 0.425 | 1.23  | 0.929 | -1.11 | 0.380 | 1.77 | 0.041 | 1.99  | 0.374 |
| 1444144_at   | RIKEN cDNA 5530400K22 gene                                        | 5530400K22Rik | 2.06  | 0.419 | 2.16  | 0.498 | 1.24  | 0.206 | 1.78 | 0.024 | -1.02 | 0.704 |
| 1459922_at   | expressed sequence AI646383                                       | AI646383      | 2.2   | 0.717 | 1.75  | 0.381 | 1.18  | 0.633 | 1.78 | 0.030 | 1.19  | 0.994 |
| 1446991_at   | GCN1 general control of amino-acid synthesis 1-like 1 (yeast)     | Gcn1l1        | 2.58  | 0.266 | 1.8   | 0.973 | 1.38  | 0.883 | 1.78 | 0.026 | 2.33  | 0.543 |
| 1419325_at   | neuromedin U                                                      | Nmu           | 1.13  | 0.977 | 1.23  | 0.763 | -1.25 | 0.243 | 1.78 | 0.016 | 1.52  | 0.251 |
| 1425298_a_at | baculoviral IAP repeat-containing 1a                              | Birc1a        | 1.02  | 0.939 | -2.06 | 0.081 | 2.13  | 0.025 | 1.79 | 0.017 | 1.32  | 0.458 |
| 1446324_at   | Calcium channel, voltage-dependent, alpha2/delta subunit 1        | Cacna2d1      | 1.11  | 0.154 | 1.33  | 0.489 | 1.03  | 0.812 | 1.79 | 0.024 | 1.01  | 0.952 |
| 1451799_at   | coiled-coil domain containing 25                                  | Ccdc25        | 1.64  | 0.424 | 1.4   | 0.555 | -1.03 | 0.432 | 1.79 | 0.030 | -1.35 | 0.174 |
| 1458277_at   | Chemokine (C-C motif) ligand 25                                   | Ccl25         | -1.55 | 0.082 | -1.29 | 0.155 | 1.41  | 0.655 | 1.79 | 0.044 | 1.08  | 0.912 |
| 1446492_at   | transmembrane protein 132D                                        | Tmem132d      | 2.11  | 0.954 | 1.17  | 0.701 | 1.32  | 0.842 | 1.79 | 0.000 | 1.85  | 0.487 |
| 1428581_at   | RIKEN cDNA 1700024G10 gene                                        | 1700024G10Rik | -1.15 | 0.363 | 1.21  | 0.877 | -1.18 | 0.385 | 1.8  | 0.018 | 1.4   | 0.439 |
| 1459194_at   | RIKEN cDNA 2210408I21 gene                                        | 2210408I21Rik | -1.32 | 0.130 | -1.04 | 0.704 | -1.07 | 0.423 | 1.8  | 0.040 | -1.64 | 0.106 |
| 1419306_at   | coiled-coil domain containing 96                                  | Ccdc96        | -1.02 | 0.549 | 1.36  | 0.792 | -1.23 | 0.239 | 1.8  | 0.004 | 1.26  | 0.659 |
| 1442182_at   | DnaJ (Hsp40) homolog, subfamily C, member 19                      | Dnajc19       | 1.1   | 0.937 | 1.45  | 0.662 | 1.52  | 0.026 | 1.8  | 0.049 | 1.63  | 0.118 |
| 1441148_at   | Fukuyama type congenital muscular dystrophy homolog (human)       | Fcmd          | -1.54 | 0.192 | 1.07  | 0.571 | -1.18 | 0.310 | 1.8  | 0.031 | 1.26  | 0.864 |
| 1440396_at   | Membrane protein, palmitoylated 6 (MAGUK p55 subfamily member 6)  | Mpp6          | 1.15  | 0.937 | 1.69  | 0.677 | -1.53 | 0.222 | 1.8  | 0.017 | -1.28 | 0.479 |
| 1455894_at   | peptidyl-tRNA hydrolase 2                                         | Pth2          | 1.57  | 0.223 | 2.77  | 0.009 | 1.65  | 0.003 | 1.8  | 0.019 | 1.56  | 0.012 |

|              |                                                                                                      |               |       |       |       |       |       |       |      |       |       |       |
|--------------|------------------------------------------------------------------------------------------------------|---------------|-------|-------|-------|-------|-------|-------|------|-------|-------|-------|
| 1430361_at   | RIKEN cDNA 2610005M20 gene                                                                           | 2610005M20Rik | 1.82  | 0.985 | -1.22 | 0.378 | 2.19  | 0.579 | 1.81 | 0.039 | 1.55  | 0.408 |
| 1458000_at   | desmoglein 1 alpha                                                                                   | Dsg1a         | -2.26 | 0.039 | 1.16  | 0.964 | 1.01  | 0.521 | 1.81 | 0.027 | 2.01  | 0.750 |
| 1431748_a_at | ring finger and FYVE like domain containing protein                                                  | Rflf          | 2.6   | 0.085 | 1.4   | 0.190 | 1.45  | 0.921 | 1.81 | 0.033 | 1.91  | 0.045 |
| 1420658_at   | uncoupling protein 3 (mitochondrial, proton carrier)                                                 | Ucp3          | 1.61  | 0.883 | 1.87  | 0.104 | 1.41  | 0.905 | 1.81 | 0.004 | -1.23 | 0.465 |
| 1439325_at   | Bleomycin hydrolase                                                                                  | Blmh          | -1.29 | 0.417 | 1     | 0.704 | 2.56  | 0.082 | 1.82 | 0.040 | -1.56 | 0.075 |
| 1450441_at   | leucine rich repeat containing 50                                                                    | Lrrc50        | -1.52 | 0.103 | -1.12 | 0.649 | 1.32  | 0.376 | 1.82 | 0.046 | -1.45 | 0.198 |
| 1429379_at   | extra cellular link domain-containing 1                                                              | Xlkd1         | 2.17  | 0.522 | 1.01  | 0.541 | 1.31  | 0.742 | 1.82 | 0.039 | 2.07  | 0.591 |
| 1429751_at   | zinc finger, SWIM domain containing 2                                                                | Zswim2        | 1.53  | 0.949 | 1.75  | 0.458 | -1.18 | 0.445 | 1.82 | 0.024 | 1.2   | 0.765 |
| 1431234_at   | RIKEN cDNA 1700041B20 gene                                                                           | 1700041B20Rik | 1.04  | 0.951 | -1.01 | 0.940 | 1.13  | 0.547 | 1.83 | 0.008 | 1.07  | 0.550 |
| 1441440_at   | autophagy-related 4C (yeast)                                                                         | Atg4c         | 1.4   | 0.986 | 1.2   | 0.664 | -1.08 | 0.612 | 1.83 | 0.001 | 1.15  | 0.807 |
| 1456450_at   | Cystinosis, nephropathic                                                                             | Ctns          | -1.02 | 0.504 | 1.06  | 0.620 | -1.37 | 0.190 | 1.83 | 0.048 | 1.13  | 0.821 |
| 1436133_at   | RIKEN cDNA 0610011N22 gene                                                                           | 0610011N22Rik | 1.09  | 0.401 | 1.69  | 0.019 | 1.55  | 0.192 | 1.84 | 0.021 | 2.06  | 0.028 |
| 1460607_at   | immunoglobulin superfamily, member 11                                                                | Igsf11        | -1.06 | 0.189 | -1.02 | 0.704 | 1.57  | 0.108 | 1.84 | 0.021 | 1.55  | 0.101 |
| 1440483_at   | Pleckstrin homology domain containing, family M (with RUN domain) me                                 | Plekhm2       | 1.89  | 0.623 | 2.97  | 0.246 | 2.27  | 0.883 | 1.84 | 0.021 | -1.29 | 0.400 |
| 1431427_at   | RIKEN cDNA 5430427M07 gene                                                                           | 5430427M07Rik | 1.96  | 0.667 | 1.01  | 0.370 | -1    | 0.351 | 1.85 | 0.045 | 1.8   | 0.509 |
| 1419185_a_at | MLX interacting protein-like                                                                         | Mlxipl        | 1.12  | 0.206 | 1.51  | 0.222 | 1.58  | 0.496 | 1.85 | 0.036 | 1.7   | 0.497 |
| 1457815_at   | Nucleoporin 214                                                                                      | Nup214        | 1.24  | 0.793 | 1.38  | 0.813 | 1.93  | 0.128 | 1.85 | 0.020 | -1.47 | 0.140 |
| 1431161_at   | Rho-guanine nucleotide exchange factor                                                               | Rgnef         | 1.42  | 0.500 | 1.87  | 0.742 | 1.17  | 0.848 | 1.85 | 0.016 | 1.31  | 0.796 |
| 1428283_at   | cytochrome P450, family 2, subfamily s, polypeptide 1                                                | Cyp2s1        | -1.65 | 0.107 | 2.08  | 0.429 | 1.03  | 0.857 | 1.86 | 0.034 | 1.78  | 0.047 |
| 1457847_at   | Regulatory factor X domain containing 2 homolog (human)                                              | Rfxdc2        | 2.37  | 0.114 | 2.62  | 0.106 | 1.04  | 0.852 | 1.86 | 0.002 | -1.07 | 0.922 |
| 1433108_at   | T-cell receptor beta, joining region /// T-cell receptor beta, variable 8.2 /// Tcrb-J /// Tcrb-V8.2 | Tcrb-J        | 1.51  | 0.547 | 2.66  | 0.884 | 1.59  | 0.835 | 1.86 | 0.044 | 1.78  | 0.250 |
| 1443806_x_at | Erythrocyte protein band 4.1-like 1                                                                  | Epb4.1l1      | -1.22 | 0.274 | 2.53  | 0.693 | 1.33  | 0.893 | 1.87 | 0.034 | 1.29  | 0.754 |
| 1440450_at   | Heat shock protein 1-like                                                                            | Hspa1l        | 1.1   | 0.985 | 1.08  | 0.786 | -1    | 0.879 | 1.87 | 0.049 | 1.55  | 0.118 |
| 1458618_at   | Iron responsive element binding protein 2                                                            | Ireb2         | 1.74  | 0.378 | 2.43  | 0.134 | 1.08  | 0.692 | 1.87 | 0.006 | -1.05 | 0.428 |
| 1450195_at   | N-deacetylase/N-sulfotransferase (heparin glucosaminyl) 4                                            | Ndst4         | 1.74  | 0.766 | 3.04  | 0.947 | 1.32  | 0.742 | 1.89 | 0.048 | 1.76  | 0.285 |
| 1428780_at   | threonine aldolase 1                                                                                 | Tha1          | -1.09 | 0.444 | -2.18 | 0.097 | 1.09  | 0.787 | 1.89 | 0.007 | 1.09  | 0.832 |
| 1437260_at   | multimerin 1                                                                                         | Mmm1          | 1.12  | 0.708 | -1.02 | 0.967 | 2.82  | 0.379 | 1.91 | 0.014 | -1    | 0.967 |
| 1437018_at   | paraneoplastic antigen MA2                                                                           | Pnma2         | -1.18 | 0.380 | -1.23 | 0.322 | 1.14  | 0.904 | 1.91 | 0.021 | -1.01 | 0.761 |
| 1445235_at   | YTH domain family 3                                                                                  | Ythdf3        | 1.15  | 0.531 | 1.39  | 0.015 | -1.36 | 0.190 | 1.91 | 0.026 | -1.02 | 0.857 |
| 1435022_at   | cartilage homeo protein 1                                                                            | Cart1         | -2.26 | 0.194 | -1.11 | 0.405 | 1.05  | 0.894 | 1.92 | 0.029 | 1.7   | 0.588 |
| 1453794_at   | fer-1-like 4 (C. elegans)                                                                            | Fer1l4        | 1.68  | 0.105 | 1.4   | 0.081 | -1.07 | 0.583 | 1.92 | 0.028 | 2.21  | 0.142 |
| 1457593_at   | RIKEN cDNA 2610202C22 gene                                                                           | 2610202C22Rik | -1.22 | 0.053 | -1.1  | 0.600 | -1.19 | 0.524 | 1.94 | 0.003 | -1.06 | 0.953 |
| 1419334_at   | cytotoxic T-lymphocyte-associated protein 4                                                          | Ctla4         | 2.61  | 0.683 | 3.94  | 0.800 | 1.36  | 0.823 | 1.94 | 0.014 | 1.02  | 0.963 |
| 1458908_at   | Dystrobrevin alpha                                                                                   | Dtna          | -1.02 | 0.439 | 1.35  | 0.554 | 1.76  | 0.750 | 1.94 | 0.038 | 1.45  | 0.375 |
| 1417043_at   | lecithin cholesterol acyltransferase                                                                 | Lcat          | 1.36  | 0.136 | 1     | 0.785 | 1.51  | 0.068 | 1.94 | 0.020 | -1.14 | 0.503 |
| 1438363_at   | similar to KIAA1183 protein                                                                          | LOC434128     | 3.05  | 0.452 | 1.94  | 0.933 | 2.11  | 0.151 | 1.94 | 0.043 | -1.09 | 0.417 |
| 1442158_at   | microtubule associated serine/threonine kinase family member 4                                       | Mast4         | -1.18 | 0.396 | 1.41  | 0.775 | 1.03  | 0.674 | 1.94 | 0.046 | -1.03 | 0.788 |
| 1441215_at   | TraB domain containing                                                                               | Trabd         | 1.29  | 0.712 | 1.2   | 0.783 | -2.93 | 0.009 | 1.94 | 0.043 | 1.42  | 0.855 |
| 1428358_at   | RIKEN cDNA 1810010M01 gene                                                                           | 1810010M01Rik | -1.24 | 0.181 | -1.2  | 0.368 | 1.87  | 0.385 | 1.95 | 0.032 | 1.16  | 0.829 |
| 1446537_at   | Dendritic cell protein GA17                                                                          | Ga17          | 1.35  | 0.516 | 1.37  | 0.456 | -1.14 | 0.371 | 1.95 | 0.038 | 1.16  | 0.599 |
| 1429968_at   | RIKEN cDNA 2310047L11 gene                                                                           | 2310047L11Rik | -1.03 | 0.523 | 1.4   | 0.804 | 2.7   | 0.392 | 1.96 | 0.026 | 1.71  | 0.302 |
| 1455679_at   | RIKEN cDNA 5830411E10 gene                                                                           | 5830411E10Rik | 1.93  | 0.264 | 3.7   | 0.007 | 1.83  | 0.053 | 1.96 | 0.005 | 1.84  | 0.005 |
| 1456296_at   | RIKEN cDNA 5830418K08 gene                                                                           | 5830418K08Rik | 1.03  | 0.718 | 1.21  | 0.753 | 1.72  | 0.041 | 1.96 | 0.023 | -1.47 | 0.169 |
| 1444410_at   | acid phosphatase 6, lysophosphatidic                                                                 | Acp6          | 1.31  | 0.877 | 1.03  | 0.449 | 1.01  | 0.564 | 1.96 | 0.040 | 1.13  | 0.559 |
| 1429268_at   | RIKEN cDNA 2610318N02 gene                                                                           | 2610318N02Rik | 2.21  | 0.003 | 1.71  | 0.022 | -1.18 | 0.469 | 1.97 | 0.024 | 1.27  | 0.089 |
| 1444666_at   | brix domain containing 1                                                                             | Bxdc1         | 1.2   | 0.562 | -1.42 | 0.057 | -1.02 | 0.413 | 1.97 | 0.044 | 1.59  | 0.179 |
| 1441279_at   | RIKEN cDNA C430002E04 gene                                                                           | C430002E04Rik | -1.09 | 0.665 | -1.02 | 0.933 | 1.8   | 0.904 | 1.97 | 0.026 | -1.61 | 0.073 |
| 1452353_at   | G protein-coupled receptor 155                                                                       | Gpr155        | 1.47  | 0.670 | 1.35  | 0.628 | 2.24  | 0.101 | 1.97 | 0.008 | 2.45  | 0.011 |
| 1427813_at   | iduronate 2-sulfatase                                                                                | Ids           | 2.22  | 0.501 | 1.8   | 0.312 | 1.97  | 0.338 | 1.97 | 0.049 | 1.02  | 0.792 |
| 1450446_a_at | suppressor of cytokine signaling 1                                                                   | Socs1         | -1.07 | 0.351 | 1.91  | 0.580 | 1.86  | 0.387 | 1.97 | 0.032 | 1.35  | 0.561 |
| 1432277_at   | RIKEN cDNA 4930565D16 gene                                                                           | 4930565D16Rik | 1.21  | 0.984 | 1.74  | 0.856 | -1.24 | 0.171 | 1.98 | 0.030 | 1.6   | 0.142 |
| 1449971_a_at | CD209f antigen                                                                                       | Cd209f        | -2.15 | 0.217 | 1.13  | 0.460 | 2.04  | 0.042 | 1.98 | 0.035 | -1.36 | 0.231 |
| 1424303_at   | DEP domain containing 7                                                                              | Depdc7        | 1.07  | 0.576 | 1.07  | 0.288 | 3.42  | 0.033 | 1.98 | 0.020 | 2.96  | 0.026 |
| 1447033_at   | gene model 829, (NCBI)                                                                               | Gm829         | 1.47  | 0.909 | 1.37  | 0.991 | 1.2   | 0.807 | 1.98 | 0.015 | 2.4   | 0.159 |
| 1450273_at   | interleukin 1 receptor-like 2                                                                        | Il1rl2        | 1.88  | 0.496 | 1.05  | 0.502 | -1.12 | 0.411 | 1.98 | 0.039 | 1.24  | 0.675 |
| 1444429_at   | leucine-rich repeats and transmembrane domains 1                                                     | Lrtm1         | 1.44  | 0.613 | 1.7   | 0.736 | 1.01  | 0.827 | 1.98 | 0.035 | -1.26 | 0.192 |
| 1457893_at   | Protein tyrosine phosphatase-like A domain containing 2                                              | Ptpld2        | -1.9  | 0.095 | -1.62 | 0.154 | 2.28  | 0.587 | 1.98 | 0.039 | 1.06  | 0.828 |
| 1445156_at   | expressed sequence C81001                                                                            | C81001        | -1.31 | 0.465 | 1.63  | 0.064 | 1.71  | 0.578 | 1.99 | 0.037 | 1.16  | 0.803 |

|              |                                                                                      |               |       |       |       |       |       |       |      |       |       |       |
|--------------|--------------------------------------------------------------------------------------|---------------|-------|-------|-------|-------|-------|-------|------|-------|-------|-------|
| 1427528_a_at | Eph receptor A7                                                                      | Epha7         | -2.01 | 0.091 | 1.17  | 0.687 | 1.02  | 0.709 | 2    | 0.036 | -1.36 | 0.239 |
| 1455489_at   | leucine rich repeat transmembrane neuronal 2                                         | Lrrtm2        | 1.4   | 0.016 | 2.63  | 0.018 | 1.71  | 0.103 | 2    | 0.012 | 2.11  | 0.055 |
| 1458591_at   | RAS and EF hand domain containing                                                    | Rasef         | 1.36  | 0.627 | -1    | 0.440 | 1.04  | 0.616 | 2    | 0.032 | -2.48 | 0.046 |
| 1446760_at   | thyroid hormone receptor interactor 13                                               | Trip13        | 1.05  | 0.926 | -1.59 | 0.021 | 1.03  | 0.790 | 2    | 0.049 | -1    | 0.914 |
| 1422253_at   | procollagen, type X, alpha 1                                                         | Col10a1       | 1.96  | 0.066 | 2.6   | 0.069 | 2.02  | 0.127 | 2.02 | 0.049 | 2.65  | 0.083 |
| 1434227_at   | keratinocyte differentiation associated protein                                      | Krtdap        | 1.22  | 0.419 | 1.73  | 0.634 | -1.27 | 0.391 | 2.02 | 0.047 | -1.1  | 0.293 |
| 1445097_at   | Phosphatidylinositol 3 kinase, regulatory subunit, polypeptide 3 (p55)               | Pik3r3        | 1.14  | 0.796 | -1.06 | 0.526 | 2.88  | 0.163 | 2.03 | 0.027 | 1.13  | 0.842 |
| 1434425_at   | trichohyalin                                                                         | Tchh          | 1.71  | 0.526 | 2.22  | 0.651 | 1.6   | 0.304 | 2.03 | 0.011 | 1.86  | 0.390 |
| 1441033_at   | transmembrane and tetratricopeptide repeat containing 2                              | Tmtc2         | -1.09 | 0.482 | -1.09 | 0.627 | 1.65  | 0.034 | 2.03 | 0.040 | -1.03 | 0.561 |
| 1445895_at   | T-cell receptor beta, variable 8.2                                                   | Tcrb-V8.2     | 1.07  | 0.470 | 1.15  | 0.801 | -1.32 | 0.321 | 2.04 | 0.025 | 1.3   | 0.636 |
| 1443556_at   | RIKEN cDNA 1110007F12 gene                                                           | 1110007F12Rik | 1.74  | 0.452 | 1.76  | 0.287 | 1.01  | 0.642 | 2.05 | 0.023 | 1.54  | 0.592 |
| 1430201_at   | RIKEN cDNA 9130017K11 gene                                                           | 9130017K11Rik | 1.69  | 0.454 | -1.18 | 0.412 | 1.14  | 0.940 | 2.05 | 0.015 | 1.26  | 0.922 |
| 1447725_at   | RIKEN cDNA C030034E14 gene                                                           | C030034E14Rik | -1.54 | 0.108 | 1.02  | 0.718 | 2.09  | 0.204 | 2.05 | 0.048 | 1.17  | 0.865 |
| 1421773_at   | ets variant gene 2                                                                   | Etv2          | 2.54  | 0.237 | 2.49  | 0.584 | 1.62  | 0.443 | 2.05 | 0.026 | -1.02 | 0.716 |
| 1421575_at   | RIKEN cDNA 2310057N15 gene                                                           | 2310057N15Rik | 2.16  | 0.179 | 2.99  | 0.203 | 1.24  | 0.686 | 2.06 | 0.050 | 1.29  | 0.877 |
| 1431940_at   | hypothetical protein LOC74457                                                        | LOC74457      | 2.42  | 0.091 | 1.71  | 0.509 | 1.19  | 0.592 | 2.06 | 0.012 | 1.32  | 0.888 |
| 1436058_at   | radical S-adenosyl methionine domain containing 2                                    | Rsad2         | -1.18 | 0.325 | 1.78  | 0.608 | 2.09  | 0.561 | 2.06 | 0.044 | -1.55 | 0.414 |
| 1430094_at   | RIKEN cDNA 4931440L10 gene                                                           | 4931440L10Rik | 1.22  | 0.532 | -1.17 | 0.370 | 1.23  | 0.843 | 2.07 | 0.020 | 1.18  | 0.758 |
| 1433348_at   | RIKEN cDNA 2810414N06 gene                                                           | 2810414N06Rik | 1.19  | 0.383 | -1.09 | 0.520 | 2.5   | 0.384 | 2.08 | 0.037 | 1.45  | 0.984 |
| 1454649_at   | steroid 5 alpha-reductase 1                                                          | Srd5a1        | -1.11 | 0.283 | -1.37 | 0.087 | -1.03 | 0.675 | 2.08 | 0.044 | 1.44  | 0.001 |
| 1458684_at   | synovial sarcoma translocation, Chromosome 18                                        | Ss18          | -1.52 | 0.233 | -1.52 | 0.135 | 1.06  | 0.827 | 2.08 | 0.019 | 1.11  | 0.821 |
| 1426702_at   | RIKEN cDNA 4632419K20 gene                                                           | 4632419K20Rik | 1.44  | 0.487 | -1.04 | 0.629 | 1.35  | 0.914 | 2.09 | 0.045 | -1.03 | 0.543 |
| 1448675_at   | DNA segment, Chr 1, ERATO Doi 161, expressed                                         | D1Ertdd161e   | 2.27  | 0.608 | 2.32  | 0.933 | -1.14 | 0.292 | 2.09 | 0.044 | 1.23  | 0.333 |
| 1454261_at   | RIKEN cDNA E130304I02 gene                                                           | E130304I02Rik | 1.43  | 0.173 | -1.29 | 0.172 | 1.67  | 0.318 | 2.09 | 0.024 | 2.06  | 0.162 |
| 1426154_s_at | major urinary protein 1 /// major urinary protein 3                                  | Mup1 /// Mup3 | 1.2   | 0.650 | -1.5  | 0.307 | 1.14  | 0.533 | 2.09 | 0.023 | 1.38  | 0.495 |
| 1419429_at   | ciliary neurotrophic factor receptor                                                 | Cntrf         | -1.09 | 0.673 | 1.56  | 0.071 | 1.29  | 0.011 | 2.1  | 0.036 | 1.68  | 0.835 |
| 1439294_at   | hypothetical protein D530008I22                                                      | D530008I22    | 1.87  | 0.839 | 1.18  | 0.730 | -1.61 | 0.229 | 2.1  | 0.003 | 1.37  | 0.552 |
| 1441479_at   | Protein phosphatase 1B, magnesium dependent, beta isoform                            | Ppm1b         | 1.01  | 0.882 | 1.21  | 0.839 | 1.16  | 0.920 | 2.1  | 0.034 | -1.3  | 0.256 |
| 1417172_at   | ubiquitin-conjugating enzyme E2L 6                                                   | Ube2l6        | -1.52 | 0.188 | 1.52  | 0.381 | 1.25  | 0.452 | 2.1  | 0.041 | 1.19  | 0.716 |
| 1437955_at   | RIKEN cDNA 4922504M18 gene                                                           | 4922504M18Rik | -2.03 | 0.062 | 1.07  | 0.529 | 2.51  | 0.828 | 2.11 | 0.002 | -1.64 | 0.112 |
| 1442500_at   | expressed sequence C77406                                                            | C77406        | 1.39  | 0.914 | 1.37  | 0.973 | 1.02  | 0.871 | 2.11 | 0.011 | -1.11 | 0.331 |
| 1441095_at   | RIKEN cDNA A430041B07 gene                                                           | A430041B07Rik | -1.09 | 0.287 | -1.01 | 0.352 | 1.01  | 0.698 | 2.12 | 0.016 | 1.74  | 0.598 |
| 1437584_at   | Cyclin D3                                                                            | Ccnd3         | -1.44 | 0.116 | 1.58  | 0.173 | 1.66  | 0.689 | 2.12 | 0.047 | 1.58  | 0.457 |
| 1431851_at   | RIKEN cDNA 4930534P07 gene                                                           | 4930534P07Rik | 1.02  | 0.594 | 1.52  | 0.898 | -1.74 | 0.043 | 2.13 | 0.040 | 1.22  | 0.377 |
| 1436172_at   | hypothetical protein 9530028C05                                                      | 9530028C05    | 1.43  | 0.904 | 1.09  | 0.488 | 1.26  | 0.319 | 2.13 | 0.017 | 2.72  | 0.549 |
| 1457507_at   | Neuregulin 3                                                                         | Nrg3          | 1.79  | 0.292 | 1.56  | 0.366 | 1.19  | 0.684 | 2.13 | 0.037 | 1.5   | 0.399 |
| 1454220_at   | RIKEN cDNA 9330185C12 gene                                                           | 9330185C12Rik | -1.15 | 0.590 | -1.11 | 0.346 | -1.4  | 0.375 | 2.14 | 0.038 | 1.67  | 0.706 |
| 1453856_at   | BTB (POZ) domain containing 4                                                        | Btbd4         | 2.08  | 0.972 | 1.86  | 0.850 | 1.62  | 0.921 | 2.15 | 0.029 | 1.29  | 0.699 |
| 1456768_a_at | multimerin 2                                                                         | Mmmr2         | -1.04 | 0.578 | -1.03 | 0.478 | -1    | 0.546 | 2.16 | 0.031 | 1.92  | 0.390 |
| 1429929_at   | meiosis defective 1                                                                  | Mei1          | -1.09 | 0.288 | -1.52 | 0.181 | 1.97  | 0.008 | 2.17 | 0.002 | -1.36 | 0.255 |
| 1452112_a_at | RNA binding motif protein 4B                                                         | Rbm4b         | 1.2   | 0.458 | 2.08  | 0.004 | 1.34  | 0.206 | 2.17 | 0.004 | 1.29  | 0.385 |
| 1454187_at   | polycystic kidney disease 1 like 2                                                   | Pkd1l2        | 3.4   | 0.558 | 1.18  | 0.826 | 1.46  | 0.949 | 2.18 | 0.044 | 1.2   | 0.841 |
| 1434226_at   | cytochrome b-561 domain containing 1                                                 | Cyb561d1      | -1.02 | 0.482 | 1.36  | 0.110 | -1.45 | 0.212 | 2.19 | 0.009 | 1.49  | 0.810 |
| 1425595_at   | gamma-aminobutyric acid (GABA-B) receptor, 1                                         | Gabbr1        | -1.22 | 0.248 | 1.42  | 0.323 | -1.22 | 0.345 | 2.19 | 0.007 | 1.08  | 0.950 |
| 1420385_at   | guanine nucleotide binding protein, alpha 14                                         | Gna14         | 1.25  | 0.962 | 1.33  | 0.870 | 1.2   | 0.689 | 2.19 | 0.031 | -1.01 | 0.793 |
| 1451632_a_at | immunoglobulin heavy chain 1a (serum IgG2a)                                          | Igh-1a        | 1.82  | 0.261 | 1.25  | 0.513 | 1.27  | 0.367 | 2.19 | 0.017 | 1.05  | 0.811 |
| 1447119_at   | Transcription termination factor, RNA polymerase II                                  | Tf2           | 1.92  | 0.322 | 2.57  | 0.128 | 1.37  | 0.964 | 2.19 | 0.050 | 1.29  | 0.378 |
| 1442518_at   | RIKEN cDNA C030044O21 gene                                                           | C030044O21Rik | -2.52 | 0.084 | 1.03  | 0.840 | 1.03  | 0.812 | 2.2  | 0.041 | 1.74  | 0.569 |
| 1440979_at   | Insulin-like growth factor 2 receptor                                                | Igf2r         | 2.05  | 0.407 | 1.66  | 0.639 | 1.1   | 0.790 | 2.2  | 0.044 | 1.21  | 0.526 |
| 1440399_at   | Ubiquitin specific peptidase 32                                                      | Usp32         | 1.25  | 0.975 | 1.84  | 0.198 | 1.05  | 0.806 | 2.21 | 0.021 | 1.31  | 0.241 |
| 1438893_at   | RIKEN cDNA 5530601H04 gene                                                           | 5530601H04Rik | 1.54  | 0.209 | 2.36  | 0.030 | 2.13  | 0.758 | 2.22 | 0.035 | -1.1  | 0.875 |
| 1430453_a_at | Bcl2-like 2                                                                          | Bcl2l2        | 1.92  | 0.210 | 1.82  | 0.239 | 2.2   | 0.316 | 2.22 | 0.036 | 2     | 0.108 |
| 1427422_at   | similar to hepatocellular carcinoma-associated gene TD26                             | LOC624219     | 2.91  | 0.631 | 1.06  | 0.388 | 1.64  | 0.987 | 2.22 | 0.009 | -1.08 | 0.470 |
| 1454651_x_at | myelin basic protein                                                                 | Mbp           | 1.24  | 0.551 | -1.33 | 0.255 | 1.79  | 0.648 | 2.22 | 0.031 | -1.12 | 0.488 |
| 1429285_at   | serine (or cysteine) peptidase inhibitor, clade A (alpha-1 antiproteinae, i Serpina9 | Serpina9      | 1.99  | 0.464 | 1.65  | 0.539 | 1.72  | 0.325 | 2.22 | 0.012 | 1.88  | 0.578 |
| 1431792_a_at | serine/threonine kinase 11 interacting protein                                       | Stk11ip       | 1.45  | 0.649 | 1.66  | 0.339 | 1.39  | 0.463 | 2.22 | 0.024 | 1.89  | 0.794 |
| 1438240_at   | calicin                                                                              | Ccin          | -1.83 | 0.134 | 1.76  | 0.513 | 1.79  | 0.245 | 2.23 | 0.038 | 1.14  | 0.794 |
| 1435370_a_at | carboxylesterase 3                                                                   | Ces3          | -1.24 | 0.245 | 1.14  | 0.629 | -1.22 | 0.389 | 2.23 | 0.028 | -1.06 | 0.589 |

|              |                                                                               |                   |       |       |       |       |       |       |      |       |       |       |
|--------------|-------------------------------------------------------------------------------|-------------------|-------|-------|-------|-------|-------|-------|------|-------|-------|-------|
| 1434818_at   | hypothetical protein 9330159K06                                               | 9330159K06        | 1.31  | 0.675 | 1.06  | 0.532 | 2.48  | 0.673 | 2.24 | 0.042 | -1.14 | 0.532 |
| 1451704_at   | androgen binding protein delta                                                | Abpd              | 1.14  | 0.543 | 1.71  | 0.907 | 2.2   | 0.332 | 2.24 | 0.025 | 1.81  | 0.380 |
| 1425463_at   | GATA binding protein 6                                                        | Gata6             | 1.63  | 0.857 | 2.51  | 0.075 | 1.52  | 0.325 | 2.24 | 0.030 | 1.28  | 0.977 |
| 1430165_at   | serine/threonine kinase 17b (apoptosis-inducing)                              | Stk17b            | 1.3   | 0.397 | 1.12  | 0.942 | 1.62  | 0.068 | 2.24 | 0.006 | 1.56  | 0.972 |
| 1420794_at   | ADP-ribosyltransferase 2b                                                     | Art2b             | -1.07 | 0.672 | 1.41  | 0.495 | 1.33  | 0.792 | 2.25 | 0.016 | 1.82  | 0.313 |
| 1441047_at   | solute carrier family 45, member 4                                            | Slc45a4           | -1.64 | 0.068 | -1.89 | 0.016 | 1.36  | 0.302 | 2.25 | 0.030 | 2.38  | 0.614 |
| 1447233_at   | RIKEN cDNA D330027H18 gene                                                    | D330027H18Rik     | -1.25 | 0.321 | -1.7  | 0.002 | 1.35  | 0.976 | 2.26 | 0.006 | 1.49  | 0.079 |
| 1420289_at   | expressed sequence T25656                                                     | T25656            | 1.98  | 0.897 | 3.7   | 0.404 | 2.05  | 0.276 | 2.26 | 0.017 | 2.64  | 0.543 |
| 1455122_at   | patched domain containing 2                                                   | Ptchd2            | 1.38  | 0.149 | 1.39  | 0.042 | -1.48 | 0.037 | 2.27 | 0.042 | 1.44  | 0.918 |
| 1455840_at   | Rap guanine nucleotide exchange factor (GEF) 5                                | Rapgef5           | 1.17  | 0.784 | 1.65  | 0.042 | 1.69  | 0.633 | 2.27 | 0.023 | -1.64 | 0.078 |
| 1438160_x_at | solute carrier organic anion transporter family, member 4a1                   | Slco4a1           | -2.05 | 0.030 | 1.19  | 0.909 | 1.65  | 0.792 | 2.27 | 0.007 | -1.17 | 0.284 |
| 1441669_at   | centaurin, beta 2                                                             | Centb2            | 1.83  | 0.202 | 1.76  | 0.095 | 2.79  | 0.059 | 2.28 | 0.005 | 1.98  | 0.667 |
| 1429872_at   | RIKEN cDNA 1700007N14 gene                                                    | 1700007N14Rik     | 1.31  | 0.577 | -1.15 | 0.360 | 2.22  | 0.809 | 2.29 | 0.002 | 2.08  | 0.215 |
| 1456408_x_at | RIKEN cDNA 4933439C10 gene                                                    | 4933439C10Rik     | 4.79  | 0.630 | 3.49  | 0.525 | 2.54  | 0.290 | 2.29 | 0.016 | 1.13  | 0.837 |
| 1455088_at   | similar to Ser/Thr protein kinase PAR-1A /// similar to serine/threonine kin  | LOC381936 /// LOC | 1.43  | 0.416 | 1.28  | 0.418 | 1.78  | 0.819 | 2.29 | 0.046 | -1.01 | 0.501 |
| 1424510_at   | nudix (nucleoside diphosphate linked moiety X)-type motif 6                   | Nudt6             | 1.12  | 0.445 | 1.33  | 0.134 | 1.13  | 0.201 | 2.29 | 0.002 | 1.09  | 0.835 |
| 1449032_at   | prolactin-like protein M                                                      | Prlpm             | -1.02 | 0.442 | 1.36  | 0.659 | 1.06  | 0.903 | 2.29 | 0.043 | 2.11  | 0.004 |
| 1459692_at   | expressed sequence Al661323                                                   | Al661323          | 1.03  | 0.722 | 1.16  | 0.372 | 1.06  | 0.960 | 2.3  | 0.036 | 1.55  | 0.478 |
| 1460055_at   | Ecotropic viral integration site 2a                                           | Evi2a             | -1.18 | 0.311 | 1.09  | 0.775 | -1.05 | 0.654 | 2.3  | 0.014 | 1.9   | 0.491 |
| 1435154_at   | similar to solute carrier family 7 (cationic amino acid transporter, y+ syste | LOC245128         | 1.62  | 0.725 | 1.72  | 0.908 | -1.28 | 0.309 | 2.3  | 0.037 | 1.57  | 0.800 |
| 1440654_at   | Hypothetical protein LOC574403                                                | MGC99845          | 2.87  | 0.561 | 2.3   | 0.081 | 1.33  | 0.441 | 2.3  | 0.029 | 1.82  | 0.575 |
| 1431103_at   | RIKEN cDNA 1700003P14 gene                                                    | 1700003P14Rik     | -1.94 | 0.073 | 1.14  | 0.330 | -1.52 | 0.305 | 2.32 | 0.045 | 1.33  | 0.927 |
| 1445318_at   | Kelch-like 4 (Drosophila)                                                     | Klhl4             | 1.35  | 0.945 | -1.15 | 0.358 | -2.84 | 0.043 | 2.32 | 0.034 | -1.52 | 0.186 |
| 1428959_at   | RIKEN cDNA 5830405N20 gene                                                    | 5830405N20Rik     | -1.05 | 0.424 | -1    | 0.482 | -1.13 | 0.189 | 2.33 | 0.043 | -1.25 | 0.251 |
| 1433153_at   | RIKEN cDNA 9030201C23 gene                                                    | 9030201C23Rik     | 1.5   | 0.771 | -1.4  | 0.334 | -1    | 0.790 | 2.33 | 0.027 | 1.46  | 0.717 |
| 1420666_at   | double C2, beta                                                               | Doc2b             | -1.53 | 0.134 | -1.49 | 0.207 | 1.43  | 0.699 | 2.33 | 0.023 | 1.21  | 0.791 |
| 1441346_at   | RIKEN cDNA 2810421E14 gene                                                    | 2810421E14Rik     | 2.21  | 0.021 | 2.52  | 0.326 | -2.66 | 0.026 | 2.34 | 0.039 | 1.12  | 0.632 |
| 1431313_at   | RIKEN cDNA 5730442P18 gene                                                    | 5730442P18Rik     | 1.9   | 0.500 | 1.11  | 0.807 | 1.39  | 0.930 | 2.34 | 0.031 | 2.07  | 0.637 |
| 1425941_a_at | cDNA sequence BC025462                                                        | BC025462          | -1.14 | 0.598 | 1.28  | 0.617 | 2.44  | 0.070 | 2.34 | 0.046 | -1.82 | 0.059 |
| 1451553_at   | ADP-ribosyltransferase 5                                                      | Art5              | 1.51  | 0.922 | -1.44 | 0.215 | -1.31 | 0.306 | 2.35 | 0.025 | -1.69 | 0.166 |
| 1450555_at   | testis expressed gene 13                                                      | Tex13             | 1.2   | 0.714 | 2.04  | 0.875 | 1.25  | 0.729 | 2.35 | 0.033 | -1.05 | 0.429 |
| 1427018_at   | translin-associated factor X (Tsnax) interacting protein 1                    | Tsnaxip1          | 2.74  | 0.377 | 3.04  | 0.449 | -1.16 | 0.477 | 2.35 | 0.002 | 1.18  | 0.848 |
| 1432866_at   | RIKEN cDNA 6030442K20 gene                                                    | 6030442K20Rik     | 1.37  | 0.838 | 1.32  | 0.915 | -1    | 0.493 | 2.36 | 0.028 | -1.12 | 0.583 |
| 1442800_x_at | RIKEN cDNA A830059I20 gene                                                    | A830059I20Rik     | 2.24  | 0.921 | 2.44  | 0.437 | 2.37  | 0.057 | 2.36 | 0.013 | 1.81  | 0.426 |
| 1422708_at   | phosphoinositide-3-kinase, catalytic, gamma polypeptide                       | Pik3cg            | -1.54 | 0.162 | -1.64 | 0.148 | 3.13  | 0.011 | 2.36 | 0.049 | 1.7   | 0.483 |
| 1446289_at   | Serine/threonine kinase 3 (Ste20, yeast homolog)                              | Stk3              | -1.17 | 0.412 | 1.02  | 0.432 | 1.44  | 0.549 | 2.36 | 0.045 | 1.75  | 0.916 |
| 1459798_x_at | RIKEN cDNA 4732479N06 gene                                                    | 4732479N06Rik     | -1.26 | 0.287 | 2.11  | 0.849 | 2.3   | 0.063 | 2.37 | 0.001 | -1.24 | 0.318 |
| 1449854_at   | nuclear receptor subfamily 0, group B, member 2                               | Nr0b2             | 1.66  | 0.356 | -1.22 | 0.275 | -1.04 | 0.649 | 2.37 | 0.027 | -2.07 | 0.100 |
| 1428642_at   | solute carrier family 35, member D3                                           | Slc35d3           | 1.38  | 0.913 | 1.56  | 0.918 | -1.27 | 0.608 | 2.37 | 0.019 | -1.17 | 0.288 |
| 1455918_at   | adrenergic receptor, beta 3                                                   | Adrb3             | 2.99  | 0.757 | 5.74  | 0.357 | 1.31  | 0.868 | 2.39 | 0.022 | 1.73  | 0.349 |
| 1453658_at   | RIKEN cDNA 5830477G23 gene                                                    | 5830477G23Rik     | 2.15  | 0.336 | 1.31  | 0.132 | 1.01  | 0.977 | 2.4  | 0.034 | 1.12  | 0.954 |
| 1446462_at   | Histidyl tRNA synthetase 2                                                    | Hars2             | 1.63  | 0.719 | 1.4   | 0.738 | 1.22  | 0.861 | 2.4  | 0.035 | 1.18  | 0.748 |
| 1459236_at   | expressed sequence AU022436                                                   | AU022436          | 2.14  | 0.569 | 1.05  | 0.620 | -1.24 | 0.306 | 2.44 | 0.033 | -1.14 | 0.305 |
| 1438998_at   | RAS p21 protein activator 1                                                   | Rasa1             | 1.47  | 0.953 | 1.32  | 0.732 | 2.12  | 0.145 | 2.44 | 0.032 | 2.05  | 0.868 |
| 1430280_at   | RIKEN cDNA 1810062G17 gene                                                    | 1810062G17Rik     | 2.24  | 0.257 | 1.59  | 0.027 | 2.09  | 0.217 | 2.45 | 0.014 | 2.15  | 0.982 |
| 1449388_at   | thrombospondin 4                                                              | Thbs4             | -1.17 | 0.912 | -1.11 | 0.922 | -1.36 | 0.273 | 2.45 | 0.027 | -1.24 | 0.940 |
| 1438436_at   | RIKEN cDNA 6330407J23 gene                                                    | 6330407J23Rik     | 2.17  | 0.863 | 1.59  | 0.938 | -1.53 | 0.105 | 2.46 | 0.005 | 2.74  | 0.420 |
| 1458031_at   | RIKEN cDNA B230315F11 gene                                                    | B230315F11Rik     | 1.58  | 0.764 | 2.16  | 0.296 | 1.34  | 0.816 | 2.46 | 0.026 | 1.66  | 0.133 |
| 1453561_x_at | RIKEN cDNA 8430431K14 gene                                                    | 8430431K14Rik     | -1.18 | 0.052 | 1.38  | 0.192 | 1.52  | 0.283 | 2.47 | 0.000 | -1.01 | 0.670 |
| 1441826_x_at | Ubiquitin domain containing 1                                                 | Ubttd1            | 1.57  | 0.649 | 1.11  | 0.392 | -2.96 | 0.010 | 2.47 | 0.008 | 1.94  | 0.261 |
| 1441531_at   | phospholipase C, beta 4                                                       | Plcb4             | 1.87  | 0.343 | 2.44  | 0.351 | 1.07  | 0.864 | 2.48 | 0.032 | 1.63  | 0.115 |
| 1444453_at   | Trp53 regulating kinase                                                       | Trp53rk           | -1.26 | 0.424 | -1.29 | 0.145 | -1.42 | 0.032 | 2.48 | 0.031 | 1.37  | 0.838 |
| 1441434_at   | RIKEN cDNA 2810426N06 gene                                                    | 2810426N06Rik     | 1.81  | 0.689 | 1.7   | 0.438 | 2.05  | 0.493 | 2.49 | 0.028 | 1.29  | 0.734 |
| 1423458_at   | solute carrier family 35, member A5                                           | Slc35a5           | 1.24  | 0.765 | 1.86  | 0.386 | 1.88  | 0.479 | 2.51 | 0.031 | 1.46  | 0.510 |
| 1419411_at   | tachykinin 2                                                                  | Tac2              | 1.54  | 0.713 | -1.23 | 0.343 | 1.31  | 0.756 | 2.54 | 0.026 | 2.47  | 0.059 |
| 1444192_at   | RIKEN cDNA 9630020C08 gene                                                    | 9630020C08Rik     | -1.24 | 0.325 | 1.62  | 0.790 | 1.43  | 0.161 | 2.55 | 0.014 | 1.97  | 0.859 |
| 1450597_at   | olfactory receptor 870                                                        | Olfrr870          | 2.67  | 0.447 | 2.17  | 0.375 | 1.87  | 0.549 | 2.55 | 0.036 | -1.39 | 0.299 |
| 1443234_at   | CDNA sequence BC088983                                                        | BC088983          | 1.04  | 0.297 | 1.67  | 0.535 | -1.07 | 0.708 | 2.56 | 0.018 | -1.11 | 0.744 |

|              |                                                                          |                     |       |       |       |       |       |       |      |       |       |       |
|--------------|--------------------------------------------------------------------------|---------------------|-------|-------|-------|-------|-------|-------|------|-------|-------|-------|
| 1445934_at   | ariadne homolog 2 (Drosophila) /// similar to ariadne homolog 2          | Arih2 /// LOC432565 | 2.47  | 0.328 | 2.44  | 0.139 | 1.11  | 0.767 | 2.57 | 0.046 | 2.09  | 0.803 |
| 1446710_at   | expressed sequence C76669                                                | C76669              | 1.82  | 0.714 | 1.82  | 0.301 | -1.15 | 0.274 | 2.57 | 0.005 | 2.29  | 0.074 |
| 1460297_at   | nephrosis 2 homolog, podocin (human)                                     | Nphs2               | -1.12 | 0.345 | 1.45  | 0.867 | 1.29  | 0.308 | 2.57 | 0.020 | 1.58  | 0.940 |
| 1447510_at   | RIKEN cDNA C530014P21 gene                                               | C530014P21Rik       | 2.79  | 0.110 | 2.46  | 0.055 | 3.88  | 0.088 | 2.59 | 0.000 | 1.52  | 0.376 |
| 1440598_at   | syntrophin, gamma 1                                                      | Sntg1               | 1.26  | 0.949 | -1.7  | 0.141 | 1.2   | 0.014 | 2.59 | 0.013 | 1.94  | 0.517 |
| 1420347_at   | palate, lung, and nasal epithelium carcinoma associated                  | Plunc               | 1.47  | 0.670 | 1.51  | 0.890 | 1.16  | 0.724 | 2.6  | 0.046 | 1.57  | 0.234 |
| 1432267_at   | RIKEN cDNA 6720483E21 gene                                               | 6720483E21Rik       | -1.29 | 0.386 | 1.11  | 0.897 | 1.01  | 0.710 | 2.61 | 0.043 | 2.02  | 0.316 |
| 1435996_at   | caspase recruitment domain family, member 11                             | Card11              | -1.04 | 0.473 | 1.73  | 0.999 | 1.35  | 0.860 | 2.61 | 0.018 | 1.4   | 0.781 |
| 1457308_at   | Ubiquitin specific peptidase 45                                          | Usp45               | 2.83  | 0.036 | 2.14  | 0.451 | 1.13  | 0.880 | 2.62 | 0.043 | -1.78 | 0.064 |
| 1432348_at   | RIKEN cDNA 4930524O07 gene                                               | 4930524O07Rik       | 1.32  | 0.664 | -2.04 | 0.229 | 1.67  | 0.098 | 2.63 | 0.015 | -1.15 | 0.554 |
| 1457807_at   | Glucosamine-phosphate N-acetyltransferase 1                              | Gnpat1              | -1.12 | 0.551 | 1.13  | 0.959 | 1.3   | 0.589 | 2.63 | 0.001 | 1.66  | 0.854 |
| 1431620_at   | RIKEN cDNA 4930442J19 gene                                               | 4930442J19Rik       | 1.2   | 0.808 | 1.17  | 0.701 | 1.02  | 0.720 | 2.64 | 0.039 | 2.2   | 0.500 |
| 1458799_at   | RIKEN cDNA A330033J07 gene                                               | A330033J07Rik       | -1.26 | 0.267 | -1.08 | 0.428 | -1.83 | 0.085 | 2.64 | 0.009 | 1.24  | 0.745 |
| 1447166_at   | RIKEN cDNA E230002P03 gene                                               | E230002P03Rik       | -2.13 | 0.107 | -1.22 | 0.312 | 2.8   | 0.276 | 2.64 | 0.026 | -1.17 | 0.324 |
| 1418303_at   | RIKEN cDNA 1700113O17 gene                                               | 1700113O17Rik       | 1.08  | 0.485 | 1.18  | 0.730 | 1.2   | 0.837 | 2.65 | 0.009 | -1.18 | 0.429 |
| 1455807_at   | testis-specific protein, Y-encoded-like 5                                | Tspyl5              | -1.1  | 0.433 | 1.39  | 0.643 | 1.75  | 0.902 | 2.65 | 0.045 | 3.18  | 0.013 |
| 1443386_at   | expressed sequence C86727                                                | C86727              | -1.43 | 0.245 | -1.63 | 0.317 | 2.01  | 0.388 | 2.66 | 0.000 | 1.12  | 0.398 |
| 1446994_at   | Exosome component 2                                                      | Exosc2              | -1.32 | 0.252 | 1.75  | 0.987 | 1.15  | 0.565 | 2.67 | 0.037 | 2.21  | 0.944 |
| 1453800_at   | RIKEN cDNA 2500002L14 gene                                               | 2500002L14Rik       | 1.46  | 0.861 | 1.79  | 0.744 | -1.16 | 0.582 | 2.7  | 0.008 | 1.06  | 0.895 |
| 1447659_x_at | ATPase, H+ transporting, lysosomal V1 subunit H                          | Atp6v1h             | 4.03  | 0.133 | 2.27  | 0.260 | -1.63 | 0.118 | 2.7  | 0.024 | -1.36 | 0.361 |
| 1459077_at   | Cytochrome P450, family 2, subfamily d, polypeptide 26                   | Cyp2d26             | 1.94  | 0.519 | 1.79  | 0.254 | 1.12  | 0.912 | 2.7  | 0.040 | 1.43  | 0.498 |
| 1441668_at   | RIKEN cDNA E130107B13 gene                                               | E130107B13Rik       | 2.47  | 0.685 | 2.08  | 0.965 | 2.41  | 0.172 | 2.7  | 0.027 | 1.67  | 0.197 |
| 1432724_at   | RIKEN cDNA 4930445G23 gene                                               | 4930445G23Rik       | 1.78  | 0.459 | 3.22  | 0.851 | 1.28  | 0.929 | 2.71 | 0.003 | 1.21  | 0.784 |
| 1453252_at   | dihydrouridine synthase 4-like (S. cerevisiae)                           | Dus4l               | 1.73  | 0.033 | 2.08  | 0.005 | 1.44  | 0.627 | 2.72 | 0.013 | 1.27  | 0.260 |
| 1447326_s_at | zinc finger, MYM-type 3                                                  | Zmym3               | 1.57  | 0.428 | 2.28  | 0.580 | 2.63  | 0.197 | 2.72 | 0.024 | 1.55  | 0.513 |
| 1447116_at   | Presenilin associated, rhomboid-like                                     | Parl                | -2.33 | 0.073 | 2.06  | 0.027 | 1.98  | 0.684 | 2.74 | 0.019 | 1.85  | 0.763 |
| 1454399_at   | RIKEN cDNA 2010003H20 gene                                               | 2010003H20Rik       | 1.14  | 0.543 | -1.73 | 0.178 | 1.03  | 0.990 | 2.75 | 0.007 | -1.06 | 0.872 |
| 1446514_at   | Dipeptidylpeptidase 10                                                   | Dpp10               | 1.62  | 0.718 | -1.37 | 0.275 | 1.5   | 0.685 | 2.77 | 0.047 | 2.2   | 0.554 |
| 1436410_at   | expressed sequence AI449023 /// gene model 941, (NCBI)                   | AI449023 /// Gm941  | 1.56  | 0.876 | 1.63  | 0.935 | -1.11 | 0.856 | 2.78 | 0.016 | 1.91  | 0.405 |
| 1419827_s_at | kinesin family member 17                                                 | Kif17               | 1.27  | 0.961 | 2.13  | 0.508 | 1.15  | 0.690 | 2.78 | 0.044 | 1.44  | 0.574 |
| 1458144_at   | CDNA sequence BC031353                                                   | BC031353            | -1.35 | 0.423 | 1.53  | 0.499 | 1.52  | 0.506 | 2.79 | 0.024 | 1.78  | 0.079 |
| 1453845_at   | RIKEN cDNA 4733401D01 gene                                               | 4733401D01Rik       | -1.35 | 0.142 | -1.66 | 0.187 | 1.66  | 0.356 | 2.81 | 0.047 | -1.05 | 0.556 |
| 1430721_at   | RIKEN cDNA 4931431C16 gene                                               | 4931431C16Rik       | 1.49  | 0.716 | 1.24  | 0.858 | 1.05  | 0.587 | 2.82 | 0.016 | 1.16  | 0.175 |
| 1441843_s_at | RIKEN cDNA 5230400M03 gene                                               | 5230400M03Rik       | 1.32  | 0.995 | 1.21  | 0.630 | 1.14  | 0.877 | 2.82 | 0.043 | 1.68  | 0.726 |
| 1425973_at   | lysosomal trafficking regulator                                          | Lyst                | 1.15  | 0.764 | -1.46 | 0.112 | -1.38 | 0.265 | 2.82 | 0.018 | -1.72 | 0.110 |
| 1441120_at   | CEA-related cell adhesion molecule 16                                    | Ceacam16            | 2.26  | 0.934 | 2.64  | 0.700 | 2.72  | 0.324 | 2.83 | 0.038 | -1.28 | 0.431 |
| 1445743_at   | RIKEN cDNA E330024J20 gene                                               | E330024J20Rik       | -1.17 | 0.531 | -1.02 | 0.808 | 1.56  | 0.736 | 2.85 | 0.002 | 2.03  | 0.106 |
| 1446279_at   | Neuronal growth regulator 1                                              | Negr1               | -1.34 | 0.151 | -1.22 | 0.391 | 2.1   | 0.283 | 2.85 | 0.007 | 3.1   | 0.028 |
| 1436476_at   | DAN domain family, member 5                                              | Dand5               | 1.09  | 0.475 | 1.29  | 0.759 | 1.03  | 0.578 | 2.86 | 0.023 | -1.38 | 0.341 |
| 1453280_at   | melanoma antigen, family B, 5 /// similar to Melanoma-associated antigen | Mageb5 /// LOC6297  | -1.31 | 0.198 | -1.18 | 0.288 | -1.72 | 0.010 | 2.86 | 0.042 | -1.03 | 0.804 |
| 1456010_x_at | hairy and enhancer of split 5 (Drosophila)                               | Hes5                | 3.31  | 0.100 | 2.51  | 0.020 | 1.1   | 0.679 | 2.87 | 0.015 | 1.21  | 0.883 |
| 1439333_at   | potassium channel, subfamily V, member 1                                 | Kcnv1               | -2.68 | 0.007 | -2.55 | 0.014 | 1.56  | 0.926 | 2.87 | 0.001 | 1.21  | 0.921 |
| 1445068_at   | mucosa associated lymphoid tissue lymphoma translocation gene 1          | Malt1               | 1.03  | 0.536 | 1.68  | 0.612 | 1.33  | 0.413 | 2.87 | 0.047 | -1.02 | 0.619 |
| 1456720_at   | RIKEN cDNA 1500041B16 gene                                               | 1500041B16Rik       | -1.5  | 0.291 | 1.15  | 0.463 | -1.07 | 0.574 | 2.88 | 0.039 | 1.39  | 0.428 |
| 1440917_at   | RIKEN cDNA 2900093K20 gene                                               | 2900093K20Rik       | 2.7   | 0.215 | 3.14  | 0.138 | 2.3   | 0.524 | 2.88 | 0.022 | 1.09  | 0.796 |
| 1441837_at   | cholinergic receptor, nicotinic, beta polypeptide 2 (neuronal)           | Chrb2               | 3.08  | 0.588 | 1.47  | 0.443 | 2.26  | 0.109 | 2.88 | 0.040 | 1.73  | 0.223 |
| 1435585_at   | transcription elongation factor A (SII)-like 7                           | Tceal7              | 1.92  | 0.432 | 4.49  | 0.455 | 1.24  | 0.854 | 2.88 | 0.011 | 1.4   | 0.455 |
| 1453190_at   | ubiquitin specific peptidase 19                                          | Usp19               | -2.1  | 0.109 | -1.22 | 0.343 | 1.68  | 0.246 | 2.9  | 0.014 | 1.44  | 0.357 |
| 1459568_at   | Transmembrane and tetratricopeptide repeat containing 4                  | Tmtc4               | 1.54  | 0.905 | 1.61  | 0.909 | 1.49  | 0.706 | 2.91 | 0.006 | 1.07  | 0.798 |
| 1453041_at   | Trp53 inducible protein 5                                                | Trp53i5             | 1.36  | 0.983 | 1.44  | 0.412 | -1.07 | 0.428 | 2.91 | 0.008 | 2.16  | 0.572 |
| 1448906_at   | cadherin 16                                                              | Cdh16               | 1.02  | 0.755 | 1.93  | 0.405 | -1.02 | 0.479 | 2.94 | 0.042 | -1.75 | 0.116 |
| 1445594_at   | Heterogeneous nuclear ribonucleoprotein L                                | Hnrpl               | -1.3  | 0.225 | 1.47  | 0.915 | 1.22  | 0.880 | 2.96 | 0.012 | -1.29 | 0.161 |
| 1453699_at   | RIKEN cDNA 4930448D08 gene                                               | 4930448D08Rik       | 1.71  | 0.318 | 1.54  | 0.662 | -1.32 | 0.187 | 2.98 | 0.030 | 1.74  | 0.873 |
| 1438274_at   | zinc finger protein, subfamily 1A, 4 (Eos)                               | Zfp1a4              | -1.85 | 0.134 | -1.47 | 0.178 | 1.55  | 0.922 | 2.98 | 0.021 | 1.11  | 0.511 |
| 1448930_at   | RIKEN cDNA 3010026O09 gene                                               | 3010026O09Rik       | 2.66  | 0.173 | 3.97  | 0.065 | 1.16  | 0.637 | 2.99 | 0.008 | 1.85  | 0.088 |
| 1458116_at   | RIKEN cDNA 9530079D04 gene                                               | 9530079D04Rik       | -1.68 | 0.024 | 1.06  | 0.673 | -1.51 | 0.076 | 2.99 | 0.039 | -1.61 | 0.176 |
| 1430084_at   | TLC domain containing 1                                                  | Tlcd1               | 2.02  | 0.345 | 1.22  | 0.914 | 1.4   | 0.180 | 3.01 | 0.037 | 3.89  | 0.052 |
| 1459988_at   | methyl-CpG binding domain protein 3-like 2                               | Mbd3l2              | 2.45  | 0.911 | 2.31  | 0.979 | 1.93  | 0.992 | 3.02 | 0.000 | -1.34 | 0.104 |

|              |                                                                           |                    |       |       |       |       |       |       |      |       |       |       |
|--------------|---------------------------------------------------------------------------|--------------------|-------|-------|-------|-------|-------|-------|------|-------|-------|-------|
| 1450725_s_at | carbonic anhydrase 14                                                     | Car14              | 2.37  | 0.701 | 1.74  | 0.595 | 1.34  | 0.986 | 3.04 | 0.026 | 1.68  | 0.276 |
| 1431152_at   | hyaluronan and proteoglycan link protein 3                                | Hapln3             | -1.36 | 0.328 | -1.46 | 0.110 | 1.32  | 0.693 | 3.05 | 0.007 | 1.25  | 0.593 |
| 1432975_at   | RIKEN cDNA 2310038E17 gene                                                | 2310038E17Rik      | 2.71  | 0.453 | 1.22  | 0.746 | -1.07 | 0.496 | 3.07 | 0.002 | -1.28 | 0.543 |
| 1457837_at   | cDNA sequence BC033606 /// similar to phospholipase B                     | BC033606 /// LOC6t | 1.24  | 0.759 | -1.02 | 0.583 | 1.87  | 0.964 | 3.08 | 0.007 | -1.03 | 0.404 |
| 1457290_at   | mab-21-like 1 (C. elegans)                                                | Mab21l1            | -1.29 | 0.313 | 1.98  | 0.856 | 1.6   | 0.784 | 3.09 | 0.008 | 1.98  | 0.291 |
| 1432643_at   | RIKEN cDNA 4933411E06 gene                                                | 4933411E06Rik      | -1.48 | 0.085 | 1.26  | 0.409 | 1.08  | 0.424 | 3.11 | 0.044 | 1.16  | 0.891 |
| 1446096_at   | RIKEN cDNA 2310001H17 gene                                                | 2310001H17Rik      | -1.14 | 0.506 | -1.98 | 0.045 | 1.46  | 0.784 | 3.12 | 0.020 | -1.15 | 0.210 |
| 1426603_at   | ribonuclease L (2', 5'-oligoadenylate synthetase-dependent)               | Rnasel             | 2.5   | 0.056 | 2.04  | 0.505 | 2.16  | 0.540 | 3.13 | 0.012 | 1.27  | 0.788 |
| 1454094_at   | RIKEN cDNA 4930471E19 gene                                                | 4930471E19Rik      | 1.13  | 0.400 | 1.07  | 0.545 | -1.17 | 0.396 | 3.14 | 0.005 | 2.15  | 0.119 |
| 1440804_at   | natural killer tumor recognition sequence                                 | Nktr               | 1.35  | 0.805 | 1.5   | 0.841 | 1.04  | 0.529 | 3.14 | 0.030 | 2.09  | 0.127 |
| 1436686_at   | zinc finger protein 706                                                   | Zfp706             | 1.81  | 0.639 | 1.62  | 0.664 | 1.4   | 0.943 | 3.14 | 0.044 | 2.91  | 0.404 |
| 1445131_at   | F-box and leucine-rich repeat protein 13                                  | Fbxl13             | 1.35  | 0.552 | -1.14 | 0.371 | 1.05  | 0.818 | 3.15 | 0.037 | 1.45  | 0.735 |
| 1453790_at   | RIKEN cDNA 5730403B10 gene                                                | 5730403B10Rik      | -1.2  | 0.372 | 1.02  | 0.606 | 1.75  | 0.182 | 3.19 | 0.003 | 1.04  | 0.856 |
| 1442384_at   | G elongation factor, mitochondrial 2                                      | Gfm2               | -1.22 | 0.474 | -1.14 | 0.516 | -1.26 | 0.444 | 3.22 | 0.015 | 1.03  | 0.702 |
| 1456836_at   | IL2-inducible T-cell kinase                                               | Itk                | 1.52  | 0.800 | 1.96  | 0.842 | -1.08 | 0.546 | 3.22 | 0.042 | 1.33  | 0.253 |
| 1444114_at   | Muskelin 1, intracellular mediator containing kelch motifs                | Mkln1              | -1.02 | 0.716 | -1.14 | 0.584 | 1.86  | 0.695 | 3.22 | 0.001 | 1.22  | 0.656 |
| 1439595_at   | RIKEN cDNA A430107P09 gene                                                | A430107P09Rik      | 1.22  | 0.838 | 1.39  | 0.526 | 1.34  | 0.421 | 3.25 | 0.049 | 1.4   | 0.892 |
| 1453357_at   | tudor domain containing 9                                                 | Tdrd9              | 2.26  | 0.441 | -1.22 | 0.541 | 1.43  | 0.205 | 3.25 | 0.034 | -1.23 | 0.321 |
| 1440542_at   | RIKEN cDNA 7420416P09 gene                                                | 7420416P09Rik      | 1.83  | 0.131 | 1.23  | 0.153 | 1.1   | 0.901 | 3.26 | 0.011 | -2.07 | 0.018 |
| 1432950_at   | RIKEN cDNA 5330421F21 gene                                                | 5330421F21Rik      | -1.37 | 0.356 | -1.61 | 0.233 | -1.26 | 0.284 | 3.32 | 0.032 | 2.09  | 0.636 |
| 1454176_at   | excision repaiross-complementing rodent repair deficiency, complement     | Ercc8              | 1.55  | 0.597 | 2.15  | 0.141 | -1.62 | 0.185 | 3.34 | 0.022 | 1.04  | 0.959 |
| 1417765_a_at | amylase 1, salivary                                                       | Amy1               | -1.56 | 0.053 | -2.67 | 0.073 | 1.31  | 0.926 | 3.38 | 0.000 | 1.02  | 0.663 |
| 1441760_at   | similar to 40S ribosomal protein S25 /// similar to 40S ribosomal protein | LOC243302 /// LOC  | 1.02  | 0.644 | -1.07 | 0.487 | -1.12 | 0.656 | 3.38 | 0.049 | -1.98 | 0.124 |
| 1441521_at   | Calcium channel, voltage-dependent, beta 2 subunit                        | Cacnb2             | 1.16  | 0.828 | 1.31  | 0.929 | 1.28  | 0.191 | 3.43 | 0.050 | -1.02 | 0.611 |
| 1448409_at   | lymphoid-restricted membrane protein                                      | Lrmp               | 1.27  | 0.597 | 1.62  | 0.749 | 1.04  | 0.635 | 3.44 | 0.038 | -1.2  | 0.295 |
| 1449919_at   | keratin associated protein 6-2                                            | Krtap6-2           | 1.79  | 0.662 | 2.15  | 0.833 | -1.2  | 0.545 | 3.45 | 0.009 | -1.34 | 0.163 |
| 1438311_at   | RIKEN cDNA 2010002M12 gene                                                | 2010002M12Rik      | 1.13  | 0.775 | 1.47  | 0.670 | 1.57  | 0.190 | 3.47 | 0.018 | 1.47  | 0.382 |
| 1440126_at   | cDNA sequence BC037704                                                    | BC037704           | -1.17 | 0.363 | 1.56  | 0.382 | -1.13 | 0.449 | 3.51 | 0.009 | 2.22  | 0.641 |
| 1424098_at   | ELOVL family member 7, elongation of long chain fatty acids (yeast)       | Elov17             | -2.64 | 0.059 | -2.28 | 0.073 | 1.88  | 0.164 | 3.53 | 0.018 | -1.65 | 0.176 |
| 1439006_x_at | RIKEN cDNA 6430550H21 gene                                                | 6430550H21Rik      | 2.66  | 0.445 | 2.41  | 0.123 | 1.3   | 0.536 | 3.56 | 0.016 | 1.24  | 0.659 |
| 1433222_at   | RIKEN cDNA 2610311E24 gene                                                | 2610311E24Rik      | -1.14 | 0.528 | 2.06  | 0.362 | 2.37  | 0.111 | 3.57 | 0.030 | -1.7  | 0.171 |
| 1432415_at   | RAB3C, member RAS oncogene family                                         | Rab3c              | 2.73  | 0.171 | 2.08  | 0.462 | 1.22  | 0.628 | 3.62 | 0.004 | 2.11  | 0.227 |
| 1433178_at   | RIKEN cDNA 4933427C19 gene                                                | 4933427C19Rik      | 1.65  | 0.967 | 1.3   | 0.858 | 1.15  | 0.771 | 3.65 | 0.002 | 1.72  | 0.577 |
| 1421280_at   | gamma-aminobutyric acid (GABA-A) receptor, subunit alpha 1                | Gabra1             | -1.45 | 0.037 | 1.65  | 0.813 | 1.66  | 0.247 | 3.74 | 0.007 | -1.16 | 0.395 |
| 1459926_at   | expressed sequence C77068                                                 | C77068             | 2.41  | 0.658 | 1.64  | 0.856 | 1.78  | 0.477 | 3.75 | 0.023 | 1.26  | 0.604 |
| 1439712_at   | integrator complex subunit 10                                             | Ints10             | 2.77  | 0.588 | 2.61  | 0.790 | -1.14 | 0.477 | 3.78 | 0.016 | -1.4  | 0.179 |
| 1429718_at   | SLIT and NTRK-like family, member 5                                       | Slitrk5            | 1.39  | 0.995 | 1.31  | 0.892 | 1.49  | 0.851 | 3.93 | 0.040 | 2.35  | 0.367 |
| 1435408_at   | RIKEN cDNA 2700092H06 gene                                                | 2700092H06Rik      | -1.21 | 0.525 | -1.48 | 0.233 | 2.35  | 0.105 | 3.95 | 0.042 | 1.39  | 0.167 |
| 1447567_at   | RIKEN cDNA D130007H15 gene                                                | D130007H15Rik      | 1.5   | 0.824 | -1.54 | 0.243 | 1.02  | 0.670 | 3.97 | 0.001 | 1.59  | 0.903 |
| 1459966_at   | Oxysterol binding protein-like 7                                          | Osbp17             | 1.05  | 0.831 | 2.7   | 0.408 | 1.14  | 0.964 | 4.03 | 0.023 | 1.23  | 0.671 |
| 1437310_at   | Bardet-Biedl syndrome 1 homolog (human)                                   | Bbs1               | 1.74  | 0.323 | 1.23  | 0.403 | 2.44  | 0.036 | 4.06 | 0.034 | 1.35  | 0.575 |
| 1449767_x_at | synaptotagmin VI                                                          | Syt6               | -1.22 | 0.471 | 1.06  | 0.719 | 1.14  | 0.660 | 4.29 | 0.007 | 1.13  | 0.361 |
| 1419140_at   | activin receptor IIB                                                      | Acvr2b             | 1.46  | 0.980 | 1.53  | 0.759 | 1.12  | 0.519 | 4.53 | 0.034 | -1    | 0.782 |
| 1455347_at   | regulator of telomere elongation helicase 1                               | Rtel1              | 6     | 0.837 | 1.49  | 0.408 | 4.35  | 0.797 | 5.78 | 0.002 | 2.4   | 0.072 |
| 1452552_at   | neoplastic progression 2                                                  | Npn2               | 2.01  | 0.566 | 11.69 | 0.000 | 3.34  | 0.102 | 7.33 | 0.002 | 3.96  | 0.024 |

**Supplementary table 5. List of significant expression profiles of DKO cells irradiated with 0.6J/m2 of UV (gray color) as compared to non-irradiated DKO cells**

| code         | Gene Title                                                       | Symbol        | WT_0.6J/m2 | p     | WT_4J/m2 | p     | XPA_0.6J/m2 | p     | CSB_0.6J/m2 | p     | DKO_0.6J/m2 | p     |
|--------------|------------------------------------------------------------------|---------------|------------|-------|----------|-------|-------------|-------|-------------|-------|-------------|-------|
| 1437371_at   | RIKEN cDNA 9930021J17 gene                                       | 9930021J17Rik | 1.26       | 0.940 | 1.44     | 0.868 | -1.82       | 0.104 | -1.46       | 0.243 | -5.82       | 0.003 |
| 1450836_at   | neurogenin 1                                                     | Neurog1       | 2.62       | 0.053 | 1.56     | 0.046 | -1.25       | 0.336 | 1.79        | 0.610 | -5.02       | 0.028 |
| 1438861_at   | basonuclin 2                                                     | Bnc2          | -1.43      | 0.148 | -8.88    | 0.007 | -2.42       | 0.029 | -3.5        | 0.001 | -4.02       | 0.002 |
| 1455040_s_at | RIKEN cDNA 1110062M06 gene                                       | 1110062M06Rik | 1.03       | 0.783 | -2.18    | 0.062 | -1.6        | 0.065 | 1.24        | 0.887 | -3.95       | 0.013 |
| 1427564_at   | diaphanous homolog 2 (Drosophila)                                | Diap2         | -1.62      | 0.060 | -4.29    | 0.032 | -2.65       | 0.025 | -1.57       | 0.072 | -3.92       | 0.023 |
| 1445111_at   | Exocyst complex component 4                                      | Exoc4         | 1.17       | 0.601 | 1.68     | 0.232 | 1.1         | 0.847 | -1.94       | 0.045 | -3.64       | 0.045 |
| 1437897_at   | kelch-like 21 (Drosophila)                                       | Klhl21        | -2.03      | 0.111 | -2.48    | 0.069 | 1.12        | 0.921 | 1.73        | 0.917 | -3.61       | 0.010 |
| 1446698_at   | Mortality factor 4 like 1                                        | Morf4l1       | 1.65       | 0.350 | -3.52    | 0.093 | -1.85       | 0.105 | -1.99       | 0.089 | -3.6        | 0.037 |
| 1442435_at   | Smg-6 homolog, nonsense mediated mRNA decay factor               | Smg6          | -1.26      | 0.340 | -1.5     | 0.284 | -1.29       | 0.209 | 2.31        | 0.310 | -3.55       | 0.034 |
| 1417435_at   | like-glycosyltransferase                                         | Large         | -1.14      | 0.255 | -4.38    | 0.003 | -2.64       | 0.009 | -2.16       | 0.002 | -3.49       | 0.001 |
| 1436765_at   | par-3 (partitioning defective 3) homolog (C. elegans)            | Pard3         | 3.12       | 0.674 | -1.6     | 0.101 | -1.75       | 0.064 | -1.96       | 0.006 | -3.48       | 0.003 |
| 1416302_at   | early B-cell factor 1                                            | Ebf1          | 2.21       | 0.743 | -1.95    | 0.072 | -3.29       | 0.002 | -3.45       | 0.000 | -3.44       | 0.006 |
| 1445695_at   | Ataxin 1                                                         | Atxn1         | 1.04       | 0.451 | -1.33    | 0.239 | -1.31       | 0.210 | -1.11       | 0.634 | -3.33       | 0.029 |
| 1443373_at   | Mitogen-activated protein kinase kinase kinase 5                 | Map4k5        | 1.29       | 0.692 | 2.82     | 0.076 | 1.11        | 0.737 | 1.44        | 0.837 | -3.31       | 0.012 |
| 1444740_at   | RIKEN cDNA 4930550L11 gene                                       | 4930550L11Rik | -1.07      | 0.283 | -1.57    | 0.153 | -1.11       | 0.307 | 2.25        | 0.820 | -3.27       | 0.021 |
| 1437010_a_at | ornithine decarboxylase antizyme 3                               | Oaz3          | 1.31       | 0.466 | 1.26     | 0.652 | 2.04        | 0.095 | -1.03       | 0.619 | -3.26       | 0.007 |
| 1455358_at   | Ataxin 2 binding protein 1                                       | Atx2bp1       | 1.24       | 0.723 | -1.44    | 0.255 | -1.52       | 0.196 | -1.9        | 0.030 | -3.22       | 0.007 |
| 1445991_at   | Lipoma HMGIC fusion partner                                      | Lhfp          | 2.9        | 0.251 | 1.48     | 0.827 | -1.17       | 0.416 | 1.97        | 0.977 | -3.15       | 0.006 |
| 1428204_at   | RIKEN cDNA C030002O17 gene                                       | C030002O17Rik | 1.14       | 0.998 | 1.29     | 0.945 | -1.11       | 0.480 | 1.2         | 0.987 | -3.14       | 0.036 |
| 1449794_x_at | Cathepsin F                                                      | Ctsf          | -1.28      | 0.336 | -1.03    | 0.445 | 1.16        | 0.295 | -3.58       | 0.050 | -3.13       | 0.036 |
| 1452050_at   | calcium/calmodulin-dependent protein kinase ID                   | Camk1d        | -2.14      | 0.028 | -5.47    | 0.022 | -1.24       | 0.338 | -2.13       | 0.093 | -3.12       | 0.002 |
| 1453443_at   | RIKEN cDNA 1110015O18 gene                                       | 1110015O18Rik | 1.99       | 0.372 | -1.17    | 0.460 | 1.19        | 0.676 | 3.58        | 0.083 | -3.07       | 0.044 |
| 1443229_at   | ATPase family, AAA domain containing 2                           | Atad2         | 1.31       | 0.849 | 2.97     | 0.094 | 1.71        | 0.587 | 3.27        | 0.100 | -3.02       | 0.030 |
| 1458513_at   | mitogen activated protein kinase 10                              | Mapk10        | 1.68       | 0.540 | -1.41    | 0.090 | 1.71        | 0.620 | 1.45        | 0.889 | -3.02       | 0.008 |
| 1444964_at   | casein kinase 1, gamma 1                                         | Csnk1g1       | -1.12      | 0.633 | 1.06     | 0.625 | -1.66       | 0.051 | -1.23       | 0.225 | -2.97       | 0.022 |
| 1459349_at   | RIKEN cDNA A930011G23 gene                                       | A930011G23Rik | 1.52       | 0.967 | 1.94     | 0.671 | 1.03        | 0.759 | 1.29        | 0.800 | -2.95       | 0.032 |
| 1449594_at   | ATP-binding cassette, sub-family B (MDR/TAP), member 1B          | Abcb1b        | 1.19       | 0.837 | 2.36     | 0.160 | 1.22        | 0.566 | 1.3         | 0.791 | -2.95       | 0.011 |
| 1434582_at   | DNA segment, Chr 14, ERATO Doi 171, expressed                    | D14Erttd171e  | -2.2       | 0.031 | -3.44    | 0.041 | -2.08       | 0.048 | -1.68       | 0.048 | -2.95       | 0.032 |
| 1427514_at   | hypothetical protein LOC624295                                   | LOC624295     | 1.66       | 0.767 | -1.02    | 0.469 | 1.29        | 0.773 | -1.21       | 0.394 | -2.94       | 0.010 |
| 1438350_at   | G protein-coupled receptor 64                                    | Gpr64         | 3.38       | 0.167 | 3.1      | 0.025 | 1.68        | 0.224 | -1.25       | 0.187 | -2.88       | 0.031 |
| 1456423_at   | methyl-CpG binding domain protein 5                              | Mbd5          | -1.34      | 0.162 | -6.08    | 0.005 | -2.29       | 0.026 | -2.69       | 0.001 | -2.88       | 0.005 |
| 1454546_at   | RIKEN cDNA 4933403L11 gene                                       | 4933403L11Rik | 1.69       | 0.695 | 1.16     | 0.587 | -1.34       | 0.403 | -1.82       | 0.002 | -2.86       | 0.004 |
| 1424625_a_at | DENN/MADD domain containing 1A                                   | Dennd1a       | -1.06      | 0.474 | -2.94    | 0.002 | -1.95       | 0.016 | -2.58       | 0.012 | -2.85       | 0.032 |
| 1442086_at   | Metastasis associated 3                                          | Mta3          | -1.26      | 0.316 | 1.57     | 0.296 | 1.52        | 0.742 | 1.85        | 0.252 | -2.83       | 0.012 |
| 1460509_at   | UDP-Gal:betaGlcNAc beta 1,3-galactosyltransferase, polypeptide 1 | B3galt1       | 1.24       | 0.904 | 1.72     | 0.579 | -1.72       | 0.159 | 1.15        | 0.694 | -2.82       | 0.005 |
| 1459372_at   | neuronal PAS domain protein 4                                    | Npas4         | 1.76       | 0.147 | 1.24     | 0.963 | -1.57       | 0.038 | -1.01       | 0.762 | -2.81       | 0.016 |
| 1452342_at   | amyloid beta (A4) precursor protein-binding, family B, member 2  | Apbb2         | -1.24      | 0.242 | -4.81    | 0.045 | -2.12       | 0.007 | -2.59       | 0.000 | -2.8        | 0.010 |
| 1433301_at   | RIKEN cDNA 4930478M09 gene                                       | 4930478M09Rik | 1.56       | 0.251 | -1.07    | 0.006 | -1.14       | 0.624 | -1.3        | 0.199 | -2.78       | 0.007 |
| 1438531_at   | RIKEN cDNA A730054J21 gene                                       | A730054J21Rik | -1.34      | 0.080 | -3.96    | 0.006 | -2.15       | 0.001 | -2.14       | 0.003 | -2.72       | 0.004 |
| 1431653_at   | T-cell receptor beta, joining region                             | Tcrb-J        | 1.18       | 0.686 | 1.96     | 0.652 | -1.5        | 0.152 | 1.09        | 0.786 | -2.72       | 0.003 |
| 1452783_at   | fibronectin type III domain containing 3B                        | Fndc3b        | 1.16       | 0.796 | -1.44    | 0.119 | -2.16       | 0.005 | -2.1        | 0.000 | -2.71       | 0.002 |
| 1444538_at   | Expressed sequence AL033314                                      | AL033314      | -1.39      | 0.242 | -1.91    | 0.160 | -2.67       | 0.059 | -1.49       | 0.126 | -2.69       | 0.006 |
| 1443654_at   | Ankyrin repeat and FYVE domain containing 1                      | Ankfy1        | 1.37       | 0.615 | -1.05    | 0.386 | -1.42       | 0.245 | -1.13       | 0.227 | -2.68       | 0.017 |
| 1457524_at   | Transcription factor 12                                          | Tcf12         | 1.28       | 0.802 | 1.83     | 0.774 | -1.24       | 0.542 | 1.5         | 0.570 | -2.68       | 0.012 |
| 1429417_at   | RIKEN cDNA 4833446K15 gene                                       | 4833446K15Rik | -1.34      | 0.062 | -4.38    | 0.016 | -1.62       | 0.080 | -2.05       | 0.003 | -2.67       | 0.001 |
| 1438449_at   | Cdc42 binding protein kinase alpha                               | Cdc42bpa      | -1.04      | 0.699 | -1.38    | 0.325 | 1.35        | 0.177 | -1.15       | 0.527 | -2.67       | 0.007 |
| 1430439_at   | multiple C2 domains, transmembrane 1                             | Mctp1         | 1.87       | 0.340 | 2.08     | 0.360 | 1.51        | 0.552 | 1.37        | 0.914 | -2.67       | 0.004 |
| 1442437_at   | PTK2 protein tyrosine kinase 2 beta                              | Ptk2b         | 1.51       | 0.858 | 2.06     | 0.107 | -1.45       | 0.098 | -1.58       | 0.264 | -2.67       | 0.033 |
| 1438828_at   | Rap guanine nucleotide exchange factor (GEF) 6                   | Rapgef6       | 2.43       | 0.775 | 1.19     | 0.410 | -1.19       | 0.463 | 1.25        | 0.774 | -2.66       | 0.029 |
| 1449314_at   | zinc finger protein, multitype 2                                 | Zfp2          | -1.07      | 0.482 | -8.16    | 0.005 | -2.11       | 0.007 | -2.19       | 0.002 | -2.66       | 0.026 |
| 1458298_at   | Ca<2+>dependent activator protein for secretion                  | Cadps         | 2.57       | 0.078 | 3.06     | 0.104 | 2.01        | 0.387 | 3.84        | 0.199 | -2.65       | 0.049 |
| 1448152_at   | insulin-like growth factor 2                                     | Igf2          | -1.16      | 0.520 | 1.34     | 0.891 | -1.42       | 0.119 | 3.08        | 0.123 | -2.65       | 0.008 |
| 1423439_at   | phosphoenolpyruvate carboxykinase 1, cytosolic                   | Pck1          | -1.08      | 0.393 | -1.79    | 0.296 | 1.85        | 0.199 | 1.28        | 0.975 | -2.65       | 0.004 |

|              |                                                                    |               |       |       |       |       |       |       |       |       |       |       |
|--------------|--------------------------------------------------------------------|---------------|-------|-------|-------|-------|-------|-------|-------|-------|-------|-------|
| 1430408_at   | calcium channel, voltage-dependent, P/Q type, alpha 1A subunit     | Cacna1a       | 1.65  | 0.364 | 1.44  | 0.712 | 1.79  | 0.129 | 1.11  | 0.670 | -2.64 | 0.013 |
| 1436778_at   | cytochrome b-245, beta polypeptide                                 | Cybb          | 1.97  | 0.779 | 1.56  | 0.827 | -1.29 | 0.193 | -1.13 | 0.502 | -2.64 | 0.004 |
| 1427421_at   | t-complex protein 10b                                              | Tcp10b        | 1.04  | 0.961 | -1.08 | 0.271 | 1.24  | 0.007 | -1.32 | 0.182 | -2.64 | 0.005 |
| 1443989_at   | tripartite motif protein 9                                         | Trim9         | 1.05  | 0.883 | -1.03 | 0.364 | -2.3  | 0.076 | -1.18 | 0.335 | -2.64 | 0.007 |
| 1437135_at   | F-box and WD-40 domain protein 10                                  | Fbxw10        | 1.07  | 0.569 | 1.02  | 0.468 | 1.28  | 0.659 | 1.01  | 0.770 | -2.62 | 0.038 |
| 1434685_at   | DNA segment, Chr 3, Brigham & Women's Genetics 0562 expressed      | D3Bwg0562e    | 2.42  | 0.481 | -1.02 | 0.535 | 2.5   | 0.621 | 2.85  | 0.405 | -2.6  | 0.010 |
| 1457876_at   | DNA segment, Chr 9, ERATO Doi 496, expressed                       | D9Etd496e     | 1.48  | 0.379 | -1.01 | 0.761 | -1.02 | 0.605 | 1.8   | 0.438 | -2.6  | 0.021 |
| 1422392_at   | vomeronasal 1 receptor, C6                                         | V1rc6         | 1.22  | 0.694 | 1.34  | 0.694 | 2.87  | 0.039 | 1.91  | 0.512 | -2.59 | 0.003 |
| 1450945_at   | protein kinase C, alpha                                            | Prkca         | 1.16  | 0.926 | -2.39 | 0.042 | -2.09 | 0.001 | -2.13 | 0.001 | -2.58 | 0.005 |
| 1434878_at   | SLIT and NTRK-like family, member 4                                | Slitrk4       | 1.76  | 0.036 | -1.88 | 0.025 | 2.16  | 0.897 | 1.87  | 0.331 | -2.58 | 0.033 |
| 1426027_a_at | Rho GTPase activating protein 10                                   | Arhgap10      | 4.61  | 0.736 | 1.98  | 0.336 | -1.54 | 0.114 | -1.9  | 0.000 | -2.56 | 0.012 |
| 1440246_at   | longevity assurance homolog 6 (S. cerevisiae)                      | Lass6         | 1.35  | 0.638 | -1.49 | 0.154 | 1.08  | 0.837 | -1.08 | 0.283 | -2.56 | 0.020 |
| 1432019_at   | TruB pseudouridine (psi) synthase homolog 1 (E. coli)              | Trub1         | -1.6  | 0.139 | 1.11  | 0.980 | 1.89  | 0.230 | 1.67  | 0.591 | -2.56 | 0.003 |
| 1449763_at   | Doublesex and mab-3 related transcription factor 3                 | Dmrt3         | -1.01 | 0.670 | -1.92 | 0.033 | 1.44  | 0.929 | -1.82 | 0.126 | -2.54 | 0.030 |
| 1436515_at   | RIKEN cDNA E030004N02 gene                                         | E030004N02Rik | -1.01 | 0.682 | -5.74 | 0.001 | -1.46 | 0.218 | -2.17 | 0.026 | -2.54 | 0.032 |
| 1439397_at   | formin 1                                                           | Fmn1          | -1.32 | 0.348 | -4.27 | 0.117 | -1.6  | 0.001 | -2.56 | 0.002 | -2.54 | 0.000 |
| 1431203_at   | serologically defined colon cancer antigen 8                       | Sdccag8       | 1.85  | 0.269 | 1.23  | 0.267 | -1.32 | 0.308 | -1.07 | 0.406 | -2.53 | 0.003 |
| 1450278_at   | tachykinin receptor 3                                              | Tacr3         | 1.7   | 0.260 | 1.76  | 0.261 | 1.14  | 0.754 | 2.32  | 0.365 | -2.53 | 0.013 |
| 1452860_at   | F-box and leucine-rich repeat protein 17                           | Fbxl17        | -1.28 | 0.074 | -4.57 | 0.011 | -1.87 | 0.000 | -2.24 | 0.002 | -2.52 | 0.000 |
| 1424953_at   | cDNA sequence BC021614                                             | BC021614      | 1.26  | 0.589 | 2.08  | 0.250 | -1.02 | 0.326 | -1.91 | 0.087 | -2.51 | 0.012 |
| 1429138_at   | neuronal PAS domain protein 3                                      | Npas3         | 1.03  | 0.485 | 1.89  | 0.861 | 1.63  | 0.637 | 1.04  | 0.995 | -2.51 | 0.010 |
| 1430632_at   | ankyrin repeat and SOCS box-containing protein 1                   | Asb1          | 3.77  | 0.538 | 1.45  | 0.427 | 1.48  | 0.767 | 1.65  | 0.554 | -2.5  | 0.041 |
| 1440969_at   | cDNA sequence BC030308                                             | BC030308      | 1.1   | 0.748 | 1.56  | 0.872 | 1.18  | 0.969 | 1.5   | 0.458 | -2.49 | 0.011 |
| 1445359_at   | adenylate cyclase 1                                                | Adcy1         | 1.85  | 0.946 | 2.21  | 0.966 | 1.45  | 0.298 | 1.61  | 0.965 | -2.48 | 0.022 |
| 1440645_at   | similar to deleted in malignant brain tumors 1 isoform c precursor | LOC546006     | 2.29  | 0.046 | 4.08  | 0.018 | 2.49  | 0.340 | -1.05 | 0.328 | -2.48 | 0.015 |
| 1416043_at   | nuclear autoantigenic sperm protein (histone-binding)              | Nasp          | 1.29  | 0.351 | 1.75  | 0.158 | 1     | 0.502 | 1.31  | 0.956 | -2.48 | 0.022 |
| 1458591_at   | RAS and EF hand domain containing                                  | Rasef         | 1.36  | 0.627 | -1    | 0.440 | 1.04  | 0.616 | 2     | 0.032 | -2.48 | 0.046 |
| 1451567_a_at | interferon activated gene 203                                      | Ifi203        | -1.16 | 0.374 | 1.55  | 0.605 | 2.44  | 0.463 | -1.25 | 0.505 | -2.47 | 0.019 |
| 1437422_at   | semaphorin 5A                                                      | Sema5a        | 1.06  | 0.756 | -1.14 | 0.448 | -2.96 | 0.072 | -2.18 | 0.068 | -2.47 | 0.044 |
| 1454127_at   | RIKEN cDNA 1010001108 gene                                         | 1010001108Rik | -1.79 | 0.140 | 1     | 0.351 | -1.79 | 0.227 | 1.33  | 0.873 | -2.46 | 0.002 |
| 1433165_at   | RIKEN cDNA 4930570E01 gene                                         | 4930570E01Rik | 1.54  | 0.961 | 1.96  | 0.468 | 1.04  | 0.849 | -1.33 | 0.331 | -2.46 | 0.004 |
| 1437393_at   | expressed sequence A1875142                                        | A1875142      | -1.31 | 0.125 | -3.91 | 0.004 | -2.18 | 0.001 | -2.12 | 0.006 | -2.46 | 0.005 |
| 1457548_at   | A disintegrin-like and metallopeptidase with thrombospondin type 1 | Adams6        | -1.11 | 0.473 | -2.14 | 0.092 | -1.69 | 0.107 | -1.72 | 0.011 | -2.45 | 0.007 |
| 1426442_at   | glycoprotein m6a                                                   | Gpm6a         | 3.56  | 0.327 | -1.5  | 0.306 | 1.17  | 0.603 | 1.57  | 0.944 | -2.45 | 0.002 |
| 1436611_at   | solute carrier family 39 (zinc transporter), member 12             | Slc39a12      | 1.2   | 0.909 | 3.48  | 0.232 | 1.18  | 0.551 | -1.3  | 0.327 | -2.45 | 0.039 |
| 1438619_x_at | zinc finger, DHHC domain containing 14                             | Zdhhc14       | -1.47 | 0.288 | -5.73 | 0.136 | -1.7  | 0.068 | -2.57 | 0.001 | -2.45 | 0.026 |
| 1429987_at   | RIKEN cDNA 9930013L23 gene                                         | 9930013L23Rik | -1.29 | 0.007 | -3.17 | 0.004 | -2.03 | 0.006 | -1.74 | 0.000 | -2.44 | 0.008 |
| 1436047_at   | gene model 672, (NCBI)                                             | Gm672         | -1.12 | 0.226 | -2.63 | 0.015 | -1.69 | 0.000 | -2.21 | 0.001 | -2.44 | 0.000 |
| 1417318_at   | deleted in bladder cancer 1 (human)                                | Dbc1          | -1.37 | 0.141 | -3.6  | 0.020 | -1.99 | 0.004 | -1.84 | 0.008 | -2.43 | 0.006 |
| 1442320_at   | hypothetical LOC553096                                             | LOC553096     | 1.02  | 0.546 | -1.03 | 0.516 | 1.04  | 0.683 | 1.31  | 0.194 | -2.42 | 0.002 |
| 1442693_at   | similar to tripartite motif protein TRIM5                          | LOC667823     | 1.84  | 0.618 | 1.55  | 0.873 | 1.26  | 0.572 | 1.32  | 0.051 | -2.42 | 0.031 |
| 1453512_at   | RIKEN cDNA 5830407P18 gene                                         | 5830407P18Rik | 1.19  | 0.430 | -1.14 | 0.529 | -1.65 | 0.049 | -1.33 | 0.247 | -2.41 | 0.013 |
| 1417730_at   | exostoses (multiple) 1                                             | Ext1          | 1.33  | 0.686 | -1.75 | 0.098 | -2.36 | 0.002 | -2.41 | 0.001 | -2.41 | 0.013 |
| 1427687_at   | protocadherin alpha 10                                             | Pcdha10       | -1.93 | 0.087 | 1.52  | 0.470 | 2.08  | 0.772 | 2.11  | 0.304 | -2.41 | 0.030 |
| 1460384_a_at | AT rich interactive domain 4B (Rbp1 like)                          | Arid4b        | 1.38  | 0.070 | 1.17  | 0.899 | 1.03  | 0.852 | -1.38 | 0.164 | -2.39 | 0.005 |
| 1436737_a_at | sorbin and SH3 domain containing 1                                 | Sorbs1        | -1.33 | 0.230 | -2.35 | 0.052 | -1.86 | 0.006 | -2.22 | 0.000 | -2.38 | 0.005 |
| 1430994_at   | membrane-associated ring finger (C3HC4) 5                          | 5-Mar         | 1.03  | 0.641 | -1.59 | 0.085 | -1.2  | 0.159 | -1.42 | 0.212 | -2.37 | 0.040 |
| 1418173_at   | keratin 25                                                         | Krt25         | -1.25 | 0.426 | 1.65  | 0.325 | 1.38  | 0.547 | 1.35  | 0.782 | -2.37 | 0.032 |
| 1451577_at   | zinc finger and BTB domain containing 20                           | Zbtb20        | 1.12  | 0.362 | -2.11 | 0.005 | -1.74 | 0.009 | -1.59 | 0.040 | -2.37 | 0.001 |
| 1451333_a_at | proacrosin binding protein                                         | Acrbp         | 1.4   | 0.717 | 1.16  | 0.423 | 2.75  | 0.138 | 1.06  | 0.550 | -2.36 | 0.004 |
| 1457629_at   | cDNA sequence BC060631                                             | BC060631      | 2.05  | 0.639 | 2.34  | 0.459 | 1.16  | 0.674 | 1.36  | 0.340 | -2.35 | 0.022 |
| 1450768_at   | discs, large homolog 1 (Drosophila)                                | Dlgh1         | 1.22  | 0.982 | -1.55 | 0.096 | -1.77 | 0.007 | -1.68 | 0.005 | -2.35 | 0.001 |
| 1420455_at   | glial cells missing homolog 2 (Drosophila)                         | Gcm2          | -1.24 | 0.133 | 1.13  | 0.321 | -1.29 | 0.252 | 2.6   | 0.708 | -2.35 | 0.008 |
| 1444386_at   | phosphodiesterase 1C                                               | Pde1c         | 2.52  | 0.122 | 2.08  | 0.443 | -1.88 | 0.057 | -1.22 | 0.424 | -2.35 | 0.009 |
| 1434880_at   | ets variant gene 6 (TEL oncogene)                                  | Etv6          | 1.08  | 0.579 | -1.4  | 0.093 | -1.66 | 0.003 | -1.93 | 0.003 | -2.34 | 0.001 |
| 1457236_at   | G protein-coupled receptor 62                                      | Gpr62         | -1.45 | 0.218 | 2.11  | 0.693 | 1.38  | 0.822 | -1.43 | 0.188 | -2.34 | 0.041 |
| 1447566_at   | Histone deacetylase 4                                              | Hdac4         | 2.13  | 0.817 | -1.04 | 0.229 | 1.18  | 0.547 | -1.02 | 0.724 | -2.34 | 0.031 |
| 1443809_at   | Pleiotrophin                                                       | Ptn           | 1.7   | 0.985 | 1.36  | 0.894 | 1.08  | 0.802 | -1.2  | 0.332 | -2.34 | 0.015 |



|              |                                                                            |                  |       |       |       |       |       |       |       |       |       |       |
|--------------|----------------------------------------------------------------------------|------------------|-------|-------|-------|-------|-------|-------|-------|-------|-------|-------|
| 1422261_a_at | mutS homolog 3 (E. coli)                                                   | Msh3             | -1.39 | 0.131 | -1.25 | 0.279 | 1.36  | 0.382 | 1.29  | 0.079 | -2.33 | 0.031 |
| 1440703_at   | RIKEN cDNA 2810429I04 gene                                                 | 2810429I04Rik    | 1.34  | 0.427 | -1.71 | 0.006 | 1.23  | 0.768 | -1.6  | 0.173 | -2.32 | 0.033 |
| 1436369_at   | RIKEN cDNA 2900076A07 gene                                                 | 2900076A07Rik    | 1.53  | 0.824 | -1.51 | 0.139 | 1.65  | 0.990 | 1.84  | 0.930 | -2.32 | 0.023 |
| 1453893_at   | RIKEN cDNA 4933412O06 gene                                                 | 4933412O06Rik    | 1.56  | 0.861 | -1.13 | 0.312 | 1.94  | 0.267 | 2.63  | 0.102 | -2.32 | 0.049 |
| 1429229_s_at | RIKEN cDNA 4930534B04 gene                                                 | 4930534B04Rik    | -1.21 | 0.524 | -2    | 0.005 | 1.65  | 0.810 | -1.14 | 0.387 | -2.31 | 0.002 |
| 1457463_at   | Down syndrome cell adhesion molecule-like 1                                | Dscaml1          | -1.72 | 0.202 | 1.03  | 0.430 | 1.85  | 0.243 | -1.58 | 0.150 | -2.31 | 0.001 |
| 1441620_at   | Growth factor receptor bound protein 10                                    | Grb10            | 1.97  | 0.061 | 1.13  | 0.957 | -1.4  | 0.235 | -1.26 | 0.345 | -2.31 | 0.029 |
| 1450284_at   | phosphodiesterase 3A, cGMP inhibited                                       | Pde3a            | 2.84  | 0.875 | 1.44  | 0.373 | 1.26  | 0.726 | -1.71 | 0.159 | -2.31 | 0.038 |
| 1429939_at   | SAPS domain family, member 3                                               | Saps3            | -1.31 | 0.261 | -1.19 | 0.409 | 1.01  | 0.999 | -1.31 | 0.181 | -2.31 | 0.008 |
| 1454711_at   | triple functional domain (PTPRF interacting)                               | Trio             | 1.12  | 0.560 | -1.51 | 0.126 | -1.68 | 0.005 | -2.53 | 0.002 | -2.31 | 0.001 |
| 1450558_at   | vomeronasal 1 receptor, A1                                                 | V1ra1            | 1.26  | 0.891 | 1.43  | 0.972 | 2.64  | 0.368 | 1.16  | 0.556 | -2.31 | 0.042 |
| 1457821_at   | RIKEN cDNA 2610511M17 gene                                                 | 2610511M17Rik    | 1.82  | 0.593 | 1.7   | 0.912 | -1.18 | 0.336 | -2.02 | 0.093 | -2.3  | 0.017 |
| 1447709_at   | Erythrocyte protein band 4.1-like 3                                        | Epb4.1l3         | 2.1   | 0.125 | 3.07  | 0.077 | -1.33 | 0.296 | 1.1   | 0.797 | -2.3  | 0.008 |
| 1444828_at   | Protein phosphatase 2, regulatory subunit B (B56), gamma isoform           | Ppp2r5c          | 2.06  | 0.120 | 1.52  | 0.615 | -1.22 | 0.266 | 1.62  | 0.675 | -2.3  | 0.031 |
| 1458450_at   | zinc finger RNA binding protein                                            | Zfr              | 2.42  | 0.329 | 1.62  | 0.809 | 1.12  | 0.610 | -1.16 | 0.327 | -2.3  | 0.027 |
| 1440317_at   | RIKEN cDNA C130068B02 gene                                                 | C130068B02Rik    | 1.02  | 0.602 | -1.13 | 0.252 | -1.24 | 0.181 | -1.37 | 0.107 | -2.29 | 0.044 |
| 1455256_at   | TRAF2 and NCK interacting kinase                                           | Tnik // LOC66511 | -1.48 | 0.160 | -3.74 | 0.050 | -1.76 | 0.160 | -3.01 | 0.002 | -2.29 | 0.029 |
| 1459491_at   | DNA segment, Chr 12, ERATO Doi 673, expressed                              | D12Erttd673e     | -2.06 | 0.019 | 1.02  | 0.944 | -1.17 | 0.354 | 1.55  | 0.221 | -2.28 | 0.038 |
| 1452222_at   | utrophin                                                                   | Utrn             | -1.22 | 0.149 | -2.52 | 0.017 | -1.94 | 0.006 | -1.74 | 0.003 | -2.28 | 0.007 |
| 1427716_at   | RIKEN cDNA 1700036D21 gene                                                 | 1700036D21Rik    | 1.47  | 0.432 | 1.95  | 0.285 | -1.17 | 0.296 | -1.37 | 0.148 | -2.27 | 0.005 |
| 1422541_at   | protein tyrosine phosphatase, receptor type, M                             | Ptpm             | -1.47 | 0.055 | -3.24 | 0.022 | -1.9  | 0.005 | -1.86 | 0.004 | -2.27 | 0.004 |
| 1435930_at   | zinc finger protein 291                                                    | Zfp291           | -1.82 | 0.225 | -3.26 | 0.140 | -1.53 | 0.005 | -1.9  | 0.019 | -2.27 | 0.016 |
| 1420801_at   | neuronal PAS domain protein 1                                              | Npas1            | 1.01  | 0.567 | 1.16  | 0.730 | -1.1  | 0.423 | -1.23 | 0.355 | -2.26 | 0.045 |
| 1440762_at   | synapsin II                                                                | Syn2             | 1.98  | 0.573 | 1.61  | 0.963 | -1.14 | 0.817 | 1.39  | 0.097 | -2.26 | 0.048 |
| 1440209_at   | membrane-associated ring finger (C3HC4) 1                                  | 1-Mar            | 1.32  | 0.360 | 1.06  | 0.646 | -1.08 | 0.674 | 1.54  | 0.488 | -2.25 | 0.011 |
| 1458452_at   | ankyrin repeat domain 11                                                   | Ankrd11          | -1.08 | 0.604 | -1.59 | 0.081 | -1.45 | 0.022 | -1.22 | 0.261 | -2.25 | 0.012 |
| 1446227_at   | G protein-coupled receptor 180                                             | Gpr180           | 1.47  | 0.904 | 1.43  | 0.754 | 2.39  | 0.126 | -1.04 | 0.601 | -2.25 | 0.029 |
| 1440568_at   | protection of telomeres 1                                                  | Pot1             | 2.27  | 0.170 | 1.69  | 0.589 | 1.45  | 0.684 | -1.31 | 0.331 | -2.25 | 0.005 |
| 1445866_at   | microtubule associated serine/threonine kinase family member 4             | Mast4            | 1.02  | 0.901 | -1.14 | 0.275 | -1.68 | 0.046 | -1.24 | 0.167 | -2.24 | 0.007 |
| 1434571_at   | vacuolar protein sorting 13B                                               | Vps13b // LOC666 | -1.03 | 0.556 | -2.27 | 0.040 | -1.87 | 0.009 | -2.07 | 0.001 | -2.24 | 0.019 |
| 1442623_at   | LysM, putative peptidoglycan-binding, domain containing 4                  | Lysmd4           | 1.22  | 0.924 | -1.19 | 0.339 | 1.04  | 0.673 | 1.71  | 0.728 | -2.23 | 0.009 |
| 1438433_at   | WAS protein homology region 2 domain containing 1                          | Whdc1            | 1.36  | 0.675 | 2.3   | 0.461 | 2.53  | 0.513 | -1.06 | 0.512 | -2.23 | 0.028 |
| 1459998_at   | zinc finger protein 407                                                    | Zfp407           | 1.05  | 0.681 | -3.13 | 0.001 | -1.74 | 0.002 | -2.18 | 0.004 | -2.23 | 0.012 |
| 1417574_at   | chemokine (C-X-C motif) ligand 12                                          | Cxcl12           | -1.29 | 0.129 | -1.64 | 0.093 | -1.06 | 0.689 | -1.14 | 0.712 | -2.22 | 0.044 |
| 1452251_at   | neurobeachin                                                               | Nbea             | -1.44 | 0.152 | -2.77 | 0.058 | -1.57 | 0.024 | -1.65 | 0.017 | -2.22 | 0.014 |
| 1446240_at   | Kinesin 2                                                                  | Kns2             | 1.52  | 0.956 | 1.11  | 0.624 | -1.37 | 0.296 | 1.85  | 0.889 | -2.21 | 0.017 |
| 1453116_at   | zinc finger protein 689                                                    | Zfp689           | 1.54  | 0.040 | 1.33  | 0.254 | -1.27 | 0.404 | 1.14  | 0.773 | -2.21 | 0.031 |
| 1430975_at   | RIKEN cDNA 8430416G17 gene                                                 | 8430416G17Rik    | 1     | 0.660 | -1.71 | 0.205 | 1.1   | 0.883 | 1.14  | 0.974 | -2.2  | 0.033 |
| 1445821_at   | Interleukin 1 receptor accessory protein-like 1                            | Il1rap1          | 2.92  | 0.565 | 2.81  | 0.464 | 1.54  | 0.727 | 2.01  | 0.642 | -2.2  | 0.018 |
| 1437602_at   | similar to Hypothetical protein MGC26988                                   | RP23-273O7.4     | -1.22 | 0.363 | -1.39 | 0.387 | -1.54 | 0.017 | 1.93  | 0.558 | -2.19 | 0.028 |
| 1445416_at   | Testis specific gene A14                                                   | Tsga14           | 1.42  | 0.374 | 2.48  | 0.298 | 1.55  | 0.540 | 2.43  | 0.314 | -2.19 | 0.046 |
| 1452343_at   | DNA segment, Chr 18, ERATO Doi 653, expressed                              | D18Erttd653e     | 1.21  | 0.888 | -1.57 | 0.124 | -1.75 | 0.006 | -2.07 | 0.045 | -2.18 | 0.002 |
| 1452762_at   | RIKEN cDNA 8430436O14 gene                                                 | 8430436O14Rik    | -1.6  | 0.141 | -3.44 | 0.061 | -2.18 | 0.007 | -1.79 | 0.002 | -2.17 | 0.036 |
| 1459948_at   | Growth hormone receptor                                                    | Ghr              | 2.27  | 0.314 | 1.74  | 0.466 | 1.14  | 0.736 | 1.9   | 0.889 | -2.17 | 0.046 |
| 1419249_at   | PFTAIRE protein kinase 1                                                   | Pftk1            | 1.03  | 0.439 | -2.55 | 0.043 | -1.68 | 0.003 | -1.76 | 0.007 | -2.17 | 0.015 |
| 1455204_at   | phosphatidylinositol transfer protein, cytoplasmic 1                       | Pitpnc1          | -1.07 | 0.436 | -3.71 | 0.010 | -1.77 | 0.040 | -2.02 | 0.012 | -2.17 | 0.007 |
| 1456230_at   | RIKEN cDNA 4933422H20 gene                                                 | 4933422H20Rik    | 1.44  | 0.900 | 1.41  | 0.789 | -1.06 | 0.620 | -1.15 | 0.163 | -2.16 | 0.003 |
| 1441851_x_at | lymphocyte antigen 6 complex, locus G6C                                    | Ly6g6c           | 2.32  | 0.431 | 1.7   | 0.799 | 1.67  | 0.382 | 1.09  | 0.883 | -2.16 | 0.033 |
| 1425383_a_at | pre B-cell leukemia transcription factor 1 // region containing RIKEN cDNA | Pbx1 // LOC67687 | -1.12 | 0.389 | -2.01 | 0.066 | -1.32 | 0.059 | -1.62 | 0.010 | -2.16 | 0.000 |
| 1446974_at   | phosphatidylinositol-3-phosphate/phosphatidylinositol 5-kinase, type III   | Pip5k3           | 2.21  | 0.125 | 2.35  | 0.309 | 1.9   | 0.395 | -2.01 | 0.097 | -2.16 | 0.002 |
| 1423278_at   | protein tyrosine phosphatase, receptor type, K                             | Ptpk             | -1.49 | 0.031 | -2.67 | 0.015 | -2.26 | 0.030 | -2.01 | 0.007 | -2.16 | 0.014 |
| 1437788_at   | trans-acting transcription factor 6                                        | Sp6              | -1.1  | 0.456 | 2.43  | 0.131 | 1.72  | 0.193 | 1.43  | 0.871 | -2.16 | 0.048 |
| 1444062_at   | RIKEN cDNA 2900056L01 gene                                                 | 2900056L01Rik    | -1.07 | 0.354 | -2.97 | 0.136 | 1.44  | 0.263 | -1.87 | 0.056 | -2.15 | 0.033 |
| 1460006_at   | AT motif binding factor 1                                                  | Atbf1            | -1.14 | 0.107 | -1.9  | 0.002 | -1.76 | 0.002 | -1.99 | 0.000 | -2.15 | 0.002 |
| 1440232_at   | similar to KIAA1913 // similar to KIAA1913                                 | LOC622645 // LOI | -1.04 | 0.609 | 1.84  | 0.069 | 2.79  | 0.238 | 1.17  | 0.891 | -2.15 | 0.022 |
| 1423953_at   | CDK5 regulatory subunit associated protein 1-like 1                        | Cdkal1           | -1.2  | 0.092 | -2.66 | 0.005 | -1.95 | 0.005 | -1.74 | 0.017 | -2.14 | 0.019 |
| 1459457_at   | calcium/calmodulin-dependent protein kinase II, delta                      | Camk2d           | 1.01  | 0.580 | -1.39 | 0.296 | -1.51 | 0.027 | -1.43 | 0.048 | -2.13 | 0.014 |
| 1438301_at   | Development and differentiation enhancing                                  | Ddef1            | 1.23  | 0.350 | 1.17  | 0.994 | -1.95 | 0.077 | -1.33 | 0.173 | -2.13 | 0.034 |

|              |                                                                              |                          |       |       |       |       |       |       |       |       |       |       |
|--------------|------------------------------------------------------------------------------|--------------------------|-------|-------|-------|-------|-------|-------|-------|-------|-------|-------|
| 1456220_at   | F-box and leucine-rich repeat protein 7                                      | Fbxl7                    | 1     | 0.539 | -6.34 | 0.021 | -1.82 | 0.043 | -2.23 | 0.000 | -2.13 | 0.005 |
| 1428643_at   | mannoside acetylglucosaminyltransferase 5                                    | Mgat5                    | -1.35 | 0.080 | -2.8  | 0.007 | -1.41 | 0.061 | -1.57 | 0.005 | -2.13 | 0.025 |
| 1440489_at   | BTB (POZ) domain containing 4                                                | Btbtd4                   | 1.34  | 0.939 | 1.22  | 0.932 | 1.07  | 0.963 | -1.2  | 0.196 | -2.12 | 0.037 |
| 1426412_at   | neurogenic differentiation 1                                                 | Neurod1                  | 2.23  | 0.471 | 3.34  | 0.006 | -2.09 | 0.004 | 1.26  | 0.839 | -2.11 | 0.049 |
| 1449520_at   | tetratricopeptide repeat domain 28                                           | Ttc28                    | -1.28 | 0.065 | -2.61 | 0.020 | -1.74 | 0.010 | -1.92 | 0.002 | -2.11 | 0.036 |
| 1448765_at   | Fyn proto-oncogene                                                           | Fyn                      | -1.15 | 0.180 | -2.22 | 0.004 | -1.66 | 0.007 | -1.92 | 0.000 | -2.1  | 0.002 |
| 1447651_x_at | mitochondrial ribosomal protein L30 /// similar to mitochondrial ribosomal p | Mrpl30 /// LOC621        | 1.02  | 0.693 | 1.33  | 0.591 | -1.11 | 0.725 | 1.2   | 0.175 | -2.1  | 0.047 |
| 1426994_at   | PH domain and leucine rich repeat protein phosphatase                        | Phlpp                    | 1.01  | 0.795 | -2.06 | 0.019 | -1.62 | 0.001 | -1.88 | 0.000 | -2.1  | 0.001 |
| 1447135_at   | Protein tyrosine phosphatase, receptor type, T                               | Ptptr                    | -1.25 | 0.338 | 1.17  | 0.807 | -1.32 | 0.522 | -1.19 | 0.314 | -2.1  | 0.027 |
| 1452014_a_at | insulin-like growth factor 1                                                 | Igf1                     | 1.45  | 0.482 | 1.53  | 0.793 | 1.33  | 0.411 | -1.05 | 0.765 | -2.09 | 0.036 |
| 1456997_at   | Nuclear receptor coactivator 5                                               | Ncoa5                    | 1.11  | 0.697 | -1.08 | 0.362 | 1.2   | 0.403 | 1.45  | 0.277 | -2.09 | 0.003 |
| 1451497_at   | casein kinase 1, alpha 1                                                     | Cskn1a1                  | -1.12 | 0.304 | 1.5   | 0.269 | 1.68  | 0.863 | -1.08 | 0.420 | -2.08 | 0.017 |
| 1417901_a_at | islet cell autoantigen 1                                                     | Ica1                     | 1.23  | 0.591 | -1.72 | 0.121 | 1.6   | 0.605 | 1.43  | 0.906 | -2.08 | 0.045 |
| 1436356_at   | lectin, galactose binding, soluble 7                                         | Lgals7                   | 1.06  | 0.633 | -1.74 | 0.003 | -1.83 | 0.004 | -1.72 | 0.001 | -2.08 | 0.013 |
| 1453905_at   | RIKEN cDNA 5033415L01 gene                                                   | RIKEN cDNA 5033415L01Rik | 1.09  | 0.780 | -1.34 | 0.303 | -1.18 | 0.164 | -1.12 | 0.342 | -2.07 | 0.034 |
| 1440542_at   | RIKEN cDNA 7420416P09 gene                                                   | 7420416P09Rik            | 1.83  | 0.131 | 1.23  | 0.153 | 1.1   | 0.901 | 3.26  | 0.011 | -2.07 | 0.018 |
| 1440990_at   | cDNA sequence BC056349                                                       | BC056349                 | -1.84 | 0.199 | -4.12 | 0.094 | -1.94 | 0.002 | -2.52 | 0.009 | -2.07 | 0.013 |
| 1451648_a_at | folate receptor 2 (fetal)                                                    | Folr2                    | 1.19  | 0.968 | 1.32  | 0.107 | -1.18 | 0.517 | -1.21 | 0.397 | -2.07 | 0.014 |
| 1450823_at   | OG9 homeobox gene                                                            | Og9x                     | -1.43 | 0.459 | 1.07  | 0.596 | -2.45 | 0.000 | 1.71  | 0.919 | -2.07 | 0.022 |
| 1424221_at   | sushi domain containing 4                                                    | Susd4                    | 1.21  | 0.738 | -1.04 | 0.884 | -1.36 | 0.199 | 2.29  | 0.192 | -2.07 | 0.012 |
| 1438451_at   | Rho GTPase-activating protein                                                | Grit                     | -1.11 | 0.393 | -2.11 | 0.035 | -1.54 | 0.034 | -1.78 | 0.004 | -2.06 | 0.013 |
| 1434804_at   | SEC15-like 2 (S. cerevisiae)                                                 | Sec15l2                  | -1.23 | 0.223 | -3.11 | 0.051 | -1.76 | 0.009 | -1.92 | 0.002 | -2.06 | 0.002 |
| 1436513_at   | tetratricopeptide repeat, ankyrin repeat and coiled-coil containing 2        | Tanc2                    | -1.2  | 0.128 | -5.67 | 0.022 | -1.44 | 0.082 | -1.61 | 0.098 | -2.06 | 0.005 |
| 1446426_at   | Enabled homolog (Drosophila)                                                 | Enah                     | 1.19  | 0.330 | -1.17 | 0.231 | -1.34 | 0.149 | -1.14 | 0.249 | -2.05 | 0.013 |
| 1454593_at   | FYVE, RhoGEF and PH domain containing 3                                      | Fgd3                     | -1.17 | 0.487 | -1.18 | 0.407 | 1.86  | 0.184 | 1.17  | 0.975 | -2.05 | 0.029 |
| 1453583_at   | zinc finger, ZZ-type with EF hand domain 1                                   | Zzef1                    | -1.22 | 0.282 | -1.33 | 0.313 | -1.37 | 0.066 | -1.67 | 0.001 | -2.05 | 0.028 |
| 1432308_at   | RIKEN cDNA 1700058C13 gene                                                   | RIKEN cDNA 1700058C13Rik | -1.15 | 0.192 | 1.54  | 0.794 | 1.81  | 0.437 | 1.43  | 0.563 | -2.04 | 0.006 |
| 1440993_at   | Expressed sequence AW111846                                                  | AW111846                 | -1.2  | 0.406 | -1.58 | 0.274 | 1.08  | 0.009 | -1.01 | 0.792 | -2.04 | 0.046 |
| 1445900_at   | Kalirin, RhoGEF kinase                                                       | Kalrn                    | 1.11  | 0.422 | 1.07  | 0.876 | -1.06 | 0.518 | -1.7  | 0.007 | -2.04 | 0.024 |
| 1451893_s_at | membrane associated guanylate kinase, WW and PDZ domain containing           | Magi1                    | -1.72 | 0.219 | -4.1  | 0.103 | -1.16 | 0.197 | -2.92 | 0.005 | -2.04 | 0.005 |
| 1424588_at   | SLIT-ROBO Rho GTPase activating protein 3                                    | Srgap3                   | -1.21 | 0.287 | -3.26 | 0.022 | -1.62 | 0.011 | -1.92 | 0.002 | -2.04 | 0.022 |
| 1434603_at   | thyroid hormone receptor associated protein 2                                | Thrap2                   | 1.03  | 0.170 | -1.49 | 0.000 | -1.55 | 0.024 | -1.64 | 0.014 | -2.04 | 0.025 |
| 1454185_at   | RIKEN cDNA 4933436E23 gene                                                   | 4933436E23Rik            | 2.24  | 0.339 | 1.42  | 0.311 | 1.87  | 0.885 | 1.37  | 0.950 | -2.03 | 0.034 |
| 1455979_at   | AT rich interactive domain 1B (Swi1 like)                                    | Arid1b                   | -1.36 | 0.229 | -3.04 | 0.030 | -1.49 | 0.017 | -2.25 | 0.001 | -2.03 | 0.009 |
| 1451279_at   | ELKS/RAB6-interacting/CAST family member 1                                   | Erc1                     | -1.21 | 0.161 | -2.67 | 0.006 | -1.54 | 0.012 | -1.96 | 0.011 | -2.03 | 0.004 |
| 1455803_at   | solute carrier organic anion transporter family, member 4a1                  | Slco4a1                  | -1.16 | 0.232 | 1.27  | 0.638 | -1.09 | 0.614 | 1.09  | 0.693 | -2.03 | 0.018 |
| 1423776_s_at | TBC1 domain family, member 22a                                               | Tbc1d22a                 | -1.19 | 0.292 | -2.65 | 0.057 | -1.3  | 0.138 | -1.34 | 0.012 | -2.03 | 0.001 |
| 1441050_at   | Striatin, calmodulin binding protein 3                                       | Strn3                    | 1.66  | 0.400 | 1.61  | 0.456 | -1.08 | 0.485 | 1.23  | 0.487 | -2.02 | 0.046 |
| 1440581_at   | RIKEN cDNA A530088H08 gene                                                   | A530088H08Rik            | -1.92 | 0.135 | -1.75 | 0.115 | 3.47  | 0.139 | 1.01  | 0.726 | -2.01 | 0.046 |
| 1426605_at   | BRCA1/BRCA2-containing complex, subunit 3                                    | Brc3                     | -1    | 0.627 | -1.24 | 0.053 | 2.04  | 0.474 | -1.02 | 0.785 | -2.01 | 0.025 |
| 1430911_at   | DNA segment, Chr 19, ERATO Doi 652, expressed                                | D19Ert652e               | -1.15 | 0.751 | -1.01 | 0.490 | 1.28  | 0.794 | 1.51  | 0.317 | -2.01 | 0.040 |
| 1431354_a_at | phenylalanine-tRNA synthetase 2 (mitochondrial)                              | Fars2                    | 1.04  | 0.699 | -2.29 | 0.027 | -1.51 | 0.022 | -1.48 | 0.030 | -2.01 | 0.002 |
| 1456022_at   | homeodomain interacting protein kinase 2                                     | Hipk2                    | 1.01  | 0.934 | -1.81 | 0.048 | -1.76 | 0.024 | -1.99 | 0.001 | -2.01 | 0.024 |
| 1449378_at   | keratin 27                                                                   | Krt27                    | 1.59  | 0.333 | 2.39  | 0.207 | -1.42 | 0.231 | 1.68  | 0.390 | -2.01 | 0.048 |
| 1434286_at   | trichorhinophalangeal syndrome I (human)                                     | Trps1                    | 1.21  | 0.279 | -1.78 | 0.021 | -1.37 | 0.130 | -1.43 | 0.048 | -2.01 | 0.028 |
| 1439211_at   | uromodulin-like 1                                                            | Umodl1                   | 2.49  | 0.126 | 1.89  | 0.161 | -1.13 | 0.714 | 1.5   | 0.590 | -2.01 | 0.028 |
| 1443203_at   | Zinc finger homeobox 1a                                                      | Zfhx1a                   | 1.75  | 0.386 | 1     | 0.743 | 2.12  | 0.806 | 3.08  | 0.421 | -2.01 | 0.042 |
| 1430973_at   | zinc finger protein 558                                                      | Zfp558                   | -1.16 | 0.434 | 1.07  | 0.799 | 1.43  | 0.995 | 1.39  | 0.369 | -2.01 | 0.014 |
| 1439129_at   | RIKEN cDNA 1110060D06 gene /// dedicator of cytokinesis 5                    | 1110060D06Rik ///        | 1.14  | 0.981 | -1.62 | 0.077 | -1.36 | 0.040 | -1.61 | 0.013 | -1.99 | 0.014 |
| 1432126_at   | RIKEN cDNA 1700072H12 gene                                                   | 1700072H12Rik            | 1.32  | 0.889 | 1.08  | 0.449 | -1.01 | 0.775 | -1.16 | 0.529 | -1.99 | 0.049 |
| 1429064_at   | DIP2 disco-interacting protein 2 homolog C (Drosophila)                      | Dip2c                    | -1.44 | 0.104 | -3.12 | 0.032 | -1.41 | 0.002 | -1.55 | 0.004 | -1.99 | 0.008 |
| 1441898_at   | RIKEN cDNA E530011F12 gene                                                   | E530011F12Rik            | 1.09  | 0.981 | -1.11 | 0.662 | 1.39  | 0.644 | 1.06  | 0.939 | -1.99 | 0.025 |
| 1450781_at   | high mobility group AT-hook 2                                                | Hmga2                    | 1.1   | 0.952 | -1.72 | 0.056 | -1.85 | 0.000 | -1.66 | 0.007 | -1.99 | 0.003 |
| 1455314_at   | LIM domain containing preferred translocation partner in lipoma              | Lpp                      | -1.14 | 0.045 | -1.94 | 0.001 | -1.66 | 0.004 | -1.55 | 0.000 | -1.99 | 0.009 |
| 1459453_at   | Roundabout homolog 1 (Drosophila)                                            | Robo1                    | 1.77  | 0.487 | 1.71  | 0.436 | -1.02 | 0.445 | -1.03 | 0.835 | -1.99 | 0.011 |
| 1431485_at   | RIKEN cDNA 4833447115 gene                                                   | 4833447115Rik            | 1.49  | 0.931 | -1.54 | 0.175 | -1.13 | 0.217 | 1.07  | 0.930 | -1.98 | 0.012 |
| 1432725_at   | RIKEN cDNA 4930445G23 gene                                                   | 4930445G23Rik            | -1.06 | 0.513 | -1.11 | 0.468 | 1.55  | 0.495 | 1.45  | 0.078 | -1.98 | 0.046 |
| 1429284_at   | RIKEN cDNA 8430436F23 gene                                                   | 8430436F23Rik            | 1.16  | 0.698 | -1.13 | 0.609 | -1.2  | 0.186 | 1.8   | 0.700 | -1.98 | 0.007 |

|              |                                                                              |                   |       |       |       |       |       |       |       |       |       |       |
|--------------|------------------------------------------------------------------------------|-------------------|-------|-------|-------|-------|-------|-------|-------|-------|-------|-------|
| 1440614_at   | Rho GTPase activating protein 23                                             | Arhgap23          | -1.03 | 0.676 | 1.05  | 0.917 | 1.14  | 0.907 | -1.02 | 0.367 | -1.98 | 0.028 |
| 1439757_s_at | Eph receptor A4                                                              | Epha4             | -1.3  | 0.342 | -1.44 | 0.263 | -1.03 | 0.566 | -1.42 | 0.117 | -1.98 | 0.013 |
| 1436910_at   | RAS protein activator like 2                                                 | Rasal2            | 1.04  | 0.327 | -2.91 | 0.068 | -1.78 | 0.017 | -1.88 | 0.001 | -1.98 | 0.002 |
| 1441596_at   | RIKEN cDNA 5730601F06 gene                                                   | 5730601F06Rik     | -1.11 | 0.387 | 1.78  | 0.379 | 1.25  | 0.775 | 1.75  | 0.581 | -1.97 | 0.036 |
| 1437640_at   | RIKEN cDNA 6430704M03 gene                                                   | 6430704M03Rik     | -1.32 | 0.300 | 1.1   | 0.746 | 2.53  | 0.242 | 1.45  | 0.947 | -1.97 | 0.036 |
| 1455082_at   | Casitas B-lineage lymphoma b                                                 | Cblb              | -1.07 | 0.213 | -1.69 | 0.007 | -1.41 | 0.018 | -1.48 | 0.044 | -1.97 | 0.041 |
| 1435432_at   | centaurin, gamma 2                                                           | Centg2            | -1.23 | 0.014 | -2.53 | 0.001 | -1.91 | 0.009 | -1.57 | 0.005 | -1.97 | 0.018 |
| 1418948_at   | fascin homolog 3, actin-bundling protein, testicular (Strongylocentrotus pur | Fscn3             | -1.85 | 0.007 | -1.07 | 0.540 | 1.14  | 0.612 | -1.27 | 0.089 | -1.97 | 0.040 |
| 1419108_at   | oligophrenin 1                                                               | Ophn1             | -1.08 | 0.508 | -1.58 | 0.032 | -1.44 | 0.080 | -1.14 | 0.238 | -1.97 | 0.031 |
| 1447980_s_at | RUN and TBC1 domain containing 2                                             | Rutbc2            | -1.43 | 0.137 | -1.33 | 0.351 | 1.36  | 0.493 | 1.08  | 0.893 | -1.97 | 0.013 |
| 1442019_at   | RIKEN cDNA B230343A10 gene                                                   | B230343A10Rik     | 2.28  | 0.025 | 1.28  | 0.290 | -2.66 | 0.046 | -1.1  | 0.739 | -1.96 | 0.038 |
| 1452265_at   | CLIP associating protein 1                                                   | Clasp1            | -1.09 | 0.202 | -1.71 | 0.006 | -1.56 | 0.014 | -1.73 | 0.001 | -1.96 | 0.000 |
| 1435954_at   | zinc finger protein 710                                                      | Zfp710            | -1.05 | 0.697 | 2.57  | 0.560 | -1.32 | 0.379 | 1.45  | 0.622 | -1.96 | 0.036 |
| 1443089_at   | RIKEN cDNA 4930506C02 gene                                                   | 4930506C02Rik     | 2.21  | 0.219 | 2.08  | 0.210 | 1.85  | 0.832 | 2.5   | 0.559 | -1.95 | 0.014 |
| 1447839_x_at | adrenomedullin                                                               | Adm               | -1.45 | 0.226 | -2.47 | 0.068 | -1.57 | 0.012 | -1.64 | 0.000 | -1.95 | 0.008 |
| 1444497_at   | cDNA sequence BC059050                                                       | BC059050          | -1.24 | 0.310 | -1.92 | 0.158 | 1.34  | 0.786 | -1.26 | 0.228 | -1.95 | 0.044 |
| 1437939_s_at | cathepsin C                                                                  | Ctsc              | 1.23  | 0.601 | 1.35  | 0.130 | -1.1  | 0.211 | 1.33  | 0.968 | -1.95 | 0.027 |
| 1429783_at   | PDZ and LIM domain 5                                                         | Pdlim5            | -1.3  | 0.170 | -1.51 | 0.040 | -1.84 | 0.005 | -1.89 | 0.000 | -1.95 | 0.046 |
| 1421413_a_at | PDZ and LIM domain 5 /// similar to PDZ and LIM domain protein 5 (Enigm      | Pdlim5 /// LOC669 | 12.26 | 0.588 | 7     | 0.464 | -1.9  | 0.034 | -1.56 | 0.045 | -1.95 | 0.040 |
| 1434096_at   | solute carrier family 4 (anion exchanger), member 4                          | Slc4a4            | 1.18  | 0.982 | -2.13 | 0.057 | -1.4  | 0.075 | -1.57 | 0.011 | -1.95 | 0.008 |
| 1440698_at   | Unc-5 homolog C (C. elegans)                                                 | Unc5c             | -1.44 | 0.145 | -1.71 | 0.170 | -1.27 | 0.125 | -1.09 | 0.722 | -1.95 | 0.004 |
| 1459722_at   | Zinc finger, SWIM domain containing 6                                        | Zswim6            | -1.26 | 0.337 | -1.27 | 0.300 | 1.13  | 0.493 | -1.23 | 0.004 | -1.95 | 0.011 |
| 1452366_at   | RIKEN cDNA 4732435N03 gene                                                   | 4732435N03Rik     | -1.29 | 0.286 | -2.82 | 0.035 | -1.64 | 0.017 | -1.55 | 0.003 | -1.94 | 0.000 |
| 1454486_at   | RIKEN cDNA 9530002O20 gene                                                   | 9530002O20Rik     | 1.31  | 0.784 | -1.16 | 0.414 | 1.19  | 0.630 | -1.13 | 0.291 | -1.94 | 0.014 |
| 1430316_at   | RIKEN cDNA 4930579E17 gene                                                   | 4930579E17Rik     | -1.23 | 0.145 | -4.72 | 0.003 | -1.17 | 0.251 | -1.26 | 0.065 | -1.93 | 0.001 |
| 1428083_at   | RIKEN cDNA 2310043N10 gene                                                   | 2310043N10Rik     | -1.05 | 0.461 | -1.81 | 0.049 | -1.28 | 0.151 | -1.42 | 0.178 | -1.92 | 0.023 |
| 1456870_at   | RIKEN cDNA A430107D22 gene                                                   | A430107D22Rik     | 1.35  | 0.692 | 1.27  | 0.048 | 1.08  | 0.944 | 2.48  | 0.516 | -1.92 | 0.030 |
| 1444641_at   | Adenylate cyclase 3                                                          | Adcy3             | 2     | 0.379 | 2.25  | 0.990 | 1.13  | 0.815 | -1.19 | 0.078 | -1.92 | 0.013 |
| 1441653_at   | RIKEN cDNA D030022P06 gene                                                   | D030022P06Rik     | 1.36  | 0.697 | 1.18  | 0.886 | 1.58  | 0.176 | 1.39  | 0.689 | -1.92 | 0.014 |
| 1422018_at   | human immunodeficiency virus type I enhancer binding protein 2               | Hivep2            | 1.23  | 0.748 | -1.12 | 0.303 | -1.39 | 0.018 | -1.44 | 0.025 | -1.92 | 0.000 |
| 1451908_a_at | SEC14-like 1 (S. cerevisiae)                                                 | Sec14l1           | -1    | 0.584 | -1.09 | 0.434 | 1.43  | 0.802 | 1.04  | 0.952 | -1.92 | 0.029 |
| 1426435_at   | transmembrane protein 135                                                    | Tmem135           | 1.05  | 0.836 | -2.18 | 0.005 | -1.16 | 0.031 | -1.41 | 0.019 | -1.92 | 0.001 |
| 1444652_at   | RIKEN cDNA B830004H01 gene                                                   | B830004H01Rik     | 1.88  | 0.363 | 1.56  | 0.097 | 1.36  | 0.887 | 1.93  | 0.232 | -1.91 | 0.035 |
| 1428902_at   | carbohydrate sulfotransferase 11                                             | Chst11            | -1.24 | 0.125 | -3.04 | 0.005 | -1.85 | 0.002 | -1.71 | 0.004 | -1.91 | 0.001 |
| 1439238_at   | unc-84 homolog B (C. elegans)                                                | Unc84b            | -1.23 | 0.324 | 1.09  | 0.798 | -1.4  | 0.194 | 1.28  | 0.792 | -1.91 | 0.026 |
| 1434719_at   | alpha-2-macroglobulin /// hypothetical protein LOC677369                     | A2m /// LOC67736  | 1.05  | 0.559 | 1.13  | 0.938 | 1.16  | 0.604 | -1.2  | 0.223 | -1.9  | 0.024 |
| 1429569_a_at | coiled-coil domain containing 46                                             | Ccdc46            | 1.3   | 0.953 | 1.2   | 0.631 | 1.17  | 0.743 | -1.36 | 0.288 | -1.9  | 0.048 |
| 1420806_at   | fibroblast growth factor 16                                                  | Fgf16             | -1.03 | 0.182 | 2.72  | 0.756 | 1.93  | 0.841 | 1.35  | 0.054 | -1.9  | 0.010 |
| 1443335_at   | PDZ domain containing RING finger 3                                          | Pdzrn3            | -1.26 | 0.324 | -1.26 | 0.249 | -1.01 | 0.764 | 1.16  | 0.936 | -1.9  | 0.004 |
| 1431110_at   | RIKEN cDNA 5430431D22 gene                                                   | 5430431D22Rik     | -1.28 | 0.197 | -4.34 | 0.012 | -1.93 | 0.004 | -1.85 | 0.023 | -1.89 | 0.015 |
| 1445848_at   | hypothetical protein 9630009C16                                              | 9630009C16        | 1.47  | 0.625 | 1.01  | 0.462 | -1.51 | 0.183 | -1.18 | 0.414 | -1.89 | 0.034 |
| 1444071_at   | RIKEN cDNA 9630013A20 gene                                                   | 9630013A20Rik     | 1.12  | 0.580 | 2.36  | 0.590 | -1.15 | 0.321 | 1.42  | 0.149 | -1.89 | 0.040 |
| 1454780_at   | UDP-N-acetyl-alpha-D-galactosamine:polypeptide N-acetyl-galactosaminylt      | Galnt4            | -1.13 | 0.099 | -1.97 | 0.000 | -1.73 | 0.000 | -1.49 | 0.000 | -1.89 | 0.000 |
| 1452714_at   | tetratricopeptide repeat, ankyrin repeat and coiled-coil containing 1        | Tanc1             | 1.07  | 0.602 | -1.79 | 0.011 | -1.62 | 0.004 | -1.86 | 0.009 | -1.89 | 0.001 |
| 1439033_at   | zinc finger, CCHC domain containing 7                                        | Zcchc7            | 1.41  | 0.032 | -1    | 0.703 | -1.42 | 0.078 | -1.14 | 0.134 | -1.89 | 0.009 |
| 1442226_at   | hypothetical protein 6430702L12                                              | 6430702L12        | 1.29  | 0.734 | -1.23 | 0.202 | -1.15 | 0.231 | -1.07 | 0.414 | -1.88 | 0.024 |
| 1444432_at   | RIKEN cDNA D330040H18 gene                                                   | D330040H18Rik     | 1.79  | 0.937 | 1.49  | 0.327 | 1.18  | 0.736 | 2.12  | 0.836 | -1.88 | 0.046 |
| 1428647_at   | region containing RIKEN cDNA 2310056B04 gene; pre B-cell leukemia tra        | LOC676870         | 1.49  | 0.973 | -1.62 | 0.142 | -1.34 | 0.114 | -1.46 | 0.027 | -1.88 | 0.043 |
| 1434179_at   | myeloid/lymphoid or mixed-lineage leukemia 3                                 | Mll3              | -1.06 | 0.375 | -2.61 | 0.014 | -1.32 | 0.046 | -1.36 | 0.017 | -1.88 | 0.009 |
| 1455030_at   | protein tyrosine phosphatase, receptor type, J                               | Ptpnj             | -1.5  | 0.018 | -2.07 | 0.027 | -1.36 | 0.207 | -1.54 | 0.024 | -1.88 | 0.004 |
| 1416966_at   | solute carrier family 22 (organic anion transporter), member 8               | Slc22a8           | 2.16  | 0.087 | 2.81  | 0.058 | 1.68  | 0.184 | -1.16 | 0.504 | -1.88 | 0.023 |
| 1455469_at   | solute carrier family 6 (neurotransmitter transporter, L-proline), member 7  | Slc6a7            | 1.05  | 0.986 | 1.78  | 0.359 | 2.33  | 0.054 | -1.3  | 0.210 | -1.88 | 0.002 |
| 1443531_at   | RIKEN cDNA A930005I04 gene                                                   | A930005I04Rik     | 1.14  | 0.960 | 1.39  | 0.789 | 1.44  | 0.991 | 1.52  | 0.853 | -1.87 | 0.014 |
| 1441055_at   | paralemmin 2                                                                 | Palm2             | -1.3  | 0.362 | -1.73 | 0.295 | -1.42 | 0.015 | -1.89 | 0.010 | -1.87 | 0.004 |
| 1425724_at   | protein tyrosine phosphatase, receptor type, N polypeptide 2                 | Ptprn2            | 2.25  | 0.767 | 1.58  | 0.101 | -1.14 | 0.463 | 1.55  | 0.733 | -1.87 | 0.044 |
| 1434222_at   | signal-induced proliferation-associated 1 like 1                             | Sipa11l           | 1.05  | 0.438 | -1.77 | 0.001 | -1.76 | 0.006 | -1.71 | 0.008 | -1.87 | 0.001 |
| 1424934_at   | UDP glucuronosyltransferase 2 family, polypeptide B1                         | Ugt2b1            | -2.01 | 0.090 | 1.01  | 0.562 | 1.42  | 0.593 | 1.13  | 0.699 | -1.87 | 0.046 |
| 1454069_at   | RIKEN cDNA 9030409C19 gene                                                   | 9030409C19Rik     | 3.2   | 0.624 | 2.8   | 0.791 | -1.29 | 0.132 | 1.27  | 0.991 | -1.86 | 0.050 |

|              |                                                                                               |       |       |       |       |       |       |       |       |       |       |
|--------------|-----------------------------------------------------------------------------------------------|-------|-------|-------|-------|-------|-------|-------|-------|-------|-------|
| 1447394_at   | chloride channel calcium activated 6 /// expressed sequence A1747448 /// : Clca6 /// A1747448 | -1    | 0.525 | -1.32 | 0.251 | 2.64  | 0.686 | -1.13 | 0.534 | -1.86 | 0.032 |
| 1442282_at   | Similar to vomeronasal 2, receptor, 2                                                         | 1.18  | 0.463 | -1.27 | 0.414 | -1.37 | 0.269 | 1.54  | 0.733 | -1.86 | 0.042 |
| 1449351_s_at | platelet-derived growth factor, C polypeptide                                                 | 1.07  | 0.742 | -1.92 | 0.015 | -1.75 | 0.012 | -1.91 | 0.007 | -1.86 | 0.000 |
| 1447054_at   | expressed sequence C85395                                                                     | -1.27 | 0.320 | -1.37 | 0.183 | -1.05 | 0.743 | -1.46 | 0.138 | -1.85 | 0.028 |
| 1459098_at   | Dystonin                                                                                      | 1.34  | 0.287 | 1.34  | 0.243 | -1.27 | 0.231 | -1.11 | 0.501 | -1.85 | 0.038 |
| 1421689_at   | keratin associated protein 8-2                                                                | 1.8   | 0.997 | 1.95  | 0.342 | 1.75  | 0.605 | 1.08  | 0.856 | -1.85 | 0.020 |
| 1441264_x_at | RIKEN cDNA A930005H10 gene                                                                    | 2.64  | 0.005 | 1.33  | 0.867 | 3.65  | 0.233 | 1.06  | 0.882 | -1.84 | 0.041 |
| 1446679_at   | Glutamate receptor, metabotropic 5                                                            | 1.08  | 0.588 | 1.17  | 0.635 | 1.16  | 0.567 | -1.21 | 0.254 | -1.84 | 0.002 |
| 1452982_at   | insulin-like growth factor I receptor                                                         | -1.05 | 0.553 | -2.17 | 0.008 | -1.54 | 0.002 | -1.59 | 0.020 | -1.84 | 0.022 |
| 1438666_at   | low density lipoprotein receptor class A domain containing 3                                  | -1.09 | 0.260 | -2.56 | 0.005 | -1.18 | 0.421 | -1.59 | 0.007 | -1.84 | 0.013 |
| 1450786_x_at | similar to PDZ and LIM domain protein 5 (Enigma homolog) (Enigma-like F                       | 1.02  | 0.849 | -1.74 | 0.031 | -1.77 | 0.021 | -1.76 | 0.004 | -1.84 | 0.009 |
| 1451839_a_at | phosphodiesterase 7A                                                                          | 1.24  | 0.227 | 1.3   | 0.699 | -1.21 | 0.208 | -1.11 | 0.305 | -1.84 | 0.025 |
| 1433282_at   | RIKEN cDNA 4930529H12 gene                                                                    | -1.54 | 0.305 | 1.05  | 0.469 | 2.66  | 0.108 | 1.44  | 0.238 | -1.83 | 0.018 |
| 1455136_at   | ATPase, Na+/K+ transporting, alpha 2 polypeptide                                              | -1.27 | 0.242 | 1.82  | 0.589 | 1.6   | 0.657 | 1.9   | 0.748 | -1.83 | 0.006 |
| 1459804_at   | CREB binding protein                                                                          | 2.63  | 0.394 | 2.59  | 0.284 | -1.91 | 0.158 | -1    | 0.776 | -1.83 | 0.007 |
| 1417590_at   | cytochrome P450, family 27, subfamily a, polypeptide 1                                        | 1.28  | 0.831 | -1.19 | 0.202 | 1.76  | 0.092 | 1.57  | 0.009 | -1.83 | 0.030 |
| 1430353_at   | GLIS family zinc finger 3                                                                     | -1.28 | 0.287 | -2.82 | 0.062 | -1.49 | 0.008 | -1.88 | 0.020 | -1.83 | 0.000 |
| 1437273_at   | HtrA serine peptidase 4                                                                       | -1.32 | 0.165 | 1.41  | 0.569 | -1.37 | 0.284 | 1.03  | 0.724 | -1.83 | 0.024 |
| 1424933_at   | myosin VC                                                                                     | -1.2  | 0.299 | 1.05  | 0.949 | 1.44  | 0.890 | -1.27 | 0.225 | -1.83 | 0.017 |
| 1437069_at   | oxysterol binding protein-like 8                                                              | -1.17 | 0.236 | -1.76 | 0.075 | -1.21 | 0.151 | -1.17 | 0.207 | -1.83 | 0.014 |
| 1428822_a_at | sorting nexin 24                                                                              | -1.09 | 0.370 | -1.98 | 0.016 | -1.53 | 0.043 | -1.58 | 0.015 | -1.83 | 0.000 |
| 1434393_at   | ubiquitin specific peptidase 34                                                               | 1.57  | 0.150 | 1.09  | 0.548 | -1.29 | 0.011 | -1.4  | 0.014 | -1.83 | 0.015 |
| 1435240_at   | bromodomain adjacent to zinc finger domain, 2B                                                | -1.06 | 0.442 | -2.05 | 0.015 | -1.06 | 0.385 | -1.57 | 0.026 | -1.82 | 0.028 |
| 1443595_at   | CCR4-NOT transcription complex, subunit 6-like                                                | 1.54  | 0.832 | -1.62 | 0.106 | 2.6   | 0.112 | 1.22  | 0.716 | -1.82 | 0.035 |
| 1435298_at   | component of oligomeric golgi complex 5                                                       | 2.41  | 0.668 | 1.53  | 0.839 | 1.82  | 0.854 | 1.07  | 0.877 | -1.82 | 0.010 |
| 1447295_at   | Cut-like 1 (Drosophila)                                                                       | -1.25 | 0.384 | -1.19 | 0.400 | -1.33 | 0.183 | -1.13 | 0.504 | -1.82 | 0.012 |
| 1450420_at   | stromal antigen 1                                                                             | 3.08  | 0.736 | 1.18  | 0.120 | -1.44 | 0.066 | -1.65 | 0.022 | -1.82 | 0.019 |
| 1445558_at   | RIKEN cDNA 5930430L01 gene                                                                    | -1.03 | 0.502 | 1.05  | 0.797 | -1    | 0.889 | 1.27  | 0.028 | -1.81 | 0.007 |
| 1457470_at   | DNA segment, Chr 3, ERATO Doi 452, expressed                                                  | -1.13 | 0.414 | -1.18 | 0.393 | -1.51 | 0.097 | -1.48 | 0.027 | -1.81 | 0.035 |
| 1417321_at   | DNA segment, Chr 4, Wayne State University 132, expressed                                     | -1.22 | 0.383 | -1.41 | 0.301 | -1.24 | 0.025 | -1.68 | 0.012 | -1.81 | 0.019 |
| 1440111_at   | Formin-like 2                                                                                 | 3.19  | 0.637 | 4.49  | 0.483 | 1.13  | 0.671 | 4.05  | 0.488 | -1.81 | 0.006 |
| 1422319_at   | UDP-N-acetyl-alpha-D-galactosamine:polypeptide N-acetylglucosaminyl                           | 1.14  | 0.939 | 1.88  | 0.607 | -1.5  | 0.072 | -1.75 | 0.065 | -1.81 | 0.031 |
| 1446053_at   | G patch domain and KOW motifs                                                                 | -1.64 | 0.014 | -1.15 | 0.250 | -1.4  | 0.056 | -1.36 | 0.232 | -1.81 | 0.005 |
| 1441321_at   | hypothetical LOC552911                                                                        | 1.17  | 0.691 | 1.05  | 0.494 | -1.23 | 0.215 | 1.15  | 0.602 | -1.81 | 0.035 |
| 1437636_at   | Similar to Interferon-activatable protein 203 (Ifi-203) (Interferon-inducible                 | -1.54 | 0.225 | -1.48 | 0.091 | -1.02 | 0.837 | 1.71  | 0.372 | -1.81 | 0.041 |
| 1436907_at   | neuron navigator 1                                                                            | -1.15 | 0.110 | -2.36 | 0.006 | -1.37 | 0.019 | -1.58 | 0.000 | -1.81 | 0.002 |
| 1418749_at   | pleckstrin and Sec7 domain containing 3                                                       | -1.11 | 0.309 | -2.21 | 0.043 | -1.5  | 0.008 | -1.4  | 0.051 | -1.81 | 0.001 |
| 1427017_at   | special AT-rich sequence binding protein 2                                                    | 1.49  | 0.412 | -1.21 | 0.243 | -1.32 | 0.181 | -1.32 | 0.003 | -1.81 | 0.037 |
| 1425906_a_at | sema domain, immunoglobulin domain (Ig), short basic domain, secreted,                        | 6.51  | 0.487 | 1.79  | 0.735 | -1.23 | 0.164 | -1.38 | 0.055 | -1.81 | 0.035 |
| 1457715_at   | RIKEN cDNA 1010001B22 gene                                                                    | 1.02  | 0.914 | 2.22  | 0.479 | 1.32  | 0.406 | -1.03 | 0.507 | -1.8  | 0.041 |
| 1455276_x_at | RIKEN cDNA 1110004E09 gene                                                                    | -1.05 | 0.515 | 1.25  | 0.338 | 1.62  | 0.431 | 1.64  | 0.198 | -1.8  | 0.030 |
| 1450879_at   | ATPas, class II, type 9B                                                                      | 1.12  | 0.754 | -1.43 | 0.082 | -1.34 | 0.052 | -1.26 | 0.038 | -1.8  | 0.018 |
| 1419320_at   | carbohydrate (N-acetylglucosamine 6-O) sulfotransferase 5                                     | -1.1  | 0.248 | 1.31  | 0.677 | -1.67 | 0.110 | 1.79  | 0.448 | -1.8  | 0.044 |
| 1456067_at   | GLI-Kruppel family member GLI3                                                                | -1.02 | 0.632 | -2.15 | 0.005 | -1.56 | 0.025 | -1.77 | 0.019 | -1.8  | 0.008 |
| 1452344_at   | synaptotjanin 2                                                                               | -1.19 | 0.166 | -1.11 | 0.442 | -1.49 | 0.081 | -1.25 | 0.174 | -1.8  | 0.029 |
| 1443896_at   | TBC1 domain family, member 5                                                                  | -1.07 | 0.568 | -2.53 | 0.002 | -1.67 | 0.015 | -1.32 | 0.087 | -1.8  | 0.003 |
| 1456021_at   | activating transcription factor 6                                                             | 1.15  | 0.680 | -1.5  | 0.046 | -1.37 | 0.013 | -1.28 | 0.133 | -1.79 | 0.005 |
| 1455729_at   | guanine nucleotide binding protein, alpha q polypeptide                                       | -1.26 | 0.287 | -2.02 | 0.098 | -1.47 | 0.017 | -1.76 | 0.008 | -1.79 | 0.009 |
| 1435229_at   | GRAM domain containing 1B                                                                     | 1.67  | 0.750 | -1.63 | 0.224 | 3.21  | 0.959 | 1.2   | 0.465 | -1.79 | 0.047 |
| 1442278_at   | Jumonji, AT rich interactive domain 1B (Rbp2 like)                                            | 1.33  | 0.173 | 1.09  | 0.959 | -1.41 | 0.167 | 1.29  | 0.062 | -1.79 | 0.014 |
| 1455260_at   | ligand dependent nuclear receptor corepressor-like                                            | -1.28 | 0.315 | -2.02 | 0.101 | -1.09 | 0.453 | -1.39 | 0.100 | -1.79 | 0.011 |
| 1444406_at   | Mitogen-activated protein kinase kinase kinase 3                                              | -1.39 | 0.282 | -1.53 | 0.184 | 1.24  | 0.367 | 1.71  | 0.841 | -1.79 | 0.003 |
| 1420870_at   | myeloid/lymphoid or mixed lineage-leukemia translocation to 10 homolog                        | 1.12  | 0.303 | -1    | 0.933 | -1.26 | 0.070 | -1.33 | 0.017 | -1.79 | 0.002 |
| 1452324_at   | plasmacytoma variant translocation 1                                                          | -1.19 | 0.408 | -1.3  | 0.382 | -1.39 | 0.067 | -1.4  | 0.015 | -1.79 | 0.004 |
| 1452082_at   | RIKEN cDNA 6430548M08 gene                                                                    | 1.22  | 0.791 | -1.18 | 0.331 | 1.42  | 0.723 | 1.26  | 0.458 | -1.78 | 0.046 |
| 1442175_at   | RIKEN cDNA C030027H14 gene                                                                    | -1.31 | 0.060 | -4.62 | 0.014 | -1.48 | 0.005 | -1.6  | 0.022 | -1.78 | 0.019 |
| 1457176_at   | GTPase activating RANGAP domain-like 1                                                        | 1.67  | 0.040 | 1.42  | 0.244 | -1.2  | 0.001 | -1.21 | 0.063 | -1.78 | 0.029 |
| 1449542_at   | pre B-cell leukemia transcription factor 1                                                    | -1.74 | 0.083 | -2.25 | 0.056 | -1.89 | 0.074 | -1.57 | 0.076 | -1.78 | 0.011 |

|              |                                                                                 |                  |       |       |       |       |       |       |       |       |       |       |
|--------------|---------------------------------------------------------------------------------|------------------|-------|-------|-------|-------|-------|-------|-------|-------|-------|-------|
| 1454900_s_at | pam, highwire, rpm 1                                                            | Phr1             | -1.13 | 0.417 | -1.97 | 0.055 | -1.37 | 0.024 | -1.64 | 0.005 | -1.78 | 0.026 |
| 1453984_at   | phosphatidylinositol 3-kinase, regulatory subunit, polypeptide 2 (p85 beta)     | Pik3r2 // Iff30  | 1.83  | 0.805 | 2.37  | 0.583 | -1.02 | 0.553 | 1.31  | 0.264 | -1.78 | 0.019 |
| 1454345_at   | RIKEN cDNA 1700081H04 gene                                                      | 1700081H04Rik    | -1.61 | 0.280 | -1.55 | 0.188 | 1.54  | 0.308 | 1.37  | 0.492 | -1.77 | 0.045 |
| 1453491_at   | RIKEN cDNA 4833409A17 gene                                                      | 4833409A17Rik    | 1.22  | 0.881 | 1.94  | 0.328 | 1.17  | 0.905 | -1.31 | 0.237 | -1.77 | 0.039 |
| 1440163_at   | RIKEN cDNA 6030490B17 gene                                                      | 6030490B17Rik    | -1.12 | 0.131 | 1.05  | 0.787 | 1.08  | 0.333 | 1.26  | 0.339 | -1.77 | 0.014 |
| 1425099_a_at | aryl hydrocarbon receptor nuclear translocator-like                             | Arntl            | -1.08 | 0.412 | -1.56 | 0.015 | -1.38 | 0.020 | -1.43 | 0.010 | -1.77 | 0.007 |
| 1438989_s_at | RIKEN cDNA B130021B11 gene                                                      | B130021B11Rik    | -1.5  | 0.357 | -3.71 | 0.279 | -1.66 | 0.090 | -1.37 | 0.031 | -1.77 | 0.044 |
| 1437765_at   | cytoplasmic polyadenylation element binding protein 3                           | Cpeb3            | 1.38  | 0.568 | -1.48 | 0.165 | -1.01 | 0.432 | -1.4  | 0.057 | -1.77 | 0.028 |
| 1458226_at   | filamin, beta                                                                   | Flnb             | 2.27  | 0.394 | 2.09  | 0.658 | -1    | 0.552 | -1.21 | 0.152 | -1.77 | 0.042 |
| 1455685_at   | microtubule associated monooxygenase, calponin and LIM domain containi          | Mical2           | 1.34  | 0.833 | -1    | 0.305 | -1.59 | 0.018 | -1.61 | 0.029 | -1.77 | 0.029 |
| 1444232_at   | protein kinase, cGMP-dependent, type I                                          | Prkg1            | -1.62 | 0.014 | -2.34 | 0.001 | -1.58 | 0.011 | -1.35 | 0.096 | -1.77 | 0.016 |
| 1435537_at   | protein tyrosine phosphatase, receptor type, D                                  | Ptprd            | -1.57 | 0.115 | -1.44 | 0.139 | -1.33 | 0.330 | -1.64 | 0.111 | -1.77 | 0.029 |
| 1434062_at   | RAB GTPase activating protein 1-like                                            | Rabgap1l         | -1.46 | 0.191 | -1.5  | 0.185 | -1.18 | 0.522 | -1.21 | 0.283 | -1.77 | 0.041 |
| 1451332_at   | zinc finger protein 521                                                         | Zfp521           | -1.06 | 0.376 | -3.24 | 0.019 | -1.62 | 0.003 | -1.37 | 0.009 | -1.77 | 0.001 |
| 1431424_at   | RIKEN cDNA 2810055G20 gene                                                      | 2810055G20Rik    | -1.02 | 0.934 | 1.22  | 0.703 | 1.49  | 0.732 | -1.02 | 0.896 | -1.76 | 0.049 |
| 1453540_at   | RIKEN cDNA 5430404G13 gene                                                      | 5430404G13Rik    | -1.18 | 0.409 | -1.4  | 0.219 | -1.1  | 0.403 | -1.22 | 0.146 | -1.76 | 0.040 |
| 1429579_at   | RIKEN cDNA 6330407I18 gene                                                      | 6330407I18Rik    | 1.37  | 0.889 | -1.46 | 0.112 | -1.4  | 0.047 | -1.28 | 0.037 | -1.76 | 0.015 |
| 1430448_at   | RIKEN cDNA 6720418B01 gene                                                      | 6720418B01Rik    | 1.1   | 0.726 | -1.16 | 0.436 | 1     | 0.468 | -1.11 | 0.650 | -1.76 | 0.043 |
| 1441980_at   | RIKEN cDNA C030007I09 gene                                                      | C030007I09Rik    | -1.15 | 0.394 | -2.11 | 0.127 | -1.33 | 0.031 | -1.38 | 0.102 | -1.76 | 0.003 |
| 1450932_s_at | dedicator of cytokinesis 9 /// similar to Dedicator of cytokinesis protein 9 (C | Dock9 // LOC6703 | 1.06  | 0.582 | -3.95 | 0.010 | -1.3  | 0.114 | -1.47 | 0.005 | -1.76 | 0.006 |
| 1455989_at   | gap junction membrane channel protein alpha 12                                  | Gja12            | 1.3   | 0.431 | -1.08 | 0.467 | 1.19  | 0.999 | -1.2  | 0.383 | -1.76 | 0.034 |
| 1449098_a_at | polymerase (DNA directed), iota                                                 | Poli             | 3.5   | 0.486 | 3.63  | 0.433 | 1.09  | 0.501 | -1.27 | 0.341 | -1.76 | 0.015 |
| 1423471_at   | polypyrimidine tract binding protein 2                                          | Ptbp2            | 1.03  | 0.701 | -1.04 | 0.520 | -1.41 | 0.232 | -1.24 | 0.244 | -1.76 | 0.027 |
| 1416674_at   | protein tyrosine phosphatase, receptor type, U                                  | Ptpru            | 1.56  | 0.832 | 1.6   | 0.670 | 1.36  | 0.459 | -1.45 | 0.087 | -1.76 | 0.015 |
| 1418792_at   | SH3-domain GRB2-like 2                                                          | Sh3gl2           | -1.1  | 0.452 | -1.06 | 0.442 | 2.12  | 0.921 | -1.04 | 0.204 | -1.76 | 0.039 |
| 1419092_a_at | STE20-like kinase (yeast)                                                       | Slk              | 1.09  | 0.021 | 1.55  | 0.183 | 1.21  | 0.565 | 1.27  | 0.496 | -1.76 | 0.017 |
| 1425290_at   | syntaxin 19                                                                     | Stx19            | 2.11  | 0.562 | 1.29  | 0.662 | -1.27 | 0.376 | 1.28  | 0.573 | -1.76 | 0.034 |
| 1423434_at   | TEA domain family member 1                                                      | Tead1            | 1.11  | 0.694 | -1.47 | 0.146 | -1.28 | 0.088 | -1.49 | 0.017 | -1.76 | 0.011 |
| 1433795_at   | transforming growth factor, beta receptor III                                   | Tgfb3            | 1.36  | 0.587 | -2.63 | 0.151 | -1.31 | 0.119 | -1.35 | 0.127 | -1.76 | 0.030 |
| 1456658_at   | actin, alpha 2, smooth muscle, aorta                                            | Acta2            | 2.03  | 0.590 | 2.06  | 0.931 | -1.22 | 0.014 | -1.12 | 0.480 | -1.75 | 0.014 |
| 1457506_at   | Amyotrophic lateral sclerosis 2 (juvenile) chromosome region, candidate 1'      | Als2cr19         | -1.02 | 0.858 | 1.13  | 0.487 | -1.22 | 0.234 | 2.06  | 0.958 | -1.75 | 0.002 |
| 1458724_at   | RIKEN cDNA E230008O15 gene                                                      | E230008O15Rik    | 3.77  | 0.189 | 3.84  | 0.129 | 2.47  | 0.099 | 1.17  | 0.837 | -1.75 | 0.046 |
| 1421486_at   | early growth response 3                                                         | Egr3             | -1.42 | 0.377 | 2.11  | 0.539 | 1.65  | 0.942 | -1.22 | 0.354 | -1.75 | 0.016 |
| 1425252_a_at | mitotic arrest deficient 1-like 1                                               | Mad11            | 1.48  | 0.971 | -2.23 | 0.048 | -1.28 | 0.088 | -1.28 | 0.202 | -1.75 | 0.011 |
| 1425924_at   | MyoD family inhibitor                                                           | Mdfi             | -1.27 | 0.228 | 1.06  | 0.488 | 1.3   | 0.776 | 1.59  | 0.104 | -1.75 | 0.027 |
| 1416980_at   | methyltransferase like 7B                                                       | Mettl7b          | 1.84  | 0.790 | 1.66  | 0.755 | 1.33  | 0.995 | -1.02 | 0.502 | -1.75 | 0.032 |
| 1439467_at   | Microtubule-associated protein 4                                                | Mtap4            | 1.05  | 0.612 | -1.02 | 0.940 | -1.5  | 0.021 | -1.17 | 0.436 | -1.75 | 0.045 |
| 1419189_at   | vesicle transport through interaction with t-SNAREs homolog 1A (yeast)          | Vti1a            | 2.05  | 0.554 | -1.83 | 0.137 | -1.28 | 0.324 | -1.36 | 0.139 | -1.75 | 0.008 |
| 1436925_at   | checkpoint suppressor 1                                                         | Ches1            | -1.25 | 0.262 | -2.11 | 0.048 | -1.12 | 0.452 | -1.46 | 0.081 | -1.74 | 0.014 |
| 1450063_at   | formin 2                                                                        | Fmn2             | -1.57 | 0.024 | -2.47 | 0.003 | -1.77 | 0.006 | -1.48 | 0.012 | -1.74 | 0.007 |
| 1457707_at   | gene model 489, (NCBI)                                                          | Gm489            | 1.1   | 0.900 | 1.02  | 0.892 | 1.56  | 0.351 | -1.1  | 0.381 | -1.74 | 0.050 |
| 1433431_at   | pancreatic lipase                                                               | Pnlip            | -1.12 | 0.308 | 1.56  | 0.730 | 1.53  | 0.790 | 2.29  | 0.101 | -1.74 | 0.030 |
| 1440379_at   | solute carrier family 1 (neutral amino acid transporter), member 5              | Slc1a5           | -1.31 | 0.359 | 1.24  | 0.105 | -1.24 | 0.164 | 1.01  | 0.883 | -1.74 | 0.048 |
| 1454706_at   | UV radiation resistance associated gene                                         | Uvrag            | -1.04 | 0.271 | -1.95 | 0.005 | -1.53 | 0.005 | -1.98 | 0.004 | -1.73 | 0.000 |
| 1436302_at   | RIKEN cDNA 2410193C02 gene                                                      | 2410193C02Rik    | -1.12 | 0.236 | -2.26 | 0.003 | -1.46 | 0.015 | -1.52 | 0.001 | -1.72 | 0.010 |
| 1437869_at   | RIKEN cDNA 3222402P14 gene                                                      | 3222402P14Rik    | -1.12 | 0.021 | -1.88 | 0.005 | -1.29 | 0.159 | -1.14 | 0.287 | -1.72 | 0.040 |
| 1433939_at   | hypothetical protein A730046J16                                                 | A730046J16       | -1.3  | 0.090 | -2.39 | 0.020 | -1.19 | 0.151 | -1.53 | 0.014 | -1.72 | 0.005 |
| 1458238_at   | AT rich interactive domain 5B (Mrf1 like)                                       | Arid5b           | -1    | 0.920 | 2.2   | 0.817 | 1.24  | 0.976 | -1.16 | 0.288 | -1.72 | 0.046 |
| 1454958_at   | glycogen synthase kinase 3 beta                                                 | Gsk3b            | 1.33  | 0.417 | -1.09 | 0.447 | -1.41 | 0.025 | -1.62 | 0.001 | -1.72 | 0.001 |
| 1456062_at   | natriuretic peptide precursor type A                                            | Nppa             | -1.07 | 0.477 | -1.07 | 0.440 | 2.45  | 0.031 | -1.21 | 0.388 | -1.72 | 0.046 |
| 1439187_at   | vacuolar protein sorting 13 D (yeast)                                           | Vps13d           | 1.26  | 0.453 | -1.27 | 0.211 | -1.59 | 0.003 | -1.59 | 0.001 | -1.72 | 0.001 |
| 1429556_at   | RIKEN cDNA 2610024B07 gene                                                      | 2610024B07Rik    | -1.01 | 0.892 | -1.47 | 0.030 | -1.46 | 0.030 | -1.52 | 0.052 | -1.71 | 0.012 |
| 1457672_at   | chromodomain helicase DNA binding protein 9                                     | Chd9             | -1.09 | 0.413 | -1.51 | 0.090 | -1.5  | 0.003 | -1.32 | 0.026 | -1.71 | 0.031 |
| 1449291_a_at | discoidin, CUB and LCCL domain containing 1                                     | Dcbd1            | 2.23  | 0.514 | 1.75  | 0.697 | -1.1  | 0.430 | -1.17 | 0.142 | -1.71 | 0.002 |
| 1424586_at   | EH domain binding protein 1                                                     | Ehbp1            | -1.19 | 0.028 | -2.61 | 0.004 | -1.37 | 0.008 | -1.44 | 0.014 | -1.71 | 0.031 |
| 1451804_a_at | leucine rich repeat containing 16                                               | Lrrc16           | 1     | 0.759 | -3.49 | 0.004 | -1.37 | 0.018 | -1.96 | 0.005 | -1.71 | 0.014 |
| 1441823_at   | retinoic acid induced 17                                                        | Rai17            | -1.16 | 0.427 | -1.6  | 0.214 | -1.2  | 0.221 | -1.19 | 0.282 | -1.71 | 0.028 |
| 1457357_at   | tousled-like kinase 2 (Arabidopsis)                                             | Tlk2             | 1.07  | 0.695 | -1.21 | 0.270 | 1.11  | 0.738 | 1.09  | 0.654 | -1.71 | 0.011 |

|              |                                                                                   |                   |       |       |       |       |       |       |       |       |       |       |
|--------------|-----------------------------------------------------------------------------------|-------------------|-------|-------|-------|-------|-------|-------|-------|-------|-------|-------|
| 1440314_at   | Thyroid hormone receptor interactor 12                                            | Trip12            | -1.22 | 0.390 | -1.2  | 0.421 | -1.31 | 0.200 | -1.28 | 0.007 | -1.71 | 0.011 |
| 1431576_at   | RIKEN cDNA 4933404K08 gene                                                        | 4933404K08Rik     | 1.44  | 0.937 | -1.75 | 0.162 | 1.4   | 0.794 | 1.27  | 0.919 | -1.7  | 0.042 |
| 1442063_at   | RIKEN cDNA 5930437A14 gene                                                        | 5930437A14Rik     | -1.09 | 0.220 | -1.31 | 0.157 | -1.23 | 0.181 | -1.33 | 0.029 | -1.7  | 0.008 |
| 1437216_at   | RIKEN cDNA A430106J12 gene                                                        | A430106J12Rik     | 1.11  | 0.222 | -1.3  | 0.181 | -1.35 | 0.021 | -1.32 | 0.037 | -1.7  | 0.043 |
| 1434264_at   | ankyrin 2, brain                                                                  | Ank2              | 1.43  | 0.875 | -1.18 | 0.227 | -1.17 | 0.359 | -1.06 | 0.447 | -1.7  | 0.012 |
| 1447272_s_at | ATPase, class V, type 10A                                                         | Atp10a            | 2.18  | 0.766 | -1.82 | 0.084 | -1.33 | 0.150 | -1.31 | 0.106 | -1.7  | 0.030 |
| 1460319_at   | fucosyltransferase 8                                                              | Fut8              | 1.29  | 0.810 | -1.67 | 0.056 | -1.32 | 0.076 | -1.26 | 0.030 | -1.7  | 0.011 |
| 1422698_s_at | jumonji, AT rich interactive domain 2                                             | Jarid2            | 1.11  | 0.755 | -2.04 | 0.009 | -1.58 | 0.007 | -1.64 | 0.018 | -1.7  | 0.034 |
| 1457316_at   | microtubule-associated protein 6                                                  | Mtap6             | -1.19 | 0.017 | -1.58 | 0.001 | -1.47 | 0.075 | -1.37 | 0.007 | -1.7  | 0.006 |
| 1437181_at   | pellino 2                                                                         | Peli2             | -1.11 | 0.129 | -2.09 | 0.005 | -1.46 | 0.002 | -1.59 | 0.002 | -1.7  | 0.006 |
| 1429449_at   | sterile alpha motif domain containing 4                                           | Samd4             | 1.3   | 0.449 | -1.28 | 0.218 | -1.71 | 0.009 | -1.48 | 0.013 | -1.7  | 0.010 |
| 1424358_at   | ubiquitin-conjugating enzyme E2E 2 (UBC4/5 homolog, yeast)                        | Ube2e2            | -1.34 | 0.163 | -2.76 | 0.034 | -1.43 | 0.014 | -1.63 | 0.000 | -1.7  | 0.001 |
| 1447623_s_at | RIKEN cDNA C130009A20 gene                                                        | C130009A20Rik     | -1.64 | 0.226 | -4.15 | 0.099 | -1.49 | 0.029 | -1.74 | 0.005 | -1.69 | 0.008 |
| 1449558_at   | coagulation factor VIII                                                           | F8                | 1.15  | 0.968 | 1.05  | 0.630 | 1.04  | 0.684 | 1.02  | 0.881 | -1.69 | 0.030 |
| 1439688_at   | fibulin 1                                                                         | Fbln1             | 1.64  | 0.293 | -1.61 | 0.149 | 1.24  | 0.209 | -1.41 | 0.015 | -1.69 | 0.035 |
| 1419297_at   | histocompatibility 2, O region alpha locus                                        | H2-Oa             | -1    | 0.591 | 1.13  | 0.827 | -1.01 | 0.234 | 1.58  | 0.508 | -1.69 | 0.015 |
| 1427073_at   | lactation elevated 1                                                              | Lace1             | -1.2  | 0.172 | -1.94 | 0.081 | -1.19 | 0.097 | -1.09 | 0.479 | -1.69 | 0.023 |
| 1426759_at   | mitogen-activated protein kinase kinase kinase 3 /// similar to mitog             | Map4k3 /// LOC67: | 1.12  | 0.152 | -1.2  | 0.049 | -1.41 | 0.047 | -1.51 | 0.007 | -1.69 | 0.001 |
| 1419599_s_at | membrane-spanning 4-domains, subfamily A, member 11                               | Ms4a11            | 1.39  | 0.425 | 1.1   | 0.744 | 1.52  | 0.399 | -1.02 | 0.928 | -1.69 | 0.013 |
| 1421597_a_at | homeo box, msh-like 3                                                             | Msx3              | 1.02  | 0.465 | 1.6   | 0.957 | 1.69  | 0.605 | 1.25  | 0.948 | -1.69 | 0.019 |
| 1449270_at   | plexin domain containing 2                                                        | Plxdc2            | -1.29 | 0.125 | -1.65 | 0.033 | -1.27 | 0.207 | -1.68 | 0.062 | -1.69 | 0.046 |
| 1452878_at   | protein kinase C, epsilon                                                         | Prkce             | -1.75 | 0.015 | -5.11 | 0.011 | -1.19 | 0.204 | -1.78 | 0.034 | -1.69 | 0.021 |
| 1439635_at   | regulator of G-protein signaling 9                                                | Rgs9              | 1.33  | 0.886 | 1.21  | 0.017 | 2.39  | 0.248 | -1.14 | 0.228 | -1.69 | 0.019 |
| 1423186_at   | T-cell lymphoma invasion and metastasis 2                                         | Tiam2             | 1.52  | 0.298 | 1.06  | 0.614 | -1.28 | 0.052 | -1.45 | 0.013 | -1.69 | 0.001 |
| 1448611_at   | WW, C2 and coiled-coil domain containing 2                                        | Wwc2              | -1    | 0.839 | -1.42 | 0.007 | -1.31 | 0.031 | -1.63 | 0.031 | -1.69 | 0.031 |
| 1443720_s_at | bone morphogenetic protein receptor, type 1B                                      | Bmpr1b            | -1.05 | 0.476 | -1.91 | 0.100 | -1.27 | 0.122 | -1.41 | 0.213 | -1.68 | 0.014 |
| 1441637_at   | RIKEN cDNA F730047E07 gene                                                        | F730047E07Rik     | 1     | 0.660 | -1.22 | 0.258 | -1.32 | 0.138 | 1.57  | 0.424 | -1.68 | 0.034 |
| 1435461_at   | membrane associated guanylate kinase, WW and PDZ domain containing                | Magi3             | -1.16 | 0.207 | -3.3  | 0.018 | -1.37 | 0.020 | -1.46 | 0.094 | -1.68 | 0.004 |
| 1437735_at   | protein phosphatase 1, regulatory (inhibitor) subunit 12A                         | Ppp1r12a          | -1.16 | 0.388 | -1.53 | 0.127 | -1.42 | 0.038 | -1.69 | 0.015 | -1.68 | 0.006 |
| 1435028_at   | WD repeat domain 7                                                                | Wdr7              | -1.17 | 0.172 | -2.29 | 0.008 | -1.39 | 0.055 | -1.49 | 0.014 | -1.68 | 0.007 |
| 1456771_at   | zyg-11 homolog B (C. elegans)-like                                                | Zyg11b1           | 2.09  | 0.740 | 2.18  | 0.538 | -1.01 | 0.470 | -1.16 | 0.776 | -1.68 | 0.001 |
| 1454723_at   | RIKEN cDNA 1110033M05 gene                                                        | 1110033M05Rik     | 1.06  | 0.927 | -1.57 | 0.007 | -1.53 | 0.004 | -1.38 | 0.011 | -1.67 | 0.003 |
| 1430675_at   | RIKEN cDNA 2900055J20 gene                                                        | 2900055J20Rik     | -1.55 | 0.053 | -1.74 | 0.193 | 1.19  | 0.426 | 2.15  | 0.392 | -1.67 | 0.048 |
| 1436143_at   | RIKEN cDNA 4933425L03 gene                                                        | 4933425L03Rik     | -1.28 | 0.050 | -1.93 | 0.063 | -1.57 | 0.004 | -1.42 | 0.024 | -1.67 | 0.025 |
| 1434769_at   | BTB (POZ) domain containing 9                                                     | Btbd9             | -1.34 | 0.267 | -2.53 | 0.139 | -1.32 | 0.049 | -1.95 | 0.022 | -1.67 | 0.034 |
| 1427479_at   | eukaryotic translation initiation factor 1A /// similar to Eukaryotic translation | Eif1a /// MGC1075 | 1.87  | 0.102 | 1.43  | 0.639 | -1.37 | 0.062 | 4.54  | 0.361 | -1.67 | 0.004 |
| 1458039_at   | Nuclear receptor coactivator 3                                                    | Ncoa3             | 1.61  | 0.329 | 1.07  | 0.896 | 1.17  | 0.727 | 1.15  | 0.760 | -1.67 | 0.008 |
| 1420558_at   | selectin, platelet                                                                | Selp              | 1.03  | 0.954 | 1.18  | 0.626 | -1.01 | 0.308 | -1.07 | 0.828 | -1.67 | 0.025 |
| 1434406_at   | SLIT-ROBO Rho GTPase activating protein 2                                         | Srgap2            | -1.24 | 0.295 | -2.21 | 0.074 | -1.42 | 0.003 | -1.78 | 0.001 | -1.67 | 0.008 |
| 1430853_a_at | RIKEN cDNA 3110045G13 gene                                                        | 3110045G13Rik     | 1.37  | 0.216 | 1.09  | 0.674 | 2.74  | 0.061 | 4.23  | 0.330 | -1.66 | 0.046 |
| 1438730_at   | cDNA sequence BC028801                                                            | BC028801          | -1.18 | 0.257 | -3.23 | 0.032 | -1.51 | 0.152 | -1.37 | 0.056 | -1.66 | 0.040 |
| 1450005_x_at | EGF-like-domain, multiple 9                                                       | Egfl9             | 1.06  | 0.589 | 1.55  | 0.474 | 1.09  | 0.913 | 1.15  | 0.784 | -1.66 | 0.044 |
| 1442756_at   | Linker of T-cell receptor pathways                                                | Lnk               | 1.79  | 0.981 | 2.22  | 0.701 | -1.38 | 0.240 | 1.33  | 0.270 | -1.66 | 0.017 |
| 1441297_at   | mucin 6, gastric                                                                  | Muc6              | 1.86  | 0.952 | 1.17  | 0.745 | -1.57 | 0.216 | 1.55  | 0.475 | -1.66 | 0.025 |
| 1460615_at   | 5'-nucleotidase domain containing 1                                               | Nt5dc1            | 1     | 0.918 | -1.66 | 0.006 | -1.19 | 0.023 | -1.37 | 0.023 | -1.66 | 0.014 |
| 1435879_at   | thymoma viral proto-oncogene 3                                                    | Akt3              | -1.12 | 0.272 | -2.7  | 0.030 | -1.51 | 0.004 | -1.37 | 0.010 | -1.65 | 0.005 |
| 1435480_at   | Braf transforming gene                                                            | Braf              | -1.02 | 0.889 | -1.46 | 0.026 | -1.22 | 0.163 | -1.2  | 0.133 | -1.65 | 0.031 |
| 1440543_at   | RIKEN cDNA D930036F22 gene                                                        | D930036F22Rik     | -1.08 | 0.415 | -1.18 | 0.445 | 1.04  | 0.707 | 1.07  | 0.418 | -1.65 | 0.034 |
| 1455244_at   | dishevelled associated activator of morphogenesis 1                               | Daam1             | 1.25  | 0.378 | -1.32 | 0.171 | -1.37 | 0.015 | -1.65 | 0.002 | -1.65 | 0.000 |
| 1452280_at   | FERM, RhoGEF (Arhgef) and pleckstrin domain protein 1 (chondrocyte-de             | Farp1             | 1.44  | 0.705 | -1.2  | 0.200 | -1.3  | 0.019 | -1.44 | 0.000 | -1.65 | 0.000 |
| 1457374_at   | neural precursor cell expressed, developmentally down-regulated gene 4-l          | Nedd4l            | -1.07 | 0.387 | -1.8  | 0.089 | -1.13 | 0.418 | -1.04 | 0.637 | -1.65 | 0.039 |
| 1456303_at   | PHD finger protein 14                                                             | Phf14             | -1    | 0.759 | -1    | 0.954 | -1.28 | 0.034 | 1.12  | 0.990 | -1.65 | 0.043 |
| 1453286_at   | plexin A2                                                                         | Plxna2            | -1.08 | 0.544 | -4.11 | 0.016 | -1.17 | 0.129 | -1.37 | 0.144 | -1.65 | 0.002 |
| 1424704_at   | runt related transcription factor 2                                               | Runx2             | -1.11 | 0.370 | -1.67 | 0.017 | -1.44 | 0.001 | -1.67 | 0.007 | -1.65 | 0.016 |
| 1439857_at   | Ubiquitin specific peptidase 32                                                   | Usp32             | -1.08 | 0.467 | -1.41 | 0.285 | 1.09  | 0.829 | -1.22 | 0.066 | -1.65 | 0.047 |
| 1430878_at   | RIKEN cDNA 2210406H18 gene                                                        | 2210406H18Rik     | 1.45  | 0.516 | -1.67 | 0.180 | -1.32 | 0.196 | -1.2  | 0.412 | -1.64 | 0.026 |
| 1453015_at   | RIKEN cDNA 5830471E12 gene                                                        | 5830471E12Rik     | -1.23 | 0.336 | -1.78 | 0.137 | -1.31 | 0.008 | -1.53 | 0.001 | -1.64 | 0.020 |
| 1460003_at   | expressed sequence AI956758                                                       | AI956758          | 1.14  | 0.990 | -1.69 | 0.081 | -1.08 | 0.455 | -1.76 | 0.116 | -1.64 | 0.028 |

|              |                                                                            |                   |       |       |       |       |       |       |       |       |       |       |
|--------------|----------------------------------------------------------------------------|-------------------|-------|-------|-------|-------|-------|-------|-------|-------|-------|-------|
| 1434856_at   | ankyrin repeat domain 44                                                   | Ankrd44           | 1.15  | 0.495 | -2.6  | 0.061 | 1.02  | 0.616 | -1.66 | 0.011 | -1.64 | 0.041 |
| 1426951_at   | cysteine rich transmembrane BMP regulator 1 (chordin like)                 | Crim1             | -1.11 | 0.025 | -2.12 | 0.000 | -1.99 | 0.027 | -1.7  | 0.004 | -1.64 | 0.011 |
| 1456667_at   | Huntington disease gene homolog                                            | Hdh               | -1.07 | 0.501 | -1.27 | 0.081 | -1.43 | 0.109 | -1.36 | 0.214 | -1.64 | 0.026 |
| 1434563_at   | ribosomal protein S6 kinase polypeptide 1                                  | Rps6kc1           | 1     | 0.828 | -1    | 0.607 | -1.14 | 0.163 | -1.54 | 0.006 | -1.64 | 0.002 |
| 1447443_at   | Sparc/osteonectin, cwcv and kazal-like domains proteoglycan 2              | Spock2            | 1.89  | 0.940 | 1.64  | 0.835 | -1.2  | 0.311 | -1.51 | 0.172 | -1.64 | 0.040 |
| 1450038_s_at | ubiquitin specific peptidase 9, X chromosome                               | Usp9x             | 2.99  | 0.333 | 1.83  | 0.437 | -1.29 | 0.102 | 1.13  | 0.375 | -1.64 | 0.004 |
| 1458142_at   | zinc finger, DHHC domain containing 9                                      | Zdhhc9            | -1.64 | 0.061 | -1.54 | 0.086 | -1.18 | 0.069 | 1.35  | 0.904 | -1.64 | 0.012 |
| 1428493_at   | RIKEN cDNA 2610511M17 gene /// similar to signal-induced proliferation-z   | 2610511M17Rik /// | -1.17 | 0.275 | -1.74 | 0.005 | -1.4  | 0.047 | -1.8  | 0.005 | -1.63 | 0.000 |
| 1446244_at   | RIKEN cDNA 2810482G21 gene                                                 | 2810482G21Rik     | 1.99  | 0.746 | 1.8   | 0.612 | 2.38  | 0.077 | 1.15  | 0.446 | -1.63 | 0.002 |
| 1427016_at   | RIKEN cDNA 4932438A13 gene /// similar to CG4841-PA                        | 4932438A13Rik /// | -1.49 | 0.016 | -1.91 | 0.029 | -1.19 | 0.136 | -1.22 | 0.270 | -1.63 | 0.031 |
| 1427043_s_at | cytosolic ovarian carcinoma antigen 1                                      | Cova1             | -1.41 | 0.049 | -2.99 | 0.005 | -1.37 | 0.065 | -1.69 | 0.008 | -1.63 | 0.041 |
| 1455827_at   | muscleblind-like 2                                                         | Mbnl2             | 1.45  | 0.445 | -1.01 | 0.501 | -1.47 | 0.012 | -1.27 | 0.001 | -1.63 | 0.019 |
| 1418594_a_at | nuclear receptor coactivator 1                                             | Ncoa1             | -1.11 | 0.410 | -2.39 | 0.051 | -1.23 | 0.026 | -1.24 | 0.028 | -1.63 | 0.009 |
| 1422894_at   | Scm-like with four mbt domains 1                                           | Sfmbt1            | 2.35  | 0.082 | 2.1   | 0.651 | -1.03 | 0.686 | -1.05 | 0.640 | -1.63 | 0.024 |
| 1451055_at   | solute carrier family 45, member 2                                         | Slc45a2           | -1.21 | 0.303 | 1.17  | 0.725 | 1.7   | 0.129 | 2.13  | 0.450 | -1.63 | 0.028 |
| 1419496_at   | solute carrier organic anion transporter family, member 1a6                | Slco1a6           | 2.34  | 0.752 | -1.48 | 0.167 | -1.09 | 0.413 | 2.36  | 0.946 | -1.63 | 0.033 |
| 1435065_x_at | Vav2 oncogene                                                              | Vav2              | 1.15  | 0.992 | -1.13 | 0.453 | -1.45 | 0.079 | 1.32  | 0.907 | -1.63 | 0.010 |
| 1420328_at   | RIKEN cDNA 2210417D09 gene                                                 | 2210417D09Rik     | 1.09  | 0.943 | 1.07  | 0.731 | -1.14 | 0.273 | -1.09 | 0.437 | -1.62 | 0.047 |
| 1455802_x_at | anterior gradient 2 (Xenopus laevis)                                       | Agr2              | 1.57  | 0.671 | 1.51  | 0.913 | 1.33  | 0.937 | 1.88  | 0.214 | -1.62 | 0.040 |
| 1457069_at   | activating signal cointegrator 1 complex subunit 3                         | Ascc3             | -1.11 | 0.467 | -2.11 | 0.148 | -1.42 | 0.084 | -1.5  | 0.016 | -1.62 | 0.047 |
| 1451440_at   | chondrolectin                                                              | Chodl             | 1.38  | 0.822 | 1.59  | 0.528 | 1.59  | 0.693 | 1.38  | 0.335 | -1.62 | 0.050 |
| 1434370_s_at | Fas-associated factor 1                                                    | Faf1              | 3.07  | 0.347 | 1.66  | 0.363 | -1.3  | 0.108 | -1.26 | 0.078 | -1.62 | 0.031 |
| 1443185_at   | lipoma HMGIC fusion partner-like 2                                         | Lhfp12            | -1.08 | 0.503 | -1.15 | 0.449 | -1.26 | 0.297 | 1.31  | 0.478 | -1.62 | 0.001 |
| 1446421_at   | Schwannomin interacting protein 1                                          | Schip1            | -1.18 | 0.324 | -1.05 | 0.967 | -1.36 | 0.078 | -1.45 | 0.104 | -1.62 | 0.008 |
| 1456153_at   | slingshot homolog 2 (Drosophila)                                           | Ssh2              | 1.21  | 0.251 | -1.46 | 0.012 | -1.3  | 0.002 | -1.26 | 0.087 | -1.62 | 0.007 |
| 1452244_at   | RIKEN cDNA 6330406115 gene                                                 | 6330406115Rik     | 1.2   | 0.638 | 1.03  | 0.731 | -1.53 | 0.068 | -1.75 | 0.010 | -1.61 | 0.006 |
| 1443986_at   | Vcell division cycle 73, Paf1/RNA polymerase II complex component, hom     | Cdc73             | 1.41  | 0.545 | 1.16  | 0.708 | -1.38 | 0.035 | -1.11 | 0.300 | -1.61 | 0.003 |
| 1455164_at   | Cdc42 GTPase-activating protein                                            | Cdgap             | 1.07  | 0.324 | -1.29 | 0.083 | -1.43 | 0.014 | -1.37 | 0.001 | -1.61 | 0.001 |
| 1452291_at   | centaurin, delta 1                                                         | Centd1            | 1.18  | 0.806 | 1.01  | 0.711 | -1.06 | 0.513 | -1.41 | 0.042 | -1.61 | 0.015 |
| 1457222_at   | cAMP responsive element binding protein 5                                  | Creb5             | 1.32  | 0.851 | 1.19  | 0.645 | -1.35 | 0.152 | -1.74 | 0.038 | -1.61 | 0.027 |
| 1452220_at   | dedicator of cyto-kinesis 1                                                | Dock1             | -1    | 0.781 | -1.98 | 0.022 | -1.39 | 0.024 | -1.36 | 0.017 | -1.61 | 0.008 |
| 1455375_at   | similar to Protein enabled homolog (NPC-derived proline-rich protein 1) (N | LOC669787         | 1.04  | 0.712 | -2.01 | 0.091 | -1.06 | 0.335 | -1.17 | 0.289 | -1.61 | 0.012 |
| 1441316_at   | similar to wingless related MMTV integration site 8b                       | LOC677060         | -1.2  | 0.328 | -1.37 | 0.169 | 2.19  | 0.469 | 2.25  | 0.864 | -1.61 | 0.049 |
| 1432177_a_at | menage a trois 1                                                           | Mnat1             | 1.11  | 0.613 | -1.31 | 0.082 | -1.29 | 0.024 | -1.49 | 0.022 | -1.61 | 0.003 |
| 1440414_at   | metal response element binding transcription factor 1                      | Mtf1              | 1.99  | 0.132 | 1.28  | 0.095 | -1.5  | 0.078 | 1.16  | 0.681 | -1.61 | 0.018 |
| 1452788_at   | protein phosphatase 2, regulatory subunit B (B56), epsilon isoform         | Ppp2r5e           | 3.82  | 0.240 | 3.44  | 0.799 | -1.32 | 0.049 | -1.36 | 0.045 | -1.61 | 0.012 |
| 1447610_at   | transmembrane protein 34                                                   | Tmem34            | -1.09 | 0.408 | 1.4   | 0.689 | -1.32 | 0.386 | 1.41  | 0.411 | -1.61 | 0.030 |
| 1442121_at   | cyclic AMP-regulated phosphoprotein, 21                                    | Arpp21            | 1.37  | 0.706 | 2.16  | 0.068 | 1.23  | 0.998 | 1.54  | 0.933 | -1.6  | 0.016 |
| 1438750_at   | Alpha thalassemia/mental retardation syndrome X-linked homolog (human      | Atrx              | -1.13 | 0.092 | -1.08 | 0.557 | -1.27 | 0.186 | -1.27 | 0.090 | -1.6  | 0.006 |
| 1433643_at   | calcium channel, voltage-dependent, alpha2/delta subunit 1                 | Cacna2d1          | 1.1   | 0.731 | -1.6  | 0.041 | -1.13 | 0.065 | -1.05 | 0.559 | -1.6  | 0.003 |
| 1441165_s_at | calsynenin 2                                                               | Clstn2            | 1.52  | 0.959 | 1.26  | 0.935 | -1.35 | 0.320 | 1.62  | 0.980 | -1.6  | 0.012 |
| 1419538_at   | FMS-like tyrosine kinase 3                                                 | Flt3              | 1.31  | 0.726 | -1.62 | 0.151 | -1.67 | 0.230 | 1.8   | 0.913 | -1.6  | 0.028 |
| 1436827_at   | gene model 944, (NCBI)                                                     | Gm944             | -1.06 | 0.498 | -2.23 | 0.038 | -1.31 | 0.053 | -1.13 | 0.320 | -1.6  | 0.007 |
| 1434290_at   | glycosyltransferase-like domain containing 1                               | Gtdc1             | -1.3  | 0.199 | -2.16 | 0.048 | -1.57 | 0.046 | -1.58 | 0.107 | -1.6  | 0.005 |
| 1421905_at   | nuclear receptor coactivator 6 interacting protein                         | Ncoa6ip           | 1.41  | 0.898 | 2.01  | 0.621 | 1.18  | 0.667 | 1.16  | 0.701 | -1.6  | 0.021 |
| 1417626_at   | phosphodiesterase 4D interacting protein (myomegalin)                      | Pde4dip           | -1.02 | 0.713 | -1.72 | 0.005 | -1.42 | 0.003 | -1.48 | 0.000 | -1.6  | 0.007 |
| 1452209_at   | plakophilin 4                                                              | Pkp4              | -1.24 | 0.238 | -2.01 | 0.027 | -1.41 | 0.009 | -1.6  | 0.000 | -1.6  | 0.004 |
| 1437397_at   | prolactin receptor                                                         | Prlr              | 1.64  | 0.004 | 1.43  | 0.313 | 1.5   | 0.952 | -1.05 | 0.296 | -1.6  | 0.048 |
| 1451041_at   | Rho-associated coiled-coil containing protein kinase 2                     | Rock2             | 1.25  | 0.474 | -1.39 | 0.145 | -1.5  | 0.010 | -1.27 | 0.009 | -1.6  | 0.014 |
| 1419550_a_at | serine/threonine kinase 39, STE20/SPS1 homolog (yeast)                     | Stk39             | -1.1  | 0.297 | -1.94 | 0.015 | -1.43 | 0.034 | -1.44 | 0.003 | -1.6  | 0.014 |
| 1435700_at   | talin 2                                                                    | Tln2              | -1.04 | 0.562 | -1.59 | 0.092 | -1.45 | 0.017 | -1.38 | 0.086 | -1.6  | 0.024 |
| 1455764_at   | RIKEN cDNA B930007L02 gene                                                 | B930007L02Rik     | 1.73  | 0.525 | 1.9   | 0.291 | -1.64 | 0.104 | 1.15  | 0.750 | -1.59 | 0.028 |
| 1438045_at   | early endosome antigen 1                                                   | Eea1              | 1.27  | 0.275 | -1.34 | 0.109 | -1.29 | 0.027 | -1.24 | 0.012 | -1.59 | 0.038 |
| 1421053_at   | kinesin family member 1A                                                   | Kif1a             | 1.73  | 0.676 | 1.4   | 0.909 | -1.15 | 0.255 | 1     | 0.839 | -1.59 | 0.020 |
| 1434674_at   | lysosomal trafficking regulator                                            | Lyst              | 1.54  | 0.537 | -1.59 | 0.107 | -1.29 | 0.034 | -1.38 | 0.063 | -1.59 | 0.012 |
| 1437158_at   | Nipped-B homolog (Drosophila)                                              | Nipbl             | -1.15 | 0.389 | -1.57 | 0.096 | -1.33 | 0.049 | -1.32 | 0.046 | -1.59 | 0.046 |
| 1451474_a_at | poly (ADP-ribose) polymerase family, member 8                              | Parp8             | 1.15  | 0.213 | -1.22 | 0.210 | -1.55 | 0.006 | -1.53 | 0.001 | -1.59 | 0.005 |
| 1440878_at   | runt related transcription factor 1                                        | Runx1             | -1.18 | 0.261 | -1.22 | 0.180 | -1.1  | 0.536 | -1.25 | 0.061 | -1.59 | 0.014 |

|              |                                                                           |                   |       |       |       |       |       |       |       |       |       |       |
|--------------|---------------------------------------------------------------------------|-------------------|-------|-------|-------|-------|-------|-------|-------|-------|-------|-------|
| 1430797_at   | exportin 4                                                                | Xpo4              | 2.2   | 0.140 | 2.54  | 0.014 | 1.4   | 0.823 | -2.25 | 0.028 | -1.59 | 0.048 |
| 1424602_s_at | X-ray repair complementing defective repair in Chinese hamster cells 4    | Xrcc4             | -1.26 | 0.129 | -1.9  | 0.030 | -1.35 | 0.115 | -1.22 | 0.050 | -1.59 | 0.018 |
| 1443453_at   | zinc finger protein 651                                                   | Zfp651            | -1.12 | 0.493 | 1.43  | 0.287 | -1.04 | 0.527 | -1.2  | 0.309 | -1.59 | 0.049 |
| 1431800_at   | RIKEN cDNA 1300010F03 gene                                                | 1300010F03Rik     | 1.6   | 0.040 | -1.09 | 0.660 | 2     | 0.050 | 1     | 0.564 | -1.58 | 0.010 |
| 1458386_at   | RIKEN cDNA C030009J22 gene                                                | C030009J22Rik     | -1.23 | 0.427 | -1.47 | 0.149 | 2.02  | 0.830 | 1.23  | 0.726 | -1.58 | 0.006 |
| 1452413_at   | RIKEN cDNA C230081A13 gene                                                | C230081A13Rik     | 2.41  | 0.236 | 1.82  | 0.931 | -1.08 | 0.397 | -1.25 | 0.117 | -1.58 | 0.034 |
| 1445090_at   | Glutamate receptor, ionotropic, kainate 2 (beta 2)                        | Grik2             | 1.73  | 0.173 | 2.68  | 0.314 | 2.92  | 0.251 | 1.89  | 0.813 | -1.58 | 0.048 |
| 1451023_at   | hyperpolarization-activated, cyclic nucleotide-gated K+ 3                 | Hcn3              | 1.07  | 0.749 | 1.11  | 0.975 | -1.49 | 0.119 | -1.3  | 0.110 | -1.58 | 0.028 |
| 1448050_s_at | mitogen-activated protein kinase kinase kinase 4                          | Map4k4            | -1.34 | 0.242 | -1.59 | 0.224 | -1.2  | 0.109 | -1.25 | 0.078 | -1.58 | 0.029 |
| 1439328_at   | nuclear factor of activated T-cells 5                                     | Nfat5             | 1.35  | 0.415 | 1.45  | 0.567 | 1     | 0.556 | -1.28 | 0.081 | -1.58 | 0.006 |
| 1435349_at   | neuropilin 2                                                              | Nrp2              | -1.16 | 0.184 | -2.35 | 0.024 | -1.34 | 0.119 | -1.45 | 0.010 | -1.58 | 0.001 |
| 1432592_at   | pregnancy-associated plasma protein A                                     | Pappa             | -1.12 | 0.352 | -1.62 | 0.022 | -1.72 | 0.052 | -1.34 | 0.015 | -1.58 | 0.006 |
| 1448065_at   | protoporphyrinogen oxidase                                                | Ppox              | 1.14  | 0.707 | 1.71  | 0.997 | 2.25  | 0.441 | 1.3   | 0.850 | -1.58 | 0.040 |
| 1434005_at   | RNA binding motif, single stranded interacting protein 1                  | Rbms1             | -1.01 | 0.888 | -1.53 | 0.001 | -1.37 | 0.002 | -1.49 | 0.003 | -1.58 | 0.005 |
| 1448639_a_at | spermatogenesis associated 5                                              | Spata5            | -1.23 | 0.262 | -1.19 | 0.268 | -1.35 | 0.013 | -1.46 | 0.005 | -1.58 | 0.001 |
| 1452274_at   | zinc finger, AN1-type domain 3                                            | Zfand3            | -1.12 | 0.345 | -1.63 | 0.103 | -1.58 | 0.011 | -1.42 | 0.002 | -1.58 | 0.004 |
| 1428220_at   | RIKEN cDNA 5730419I09 gene                                                | 5730419I09Rik     | 1.03  | 0.509 | -1.66 | 0.068 | -1.43 | 0.174 | 1.55  | 0.693 | -1.57 | 0.032 |
| 1452124_at   | ankyrin 3, epithelial /// RIKEN cDNA 2900054D09 gene                      | Ank3 /// 2900054D | -1.6  | 0.167 | -2.46 | 0.120 | -1.26 | 0.197 | -1.27 | 0.128 | -1.57 | 0.001 |
| 1433642_at   | ADP-ribosylation factor-like 15                                           | Arl15             | -1.31 | 0.059 | -3.42 | 0.013 | -1.21 | 0.196 | -1.53 | 0.009 | -1.57 | 0.021 |
| 1446730_at   | Expressed sequence C79267                                                 | C79267            | 1.37  | 0.836 | 1.62  | 0.583 | -1.06 | 0.449 | 1.12  | 0.833 | -1.57 | 0.004 |
| 1447084_at   | nuclear factor of activated T-cells, cytoplasmic, calcineurin-dependent 1 | Nfatc1            | -1.41 | 0.222 | -1.52 | 0.022 | -1.25 | 0.165 | 1.07  | 0.952 | -1.57 | 0.031 |
| 1419073_at   | transmembrane protein with EGF-like and two follistatin-like domains 2    | Tmeff2            | -1.14 | 0.194 | -2.11 | 0.017 | -1.34 | 0.023 | -1.21 | 0.080 | -1.57 | 0.001 |
| 1437556_at   | zinc finger homeodomain 4                                                 | Zfhx4             | 1.16  | 0.224 | -2.53 | 0.001 | -1.04 | 0.694 | -1.44 | 0.010 | -1.57 | 0.007 |
| 1441403_at   | RIKEN cDNA 6430501K19 gene                                                | 6430501K19Rik     | 1.08  | 0.963 | -1.02 | 0.478 | 1.66  | 0.110 | 1.11  | 0.961 | -1.56 | 0.003 |
| 1431995_at   | anthrax toxin receptor 1                                                  | Antxr1            | -1.24 | 0.275 | -1.63 | 0.060 | -1.07 | 0.494 | -1.05 | 0.690 | -1.56 | 0.047 |
| 1447928_at   | carbonic anhydrase 5b, mitochondrial                                      | Car5b             | 1.06  | 0.615 | -2.13 | 0.062 | 1.33  | 0.879 | 1.11  | 0.432 | -1.56 | 0.002 |
| 1420380_at   | chemokine (C-C motif) ligand 2                                            | Ccl2              | 1.21  | 0.920 | 1.13  | 0.461 | -1.34 | 0.021 | -1.14 | 0.131 | -1.56 | 0.019 |
| 1435155_at   | cingulin                                                                  | Cgn               | -2.14 | 0.001 | -1.51 | 0.138 | 1.05  | 0.730 | -1.11 | 0.619 | -1.56 | 0.032 |
| 1434917_at   | cordons-bleu                                                              | Cobl              | -1.09 | 0.319 | -1.14 | 0.242 | 1.09  | 0.480 | -1.28 | 0.018 | -1.56 | 0.016 |
| 1440642_at   | RIKEN cDNA D630042P16 gene                                                | D630042P16Rik     | 3.13  | 0.433 | 1.45  | 0.756 | 1.16  | 0.422 | 1.73  | 0.157 | -1.56 | 0.045 |
| 1454731_at   | myosin X                                                                  | Myo10             | 1.13  | 0.553 | -1.34 | 0.164 | -1.5  | 0.018 | -1.56 | 0.039 | -1.56 | 0.015 |
| 1440426_at   | nuclear factor of activated T-cells, cytoplasmic, calcineurin-dependent 2 | Nfatc2            | 2.74  | 0.124 | 2.72  | 0.345 | 1     | 0.890 | 1.38  | 0.110 | -1.56 | 0.005 |
| 1455042_at   | Transducin (beta)-like 1 X-linked                                         | Tbl1x             | 1.36  | 0.550 | -1.02 | 0.467 | -1.37 | 0.007 | -1.38 | 0.003 | -1.56 | 0.006 |
| 1458681_at   | Transmembrane 9 superfamily member 3                                      | Tm9sf3            | 1.19  | 0.475 | -1.1  | 0.420 | 1.27  | 0.895 | -1.35 | 0.115 | -1.56 | 0.043 |
| 1455309_at   | transmembrane protein 16F                                                 | Tmem16f           | 1.27  | 0.404 | -1.31 | 0.185 | -1.51 | 0.070 | -1.39 | 0.019 | -1.56 | 0.007 |
| 1431869_at   | RIKEN cDNA 5730419F03 gene                                                | 5730419F03Rik     | 1.2   | 0.529 | 1.76  | 0.937 | 2.75  | 0.009 | -1.26 | 0.164 | -1.55 | 0.011 |
| 1448460_at   | activin A receptor, type 1                                                | Acvr1             | 1.31  | 0.908 | 1.14  | 0.453 | -1.3  | 0.043 | -1.4  | 0.003 | -1.55 | 0.001 |
| 1427461_at   | cDNA sequence BC005561                                                    | BC005561          | 2.2   | 0.018 | 2.82  | 0.269 | -1.14 | 0.631 | -1.25 | 0.341 | -1.55 | 0.027 |
| 1450756_s_at | cullin 3                                                                  | Cul3              | 3.04  | 0.568 | 2.14  | 0.912 | -1.33 | 0.021 | -1.28 | 0.010 | -1.55 | 0.000 |
| 1434754_at   | GTPase activating RANGAP domain-like 4                                    | Garnl4            | -1.14 | 0.012 | -1.41 | 0.009 | -1.26 | 0.014 | -1.29 | 0.011 | -1.55 | 0.005 |
| 1439153_at   | IBR domain containing 2                                                   | Ibrdc2            | -1.1  | 0.337 | -1.06 | 0.603 | 1.4   | 0.001 | 1.08  | 0.730 | -1.55 | 0.008 |
| 1453578_at   | phosphotriesterase related                                                | Pter              | -1.11 | 0.383 | -2.51 | 0.136 | 1.04  | 0.957 | -1.1  | 0.251 | -1.55 | 0.020 |
| 1448046_at   | Rab9 effector protein with kelch motifs                                   | Rabepk            | 1.94  | 0.804 | 1.67  | 0.986 | 1.13  | 0.833 | -1.26 | 0.181 | -1.55 | 0.042 |
| 1443762_s_at | SET binding factor 2                                                      | Sbf2              | -1.32 | 0.225 | -2.23 | 0.049 | -1.33 | 0.004 | -1.53 | 0.004 | -1.55 | 0.007 |
| 1437197_at   | sorbin and SH3 domain containing 2                                        | Sorbs2            | 1.18  | 0.863 | -1.51 | 0.145 | -1.6  | 0.006 | -1.6  | 0.027 | -1.55 | 0.007 |
| 1452964_at   | tubulin tyrosine ligase-like family, member 11                            | Till11            | -1.15 | 0.202 | -1.93 | 0.021 | -1.29 | 0.046 | -1.32 | 0.017 | -1.55 | 0.032 |
| 1444717_at   | ZW10 interactor                                                           | Zwint             | 1.38  | 0.732 | 1.77  | 0.652 | -1.26 | 0.295 | -1.01 | 0.767 | -1.55 | 0.004 |
| 1418403_at   | a disintegrin and metallopeptidase domain 19 (meltrin beta)               | Adam19            | 6.69  | 0.600 | 3.65  | 0.660 | -1.41 | 0.006 | -1.28 | 0.023 | -1.54 | 0.010 |
| 1439501_at   | calcium binding atopy-related autoantigen 1                               | Cbara1            | 1.16  | 0.828 | 1.27  | 0.862 | -1.18 | 0.282 | -1.05 | 0.492 | -1.54 | 0.006 |
| 1447174_at   | Dachshund 1 (Drosophila)                                                  | Dach1             | -1.16 | 0.337 | 1.55  | 0.892 | 3.48  | 0.139 | 2.15  | 0.176 | -1.54 | 0.036 |
| 1429368_at   | leucine-rich repeats and immunoglobulin-like domains 3                    | Lrig3             | 1.28  | 0.232 | -1.2  | 0.261 | 1.23  | 0.581 | 1.17  | 0.991 | -1.54 | 0.037 |
| 1457632_s_at | myeloid ecotropic viral integration site-related gene 1                   | Mrg1              | -1.46 | 0.281 | -3.35 | 0.131 | -1.42 | 0.028 | -1.99 | 0.015 | -1.54 | 0.006 |
| 1439123_at   | PHD finger protein 21A                                                    | Phf21a            | -1.35 | 0.151 | 1.08  | 0.256 | 2.41  | 0.163 | 1.62  | 0.422 | -1.54 | 0.047 |
| 1424089_a_at | transcription factor 4                                                    | Tcf4              | 1.05  | 0.260 | -1.49 | 0.036 | -1.31 | 0.026 | -1.3  | 0.023 | -1.54 | 0.024 |
| 1429607_at   | trafficking protein, kinesin binding 2                                    | Trak2             | 1.37  | 0.434 | 1.45  | 0.885 | -1.04 | 0.582 | 1.04  | 0.641 | -1.54 | 0.017 |
| 1455709_at   | RIKEN cDNA 4930422I22 gene                                                | 4930422I22Rik     | 1.32  | 0.843 | 1.33  | 0.690 | -1.57 | 0.239 | -1.75 | 0.031 | -1.53 | 0.028 |
| 1432325_at   | RIKEN cDNA 4930502M04 gene                                                | 4930502M04Rik     | -1.39 | 0.358 | -1.26 | 0.380 | -1.5  | 0.109 | 1.1   | 0.626 | -1.53 | 0.017 |
| 1421172_at   | a disintegrin and metallopeptidase domain 12 (meltrin alpha)              | Adam12            | 1.01  | 0.686 | -1.48 | 0.109 | -1.38 | 0.024 | -1.23 | 0.050 | -1.53 | 0.001 |



|              |                                                                                                 |                   |       |       |       |       |       |       |       |       |       |       |
|--------------|-------------------------------------------------------------------------------------------------|-------------------|-------|-------|-------|-------|-------|-------|-------|-------|-------|-------|
| 1455396_at   | ATPase, class I, type 8B, member 1                                                              | Atp8b1            | 1.26  | 0.705 | -1.8  | 0.073 | -1.5  | 0.002 | -1.57 | 0.012 | -1.53 | 0.025 |
| 1427488_a_at | baculoviral IAP repeat-containing 6                                                             | Birc6             | 1.04  | 0.600 | 1.03  | 0.687 | -1.1  | 0.625 | -1.49 | 0.011 | -1.53 | 0.001 |
| 1417067_s_at | chaperone, ABC1 activity of bc1 complex like (S. pombe)                                         | Cabc1             | 1.18  | 0.584 | -1.8  | 0.232 | 1.4   | 0.651 | -1.31 | 0.188 | -1.53 | 0.016 |
| 1418659_at   | circadian locomoter output cycles kaput                                                         | Clock             | -1.01 | 0.769 | -1.28 | 0.024 | -1.2  | 0.137 | -1.16 | 0.160 | -1.53 | 0.032 |
| 1422944_a_at | diaphanous homolog 3 (Drosophila)                                                               | Diap3             | -1.46 | 0.136 | -2.67 | 0.017 | -1.86 | 0.010 | -1.51 | 0.109 | -1.53 | 0.041 |
| 1441630_at   | E1A binding protein p400                                                                        | Ep400             | 1.29  | 0.413 | 1.16  | 0.821 | 1.45  | 0.073 | -1.45 | 0.243 | -1.53 | 0.036 |
| 1417568_at   | neurocalcin delta                                                                               | Ncald             | -1.05 | 0.723 | 1.17  | 0.555 | 1.04  | 0.828 | -1.22 | 0.289 | -1.53 | 0.033 |
| 1442603_at   | Polybromo 1                                                                                     | Pb1               | 2.55  | 0.020 | 2.99  | 0.036 | -1.33 | 0.259 | -1.11 | 0.598 | -1.53 | 0.028 |
| 1429770_at   | protein geranylgeranyltransferase type I, beta subunit                                          | Pggt1b            | 2.52  | 0.757 | 2.93  | 0.801 | 1.24  | 0.256 | 1.08  | 0.819 | -1.53 | 0.031 |
| 1422673_at   | protein kinase C, mu                                                                            | Prkcm             | -1.38 | 0.174 | -2.74 | 0.022 | -1.27 | 0.036 | -1.55 | 0.003 | -1.53 | 0.045 |
| 1450117_at   | transcription factor 3                                                                          | Tcf3              | -1.23 | 0.318 | -1.51 | 0.155 | 1.03  | 0.879 | -1.41 | 0.019 | -1.53 | 0.016 |
| 1420753_at   | tolloid-like                                                                                    | Tll1              | 1.16  | 0.742 | -1.38 | 0.149 | 1.12  | 0.629 | -1.15 | 0.329 | -1.53 | 0.018 |
| 1422932_a_at | vav 1 oncogene                                                                                  | Vav1              | 2.2   | 0.126 | 1.72  | 0.283 | 1.05  | 0.406 | 2.17  | 0.737 | -1.53 | 0.048 |
| 1443916_at   | RIKEN cDNA 2900026A02 gene                                                                      | 2900026A02Rik     | -1.31 | 0.007 | -2.11 | 0.000 | -1.07 | 0.428 | -1.05 | 0.602 | -1.52 | 0.015 |
| 1451923_at   | RIKEN cDNA 3222401M22 gene                                                                      | 3222401M22Rik     | -2.09 | 0.078 | 1.12  | 0.778 | -2.72 | 0.052 | -3.08 | 0.087 | -1.52 | 0.028 |
| 1439895_at   | expressed sequence AU021025                                                                     | AU021025          | 1.26  | 0.805 | 1.11  | 0.944 | -1.17 | 0.351 | 1.36  | 0.184 | -1.52 | 0.034 |
| 1429330_at   | gamma-aminobutyric acid (GABA-A) receptor, subunit alpha 4                                      | Gabra4            | 1.57  | 0.945 | 1.41  | 0.762 | 1.57  | 0.901 | 1.15  | 0.743 | -1.52 | 0.047 |
| 1433891_at   | leucine-rich repeat-containing G protein-coupled receptor 4 /// similar to Le Lgr4 /// LOC66958 | Lgr4              | 1.15  | 0.218 | -1.34 | 0.086 | -1.08 | 0.574 | -1.17 | 0.181 | -1.52 | 0.007 |
| 1453759_at   | NOL1/NOP2/Sun domain family 2                                                                   | Nsun2             | 2.12  | 0.249 | 2.4   | 0.153 | -1.27 | 0.344 | 1.44  | 0.599 | -1.52 | 0.022 |
| 1457465_at   | shroom family member 4                                                                          | Shroom4           | -1.04 | 0.665 | -1.26 | 0.060 | -1.34 | 0.060 | -1.9  | 0.003 | -1.52 | 0.012 |
| 1452604_at   | serologically defined colon cancer antigen 13                                                   | Stard13           | 1.63  | 0.499 | 1.52  | 0.528 | -1.31 | 0.030 | -1.32 | 0.029 | -1.52 | 0.014 |
| 1459770_at   | TAO kinase 1                                                                                    | Taok1             | -1.04 | 0.583 | 1.73  | 0.362 | 1.12  | 0.443 | 1.86  | 0.386 | -1.52 | 0.040 |
| 1433460_at   | tetratricopeptide repeat domain 7B                                                              | Ttc7b             | 1.73  | 0.492 | -1.04 | 0.307 | -1.37 | 0.006 | -1.44 | 0.002 | -1.52 | 0.024 |
| 1437542_at   | RIKEN cDNA A730095J18Rik                                                                        | A730095J18Rik     | -1.01 | 0.715 | -2.51 | 0.203 | -1.08 | 0.350 | -1.52 | 0.008 | -1.51 | 0.043 |
| 1446566_at   | Adaptor-related protein complex 2, beta 1 subunit                                               | Ap2b1             | -1.17 | 0.464 | -1.35 | 0.363 | 1.06  | 0.950 | -1.33 | 0.164 | -1.51 | 0.027 |
| 1424842_a_at | Rho GTPase activating protein 24                                                                | Arhgap24          | 1.1   | 0.360 | -1.17 | 0.214 | -1.2  | 0.129 | -1.4  | 0.017 | -1.51 | 0.033 |
| 1436498_at   | ariadne ubiquitin-conjugating enzyme E2 binding protein homolog 1 (Dros)                        | Arih1             | 1.44  | 0.410 | 1.05  | 0.737 | -1.35 | 0.007 | -1.2  | 0.046 | -1.51 | 0.018 |
| 1449709_s_at | arginine-tRNA-protein transferase 1                                                             | Ate1              | 1.07  | 0.569 | -1.22 | 0.145 | -1.29 | 0.031 | -1.33 | 0.026 | -1.51 | 0.004 |
| 1453372_at   | DnaJ (Hsp40) homolog, subfamily C, member 1                                                     | Dnajc1            | 1.05  | 0.384 | -1.35 | 0.013 | -1.38 | 0.031 | -1.2  | 0.010 | -1.51 | 0.009 |
| 1442909_at   | Potassium voltage-gated channel, subfamily Q, member 4                                          | Kcnq4             | 1.16  | 0.741 | 1.43  | 0.296 | -1.24 | 0.425 | 1.41  | 0.906 | -1.51 | 0.046 |
| 1449439_at   | Kruppel-like factor 7 (ubiquitous)                                                              | Klf7              | -1.11 | 0.187 | -1.5  | 0.041 | -1.47 | 0.008 | -1.51 | 0.026 | -1.51 | 0.046 |
| 1452833_at   | Rap guanine nucleotide exchange factor (GEF) 2                                                  | Rapgef2           | 1.09  | 0.423 | -1.19 | 0.211 | -1.24 | 0.029 | -1.62 | 0.000 | -1.51 | 0.011 |
| 1457097_at   | src family associated phosphoprotein 2                                                          | Scap2             | -1.37 | 0.216 | -1.41 | 0.025 | -1.06 | 0.618 | -1.1  | 0.495 | -1.51 | 0.044 |
| 1439515_at   | SET domain containing 5                                                                         | Setd5             | 1.14  | 0.469 | -1.3  | 0.053 | -1.4  | 0.014 | -1.35 | 0.025 | -1.51 | 0.037 |
| 1455493_at   | synaptic nuclear envelope 1                                                                     | Syne1             | -1.16 | 0.375 | -2.54 | 0.079 | -1.32 | 0.039 | -1.19 | 0.136 | -1.51 | 0.018 |
| 1418057_at   | T-cell lymphoma invasion and metastasis 1                                                       | Tiam1             | -1.28 | 0.188 | -2.08 | 0.033 | -1.3  | 0.024 | -1.19 | 0.362 | -1.51 | 0.048 |
| 1449431_at   | transient receptor potential cation channel, subfamily C, member 6                              | Trpc6             | 1.06  | 0.811 | -1.93 | 0.045 | 1.69  | 0.913 | -1.35 | 0.091 | -1.51 | 0.006 |
| 1455732_at   | RIKEN cDNA 1700025G04 gene                                                                      | 1700025G04Rik     | -1.08 | 0.148 | -2.2  | 0.012 | -1.16 | 0.020 | -1.3  | 0.045 | -1.5  | 0.016 |
| 1441059_at   | RIKEN cDNA 1700049G17 gene                                                                      | 1700049G17Rik     | 1.26  | 0.966 | 1.24  | 0.939 | -1.32 | 0.164 | -1    | 0.727 | -1.5  | 0.022 |
| 1454878_at   | RIKEN cDNA 2310047C04 gene                                                                      | 2310047C04Rik     | -1.18 | 0.410 | -1.71 | 0.159 | -1.21 | 0.003 | -1.3  | 0.119 | -1.5  | 0.040 |
| 1429215_at   | RIKEN cDNA 2310058N22 gene                                                                      | 2310058N22Rik     | 1.13  | 0.876 | 1.25  | 0.860 | -1.21 | 0.335 | -1.07 | 0.722 | -1.5  | 0.007 |
| 1453174_at   | RIKEN cDNA 2310076G13 gene                                                                      | 2310076G13Rik     | -1    | 0.844 | -1.51 | 0.000 | -1.27 | 0.107 | -1.27 | 0.057 | -1.5  | 0.039 |
| 1433722_at   | A kinase (PRKA) anchor protein 13                                                               | Akap13            | 1.01  | 0.771 | -1.11 | 0.396 | -1.29 | 0.049 | -1.4  | 0.025 | -1.5  | 0.003 |
| 1449244_at   | cadherin 2                                                                                      | Cdh2              | 1     | 0.807 | -1.33 | 0.020 | -1.37 | 0.040 | -1.18 | 0.146 | -1.5  | 0.002 |
| 1445940_at   | DNA segment, Chr 4, ERATO Doi 298, expressed                                                    | D4Erd298e         | 1.16  | 0.591 | -1.25 | 0.228 | 2.08  | 0.161 | -1.18 | 0.395 | -1.5  | 0.038 |
| 1425574_at   | Eph receptor A3                                                                                 | Epha3             | 3.47  | 0.615 | -1.13 | 0.357 | -1.69 | 0.072 | 1.59  | 0.463 | -1.5  | 0.038 |
| 1448989_a_at | myosin IB                                                                                       | Myo1b             | 1.07  | 0.968 | -1.39 | 0.071 | -1.29 | 0.029 | -1.34 | 0.005 | -1.5  | 0.000 |
| 1455181_at   | RAS p21 protein activator 2                                                                     | Rasa2             | -1.01 | 0.704 | -1.38 | 0.135 | -1.29 | 0.032 | -1.4  | 0.020 | -1.5  | 0.020 |
| 1454293_at   | retinoblastoma-like 1 (p107)                                                                    | Rbl1              | -1.25 | 0.365 | 1.43  | 0.950 | 2.03  | 0.818 | -1.49 | 0.118 | -1.5  | 0.048 |
| 1429111_at   | talin 2 /// similar to talin 2                                                                  | Tln2 /// LOC63921 | -1.2  | 0.033 | -1.68 | 0.002 | -1.46 | 0.005 | -1.41 | 0.006 | -1.5  | 0.005 |
| 1420339_at   | RIKEN cDNA 0610016J10 gene                                                                      | 0610016J10Rik     | -1.04 | 0.706 | -1.54 | 0.003 | -1.39 | 0.006 | -1.18 | 0.024 | -1.49 | 0.010 |
| 1456045_at   | RIKEN cDNA 1700106N22 gene                                                                      | 1700106N22Rik     | -1.65 | 0.139 | -2.12 | 0.044 | -1.64 | 0.004 | -1.03 | 0.662 | -1.49 | 0.044 |
| 1458376_at   | RIKEN cDNA B930025B16 gene                                                                      | B930025B16Rik     | 1.05  | 0.655 | 1.01  | 0.972 | -1.13 | 0.246 | -1.03 | 0.679 | -1.49 | 0.013 |
| 1460439_at   | cDNA sequence BC033915                                                                          | BC033915          | -1.07 | 0.605 | -1.95 | 0.001 | -1.44 | 0.017 | -1.34 | 0.010 | -1.49 | 0.044 |
| 1429273_at   | BMP-binding endothelial regulator                                                               | Bmper             | -1.36 | 0.087 | -2.3  | 0.047 | -1.13 | 0.124 | -1.14 | 0.297 | -1.49 | 0.038 |
| 1444439_at   | Bri3 binding protein                                                                            | Bri3bp            | 1.34  | 0.941 | 1.88  | 0.580 | -1.05 | 0.206 | -1.15 | 0.659 | -1.49 | 0.004 |
| 1423466_at   | chemokine (C-C motif) receptor 7                                                                | Ccr7              | 1.12  | 0.769 | -1.23 | 0.403 | -1.62 | 0.205 | -1.32 | 0.295 | -1.49 | 0.043 |
| 1446118_at   | DNA segment, Chr 17, ERATO Doi 165, expressed                                                   | D17Erd165e        | -1.21 | 0.619 | 1.39  | 0.711 | -1.09 | 0.516 | 2.41  | 0.130 | -1.49 | 0.011 |

|              |                                                                            |                    |       |       |       |       |       |       |       |       |       |       |
|--------------|----------------------------------------------------------------------------|--------------------|-------|-------|-------|-------|-------|-------|-------|-------|-------|-------|
| 1442604_at   | excision repair cross-complementing rodent repair deficiency, complement   | Ercc6              | 1.13  | 0.408 | 1.46  | 0.419 | 1.56  | 0.255 | 2.19  | 0.285 | -1.49 | 0.034 |
| 1438700_at   | formin binding protein 4                                                   | Fnbp4              | 1.24  | 0.408 | -1.13 | 0.337 | 1.48  | 0.208 | 1.12  | 0.220 | -1.49 | 0.038 |
| 1453222_at   | genetic suppressor element 1                                               | Gse1               | 6.11  | 0.725 | 5.76  | 0.922 | -1.18 | 0.094 | -1.16 | 0.071 | -1.49 | 0.002 |
| 1452449_at   | homeobox containing 1                                                      | Hmbox1             | 6.97  | 0.565 | 5.84  | 0.717 | -1.2  | 0.280 | -1.15 | 0.264 | -1.49 | 0.017 |
| 1435622_at   | heparan sulfate (glucosamine) 3-O-sulfotransferase 3A1                     | Hs3st3a1           | 1.44  | 0.732 | 1.73  | 0.201 | -1.22 | 0.239 | 1.32  | 0.650 | -1.49 | 0.005 |
| 1422235_at   | 5-hydroxytryptamine (serotonin) receptor 7                                 | Htr7               | -1.96 | 0.115 | -1.54 | 0.088 | 1.53  | 0.502 | 1.59  | 0.839 | -1.49 | 0.042 |
| 1444750_at   | Restin (Reed-Steinberg cell-expressed intermediate filament-associated p   | Rsn                | 3.15  | 0.275 | 1.56  | 0.429 | 1.03  | 0.745 | 1.05  | 0.812 | -1.49 | 0.017 |
| 1455353_at   | transmembrane and coiled coil domains 1                                    | Tmcc1              | 1.28  | 0.054 | 1.03  | 0.682 | -1.28 | 0.023 | -1.02 | 0.713 | -1.49 | 0.001 |
| 1425043_s_at | RIKEN cDNA 0610037D15 gene                                                 | 0610037D15Rik      | 1.08  | 0.837 | 1.11  | 0.947 | 1.35  | 0.249 | 1.16  | 0.319 | -1.48 | 0.042 |
| 1456557_at   | RIKEN cDNA 1700041C02 gene                                                 | 1700041C02Rik      | 1.21  | 0.873 | 1.42  | 0.987 | 1.36  | 0.695 | 1.28  | 0.379 | -1.48 | 0.034 |
| 1456567_at   | RIKEN cDNA 2610207I05 gene                                                 | 2610207I05Rik      | 1.04  | 0.778 | 1.02  | 0.741 | -1.18 | 0.118 | -1.25 | 0.130 | -1.48 | 0.028 |
| 1456050_at   | expressed sequence C80998                                                  | C80998             | 2.52  | 0.149 | 1.7   | 0.503 | -1.34 | 0.176 | -1.23 | 0.122 | -1.48 | 0.018 |
| 1422519_at   | calcium/calmodulin-dependent serine protein kinase (MAGUK family)          | Cask               | 2.26  | 0.411 | 1.22  | 0.345 | -1.25 | 0.109 | -1.29 | 0.044 | -1.48 | 0.024 |
| 1425445_a_at | claudin 18                                                                 | Cldn18             | 1.07  | 0.906 | -1.04 | 0.617 | -1.08 | 0.873 | 1.3   | 0.524 | -1.48 | 0.038 |
| 1429028_at   | dedicator of cytokinesis 11                                                | Dock11             | -1.02 | 0.630 | -1.9  | 0.083 | -1.26 | 0.008 | -1.39 | 0.028 | -1.48 | 0.014 |
| 1433491_at   | erythrocyte protein band 4, 1-like 2                                       | Epb4.1l2           | 22.4  | 0.418 | 14.39 | 0.732 | -1.4  | 0.005 | -1.14 | 0.175 | -1.48 | 0.027 |
| 1420080_a_at | glutamine fructose-6-phosphate transaminase 1                              | Gfpt1              | 1.03  | 0.954 | -2.35 | 0.001 | 1.53  | 0.440 | -1.07 | 0.598 | -1.48 | 0.018 |
| 1428640_at   | heat shock transcription factor 2 binding protein                          | Hsf2bp             | -1.5  | 0.059 | 1.51  | 0.129 | 1.17  | 0.837 | 1.07  | 0.497 | -1.48 | 0.035 |
| 1440582_at   | itchy /// RIKEN cDNA 8030492O04 gene                                       | Itch /// 8030492O0 | -1.06 | 0.468 | -1.75 | 0.015 | -1.06 | 0.512 | -1.04 | 0.753 | -1.48 | 0.036 |
| 1427212_at   | mitogen-activated protein kinase associated protein 1                      | Mapkap1            | 1.39  | 0.788 | -1.39 | 0.111 | -1.29 | 0.016 | -1.45 | 0.003 | -1.48 | 0.007 |
| 1435184_at   | natriuretic peptide receptor 3                                             | Npr3               | -1.17 | 0.158 | -1.96 | 0.042 | -1.23 | 0.034 | -1.09 | 0.188 | -1.48 | 0.022 |
| 1439137_at   | solute carrier family 4, sodium bicarbonate cotransporter, member 9        | Slc4a9             | 1.29  | 0.772 | 1.02  | 0.555 | 1.1   | 0.551 | -1.19 | 0.582 | -1.48 | 0.041 |
| 1445777_at   | UPF2 regulator of nonsense transcripts homolog (yeast)                     | Upf2               | 2.86  | 0.465 | 2.69  | 0.201 | 2.13  | 0.044 | -1.37 | 0.241 | -1.48 | 0.019 |
| 1417848_at   | zinc finger protein 704                                                    | Zfp704             | -1.37 | 0.262 | -3.26 | 0.102 | -1.38 | 0.003 | -1.36 | 0.109 | -1.48 | 0.005 |
| 1457592_x_at | RIKEN cDNA 2210018M03 gene                                                 | 2210018M03Rik      | 1.25  | 0.450 | 1.41  | 0.735 | 1.02  | 0.789 | -1.29 | 0.198 | -1.47 | 0.028 |
| 1432925_at   | RIKEN cDNA 4933416A02 gene                                                 | 4933416A02Rik      | 1.05  | 0.867 | -1.29 | 0.271 | -1.02 | 0.709 | -1.06 | 0.556 | -1.47 | 0.044 |
| 1418332_a_at | ATP/GTP binding protein 1 /// similar to ATP/GTP binding protein 1         | Agtpbp1 /// LOC67  | -1.18 | 0.384 | -1.27 | 0.232 | 1.02  | 0.934 | -1.03 | 0.831 | -1.47 | 0.040 |
| 1431239_at   | non-POU-domain-containing, octamer binding protein                         | Nono               | 1.32  | 0.215 | 1.23  | 0.140 | 1.03  | 0.813 | 1.22  | 0.201 | -1.47 | 0.044 |
| 1443204_at   | RNA binding motif, single stranded interacting protein                     | Rbms3              | 1.02  | 0.375 | -1.37 | 0.274 | -1.01 | 0.592 | -1.31 | 0.264 | -1.47 | 0.044 |
| 1434261_at   | signal-induced proliferation-associated 1 like 2                           | Sipa1l2            | 1.02  | 0.688 | -1.38 | 0.041 | -1.2  | 0.014 | -1.32 | 0.011 | -1.47 | 0.002 |
| 1439302_at   | ubiquitin-activating enzyme E1-like 2                                      | Ube1l2             | -1.06 | 0.526 | -1.57 | 0.038 | -1.49 | 0.015 | -1.32 | 0.003 | -1.47 | 0.018 |
| 1426977_at   | ubiquitin specific peptidase 47                                            | Usp47              | 1.16  | 0.321 | -1.06 | 0.572 | -1.28 | 0.025 | -1.18 | 0.026 | -1.47 | 0.017 |
| 1459907_a_at | Wolf-Hirschhorn syndrome candidate 1-like 1 (human)                        | Whsc1l1            | -1.11 | 0.278 | -1.36 | 0.073 | -1.16 | 0.255 | -1.35 | 0.247 | -1.47 | 0.046 |
| 1456389_at   | zinc finger homeobox 1b                                                    | Zfx1b              | 1.06  | 0.363 | -1.39 | 0.029 | -1.3  | 0.015 | -1.31 | 0.075 | -1.47 | 0.022 |
| 1438862_at   | RIKEN cDNA A630005I04 gene                                                 | A630005I04Rik      | 1.35  | 0.111 | -1.34 | 0.161 | -1.09 | 0.263 | -1.21 | 0.222 | -1.46 | 0.005 |
| 1454763_at   | ankyrin repeat domain 17                                                   | Ankrd17            | 1.59  | 0.304 | 1.63  | 0.542 | -1.28 | 0.004 | -1.36 | 0.005 | -1.46 | 0.001 |
| 1430820_a_at | bobby sox homolog (Drosophila)                                             | Bbx                | -1.27 | 0.136 | -2.12 | 0.039 | -1.43 | 0.155 | -1.17 | 0.218 | -1.46 | 0.032 |
| 1455306_at   | cDNA sequence BC037112                                                     | BC037112           | 1.11  | 0.674 | 1.18  | 0.418 | -1.06 | 0.448 | -1.23 | 0.029 | -1.46 | 0.000 |
| 1455072_at   | centrosomal protein 350                                                    | Cep350             | 1.06  | 0.133 | -1.25 | 0.005 | -1.13 | 0.185 | -1.35 | 0.023 | -1.46 | 0.008 |
| 1421729_a_at | fer (fms/fps related) protein kinase, testis specific 2                    | Fert2              | 1.64  | 0.793 | -1.09 | 0.367 | -1.58 | 0.002 | -1.55 | 0.009 | -1.46 | 0.031 |
| 1423271_at   | gap junction membrane channel protein beta 2                               | Gjb2               | -1.17 | 0.069 | -1.79 | 0.017 | -1.29 | 0.089 | -1.35 | 0.003 | -1.46 | 0.013 |
| 1449514_at   | G protein-coupled receptor kinase 5                                        | Gprk5              | 1.09  | 0.933 | -1.61 | 0.085 | -1.31 | 0.074 | -1.42 | 0.023 | -1.46 | 0.008 |
| 1460203_at   | inositol 1,4,5-triphosphate receptor 1                                     | Itpr1              | -1.24 | 0.068 | -2.05 | 0.011 | -1.32 | 0.029 | -1.29 | 0.030 | -1.46 | 0.037 |
| 1452347_at   | myocyte enhancer factor 2A                                                 | Mef2a              | 1.53  | 0.466 | 1.1   | 0.619 | -1.32 | 0.082 | -1.31 | 0.010 | -1.46 | 0.030 |
| 1426864_a_at | neural cell adhesion molecule 1                                            | Ncam1              | -1.26 | 0.227 | -1.87 | 0.094 | -1.34 | 0.014 | -1.23 | 0.075 | -1.46 | 0.014 |
| 1427640_a_at | runt-related transcription factor 1; translocated to, 1 (cyclin D-related) | Runx1t1            | 1.09  | 0.464 | -1.58 | 0.153 | -1.22 | 0.207 | -1.24 | 0.027 | -1.46 | 0.050 |
| 1449405_at   | tensin 1                                                                   | Tns1               | -1.04 | 0.500 | -1.32 | 0.040 | -1.53 | 0.004 | -1.42 | 0.008 | -1.46 | 0.006 |
| 1431530_a_at | tetraspanin 5                                                              | Tspan5             | 1.22  | 0.696 | -1.3  | 0.203 | -1.11 | 0.213 | -1.23 | 0.123 | -1.46 | 0.044 |
| 1436088_at   | RIKEN cDNA 0910001A06 gene                                                 | 0910001A06Rik      | -1.03 | 0.577 | -1.03 | 0.599 | -1.1  | 0.555 | -1.14 | 0.200 | -1.45 | 0.001 |
| 1428696_at   | RIKEN cDNA 2310015N21 gene                                                 | 2310015N21Rik      | -1.2  | 0.056 | -2.17 | 0.001 | -1.14 | 0.075 | -1.35 | 0.034 | -1.45 | 0.021 |
| 1456906_at   | RIKEN cDNA 4833432P19 gene                                                 | 4833432P19Rik      | -1.4  | 0.031 | -1.17 | 0.226 | 1.25  | 0.267 | 1.16  | 0.448 | -1.45 | 0.016 |
| 1432971_at   | RIKEN cDNA 4921518B13 gene                                                 | 4921518B13Rik      | 1.02  | 0.953 | -1.2  | 0.331 | 1.89  | 0.331 | 1.18  | 0.531 | -1.45 | 0.040 |
| 1433524_at   | expressed sequence AU042671                                                | AU042671           | 1.61  | 0.555 | 1.05  | 0.543 | -1.16 | 0.167 | 1.03  | 0.748 | -1.45 | 0.002 |
| 1443782_x_at | cytochrome P450, family 20, subfamily A, polypeptide 1                     | Cyp20a1            | 1.33  | 0.898 | -1.03 | 0.513 | -1.07 | 0.655 | 1.54  | 0.306 | -1.45 | 0.014 |
| 1420775_at   | haloacid dehalogenase-like hydrolase domain                                | Hdhd1a             | -1.6  | 0.225 | 1.08  | 0.573 | 1.12  | 0.783 | 1.07  | 0.392 | -1.45 | 0.047 |
| 1436089_at   | integrator complex subunit 6                                               | Ints6              | 1.16  | 0.284 | 1.16  | 0.547 | -1.17 | 0.100 | -1.14 | 0.209 | -1.45 | 0.036 |
| 1453317_a_at | KH domain containing, RNA binding, signal transduction associated 3        | Khdrbs3            | -1.12 | 0.055 | -1.73 | 0.007 | -1.44 | 0.002 | -1.28 | 0.011 | -1.45 | 0.000 |
| 1440708_at   | myosin, heavy polypeptide 9, non-muscle                                    | Myh9               | -1.2  | 0.412 | -1.57 | 0.184 | -1.32 | 0.102 | -1.28 | 0.028 | -1.45 | 0.025 |

|              |                                                                                      |                   |       |       |       |       |       |       |       |       |       |       |
|--------------|--------------------------------------------------------------------------------------|-------------------|-------|-------|-------|-------|-------|-------|-------|-------|-------|-------|
| 1457765_at   | Proteasome (prosome, macropain) 26S subunit, non-ATPase, 14                          | Psmid14           | 1.26  | 0.133 | 1.23  | 0.243 | -1.1  | 0.499 | -1.01 | 0.945 | -1.45 | 0.043 |
| 1424188_at   | RAB GTPase activating protein 1                                                      | Rabgap1           | 1.18  | 0.270 | 1.14  | 0.433 | -1.12 | 0.122 | -1.24 | 0.005 | -1.45 | 0.001 |
| 1431391_at   | Ral GEF with PH domain and SH3 binding motif 1                                       | Ralgps1           | -1.4  | 0.102 | -1.39 | 0.228 | 1.22  | 0.521 | -1.25 | 0.273 | -1.45 | 0.010 |
| 1459627_at   | Sterol-C4-methyl oxidase-like                                                        | Sc4mol            | 1.38  | 0.220 | 1.49  | 0.891 | 1.38  | 0.554 | -1.2  | 0.611 | -1.45 | 0.008 |
| 1423129_at   | soc-2 (suppressor of clear) homolog (C. elegans)                                     | Shoc2             | 1.38  | 0.397 | 1.22  | 0.671 | -1.34 | 0.008 | -1.28 | 0.036 | -1.45 | 0.025 |
| 1444089_at   | spectrin beta 2                                                                      | Sprnb2            | -1.11 | 0.265 | -1.45 | 0.010 | -1.37 | 0.101 | -1.15 | 0.145 | -1.45 | 0.005 |
| 1445109_at   | WD repeat domain 4                                                                   | Wdr4              | 1.01  | 0.576 | -1.04 | 0.322 | -1.22 | 0.170 | -1.18 | 0.478 | -1.45 | 0.048 |
| 1435091_at   | zinc finger protein 568                                                              | Zfp568            | 1.22  | 0.527 | 1.13  | 0.591 | -1.22 | 0.191 | -1.27 | 0.007 | -1.45 | 0.005 |
| 1433427_at   | RIKEN cDNA 1700111A04 gene                                                           | 1700111A04Rik     | 1.56  | 0.345 | 1.42  | 0.089 | -1.13 | 0.351 | -1.14 | 0.434 | -1.44 | 0.028 |
| 1454872_at   | RIKEN cDNA B230308N11 gene                                                           | B230308N11Rik     | -1.03 | 0.583 | -1.26 | 0.110 | -1    | 0.750 | 1.08  | 0.928 | -1.44 | 0.019 |
| 1434310_at   | bone morphogenic protein receptor, type II (serine/threonine kinase)                 | Bmpr2             | -1.04 | 0.375 | -1.49 | 0.014 | -1.25 | 0.013 | -1.18 | 0.127 | -1.44 | 0.005 |
| 1420683_at   | BCL2/adenovirus E1B 19kD interacting protein like                                    | Bnpl              | 1.73  | 0.195 | -1.02 | 0.896 | -1.11 | 0.508 | 1.03  | 0.836 | -1.44 | 0.045 |
| 1443083_at   | Cleavage and polyadenylation specific factor 2                                       | Cpsf2             | 1.43  | 0.682 | -1.05 | 0.546 | -1.21 | 0.332 | 2.67  | 0.238 | -1.44 | 0.012 |
| 1437119_at   | Endoplasmic reticulum (ER) to nucleus signalling 1                                   | Ern1              | -1.28 | 0.252 | -1.68 | 0.148 | -1.47 | 0.011 | -1.1  | 0.276 | -1.44 | 0.001 |
| 1455182_at   | kinesin family member 1B                                                             | Kif1b             | 1.04  | 0.350 | -1.04 | 0.774 | -1.23 | 0.034 | -1.21 | 0.083 | -1.44 | 0.003 |
| 1436307_at   | myosin IXa                                                                           | Myo9a             | -1.08 | 0.466 | -1.67 | 0.074 | -1.14 | 0.213 | -1.1  | 0.300 | -1.44 | 0.022 |
| 1418561_at   | splicing factor 3b, subunit 1                                                        | Sf3b1             | -1.1  | 0.478 | -1.61 | 0.065 | -1.16 | 0.003 | -1.12 | 0.288 | -1.44 | 0.001 |
| 1454894_at   | SMAD specific E3 ubiquitin protein ligase 2                                          | Smurf2            | 1.12  | 0.422 | -1.07 | 0.536 | -1.37 | 0.000 | -1.49 | 0.004 | -1.44 | 0.002 |
| 1433778_at   | tankyrase, TRF1-interacting ankyrin-related ADP-ribose polymerase                    | Tnks              | 2.19  | 0.337 | 1.55  | 0.860 | -1.15 | 0.176 | -1.19 | 0.035 | -1.44 | 0.003 |
| 1457662_x_at | thiamine pyrophosphokinase                                                           | Tpk1              | -1.62 | 0.031 | -1.61 | 0.116 | -1.2  | 0.264 | -1.74 | 0.064 | -1.44 | 0.039 |
| 1450163_a_at | Werner syndrome homolog (human)                                                      | Wrn               | 4.26  | 0.348 | 2.08  | 0.346 | -1.13 | 0.159 | -1.03 | 0.592 | -1.44 | 0.003 |
| 1441816_at   | RIKEN cDNA 2900056M20 gene                                                           | 2900056M20Rik     | -1.66 | 0.112 | -1.78 | 0.152 | 1.65  | 0.944 | -1.12 | 0.494 | -1.43 | 0.005 |
| 1434949_at   | armadillo repeat containing 8                                                        | Armc8             | -1.07 | 0.545 | -1.13 | 0.217 | -1.32 | 0.005 | -1.29 | 0.048 | -1.43 | 0.034 |
| 1434221_at   | cDNA sequence BC030863                                                               | BC030863          | 1.68  | 0.351 | 1.02  | 0.505 | -1.25 | 0.018 | -1.47 | 0.003 | -1.43 | 0.015 |
| 1437919_at   | B double prime 1, subunit of RNA polymerase III transcription initiation factor      | Bdp1              | 2.63  | 0.708 | 3.99  | 0.326 | -1.41 | 0.163 | -1.69 | 0.004 | -1.43 | 0.029 |
| 1452321_at   | bromodomain and WD repeat domain containing 1                                        | Brwd1             | -1    | 0.904 | -1.02 | 0.601 | -1.08 | 0.440 | -1.1  | 0.295 | -1.43 | 0.038 |
| 1459838_s_at | BTB (POZ) domain containing 11                                                       | Btbd11            | -1.24 | 0.389 | -3.27 | 0.145 | -1.2  | 0.143 | -1.63 | 0.000 | -1.43 | 0.041 |
| 1455287_at   | cyclin-dependent kinase 6                                                            | Cdk6              | -1.14 | 0.298 | -1.85 | 0.073 | -1.2  | 0.034 | -1.26 | 0.053 | -1.43 | 0.000 |
| 1445511_at   | centrin 4 /// similar to centrin 4                                                   | Cetn4 /// LOC6328 | -1.06 | 0.475 | 1.32  | 0.613 | -1.23 | 0.318 | 1.62  | 0.746 | -1.43 | 0.047 |
| 1452381_at   | cAMP responsive element binding protein 3-like 2                                     | Creb3l2           | 1.01  | 0.996 | -1.42 | 0.052 | -1.22 | 0.042 | -1.2  | 0.046 | -1.43 | 0.010 |
| 1434705_at   | C-terminal binding protein 2 /// zinc finger, RAN-binding domain containing          | Ctbp2 /// Zranb1  | 1.12  | 0.159 | -1.13 | 0.339 | -1.44 | 0.006 | -1.68 | 0.000 | -1.43 | 0.005 |
| 1444706_at   | RIKEN cDNA E430014L09 gene                                                           | E430014L09Rik     | 1.18  | 0.846 | -1.03 | 0.542 | -1.34 | 0.269 | -1.95 | 0.047 | -1.43 | 0.049 |
| 1427199_at   | furry homolog-like (Drosophila)                                                      | Fryl              | -1.07 | 0.138 | -2.02 | 0.005 | -1.61 | 0.012 | -1.39 | 0.091 | -1.43 | 0.008 |
| 1457849_at   | UDP-N-acetyl-alpha-D-galactosamine:polypeptide N-acetyl-galactosaminyl transferase 4 | Galnt4            | -1.53 | 0.187 | -1    | 0.429 | 1.9   | 0.050 | 1     | 0.989 | -1.43 | 0.046 |
| 1434935_at   | hypothetical protein LOC637741                                                       | LOC637741         | -1.18 | 0.402 | -1.75 | 0.184 | -1.19 | 0.007 | -1.32 | 0.001 | -1.43 | 0.000 |
| 1434112_at   | latrophilin 2                                                                        | Lphn2             | -1.15 | 0.327 | -1.88 | 0.022 | -1.34 | 0.002 | -1.14 | 0.113 | -1.43 | 0.019 |
| 1419386_at   | mucin 13, epithelial transmembrane                                                   | Muc13             | 1.36  | 0.549 | 1.17  | 0.609 | -1.2  | 0.352 | -1.29 | 0.318 | -1.43 | 0.036 |
| 1448528_at   | programmed cell death 10                                                             | Pdcd10            | -1.08 | 0.488 | -1.04 | 0.534 | -1.34 | 0.123 | -1.2  | 0.023 | -1.43 | 0.024 |
| 1455773_at   | Phosphatidylinositol binding clathrin assembly protein                               | Picalm            | 1.77  | 0.154 | 2.08  | 0.320 | -1.18 | 0.206 | 1.06  | 0.844 | -1.43 | 0.024 |
| 1444553_at   | Postmeiotic segregation increased 1 (S. cerevisiae)                                  | Pms1              | 1.27  | 0.415 | 1.24  | 0.319 | 1.4   | 0.760 | -1.88 | 0.011 | -1.43 | 0.022 |
| 1444884_at   | palmitoyl-protein thioesterase 1                                                     | Ppt1              | -2.14 | 0.089 | -1.4  | 0.149 | 1.56  | 0.515 | 1.68  | 0.329 | -1.43 | 0.001 |
| 1426550_at   | SID1 transmembrane family, member 1                                                  | Sid1              | -1.06 | 0.463 | 1.1   | 0.819 | 1.38  | 0.278 | -1.17 | 0.464 | -1.43 | 0.010 |
| 1434963_at   | suppressor of Ty 3 homolog (S. cerevisiae)                                           | Supt3h            | 2.07  | 0.747 | 1.65  | 0.551 | -1.19 | 0.179 | -1.03 | 0.676 | -1.43 | 0.014 |
| 1460735_at   | supervillin                                                                          | Svil              | 1.1   | 0.774 | -1.41 | 0.101 | -1.25 | 0.026 | -1.36 | 0.005 | -1.43 | 0.003 |
| 1421594_a_at | synaptotagmin-like 2                                                                 | Syt12             | -1.09 | 0.141 | -2.02 | 0.004 | -1.33 | 0.004 | -1.45 | 0.027 | -1.43 | 0.026 |
| 1419447_s_at | TBC1 domain family, member 1                                                         | Tbc1d1            | 1.17  | 0.447 | -1.26 | 0.126 | -1.31 | 0.003 | -1.5  | 0.001 | -1.43 | 0.009 |
| 1429253_at   | zinc finger, MYM-type 4                                                              | Zmym4             | 1.03  | 0.914 | -1.25 | 0.150 | -1.15 | 0.093 | -1.37 | 0.056 | -1.43 | 0.007 |
| 1432094_a_at | RIKEN cDNA 1700034M03 gene                                                           | 1700034M03Rik     | 2.05  | 0.407 | 1.41  | 0.911 | -1.09 | 0.307 | -1.1  | 0.360 | -1.42 | 0.010 |
| 1441773_at   | RIKEN cDNA 1700061N14 gene                                                           | 1700061N14Rik     | 1.45  | 0.808 | -1    | 0.432 | 1.11  | 0.964 | 2.86  | 0.123 | -1.42 | 0.024 |
| 1447459_at   | Apoptosis antagonizing transcription factor                                          | Aatf              | -1.37 | 0.315 | -1.21 | 0.427 | -1.18 | 0.286 | -1.29 | 0.351 | -1.42 | 0.032 |
| 1454918_at   | alkylglycerone phosphate synthase                                                    | Agps              | 1.02  | 0.854 | -1.26 | 0.007 | -1.2  | 0.172 | -1.29 | 0.072 | -1.42 | 0.003 |
| 1443868_at   | ATPase type 13A3                                                                     | Atp13a3           | 1.62  | 0.060 | 1.12  | 0.501 | -1.25 | 0.421 | -1.1  | 0.419 | -1.42 | 0.031 |
| 1434671_at   | RIKEN cDNA B230337E12 gene                                                           | B230337E12Rik     | -1.19 | 0.308 | -1.93 | 0.024 | -1.05 | 0.719 | -1.38 | 0.097 | -1.42 | 0.027 |
| 1457464_at   | hypothetical LOC403342                                                               | C130015C19        | 1.52  | 0.176 | 1.4   | 0.208 | -1.05 | 0.530 | 1.33  | 0.337 | -1.42 | 0.023 |
| 1435005_at   | centromere protein E                                                                 | Cenpe             | 1.14  | 0.139 | -1.18 | 0.211 | -1.23 | 0.146 | 1.02  | 0.717 | -1.42 | 0.021 |
| 1425016_at   | Eph receptor B2                                                                      | Ephb2             | 1.03  | 0.961 | -1.91 | 0.017 | -1.17 | 0.262 | -1.14 | 0.298 | -1.42 | 0.027 |
| 1428933_at   | histone deacetylase 8                                                                | Hdac8             | 1.2   | 0.707 | -1.5  | 0.082 | -1.33 | 0.024 | -1.24 | 0.221 | -1.42 | 0.042 |
| 1455746_at   | kinesin family member 13A                                                            | Kif13a            | 1.23  | 0.061 | -1.86 | 0.020 | -1.19 | 0.008 | -1.4  | 0.003 | -1.42 | 0.033 |

|              |                                                                          |                   |       |       |       |       |       |       |       |       |       |       |
|--------------|--------------------------------------------------------------------------|-------------------|-------|-------|-------|-------|-------|-------|-------|-------|-------|-------|
| 1427800_at   | keratin associated protein 16-2                                          | Krtap16-2         | 1.14  | 0.841 | -1.22 | 0.483 | -1.79 | 0.147 | -1.22 | 0.219 | -1.42 | 0.027 |
| 1427299_at   | ribosomal protein S6 kinase polypeptide 3                                | Rps6ka3           | -1.05 | 0.287 | -1.42 | 0.011 | -1.37 | 0.010 | -1.29 | 0.039 | -1.42 | 0.005 |
| 1459951_at   | ribosomal protein S6 kinase, polypeptide 1                               | Rps6kb1           | -1.28 | 0.320 | -1.27 | 0.351 | -1    | 0.769 | -1.16 | 0.562 | -1.42 | 0.034 |
| 1423077_at   | sorting nexin 9                                                          | Snx9              | 1.87  | 0.466 | 1.3   | 0.660 | -1.34 | 0.004 | -1.18 | 0.007 | -1.42 | 0.016 |
| 1418651_at   | spermatogenesis associated 6                                             | Spata6            | -1.16 | 0.207 | -1.86 | 0.032 | 1.03  | 0.894 | -1.2  | 0.163 | -1.42 | 0.042 |
| 1447411_at   | UDP-glucose dehydrogenase                                                | Ugdh              | -1.19 | 0.218 | 1.06  | 0.505 | 1.1   | 0.889 | 1.17  | 0.884 | -1.42 | 0.005 |
| 1455407_at   | zinc finger protein 236                                                  | Zfp236            | 1.09  | 0.299 | -1.36 | 0.102 | -1.27 | 0.009 | -1.3  | 0.067 | -1.42 | 0.021 |
| 1439216_at   | RIKEN cDNA 2900075B16 gene                                               | 2900075B16Rik     | 1.16  | 0.816 | -1.37 | 0.340 | -1.03 | 0.524 | 1.51  | 0.113 | -1.41 | 0.020 |
| 1432916_at   | RIKEN cDNA 5730407107 gene                                               | 5730407107Rik     | 5.57  | 0.269 | 3.49  | 0.250 | -1.11 | 0.529 | 1.35  | 0.828 | -1.41 | 0.047 |
| 1443752_at   | RIKEN cDNA E230008N13 gene                                               | E230008N13Rik     | 1.75  | 0.050 | 2.17  | 0.342 | 1.4   | 0.949 | -1.45 | 0.242 | -1.41 | 0.043 |
| 1445266_at   | excision repair cross-complementing rodent repair deficiency, complement | Ercc1             | 1.82  | 0.544 | 3.26  | 0.155 | -1.09 | 0.440 | -1.34 | 0.252 | -1.41 | 0.050 |
| 1415757_at   | golgi-specific brefeldin A-resistance factor 1                           | Gbf1              | 1.48  | 0.816 | 1     | 0.364 | -1.25 | 0.010 | -1.21 | 0.002 | -1.41 | 0.001 |
| 1435185_at   | leucine rich repeat and coiled-coil domain containing 1                  | Lrrcc1            | 2.51  | 0.498 | 1.67  | 0.560 | 1.42  | 0.425 | -1.45 | 0.013 | -1.41 | 0.046 |
| 1448870_at   | latent transforming growth factor beta binding protein 1                 | Ltbp1             | -1.13 | 0.155 | -1.35 | 0.038 | -1.28 | 0.009 | -1.28 | 0.007 | -1.41 | 0.018 |
| 1429911_at   | microcephaly, primary autosomal recessive 1                              | Mcp1              | -1.16 | 0.037 | -2.34 | 0.006 | -1.49 | 0.034 | -1.5  | 0.032 | -1.41 | 0.010 |
| 1455179_at   | membrane protein, palmitoylated 7 (MAGUK p55 subfamily member 7)         | Mpp7              | 1.18  | 0.815 | -2.63 | 0.004 | -1.12 | 0.402 | -1.29 | 0.110 | -1.41 | 0.010 |
| 1438067_at   | neurofibromatosis 1                                                      | Nf1               | -1.09 | 0.470 | -1.29 | 0.232 | -1.44 | 0.078 | -1.31 | 0.082 | -1.41 | 0.008 |
| 1439154_at   | nucleoporin 98                                                           | Nup98             | 1.1   | 0.307 | -1.03 | 0.635 | -1.13 | 0.100 | -1.22 | 0.050 | -1.41 | 0.012 |
| 1436780_at   | O-linked N-acetylglucosamine (GlcNAc) transferase (UDP-N-acetylglucosyl  | Ogt               | 2.54  | 0.339 | 1.9   | 0.682 | 1.2   | 0.327 | 1.11  | 0.710 | -1.41 | 0.021 |
| 1441026_at   | poly (ADP-ribose) polymerase family, member 4                            | Parp4             | 1.24  | 0.331 | -1.19 | 0.528 | -1.23 | 0.369 | -1.31 | 0.197 | -1.41 | 0.032 |
| 1444422_at   | protocadherin 19                                                         | Pcdh19            | -1.21 | 0.242 | -1.87 | 0.022 | -1.34 | 0.002 | -1.26 | 0.078 | -1.41 | 0.006 |
| 1428725_at   | protein inhibitor of activated STAT 2                                    | Pias2             | -1.14 | 0.412 | -1.52 | 0.123 | -1.15 | 0.137 | -1.14 | 0.096 | -1.41 | 0.002 |
| 1459903_at   | sema domain, immunoglobulin domain (Ig), and GPI membrane anchor, (s     | Sema7a            | -1.21 | 0.128 | -1.85 | 0.049 | -1.35 | 0.013 | -1.38 | 0.018 | -1.41 | 0.005 |
| 1457778_at   | storkhead box 2                                                          | Stox2             | 1.5   | 0.464 | 1.39  | 0.622 | -1.15 | 0.093 | -1.14 | 0.118 | -1.41 | 0.046 |
| 1449821_a_at | RIKEN cDNA 0610016J10 gene /// hypothetical LOC619602                    | 0610016J10Rik /// | 1.17  | 0.587 | -1.14 | 0.284 | -1.2  | 0.024 | -1.19 | 0.021 | -1.4  | 0.014 |
| 1458963_at   | RIKEN cDNA 1810054D07 gene                                               | 1810054D07Rik     | 1.04  | 0.788 | -1.12 | 0.356 | -1.19 | 0.018 | -1.33 | 0.012 | -1.4  | 0.006 |
| 1434817_s_at | RIKEN cDNA 4930535B03 gene                                               | 4930535B03Rik     | -1.06 | 0.231 | -1.16 | 0.240 | -1.03 | 0.726 | -1.31 | 0.119 | -1.4  | 0.045 |
| 1427980_at   | RIKEN cDNA 4933407C03 gene                                               | 4933407C03Rik     | 1.3   | 0.240 | -1.06 | 0.740 | -1.37 | 0.002 | -1.44 | 0.019 | -1.4  | 0.001 |
| 1419758_at   | ATP-binding cassette, sub-family B (MDR/TAP), member 1A                  | Abcb1a            | 1.52  | 0.187 | 1.33  | 0.750 | 1.49  | 0.621 | 1.88  | 0.356 | -1.4  | 0.011 |
| 1454916_s_at | ADP-ribosylation factor interacting protein 1                            | Arfp1             | 1.01  | 0.891 | -1.38 | 0.004 | -1.19 | 0.078 | -1.22 | 0.002 | -1.4  | 0.022 |
| 1456257_at   | RIKEN cDNA C130065N10 gene                                               | C130065N10Rik     | 1.14  | 0.362 | 1.12  | 0.661 | -1.42 | 0.031 | -1.06 | 0.299 | -1.4  | 0.034 |
| 1447156_at   | Choroideremia                                                            | Chm               | 2.49  | 0.149 | 1.37  | 0.965 | 1     | 0.608 | 1.5   | 0.544 | -1.4  | 0.003 |
| 1428563_at   | DEAD (Asp-Glu-Ala-Asp) box polypeptide 10                                | Ddx10             | 1.08  | 0.830 | -1.2  | 0.178 | -1.1  | 0.290 | -1.08 | 0.215 | -1.4  | 0.001 |
| 1451530_at   | epidermal growth factor receptor                                         | Egfr              | 1.42  | 0.610 | 1.02  | 0.413 | -1.22 | 0.165 | -1.28 | 0.095 | -1.4  | 0.047 |
| 1442116_at   | G protein-coupled receptor 176                                           | Gpr176            | -1.15 | 0.045 | -1.59 | 0.001 | -1.22 | 0.062 | -1.18 | 0.068 | -1.4  | 0.020 |
| 1426491_at   | hect (homologous to the E6-AP (UBE3A) carboxyl terminus) domain and F    | Herc2             | -1.13 | 0.065 | -1.32 | 0.050 | -1.25 | 0.001 | -1.3  | 0.054 | -1.4  | 0.006 |
| 1435139_at   | NMDA receptor-regulated gene 1                                           | Narg1             | 1     | 0.997 | -1.16 | 0.062 | -1.31 | 0.024 | -1.15 | 0.275 | -1.4  | 0.027 |
| 1438684_at   | NUAK family, SNF1-like kinase, 1                                         | Nuak1             | -1.22 | 0.248 | -1.41 | 0.152 | -1.3  | 0.006 | -1.32 | 0.030 | -1.4  | 0.010 |
| 1416891_at   | numb gene homolog (Drosophila)                                           | Numb              | -1.01 | 0.740 | -1.39 | 0.011 | -1.2  | 0.050 | -1.41 | 0.008 | -1.4  | 0.002 |
| 1428484_at   | oxysterol binding protein-like 3                                         | Osbpl3            | -1.03 | 0.297 | -1.59 | 0.026 | -1.28 | 0.005 | -1.25 | 0.078 | -1.4  | 0.000 |
| 1417148_at   | platelet derived growth factor receptor, beta polypeptide                | Pdgfrb            | 1.19  | 0.743 | 1.01  | 0.722 | -1.27 | 0.041 | -1.14 | 0.230 | -1.4  | 0.001 |
| 1449799_s_at | plakophilin 2                                                            | Pkp2              | -1.15 | 0.378 | -1.67 | 0.092 | -1.28 | 0.054 | -1.4  | 0.000 | -1.4  | 0.002 |
| 1426047_a_at | protein tyrosine phosphatase, receptor type, R                           | Ptprr             | 1.22  | 0.402 | 1.4   | 0.522 | 1.41  | 0.713 | 1.59  | 0.788 | -1.4  | 0.027 |
| 1448689_at   | related RAS viral (r-ras) oncogene homolog 2                             | Rras2             | 1.06  | 0.308 | -1.18 | 0.079 | -1.24 | 0.005 | -1.24 | 0.007 | -1.4  | 0.002 |
| 1449815_a_at | single-stranded DNA binding protein 2                                    | Ssbp2             | -1.2  | 0.017 | -2.62 | 0.010 | -1.42 | 0.033 | -1.2  | 0.086 | -1.4  | 0.001 |
| 1428546_at   | synaptotagmin binding, cytoplasmic RNA interacting protein               | Syncrip           | -1.1  | 0.384 | -1.3  | 0.090 | -1.21 | 0.031 | -1.27 | 0.053 | -1.4  | 0.004 |
| 1459666_at   | trafficking protein, kinesin binding 1                                   | Trak1             | -1.26 | 0.096 | -1.4  | 0.005 | -1.36 | 0.020 | -1.22 | 0.046 | -1.4  | 0.044 |
| 1433676_at   | WNK lysine deficient protein kinase 1                                    | Wnk1              | -1.02 | 0.347 | -1.37 | 0.002 | -1.26 | 0.017 | -1.3  | 0.016 | -1.4  | 0.001 |
| 1433653_at   | cDNA sequence BC029169                                                   | BC029169          | 1.14  | 0.690 | -1.26 | 0.172 | -1.17 | 0.117 | -1    | 0.861 | -1.39 | 0.033 |
| 1418071_s_at | chromodomain protein, Y chromosome-like                                  | Cdyl              | -1.05 | 0.426 | -1.37 | 0.034 | -1.27 | 0.080 | -1.39 | 0.004 | -1.39 | 0.022 |
| 1459005_at   | RIKEN cDNA D030051N19 gene                                               | D030051N19Rik     | -1.14 | 0.377 | -1.28 | 0.369 | -1.56 | 0.029 | -1.16 | 0.356 | -1.39 | 0.010 |
| 1448665_at   | dystrophin, muscular dystrophy                                           | Dmd               | -1.02 | 0.519 | -1.49 | 0.028 | -1.33 | 0.015 | -1.45 | 0.039 | -1.39 | 0.019 |
| 1452718_at   | E3 ubiquitin protein ligase, HECT domain containing, 1                   | Edd1              | -1.05 | 0.481 | -1.13 | 0.125 | -1.26 | 0.021 | -1.29 | 0.021 | -1.39 | 0.006 |
| 1455257_at   | integrin beta 3                                                          | Itg3              | -1.26 | 0.246 | -2.22 | 0.121 | -1.24 | 0.077 | -1.13 | 0.081 | -1.39 | 0.002 |
| 1434194_at   | microtubule-associated protein 2                                         | Mtap2             | 1.05  | 0.869 | -1.37 | 0.250 | -1.05 | 0.551 | 1.25  | 0.243 | -1.39 | 0.043 |
| 1454824_s_at | mitochondrial tumor suppressor 1                                         | Mtus1             | 1.65  | 0.248 | 1.22  | 0.624 | -1.29 | 0.197 | -1.34 | 0.054 | -1.39 | 0.010 |
| 1447640_s_at | pre B-cell leukemia transcription factor 3                               | Pbx3              | -1.17 | 0.432 | -2.01 | 0.182 | -1.28 | 0.004 | -1.48 | 0.009 | -1.39 | 0.029 |
| 1419716_a_at | POU domain, class 2, transcription factor 1                              | Pou2f1            | 1.84  | 0.732 | 1.6   | 0.751 | -1.16 | 0.410 | -1    | 0.823 | -1.39 | 0.042 |

|                |                                                                             |                     |       |       |       |       |       |       |       |       |       |       |
|----------------|-----------------------------------------------------------------------------|---------------------|-------|-------|-------|-------|-------|-------|-------|-------|-------|-------|
| 1424632_a_at   | REV3-like, catalytic subunit of DNA polymerase zeta RAD54 like (S. cerev    | Rev3l               | -1.15 | 0.441 | -1.88 | 0.143 | -1.05 | 0.584 | -1.03 | 0.600 | -1.39 | 0.021 |
| 1449865_at     | sema domain, immunoglobulin domain (Ig), short basic domain, secreted,      | Sema3a              | 1.23  | 0.725 | -1.53 | 0.043 | -1.23 | 0.081 | -1.17 | 0.076 | -1.39 | 0.047 |
| 1418755_at     | T-box 15                                                                    | Tbx15               | -1.06 | 0.513 | -1.1  | 0.253 | 1.15  | 0.548 | -1.23 | 0.024 | -1.39 | 0.033 |
| 1416487_a_at   | yes-associated protein 1                                                    | Yap1                | 1.29  | 0.502 | 1.03  | 0.746 | -1.42 | 0.009 | -1.26 | 0.028 | -1.39 | 0.035 |
| 1430154_at     | RIKEN cDNA 4930543C13 gene                                                  | 4930543C13Rik       | -1.28 | 0.126 | -1.3  | 0.100 | -1.16 | 0.189 | -1.11 | 0.500 | -1.38 | 0.003 |
| 1457513_at     | RIKEN cDNA 6330569M22 gene                                                  | 6330569M22Rik       | 1.82  | 0.704 | 1.82  | 0.453 | -1.1  | 0.413 | 1.16  | 0.122 | -1.38 | 0.002 |
| 1434335_at     | expressed sequence AI317237                                                 | AI317237            | -1.17 | 0.067 | -1.64 | 0.024 | -1.18 | 0.003 | -1.5  | 0.018 | -1.38 | 0.003 |
| 1451159_at     | Rho guanine nucleotide exchange factor (GEF) 12                             | Arhgef12            | 1.47  | 0.419 | 1.01  | 0.617 | -1.1  | 0.322 | -1.27 | 0.014 | -1.38 | 0.004 |
| 1446326_at     | procollagen, type I, alpha 2                                                | Col1a2              | -1.2  | 0.315 | -1.99 | 0.141 | 1.09  | 0.749 | 1.14  | 0.533 | -1.38 | 0.005 |
| 1417960_at     | cytoplasmic polyadenylation element binding protein 1                       | Cpeb1               | 1.56  | 0.558 | 1.12  | 0.517 | -1.1  | 0.135 | -1.18 | 0.140 | -1.38 | 0.006 |
| 1427318_s_at   | dysferlin /// fer-1-like 3, myoferlin (C. elegans)                          | Dysf /// Fer1l3     | 1.89  | 0.421 | 1.47  | 0.857 | -1.15 | 0.061 | -1.15 | 0.030 | -1.38 | 0.002 |
| 1435362_at     | forkhead box J3                                                             | Foxj3               | -1.09 | 0.413 | 1.02  | 0.787 | -1.19 | 0.054 | -1.12 | 0.337 | -1.38 | 0.045 |
| 1455078_at     | Heat shock protein 90kDa alpha (cytosolic), class A member 1                | Hsp90aa1            | 1.04  | 0.800 | -1.61 | 0.011 | -1.37 | 0.008 | -1.54 | 0.017 | -1.38 | 0.016 |
| 1419053_at     | peroxisomal biogenesis factor 14                                            | Pex14               | -1    | 0.770 | -1.59 | 0.035 | -1.13 | 0.263 | -1.4  | 0.001 | -1.38 | 0.048 |
| 1459209_at     | Ring finger protein 10                                                      | Rnf10               | 1.22  | 0.664 | 1.86  | 0.613 | 1.03  | 0.573 | 1.01  | 0.589 | -1.38 | 0.013 |
| 1419181_at     | zinc finger protein 326                                                     | Zfp326              | -1.09 | 0.387 | -1.12 | 0.105 | -1.05 | 0.369 | -1.31 | 0.023 | -1.38 | 0.044 |
| 1447947_at     | zinc finger, FYVE domain containing 16                                      | Zfyve16             | 1.24  | 0.094 | 1.23  | 0.174 | 1.1   | 0.523 | -1.13 | 0.250 | -1.38 | 0.021 |
| 1417361_at     | ankyrin repeat and SOCS box-containing protein 3                            | Asb3                | 1.21  | 0.588 | -1.48 | 0.104 | -1.16 | 0.085 | -1.25 | 0.108 | -1.37 | 0.042 |
| 1436031_at     | cache domain containing 1                                                   | Cachd1              | -1.26 | 0.126 | -2.63 | 0.036 | -1.18 | 0.118 | -1.13 | 0.307 | -1.37 | 0.035 |
| 1455440_at     | chloride channel 6                                                          | Clcn6               | 1.02  | 0.952 | -1.26 | 0.012 | -1.29 | 0.025 | -1.2  | 0.188 | -1.37 | 0.013 |
| 1422887_a_at   | C-terminal binding protein 2                                                | Ctbp2               | 1.03  | 0.459 | -1.22 | 0.068 | -1.39 | 0.009 | -1.46 | 0.000 | -1.37 | 0.012 |
| 1437448_s_at   | catenin (cadherin associated protein), delta 1                              | Ctnd1               | 1.27  | 0.658 | 1.06  | 0.757 | -1.16 | 0.306 | -1.28 | 0.004 | -1.37 | 0.004 |
| 1438658_a_at   | endothelial differentiation, sphingolipid G-protein-coupled receptor, 3     | Edg3                | -1.43 | 0.285 | -2    | 0.181 | -1.31 | 0.006 | -1.29 | 0.020 | -1.37 | 0.015 |
| 1424986_s_at   | F-box and WD-40 domain protein 7, archipelago homolog (Drosophila)          | Fbxw7               | -1.07 | 0.439 | -1.09 | 0.930 | 1.03  | 0.957 | -1.11 | 0.407 | -1.37 | 0.035 |
| 1451264_at     | FERM domain containing 6                                                    | Frm6                | 1.16  | 0.580 | -1.06 | 0.583 | -1.31 | 0.016 | -1.28 | 0.014 | -1.37 | 0.002 |
| 1425942_a_at   | glycoprotein m6b                                                            | Gpm6b               | 3.55  | 0.039 | 2.88  | 0.316 | -1.2  | 0.376 | -1.09 | 0.912 | -1.37 | 0.025 |
| 1437103_at     | insulin-like growth factor 2 mRNA binding protein 2                         | Igf2bp2             | 1.01  | 0.898 | -1.27 | 0.042 | -1.26 | 0.003 | -1.25 | 0.001 | -1.37 | 0.009 |
| 1454862_at     | pleckstrin homology-like domain, family B, member 2                         | Phldb2              | -1.06 | 0.576 | -1.35 | 0.115 | -1.23 | 0.048 | -1.37 | 0.008 | -1.37 | 0.011 |
| 1449404_at     | phosphatidylinositol-4-phosphate 5-kinase, type II, alpha                   | Pip5k2a             | -1.2  | 0.260 | -2.02 | 0.055 | -1.26 | 0.008 | -1.34 | 0.003 | -1.37 | 0.006 |
| 1439797_at     | peroxisome proliferator activator receptor delta                            | Ppard               | -1.14 | 0.224 | -1.14 | 0.164 | 1.2   | 0.307 | -1.11 | 0.187 | -1.37 | 0.008 |
| 1452056_s_at   | protein phosphatase 3, catalytic subunit, alpha isoform                     | Ppp3ca              | -1.21 | 0.023 | -2.15 | 0.008 | -1.25 | 0.127 | -1.46 | 0.006 | -1.37 | 0.001 |
| 1418036_at     | DNA primase, p58 subunit                                                    | Prim2               | 1.02  | 0.738 | -1.47 | 0.005 | -1.1  | 0.249 | -1.22 | 0.042 | -1.37 | 0.005 |
| 1420885_a_at   | seizure related gene 6                                                      | Sez6                | 1.73  | 0.950 | 1.73  | 0.434 | 1.32  | 0.109 | 1.22  | 0.059 | -1.37 | 0.026 |
| 1452373_at     | RIKEN cDNA 1700081L11 gene                                                  | 1700081L11Rik       | 1.79  | 0.433 | 2.12  | 0.414 | -1.03 | 0.574 | -1.14 | 0.094 | -1.36 | 0.003 |
| 1429475_at     | RIKEN cDNA 2810457I06 gene                                                  | 2810457I06Rik       | 1.31  | 0.051 | -1.43 | 0.106 | -1.34 | 0.165 | -1.3  | 0.095 | -1.36 | 0.007 |
| 1428691_at     | RIKEN cDNA 5630401D06 gene                                                  | 5630401D06Rik       | -1    | 0.828 | -1.14 | 0.200 | -1.23 | 0.007 | -1.07 | 0.168 | -1.36 | 0.044 |
| 1428829_at     | RIKEN cDNA 6820401H01 gene                                                  | 6820401H01Rik       | -1.15 | 0.406 | -2.32 | 0.129 | -1.18 | 0.002 | -1.26 | 0.044 | -1.36 | 0.000 |
| 1438895_at     | RIKEN cDNA A430102J17 gene                                                  | A430102J17Rik       | -1.07 | 0.563 | -1.07 | 0.482 | 1.07  | 0.916 | 1.14  | 0.622 | -1.36 | 0.028 |
| 1427197_at     | ataxia telangiectasia and Rad3 related                                      | Atr                 | -1.1  | 0.361 | -1.71 | 0.065 | -1.03 | 0.592 | -1.17 | 0.244 | -1.36 | 0.026 |
| 1424836_a_at   | CLIP associating protein 2                                                  | Clasp2              | -1    | 0.638 | -1.72 | 0.133 | -1.23 | 0.201 | -1.49 | 0.002 | -1.36 | 0.006 |
| 1423699_at     | DNA segment, Chr 15, ERATO Doi 785, expressed                               | D15ErtD785e         | -1.01 | 0.731 | 1.05  | 0.810 | -1.36 | 0.018 | 1.01  | 0.971 | -1.36 | 0.017 |
| 1455242_at     | forkhead box P1                                                             | Foxp1               | 1.35  | 0.401 | 1.08  | 0.560 | -1.22 | 0.027 | -1.34 | 0.009 | -1.36 | 0.003 |
| 1441208_at     | Haloacid dehalogenase-like hydrolase domain containing 2                    | Hdh2                | 1.12  | 0.318 | -1.14 | 0.219 | 1.26  | 0.315 | 1.22  | 0.576 | -1.36 | 0.039 |
| 1457377_at     | L(3)mbt-like 3 (Drosophila)                                                 | L3mbtl3             | 1.17  | 0.873 | 3.17  | 0.024 | -1.36 | 0.204 | -1.09 | 0.606 | -1.36 | 0.040 |
| 1424893_at     | nuclear distribution gene E-like homolog 1 (A. nidulans)                    | Ndel1               | 1     | 0.842 | -1.11 | 0.103 | -1.06 | 0.564 | -1.09 | 0.277 | -1.36 | 0.037 |
| 1422465_a_at   | nucleoredoxin                                                               | Nxn                 | -1.02 | 0.832 | -1.47 | 0.016 | -1.27 | 0.015 | -1.25 | 0.001 | -1.36 | 0.019 |
| 1445137_at     | PTK2 protein tyrosine kinase 2                                              | Ptk2                | 1.16  | 0.792 | 1.31  | 0.035 | 1.17  | 0.393 | -1.07 | 0.268 | -1.36 | 0.045 |
| 1448584_at     | arginine/serine-rich coiled-coil 1                                          | Rsrc1               | -1.09 | 0.255 | -1.42 | 0.067 | -1.27 | 0.010 | -1.17 | 0.008 | -1.36 | 0.015 |
| 1433648_at     | sperm associated antigen 9                                                  | Spag9               | 1.08  | 0.400 | -1.4  | 0.049 | -1.34 | 0.002 | -1.22 | 0.021 | -1.36 | 0.006 |
| AFFX-ThrX-3_at | ---                                                                         | ---                 | 1.37  | 0.461 | -1.03 | 0.535 | -1.36 | 0.245 | 1.51  | 0.149 | -1.35 | 0.011 |
| 1424784_at     | RIKEN cDNA 1700029I01 gene /// similar to zinc finger protein 665 /// simil | 1700029I01Rik /// I | -1.09 | 0.301 | -1.06 | 0.590 | -1.02 | 0.761 | -1.09 | 0.258 | -1.35 | 0.046 |
| 1434184_s_at   | RIKEN cDNA 9430080K19 gene                                                  | 9430080K19Rik       | 1.1   | 0.319 | -1.13 | 0.137 | -1.23 | 0.048 | -1.31 | 0.000 | -1.35 | 0.007 |
| 1450915_at     | adaptor-related protein complex 3, beta 1 subunit                           | Ap3b1               | 1.11  | 0.514 | -1.29 | 0.107 | -1.33 | 0.032 | -1.33 | 0.047 | -1.35 | 0.012 |
| 1429433_at     | BAT2 domain containing 1                                                    | Bat2d               | 1.12  | 0.469 | 1.17  | 0.620 | -1.31 | 0.136 | -1.06 | 0.283 | -1.35 | 0.022 |
| 1441137_at     | bicaudal C homolog 1 (Drosophila)                                           | Bicc1               | 1.08  | 0.730 | -1.49 | 0.057 | -1.23 | 0.003 | -1.31 | 0.006 | -1.35 | 0.043 |
| 1454880_s_at   | Bcl2 modifying factor                                                       | Bmf                 | -1.24 | 0.298 | -1.49 | 0.268 | 1.7   | 0.486 | 1.56  | 0.029 | -1.35 | 0.037 |
| 1450757_at     | cadherin 11                                                                 | Cdh11               | 1.18  | 0.506 | -1.18 | 0.213 | -1.32 | 0.004 | -1.3  | 0.001 | -1.35 | 0.007 |
| 1427274_at     | RIKEN cDNA D130054N24 gene                                                  | D130054N24Rik       | -1.07 | 0.484 | 1.16  | 0.730 | -1.05 | 0.623 | -1.12 | 0.432 | -1.35 | 0.006 |

|              |                                                                            |               |       |       |       |       |       |       |       |       |       |       |
|--------------|----------------------------------------------------------------------------|---------------|-------|-------|-------|-------|-------|-------|-------|-------|-------|-------|
| 1433474_at   | EGF-like repeats and discoidin I-like domains 3                            | Edil3         | -1.13 | 0.248 | -1.27 | 0.077 | -1.13 | 0.115 | -1.2  | 0.024 | -1.35 | 0.015 |
| 1436866_at   | ehrin A5                                                                   | Efna5         | -1.19 | 0.114 | -2.62 | 0.015 | 1.02  | 0.954 | -1.38 | 0.044 | -1.35 | 0.048 |
| 1460562_at   | elongation factor Tu GTP binding domain containing 1                       | Eftud1        | -1.05 | 0.470 | -1.21 | 0.220 | -1.07 | 0.533 | -1.17 | 0.144 | -1.35 | 0.029 |
| 1449167_at   | erythrocyte protein band 4.1-like 4a                                       | Epb4.114a     | -1.05 | 0.400 | -1.42 | 0.114 | -1.14 | 0.136 | -1.3  | 0.041 | -1.35 | 0.014 |
| 1434260_at   | FCH and double SH3 domains 2                                               | Fchsd2        | -1.03 | 0.511 | -1.63 | 0.031 | -1.32 | 0.011 | -1.68 | 0.000 | -1.35 | 0.005 |
| 1439396_x_at | glycerol-3-phosphate dehydrogenase 1 (soluble)                             | Gpd1          | 1.34  | 0.764 | 2.53  | 0.516 | -1.43 | 0.210 | 1.69  | 0.815 | -1.35 | 0.004 |
| 1416722_at   | high mobility group 20A                                                    | Hmg20a        | 1.13  | 0.618 | -1.26 | 0.090 | -1.08 | 0.229 | -1.1  | 0.317 | -1.35 | 0.000 |
| 1434690_at   | lysocardiolipin acyltransferase                                            | Lycat         | 1.28  | 0.484 | -1.19 | 0.210 | -1.13 | 0.214 | -1.18 | 0.005 | -1.35 | 0.004 |
| 1426686_s_at | mitogen activated protein kinase kinase 3                                  | Map3k3        | 1.06  | 0.945 | -1.03 | 0.582 | -1.08 | 0.314 | -1.09 | 0.239 | -1.35 | 0.021 |
| 1454997_at   | methionine sulfoxide reductase B3                                          | Msrb3         | 1.15  | 0.383 | -1.24 | 0.083 | -1.18 | 0.007 | -1.21 | 0.072 | -1.35 | 0.006 |
| 1420521_at   | papilin, proteoglycan-like sulfated glycoprotein                           | Papln         | 1.4   | 0.970 | -1.15 | 0.438 | -1.13 | 0.452 | 1.28  | 0.465 | -1.35 | 0.018 |
| 1460398_at   | PHD finger protein 8                                                       | Phf8          | 1.06  | 0.855 | 1.01  | 0.748 | 1.01  | 0.928 | -1.23 | 0.001 | -1.35 | 0.007 |
| 1421560_at   | snail homolog 3 (Drosophila)                                               | Snai3         | 1.05  | 0.449 | -1.08 | 0.478 | 1.14  | 0.333 | 1.16  | 0.692 | -1.35 | 0.001 |
| 1450916_at   | staufer (RNA binding protein) homolog 2 (Drosophila)                       | Stau2         | 1.04  | 0.892 | -1.99 | 0.050 | -1.28 | 0.043 | -1.33 | 0.018 | -1.35 | 0.016 |
| 1420895_at   | transforming growth factor, beta receptor I                                | Tgfb1         | 1.14  | 0.544 | -1.13 | 0.268 | -1.24 | 0.097 | -1.19 | 0.079 | -1.35 | 0.016 |
| 1459414_at   | WD repeat and FYVE domain containing 3                                     | Wdfy3         | 1.04  | 0.840 | -1.18 | 0.447 | -1.18 | 0.463 | 1.23  | 0.454 | -1.35 | 0.044 |
| 1455483_at   | zinc finger protein 148                                                    | Zfp148        | -1.2  | 0.337 | -1.25 | 0.299 | -1.19 | 0.023 | -1.35 | 0.002 | -1.35 | 0.023 |
| 1429121_at   | RIKEN cDNA 4921517N04 gene                                                 | 4921517N04Rik | 1.08  | 0.024 | 1.06  | 0.450 | -1.08 | 0.362 | -1.06 | 0.328 | -1.34 | 0.008 |
| 1443870_at   | ATP-binding cassette, sub-family C (CFTR/MRP), member 4                    | Abcc4         | -1.38 | 0.031 | -2.43 | 0.034 | -1.39 | 0.004 | -1.25 | 0.012 | -1.34 | 0.049 |
| 1460374_at   | a disintegrin and metallopeptidase domain 2                                | Adam2         | 1.96  | 0.252 | 1.6   | 0.303 | -1.14 | 0.403 | 1.42  | 0.081 | -1.34 | 0.045 |
| 1436739_at   | angiotensin II receptor, type 1a                                           | Agtr1a        | 1.23  | 0.130 | 1     | 0.839 | -1.02 | 0.744 | -1.18 | 0.002 | -1.34 | 0.001 |
| 1435280_at   | expressed sequence AI452195                                                | AI452195      | -1.14 | 0.398 | -1.32 | 0.249 | -1.31 | 0.019 | -1.13 | 0.031 | -1.34 | 0.009 |
| 1435769_at   | A kinase (PRKA) anchor protein (yotiao) 9                                  | Akap9         | -1.03 | 0.630 | -1.71 | 0.022 | -1.34 | 0.031 | -1.31 | 0.030 | -1.34 | 0.036 |
| 1420992_at   | ankyrin repeat domain 1 (cardiac muscle)                                   | Ankrd1        | 1.13  | 0.325 | -1.1  | 0.343 | -1.17 | 0.138 | -1.07 | 0.128 | -1.34 | 0.018 |
| 1436161_at   | androgen-induced proliferation inhibitor                                   | Aprin         | 1.12  | 0.419 | -1.37 | 0.011 | -1.08 | 0.288 | -1.19 | 0.214 | -1.34 | 0.027 |
| 1435209_at   | cDNA sequence BC057079                                                     | BC057079      | -1.27 | 0.145 | -1.84 | 0.051 | -1.15 | 0.117 | -1.11 | 0.340 | -1.34 | 0.007 |
| 1455609_at   | RIKEN cDNA C030025P15 gene                                                 | C030025P15Rik | -1.1  | 0.401 | -1.42 | 0.207 | -1.04 | 0.820 | -1.31 | 0.126 | -1.34 | 0.021 |
| 1451504_at   | coiled-coil-helix-coiled-coil-helix domain containing 3                    | Chchd3        | 1.43  | 0.467 | 1.04  | 0.646 | -1.14 | 0.025 | -1.05 | 0.213 | -1.34 | 0.010 |
| 1432462_a_at | cofactor required for Sp1 transcriptional activation, subunit 8            | Crsp8         | 3.66  | 0.324 | 2.29  | 0.583 | -1.23 | 0.115 | -1.29 | 0.078 | -1.34 | 0.024 |
| 1429612_at   | echinoderm microtubule associated protein like 4                           | Eml4          | 1.03  | 0.766 | -1.06 | 0.475 | -1.09 | 0.239 | -1.06 | 0.370 | -1.34 | 0.028 |
| 1456698_s_at | heterogeneous nuclear ribonucleoprotein D-like                             | Hnrpd1        | -1.32 | 0.291 | -1.5  | 0.199 | -1.24 | 0.146 | -1.56 | 0.012 | -1.34 | 0.031 |
| 1419109_at   | histidine rich calcium binding protein                                     | Hrc           | 1.27  | 0.594 | 1.04  | 0.960 | -1.22 | 0.234 | 1.13  | 0.668 | -1.34 | 0.016 |
| 1433758_at   | nischarin                                                                  | Nisch         | 1.08  | 0.145 | -1.02 | 0.743 | -1.11 | 0.425 | 1.05  | 0.503 | -1.34 | 0.037 |
| 1460729_at   | Rho-associated coiled-coil containing protein kinase 1                     | Rock1         | -1.01 | 0.911 | -1.18 | 0.118 | -1.05 | 0.413 | -1.31 | 0.006 | -1.34 | 0.017 |
| 1420492_s_at | submaxillary gland androgen regulated protein 1 /// submaxillary gland anc | Smr1 /// Smr3 | -1.4  | 0.303 | 1.21  | 0.813 | -1.03 | 0.671 | -1.45 | 0.080 | -1.34 | 0.030 |
| 1450663_at   | thrombospondin 2                                                           | Thbs2         | 1.21  | 0.786 | -1.17 | 0.325 | -1.03 | 0.697 | -1.04 | 0.444 | -1.34 | 0.022 |
| 1419898_s_at | zinc finger CCCH type containing 7 A                                       | Zc3h7a        | 1.27  | 0.203 | 1.03  | 0.778 | -1.09 | 0.351 | 1.02  | 0.911 | -1.34 | 0.029 |
| 1417792_at   | zinc finger, matrin-like                                                   | Zfml          | 1.05  | 0.488 | 1.16  | 0.332 | -1.24 | 0.153 | -1.06 | 0.385 | -1.34 | 0.047 |
| 1452376_at   | zinc finger protein 444                                                    | Zfp444        | 3.68  | 0.343 | 7.03  | 0.143 | 1.03  | 0.945 | 1.11  | 0.243 | -1.34 | 0.016 |
| 1429355_at   | RIKEN cDNA 3300001K11 gene                                                 | 3300001K11Rik | 1.23  | 0.413 | -1.07 | 0.731 | -1.18 | 0.295 | 1.8   | 0.359 | -1.33 | 0.008 |
| 1452009_at   | RIKEN cDNA 9130422G05 gene                                                 | 9130422G05Rik | 1.1   | 0.566 | -1.38 | 0.131 | -1.2  | 0.022 | -1.28 | 0.014 | -1.33 | 0.005 |
| 1442358_at   | expressed sequence AA409587                                                | AA409587      | 1.38  | 0.140 | 1.64  | 0.138 | 1.06  | 0.986 | 1.1   | 0.449 | -1.33 | 0.010 |
| 1435543_at   | adenomatosis polyposis coli                                                | Apc           | -1.03 | 0.531 | -1.05 | 0.534 | -1.04 | 0.666 | -1.07 | 0.486 | -1.33 | 0.017 |
| 1426418_at   | atonal homolog 8 (Drosophila)                                              | Atoh8         | 1.88  | 0.509 | 1.2   | 0.568 | -1.22 | 0.040 | -1.17 | 0.099 | -1.33 | 0.034 |
| 1419178_at   | CD3 antigen, gamma polypeptide                                             | Cd3g          | 1.63  | 0.273 | 1.96  | 0.365 | 1.27  | 0.698 | 1.19  | 0.883 | -1.33 | 0.044 |
| 1428982_at   | RIKEN cDNA D530031C13 gene                                                 | D530031C13Rik | 1.11  | 0.319 | -1.04 | 0.659 | -1.12 | 0.245 | -1.21 | 0.095 | -1.33 | 0.010 |
| 1451708_at   | G protein-coupled receptor 33                                              | Gpr33         | 1.06  | 0.931 | 1.06  | 0.806 | -1.19 | 0.144 | 1.19  | 0.932 | -1.33 | 0.035 |
| 1418492_at   | gremlin 2 homolog, cysteine knot superfamily (Xenopus laevis)              | Grem2         | 1.13  | 0.632 | -1.16 | 0.309 | -1.26 | 0.031 | -1.27 | 0.013 | -1.33 | 0.004 |
| 1422445_at   | integrin alpha 6                                                           | Itga6         | 1.02  | 0.995 | -1.67 | 0.034 | -1.16 | 0.047 | -1.41 | 0.002 | -1.33 | 0.008 |
| 1417324_at   | microtubule associated serine/threonine kinase 2                           | Mast2         | 1.01  | 0.920 | -1.48 | 0.002 | -1.3  | 0.009 | -1.21 | 0.003 | -1.33 | 0.004 |
| 1439774_at   | paired related homeobox 1                                                  | Prrx1         | -1.1  | 0.501 | -1.33 | 0.206 | -1.14 | 0.182 | -1.4  | 0.010 | -1.33 | 0.028 |
| 1417401_at   | retinoic acid induced 14                                                   | Rai14         | 1.34  | 0.362 | -1.08 | 0.349 | -1.44 | 0.028 | -1.19 | 0.179 | -1.33 | 0.047 |
| 1457613_at   | Regulatory factor X domain containing 1                                    | Rfxdc1        | -1.12 | 0.453 | -1.18 | 0.492 | 1.25  | 0.852 | -1.08 | 0.627 | -1.33 | 0.032 |
| 1434958_at   | sacsin                                                                     | Sacs          | -1.09 | 0.493 | -1.26 | 0.224 | -1.21 | 0.070 | -1.11 | 0.164 | -1.33 | 0.017 |
| 1426972_at   | SEC24 related gene family, member D (S. cerevisiae)                        | Sec24d        | 1.5   | 0.429 | 1.13  | 0.627 | -1.21 | 0.081 | -1.2  | 0.026 | -1.33 | 0.002 |
| 1428251_at   | SMC hinge domain containing 1                                              | Smchd1        | -1.11 | 0.464 | -1.52 | 0.067 | -1.19 | 0.040 | -1.39 | 0.035 | -1.33 | 0.015 |
| 1455829_at   | ubiquitin specific peptidase 14                                            | Usp14         | 1.07  | 0.114 | -1.06 | 0.480 | -1.1  | 0.117 | 1     | 0.976 | -1.33 | 0.017 |
| 1452868_at   | ubiquitin specific peptidase 24                                            | Usp24         | -1    | 0.854 | -1.08 | 0.068 | -1.22 | 0.000 | -1.48 | 0.002 | -1.33 | 0.005 |

|              |                                                                                |                    |       |       |       |       |       |       |       |       |       |       |
|--------------|--------------------------------------------------------------------------------|--------------------|-------|-------|-------|-------|-------|-------|-------|-------|-------|-------|
| 1427894_at   | vasorin                                                                        | Vasn               | -1.23 | 0.033 | -1.29 | 0.091 | -1.19 | 0.031 | -1.1  | 0.118 | -1.33 | 0.034 |
| 1456705_at   | Zinc finger protein 532                                                        | Zfp532             | -1.48 | 0.096 | -1.63 | 0.041 | 1.04  | 0.566 | 1.43  | 0.186 | -1.33 | 0.032 |
| 1457746_at   | RIKEN cDNA 2610028H07 gene                                                     | 2610028H07Rik      | 2.85  | 0.112 | 1.73  | 0.402 | -1.02 | 0.688 | 1.17  | 0.077 | -1.32 | 0.030 |
| 1430404_at   | RIKEN cDNA 4833416J08 gene                                                     | 4833416J08Rik      | -1.23 | 0.391 | -1.44 | 0.346 | 1.05  | 0.899 | -1.01 | 0.937 | -1.32 | 0.006 |
| 1434797_at   | RIKEN cDNA 6720469N11 gene                                                     | 6720469N11Rik      | -1.03 | 0.586 | -1.26 | 0.044 | -1.28 | 0.066 | -1.35 | 0.003 | -1.32 | 0.010 |
| 1450072_at   | ash1 (absent, small, or homeotic)-like (Drosophila)                            | Ash1l              | -1.11 | 0.394 | -1.11 | 0.392 | -1.12 | 0.228 | -1.23 | 0.080 | -1.32 | 0.005 |
| 1419922_s_at | attractin like 1                                                               | Atrnl1             | -1.14 | 0.030 | -1.39 | 0.048 | -1.18 | 0.109 | -1.17 | 0.261 | -1.32 | 0.013 |
| 1451382_at   | ChaC, cation transport regulator-like 1 (E. coli)                              | Chac1              | -1.22 | 0.007 | -2.44 | 0.001 | -1.18 | 0.052 | -1.24 | 0.002 | -1.32 | 0.001 |
| 1437349_at   | cytoskeleton associated protein 5                                              | Ckap5              | 1.68  | 0.291 | 1.47  | 0.830 | -1.16 | 0.088 | -1.14 | 0.034 | -1.32 | 0.030 |
| 1448582_at   | catenin, beta like 1                                                           | Ctnnb1             | -1.06 | 0.461 | -1.43 | 0.059 | -1.13 | 0.065 | -1.14 | 0.131 | -1.32 | 0.015 |
| 1428384_at   | DNA segment, Chr 4, Brigham & Women's Genetics 0951 expressed                  | D4Bwg0951e         | 1.49  | 0.399 | 1.15  | 0.774 | -1.24 | 0.015 | -1.09 | 0.051 | -1.32 | 0.002 |
| 1453851_a_at | growth arrest and DNA-damage-inducible 45 gamma                                | Gadd45g            | 1.03  | 0.571 | -1.08 | 0.152 | -1.21 | 0.101 | -1.2  | 0.018 | -1.32 | 0.004 |
| 1458351_s_at | kelch-like 2, Mayven (Drosophila)                                              | Klhl2              | -1.3  | 0.327 | -1.8  | 0.161 | -1.1  | 0.165 | -1.46 | 0.011 | -1.32 | 0.046 |
| 1448487_at   | leucine rich repeat (in FLII) interacting protein 1                            | Lrrfip1            | 1.06  | 0.425 | -1.21 | 0.051 | -1.13 | 0.030 | -1.09 | 0.020 | -1.32 | 0.003 |
| 1452620_at   | phosphoenolpyruvate carboxykinase 2 (mitochondrial)                            | Pck2               | -1.16 | 0.276 | -1.15 | 0.372 | -1.1  | 0.446 | 1.07  | 0.757 | -1.32 | 0.050 |
| 1437295_at   | protein kinase N2                                                              | Pkn2               | 1.19  | 0.183 | -1.04 | 0.510 | -1.27 | 0.024 | -1.33 | 0.016 | -1.32 | 0.021 |
| 1441386_at   | Rap guanine nucleotide exchange factor (GEF) 1                                 | Rapgef1            | 1.34  | 0.360 | -1.16 | 0.371 | 1.05  | 0.817 | 1.16  | 0.174 | -1.32 | 0.028 |
| 1460706_s_at | RER1 retention in endoplasmic reticulum 1 homolog (S. cerevisiae)              | Rer1               | -1.26 | 0.240 | -1.13 | 0.445 | 1.1   | 0.590 | -1.04 | 0.667 | -1.32 | 0.001 |
| 1452862_at   | ras responsive element binding protein 1                                       | Rreb1              | 2.17  | 0.327 | 1.95  | 0.574 | -1.26 | 0.154 | -1.1  | 0.352 | -1.32 | 0.047 |
| 1455549_at   | SEC14 and spectrin domains 1                                                   | Sestd1             | -1.01 | 0.773 | -1.33 | 0.021 | -1.1  | 0.103 | -1.27 | 0.012 | -1.32 | 0.002 |
| 1429220_at   | WD40 repeat domain 85                                                          | Wdr85              | -1.07 | 0.417 | 1.07  | 0.797 | -1.16 | 0.419 | 1.26  | 0.411 | -1.32 | 0.037 |
| 1453029_s_at | RIKEN cDNA 1110059H15 gene                                                     | 1110059H15Rik      | -1.03 | 0.548 | -1.23 | 0.029 | -1.14 | 0.017 | -1.28 | 0.012 | -1.31 | 0.027 |
| 1435572_at   | RIKEN cDNA 2310014L17 gene                                                     | 2310014L17Rik      | -1.11 | 0.470 | -1.02 | 0.545 | -1.02 | 0.818 | 1.09  | 0.392 | -1.31 | 0.050 |
| 1458706_at   | RIKEN cDNA 2610035D17 gene                                                     | 2610035D17Rik      | 1.05  | 0.865 | -1.28 | 0.292 | 1.5   | 0.722 | -1.26 | 0.078 | -1.31 | 0.010 |
| 1425913_a_at | RIKEN cDNA 2810022L02 gene                                                     | 2810022L02Rik      | 1.14  | 0.835 | -1.58 | 0.032 | -1.12 | 0.089 | -1.25 | 0.024 | -1.31 | 0.028 |
| 1460712_s_at | adaptor protein complex AP-1, gamma 1 subunit                                  | Ap1g1              | -1.19 | 0.254 | -1.13 | 0.053 | -1.03 | 0.569 | -1.22 | 0.028 | -1.31 | 0.008 |
| 1424770_at   | caldesmon 1                                                                    | Cald1              | -1.18 | 0.327 | -1.51 | 0.043 | -1.42 | 0.036 | -1.15 | 0.077 | -1.31 | 0.001 |
| 1451154_a_at | CUG triplet repeat, RNA binding protein 2                                      | Cugbp2             | -1.3  | 0.252 | -2.2  | 0.047 | -1.19 | 0.037 | -1.3  | 0.003 | -1.31 | 0.018 |
| 1434454_at   | DNA segment, Chr 16, Wayne State University 65, expressed                      | D16Wvsu65e         | 1.52  | 0.378 | -1.01 | 0.925 | 1.19  | 0.202 | -1.27 | 0.092 | -1.31 | 0.050 |
| 1441229_at   | RIKEN cDNA D230019N24 gene                                                     | D230019N24Rik      | -1.38 | 0.189 | 1.17  | 0.843 | 1.08  | 0.748 | 1.05  | 0.699 | -1.31 | 0.001 |
| 1439493_at   | RIKEN cDNA D630040G17 gene /// similar to zinc finger protein 64 (predic       | D630040G17Rik //   | -1.16 | 0.298 | -1.58 | 0.036 | -1.24 | 0.041 | -1.57 | 0.003 | -1.31 | 0.047 |
| 1434285_at   | FERM domain containing 4A                                                      | Frm4a              | -1.07 | 0.386 | -1.15 | 0.109 | -1.26 | 0.017 | -1.27 | 0.077 | -1.31 | 0.042 |
| 1458566_at   | G patch domain containing 2                                                    | Gpatc2             | 1.25  | 0.735 | 1.22  | 0.784 | -1.25 | 0.278 | -1.45 | 0.213 | -1.31 | 0.008 |
| 1420420_at   | hydroxyacid oxidase 1, liver                                                   | Hao1               | 1.28  | 0.669 | -1.16 | 0.410 | -1.46 | 0.280 | -1.32 | 0.226 | -1.31 | 0.014 |
| 1438307_at   | High mobility group box 2                                                      | Hmgb2              | -1.09 | 0.510 | -1.15 | 0.449 | 1.17  | 0.310 | 1.07  | 0.634 | -1.31 | 0.025 |
| 1452238_at   | HIV-1 Rev binding protein                                                      | Hrb                | 1.11  | 0.205 | -1.03 | 0.465 | -1.14 | 0.318 | -1.16 | 0.059 | -1.31 | 0.031 |
| 1456434_x_at | heat shock protein 8                                                           | Hspb8              | -1.15 | 0.462 | -1.08 | 0.464 | 1.18  | 0.734 | -1.05 | 0.595 | -1.31 | 0.040 |
| 1433605_at   | inositol polyphosphate-5-phosphatase A                                         | Inpp5a             | -1.08 | 0.409 | -1.43 | 0.015 | -1.23 | 0.000 | -1.25 | 0.001 | -1.31 | 0.021 |
| 1419308_at   | inversin                                                                       | Invs               | -1.14 | 0.426 | -2.63 | 0.083 | -1.27 | 0.038 | -1.09 | 0.372 | -1.31 | 0.021 |
| 1433747_at   | leucyl/cystinyl aminopeptidase                                                 | Lnpep              | 1.04  | 0.394 | -1.34 | 0.036 | -1.21 | 0.073 | -1.12 | 0.105 | -1.31 | 0.010 |
| 1455941_s_at | mitogen activated protein kinase kinase 5                                      | Map2k5             | -1.32 | 0.257 | -2.33 | 0.102 | -1.22 | 0.016 | -1.45 | 0.004 | -1.31 | 0.030 |
| 1423508_at   | MYST histone acetyltransferase monocytic leukemia 4                            | Myst4              | 1.01  | 0.712 | -1.6  | 0.002 | -1    | 0.710 | -1.13 | 0.300 | -1.31 | 0.029 |
| 1431086_s_at | protein-L-isoaspartate (D-aspartate) O-methyltransferase 1                     | Pcmt1              | -1.07 | 0.539 | -1.12 | 0.464 | -1.17 | 0.012 | -1.11 | 0.061 | -1.31 | 0.002 |
| 1434181_at   | pleckstrin homology domain containing, family C (with FERM domain) mer         | Plekhc1            | 1.19  | 0.374 | -1.2  | 0.223 | -1.25 | 0.008 | -1.17 | 0.011 | -1.31 | 0.039 |
| 1450122_at   | protein tyrosine phosphatase, receptor type, G                                 | Ptprg              | 3.12  | 0.668 | 2.32  | 0.778 | -1.3  | 0.016 | -1.16 | 0.195 | -1.31 | 0.040 |
| 1434360_s_at | protein tyrosine phosphatase, receptor type, G /// similar to protein tyrosine | Ptprg /// LOC6326t | 1.42  | 0.865 | -1.02 | 0.334 | -1.27 | 0.045 | -1.24 | 0.063 | -1.31 | 0.007 |
| 1418017_at   | pumilio 2 (Drosophila)                                                         | Pum2               | 1.32  | 0.311 | 1.27  | 0.739 | -1.09 | 0.320 | -1.11 | 0.048 | -1.31 | 0.047 |
| 1437161_x_at | RNA binding protein gene with multiple splicing                                | Rbpms              | -1.03 | 0.655 | -1.59 | 0.019 | -1.27 | 0.017 | -1.33 | 0.007 | -1.31 | 0.014 |
| 1455819_at   | ROD1 regulator of differentiation 1 (S. pombe)                                 | Rod1               | 1.08  | 0.142 | -1.18 | 0.169 | -1.17 | 0.189 | -1.1  | 0.187 | -1.31 | 0.014 |
| 1428760_at   | small nuclear RNA activating complex, polypeptide 3                            | Snapc3             | 1.15  | 0.334 | 1.2   | 0.393 | -1.18 | 0.087 | -1.09 | 0.139 | -1.31 | 0.008 |
| 1454938_at   | sorting nexin 13                                                               | Snx13              | 1.19  | 0.129 | -1.1  | 0.374 | -1.17 | 0.017 | -1.25 | 0.008 | -1.31 | 0.014 |
| 1435964_a_at | TAO kinase 3                                                                   | Taok3              | -1.36 | 0.326 | -1.6  | 0.253 | -1.07 | 0.475 | -1.29 | 0.002 | -1.31 | 0.008 |
| 1435292_at   | TBC1 domain family, member 4                                                   | Tbc1d4             | 1.39  | 0.683 | -2.18 | 0.033 | 2.62  | 0.734 | 1.76  | 0.325 | -1.31 | 0.023 |
| 1444004_at   | THO complex 2                                                                  | Thoc2              | -1.03 | 0.614 | -1.19 | 0.354 | -1.26 | 0.140 | -1.24 | 0.041 | -1.31 | 0.017 |
| 1427258_at   | tripartite motif protein 24                                                    | Trim24             | 1.05  | 0.838 | -1.05 | 0.664 | -1.07 | 0.046 | -1.27 | 0.030 | -1.31 | 0.009 |
| 1430535_at   | TSC22 domain family 2                                                          | Tsc22d2            | 1.02  | 0.986 | -1.31 | 0.060 | -1.23 | 0.021 | -1.32 | 0.000 | -1.31 | 0.000 |
| 1427163_at   | ubiquitin protein ligase E3 component n-recogin 2                              | Ubr2               | 1.24  | 0.436 | 1.21  | 0.306 | -1.2  | 0.049 | -1.15 | 0.012 | -1.31 | 0.011 |
| 1449095_at   | vacuolar protein sorting 54 (yeast)                                            | Vps54              | -1    | 0.790 | -1.2  | 0.112 | -1.04 | 0.312 | -1.04 | 0.384 | -1.31 | 0.042 |

|              |                                                                                         |               |       |       |       |       |       |       |       |       |       |       |
|--------------|-----------------------------------------------------------------------------------------|---------------|-------|-------|-------|-------|-------|-------|-------|-------|-------|-------|
| 1459490_at   | RIKEN cDNA 1110032E23 gene                                                              | 1110032E23Rik | 1.19  | 0.243 | 1.1   | 0.558 | -1.11 | 0.372 | 1.07  | 0.614 | -1.3  | 0.046 |
| 1435089_at   | RIKEN cDNA 201011101 gene                                                               | 201011101Rik  | 1.02  | 0.990 | -1.09 | 0.376 | -1.11 | 0.213 | -1.11 | 0.108 | -1.3  | 0.031 |
| 1453038_at   | RIKEN cDNA 4930422G04 gene                                                              | 4930422G04Rik | 2.23  | 0.261 | 2.2   | 0.185 | -1.13 | 0.107 | -1.08 | 0.379 | -1.3  | 0.028 |
| 1429999_at   | RIKEN cDNA 4933403M19 gene                                                              | 4933403M19Rik | 2.12  | 0.553 | 1.36  | 0.545 | 1.25  | 0.591 | 1.03  | 0.781 | -1.3  | 0.036 |
| 1428419_at   | RIKEN cDNA 5430411K18 gene                                                              | 5430411K18Rik | 1.04  | 0.516 | -1.08 | 0.255 | -1.11 | 0.030 | -1.15 | 0.043 | -1.3  | 0.014 |
| 1436795_at   | RIKEN cDNA 9630058J23 gene                                                              | 9630058J23Rik | -1.06 | 0.233 | -1.3  | 0.065 | -1.04 | 0.569 | -1.3  | 0.005 | -1.3  | 0.001 |
| 1439827_at   | a disintegrin-like and metallopeptidase (repolysin type) with thrombosponin-like domain | Adamts12      | 1.22  | 0.304 | -1.02 | 0.634 | -1.28 | 0.003 | -1.07 | 0.078 | -1.3  | 0.019 |
| 1436640_x_at | 1-acylglycerol-3-phosphate O-acyltransferase 1 (lysophosphatidic acid acyltransferase)  | Agpat4        | -1.12 | 0.373 | -1.41 | 0.232 | 1.01  | 0.968 | -1.23 | 0.008 | -1.3  | 0.039 |
| 1428369_s_at | Rho GTPase activating protein 21                                                        | Arhgap21      | -1.03 | 0.670 | -1.19 | 0.179 | -1.22 | 0.000 | -1.37 | 0.006 | -1.3  | 0.002 |
| 1454745_at   | Rho GTPase activating protein 29                                                        | Arhgap29      | 1.03  | 0.217 | -1.1  | 0.074 | -1.22 | 0.048 | -1.21 | 0.009 | -1.3  | 0.015 |
| 1449119_at   | ariadne homolog 2 (Drosophila)                                                          | Arih2         | 1.2   | 0.348 | 1.21  | 0.411 | -1.19 | 0.022 | -1.14 | 0.091 | -1.3  | 0.006 |
| 1426582_at   | activating transcription factor 2                                                       | Atf2          | -1.03 | 0.650 | -1.1  | 0.169 | -1.19 | 0.020 | -1.09 | 0.479 | -1.3  | 0.029 |
| 1456523_at   | expressed sequence C77713                                                               | C77713        | 1.61  | 0.624 | 1.13  | 0.488 | -1.28 | 0.002 | -1.25 | 0.032 | -1.3  | 0.003 |
| 1444787_at   | Chromodomain helicase DNA binding protein 1                                             | Chd1          | 1.03  | 0.834 | -1.03 | 0.886 | 2.71  | 0.726 | 1.03  | 0.869 | -1.3  | 0.024 |
| 1458984_at   | RIKEN cDNA E130308A19 gene                                                              | E130308A19Rik | -1.13 | 0.468 | -1.83 | 0.068 | 1.02  | 0.954 | -1.2  | 0.051 | -1.3  | 0.005 |
| 1417408_at   | coagulation factor III                                                                  | F3            | 1.05  | 0.896 | -1.15 | 0.186 | -1.14 | 0.051 | -1.26 | 0.024 | -1.3  | 0.026 |
| 1435985_at   | FERM, RhoGEF and pleckstrin domain protein 2                                            | Farp2         | -1.02 | 0.679 | -1.19 | 0.164 | -1.16 | 0.156 | -1.12 | 0.296 | -1.3  | 0.004 |
| 1433482_a_at | far upstream element (FUSE) binding protein 1                                           | Fubp1         | 1.08  | 0.679 | -1.15 | 0.179 | -1.28 | 0.016 | -1.16 | 0.030 | -1.3  | 0.009 |
| 1434158_at   | GDP-mannose 4, 6-dehydratase                                                            | Gmids         | -1.3  | 0.036 | -1.34 | 0.039 | -1.4  | 0.009 | -1.13 | 0.033 | -1.3  | 0.012 |
| 1424141_at   | HECT domain containing 1                                                                | Hectd1        | 1.44  | 0.207 | 1.21  | 0.479 | -1.13 | 0.177 | -1.02 | 0.572 | -1.3  | 0.015 |
| 1452360_a_at | jumonji, AT rich interactive domain 1A (Rbp2 like)                                      | Jarid1a       | 1.08  | 0.077 | 1.07  | 0.155 | -1.04 | 0.631 | -1.15 | 0.015 | -1.3  | 0.016 |
| 1423885_at   | laminin, gamma 1                                                                        | Lamc1         | 2.79  | 0.581 | 1.58  | 0.584 | -1.15 | 0.014 | -1.2  | 0.073 | -1.3  | 0.004 |
| 1427705_a_at | nuclear factor of kappa light chain gene enhancer in B-cells 1, p105                    | Nfkb1         | 1.08  | 0.418 | -1.06 | 0.673 | -1.27 | 0.005 | -1.25 | 0.007 | -1.3  | 0.009 |
| 1454851_at   | nuclear receptor subfamily 2, group C, member 2                                         | Nr2c2         | -1.13 | 0.161 | -1.36 | 0.021 | -1.22 | 0.096 | -1.36 | 0.014 | -1.3  | 0.001 |
| 1440223_at   | RNA binding motif protein 6                                                             | Rbm6          | 1.05  | 0.969 | -1.01 | 0.786 | -1.21 | 0.180 | -1.01 | 0.621 | -1.3  | 0.036 |
| 1421849_at   | stromal antigen 2                                                                       | Stag2         | 1.11  | 0.101 | -1.19 | 0.133 | -1.13 | 0.081 | -1.2  | 0.016 | -1.3  | 0.002 |
| 1419708_at   | wingless-related MMTV integration site 6                                                | Wnt6          | -1.29 | 0.316 | -1    | 0.614 | 1.42  | 0.190 | 1.04  | 0.918 | -1.3  | 0.048 |
| 1434846_at   | RIKEN cDNA 1700065A05 gene                                                              | 1700065A05Rik | 1.06  | 0.631 | -1.16 | 0.016 | -1.07 | 0.254 | -1.19 | 0.078 | -1.29 | 0.010 |
| 1444790_at   | RIKEN cDNA 1810005K13 gene                                                              | 1810005K13Rik | -1.08 | 0.487 | -1.09 | 0.495 | 1.06  | 0.821 | -1.15 | 0.349 | -1.29 | 0.012 |
| 1436729_at   | RIKEN cDNA 2600003E23 gene                                                              | 2600003E23Rik | 1.06  | 0.528 | -1.09 | 0.406 | -1.17 | 0.004 | -1.26 | 0.024 | -1.29 | 0.003 |
| 1439484_at   | RIKEN cDNA 4930431H11 gene                                                              | 4930431H11Rik | -1.02 | 0.711 | -1.01 | 0.881 | 1.24  | 0.645 | -1.08 | 0.264 | -1.29 | 0.011 |
| 1428971_at   | RIKEN cDNA 5730405I09 gene                                                              | 5730405I09Rik | 1.3   | 0.317 | 1.02  | 0.737 | -1.04 | 0.693 | -1.14 | 0.130 | -1.29 | 0.025 |
| 1452233_at   | ATP-binding cassette, sub-family C (CFTR/MRP), member 1                                 | Abcc1         | -1.01 | 0.811 | -1.22 | 0.119 | -1.23 | 0.010 | -1.16 | 0.035 | -1.29 | 0.016 |
| 1452415_at   | actinin, alpha 1                                                                        | Actn1         | 1.28  | 0.818 | -1    | 0.411 | -1.19 | 0.056 | -1.22 | 0.049 | -1.29 | 0.009 |
| 1436185_at   | expressed sequence AI314180                                                             | AI314180      | -1.09 | 0.433 | -1.35 | 0.210 | 1.16  | 0.334 | -1.12 | 0.290 | -1.29 | 0.026 |
| 1460573_at   | expressed sequence AI848100                                                             | AI848100      | 1.81  | 0.352 | 1.57  | 0.834 | -1    | 0.926 | -1.1  | 0.233 | -1.29 | 0.014 |
| 1451526_at   | Rho GTPase activating protein 12                                                        | Arhgap12      | -1.12 | 0.450 | -1.3  | 0.253 | -1.17 | 0.175 | -1.2  | 0.010 | -1.29 | 0.013 |
| 1416961_at   | budding uninhibited by benzimidazoles 1 homolog, beta (S. cerevisiae)                   | Bub1b         | 1.18  | 0.539 | 1     | 0.711 | -1.16 | 0.207 | 1.07  | 0.410 | -1.29 | 0.016 |
| 1460389_at   | cyclin-dependent kinase 8                                                               | Cdk8          | 1.01  | 0.512 | -1.08 | 0.256 | -1.13 | 0.074 | -1.11 | 0.140 | -1.29 | 0.025 |
| 1434251_at   | CCR4-NOT transcription complex, subunit 1                                               | Cnot1         | 1.1   | 0.103 | -1    | 0.856 | -1.13 | 0.139 | -1.19 | 0.006 | -1.29 | 0.001 |
| 1456576_x_at | CCR4-NOT transcription complex, subunit 2                                               | Cnot2         | -1.12 | 0.436 | -1.02 | 0.501 | -1.05 | 0.577 | -1.14 | 0.134 | -1.29 | 0.006 |
| 1438891_at   | Catenin (cadherin associated protein), delta 2                                          | Ctnnd2        | 1.43  | 0.039 | 1.77  | 0.200 | -1.26 | 0.386 | 1.19  | 0.511 | -1.29 | 0.009 |
| 1427941_at   | Dicer1, Dcr-1 homolog (Drosophila)                                                      | Dicer1        | -1.13 | 0.217 | -1.07 | 0.392 | -1.18 | 0.069 | -1.05 | 0.459 | -1.29 | 0.004 |
| 1451977_at   | dual-specificity tyrosine-(Y)-phosphorylation regulated kinase 1a                       | Dyrk1a        | 1.65  | 0.575 | 1.47  | 0.658 | -1.3  | 0.009 | -1.28 | 0.022 | -1.29 | 0.035 |
| 1448223_at   | fatso                                                                                   | Fto           | -1.12 | 0.224 | -1.74 | 0.002 | -1.23 | 0.030 | -1.29 | 0.043 | -1.29 | 0.041 |
| 1428774_at   | glypican 6                                                                              | Gpc6          | -1.15 | 0.095 | -1.43 | 0.036 | -1.22 | 0.012 | -1.27 | 0.054 | -1.29 | 0.008 |
| 1452424_at   | G protein-coupled receptor 23                                                           | Gpr23         | 2.62  | 0.387 | 1.42  | 0.833 | -1.02 | 0.460 | 1.58  | 0.067 | -1.29 | 0.040 |
| 1454905_at   | inhibitor of Bruton agammaglobulinemia tyrosine kinase                                  | Ibkp          | -1.02 | 0.660 | -1.2  | 0.204 | -1.2  | 0.082 | -1.09 | 0.455 | -1.29 | 0.042 |
| 1422611_s_at | insulin-like growth factor 2 mRNA binding protein 3                                     | Igf2bp3       | 2.84  | 0.499 | 1.84  | 0.831 | 1.08  | 0.510 | -1.24 | 0.003 | -1.29 | 0.044 |
| 1451985_at   | leucine-rich repeat kinase 1                                                            | Lrrk1         | -1.11 | 0.205 | -1.23 | 0.097 | -1.23 | 0.033 | -1.15 | 0.112 | -1.29 | 0.027 |
| 1426369_at   | male sterility domain containing 2                                                      | Mlst2         | -1.01 | 0.808 | -1.35 | 0.024 | -1.09 | 0.270 | -1.16 | 0.134 | -1.29 | 0.037 |
| 1418664_at   | multiple PDZ domain protein                                                             | Mpdz          | -1.08 | 0.341 | -1.4  | 0.031 | -1.15 | 0.168 | -1.17 | 0.055 | -1.29 | 0.046 |
| 1423428_at   | receptor tyrosine kinase-like orphan receptor 2                                         | Ror2          | -1.29 | 0.243 | -1.85 | 0.089 | -1.14 | 0.299 | -1.69 | 0.016 | -1.29 | 0.037 |
| 1432029_a_at | stromal membrane-associated protein 1                                                   | Smap1         | 1.9   | 0.307 | 1.64  | 0.635 | -1.03 | 0.701 | -1.07 | 0.162 | -1.29 | 0.006 |
| 1429288_x_at | syntaxin 18                                                                             | Stx18         | 1     | 0.844 | -1.16 | 0.130 | -1.14 | 0.144 | -1.05 | 0.459 | -1.29 | 0.017 |
| 1436982_at   | trinucleotide repeat containing 6b                                                      | Tnrc6b        | 1.03  | 0.876 | -1.34 | 0.049 | -1.09 | 0.190 | -1.23 | 0.033 | -1.29 | 0.015 |
| 1439411_a_at | exportin 7                                                                              | Xpo7          | -1.23 | 0.378 | -1.64 | 0.211 | -1.08 | 0.053 | -1.21 | 0.040 | -1.29 | 0.003 |
| 1429807_at   | RIKEN cDNA 1700011H22 gene                                                              | 1700011H22Rik | -1.1  | 0.469 | 1.95  | 0.273 | 1.79  | 0.213 | 1.13  | 0.313 | -1.28 | 0.020 |



|              |                                                                             |                   |       |       |       |       |       |       |       |       |       |       |
|--------------|-----------------------------------------------------------------------------|-------------------|-------|-------|-------|-------|-------|-------|-------|-------|-------|-------|
| 1426708_at   | anthrax toxin receptor 2                                                    | Antrx2            | 1.08  | 0.542 | -1.35 | 0.094 | -1.19 | 0.029 | -1.16 | 0.038 | -1.28 | 0.007 |
| 1426967_at   | axin 1                                                                      | Axin1             | 3.09  | 0.473 | 4.28  | 0.262 | -1.05 | 0.151 | -1    | 0.909 | -1.28 | 0.018 |
| 1434459_at   | cDNA sequence BC057627                                                      | BC057627          | -1.01 | 0.624 | -1.12 | 0.053 | -1.06 | 0.527 | -1.09 | 0.155 | -1.28 | 0.049 |
| 1437022_at   | RIKEN cDNA D130059P03 gene                                                  | D130059P03Rik     | 1.03  | 0.584 | -1.02 | 0.524 | 1.05  | 0.573 | -1.04 | 0.068 | -1.28 | 0.003 |
| 1458769_at   | DNA segment, Chr 7, ERATO Doi 558, expressed                                | D7Erd558e         | -1.38 | 0.284 | -1.23 | 0.343 | 1.24  | 0.092 | -2.17 | 0.115 | -1.28 | 0.024 |
| 1426833_at   | eukaryotic translation initiation factor 4 gamma, 3                         | Eif4g3            | -1.14 | 0.128 | -1.39 | 0.027 | -1.19 | 0.063 | -1.16 | 0.220 | -1.28 | 0.048 |
| 1437363_at   | homer homolog 1 (Drosophila)                                                | Homer1            | -1.04 | 0.442 | -1.56 | 0.026 | -1.13 | 0.089 | -1.02 | 0.550 | -1.28 | 0.012 |
| 1450992_a_at | myeloid ectotropic viral integration site 1                                 | Meis1             | -1    | 0.849 | -1.92 | 0.006 | -1.43 | 0.029 | -1.49 | 0.077 | -1.28 | 0.049 |
| 1443279_at   | Nemo like kinase                                                            | Nlk               | -1.13 | 0.398 | -1.36 | 0.380 | 1.42  | 0.806 | 1.51  | 0.376 | -1.28 | 0.047 |
| 1433768_at   | palladin, cytoskeletal associated protein                                   | Palld             | 1.23  | 0.688 | -1.11 | 0.305 | -1.21 | 0.037 | -1.27 | 0.008 | -1.28 | 0.000 |
| 1426614_at   | protein kinase C binding protein 1                                          | Prkcbp1           | -1.06 | 0.509 | -1.05 | 0.539 | -1.08 | 0.324 | -1.07 | 0.240 | -1.28 | 0.031 |
| 1418758_a_at | pleckstrin homology, Sec7 and coiled-coil domains 3                         | Pscd3             | 1.11  | 0.530 | -1.15 | 0.333 | -1.15 | 0.056 | -1.16 | 0.016 | -1.28 | 0.002 |
| 1415850_at   | RAS p21 protein activator 3                                                 | Rasa3             | 1.04  | 0.391 | -1.45 | 0.004 | -1.09 | 0.244 | -1.18 | 0.020 | -1.28 | 0.015 |
| 1426912_at   | ring finger and WD repeat domain 2 /// similar to constitutive photomorpho  | Rfwd2 /// LOC6212 | 1.22  | 0.333 | 1.05  | 0.966 | -1.2  | 0.018 | -1.17 | 0.014 | -1.28 | 0.004 |
| 1454991_at   | solute carrier family 7 (cationic amino acid transporter, y+ system), membe | Slc7a1            | -1.15 | 0.265 | -1.4  | 0.053 | -1.11 | 0.124 | -1.12 | 0.022 | -1.28 | 0.011 |
| 1456479_at   | sorting nexin family member 30                                              | Snx30             | -1.02 | 0.746 | -1    | 0.965 | -1.06 | 0.074 | -1.26 | 0.004 | -1.28 | 0.000 |
| 1448782_at   | thioredoxin domain containing 11                                            | Txnbc11           | 1.07  | 0.348 | -1.16 | 0.074 | -1.14 | 0.016 | -1.03 | 0.475 | -1.28 | 0.002 |
| 1428861_at   | RIKEN cDNA 4631422O05 gene /// similar to downregulated in ovarian ca       | 4631422O05Rik /// | 1.5   | 0.614 | 1.18  | 0.626 | -1.22 | 0.003 | -1.11 | 0.039 | -1.27 | 0.039 |
| 1423177_a_at | abl-interactor 1                                                            | Abi1              | 1.17  | 0.508 | 1.04  | 0.806 | -1.12 | 0.161 | -1.3  | 0.002 | -1.27 | 0.005 |
| 1418135_at   | AF4/FMR2 family, member 1                                                   | Aff1              | -1.14 | 0.218 | -1.28 | 0.111 | -1.1  | 0.061 | -1.34 | 0.009 | -1.27 | 0.001 |
| 1443665_at   | Expressed sequence A1852444                                                 | A1852444          | -1.07 | 0.549 | -1.53 | 0.049 | 1.1   | 0.191 | -1.27 | 0.131 | -1.27 | 0.034 |
| 1431848_at   | angiotensin-like 2                                                          | Angptl2           | 1.45  | 0.410 | 1.22  | 0.790 | -1.13 | 0.394 | 1.01  | 0.959 | -1.27 | 0.003 |
| 1425492_at   | bone morphogenetic protein receptor, type 1A                                | Bmpr1a            | 1.09  | 0.375 | -1.07 | 0.531 | 1.01  | 0.992 | -1.1  | 0.031 | -1.27 | 0.016 |
| 1454874_at   | BTB (POZ) domain containing 7                                               | Btd7              | 1.05  | 0.276 | -1.01 | 0.788 | -1.02 | 0.663 | -1.21 | 0.015 | -1.27 | 0.007 |
| 1452476_at   | calcium channel, voltage-dependent, beta 2 subunit                          | Cacnb2            | 1.14  | 0.346 | 1.45  | 0.512 | 1.32  | 0.627 | 1     | 0.924 | -1.27 | 0.037 |
| 1435220_s_at | CDC42 small effector 2                                                      | Cdc42se2          | 1.02  | 0.678 | 1     | 0.955 | 1.02  | 0.137 | -1.13 | 0.022 | -1.27 | 0.006 |
| 1418599_at   | procollagen, type XI, alpha 1                                               | Col11a1           | -1.15 | 0.385 | -1.55 | 0.301 | -1.11 | 0.349 | -1.04 | 0.384 | -1.27 | 0.043 |
| 1434038_at   | DnaJ (Hsp40) homolog, subfamily C, member 13                                | Dnajc13           | 1.02  | 0.591 | -1.2  | 0.082 | -1.21 | 0.009 | -1.14 | 0.027 | -1.27 | 0.000 |
| 1425462_at   | F-box and WD-40 domain protein 11                                           | Fbxw11            | 1.09  | 0.436 | 1.08  | 0.678 | -1.22 | 0.043 | -1.3  | 0.004 | -1.27 | 0.011 |
| 1444185_at   | homocysteine-inducible, endoplasmic reticulum stress-inducible, ubiquitin-  | Herpud1           | 1.05  | 0.857 | -2.02 | 0.023 | -1.22 | 0.004 | -1.05 | 0.109 | -1.27 | 0.003 |
| 1450730_at   | heparan sulfate 2-O-sulfotransferase 1                                      | Hs2st1            | 1.03  | 0.695 | -1.27 | 0.006 | -1.2  | 0.003 | -1.04 | 0.474 | -1.27 | 0.007 |
| 1415769_at   | itchy                                                                       | Itch              | 1.09  | 0.401 | -1.06 | 0.625 | -1.22 | 0.221 | -1.2  | 0.127 | -1.27 | 0.000 |
| 1443947_at   | LIM and senescent cell antigen-like domains 1                               | Lims1             | -1.76 | 0.115 | -1.1  | 0.579 | 1.01  | 0.618 | -1.08 | 0.498 | -1.27 | 0.018 |
| 1453836_a_at | monoglyceride lipase                                                        | Mgll              | 1.56  | 0.450 | 1.05  | 0.674 | -1.28 | 0.137 | -1.09 | 0.229 | -1.27 | 0.020 |
| 1460436_at   | N-deacetylase/N-sulfotransferase (heparan glucosaminyl) 1                   | Ndst1             | -1.04 | 0.367 | -1.12 | 0.221 | -1.17 | 0.008 | -1.12 | 0.045 | -1.27 | 0.049 |
| 1442834_at   | Protein phosphatase 4, regulatory subunit 2                                 | Ppp4r2            | -1.05 | 0.533 | -1.47 | 0.125 | -1.21 | 0.097 | 1.03  | 0.719 | -1.27 | 0.037 |
| 1432057_a_at | PR domain containing 5                                                      | Prdm5             | 1.02  | 0.684 | -1.34 | 0.097 | -1.33 | 0.003 | -1.36 | 0.023 | -1.27 | 0.031 |
| 1454722_at   | phosphatase and tensin homolog                                              | Pten              | 1.62  | 0.389 | 1.4   | 0.628 | -1.18 | 0.158 | -1.06 | 0.233 | -1.27 | 0.043 |
| 1426504_a_at | ring finger protein 121                                                     | Rnf121            | 1.18  | 0.325 | 1.13  | 0.275 | -1.08 | 0.213 | -1.06 | 0.323 | -1.27 | 0.018 |
| 1452445_at   | solute carrier family 41, member 2                                          | Slc41a2           | 1.17  | 0.245 | -1.23 | 0.043 | -1.15 | 0.024 | -1.13 | 0.022 | -1.27 | 0.002 |
| 1426457_at   | sarcolemma associated protein                                               | Slmap             | 1.17  | 0.296 | -1.03 | 0.724 | -1.12 | 0.070 | -1.18 | 0.022 | -1.27 | 0.004 |
| 1450923_at   | transforming growth factor, beta 2                                          | Tgfb2             | -1.01 | 0.934 | -1.63 | 0.002 | -1.18 | 0.125 | -1.21 | 0.022 | -1.27 | 0.025 |
| 1454889_x_at | transmembrane and coiled coil domains 3                                     | Tmcc3             | 1.03  | 0.784 | -1.07 | 0.508 | -1.11 | 0.179 | -1.13 | 0.117 | -1.27 | 0.024 |
| 1434724_at   | ubiquitin specific peptidase 31                                             | Usp31             | 1.02  | 0.746 | -1.14 | 0.004 | 1.01  | 0.788 | -1.09 | 0.229 | -1.27 | 0.046 |
| 1435636_at   | RIKEN cDNA 2310051F07 gene                                                  | 2310051F07Rik     | 1.48  | 0.549 | 1.45  | 0.814 | -1.04 | 0.486 | -1.06 | 0.138 | -1.26 | 0.006 |
| 1441005_at   | RIKEN cDNA 2610304G08 gene                                                  | 2610304G08Rik     | -1.09 | 0.317 | 2.99  | 0.740 | 1.29  | 0.750 | 1.5   | 0.228 | -1.26 | 0.038 |
| 1428122_s_at | RIKEN cDNA 2610528K11 gene                                                  | 2610528K11Rik     | -1.27 | 0.117 | -2.3  | 0.050 | -1.08 | 0.365 | -1.24 | 0.057 | -1.26 | 0.049 |
| 1455159_at   | RIKEN cDNA 2900057D21 gene                                                  | 2900057D21Rik     | -1.02 | 0.639 | -1.52 | 0.076 | -1.05 | 0.492 | -1.12 | 0.375 | -1.26 | 0.021 |
| 1420679_a_at | androgen-induced 1                                                          | Aig1              | -1.03 | 0.730 | -1.63 | 0.032 | -1.14 | 0.180 | -1.16 | 0.011 | -1.26 | 0.000 |
| 1459234_at   | Arachidonate 5-lipoxygenase activating protein                              | Alox5ap           | -1.42 | 0.275 | -1.49 | 0.199 | 1.15  | 0.980 | -1.35 | 0.136 | -1.26 | 0.048 |
| 1429193_at   | ankyrin repeat and IBR domain containing 1                                  | Ankib1            | 1.02  | 0.716 | -1.19 | 0.053 | -1.08 | 0.034 | -1.21 | 0.009 | -1.26 | 0.028 |
| 1456917_at   | ADP-ribosylation factor guanine nucleotide-exchange factor 1(brefeldin A-i  | Arfgef1           | -1    | 0.715 | 1.03  | 0.799 | 1.16  | 0.695 | 1.17  | 0.935 | -1.26 | 0.030 |
| 1428311_at   | coiled-coil domain containing 6                                             | Ccdc6             | 1.02  | 0.898 | -1.24 | 0.058 | -1.19 | 0.028 | -1.25 | 0.050 | -1.26 | 0.007 |
| 1456042_s_at | Crm, cramped-like (Drosophila)                                              | Cramp11           | 1.02  | 0.749 | 1.19  | 0.232 | 1     | 0.726 | -1.12 | 0.165 | -1.26 | 0.017 |
| 1460458_at   | cysteine-rich secretory protein LCCL domain containing 2                    | Crispld2          | 1.05  | 0.735 | -1.21 | 0.109 | 1.11  | 0.130 | -1.07 | 0.238 | -1.26 | 0.041 |
| 1460208_at   | fibrillin 1                                                                 | Fbn1              | 1.14  | 0.560 | -1.14 | 0.286 | -1.16 | 0.028 | -1.07 | 0.038 | -1.26 | 0.002 |
| 1439786_at   | growth factor receptor bound protein 2-associated protein 2                 | Gab2              | -1.18 | 0.314 | -1.62 | 0.115 | -1.25 | 0.226 | -1.21 | 0.223 | -1.26 | 0.047 |
| 1445480_at   | G protein-coupled receptor 19                                               | Gpr19             | 1.14  | 0.534 | 1.13  | 0.854 | -1.19 | 0.312 | 1.13  | 0.451 | -1.26 | 0.039 |

|              |                                                                             |                   |       |       |       |       |       |       |       |       |       |       |
|--------------|-----------------------------------------------------------------------------|-------------------|-------|-------|-------|-------|-------|-------|-------|-------|-------|-------|
| 1435023_at   | intersectin 2                                                               | Itsn2             | -1.11 | 0.470 | -1.29 | 0.222 | -1.11 | 0.322 | -1.08 | 0.237 | -1.26 | 0.044 |
| 1450052_at   | kinesin family member 2A                                                    | Kif2a             | 1.27  | 0.190 | 1.14  | 0.489 | -1.06 | 0.087 | -1.18 | 0.016 | -1.26 | 0.018 |
| 1455434_a_at | kinectin 1                                                                  | Ktn1              | -1.01 | 0.770 | -1.26 | 0.051 | -1.12 | 0.107 | -1.13 | 0.105 | -1.26 | 0.029 |
| 1450253_a_at | mitogen activated protein kinase kinase kinase 4                            | Map3k4            | 5     | 0.453 | 5.04  | 0.849 | -1.25 | 0.037 | -1.11 | 0.389 | -1.26 | 0.018 |
| 1428900_s_at | methyltransferase 5 domain containing 1                                     | Mett5d1           | -1.36 | 0.125 | -2.65 | 0.017 | -1.2  | 0.142 | -1.25 | 0.087 | -1.26 | 0.049 |
| 1436908_at   | pericentriolar material 1                                                   | Pcm1              | 1.04  | 0.533 | 1.09  | 0.860 | -1.24 | 0.044 | -1.13 | 0.301 | -1.26 | 0.001 |
| 1434786_at   | protein phosphatase 1, regulatory (inhibitor) subunit 12B                   | Ppp1r12b          | -1    | 0.878 | -1.16 | 0.006 | 1.02  | 0.994 | -1.18 | 0.044 | -1.26 | 0.026 |
| 1451179_a_at | quaking                                                                     | Qk                | -1.04 | 0.550 | -1.36 | 0.003 | -1.2  | 0.001 | -1.27 | 0.004 | -1.26 | 0.001 |
| 1458182_at   | RNA binding motif protein 18                                                | Rbm18             | -1.18 | 0.267 | -1.5  | 0.037 | 1.15  | 0.342 | -1.05 | 0.518 | -1.26 | 0.037 |
| 1460337_at   | SH3-domain kinase binding protein 1                                         | Sh3kbp1           | 1.04  | 0.176 | -1.22 | 0.001 | -1.19 | 0.008 | -1.18 | 0.067 | -1.26 | 0.018 |
| 1417329_at   | solute carrier family 23 (nucleobase transporters), member 2                | Slc23a2           | 1.09  | 0.390 | -1.01 | 0.720 | -1.07 | 0.300 | -1.04 | 0.168 | -1.26 | 0.022 |
| 1428396_at   | SMAD specific E3 ubiquitin protein ligase 1 /// similar to Smad ubiquitin   | Smurf1 /// LOC640 | 2.4   | 0.944 | 2.7   | 0.838 | -1.27 | 0.048 | 1.08  | 0.289 | -1.26 | 0.010 |
| 1416525_at   | speckle-type POZ protein                                                    | Spop              | 3.11  | 0.528 | 2.55  | 0.855 | -1.23 | 0.021 | -1.08 | 0.179 | -1.26 | 0.038 |
| 1423658_at   | signal peptide peptidase 3                                                  | Sppl3             | -1.12 | 0.361 | -1.29 | 0.084 | -1.25 | 0.048 | -1.41 | 0.050 | -1.26 | 0.047 |
| 1418546_a_at | Stam binding protein like 1                                                 | Stambpl1          | 1.23  | 0.597 | 1.22  | 0.684 | -1.1  | 0.232 | -1.08 | 0.099 | -1.26 | 0.009 |
| 1445186_at   | stanniocalcin 2                                                             | Stc2              | -1.13 | 0.261 | -1.24 | 0.266 | -1.11 | 0.378 | 1.17  | 0.549 | -1.26 | 0.038 |
| 1429428_at   | transcription factor 7-like 2, T-cell specific, HMG-box                     | Tcf7l2            | -1.03 | 0.449 | -1.67 | 0.017 | 1.01  | 0.619 | -1.33 | 0.005 | -1.26 | 0.029 |
| 1417455_at   | transforming growth factor, beta 3                                          | Tgfb3             | 1.37  | 0.786 | 1.01  | 0.373 | -1.19 | 0.010 | -1.09 | 0.007 | -1.26 | 0.015 |
| 1426949_s_at | translocated promoter region                                                | Tpr               | 1.07  | 0.128 | -1.01 | 0.856 | -1.12 | 0.028 | -1.02 | 0.696 | -1.26 | 0.048 |
| 1422604_at   | urate oxidase                                                               | Uox               | 1.65  | 0.187 | 1.4   | 0.786 | 1.12  | 0.903 | 1.16  | 0.866 | -1.26 | 0.001 |
| 1418143_at   | vacuolar protein sorting 45 (yeast)                                         | Vps45             | 1.14  | 0.345 | -1.23 | 0.203 | -1.03 | 0.635 | -1.02 | 0.347 | -1.26 | 0.025 |
| 1428519_at   | RIKEN cDNA 2610528E23 gene                                                  | 2610528E23Rik     | -1.13 | 0.370 | -1.65 | 0.205 | -1.08 | 0.381 | -1.19 | 0.198 | -1.25 | 0.021 |
| 1433993_at   | RIKEN cDNA 4931406P16 gene                                                  | 4931406P16Rik     | 1.02  | 0.788 | 1.05  | 0.658 | -1.05 | 0.410 | -1.18 | 0.085 | -1.25 | 0.000 |
| 1452809_at   | RIKEN cDNA 9030607L17 gene                                                  | 9030607L17Rik     | 1.08  | 0.523 | 1.07  | 0.538 | 1.15  | 0.642 | 1.02  | 0.932 | -1.25 | 0.030 |
| 1438402_at   | RIKEN cDNA 9630050M13 gene                                                  | 9630050M13Rik     | 4.73  | 0.647 | 3.55  | 0.937 | -1.11 | 0.061 | -1.16 | 0.017 | -1.25 | 0.000 |
| 1427251_at   | ATPase, Ca++ transporting, cardiac muscle, slow twitch 2                    | Atp2a2            | 3.1   | 0.596 | 2.53  | 0.874 | -1.1  | 0.109 | -1    | 0.953 | -1.25 | 0.011 |
| 1438695_at   | RIKEN cDNA C230091D08 gene                                                  | C230091D08Rik     | -1.02 | 0.706 | -1.25 | 0.181 | 1.03  | 0.932 | -1.16 | 0.078 | -1.25 | 0.038 |
| 1452867_at   | procollagen, type IV, alpha 3 (Goodpasture antigen) binding protein         | Col4a3bp          | 1.07  | 0.314 | -1.24 | 0.022 | -1.13 | 0.090 | -1.22 | 0.095 | -1.25 | 0.003 |
| 1441103_at   | DNA segment, Chr 12, ERATO Doi 551, expressed                               | D12Ert0551e       | -1.11 | 0.697 | -1.54 | 0.087 | 1.56  | 0.601 | 2.02  | 0.216 | -1.25 | 0.012 |
| 1434297_at   | RIKEN cDNA E130304F04 gene                                                  | E130304F04Rik     | 1.38  | 0.484 | 2.83  | 0.644 | 1.78  | 1.46  | 0.870 | 0.870 | -1.25 | 0.047 |
| 1441003_at   | excision repair cross-complementing rodent repair deficiency, complement    | Ercc4             | 1.15  | 0.792 | -1.7  | 0.147 | -1.07 | 0.503 | 1.47  | 0.032 | -1.25 | 0.045 |
| 1433857_at   | fat tumor suppressor homolog (Drosophila) /// similar to fat tumor suppress | Fath /// LOC67212 | 1.13  | 0.597 | -1.01 | 0.680 | -1.11 | 0.023 | -1.09 | 0.069 | -1.25 | 0.005 |
| 1455057_at   | guanine monophosphate synthetase                                            | Gmps              | 1.03  | 0.885 | -1.09 | 0.072 | -1.17 | 0.168 | -1.36 | 0.025 | -1.25 | 0.008 |
| 1415703_at   | HECT, UBA and WWE domain containing 1                                       | Huwe1             | 1.55  | 0.221 | 1.3   | 0.724 | -1.15 | 0.048 | -1.14 | 0.084 | -1.25 | 0.017 |
| 1421991_a_at | insulin-like growth factor binding protein 4                                | Igfbp4            | 5.56  | 0.525 | 5.9   | 0.645 | -1.1  | 0.534 | 1.1   | 0.255 | -1.25 | 0.024 |
| 1434185_at   | similar to acetyl-coenzyme A carboxylase alpha                              | LOC672245         | -1.15 | 0.293 | -1.61 | 0.062 | -1.13 | 0.007 | -1.31 | 0.029 | -1.25 | 0.021 |
| 1429514_at   | phosphatidic acid phosphatase type 2B                                       | Ppap2b            | 1.01  | 0.882 | -1.45 | 0.010 | -1.14 | 0.085 | -1.27 | 0.023 | -1.25 | 0.037 |
| 1428392_at   | Ras association (RalGDS/AF-6) domain family 2                               | Rassf2            | 1.23  | 0.784 | 2.32  | 0.409 | 1.72  | 0.089 | 1.21  | 0.786 | -1.25 | 0.036 |
| 1455310_at   | RNA binding motif protein 16                                                | Rbm16             | -1.08 | 0.509 | -1.24 | 0.324 | -1.21 | 0.001 | -1.26 | 0.000 | -1.25 | 0.012 |
| 1428555_at   | SET domain containing 2                                                     | Setd2             | 1.09  | 0.680 | 1.3   | 0.328 | 1.06  | 0.480 | -1.02 | 0.714 | -1.25 | 0.038 |
| 1450889_at   | SWI/SNF related, matrix associated, actin dependent regulator of chromatin  | Smarca3           | -1.14 | 0.074 | -1.29 | 0.055 | -1.09 | 0.070 | -1.06 | 0.462 | -1.25 | 0.040 |
| 1448396_at   | transmembrane protein 131                                                   | Tmem131           | -1.06 | 0.182 | -1.16 | 0.104 | -1.11 | 0.472 | -1.24 | 0.044 | -1.25 | 0.000 |
| 1423474_at   | topoisomerase (DNA) I                                                       | Top1              | 1.02  | 0.531 | -1.03 | 0.652 | -1.13 | 0.054 | -1.17 | 0.081 | -1.25 | 0.002 |
| 1448548_at   | tubby like protein 4                                                        | Tulp4             | 1.09  | 0.337 | -1.07 | 0.272 | -1.12 | 0.037 | -1.13 | 0.083 | -1.25 | 0.001 |
| 1455094_s_at | ubiquitin-conjugating enzyme E2G 1 (UBC7 homolog, C. elegans)               | Ube2g1            | 1.02  | 0.835 | -1.12 | 0.169 | -1.06 | 0.283 | -1.21 | 0.029 | -1.25 | 0.043 |
| 1438971_x_at | ubiquitin-conjugating enzyme E2H                                            | Ube2h             | -1.38 | 0.230 | -1.5  | 0.199 | -1.15 | 0.196 | -1.3  | 0.013 | -1.25 | 0.004 |
| 1427235_at   | ubiquitously transcribed tetratricopeptide repeat gene, X chromosome        | Utx               | 1.04  | 0.816 | 1     | 0.881 | -1.15 | 0.026 | -1.12 | 0.118 | -1.25 | 0.018 |
| 1437155_a_at | WW domain containing transcription regulator 1                              | Wwtr1             | -1.05 | 0.470 | -1.46 | 0.005 | -1.38 | 0.007 | -1.35 | 0.023 | -1.25 | 0.001 |
| 1454668_at   | zinc finger, UBR1 type 1                                                    | Zubr1             | 1.12  | 0.533 | 1.1   | 0.706 | -1.09 | 0.302 | -1.16 | 0.014 | -1.25 | 0.027 |
| 1428551_at   | RIKEN cDNA 2410075D05 gene                                                  | 2410075D05Rik     | 1.31  | 0.065 | 1.13  | 0.478 | 1.02  | 0.953 | 1.05  | 0.881 | -1.24 | 0.005 |
| 1428897_at   | RIKEN cDNA 2610029I01 gene                                                  | 2610029I01Rik     | 1.09  | 0.598 | -1.03 | 0.678 | -1.03 | 0.643 | 1.01  | 0.869 | -1.24 | 0.003 |
| 1454841_at   | RIKEN cDNA 4921511H13 gene                                                  | 4921511H13Rik     | -1.26 | 0.188 | -1.13 | 0.210 | -1.07 | 0.163 | 1.02  | 0.869 | -1.24 | 0.027 |
| 1435006_s_at | ATP-binding cassette, sub-family B (MDR/TAP), member 7                      | Abcb7             | -1.02 | 0.624 | -1.77 | 0.006 | -1.02 | 0.669 | -1.15 | 0.306 | -1.24 | 0.019 |
| 1450627_at   | progressive ankylosis                                                       | Ank               | 1.11  | 0.755 | -1.55 | 0.074 | -1.17 | 0.091 | -1.14 | 0.056 | -1.24 | 0.005 |
| 1426534_a_at | ADP-ribosylation factor GTPase activating protein 3                         | Arfgap3           | 1.04  | 0.590 | -1.23 | 0.007 | -1.19 | 0.007 | -1.08 | 0.097 | -1.24 | 0.027 |
| 1421042_at   | rho/rac guanine nucleotide exchange factor (GEF) 2                          | Arhgef2           | 1.23  | 0.776 | 1.07  | 0.787 | -1.19 | 0.060 | 1.01  | 0.998 | -1.24 | 0.031 |
| 1448135_at   | activating transcription factor 4                                           | Atf4              | 1.06  | 0.784 | -1.26 | 0.128 | -1.07 | 0.309 | -1.08 | 0.009 | -1.24 | 0.002 |
| 1455206_at   | Hypothetical protein C130006E23                                             | C130006E23        | -1.01 | 0.641 | -1.65 | 0.154 | -1.08 | 0.124 | -1.1  | 0.347 | -1.24 | 0.048 |

|              |                                                                                            |               |       |       |       |       |       |       |       |       |       |       |
|--------------|--------------------------------------------------------------------------------------------|---------------|-------|-------|-------|-------|-------|-------|-------|-------|-------|-------|
| 1434479_at   | Procollagen, type V, alpha 1                                                               | Col5a1        | -1.04 | 0.371 | -1.27 | 0.057 | -1.18 | 0.021 | -1.11 | 0.094 | -1.24 | 0.008 |
| 1455627_at   | procollagen, type VIII, alpha 1                                                            | Col8a1        | -1.1  | 0.228 | -1.5  | 0.018 | -1.2  | 0.084 | -1.17 | 0.032 | -1.24 | 0.036 |
| 1438133_a_at | cysteine rich protein 61                                                                   | Cyr61         | 1.71  | 0.674 | 1.51  | 0.919 | -1.14 | 0.132 | -1.14 | 0.019 | -1.24 | 0.014 |
| 1440985_at   | RIKEN cDNA D130023J23 gene                                                                 | D130023J23Rik | 1.45  | 0.357 | 2.79  | 0.600 | 1     | 0.518 | -1.37 | 0.205 | -1.24 | 0.010 |
| 1451469_at   | RIKEN cDNA D530005L17 gene                                                                 | D530005L17Rik | 1.12  | 0.688 | -1.16 | 0.357 | -1.17 | 0.221 | 1.1   | 0.189 | -1.24 | 0.009 |
| 1448892_at   | dedicator of cytokinesis 7                                                                 | Dock7         | -1.05 | 0.118 | -1.44 | 0.001 | -1.08 | 0.068 | -1.21 | 0.065 | -1.24 | 0.002 |
| 1436550_at   | F-box protein 30                                                                           | Fbxo30        | -1.17 | 0.333 | 1     | 0.962 | 1.05  | 0.582 | 1.08  | 0.587 | -1.24 | 0.045 |
| 1426908_at   | UDP-N-acetyl-alpha-D-galactosamine: polypeptide N-acetylgalactosaminyl                     | Galnt7        | 1.16  | 0.625 | -1.46 | 0.065 | -1.14 | 0.260 | -1.01 | 0.770 | -1.24 | 0.024 |
| 1446737_a_at | hook homolog 3 (Drosophila)                                                                | Hook3         | -1.06 | 0.430 | 1.05  | 0.861 | -1.1  | 0.324 | -1.11 | 0.040 | -1.24 | 0.024 |
| 1450692_at   | kinesin family member 4                                                                    | Kif4          | 1.03  | 0.388 | -1.19 | 0.131 | -1.31 | 0.009 | -1.19 | 0.075 | -1.24 | 0.041 |
| 1416904_at   | muscleblind-like 1 (Drosophila)                                                            | Mbni1         | 1.12  | 0.155 | -1.19 | 0.135 | -1.17 | 0.019 | -1.18 | 0.001 | -1.24 | 0.005 |
| 1417675_a_at | midasin homolog (yeast)                                                                    | Mdn1          | 1.02  | 0.797 | -1.04 | 0.727 | -1.12 | 0.304 | -1.13 | 0.141 | -1.24 | 0.040 |
| 1432012_a_at | NOL1/NOP2/Sun domain family 6                                                              | Nsun6         | 3.27  | 0.017 | 3.56  | 0.020 | 1.36  | 0.583 | 1.35  | 0.022 | -1.24 | 0.038 |
| 1449214_a_at | optic atrophy 1 homolog (human)                                                            | Opa1          | 1.51  | 0.444 | 1.37  | 0.579 | -1.15 | 0.023 | -1.17 | 0.130 | -1.24 | 0.005 |
| 1446272_at   | PCTAIRE-motif protein kinase 2                                                             | Pctk2         | -1.11 | 0.454 | -1.14 | 0.499 | -1.25 | 0.353 | 1.11  | 0.442 | -1.24 | 0.049 |
| 1448558_a_at | phospholipase A2, group IVA (cytosolic, calcium-dependent)                                 | Pla2g4a       | 1.12  | 0.093 | -1.19 | 0.113 | -1.12 | 0.071 | -1.1  | 0.147 | -1.24 | 0.020 |
| 1418446_at   | solute carrier family 16 (monocarboxylic acid transporters), member 2                      | Slc16a2       | 3.66  | 0.085 | 2.37  | 0.450 | 1.11  | 0.556 | 1.19  | 0.983 | -1.24 | 0.033 |
| 1435304_at   | superoxide dismutase 1, soluble                                                            | Sod1          | -1.09 | 0.507 | -1.22 | 0.285 | -1.06 | 0.260 | -1.09 | 0.030 | -1.24 | 0.001 |
| 1460243_at   | serine palmitoyltransferase, long chain base subunit 2                                     | Sptlc2        | 1.01  | 0.892 | -1.27 | 0.013 | -1.18 | 0.169 | -1.11 | 0.048 | -1.24 | 0.022 |
| 1428372_at   | suppression of tumorigenicity 5                                                            | St5           | 1.1   | 0.176 | -1.05 | 0.443 | -1.13 | 0.227 | -1.19 | 0.101 | -1.24 | 0.028 |
| 1427441_a_at | succinate-Coenzyme A ligase, GDP-forming, beta subunit                                     | Succlg2       | 3.51  | 0.466 | 1.95  | 0.784 | -1.16 | 0.167 | 1.02  | 0.896 | -1.24 | 0.036 |
| 1421870_at   | tripartite motif-containing 44                                                             | Trim44        | 1.11  | 0.302 | -1.15 | 0.188 | -1.07 | 0.174 | -1.19 | 0.017 | -1.24 | 0.044 |
| 1435133_at   | UDP-glucose ceramide glucosyltransferase                                                   | Ugcg          | 1.12  | 0.406 | -1.32 | 0.019 | -1.19 | 0.087 | -1.16 | 0.084 | -1.24 | 0.006 |
| 1460620_at   | zinc finger protein 592                                                                    | Zfp592        | -1.03 | 0.392 | 1.26  | 0.459 | 1.1   | 0.302 | -1.05 | 0.388 | -1.24 | 0.033 |
| 1429623_at   | zinc finger protein 644                                                                    | Zfp644        | 1.52  | 0.283 | 1.6   | 0.361 | -1.13 | 0.084 | -1.11 | 0.132 | -1.24 | 0.038 |
| 1430543_at   | RIKEN cDNA 1500005P14 gene                                                                 | 1500005P14Rik | 1.35  | 0.267 | 1.26  | 0.279 | -1.05 | 0.434 | -1.06 | 0.024 | -1.23 | 0.016 |
| 1434613_at   | RIKEN cDNA 1810013L24 gene                                                                 | 1810013L24Rik | -1.14 | 0.432 | -1.46 | 0.151 | -1    | 0.842 | -1.13 | 0.304 | -1.23 | 0.030 |
| 1430028_at   | RIKEN cDNA 2210018M11 gene                                                                 | 2210018M11Rik | 1.18  | 0.201 | 1.31  | 0.098 | -1.09 | 0.306 | -1    | 0.877 | -1.23 | 0.041 |
| 1443980_at   | agrln                                                                                      | Agrln         | -1.08 | 0.478 | 1.09  | 0.376 | 1.41  | 0.937 | -1.05 | 0.505 | -1.23 | 0.008 |
| 1427245_at   | ADP-ribosylation factor GTPase activating protein 1                                        | Arfgap1       | -1.2  | 0.299 | -1.2  | 0.267 | -1.17 | 0.036 | -1.15 | 0.003 | -1.23 | 0.031 |
| 1457575_at   | expressed sequence AU021128                                                                | AU021128      | 1.15  | 0.735 | -1.28 | 0.455 | 1.76  | 0.454 | 2.27  | 0.654 | -1.23 | 0.037 |
| 1457568_at   | hypothetical protein C230004L04                                                            | C230004L04    | 1.03  | 0.819 | -1.22 | 0.300 | 1.3   | 0.397 | -1.01 | 0.722 | -1.23 | 0.019 |
| 1434645_at   | RIKEN cDNA C530008M17 gene                                                                 | C530008M17Rik | 1.29  | 0.356 | -1.85 | 0.032 | -1.15 | 0.144 | -1.47 | 0.007 | -1.23 | 0.011 |
| 1440617_at   | carboxypeptidase A6                                                                        | Cpa6          | -1.06 | 0.677 | -1.19 | 0.122 | 1.03  | 0.919 | 1.05  | 0.785 | -1.23 | 0.005 |
| 1452155_a_at | DEAD (Asp-Glu-Ala-Asp) box polypeptide 17                                                  | Ddx17         | 1.06  | 0.682 | -1.06 | 0.523 | -1.12 | 0.113 | -1.06 | 0.007 | -1.23 | 0.032 |
| 1426590_at   | G elongation factor, mitochondrial 2                                                       | Gfm2          | 1.56  | 0.330 | 1.47  | 0.304 | 1.08  | 0.639 | 1.04  | 0.726 | -1.23 | 0.021 |
| 1459622_at   | gene model 22, (NCBI)                                                                      | Gm22          | -1.04 | 0.244 | -1.25 | 0.048 | -1.06 | 0.346 | -1.14 | 0.005 | -1.23 | 0.014 |
| 1439030_at   | GDP-mannose pyrophosphorylase B                                                            | Gmppb         | -1.11 | 0.270 | -1.51 | 0.019 | -1.08 | 0.020 | -1.11 | 0.116 | -1.23 | 0.004 |
| 1417810_a_at | potassium voltage gated channel, Shab-related subfamily, member 1 /// pr Kcnb1 /// Pacsin2 | Kcnb1         | -1.09 | 0.292 | -1.3  | 0.057 | -1.12 | 0.056 | -1.19 | 0.012 | -1.23 | 0.007 |
| 1435772_at   | kinesin family member 21B                                                                  | Kif21b        | -1.15 | 0.296 | -1.57 | 0.164 | -1.27 | 0.103 | -1.01 | 0.630 | -1.23 | 0.048 |
| 1422771_at   | similar to Mothers against decapentaplegic homolog 6 (SMAD 6) (Mothers                     | LOC670044     | 1.5   | 0.608 | 1.22  | 0.633 | -1.14 | 0.113 | -1.12 | 0.254 | -1.23 | 0.043 |
| 1423251_at   | LUC7-like 2 (S. cerevisiae)                                                                | Luc7l2        | -1.02 | 0.542 | -1.11 | 0.149 | -1.07 | 0.277 | -1.22 | 0.005 | -1.23 | 0.036 |
| 1454740_at   | mindbomb homolog 1 (Drosophila)                                                            | Mib1          | -1.13 | 0.432 | -1.41 | 0.125 | -1.06 | 0.323 | -1.21 | 0.077 | -1.23 | 0.007 |
| 1434110_x_at | major urinary protein 1                                                                    | Mup1          | 1.17  | 0.145 | 1.36  | 0.065 | -1.32 | 0.325 | 1.38  | 0.174 | -1.23 | 0.035 |
| 1423374_at   | nuclear receptor coactivator 6                                                             | Ncoa6         | 1.03  | 0.828 | 1.05  | 0.768 | 1.01  | 0.446 | -1.15 | 0.026 | -1.23 | 0.032 |
| 1415830_at   | origin recognition complex, subunit 5-like (S. cerevisiae)                                 | Orc5l         | 1.08  | 0.491 | 1.22  | 0.165 | 1.02  | 0.970 | -1.13 | 0.091 | -1.23 | 0.010 |
| 1451669_at   | protein phosphatase 1B, magnesium dependent, beta isoform                                  | Ppm1b         | -1.15 | 0.247 | -1.34 | 0.097 | -1.12 | 0.136 | -1.16 | 0.096 | -1.23 | 0.009 |
| 1438012_at   | protein phosphatase 1 (formerly 2C)-like                                                   | Ppm1l         | 1.05  | 0.891 | -1.37 | 0.119 | -1.21 | 0.028 | -1.22 | 0.058 | -1.23 | 0.010 |
| 1418039_at   | RAB, member of RAS oncogene family-like 3                                                  | Rabl3         | -1.13 | 0.061 | -1.22 | 0.009 | -1.12 | 0.060 | -1.17 | 0.019 | -1.23 | 0.014 |
| 1449292_at   | RB1-inducible coiled-coil 1                                                                | Rb1cc1        | -1.16 | 0.389 | -1.19 | 0.272 | -1.43 | 0.032 | -1.23 | 0.160 | -1.23 | 0.024 |
| 1450173_at   | receptor (TNFRSF)-interacting serine-threonine kinase 2                                    | Ripk2         | 1.62  | 0.397 | 1.29  | 0.824 | -1.11 | 0.267 | -1.18 | 0.020 | -1.23 | 0.002 |
| 1433608_at   | sec1 family domain containing 2                                                            | Scfd2         | -1.14 | 0.062 | -1.87 | 0.029 | -1.11 | 0.304 | -1.21 | 0.093 | -1.23 | 0.021 |
| 1455149_at   | SH3 domain containing ring finger 1                                                        | Sh3r1         | -1.13 | 0.423 | -1.29 | 0.143 | -1.1  | 0.364 | -1.39 | 0.015 | -1.23 | 0.043 |
| 1448568_a_at | solute carrier family 20, member 1                                                         | Slc20a1       | -1.02 | 0.679 | -1.26 | 0.001 | -1.1  | 0.033 | -1.11 | 0.000 | -1.23 | 0.005 |
| 1422133_at   | sialophorin                                                                                | Spn           | 1.51  | 0.280 | 2.29  | 0.692 | 1.22  | 0.712 | 1.04  | 0.863 | -1.23 | 0.045 |
| 1424053_a_at | transcription factor 25 (basic helix-loop-helix)                                           | Tcf25         | 1.4   | 0.864 | 1.44  | 0.888 | -1.12 | 0.114 | 1.08  | 0.418 | -1.23 | 0.009 |
| 1453160_at   | thyroid hormone receptor associated protein 1                                              | Thrap1        | 1.13  | 0.030 | 1.18  | 0.404 | 1.02  | 0.880 | -1.05 | 0.451 | -1.23 | 0.028 |
| 1454643_at   | ubiquitin associated protein 2-like                                                        | Ubap2l        | -1.17 | 0.331 | -1.25 | 0.227 | -1.08 | 0.262 | -1.21 | 0.041 | -1.23 | 0.041 |

|              |                                                                             |                    |       |       |       |       |       |       |       |       |       |       |
|--------------|-----------------------------------------------------------------------------|--------------------|-------|-------|-------|-------|-------|-------|-------|-------|-------|-------|
| 1417846_at   | Unc-51 like kinase 2 (C. elegans)                                           | Ulk2               | 1.06  | 0.955 | -1.03 | 0.606 | -1.07 | 0.313 | -1.06 | 0.490 | -1.23 | 0.003 |
| 1453269_at   | unc-5 homolog B (C. elegans)                                                | Unc5b              | -1.24 | 0.135 | -1.65 | 0.038 | -1.28 | 0.156 | -1.17 | 0.065 | -1.23 | 0.032 |
| 1422032_a_at | zinc finger, AN1-type domain 6                                              | Zfand6             | 1     | 0.981 | -1.26 | 0.011 | -1.04 | 0.413 | -1.08 | 0.085 | -1.23 | 0.008 |
| 1455294_at   | RIKEN cDNA 1110029L17 gene                                                  | 1110029L17Rik      | 1.19  | 0.741 | -1.05 | 0.443 | -1.1  | 0.236 | -1.12 | 0.061 | -1.22 | 0.034 |
| 1427906_at   | RIKEN cDNA 1110037F02 gene                                                  | 1110037F02Rik      | 1.15  | 0.331 | 1.12  | 0.404 | -1.07 | 0.342 | -1.07 | 0.275 | -1.22 | 0.017 |
| 1453122_at   | RIKEN cDNA 4921533L14 gene                                                  | 4921533L14Rik      | 1.19  | 0.442 | -1.08 | 0.591 | -1.09 | 0.243 | -1.09 | 0.171 | -1.22 | 0.011 |
| 1429669_at   | RIKEN cDNA 4930488L21 gene                                                  | 4930488L21Rik      | 1.07  | 0.769 | 2.34  | 0.096 | 1.86  | 0.289 | 1.35  | 0.687 | -1.22 | 0.029 |
| 1454801_at   | ankyrin repeat domain 28                                                    | Ankrd28            | 1.05  | 0.595 | -1.21 | 0.198 | -1.27 | 0.205 | -1.26 | 0.087 | -1.22 | 0.045 |
| 1454990_at   | AT rich interactive domain 2 (Arid-rfx like)                                | Arid2              | -1.03 | 0.543 | 1     | 0.995 | 1.06  | 0.728 | -1.13 | 0.195 | -1.22 | 0.028 |
| 1435953_at   | BTAf1 RNA polymerase II, B-TFIID transcription factor-associated, (Mot1)    | Btaf1              | 1.27  | 0.155 | 1.22  | 0.348 | -1.08 | 0.202 | -1.08 | 0.246 | -1.22 | 0.034 |
| 1434301_at   | RIKEN cDNA D330050I23 gene                                                  | D330050I23Rik      | -1.05 | 0.641 | -1.19 | 0.124 | -1.02 | 0.675 | -1.09 | 0.267 | -1.22 | 0.042 |
| 1454995_at   | dimethylarginine dimethylaminohydrolase 1                                   | Ddah1              | 1.01  | 0.966 | -1.19 | 0.093 | -1.07 | 0.369 | -1.11 | 0.245 | -1.22 | 0.008 |
| 1434564_at   | E2F transcription factor 3                                                  | E2f3               | -1.05 | 0.489 | 1.07  | 0.544 | -1.14 | 0.075 | -1.23 | 0.085 | -1.22 | 0.039 |
| 1417238_at   | Ewing sarcoma breakpoint region 1                                           | Ewsr1              | 1.69  | 0.501 | 1.43  | 0.802 | -1.08 | 0.439 | 1.04  | 0.330 | -1.22 | 0.023 |
| 1419159_at   | golgi autoantigen, golgin subfamily a, 3                                    | Golga3             | -1.01 | 0.693 | -1.16 | 0.118 | -1.13 | 0.087 | -1.02 | 0.661 | -1.22 | 0.025 |
| 1417293_at   | heparan sulfate 6-O-sulfotransferase 1                                      | Hs6st1             | 1.3   | 0.555 | 1.35  | 0.568 | -1.07 | 0.415 | -1.07 | 0.066 | -1.22 | 0.014 |
| 1450047_at   | heparan sulfate 6-O-sulfotransferase 2                                      | Hs6st2             | 1.01  | 0.944 | -1.18 | 0.082 | -1.19 | 0.032 | -1.16 | 0.058 | -1.22 | 0.024 |
| 1444158_at   | jumonji, AT rich interactive domain 1C (Rbp2 like)                          | Jarid1c            | -1.09 | 0.306 | -1.08 | 0.468 | -1.03 | 0.445 | -1.07 | 0.325 | -1.22 | 0.019 |
| 1455398_at   | leucine rich repeat containing 8 family, member C                           | Lrrc8c             | -1.14 | 0.225 | -1.55 | 0.040 | -1.04 | 0.452 | -1.19 | 0.016 | -1.22 | 0.026 |
| 1448647_at   | mannosidase 2, alpha 1                                                      | Man2a1             | 1.01  | 0.847 | -1.3  | 0.008 | -1.13 | 0.055 | -1.09 | 0.114 | -1.22 | 0.000 |
| 1434746_at   | MAX gene associated                                                         | Mga                | -1.01 | 0.752 | 1.03  | 0.896 | -1.02 | 0.774 | 1.08  | 0.844 | -1.22 | 0.023 |
| 1428817_at   | MON2 homolog (yeast)                                                        | Mon2               | 1.05  | 0.106 | -1.12 | 0.075 | -1.1  | 0.160 | -1.19 | 0.013 | -1.22 | 0.006 |
| 1419754_at   | myosin Va                                                                   | Myo5a              | 1.2   | 0.310 | -1.15 | 0.225 | -1.12 | 0.003 | -1.07 | 0.350 | -1.22 | 0.018 |
| 1433942_at   | myosin VI                                                                   | Myo6               | 1.51  | 0.511 | 1.3   | 0.948 | -1.09 | 0.467 | 1.03  | 0.630 | -1.22 | 0.011 |
| 1422567_at   | niban protein                                                               | Niban              | 1.18  | 0.643 | -1.11 | 0.344 | -1.2  | 0.023 | -1.09 | 0.098 | -1.22 | 0.046 |
| 1451379_at   | RAB22A, member RAS oncogene family                                          | Rab22a             | -1.1  | 0.001 | -1.08 | 0.024 | -1.07 | 0.088 | -1.12 | 0.036 | -1.22 | 0.001 |
| 1454915_at   | RAB3 GTPase activating protein subunit 2                                    | Rab3gap2           | 1.09  | 0.494 | -1.24 | 0.100 | -1.21 | 0.020 | -1.12 | 0.132 | -1.22 | 0.015 |
| 1426799_at   | RAB8B, member RAS oncogene family                                           | Rab8b              | -1.05 | 0.308 | -1.21 | 0.049 | -1.08 | 0.322 | -1.07 | 0.415 | -1.22 | 0.010 |
| 1422736_at   | RAN binding protein 9                                                       | Ranbp9             | 3.75  | 0.269 | 2.84  | 0.294 | -1.08 | 0.324 | -1.02 | 0.627 | -1.22 | 0.041 |
| 1451365_at   | RNA binding motif protein 19                                                | Rbm19              | -1.05 | 0.250 | -1.1  | 0.219 | -1.11 | 0.046 | -1.09 | 0.097 | -1.22 | 0.026 |
| 1417542_at   | ribosomal protein S6 kinase, polypeptide 2                                  | Rps6ka2            | -1.22 | 0.011 | -1.66 | 0.014 | -1.05 | 0.435 | -1.09 | 0.009 | -1.22 | 0.048 |
| 1424659_at   | slit homolog 2 (Drosophila)                                                 | Slit2              | -1.27 | 0.100 | -1.7  | 0.044 | -1.22 | 0.043 | -1.2  | 0.015 | -1.22 | 0.025 |
| 1430133_at   | TBC1 domain family, member 8B                                               | Tbc1d8b            | 1.06  | 0.927 | -1.4  | 0.195 | -1.1  | 0.205 | -1.13 | 0.194 | -1.22 | 0.005 |
| 1455128_x_at | trinucleotide repeat containing 6a                                          | Tnrc6a             | 1.21  | 0.256 | 1.27  | 0.305 | -1.03 | 0.592 | -1.08 | 0.287 | -1.22 | 0.002 |
| 1448925_at   | twist homolog 2 (Drosophila)                                                | Twist2             | -1.06 | 0.022 | -1.28 | 0.038 | -1.14 | 0.162 | -1.11 | 0.134 | -1.22 | 0.015 |
| 1427105_at   | RIKEN cDNA 2610510J17 gene                                                  | 2610510J17Rik      | 1.53  | 0.078 | 1.28  | 0.949 | 1.11  | 0.824 | 1.07  | 0.898 | -1.21 | 0.035 |
| 1428300_at   | RIKEN cDNA 4932439K10 gene                                                  | 4932439K10Rik      | 1.03  | 0.583 | -1    | 0.966 | -1.16 | 0.132 | -1.1  | 0.153 | -1.21 | 0.008 |
| 1460342_s_at | expressed sequence AA536749                                                 | AA536749           | 1.43  | 0.569 | 1.27  | 0.986 | -1.14 | 0.015 | -1.11 | 0.008 | -1.21 | 0.028 |
| 1454982_at   | ADP-ribosylation factor guanine nucleotide-exchange factor 2 (brefeldin A-) | Arfgef2 /// LOC670 | -1.03 | 0.504 | -1.26 | 0.063 | -1.08 | 0.046 | -1.11 | 0.061 | -1.21 | 0.017 |
| 1426330_at   | calcium channel, voltage-dependent, gamma subunit 5                         | Cacng5             | 1.15  | 0.668 | 2.21  | 0.338 | -1.03 | 0.436 | -1.09 | 0.359 | -1.21 | 0.017 |
| 1449858_at   | CD86 antigen                                                                | Cd86               | 1.6   | 0.214 | 1.08  | 0.979 | 1.28  | 0.159 | -1.13 | 0.449 | -1.21 | 0.014 |
| 1450625_at   | procollagen, type V, alpha 2                                                | Col5a2             | -1    | 0.861 | -1.28 | 0.009 | -1.17 | 0.003 | -1.18 | 0.026 | -1.21 | 0.013 |
| 1420617_at   | cytoplasmic polyadenylation element binding protein 4                       | Cpeb4              | 1.29  | 0.254 | 1.07  | 0.978 | -1.01 | 0.933 | -1.06 | 0.242 | -1.21 | 0.026 |
| 1448149_at   | catenin (cadherin associated protein), alpha 1                              | Ctnna1             | -1.06 | 0.189 | -1.22 | 0.016 | -1.03 | 0.453 | -1.06 | 0.186 | -1.21 | 0.004 |
| 1435542_s_at | CTTNBP2 N-terminal like                                                     | Cttnbp2nl          | -1.09 | 0.286 | 1.02  | 0.655 | -1.1  | 0.111 | -1.1  | 0.184 | -1.21 | 0.012 |
| 1437550_at   | DEAH (Asp-Glu-Ala-His) box polypeptide 36                                   | Dhx36              | 1.02  | 0.985 | 1.08  | 0.699 | 1.06  | 0.546 | 1.08  | 0.647 | -1.21 | 0.049 |
| 1428374_at   | glucuronyl C5-epimerase                                                     | Glce               | -1    | 0.800 | -1.34 | 0.010 | -1.07 | 0.316 | -1.05 | 0.512 | -1.21 | 0.045 |
| 1428096_at   | importin 11                                                                 | Ipo11              | 1.37  | 0.185 | -1.01 | 0.697 | -1.02 | 0.617 | -1.08 | 0.241 | -1.21 | 0.043 |
| 1423268_at   | integrin alpha 5 (fibronectin receptor alpha)                               | Itga5              | 32.88 | 0.967 | 24.24 | 0.357 | -1.32 | 0.066 | -1.12 | 0.226 | -1.21 | 0.043 |
| 1419362_at   | mitochondrial ribosomal protein L35                                         | Mrp135             | 3.08  | 0.670 | 2.11  | 0.302 | -1.05 | 0.643 | 1.39  | 0.262 | -1.21 | 0.039 |
| 1417624_at   | Ngfi-A binding protein 1                                                    | Nab1               | 1.01  | 0.959 | -1.21 | 0.037 | 1.06  | 0.406 | 1.02  | 0.894 | -1.21 | 0.041 |
| 1421080_at   | nuclear receptor subfamily 4, group A, member 3                             | Nr4a3              | 1.79  | 0.193 | 1.29  | 0.271 | -1.22 | 0.208 | 1.25  | 0.486 | -1.21 | 0.017 |
| 1438672_at   | parvin, beta                                                                | Parvb              | 1.13  | 0.651 | -1.01 | 0.956 | -1.04 | 0.623 | -1.16 | 0.049 | -1.21 | 0.049 |
| 1455359_at   | protein tyrosine phosphatase, non-receptor type 14                          | Ptpn14             | -1.07 | 0.367 | -1.2  | 0.086 | 1.04  | 0.148 | -1.22 | 0.020 | -1.21 | 0.004 |
| 1451037_at   | protein tyrosine phosphatase, non-receptor type 9                           | Ptpn9              | 1.23  | 0.490 | 1.16  | 0.861 | -1.12 | 0.004 | -1.15 | 0.012 | -1.21 | 0.002 |
| 1419945_s_at | RAB2, member RAS oncogene family                                            | Rab2               | -1.03 | 0.303 | -1.25 | 0.007 | -1.13 | 0.068 | -1.09 | 0.018 | -1.21 | 0.049 |
| 1423990_at   | RAB28, member RAS oncogene family                                           | Rab28              | -1.02 | 0.506 | -1.41 | 0.005 | -1.1  | 0.045 | -1.16 | 0.106 | -1.21 | 0.003 |
| 1427448_at   | rabaptin, RAB GTPase binding effector protein 1                             | Rabep1             | -1.17 | 0.293 | 1.02  | 0.895 | -1.17 | 0.161 | -1.04 | 0.578 | -1.21 | 0.047 |

|              |                                                                                                           |               |       |       |       |       |       |       |       |       |       |       |
|--------------|-----------------------------------------------------------------------------------------------------------|---------------|-------|-------|-------|-------|-------|-------|-------|-------|-------|-------|
| 1425266_a_at | RAP1, GTP-GDP dissociation stimulator 1                                                                   | Rap1gds1      | 1.21  | 0.584 | -1.07 | 0.398 | -1.11 | 0.057 | -1.22 | 0.032 | -1.21 | 0.002 |
| 1455024_at   | tousled-like kinase 1                                                                                     | Tlk1          | 1.18  | 0.269 | 1.03  | 0.989 | -1.13 | 0.003 | -1.2  | 0.006 | -1.21 | 0.045 |
| 1416731_at   | topoisomerase (DNA) II beta                                                                               | Top2b         | 1.11  | 0.299 | -1.14 | 0.276 | -1.08 | 0.285 | -1.07 | 0.352 | -1.21 | 0.045 |
| 1448551_a_at | tripartite motif protein 2                                                                                | Trim2         | 1.04  | 0.902 | -1.53 | 0.014 | 1.03  | 0.934 | -1.05 | 0.552 | -1.21 | 0.043 |
| 1424274_at   | vesicle docking protein                                                                                   | Vdp           | 1.22  | 0.427 | -1.05 | 0.491 | -1.13 | 0.003 | -1.08 | 0.114 | -1.21 | 0.004 |
| 1445514_at   | von Hippel-Lindau syndrome homolog                                                                        | Vlh           | -1.07 | 0.484 | 1.06  | 0.885 | -1.07 | 0.618 | 1.2   | 0.590 | -1.21 | 0.024 |
| 1453343_s_at | vaccinia related kinase 2                                                                                 | Vrk2          | -1    | 0.945 | -1.32 | 0.031 | -1.19 | 0.104 | -1.3  | 0.007 | -1.21 | 0.048 |
| 1449515_at   | zinc finger protein 292                                                                                   | Zfp292        | -1.07 | 0.526 | 1     | 0.943 | -1.11 | 0.341 | 1.04  | 0.502 | -1.21 | 0.027 |
| 1435608_at   | zinc and ring finger 3 /// similar to Goliath homolog precursor (Ring finger protein 3) Znf3 /// LOC6318f | Znf3          | -1.05 | 0.634 | -1.27 | 0.008 | -1.05 | 0.584 | -1.3  | 0.001 | -1.21 | 0.040 |
| 1429898_at   | RIKEN cDNA 2310008M10 gene                                                                                | 2310008M10Rik | -1.24 | 0.249 | -1.5  | 0.144 | -1.21 | 0.125 | 1.14  | 0.246 | -1.2  | 0.049 |
| 1441155_at   | RIKEN cDNA 2810446P07 gene                                                                                | 2810446P07Rik | 1.13  | 0.985 | -1.1  | 0.342 | -1.03 | 0.457 | -1.01 | 0.691 | -1.2  | 0.031 |
| 1434126_at   | RIKEN cDNA 4930402H24 gene                                                                                | 4930402H24Rik | 1.08  | 0.782 | -1.12 | 0.290 | -1.27 | 0.114 | -1.19 | 0.081 | -1.2  | 0.020 |
| 1454195_at   | RIKEN cDNA 4933433G19 gene                                                                                | 4933433G19Rik | -1.29 | 0.298 | -1.02 | 0.386 | 1.03  | 0.624 | 1.13  | 0.549 | -1.2  | 0.040 |
| 1453186_at   | RIKEN cDNA 5730406M06 gene                                                                                | 5730406M06Rik | 2.06  | 0.444 | 1.75  | 0.317 | -1.22 | 0.030 | -1.1  | 0.332 | -1.2  | 0.043 |
| 1458416_at   | RIKEN cDNA A330048O09 gene                                                                                | A330048O09Rik | -1.09 | 0.526 | 1.32  | 0.605 | -1.1  | 0.508 | -1.02 | 0.713 | -1.2  | 0.030 |
| 1435990_at   | a disintegrin-like and metallopeptidase (reprolysin type) with thrombospondin type 1 motifs               | Adamts2       | -1.03 | 0.553 | -1.41 | 0.060 | -1.1  | 0.372 | 1.09  | 0.183 | -1.2  | 0.022 |
| 1422573_at   | AMP deaminase 3                                                                                           | Ampd3         | -1.05 | 0.212 | -1.35 | 0.001 | -1.11 | 0.050 | -1.17 | 0.022 | -1.2  | 0.024 |
| 1454717_at   | Ankyrin repeat domain 27 (VPS9 domain)                                                                    | Ankrd27       | 1.12  | 0.808 | -1.16 | 0.348 | -1.1  | 0.228 | -1.05 | 0.320 | -1.2  | 0.004 |
| 1436921_at   | ATPase, Cu++ transporting, alpha polypeptide                                                              | Atp7a         | -1.25 | 0.114 | -1.48 | 0.011 | 1.04  | 0.894 | -1.11 | 0.033 | -1.2  | 0.013 |
| 1447930_at   | bromodomain adjacent to zinc finger domain 1A                                                             | Baz1a         | 1.07  | 0.137 | 1.12  | 0.233 | -1.39 | 0.035 | -1.07 | 0.032 | -1.2  | 0.020 |
| 1419911_at   | Coronin, actin binding protein 1C                                                                         | Coro1c        | -1.01 | 0.567 | 1.01  | 0.626 | -1.17 | 0.384 | -1.13 | 0.085 | -1.2  | 0.040 |
| 1428969_at   | RIKEN cDNA D030074E01 gene                                                                                | D030074E01Rik | 1.3   | 0.274 | 1.2   | 0.901 | -1.13 | 0.071 | -1.15 | 0.016 | -1.2  | 0.010 |
| 1444744_at   | Death inducer-obliterator 1                                                                               | Dido1         | 1.1   | 0.657 | 1.14  | 0.712 | 1.03  | 0.938 | 1.72  | 0.198 | -1.2  | 0.021 |
| 1451591_a_at | ephrin B1                                                                                                 | Efnb1         | -1.03 | 0.393 | -1.11 | 0.315 | -1.18 | 0.120 | -1.13 | 0.156 | -1.2  | 0.050 |
| 1419184_a_at | four and a half LIM domains 2                                                                             | Fhl2          | 1.2   | 0.393 | -1.01 | 0.606 | -1.1  | 0.006 | -1.12 | 0.027 | -1.2  | 0.020 |
| 1453746_at   | formin binding protein 1                                                                                  | Fnbp1         | -1.27 | 0.369 | -1.42 | 0.298 | -1.25 | 0.021 | -1.29 | 0.023 | -1.2  | 0.042 |
| 1428354_at   | forkhead box K2                                                                                           | Foxk2         | -1.06 | 0.076 | -1.22 | 0.003 | -1.04 | 0.436 | -1.1  | 0.055 | -1.2  | 0.029 |
| 1456532_at   | Platelet-derived growth factor, D polypeptide                                                             | Pdgfd         | 1.31  | 0.392 | -1.01 | 0.513 | -1.14 | 0.055 | -1.11 | 0.002 | -1.2  | 0.042 |
| 1454090_at   | prenyl (solanesyl) diphosphate synthase, subunit 1                                                        | Pdss1         | 1.22  | 0.140 | 1.25  | 0.245 | -1.13 | 0.131 | 1.07  | 0.649 | -1.2  | 0.040 |
| 1451576_at   | protein kinase, DNA activated, catalytic polypeptide                                                      | Prkdc         | -1.54 | 0.136 | -2.07 | 0.103 | -1.13 | 0.355 | -1.01 | 0.879 | -1.2  | 0.009 |
| 1452211_at   | proteasome (prosome, macropain) activator subunit 4                                                       | Psme4         | 1.3   | 0.333 | 1.07  | 0.955 | -1.05 | 0.122 | -1.09 | 0.165 | -1.2  | 0.003 |
| 1448957_at   | recombining binding protein suppressor of hairless (Drosophila)                                           | Rbpsuh        | 1.08  | 0.414 | -1.03 | 0.681 | -1.04 | 0.529 | -1.19 | 0.010 | -1.2  | 0.017 |
| 1460567_at   | regulatory factor X domain containing 2 homolog (human)                                                   | Rfxdc2        | 1.01  | 0.713 | 1.08  | 0.885 | -1.15 | 0.215 | -1.25 | 0.142 | -1.2  | 0.009 |
| 1453054_at   | secretory carrier membrane protein 1                                                                      | Scamp1        | 1.33  | 0.915 | 1.02  | 0.578 | -1.13 | 0.219 | 1.21  | 0.214 | -1.2  | 0.042 |
| 1427035_at   | solute carrier family 39 (zinc transporter), member 14                                                    | Slc39a14      | 1.05  | 0.863 | -1.02 | 0.687 | -1.09 | 0.254 | -1.08 | 0.035 | -1.2  | 0.023 |
| 1422486_a_at | MAD homolog 4 (Drosophila)                                                                                | Smad4         | -1.11 | 0.449 | -1.27 | 0.334 | -1.03 | 0.296 | -1.17 | 0.005 | -1.2  | 0.012 |
| 1428527_at   | sorting nexin 7                                                                                           | Snx7          | 1.21  | 0.471 | 1.03  | 0.741 | -1.16 | 0.082 | -1.13 | 0.025 | -1.2  | 0.007 |
| 1451272_a_at | ubiquitin-conjugating enzyme E2F (putative)                                                               | Ube2f         | -1.12 | 0.417 | -1.23 | 0.319 | -1.11 | 0.088 | -1.15 | 0.065 | -1.2  | 0.003 |
| 1416156_at   | vinculin                                                                                                  | Vcl           | -1.05 | 0.137 | -1.4  | 0.008 | -1.17 | 0.015 | -1.19 | 0.001 | -1.2  | 0.001 |
| 1437358_at   | WD repeat and FYVE domain containing 1                                                                    | Wdfy1         | 1.07  | 0.506 | -1.07 | 0.237 | -1.21 | 0.036 | -1.09 | 0.099 | -1.2  | 0.010 |
| 1425972_a_at | zinc finger protein X-linked                                                                              | Zfx           | -1.02 | 0.668 | -1.04 | 0.113 | 1.01  | 0.866 | 1.02  | 0.924 | -1.2  | 0.002 |
| 1426531_at   | zinc finger, MYND domain containing 11                                                                    | Zmynd11       | -1.13 | 0.227 | -1.23 | 0.039 | -1.09 | 0.203 | -1.02 | 0.574 | -1.2  | 0.040 |
| 1428679_s_at | RIKEN cDNA 0610010K14 gene                                                                                | 0610010K14Rik | 1.18  | 0.340 | 1.24  | 0.003 | 1.09  | 0.385 | 1.03  | 0.772 | 1.2   | 0.039 |
| 1449902_at   | RIKEN cDNA 1110058A15 gene                                                                                | 1110058A15Rik | 1.64  | 0.927 | 1.95  | 0.615 | 1.71  | 0.246 | 1.1   | 0.189 | 1.2   | 0.019 |
| 1451313_a_at | RIKEN cDNA 1110067D22 gene                                                                                | 1110067D22Rik | -1.1  | 0.487 | 1.04  | 0.629 | 1.26  | 0.430 | 1.02  | 0.463 | 1.2   | 0.035 |
| 1428144_at   | RIKEN cDNA 1200011O22 gene                                                                                | 1200011O22Rik | -1    | 0.774 | 1.03  | 0.933 | 1.06  | 0.735 | 1.07  | 0.509 | 1.2   | 0.041 |
| 1423266_at   | RIKEN cDNA 2810405K02 gene                                                                                | 2810405K02Rik | -1.09 | 0.433 | 1.01  | 0.723 | 1.16  | 0.085 | 1.01  | 0.583 | 1.2   | 0.040 |
| 1424533_a_at | RIKEN cDNA 3110023B02 gene                                                                                | 3110023B02Rik | 1.05  | 0.689 | 1.23  | 0.071 | 1.17  | 0.054 | 1.19  | 0.128 | 1.2   | 0.003 |
| 1434681_at   | RIKEN cDNA 4932441K18 gene                                                                                | 4932441K18Rik | 1.51  | 0.190 | 1.29  | 0.305 | 1.01  | 0.820 | 1.14  | 0.132 | 1.2   | 0.049 |
| 1417142_at   | RIKEN cDNA 4932442K08 gene                                                                                | 4932442K08Rik | 1.17  | 0.063 | 1.37  | 0.059 | 1.05  | 0.880 | 1.17  | 0.003 | 1.2   | 0.017 |
| 1434313_at   | RIKEN cDNA 6330407D12 gene                                                                                | 6330407D12Rik | -1.17 | 0.320 | -1.16 | 0.365 | 1.29  | 0.060 | -1.04 | 0.483 | 1.2   | 0.005 |
| 1435163_at   | RIKEN cDNA 9030612M13 gene                                                                                | 9030612M13Rik | 1.08  | 0.210 | 1.23  | 0.077 | 1.07  | 0.640 | 1.12  | 0.165 | 1.2   | 0.026 |
| 1424212_at   | RIKEN cDNA 9430023L20 gene                                                                                | 9430023L20Rik | -1.03 | 0.712 | 1.32  | 0.024 | 1.16  | 0.016 | 1.07  | 0.091 | 1.2   | 0.027 |
| 1428275_at   | abhydrolase domain containing 13                                                                          | Abhd13        | 1.01  | 0.818 | 1.26  | 0.075 | 1.08  | 0.325 | 1.22  | 0.003 | 1.2   | 0.047 |
| 1424182_at   | acetyl-Coenzyme A acetyltransferase 1                                                                     | Acat1         | -1.09 | 0.238 | -1.16 | 0.365 | -1.09 | 0.299 | 1.05  | 0.784 | 1.2   | 0.036 |
| 1416631_at   | adaptor-related protein complex AP-4, beta 1                                                              | Ap4b1         | 1.22  | 0.516 | 1.38  | 0.031 | 1.28  | 0.009 | 1.08  | 0.246 | 1.2   | 0.002 |
| 1460328_at   | bromodomain containing 3                                                                                  | Brd3          | 1.03  | 0.839 | 1.18  | 0.369 | 1.03  | 0.818 | 1.14  | 0.045 | 1.2   | 0.049 |
| 1448326_a_at | cellular retinoic acid binding protein I                                                                  | Crabp1        | 1.05  | 0.270 | 1.08  | 0.307 | 1.07  | 0.539 | 1.03  | 0.586 | 1.2   | 0.035 |

|              |                                                                                              |               |       |       |       |       |       |       |       |       |      |       |
|--------------|----------------------------------------------------------------------------------------------|---------------|-------|-------|-------|-------|-------|-------|-------|-------|------|-------|
| 1449443_at   | 2,4-dienoyl CoA reductase 1, mitochondrial                                                   | Decr1         | -1.21 | 0.322 | -1.17 | 0.394 | 1     | 0.986 | 1.01  | 0.941 | 1.2  | 0.014 |
| 1426473_at   | DnaJ (Hsp40) homolog, subfamily C, member 9                                                  | Dnajc9        | 1.24  | 0.075 | 1.89  | 0.007 | 1.12  | 0.448 | 1.23  | 0.082 | 1.2  | 0.008 |
| 1433797_at   | RIKEN cDNA E130309D02 gene                                                                   | E130309D02Rik | -1.03 | 0.599 | 1.1   | 0.427 | 1.09  | 0.400 | 1.2   | 0.090 | 1.2  | 0.022 |
| 1416268_at   | E26 avian leukemia oncogene 2, 3' domain                                                     | Ets2          | 1.03  | 0.898 | 1.32  | 0.027 | 1.26  | 0.064 | 1.3   | 0.047 | 1.2  | 0.020 |
| 1416708_a_at | GRAM domain containing 1A                                                                    | Gramd1a       | -1.03 | 0.284 | 1.1   | 0.024 | 1.18  | 0.052 | 1.2   | 0.011 | 1.2  | 0.048 |
| 1451412_a_at | intraflagellar transport 20 homolog (Chlamydomonas)                                          | Ifit20        | -1.01 | 0.538 | -1.05 | 0.451 | -1.01 | 0.787 | 1.05  | 0.005 | 1.2  | 0.000 |
| 1441300_at   | potassium voltage-gated channel, subfamily F, member 1                                       | Kcnf1         | -1.18 | 0.362 | -1.27 | 0.294 | 1.01  | 0.953 | 1.06  | 0.550 | 1.2  | 0.019 |
| 1423071_x_at | hypothetical gene supported by BC019681; BC027236 /// hypothetical LOC LOC270335 /// LOI     |               | -1.06 | 0.518 | 1.02  | 0.874 | 1.28  | 0.001 | 1.26  | 0.008 | 1.2  | 0.023 |
| 1449705_x_at | minichromosome maintenance deficient 3 (S. cerevisiae) /// similar to DNA Mcm3 /// LOC6719   |               | 1.03  | 0.602 | 1.28  | 0.080 | 1.21  | 0.142 | -1.07 | 0.588 | 1.2  | 0.008 |
| 1423492_at   | mitochondrial ribosomal protein L45                                                          | Mrpl45        | -1.01 | 0.680 | 1.1   | 0.003 | 1.12  | 0.198 | 1.08  | 0.082 | 1.2  | 0.010 |
| 1423219_a_at | mitochondrial ribosomal protein L49                                                          | Mrpl49        | 1.02  | 0.997 | 1.18  | 0.440 | 1.08  | 0.431 | 1.11  | 0.198 | 1.2  | 0.025 |
| 1416543_at   | nuclear factor, erythroid derived 2, like 2                                                  | Nfe2l2        | 1.18  | 0.148 | 1.43  | 0.035 | 1.1   | 0.265 | 1.15  | 0.019 | 1.2  | 0.018 |
| 1418763_at   | nitrilase family, member 2                                                                   | Nit2          | 1.57  | 0.399 | 1.69  | 0.155 | 1.13  | 0.127 | 1.13  | 0.222 | 1.2  | 0.049 |
| 1455330_at   | nucleolar protein 9                                                                          | Nol9          | 1.14  | 0.446 | 1.32  | 0.012 | 1.04  | 0.198 | 1.14  | 0.009 | 1.2  | 0.019 |
| 1423627_at   | NAD(P)H dehydrogenase, quinone 1                                                             | Nqo1          | 1.05  | 0.458 | 1.09  | 0.200 | 1.1   | 0.421 | 1.13  | 0.152 | 1.2  | 0.033 |
| 1423344_at   | phosphatidic acid phosphatase type 2 domain containing 2                                     | Ppapdc2       | 1.12  | 0.151 | 1.13  | 0.338 | 1.32  | 0.237 | 1.22  | 0.090 | 1.2  | 0.037 |
| 1426426_at   | RNA binding motif protein 13                                                                 | Rbm13         | 1.14  | 0.266 | 1.39  | 0.052 | 1.15  | 0.030 | 1.2   | 0.008 | 1.2  | 0.017 |
| 1417438_at   | retinol dehydrogenase 14 (all-trans and 9-cis)                                               | Rdh14         | -1.03 | 0.643 | 1.17  | 0.137 | 1.19  | 0.221 | 1.14  | 0.007 | 1.2  | 0.018 |
| 1438665_at   | sphingomyelin phosphodiesterase 3, neutral                                                   | Smpd3         | -1.2  | 0.513 | 1.24  | 0.692 | -1.46 | 0.036 | 1.65  | 0.222 | 1.2  | 0.031 |
| 1432526_a_at | SNF8, ESCRT-II complex subunit, homolog (S. cerevisiae)                                      | Snf8          | 1.1   | 0.162 | 1.02  | 0.850 | 1.07  | 0.597 | 1.02  | 0.673 | 1.2  | 0.037 |
| 1417648_s_at | sorting nexin 5                                                                              | Snx5          | -1.02 | 0.698 | 1.01  | 0.747 | 1.16  | 0.092 | 1.16  | 0.013 | 1.2  | 0.041 |
| 1424427_at   | transcriptional adaptor 1 (HF11 homolog, yeast) like                                         | Tada11        | 1.68  | 0.188 | 1.78  | 0.069 | 1.31  | 0.059 | 1.13  | 0.081 | 1.2  | 0.040 |
| 1448882_at   | transmembrane protein 93                                                                     | Tmem93        | 1.03  | 0.298 | 1.26  | 0.011 | 1.13  | 0.022 | 1.16  | 0.014 | 1.2  | 0.012 |
| 1426427_at   | tubulin tyrosine ligase-like 1                                                               | Ttll1         | 1.99  | 0.673 | 2.15  | 0.458 | -1.05 | 0.362 | -1.01 | 0.776 | 1.2  | 0.002 |
| 1422714_at   | ubiquitin-conjugating enzyme E21 /// similar to Chain A, Human Ubiquitin-C-Ube2i /// LOC5462 |               | -1.28 | 0.329 | -1.08 | 0.529 | 1.1   | 0.233 | 1.05  | 0.212 | 1.2  | 0.011 |
| 1415810_at   | ubiquitin-like, containing PHD and RING finger domains, 1                                    | Uhrf1         | 1.18  | 0.367 | 1.64  | 0.002 | 1.21  | 0.207 | 1.04  | 0.715 | 1.2  | 0.018 |
| 1448162_at   | vascular cell adhesion molecule 1                                                            | Vcam1         | 1.22  | 0.191 | 1.34  | 0.014 | 1.38  | 0.091 | 1.17  | 0.071 | 1.2  | 0.016 |
| 1429634_at   | zinc finger protein 580                                                                      | Zfp580        | 1.04  | 0.899 | 1.07  | 0.977 | -1.03 | 0.648 | 1.07  | 0.114 | 1.2  | 0.031 |
| 1452756_at   | RIKEN cDNA 0610009J22 gene                                                                   | 0610009J22Rik | -1.09 | 0.414 | -1.01 | 0.758 | 1.17  | 0.025 | 1.09  | 0.235 | 1.21 | 0.026 |
| 1453485_s_at | RIKEN cDNA 1110005A03 gene                                                                   | 1110005A03Rik | 1.3   | 0.347 | 1.27  | 0.267 | 1.12  | 0.131 | 1.02  | 0.741 | 1.21 | 0.027 |
| 1452225_at   | RIKEN cDNA 2010106G01 gene                                                                   | 2010106G01Rik | 1.02  | 0.815 | 1.12  | 0.628 | 1.06  | 0.028 | 1.03  | 0.703 | 1.21 | 0.044 |
| 1423767_at   | RIKEN cDNA 2810410M20 gene                                                                   | 2810410M20Rik | 1.08  | 0.145 | 1.27  | 0.007 | 1.16  | 0.056 | 1.06  | 0.162 | 1.21 | 0.018 |
| 1441960_x_at | RIKEN cDNA 5730494M16 gene                                                                   | 5730494M16Rik | -1.11 | 0.447 | -1.09 | 0.467 | 1.2   | 0.001 | 1.01  | 0.758 | 1.21 | 0.000 |
| 1454682_at   | RIKEN cDNA A430005L14 gene                                                                   | A430005L14Rik | -1.06 | 0.546 | 1.19  | 0.876 | 1.2   | 0.077 | 1.28  | 0.007 | 1.21 | 0.033 |
| 1421292_a_at | RIKEN cDNA A730008L03 gene                                                                   | A730008L03Rik | 1.19  | 0.572 | 1.22  | 0.445 | 1.07  | 0.391 | 1.14  | 0.120 | 1.21 | 0.012 |
| 1453257_at   | 1-acylglycerol-3-phosphate O-acyltransferase 5 (lysophosphatidic acid acyl                   | Agpat5        | 1.05  | 0.578 | 1.16  | 0.198 | 1.04  | 0.052 | 1.04  | 0.093 | 1.21 | 0.007 |
| 1424545_at   | cDNA sequence BC003965                                                                       | BC003965      | -1.07 | 0.499 | 1.11  | 0.933 | 1.13  | 0.052 | 1.18  | 0.003 | 1.21 | 0.025 |
| 1451533_at   | cDNA sequence BC022687                                                                       | BC022687      | 1.27  | 0.827 | 1.81  | 0.093 | 1.35  | 0.006 | 1.13  | 0.046 | 1.21 | 0.038 |
| 1439422_a_at | C1q domain containing 2                                                                      | C1qdc2        | -1.17 | 0.366 | 1.07  | 0.821 | 1.09  | 0.063 | 1.08  | 0.090 | 1.21 | 0.042 |
| 1428485_at   | carbonic anhydrase 12                                                                        | Car12         | 1.18  | 0.505 | 1.23  | 0.232 | 1.03  | 0.879 | -1.01 | 0.774 | 1.21 | 0.010 |
| 1452937_s_at | coiled coil domain containing 28B                                                            | Ccdc28b       | 2.22  | 0.740 | 1.59  | 0.311 | 1.36  | 0.057 | -1.07 | 0.316 | 1.21 | 0.050 |
| 1455757_at   | DNA segment, Chr 3, ERATO Doi 254, expressed                                                 | D3Etd254e     | 1.11  | 0.415 | 1.28  | 0.212 | 1.01  | 0.935 | 1.21  | 0.019 | 1.21 | 0.048 |
| 1423571_at   | endothelial differentiation sphingolipid G-protein-coupled receptor 1                        | Edg1          | 2.03  | 0.454 | 3.08  | 0.114 | 1.1   | 0.570 | 1.01  | 0.788 | 1.21 | 0.045 |
| 1429411_a_at | enhancer of yellow 2 homolog (Drosophila)                                                    | Eny2          | -1.16 | 0.435 | 1.01  | 0.797 | 1.15  | 0.406 | -1    | 0.946 | 1.21 | 0.048 |
| 1435561_at   | Ets2 repressor factor                                                                        | Erf           | -1.1  | 0.160 | -1.05 | 0.638 | 1.18  | 0.054 | -1.03 | 0.594 | 1.21 | 0.047 |
| 1438945_x_at | gap junction membrane channel protein alpha 1                                                | Gja1          | -1.15 | 0.494 | 1.04  | 0.901 | 1.27  | 0.110 | 1     | 0.896 | 1.21 | 0.046 |
| 1436887_x_at | glutamate-rich WD repeat containing 1                                                        | Grwd1         | -1.28 | 0.376 | -1.01 | 0.553 | 1.04  | 0.926 | 1.1   | 0.262 | 1.21 | 0.041 |
| 1425196_a_at | histidine triad nucleotide binding protein 2                                                 | Hint2         | -1.19 | 0.410 | 1.05  | 0.558 | 1.25  | 0.026 | 1.25  | 0.004 | 1.21 | 0.011 |
| 1427100_at   | meteorin, glial cell differentiation regulator                                               | Metrn         | -1.11 | 0.261 | 1.01  | 0.983 | -1.02 | 0.947 | -1.01 | 0.853 | 1.21 | 0.009 |
| 1422471_at   | peroxisomal biogenesis factor 13                                                             | Pex13         | 1.07  | 0.714 | 1.47  | 0.013 | 1.17  | 0.012 | 1.24  | 0.000 | 1.21 | 0.008 |
| 1426085_a_at | paxillin                                                                                     | Pxn           | 2     | 0.697 | 1.61  | 0.749 | 1.03  | 0.786 | 1.21  | 0.240 | 1.21 | 0.044 |
| 1448899_s_at | RAD51 associated protein 1                                                                   | Rad51ap1      | 1.21  | 0.064 | 1.38  | 0.022 | 1.06  | 0.392 | 1.22  | 0.033 | 1.21 | 0.029 |
| 1416229_at   | riboflavin kinase                                                                            | Rfk           | 1.2   | 0.282 | 1.37  | 0.067 | 1.05  | 0.719 | 1.19  | 0.062 | 1.21 | 0.033 |
| 1424837_at   | ring finger protein 113A1                                                                    | Rnf113a1      | 1.55  | 0.149 | 1.73  | 0.061 | 1.04  | 0.444 | 1.06  | 0.633 | 1.21 | 0.022 |
| 1455060_at   | Ras-GTPase-activating protein SH3-domain binding protein                                     | RP23-336J1.4  | 2.38  | 0.486 | 2.69  | 0.479 | 1.1   | 0.207 | 1.19  | 0.042 | 1.21 | 0.047 |
| 1417041_at   | RNA polymerase 1-1                                                                           | Rpo1-1        | -1.02 | 0.381 | 1.18  | 0.199 | 1.1   | 0.283 | 1.13  | 0.010 | 1.21 | 0.006 |
| 1422676_at   | SWI/SNF related, matrix associated, actin dependent regulator of chromatin                   | Smarce1       | 1.04  | 0.501 | 1.27  | 0.002 | 1.18  | 0.048 | 1.14  | 0.035 | 1.21 | 0.013 |
| 1441415_at   | Sprouty-related, EVH1 domain containing 2                                                    | Spred2        | 1.15  | 0.864 | 1.12  | 0.876 | 1.08  | 0.762 | 1.43  | 0.347 | 1.21 | 0.011 |

|              |                                                                              |                   |       |       |       |       |       |       |       |       |      |       |
|--------------|------------------------------------------------------------------------------|-------------------|-------|-------|-------|-------|-------|-------|-------|-------|------|-------|
| 1417334_at   | serine/threonine kinase 19                                                   | Stk19             | 1.22  | 0.124 | 1.22  | 0.052 | 1.07  | 0.172 | 1.12  | 0.240 | 1.21 | 0.033 |
| 1455871_s_at | Tax1 (human T-cell leukemia virus type I) binding protein 3 /// ribosomal pr | Tax1bp3 /// Rpl13 | -1.09 | 0.441 | 1.11  | 0.573 | 1.15  | 0.067 | 1.1   | 0.004 | 1.21 | 0.027 |
| 1425249_a_at | TYRO3 protein tyrosine kinase 3                                              | Tyro3             | 1.61  | 0.698 | 1.78  | 0.857 | 1.38  | 0.100 | 1.1   | 0.451 | 1.21 | 0.014 |
| 1452880_at   | zinc finger, HIT type 3                                                      | Znhit3            | 1.19  | 0.211 | 1.43  | 0.003 | 1.22  | 0.043 | 1.1   | 0.274 | 1.21 | 0.017 |
| 1434697_at   | RIKEN cDNA 1110001P04 gene                                                   | 1110001P04Rik     | 1.22  | 0.127 | 1.62  | 0.013 | 1.13  | 0.241 | 1.07  | 0.108 | 1.22 | 0.004 |
| 1428675_at   | RIKEN cDNA 1110049F12 gene                                                   | 1110049F12Rik     | 1.02  | 0.878 | 1.22  | 0.092 | 1.24  | 0.021 | 1.08  | 0.378 | 1.22 | 0.041 |
| 1428381_a_at | RIKEN cDNA 2700038C09 gene                                                   | 2700038C09Rik     | 1.03  | 0.501 | 1.18  | 0.156 | 1.08  | 0.342 | 1.02  | 0.640 | 1.22 | 0.028 |
| 1435200_at   | RIKEN cDNA 6330419J24 gene                                                   | 6330419J24Rik     | 1.37  | 0.832 | 1.84  | 0.202 | 2.08  | 0.527 | 1.76  | 0.222 | 1.22 | 0.029 |
| 1438941_x_at | adenosine monophosphate deaminase 2 (isoform L)                              | Ampd2             | -1.28 | 0.349 | 1.02  | 0.650 | 1.15  | 0.152 | 1.17  | 0.026 | 1.22 | 0.041 |
| 1447903_x_at | adaptor-related protein complex 1, sigma 2 subunit                           | Ap1s2             | -1.09 | 0.473 | 1.11  | 0.762 | 1.2   | 0.015 | 1.19  | 0.028 | 1.22 | 0.041 |
| 1416960_at   | beta-1,3-glucuronyltransferase 3 (glucuronosyltransferase I)                 | B3gat3            | 1.15  | 0.633 | 1.14  | 0.597 | 1.2   | 0.056 | 1.21  | 0.055 | 1.22 | 0.047 |
| 1427947_at   | cDNA sequence BC028440                                                       | BC028440          | 1.12  | 0.043 | 1.12  | 0.115 | 1.09  | 0.054 | -1.05 | 0.120 | 1.22 | 0.001 |
| 1421122_at   | Casitas B-lineage lymphoma-like 1                                            | Cbl1              | -1.02 | 0.677 | 1.14  | 0.819 | 1.02  | 0.641 | 1.13  | 0.070 | 1.22 | 0.033 |
| 1452702_at   | chloride channel 7                                                           | Clcn7             | -1.12 | 0.398 | 1.01  | 0.817 | 1.1   | 0.543 | 1.08  | 0.209 | 1.22 | 0.015 |
| 1415920_at   | cleavage stimulation factor, 3' pre-RNA subunit 2, tau                       | Cstf2t            | -1.06 | 0.459 | 1.23  | 0.181 | 1.15  | 0.199 | 1.17  | 0.022 | 1.22 | 0.002 |
| 1434607_at   | DEAD (Asp-Glu-Ala-Asp) box polypeptide 52                                    | Ddx52             | -1.02 | 0.626 | 1.27  | 0.145 | 1.15  | 0.066 | 1.26  | 0.006 | 1.22 | 0.030 |
| 1417167_at   | exosome component 5                                                          | Exosc5            | 1.77  | 0.238 | 1.91  | 0.280 | -1.01 | 0.843 | 1.11  | 0.254 | 1.22 | 0.045 |
| 1434991_at   | F-box and WD-40 domain protein 17                                            | Fbxw17            | 1.53  | 0.217 | 1.51  | 0.171 | 1.09  | 0.774 | 1.24  | 0.005 | 1.22 | 0.008 |
| 1416046_a_at | fucosidase, alpha-L- 2, plasma                                               | Fuca2             | 1.27  | 0.344 | 1.39  | 0.339 | 1.15  | 0.158 | 1.08  | 0.213 | 1.22 | 0.009 |
| 1438195_at   | glycerol-3-phosphate dehydrogenase 1-like /// similar to glycerol-3-phosph   | Gpd1l /// LOC6725 | 1.13  | 0.298 | -1.03 | 0.547 | 1.06  | 0.465 | 1.09  | 0.230 | 1.22 | 0.015 |
| 1448273_at   | glutathione synthetase                                                       | Gss               | 1.1   | 0.504 | 1.29  | 0.007 | 1.15  | 0.005 | 1.11  | 0.003 | 1.22 | 0.028 |
| 1417101_at   | heat shock protein 2                                                         | Hspa2             | -1.34 | 0.171 | -1.05 | 0.549 | 1.08  | 0.053 | -1.01 | 0.919 | 1.22 | 0.044 |
| 1453784_at   | integrin-linked kinase-associated serine/threonine phosphatase 2C            | Ilkap             | -1.01 | 0.658 | -1.08 | 0.446 | -1.1  | 0.322 | 1     | 0.927 | 1.22 | 0.011 |
| 1416106_at   | KTI12 homolog, chromatin associated (S. cerevisiae)                          | Kti12             | 1.11  | 0.270 | 1.43  | 0.013 | 1.16  | 0.005 | 1.2   | 0.008 | 1.22 | 0.013 |
| 1437014_x_at | similar to Peroxiredoxin 1 (Thioredoxin peroxidase 2) (Thioredoxin-depend    | LOC545161 /// LOI | -1.34 | 0.286 | -1.12 | 0.513 | 1.06  | 0.672 | -1.13 | 0.317 | 1.22 | 0.035 |
| 1437481_at   | hypothetical LOC623451                                                       | LOC623451         | -1.24 | 0.255 | 1.24  | 0.604 | 1.25  | 0.047 | 1.14  | 0.103 | 1.22 | 0.023 |
| 1422498_at   | melanoma antigen, family H, 1                                                | Mageh1            | 1.21  | 0.209 | 1.07  | 0.279 | -1.14 | 0.170 | 1.22  | 0.225 | 1.22 | 0.039 |
| 1434676_at   | myotubularin related protein 9                                               | Mtmr9             | -1.17 | 0.349 | -1.15 | 0.330 | 1.05  | 0.407 | 1.03  | 0.518 | 1.22 | 0.034 |
| 1416536_at   | melanoma associated antigen (mutated) 1                                      | Mum1              | -1.17 | 0.312 | 1.04  | 0.887 | 1.18  | 0.184 | 1.18  | 0.067 | 1.22 | 0.019 |
| 1416750_at   | opioid receptor, sigma 1                                                     | Oprs1             | 1.39  | 0.476 | 1.58  | 0.160 | 1.15  | 0.030 | 1.13  | 0.206 | 1.22 | 0.042 |
| 1451969_s_at | poly (ADP-ribose) polymerase family, member 3                                | Parp3             | 1.12  | 0.444 | 1.12  | 0.335 | -1.07 | 0.265 | 1.1   | 0.178 | 1.22 | 0.002 |
| 1425042_s_at | proline, glutamic acid and leucine rich protein 1                            | Pelp1             | -1.44 | 0.236 | -1.14 | 0.412 | 1.06  | 0.764 | 1.02  | 0.949 | 1.22 | 0.024 |
| 1439266_a_at | polymerase (RNA) III (DNA directed) polypeptide K                            | Polr3k            | -1.03 | 0.626 | 1.16  | 0.855 | 1.19  | 0.055 | 1.16  | 0.005 | 1.22 | 0.011 |
| 1439403_x_at | ring finger protein 12                                                       | Rnf12             | -1.34 | 0.346 | -1.14 | 0.445 | 1.04  | 0.673 | -1.03 | 0.588 | 1.22 | 0.015 |
| 1448674_at   | ring finger protein 25                                                       | Rnf25             | 1.08  | 0.939 | 1.3   | 0.041 | 1.15  | 0.083 | 1.17  | 0.081 | 1.22 | 0.031 |
| 1419814_s_at | S100 calcium binding protein A1                                              | S100a1            | -1.02 | 0.564 | -1.01 | 0.884 | 1.08  | 0.560 | 1.07  | 0.189 | 1.22 | 0.008 |
| 1430300_at   | SCO cytochrome oxidase deficient homolog 1 (yeast)                           | Sco1              | -1.25 | 0.125 | 1.03  | 0.997 | 1.04  | 0.397 | -1.1  | 0.430 | 1.22 | 0.011 |
| 1424776_a_at | solute carrier family 25, member 28                                          | Slc25a28          | -1.08 | 0.487 | 1.08  | 0.844 | 1.11  | 0.199 | 1.16  | 0.004 | 1.22 | 0.034 |
| 1428597_at   | TBC1 domain family, member 9B                                                | Tbc1d9b           | -1.11 | 0.088 | -1.03 | 0.586 | 1.21  | 0.269 | 1.12  | 0.298 | 1.22 | 0.029 |
| 1441926_x_at | transmembrane inner ear                                                      | Tmie              | 1.15  | 0.335 | -1.43 | 0.021 | 2.32  | 0.448 | 1.4   | 0.785 | 1.22 | 0.021 |
| 1428678_s_at | WD repeat domain 73                                                          | Wdr73             | -1.01 | 0.808 | 1.25  | 0.047 | 1.24  | 0.016 | 1.2   | 0.055 | 1.22 | 0.024 |
| 1430134_a_at | tyrosyl-tRNA synthetase 2 (mitochondrial)                                    | Yars2             | 1.26  | 0.195 | 1.47  | 0.011 | 1.11  | 0.412 | 1.05  | 0.589 | 1.22 | 0.020 |
| 1433503_at   | zinc binding alcohol dehydrogenase, domain containing 1                      | Zadh1             | -1.01 | 0.734 | 1.11  | 0.421 | 1.09  | 0.251 | 1.1   | 0.048 | 1.22 | 0.014 |
| 1418820_s_at | zinc finger, CCHC domain containing 10                                       | Zcchc10           | -1.12 | 0.451 | 1.13  | 0.619 | 1.23  | 0.178 | 1.07  | 0.405 | 1.22 | 0.013 |
| 1438026_at   | zinc finger protein 560                                                      | Zfp560            | -1.03 | 0.584 | 1.04  | 0.754 | 1.16  | 0.092 | 1.04  | 0.759 | 1.22 | 0.039 |
| 1448760_at   | zinc finger protein 68                                                       | Zfp68             | 1.09  | 0.626 | 1.39  | 0.196 | 1.12  | 0.406 | 1.05  | 0.987 | 1.22 | 0.002 |
| 1438793_x_at | RIKEN cDNA 1200007D18 gene                                                   | 1200007D18Rik     | 1.17  | 0.801 | 1.24  | 0.901 | -1.08 | 0.480 | -1.17 | 0.375 | 1.23 | 0.014 |
| 1451334_at   | RIKEN cDNA 1810009O10 gene                                                   | 1810009O10Rik     | -1.01 | 0.786 | 1.3   | 0.078 | 1.13  | 0.010 | 1.2   | 0.005 | 1.23 | 0.048 |
| 1436339_at   | RIKEN cDNA 1810058I24 gene                                                   | 1810058I24Rik     | -1.04 | 0.667 | -1.27 | 0.161 | 1.08  | 0.569 | -1.15 | 0.248 | 1.23 | 0.014 |
| 1456204_at   | RIKEN cDNA 2010107H07 gene                                                   | 2010107H07Rik     | -1.14 | 0.449 | 1.04  | 0.603 | 1.14  | 0.051 | 1.11  | 0.188 | 1.23 | 0.017 |
| 1424687_at   | RIKEN cDNA 2700008B19 gene                                                   | 2700008B19Rik     | 1.5   | 0.485 | 1.7   | 0.255 | -1.09 | 0.542 | 1.01  | 0.733 | 1.23 | 0.021 |
| 1422628_at   | RIKEN cDNA 4632417K18 gene                                                   | 4632417K18Rik     | 1.29  | 0.065 | 1.66  | 0.013 | 1.21  | 0.004 | 1.27  | 0.002 | 1.23 | 0.018 |
| 1429172_a_at | RIKEN cDNA 5730507H05 gene                                                   | 5730507H05Rik     | -1.08 | 0.651 | -1.14 | 0.345 | 1.08  | 0.408 | 1.13  | 0.403 | 1.23 | 0.008 |
| 1435497_at   | RIKEN cDNA 5730590G19 gene                                                   | 5730590G19Rik     | 2.57  | 0.108 | 2.69  | 0.011 | 1.14  | 0.437 | 1.09  | 0.390 | 1.23 | 0.037 |
| 1448318_at   | adipose differentiation related protein                                      | Adfp              | -1    | 0.917 | 1.22  | 0.056 | 1.2   | 0.034 | 1.14  | 0.108 | 1.23 | 0.002 |
| 1429850_x_at | alkB, alkylation repair homolog 4 (E. coli)                                  | Alkbh4            | -1.21 | 0.372 | 1.05  | 0.631 | 1.17  | 0.102 | 1.24  | 0.022 | 1.23 | 0.033 |
| 1453681_at   | ATPase inhibitory factor 1                                                   | Atpif1            | 1.1   | 0.835 | 1.16  | 0.723 | 1.24  | 0.586 | 1.19  | 0.158 | 1.23 | 0.022 |
| 1424429_s_at | coiled-coil domain containing 95                                             | Ccdc95            | -1.04 | 0.555 | 1.33  | 0.001 | 1.17  | 0.385 | 1.25  | 0.003 | 1.23 | 0.023 |

|              |                                                                              |                    |       |       |       |       |       |       |       |       |      |       |
|--------------|------------------------------------------------------------------------------|--------------------|-------|-------|-------|-------|-------|-------|-------|-------|------|-------|
| 1448182_a_at | CD24a antigen                                                                | Cd24a              | -1.07 | 0.528 | 1.14  | 0.794 | 1.37  | 0.048 | 1.18  | 0.011 | 1.23 | 0.013 |
| 1455723_at   | DNA segment, Chr 1, ERATO Doi 448, expressed                                 | D1ErtD448e         | 1.95  | 0.648 | 2.24  | 0.125 | 1.33  | 0.060 | 1.21  | 0.018 | 1.23 | 0.046 |
| 1448270_at   | DEAD (Asp-Glu-Ala-Asp) box polypeptide 21                                    | Ddx21              | -1.03 | 0.469 | 1.2   | 0.053 | 1.17  | 0.048 | 1.07  | 0.168 | 1.23 | 0.032 |
| 1452097_a_at | dual specificity phosphatase 7 /// similar to dual specificity phosphatase 7 | Dusp7 /// LOC6745  | 1.5   | 0.314 | 2.06  | 0.091 | 1.19  | 0.144 | 1.3   | 0.017 | 1.23 | 0.031 |
| 1460679_at   | exosome component 4                                                          | Exosc4             | -1.2  | 0.094 | 1.11  | 0.523 | 1.21  | 0.100 | 1.12  | 0.103 | 1.23 | 0.015 |
| 1432211_a_at | f-box only protein 9                                                         | Fbxo9              | 1.13  | 0.969 | -1.02 | 0.445 | 1.2   | 0.296 | -1.05 | 0.580 | 1.23 | 0.013 |
| 1448241_at   | GM2 ganglioside activator protein                                            | Gm2a               | -1.24 | 0.360 | -1.26 | 0.329 | 1.08  | 0.592 | -1.01 | 0.735 | 1.23 | 0.005 |
| 1419205_x_at | G patch domain containing 4                                                  | Gpatc4             | -1.14 | 0.053 | 1.14  | 0.545 | 1.11  | 0.106 | 1.18  | 0.334 | 1.23 | 0.047 |
| 1435948_at   | G protein-coupled receptor 178                                               | Gpr178             | 1.09  | 0.147 | 1.18  | 0.167 | 1.16  | 0.082 | 1.06  | 0.291 | 1.23 | 0.024 |
| 1456032_x_at | H2A histone family, member Z /// similar to H2A histone family, member Z     | H2afz /// LOC6666  | -1.3  | 0.257 | -1.2  | 0.377 | 1.09  | 0.564 | -1.11 | 0.293 | 1.23 | 0.025 |
| 1451252_at   | interferon regulatory factor 2 binding protein 1                             | Irf2bp1            | -1.14 | 0.013 | 1.12  | 0.240 | 1.12  | 0.129 | 1.14  | 0.197 | 1.23 | 0.005 |
| 1423104_at   | insulin receptor substrate 1                                                 | Irs1               | 1.41  | 0.165 | 1.98  | 0.109 | 1.32  | 0.007 | 1.33  | 0.004 | 1.23 | 0.017 |
| 1421344_a_at | ajuba                                                                        | Jub                | 1.34  | 0.383 | 1.51  | 0.121 | 1.21  | 0.104 | 1.04  | 0.427 | 1.23 | 0.023 |
| 1424372_at   | mitochondrial ribosomal protein L32                                          | Mrpl32             | 1.17  | 0.156 | 1.46  | 0.034 | 1.21  | 0.146 | 1.24  | 0.053 | 1.23 | 0.021 |
| 1459874_s_at | myotubularin related protein 4                                               | Mtmr4              | -1.22 | 0.383 | -1.03 | 0.560 | 1.17  | 0.028 | 1.11  | 0.140 | 1.23 | 0.002 |
| 1455035_s_at | nucleolar protein 5A                                                         | Nol5a              | -1.09 | 0.417 | 1.26  | 0.522 | 1.18  | 0.067 | 1.35  | 0.002 | 1.23 | 0.011 |
| 1434216_a_at | nudix (nucleoside diphosphate linked moiety X)-type motif 19                 | Nudt19             | 1.04  | 0.206 | 1.12  | 0.190 | 1.13  | 0.057 | 1.13  | 0.039 | 1.23 | 0.021 |
| 1428080_at   | phosphoglycerate mutase family member 5                                      | Pgam5              | 1.08  | 0.783 | 1.26  | 0.023 | 1.07  | 0.384 | 1.13  | 0.033 | 1.23 | 0.037 |
| 1435821_s_at | protein phosphatase 1, regulatory (inhibitor) subunit 8                      | Ppp1r8             | -1.17 | 0.420 | 1.24  | 0.745 | 1.26  | 0.058 | 1.03  | 0.669 | 1.23 | 0.033 |
| 1420664_s_at | protein C receptor, endothelial                                              | Procr              | -1.07 | 0.028 | 1.09  | 0.361 | 1.17  | 0.247 | 1.08  | 0.132 | 1.23 | 0.032 |
| 1456566_x_at | RNA binding motif protein 14                                                 | Rbm14              | -1.31 | 0.280 | 1.06  | 0.705 | 1.01  | 0.907 | 1.16  | 0.011 | 1.23 | 0.036 |
| 1428905_at   | Ras-related GTP binding A                                                    | Rraga              | 1.41  | 0.300 | 1.58  | 0.012 | 1.12  | 0.009 | 1.58  | 0.002 | 1.23 | 0.012 |
| 1426241_a_at | sex comb on midleg homolog 1                                                 | Scmh1              | 1.08  | 0.440 | 1.53  | 0.022 | 1.13  | 0.010 | 1.22  | 0.008 | 1.23 | 0.035 |
| 1428364_at   | sodium channel modifier 1                                                    | Scnm1              | 1.21  | 0.176 | 1.33  | 0.189 | -1.04 | 0.542 | 1.03  | 0.915 | 1.23 | 0.042 |
| 1430388_a_at | sulfatase 2                                                                  | Sulf2              | 1.8   | 0.377 | 1.86  | 0.125 | 1.04  | 0.302 | 1.03  | 0.891 | 1.23 | 0.045 |
| 1424213_at   | UbiA prenyltransferase domain containing 1                                   | Ubiad1             | 1.2   | 0.311 | 1.3   | 0.134 | 1.09  | 0.532 | 1.2   | 0.067 | 1.23 | 0.043 |
| 1434859_at   | uridine monophosphate synthetase                                             | Umps               | -1.01 | 0.737 | 1.25  | 0.283 | 1.16  | 0.006 | 1.18  | 0.033 | 1.23 | 0.037 |
| 1454846_at   | UTP15, U3 small nucleolar ribonucleoprotein, homolog (yeast)                 | Utp15              | -1.08 | 0.475 | 1.21  | 0.151 | 1.24  | 0.003 | 1.23  | 0.010 | 1.23 | 0.038 |
| 1457736_at   | vacuolar protein sorting 37D (yeast)                                         | Vps37d             | -1.18 | 0.099 | 1.09  | 0.184 | 1.11  | 0.489 | -1.13 | 0.384 | 1.23 | 0.024 |
| 1451728_at   | WD repeat domain 13                                                          | Wdr13              | 1.16  | 0.298 | 1.15  | 0.166 | 1.18  | 0.021 | 1.16  | 0.197 | 1.23 | 0.001 |
| 1438218_at   | zinc finger and BTB domain containing 24                                     | Zbtb24             | -1.07 | 0.498 | -1.1  | 0.405 | 1.05  | 0.634 | 1.08  | 0.253 | 1.23 | 0.032 |
| 1449972_s_at | zinc finger protein 97 /// cDNA sequence BC018101                            | Zfp97 /// BC018101 | 1.03  | 0.591 | 1.3   | 0.101 | 1.14  | 0.495 | 1.2   | 0.058 | 1.23 | 0.031 |
| 1436554_at   | zinc finger protein, subfamily 1A, 5                                         | Zfpn1a5            | -1.01 | 0.667 | 1.24  | 0.667 | 1.1   | 0.285 | -1.07 | 0.256 | 1.23 | 0.002 |
| 1433946_at   | zinc finger protein interacting with K protein 1                             | Zik1               | 1.13  | 0.031 | 1.44  | 0.041 | 1.36  | 0.002 | 1.22  | 0.041 | 1.23 | 0.015 |
| 1428332_at   | RIKEN cDNA 1500004A08 gene                                                   | 1500004A08Rik      | 2.22  | 0.272 | 2.95  | 0.231 | 1.13  | 0.118 | 1.24  | 0.290 | 1.24 | 0.028 |
| 1450057_at   | RIKEN cDNA 2610042O14 gene                                                   | 2610042O14Rik      | 1.13  | 0.410 | 1.07  | 0.757 | 1.02  | 0.902 | 1.06  | 0.641 | 1.24 | 0.006 |
| 1453226_at   | RIKEN cDNA 3000004C01 gene                                                   | 3000004C01Rik      | 1.15  | 0.254 | 1.37  | 0.062 | 1.13  | 0.392 | 1.13  | 0.034 | 1.24 | 0.041 |
| 1429165_at   | RIKEN cDNA 3110001I22 gene                                                   | 3110001I22Rik      | -1.05 | 0.500 | 1.18  | 0.984 | -1.03 | 0.757 | -1.01 | 0.750 | 1.24 | 0.043 |
| 1418996_a_at | RIKEN cDNA 4930469P12 gene                                                   | 4930469P12Rik      | 1.14  | 0.118 | 1.19  | 0.201 | 1.18  | 0.037 | 1.23  | 0.011 | 1.24 | 0.037 |
| 1428457_at   | RIKEN cDNA 5830472M02 gene                                                   | 5830472M02Rik      | 1.29  | 0.161 | 1.57  | 0.024 | 1.18  | 0.058 | 1.21  | 0.005 | 1.24 | 0.016 |
| 1444061_at   | RIKEN cDNA A030004J04 gene                                                   | A030004J04Rik      | 1.23  | 0.715 | 1.49  | 0.677 | 1.21  | 0.069 | 1.3   | 0.058 | 1.24 | 0.003 |
| 1441068_at   | RIKEN cDNA A130001G05 gene                                                   | A130001G05Rik      | 1.77  | 0.697 | 1.86  | 0.664 | -1.09 | 0.818 | 1.78  | 0.142 | 1.24 | 0.012 |
| 1456336_at   | RIKEN cDNA A330102K23 gene                                                   | A330102K23Rik      | 1.24  | 0.894 | -1.22 | 0.367 | -1.07 | 0.592 | -1.46 | 0.234 | 1.24 | 0.035 |
| 1418279_a_at | A kinase (PRKA) anchor protein 1                                             | Akap1              | 2.75  | 0.439 | 3.76  | 0.218 | 1.19  | 0.271 | 1.36  | 0.007 | 1.24 | 0.017 |
| 1419115_at   | asparagine-linked glycosylation 14 homolog (yeast)                           | Alg14              | -1.06 | 0.540 | -1.08 | 0.537 | 1.14  | 0.504 | -1.06 | 0.495 | 1.24 | 0.030 |
| 1418250_at   | ADP-ribosylation factor 4-like                                               | Arf4               | 1.06  | 0.604 | 1.05  | 0.560 | -1.01 | 0.401 | 1.13  | 0.271 | 1.24 | 0.024 |
| 1454197_a_at | coiled-coil domain containing 86                                             | Ccdc86             | 1.61  | 0.509 | 2.12  | 0.035 | 1.04  | 0.332 | 1.14  | 0.094 | 1.24 | 0.010 |
| 1424144_at   | chromatin licensing and DNA replication factor 1                             | Cdt1               | 1.34  | 0.456 | 1.63  | 0.057 | 1.13  | 0.002 | 1.23  | 0.096 | 1.24 | 0.007 |
| 1426886_at   | ceroid-lipofuscinosis, neuronal 5                                            | Cln5               | 1.65  | 0.194 | 1.86  | 0.160 | 1.2   | 0.015 | 1.1   | 0.210 | 1.24 | 0.012 |
| 1435281_at   | carnitine palmitoyltransferase 1c                                            | Cpt1c              | 1.16  | 0.207 | 1.35  | 0.020 | 1.18  | 0.159 | 1.1   | 0.139 | 1.24 | 0.046 |
| 1419645_at   | cleavage stimulation factor, 3' pre-RNA subunit 2                            | Cstf2              | 1.23  | 0.163 | 1.33  | 0.023 | 1.14  | 0.043 | 1.09  | 0.063 | 1.24 | 0.003 |
| 1440085_at   | ectodysplasin A2 isoform receptor                                            | Eda2r              | 1.43  | 0.232 | 2.18  | 0.029 | 1.35  | 0.006 | 1.15  | 0.032 | 1.24 | 0.006 |
| 1422430_at   | fidgin-like 1                                                                | Fignl1             | 1.14  | 0.108 | 1.33  | 0.116 | 1.34  | 0.052 | 1.25  | 0.018 | 1.24 | 0.045 |
| 1429403_x_at | glycosyltransferase 8 domain containing 2                                    | Glt8d2             | -1.03 | 0.658 | 1.05  | 0.971 | -1.07 | 0.476 | -1.01 | 0.784 | 1.24 | 0.046 |
| 1436930_x_at | hydroxymethylbilane synthase /// similar to hydroxymethylbilane synthase     | Hmbs /// LOC6238   | -1.06 | 0.457 | 1.01  | 0.657 | 1.34  | 0.173 | -1.09 | 0.378 | 1.24 | 0.016 |
| 1448167_at   | interferon gamma receptor 1                                                  | Ifngr1             | -1.03 | 0.687 | 1.23  | 0.237 | 1.27  | 0.182 | 1.13  | 0.009 | 1.24 | 0.010 |
| 1452144_a_at | mitochondrial ribosomal protein L44                                          | Mrpl44             | -1.12 | 0.459 | -1.03 | 0.549 | -1    | 0.801 | 1.05  | 0.099 | 1.24 | 0.022 |
| 1449559_at   | homeo box, msh-like 2                                                        | Msx2               | 1.21  | 0.051 | 1.4   | 0.002 | 1.13  | 0.346 | 1.13  | 0.015 | 1.24 | 0.015 |



|              |                                                                              |                    |       |       |       |       |       |       |       |       |      |       |
|--------------|------------------------------------------------------------------------------|--------------------|-------|-------|-------|-------|-------|-------|-------|-------|------|-------|
| 1448967_at   | nipsnap homolog 3A (C. elegans)                                              | Nipsnap3a          | 1.14  | 0.276 | 1.28  | 0.113 | 1.16  | 0.110 | 1.04  | 0.232 | 1.24 | 0.031 |
| 1424839_a_at | NOL1/NOP2/Sun domain family, member 4                                        | Nsun4              | 1.23  | 0.051 | 1.59  | 0.009 | 1.28  | 0.047 | 1.31  | 0.001 | 1.24 | 0.002 |
| 1449017_at   | nuclear transport factor 2                                                   | Nuff2              | 1.22  | 0.263 | 1.52  | 0.011 | 1.16  | 0.093 | 1.23  | 0.004 | 1.24 | 0.002 |
| 1425784_a_at | olfactomedin 1                                                               | Olfm1              | -1.22 | 0.025 | -1.18 | 0.259 | 1.19  | 0.287 | -1.03 | 0.527 | 1.24 | 0.047 |
| 1451069_at   | proviral integration site 3                                                  | Pim3               | 1.91  | 0.665 | 1.61  | 0.611 | 1.12  | 0.380 | 1.23  | 0.031 | 1.24 | 0.006 |
| 1441848_at   | Phosphomannomutase 2                                                         | Pmm2               | 1.06  | 0.500 | 1.17  | 0.594 | 1.07  | 0.337 | 1.49  | 0.062 | 1.24 | 0.005 |
| 1450519_a_at | protein kinase, cAMP dependent, catalytic, alpha                             | Prkaca             | -1.13 | 0.284 | -1.02 | 0.771 | 1.11  | 0.426 | -1.07 | 0.380 | 1.24 | 0.043 |
| 1417323_at   | proline/serine-rich coiled-coil 1                                            | Psrc1              | 1.09  | 0.506 | 1.46  | 0.007 | 1.22  | 0.004 | 1.16  | 0.006 | 1.24 | 0.009 |
| 1439440_X_at | protein tyrosine kinase 9-like (A6-related protein)                          | Ptk9l              | -1.2  | 0.402 | -1.02 | 0.583 | 1.22  | 0.096 | 1.02  | 0.863 | 1.24 | 0.016 |
| 1432538_a_at | replication factor C (activator 1) 3                                         | Rfc3               | 4.97  | 0.204 | 6.5   | 0.028 | 1.34  | 0.099 | 1.32  | 0.025 | 1.24 | 0.015 |
| 1452399_at   | regulator of G-protein signaling 6                                           | Rgs6               | 1.11  | 0.313 | 1.22  | 0.286 | 1.1   | 0.043 | 1.12  | 0.479 | 1.24 | 0.013 |
| 1453752_at   | ribosomal protein L17                                                        | Rpl17              | -1.12 | 0.453 | 1.02  | 0.655 | 1.14  | 0.286 | 1.04  | 0.190 | 1.24 | 0.035 |
| 1448868_at   | SCAN domain-containing 1                                                     | Scand1             | -1.03 | 0.657 | 1.13  | 0.322 | 1.15  | 0.097 | 1.14  | 0.122 | 1.24 | 0.044 |
| 1451044_at   | survivor of motor neuron protein interacting protein 1                       | Sip1               | -1.11 | 0.386 | 1.06  | 0.800 | 1.03  | 0.946 | 1.15  | 0.008 | 1.24 | 0.042 |
| 1436324_at   | START domain containing 9 /// similar to StAR-related lipid transfer protein | Stard9 /// LOC668t | 1.16  | 0.935 | -1.25 | 0.434 | 1.39  | 0.164 | -1.12 | 0.049 | 1.24 | 0.038 |
| 1416345_at   | translocase of inner mitochondrial membrane 8 homolog a1 (yeast)             | Timm8a1            | 1.03  | 0.760 | 1.25  | 0.019 | 1.2   | 0.038 | 1.16  | 0.025 | 1.24 | 0.007 |
| 1454836_at   | transmembrane protein 18                                                     | Tmem18             | 1.03  | 0.718 | 1.17  | 0.156 | 1.18  | 0.136 | 1.2   | 0.026 | 1.24 | 0.009 |
| 1430045_at   | translin-associated factor X                                                 | Tsnax              | -1.13 | 0.172 | 1.01  | 0.760 | 1.44  | 0.103 | -1.09 | 0.303 | 1.24 | 0.026 |
| 1428402_at   | zinc finger, CCHC domain containing 3                                        | Zcchc3             | 1.31  | 0.591 | 1.47  | 0.318 | 1.51  | 0.501 | 1.34  | 0.309 | 1.24 | 0.022 |
| 1434085_at   | zinc finger protein 523                                                      | Zfp523             | -1.05 | 0.585 | 1.01  | 0.829 | 1.01  | 0.887 | -1.02 | 0.820 | 1.24 | 0.035 |
| 1420095_s_at | zinc finger proliferation 1                                                  | Zipro1             | -1.08 | 0.472 | 1.27  | 0.948 | 1.2   | 0.026 | 1.55  | 0.016 | 1.24 | 0.001 |
| 1433936_at   | RIKEN cDNA 0610010E21 gene                                                   | 0610010E21Rik      | 1.15  | 0.022 | 1.46  | 0.010 | 1.19  | 0.133 | 1.19  | 0.008 | 1.25 | 0.019 |
| 1455545_at   | RIKEN cDNA 1110065P20 gene                                                   | 1110065P20Rik      | 1.08  | 0.440 | 1.29  | 0.006 | 1.03  | 0.675 | 1.19  | 0.000 | 1.25 | 0.003 |
| 1428684_at   | RIKEN cDNA 1500001M20 gene                                                   | 1500001M20Rik      | 1.03  | 0.799 | -1.04 | 0.568 | 1.07  | 0.116 | 1.15  | 0.066 | 1.25 | 0.038 |
| 1442137_at   | RIKEN cDNA 2010000I03 gene                                                   | 2010000I03Rik      | 1.06  | 0.816 | 1.28  | 0.927 | 1.02  | 0.757 | 1.11  | 0.328 | 1.25 | 0.049 |
| 1441796_at   | RIKEN cDNA 2010309E21 gene                                                   | 2010309E21Rik      | -1.06 | 0.575 | 1.12  | 0.677 | 1     | 0.995 | 1     | 0.927 | 1.25 | 0.020 |
| 1428619_at   | RIKEN cDNA 2310005N03 gene                                                   | 2310005N03Rik      | -1.05 | 0.582 | 1.17  | 0.427 | 1.18  | 0.191 | 1.02  | 0.256 | 1.25 | 0.019 |
| 1452093_at   | RIKEN cDNA 2500001K11 gene                                                   | 2500001K11Rik      | 1.11  | 0.483 | 1.28  | 0.092 | 1.15  | 0.129 | 1.17  | 0.030 | 1.25 | 0.021 |
| 1460641_a_at | RIKEN cDNA 3100004P22 gene /// RIKEN cDNA 2310022K01 gene                    | 3100004P22Rik ///  | 1.21  | 0.486 | 1.3   | 0.307 | 1.03  | 0.505 | 1.04  | 0.248 | 1.25 | 0.041 |
| 1456602_at   | RIKEN cDNA 4932417116 gene                                                   | 4932417116Rik      | -1.03 | 0.779 | -1.01 | 0.780 | 1.06  | 0.677 | 1.09  | 0.382 | 1.25 | 0.001 |
| 1430701_a_at | RIKEN cDNA 5730528L13 gene                                                   | 5730528L13Rik      | 3.17  | 0.244 | 3.24  | 0.084 | 1.18  | 0.105 | 1.28  | 0.013 | 1.25 | 0.030 |
| 1423893_X_at | amyloid beta (A4) precursor protein-binding, family B, member 1              | Apbb1              | -1.05 | 0.458 | -1.08 | 0.150 | 1.18  | 0.204 | -1.05 | 0.576 | 1.25 | 0.001 |
| 1417655_a_at | arsenate resistance protein 2                                                | Ars2               | -1.11 | 0.397 | 1.14  | 0.341 | 1.31  | 0.009 | 1.24  | 0.048 | 1.25 | 0.020 |
| 1439036_a_at | ATPase, Na+/K+ transporting, beta 1 polypeptide                              | Atp1b1             | 1.32  | 0.285 | 1.52  | 0.222 | 1.17  | 0.180 | 1.09  | 0.435 | 1.25 | 0.018 |
| 1434711_at   | cDNA sequence BC030867                                                       | BC030867           | 1.07  | 0.755 | 1.2   | 0.142 | 1.2   | 0.003 | 1.19  | 0.038 | 1.25 | 0.015 |
| 1429561_at   | BRF2, subunit of RNA polymerase III transcription initiation factor, BRF1-l  | Brf2               | -1.07 | 0.448 | 1.24  | 0.642 | 1.2   | 0.039 | 1.16  | 0.023 | 1.25 | 0.004 |
| 1426165_a_at | caspase 3                                                                    | Casp3              | 2.04  | 0.430 | 2.21  | 0.230 | 1.16  | 0.354 | 1.29  | 0.121 | 1.25 | 0.042 |
| 1456085_X_at | CD151 antigen                                                                | Cd151              | -1.11 | 0.314 | 1.09  | 0.673 | 1.15  | 0.123 | 1.12  | 0.109 | 1.25 | 0.017 |
| 1419590_at   | cytochrome P450, family 2, subfamily b, polypeptide 9                        | Cyp2b9             | -1.18 | 0.283 | 1.31  | 0.695 | 1.09  | 0.954 | 1.14  | 0.681 | 1.25 | 0.036 |
| 1451641_at   | debranching enzyme homolog 1 (S. cerevisiae)                                 | Dbr1               | -1.07 | 0.528 | 1.21  | 0.873 | 1.14  | 0.103 | 1.18  | 0.024 | 1.25 | 0.015 |
| 1416751_a_at | DEAD (Asp-Glu-Ala-Asp) box polypeptide 20                                    | Ddx20              | 1.12  | 0.539 | 1.35  | 0.024 | 1.06  | 0.181 | 1.17  | 0.010 | 1.25 | 0.024 |
| 1434695_at   | denticleless homolog (Drosophila)                                            | Dtl                | 1.33  | 0.004 | 1.55  | 0.013 | 1.12  | 0.272 | 1.05  | 0.294 | 1.25 | 0.031 |
| 1424697_at   | DTW domain containing 1                                                      | Dtwd1              | 1.06  | 0.013 | 1.13  | 0.124 | 1.2   | 0.024 | 1.06  | 0.049 | 1.25 | 0.025 |
| 1437187_at   | E2F transcription factor 7                                                   | E2f7               | -1.02 | 0.730 | 1.37  | 0.145 | 1.35  | 0.022 | 1.12  | 0.238 | 1.25 | 0.036 |
| 1452639_at   | ectonucleotide pyrophosphatase/phosphodiesterase 4                           | Enpp4              | 1.19  | 0.823 | 1.47  | 0.335 | 1.05  | 0.839 | -1.02 | 0.631 | 1.25 | 0.002 |
| 1428120_at   | F-box and WD-40 domain protein 9                                             | Fbxw9              | -1.06 | 0.385 | 1.17  | 0.183 | 1.1   | 0.373 | -1.07 | 0.496 | 1.25 | 0.001 |
| 1418361_at   | growth arrest specific 8                                                     | Gas8               | 1.06  | 0.847 | 1.37  | 0.163 | 1.28  | 0.200 | -1.05 | 0.419 | 1.25 | 0.037 |
| 1416593_at   | glutaredoxin                                                                 | Glrx               | 4.58  | 0.267 | 6.04  | 0.097 | 1.1   | 0.152 | 1.27  | 0.062 | 1.25 | 0.043 |
| 1448942_at   | guanine nucleotide binding protein (G protein), gamma 11                     | Gng11              | -1.07 | 0.407 | 1.07  | 0.381 | 1.17  | 0.002 | -1.03 | 0.558 | 1.25 | 0.000 |
| 1427027_a_at | general transcription factor III A                                           | Gtf3a              | 1.32  | 0.532 | 1.38  | 0.112 | 1.08  | 0.228 | 1.14  | 0.025 | 1.25 | 0.024 |
| 1435451_at   | helicase, mus308-like (Drosophila)                                           | Hel308             | 1.18  | 0.761 | 1.24  | 0.223 | 1.19  | 0.602 | 1.2   | 0.184 | 1.25 | 0.046 |
| 1435866_s_at | histone 3, H2a                                                               | Hist3h2a           | -1.05 | 0.609 | 1.21  | 0.041 | 1.21  | 0.013 | 1.28  | 0.008 | 1.25 | 0.005 |
| 1417948_s_at | interleukin enhancer binding factor 2                                        | Ilf2               | 1.13  | 0.157 | 1.31  | 0.018 | 1.18  | 0.054 | 1.05  | 0.161 | 1.25 | 0.008 |
| 1438095_X_at | Nucleolar complex associated 4 homolog (S. cerevisiae)                       | Noc4l              | -1.16 | 0.402 | -1.03 | 0.704 | 1.04  | 0.226 | 1.21  | 0.182 | 1.25 | 0.048 |
| 1454934_at   | protein phosphatase 1F (PP2C domain containing)                              | Ppm1f              | 1.08  | 0.536 | 1.3   | 0.098 | 1.07  | 0.650 | 1.05  | 0.376 | 1.25 | 0.036 |
| 1437234_X_at | protein arginine N-methyltransferase 2                                       | Prmt2              | -1.31 | 0.301 | -1.11 | 0.461 | 1.21  | 0.054 | 1.12  | 0.004 | 1.25 | 0.018 |
| 1450639_at   | solute carrier family 28 (sodium-coupled nucleoside transporter), member     | Slc28a2 /// LOC38  | -1.29 | 0.376 | -1.25 | 0.352 | -1.28 | 0.067 | 1.03  | 0.724 | 1.25 | 0.027 |
| 1426429_at   | THAP domain containing 7                                                     | Thap7              | -1.07 | 0.377 | 1.11  | 0.841 | -1    | 0.798 | 1.48  | 0.110 | 1.25 | 0.026 |

|              |                                                                                          |                   |       |       |       |       |       |       |       |       |      |       |
|--------------|------------------------------------------------------------------------------------------|-------------------|-------|-------|-------|-------|-------|-------|-------|-------|------|-------|
| 1428634_at   | TWIST neighbor                                                                           | Twistnb           | -1.04 | 0.695 | 1.2   | 0.435 | 1.12  | 0.501 | 1.12  | 0.212 | 1.25 | 0.029 |
| 1451080_at   | ubiquitin specific peptidase 1                                                           | Usp1              | 1.38  | 0.036 | 1.7   | 0.011 | 1.28  | 0.022 | 1.17  | 0.029 | 1.25 | 0.042 |
| 1427933_at   | vacuolar protein sorting 33B (yeast)                                                     | Vps33b            | 3.28  | 0.344 | 3.82  | 0.149 | 1.24  | 0.398 | 1.19  | 0.167 | 1.25 | 0.018 |
| 1416224_at   | zinc finger and BTB domain containing 17                                                 | Zbtb17            | -1.3  | 0.234 | -1.15 | 0.391 | -1.14 | 0.208 | 1.02  | 0.778 | 1.25 | 0.033 |
| 1434022_at   | zinc finger and BTB domain containing 33                                                 | Zbtb33            | -1.01 | 0.735 | 1.16  | 0.437 | 1.26  | 0.003 | 1.29  | 0.009 | 1.25 | 0.013 |
| 1457285_at   | zinc finger protein 187                                                                  | Zfp187            | 1.33  | 0.116 | 1.58  | 0.070 | 1.2   | 0.088 | 1.2   | 0.016 | 1.25 | 0.011 |
| 1424670_s_at | zinc finger, FYVE domain containing 21                                                   | Zfyve21           | -1.02 | 0.552 | 1.09  | 0.455 | 1.13  | 0.047 | 1.23  | 0.001 | 1.25 | 0.018 |
| 1448540_a_at | RIKEN cDNA 0610012G03 gene /// hypothetical protein LOC638521                            | 0610012G03Rik /// | -1.06 | 0.577 | 1.08  | 0.985 | 1.14  | 0.186 | 1.11  | 0.031 | 1.26 | 0.044 |
| 1424106_at   | RIKEN cDNA 1200003C05 gene                                                               | 1200003C05Rik     | 1.15  | 0.065 | 1.14  | 0.104 | 1.13  | 0.104 | 1.1   | 0.170 | 1.26 | 0.041 |
| 1430846_at   | RIKEN cDNA 1700061G19 gene                                                               | 1700061G19Rik     | 1.21  | 0.472 | 1.12  | 0.921 | -1.08 | 0.489 | 1.13  | 0.962 | 1.26 | 0.017 |
| 1428202_at   | RIKEN cDNA 1810037C20 gene                                                               | 1810037C20Rik     | -1.02 | 0.701 | -1.04 | 0.647 | -1.08 | 0.144 | -1.12 | 0.079 | 1.26 | 0.032 |
| 1421498_a_at | RIKEN cDNA 2010204K13 gene                                                               | 2010204K13Rik     | -1.13 | 0.484 | -1    | 0.720 | 1.14  | 0.604 | 1.15  | 0.036 | 1.26 | 0.044 |
| 1460456_at   | RIKEN cDNA 2010316F05 gene                                                               | 2010316F05Rik     | -1.15 | 0.422 | 1.28  | 0.592 | -1    | 0.675 | 1.08  | 0.747 | 1.26 | 0.031 |
| 1452847_at   | RIKEN cDNA 2410008K03 gene                                                               | 2410008K03Rik     | -1.02 | 0.673 | -1.07 | 0.472 | 1.07  | 0.663 | 1.06  | 0.665 | 1.26 | 0.017 |
| 1453314_x_at | RIKEN cDNA 2610039C10 gene                                                               | 2610039C10Rik     | -1.14 | 0.408 | 1.09  | 0.997 | 1.16  | 0.482 | 1.07  | 0.287 | 1.26 | 0.021 |
| 1439901_at   | RIKEN cDNA 2610208M17 gene                                                               | 2610208M17Rik     | -1.12 | 0.462 | -1.17 | 0.427 | 1.12  | 0.050 | -1.01 | 0.776 | 1.26 | 0.016 |
| 1438321_x_at | RIKEN cDNA 4930504E06 gene                                                               | 4930504E06Rik     | -1.15 | 0.405 | 1.02  | 0.689 | 1.18  | 0.038 | 1.1   | 0.150 | 1.26 | 0.027 |
| 1428821_at   | 1-acylglycerol-3-phosphate O-acyltransferase 2 (lysophosphatidic acid acyltransferase 2) | Agpat2            | 1.51  | 0.249 | 1.8   | 0.047 | 1.21  | 0.012 | 1.18  | 0.042 | 1.26 | 0.006 |
| 1424322_at   | apurinic/apyrimidinic endonuclease 2                                                     | Apex2             | 2.25  | 0.463 | 2.89  | 0.070 | -1.24 | 0.128 | 1.03  | 0.874 | 1.26 | 0.042 |
| 1424513_at   | ATPase, H+ transporting, lysosomal V0 subunit A2                                         | Atp6v0a2          | 1.28  | 0.897 | 1.36  | 0.096 | -1.01 | 0.786 | 1.04  | 0.425 | 1.26 | 0.011 |
| 1416250_at   | B-cell translocation gene 2, anti-proliferative                                          | Btg2              | 1.54  | 0.167 | 2.46  | 0.018 | 1.32  | 0.271 | 1.18  | 0.137 | 1.26 | 0.002 |
| 1434529_x_at | checkpoint with forkhead and ring finger domains                                         | Chfr              | -1.23 | 0.379 | -1.13 | 0.450 | 1.13  | 0.383 | 1.02  | 0.527 | 1.26 | 0.030 |
| 1435863_at   | COMM domain containing 6                                                                 | Comm6             | 1.44  | 0.059 | 1.63  | 0.012 | 1.12  | 0.038 | 1.2   | 0.044 | 1.26 | 0.012 |
| 1419872_at   | colony stimulating factor 1 receptor                                                     | Csf1r             | -1.15 | 0.307 | -1.29 | 0.161 | 1.13  | 0.377 | 1.05  | 0.931 | 1.26 | 0.038 |
| 1456891_at   | DENN/MADD domain containing 2C                                                           | Dennd2c           | 1.56  | 0.475 | 2.04  | 0.021 | 1.04  | 0.921 | 1.09  | 0.374 | 1.26 | 0.023 |
| 1434027_at   | Down syndrome critical region gene 1-like 2                                              | Dscr1l2           | 1.1   | 0.354 | -1.01 | 0.798 | 1.44  | 0.037 | 1.19  | 0.006 | 1.26 | 0.027 |
| 1452681_at   | deoxythymidylate kinase                                                                  | Dtymk             | 1.14  | 0.009 | 1.29  | 0.018 | 1.17  | 0.088 | 1.18  | 0.005 | 1.26 | 0.016 |
| 1418649_at   | EGL nine homolog 3 (C. elegans)                                                          | Egln3             | -1.04 | 0.642 | -1.03 | 0.754 | 1.09  | 0.822 | -1.05 | 0.275 | 1.26 | 0.005 |
| 1450898_at   | hippocampus abundant gene transcript 1                                                   | Hiat1             | 1.26  | 0.630 | 1.4   | 0.449 | 1.12  | 0.223 | 1.1   | 0.160 | 1.26 | 0.034 |
| 1423068_at   | intraflagellar transport 172 homolog (Chlamydomonas)                                     | Ifit172           | 1.41  | 0.622 | -1.05 | 0.410 | -1.07 | 0.271 | 1.28  | 0.077 | 1.26 | 0.013 |
| 1456846_at   | similar to RP58 protein                                                                  | LOC382639         | 1.09  | 0.570 | 1.11  | 0.619 | 1.32  | 0.225 | 1.18  | 0.121 | 1.26 | 0.040 |
| 1442818_at   | hypothetical protein LOC671796 /// hypothetical protein LOC675117                        | LOC671796 /// LOI | -1.03 | 0.915 | 1.14  | 0.922 | 1.48  | 0.306 | 1.15  | 0.902 | 1.26 | 0.005 |
| 1438563_s_at | mitochondrial ribosomal protein S24                                                      | Mrps24            | -1.18 | 0.412 | -1    | 0.559 | 1.1   | 0.470 | 1.04  | 0.507 | 1.26 | 0.035 |
| 1416914_s_at | mammary tumor virus receptor 2                                                           | Mtvr2             | 1.76  | 0.506 | 1.95  | 0.184 | 1.14  | 0.027 | 1.12  | 0.402 | 1.26 | 0.029 |
| 1432187_at   | nucleoporin 43                                                                           | Nup43             | -1.11 | 0.480 | 1.05  | 0.836 | 1.11  | 0.168 | 1.06  | 0.634 | 1.26 | 0.004 |
| 1424081_at   | polycomb group ring finger 6                                                             | Pcgf6             | 1.21  | 0.147 | 1.48  | 0.009 | 1.16  | 0.049 | 1.2   | 0.002 | 1.26 | 0.048 |
| 1447864_s_at | pogo transposable element with KRAB domain                                               | Pogk              | -1.16 | 0.422 | 1.24  | 0.845 | 1.11  | 0.010 | 1.28  | 0.010 | 1.26 | 0.016 |
| 1448315_a_at | pyrroline-5-carboxylate reductase family, member 2                                       | Pycr2             | -1.12 | 0.446 | 1.07  | 0.711 | 1.1   | 0.120 | 1.07  | 0.432 | 1.26 | 0.038 |
| 1452736_at   | R3H domain and coiled-coil containing 1                                                  | R3hcc1            | 1.95  | 0.295 | 2.37  | 0.052 | 1.21  | 0.054 | 1.3   | 0.003 | 1.26 | 0.029 |
| 1434427_a_at | ring finger protein 157                                                                  | Rnf157            | -1.27 | 0.267 | 1.01  | 0.548 | 1.13  | 0.378 | 1.09  | 0.278 | 1.26 | 0.029 |
| 1417811_at   | solute carrier family 24 (sodium/potassium/calcium exchanger), member 6                  | Slc24a6           | 1.01  | 0.500 | 1.21  | 0.822 | 1.07  | 0.966 | -1.15 | 0.098 | 1.26 | 0.002 |
| 1438426_at   | transmembrane protein 58                                                                 | Tmem58            | -1.11 | 0.497 | 1.05  | 0.853 | 1.21  | 0.087 | 1.09  | 0.041 | 1.26 | 0.010 |
| 1454861_at   | taxilin alpha                                                                            | Txlna             | 1.01  | 0.906 | 1.32  | 0.068 | 1.18  | 0.089 | 1.2   | 0.006 | 1.26 | 0.004 |
| 1442192_at   | thymidylate synthase                                                                     | Tyms              | 1.19  | 0.977 | 1.26  | 0.970 | -1    | 0.887 | 1.09  | 0.929 | 1.26 | 0.042 |
| 1453039_at   | zinc finger protein 335                                                                  | Zfp335            | -1.13 | 0.380 | 1.03  | 0.932 | 1.02  | 0.981 | 1.06  | 0.379 | 1.26 | 0.021 |
| 1418033_s_at | zinc finger protein 535                                                                  | Zfp535            | -1.03 | 0.780 | 1.2   | 0.137 | 1.3   | 0.182 | 1.19  | 0.274 | 1.26 | 0.034 |
| 1447403_a_at | Zinc finger, MYND domain containing 19                                                   | Zmynd19           | -1.1  | 0.476 | 1.31  | 0.040 | 1.12  | 0.443 | 1.35  | 0.015 | 1.26 | 0.034 |
| 1436747_at   | RIKEN cDNA 1110014K08 gene /// hypothetical protein LOC664786 /// hyr                    | 1110014K08Rik /// | 1     | 0.953 | -1.05 | 0.144 | 1.06  | 0.462 | 1.06  | 0.234 | 1.27 | 0.037 |
| 1436796_at   | RIKEN cDNA 1110061A14 gene                                                               | 1110061A14Rik     | -1.01 | 0.774 | 1.22  | 0.333 | 1.16  | 0.060 | 1.47  | 0.020 | 1.27 | 0.011 |
| 1453822_at   | RIKEN cDNA 1700010H15 gene                                                               | 1700010H15Rik     | 1.1   | 0.806 | -1.26 | 0.142 | -1.29 | 0.349 | 1.28  | 0.273 | 1.27 | 0.036 |
| 1437110_at   | RIKEN cDNA 2810474O19 gene                                                               | 2810474O19Rik     | 1.07  | 0.362 | 1.4   | 0.166 | -1.05 | 0.593 | 1.31  | 0.014 | 1.27 | 0.034 |
| 1417479_at   | RIKEN cDNA 4930511A21 gene                                                               | 4930511A21Rik     | 3.38  | 0.288 | 2.52  | 0.032 | 1.34  | 0.127 | 1.14  | 0.456 | 1.27 | 0.042 |
| 1457939_at   | RIKEN cDNA 4930578N16 gene                                                               | 4930578N16Rik     | 1.07  | 0.582 | 1.46  | 0.889 | -1.02 | 0.606 | -1.28 | 0.149 | 1.27 | 0.046 |
| 1429364_at   | RIKEN cDNA 4930579G24 gene                                                               | 4930579G24Rik     | 1.01  | 0.767 | 1.21  | 0.021 | 1.4   | 0.037 | 1.27  | 0.036 | 1.27 | 0.003 |
| 1443344_at   | RIKEN cDNA 4932409I22 gene                                                               | 4932409I22Rik     | -1.19 | 0.298 | 1.6   | 0.430 | 1.16  | 0.279 | -1.18 | 0.501 | 1.27 | 0.029 |
| 1441779_at   | RIKEN cDNA 9530006C21 gene                                                               | 9530006C21Rik     | 1.04  | 0.919 | 1.21  | 0.884 | 1.13  | 0.402 | 1.17  | 0.417 | 1.27 | 0.024 |
| 1438036_x_at | expressed sequence AW061290                                                              | AW061290          | -1.5  | 0.306 | -1.46 | 0.262 | -1.06 | 0.220 | -1.08 | 0.572 | 1.27 | 0.003 |
| 1440831_at   | BTB and CNC homology 1                                                                   | Bach1             | -1.05 | 0.574 | 1.13  | 0.939 | 1.23  | 0.042 | 1.12  | 0.099 | 1.27 | 0.014 |

|              |                                                                                  |                   |       |       |       |       |       |       |       |       |      |       |
|--------------|----------------------------------------------------------------------------------|-------------------|-------|-------|-------|-------|-------|-------|-------|-------|------|-------|
| 1431079_at   | C1q and tumor necrosis factor related protein 2                                  | C1qtnf2           | 1.19  | 0.401 | 1.13  | 0.692 | -1.07 | 0.242 | 1.02  | 0.796 | 1.27 | 0.025 |
| 1424475_at   | calcium/calmodulin-dependent protein kinase kinase 2, beta                       | Camkk2            | -1.14 | 0.293 | 1.01  | 0.949 | 1.02  | 0.937 | 1.14  | 0.377 | 1.27 | 0.005 |
| 1424529_s_at | cell growth regulator with EF hand domain 1                                      | Cgref1            | -1.23 | 0.223 | 1.18  | 0.672 | 1.13  | 0.079 | 1.16  | 0.011 | 1.27 | 0.048 |
| 1448657_a_at | DnaJ (Hsp40) homolog, subfamily B, member 10                                     | Dnajb10           | -1.07 | 0.425 | 1.1   | 0.788 | 1.17  | 0.144 | 1.03  | 0.840 | 1.27 | 0.043 |
| 1431422_a_at | dual specificity phosphatase 14                                                  | Dusp14            | 1.88  | 0.299 | 2.21  | 0.031 | 1.32  | 0.019 | 1.37  | 0.006 | 1.27 | 0.039 |
| 1431190_x_at | fumarylacetoacetate hydrolase domain containing 2A                               | Fahd2a            | -1.07 | 0.545 | -1.04 | 0.537 | -1.04 | 0.606 | -1.04 | 0.449 | 1.27 | 0.002 |
| 1421731_a_at | flap structure specific endonuclease 1                                           | Fen1              | 1.18  | 0.546 | 1.56  | 0.001 | 1.28  | 0.003 | 1.25  | 0.030 | 1.27 | 0.001 |
| 1429942_at   | glucocorticoid modulatory element binding protein 1                              | Gmeb1             | 1.17  | 0.869 | 1.1   | 0.953 | 1.28  | 0.063 | -1.02 | 0.738 | 1.27 | 0.043 |
| 1419462_s_at | gene trap locus 3                                                                | Gtl3              | 1.08  | 0.213 | 1.26  | 0.120 | 1.19  | 0.121 | 1.14  | 0.029 | 1.27 | 0.020 |
| 1450746_at   | kelch-like ECH-associated protein 1                                              | Keap1             | -1.14 | 0.383 | -1.05 | 0.555 | 1.09  | 0.155 | 1.06  | 0.482 | 1.27 | 0.027 |
| 1448758_at   | similar to nuclear receptor binding factor 2 /// similar to nuclear receptor bir | LOC627232 /// LOI | -1.08 | 0.155 | -1.01 | 0.823 | 1.04  | 0.869 | 1.05  | 0.000 | 1.27 | 0.008 |
| 1417931_at   | N-deacetylase/N-sulfotransferase (heparan glucosaminy) 2                         | Ndst2             | 1.34  | 0.412 | 1.38  | 0.459 | 1.14  | 0.323 | 1.09  | 0.119 | 1.27 | 0.023 |
| 1418289_at   | nestin                                                                           | Nes               | -1.25 | 0.373 | -1.2  | 0.449 | -1.11 | 0.570 | -1.12 | 0.147 | 1.27 | 0.007 |
| 1417166_at   | PC4 and SFRS1 interacting protein 1                                              | Psip1             | 1.04  | 0.933 | 1.06  | 0.731 | 1.23  | 0.014 | 1.26  | 0.035 | 1.27 | 0.027 |
| 1418666_at   | pentraxin related gene                                                           | Ptx3              | -1.23 | 0.052 | 1.18  | 0.362 | -1.04 | 0.972 | 1.29  | 0.181 | 1.27 | 0.026 |
| 1437742_at   | RAB21, member RAS oncogene family                                                | Rab21             | -1.06 | 0.258 | 1.21  | 0.136 | 1.13  | 0.334 | 1.09  | 0.754 | 1.27 | 0.005 |
| 1431090_at   | Ssu72 RNA polymerase II CTD phosphatase homolog (yeast)                          | Ssu72             | 1.21  | 0.710 | 1.12  | 0.370 | -1.34 | 0.198 | -1.07 | 0.510 | 1.27 | 0.033 |
| 1429590_at   | transforming, acidic coiled-coil containing protein 1                            | Tacc1             | 1.12  | 0.442 | 1.18  | 0.428 | 1.35  | 0.569 | -1.07 | 0.311 | 1.27 | 0.031 |
| 1458244_at   | transmembrane and coiled-coil domains 5                                          | Tmco5             | -1.05 | 0.879 | -1.45 | 0.090 | -1.87 | 0.082 | -1.18 | 0.094 | 1.27 | 0.019 |
| 1424990_at   | transmembrane protein 142A                                                       | Tmem142a          | 1.04  | 0.627 | 1.06  | 0.442 | 1.15  | 0.108 | 1.09  | 0.052 | 1.27 | 0.025 |
| 1451321_a_at | RIKEN cDNA 0610033105 gene                                                       | 0610033105Rik     | -1.07 | 0.482 | 1.64  | 0.066 | 1.34  | 0.009 | 1.07  | 0.148 | 1.28 | 0.040 |
| 1429259_a_at | RIKEN cDNA 1810014B01 gene                                                       | 1810014B01Rik     | -1.07 | 0.531 | -1.07 | 0.528 | 1.07  | 0.575 | 1.05  | 0.361 | 1.28 | 0.048 |
| 1455529_at   | RIKEN cDNA 2700083E18 gene                                                       | 2700083E18Rik     | 1.04  | 0.254 | 1.28  | 0.015 | 1.08  | 0.082 | 1.15  | 0.004 | 1.28 | 0.013 |
| 1441086_at   | RIKEN cDNA 4930451111 gene                                                       | 4930451111Rik     | 1.93  | 0.066 | 2.56  | 0.234 | 1.92  | 0.422 | -1.96 | 0.084 | 1.28 | 0.009 |
| 1429955_at   | RIKEN cDNA 5031434011 gene                                                       | 5031434011Rik     | -1.13 | 0.472 | -1.05 | 0.426 | 1.15  | 0.780 | -1.14 | 0.467 | 1.28 | 0.016 |
| 1423072_at   | RIKEN cDNA 6720475J19 gene /// similar to putative retrovirus-related ga         | 6720475J19Rik /// | -1.05 | 0.636 | 1.11  | 0.443 | 1.09  | 0.684 | 1.23  | 0.029 | 1.28 | 0.027 |
| 1443175_at   | RIKEN cDNA A830010M09 gene                                                       | A830010M09Rik     | 1.11  | 0.790 | 1.39  | 0.956 | -1.53 | 0.111 | 2.8   | 0.581 | 1.28 | 0.027 |
| 1436099_at   | expressed sequence A1836003                                                      | A1836003          | 1.07  | 0.686 | 1.31  | 0.411 | 1.35  | 0.078 | 1.39  | 0.236 | 1.28 | 0.033 |
| 1434045_at   | cyclin-dependent kinase inhibitor 1B                                             | Cdkn1b            | -1.12 | 0.410 | -1.35 | 0.154 | 1.16  | 0.316 | -1.04 | 0.881 | 1.28 | 0.019 |
| 1427183_at   | epidermal growth factor-containing fibulin-like extracellular matrix protein 1   | Efemp1            | 1.1   | 0.726 | 1.29  | 0.958 | 1.41  | 0.283 | -1.1  | 0.307 | 1.28 | 0.007 |
| 1452085_at   | GATA zinc finger domain containing 1                                             | Gatad1            | 1.07  | 0.456 | 1.2   | 0.131 | 1.13  | 0.674 | 1.01  | 0.905 | 1.28 | 0.031 |
| 1441894_s_at | GRP1 (general receptor for phosphoinositides 1)-associated scaffold prote        | Grasp             | -1.19 | 0.391 | -1    | 0.573 | 1.24  | 0.021 | 1.34  | 0.002 | 1.28 | 0.007 |
| 1428985_at   | integrator complex subunit 12                                                    | Ints12            | 1.2   | 0.026 | 1.36  | 0.029 | 1.29  | 0.80  | 1.2   | 0.218 | 1.28 | 0.027 |
| 1421903_at   | intersex-like (Drosophila)                                                       | Isl               | 1.3   | 0.143 | 1.31  | 0.046 | -1    | 0.950 | 1.1   | 0.417 | 1.28 | 0.041 |
| 1436915_x_at | lysosomal-associated protein transmembrane 4B                                    | Laptm4b           | -1.29 | 0.314 | -1.22 | 0.358 | 1.21  | 0.346 | -1.07 | 0.184 | 1.28 | 0.031 |
| 1416503_at   | lathexin                                                                         | Lxn               | 1.12  | 0.056 | 1.31  | 0.015 | 1.14  | 0.197 | 1.16  | 0.043 | 1.28 | 0.014 |
| 1422431_at   | melanoma antigen, family E, 1                                                    | Magee1            | 1.29  | 0.484 | 1.65  | 0.052 | 1.24  | 0.074 | 1.04  | 0.314 | 1.28 | 0.000 |
| 1416671_a_at | mucollipin 1                                                                     | Mcoln1            | 2.53  | 0.328 | 2.74  | 0.246 | 1.07  | 0.073 | 1.02  | 0.766 | 1.28 | 0.037 |
| 1450458_at   | nuclear receptor coactivator 2                                                   | Ncoa2             | -1.21 | 0.436 | -1.53 | 0.063 | -1.15 | 0.372 | 1.4   | 0.599 | 1.28 | 0.037 |
| 1428277_at   | OTU domain containing 6B                                                         | Otud6b            | 1.19  | 0.044 | 1.36  | 0.032 | 1.02  | 0.989 | 1.08  | 0.432 | 1.28 | 0.040 |
| 1441967_at   | Parkinson disease 7 domain containing 1                                          | Pddc1             | 1.3   | 0.531 | 1.27  | 0.446 | 1.31  | 0.264 | 1.08  | 0.640 | 1.28 | 0.012 |
| 1436198_at   | prolyl endopeptidase                                                             | Prep              | -1.21 | 0.156 | 1.15  | 0.485 | 1.54  | 0.266 | 1.15  | 0.582 | 1.28 | 0.011 |
| 1433533_x_at | protein kinase, AMP-activated, gamma 1 non-catalytic subunit                     | Prkag1            | -1.38 | 0.202 | -1.15 | 0.391 | -1.03 | 0.404 | 1.06  | 0.458 | 1.28 | 0.020 |
| 1417035_at   | SAC3 domain containing 1                                                         | Sac3d1            | 1.04  | 0.715 | 1.36  | 0.026 | 1.23  | 0.034 | 1.23  | 0.023 | 1.28 | 0.048 |
| 1434291_a_at | small EDRK-rich factor 1                                                         | Serf1             | -1.22 | 0.332 | -1.03 | 0.689 | 1.21  | 0.693 | -1.11 | 0.112 | 1.28 | 0.014 |
| 1415802_at   | solute carrier family 16 (monocarboxylic acid transporters), member 1            | Slc16a1           | 1.16  | 0.411 | 1.35  | 0.023 | 1.17  | 0.009 | 1.19  | 0.001 | 1.28 | 0.010 |
| 1439369_x_at | solute carrier family 9 (sodium/hydrogen exchanger), isoform 3 regulator 2       | Slc9a3r2          | -1.13 | 0.475 | -1.07 | 0.641 | 1.02  | 0.737 | 1.12  | 0.620 | 1.28 | 0.014 |
| 1457680_a_at | transmembrane protein 69                                                         | Tmem69            | 1.06  | 0.898 | 1.19  | 0.682 | 1.08  | 0.001 | 1.01  | 0.833 | 1.28 | 0.024 |
| 1427593_at   | tripartite motif protein 8                                                       | Trim8             | 1.32  | 0.749 | 1.1   | 0.667 | 2.77  | 0.281 | 1.14  | 0.811 | 1.28 | 0.016 |
| 1421050_at   | vacuolar protein sorting 25 (yeast)                                              | Vps25             | -1.07 | 0.501 | 1.25  | 0.927 | 1.15  | 0.292 | -1.17 | 0.218 | 1.28 | 0.037 |
| 1451244_a_at | zinc finger protein 422                                                          | Zfp422            | 1.15  | 0.006 | 1.32  | 0.020 | 1.18  | 0.114 | 1.04  | 0.258 | 1.28 | 0.007 |
| 1435202_at   | zinc finger protein 574                                                          | Zfp574            | 1.05  | 0.865 | 1.21  | 0.617 | 1.35  | 0.083 | 1.21  | 0.039 | 1.28 | 0.049 |
| 1429541_at   | RIKEN cDNA 2500002G23 gene                                                       | 2500002G23Rik     | -1.19 | 0.005 | 1.31  | 0.181 | 1.37  | 0.228 | -1.11 | 0.465 | 1.29 | 0.021 |
| 1438982_s_at | RIKEN cDNA 2810417J12 gene                                                       | 2810417J12Rik     | -1.59 | 0.254 | -1.39 | 0.345 | 1.88  | 0.163 | 1.11  | 0.844 | 1.29 | 0.025 |
| 1444450_at   | RIKEN cDNA 9530096D07 gene                                                       | 9530096D07Rik     | 1.22  | 0.541 | 1.01  | 0.686 | 1.59  | 0.623 | -1.12 | 0.371 | 1.29 | 0.020 |
| 1427959_at   | abhydrolase domain containing 10                                                 | Abhd10            | 1.04  | 0.551 | 1.38  | 0.026 | 1.27  | 0.027 | 1.25  | 0.029 | 1.29 | 0.029 |
| 1435498_at   | ADP-ribosylation factor interacting protein 2                                    | Arfp2             | 1.03  | 0.733 | 1.18  | 0.064 | 1.19  | 0.035 | 1.27  | 0.091 | 1.29 | 0.005 |
| 1454814_s_at | expressed sequence AU021838                                                      | AU021838          | 1.26  | 0.123 | 1.58  | 0.015 | 1.17  | 0.023 | 1.28  | 0.052 | 1.29 | 0.007 |

|              |                                                                       |               |       |       |       |       |       |       |       |       |      |       |
|--------------|-----------------------------------------------------------------------|---------------|-------|-------|-------|-------|-------|-------|-------|-------|------|-------|
| 1451246_s_at | aurora kinase B                                                       | Aurkb         | 1.11  | 0.005 | 1.36  | 0.019 | 1.18  | 0.041 | 1.2   | 0.005 | 1.29 | 0.028 |
| 1435454_a_at | cDNA sequence BC006779                                                | BC006779      | -1.1  | 0.378 | 1.11  | 0.622 | 1.21  | 0.211 | 1.14  | 0.177 | 1.29 | 0.000 |
| 1452216_at   | cDNA sequence BC025519                                                | BC025519      | 1.07  | 0.485 | 1.11  | 0.276 | 1.11  | 0.422 | 1.23  | 0.081 | 1.29 | 0.021 |
| 1415975_at   | calcium regulated heat stable protein 1                               | Carhsp1       | 1.61  | 0.152 | 1.91  | 0.034 | 1.22  | 0.024 | 1.17  | 0.056 | 1.29 | 0.008 |
| 1424638_at   | cyclin-dependent kinase inhibitor 1A (P21)                            | Cdkn1a        | 1.16  | 0.333 | 1.69  | 0.005 | 1.25  | 0.005 | 1.21  | 0.002 | 1.29 | 0.003 |
| 1454640_at   | coiled-coil-helix-coiled-coil-helix domain containing 7               | Chchd7        | -1.02 | 0.649 | -1.04 | 0.656 | 1.2   | 0.142 | 1.19  | 0.131 | 1.29 | 0.038 |
| 1415948_at   | cellular repressor of E1A-stimulated genes 1                          | Creg1         | 1.12  | 0.264 | 1.17  | 0.053 | 1.06  | 0.875 | 1.27  | 0.208 | 1.29 | 0.005 |
| 1417583_a_at | charged amino acid rich leucine zipper 1                              | Crلز1         | 1     | 0.712 | 1.51  | 0.086 | 1.04  | 0.879 | 1.11  | 0.520 | 1.29 | 0.034 |
| 1436126_at   | dynein, axonemal, light intermediate polypeptide 1                    | Dnali1        | -1.18 | 0.226 | -1.16 | 0.113 | -1.07 | 0.267 | -1.04 | 0.561 | 1.29 | 0.032 |
| 1435926_at   | RIKEN cDNA E030003F13 gene                                            | E030003F13Rik | -1.03 | 0.574 | 1.4   | 0.017 | 1.23  | 0.022 | 1.27  | 0.028 | 1.29 | 0.047 |
| 1454963_at   | RIKEN cDNA E430028B21 gene                                            | E430028B21Rik | 1.17  | 0.113 | 1.5   | 0.005 | 1.2   | 0.060 | 1.16  | 0.012 | 1.29 | 0.027 |
| 1434263_at   | RIKEN cDNA F630110N24 gene                                            | F630110N24Rik | -1.11 | 0.425 | -1.09 | 0.518 | -1.11 | 0.350 | 1.01  | 0.909 | 1.29 | 0.035 |
| 1458753_at   | gene model 941, (NCBI)                                                | Gm941         | 1.04  | 0.560 | 1.09  | 0.599 | 1.1   | 0.996 | 1.49  | 0.075 | 1.29 | 0.021 |
| 1455324_at   | hypothetical LOC433022                                                | LOC433022     | -1.06 | 0.519 | 1.1   | 0.944 | 1.17  | 0.007 | 1.25  | 0.025 | 1.29 | 0.013 |
| 1460441_at   | similar to Zinc finger X-linked protein ZXDB                          | LOC668166     | -1.12 | 0.354 | 1.09  | 0.944 | 1.22  | 0.070 | 1.02  | 0.751 | 1.29 | 0.033 |
| 1415922_s_at | MARCKS-like 1                                                         | Marcks1       | 1.24  | 0.395 | 1.56  | 0.153 | 1.17  | 0.112 | 1.14  | 0.008 | 1.29 | 0.012 |
| 1428608_at   | myosin light chain, regulatory B                                      | Mylc2b        | 1.04  | 0.566 | 1.36  | 0.015 | 1.15  | 0.117 | 1.14  | 0.119 | 1.29 | 0.004 |
| 1423711_at   | NADH dehydrogenase (ubiquinone) 1 alpha subcomplex, assembly factor   | Ndufaf1       | 1.4   | 0.318 | 1.77  | 0.017 | 1.19  | 0.003 | 1.23  | 0.020 | 1.29 | 0.019 |
| 1428951_at   | nucleolar protein 8                                                   | Nol8          | -1.02 | 0.720 | 1.16  | 0.601 | 1.11  | 0.520 | 1.05  | 0.812 | 1.29 | 0.014 |
| 1423534_at   | programmed cell death 2                                               | Pdcd2         | -1.06 | 0.325 | 1.2   | 0.252 | 1.15  | 0.265 | 1.26  | 0.005 | 1.29 | 0.002 |
| 1451210_at   | phosphatidic acid phosphatase type 2c                                 | Ppap2c        | -1.12 | 0.220 | -1.01 | 0.824 | 1.1   | 0.264 | 1.15  | 0.100 | 1.29 | 0.043 |
| 1449092_at   | protein phosphatase 1D magnesium-dependent, delta isoform             | Ppm1d         | -1.03 | 0.558 | 1.5   | 0.007 | 1.16  | 0.026 | 1.23  | 0.015 | 1.29 | 0.024 |
| 1455002_at   | protein tyrosine phosphatase 4a1                                      | Ptp4a1        | 1.06  | 0.052 | 1.38  | 0.047 | 1.21  | 0.058 | 1.37  | 0.010 | 1.29 | 0.002 |
| 1437052_s_at | solute carrier family 2 (facilitated glucose transporter), member 3   | Slc2a3        | -1.03 | 0.686 | -1    | 0.594 | 1.26  | 0.090 | 1.28  | 0.016 | 1.29 | 0.020 |
| 1417725_a_at | Sjogren's syndrome/scleroderma autoantigen 1 homolog (human)          | Sssca1        | -1.18 | 0.414 | -1.02 | 0.531 | 1.19  | 0.444 | 1.05  | 0.230 | 1.29 | 0.006 |
| 1418370_at   | troponin C, cardiac/slow skeletal                                     | Tnnc1         | -1.16 | 0.430 | 1.1   | 0.817 | 1.25  | 0.229 | 1.07  | 0.260 | 1.29 | 0.034 |
| 1459618_at   | Three prime repair exonuclease 1                                      | Trex1         | 1.85  | 0.451 | 1.93  | 0.080 | 1.14  | 0.579 | -1.09 | 0.427 | 1.29 | 0.027 |
| 1436533_at   | TROVE domain family, member 2                                         | Trove2        | 1.18  | 0.172 | 1.02  | 0.999 | 1.15  | 0.341 | 1.12  | 0.108 | 1.29 | 0.032 |
| 1437414_at   | zinc finger protein 217                                               | Zfp217        | 1.06  | 0.126 | 1.22  | 0.005 | 1.01  | 0.888 | 1.17  | 0.006 | 1.29 | 0.005 |
| 1416651_at   | zinc finger, HIT domain containing 2                                  | Znhit2        | -1.03 | 0.683 | 1.14  | 0.126 | 1.07  | 0.389 | 1.1   | 0.067 | 1.29 | 0.030 |
| 1435333_at   | RIKEN cDNA 1110007M04 gene                                            | 1110007M04Rik | 1.12  | 0.087 | 1.39  | 0.101 | 1.27  | 0.005 | 1.41  | 0.027 | 1.3  | 0.015 |
| 1432290_at   | RIKEN cDNA 1700040G22 gene                                            | 1700040G22Rik | 1.34  | 0.834 | 1.95  | 0.463 | 1.82  | 0.628 | -1.4  | 0.165 | 1.3  | 0.022 |
| 1434321_at   | RIKEN cDNA 6620401K05 gene                                            | 6620401K05Rik | 1.47  | 0.754 | 1.98  | 0.105 | 1.14  | 0.847 | 1.12  | 0.166 | 1.3  | 0.044 |
| 1439859_at   | RIKEN cDNA 9630033F20 gene                                            | 9630033F20Rik | -1.21 | 0.385 | -1.03 | 0.520 | 1.08  | 0.553 | 1.21  | 0.112 | 1.3  | 0.033 |
| 1419113_at   | adaptor protein complex AP-1, gamma 2 subunit                         | Ap1g2         | -1.2  | 0.358 | -1.11 | 0.478 | -1.07 | 0.559 | 1.16  | 0.437 | 1.3  | 0.037 |
| 1422168_a_at | brain derived neurotrophic factor                                     | Bdnf          | 1.23  | 0.273 | 1.56  | 0.011 | 1.1   | 0.089 | 1.18  | 0.033 | 1.3  | 0.043 |
| 1428490_at   | core 1 UDP-galactose:N-acetylglactosamine-alpha-R beta 1,3-galactosyl | C1galt1       | 1.14  | 0.264 | 1.17  | 0.174 | 1.2   | 0.049 | 1.17  | 0.284 | 1.3  | 0.049 |
| 1436352_at   | centrosomal protein 78                                                | Cep78         | -1    | 0.799 | 1.03  | 0.874 | 1.32  | 0.050 | 1     | 0.946 | 1.3  | 0.022 |
| 1457846_at   | COX11 homolog, cytochrome c oxidase assembly protein (yeast)          | Cox11         | -1.07 | 0.620 | 1.41  | 0.387 | -1.04 | 0.694 | 1.59  | 0.455 | 1.3  | 0.019 |
| 1454648_s_at | DNA segment, Chr 10, Wayne State University 102, expressed            | D10Wsu102e    | 1.35  | 0.463 | 1.72  | 0.014 | 1.18  | 0.012 | 1.38  | 0.006 | 1.3  | 0.026 |
| 1452805_at   | DNA segment, Chr 11, Wayne State University 47, expressed             | D11Wsu47e     | -1.06 | 0.542 | 1.12  | 0.978 | 1.21  | 0.105 | 1.12  | 0.401 | 1.3  | 0.045 |
| 1439772_at   | DNA segment, Chr 1, Brigham & Women's Genetics 0212 expressed         | D1Bwg0212e    | 1.03  | 0.790 | 1.49  | 0.129 | 1.07  | 0.681 | 1.14  | 0.242 | 1.3  | 0.033 |
| 1418321_at   | dodecenoyl-Coenzyme A delta isomerase (3,2 trans-enoyl-Coenzyme A iso | Dci           | -1.05 | 0.496 | 1.04  | 0.977 | 1.03  | 0.621 | 1.06  | 0.074 | 1.3  | 0.010 |
| 1429093_at   | DNA-damage inducible protein 2                                        | Ddi2          | -1.08 | 0.555 | 1.02  | 0.907 | -1.03 | 0.845 | 1.02  | 0.829 | 1.3  | 0.006 |
| 1429499_at   | F-box only protein 5                                                  | Fbxo5         | -1.02 | 0.801 | 1.21  | 0.433 | 1.13  | 0.163 | 1.36  | 0.077 | 1.3  | 0.029 |
| 1427416_x_at | similar to dual specificity phosphatase 7                             | LOC674944     | 1.12  | 0.335 | 1.27  | 0.053 | 1.19  | 0.067 | 1.17  | 0.102 | 1.3  | 0.016 |
| 1459842_x_at | nucleotide binding protein 2                                          | Nubp2         | -1.23 | 0.273 | 1.05  | 0.844 | 1.12  | 0.478 | -1.04 | 0.575 | 1.3  | 0.039 |
| 1428339_at   | nudix (nucleoside diphosphate linked moiety X)-type motif 21          | Nudt21        | 1.3   | 0.259 | 1.38  | 0.091 | 1.35  | 0.003 | 1.27  | 0.003 | 1.3  | 0.007 |
| 1449162_at   | processing of precursor 7, ribonuclease P family, (S. cerevisiae)     | Pop7          | 1.21  | 0.208 | 1.4   | 0.014 | 1.17  | 0.119 | 1.11  | 0.043 | 1.3  | 0.017 |
| 1451538_at   | SRY-box containing gene 9                                             | Sox9          | 1.48  | 0.373 | 1.04  | 0.915 | 1.29  | 0.276 | -1.03 | 0.237 | 1.3  | 0.041 |
| 1451935_a_at | serine protease inhibitor, Kunitz type 2                              | Spint2        | 1.2   | 0.613 | 1.19  | 0.877 | 1.14  | 0.194 | 1.03  | 0.778 | 1.3  | 0.008 |
| 1441917_s_at | transmembrane protein 40                                              | Tmem40        | 1.16  | 0.856 | 1.18  | 0.803 | 1.12  | 0.366 | -1.22 | 0.095 | 1.3  | 0.030 |
| 1456724_x_at | WD repeat domain 79                                                   | Wdr79         | -1.23 | 0.396 | -1.11 | 0.453 | 1.09  | 0.697 | -1.02 | 0.800 | 1.3  | 0.028 |
| 1420012_at   | X-box binding protein 1                                               | Xbp1          | -1.08 | 0.489 | -1.1  | 0.492 | -1.01 | 0.787 | -1.17 | 0.060 | 1.3  | 0.003 |
| 1434355_at   | zinc finger protein 617                                               | Zfp617        | 1.25  | 0.062 | 1.42  | 0.034 | 1.09  | 0.715 | 1.21  | 0.031 | 1.3  | 0.006 |
| 1455192_at   | RIKEN cDNA A230078I05 gene                                            | A230078I05Rik | 1.41  | 0.999 | 1.47  | 0.983 | 1.16  | 0.192 | 1.01  | 0.939 | 1.31 | 0.001 |
| 1427091_at   | expressed sequence AI481105                                           | AI481105      | 1.99  | 0.232 | 2.79  | 0.192 | 1.16  | 0.352 | 1.15  | 0.114 | 1.31 | 0.013 |
| 1447104_at   | AT rich interactive domain 1A (Swi1 like)                             | Arid1a        | -1.04 | 0.543 | -1.46 | 0.176 | -1.72 | 0.042 | 1.35  | 0.867 | 1.31 | 0.028 |

|              |                                                                              |               |       |       |       |       |       |       |       |       |      |       |
|--------------|------------------------------------------------------------------------------|---------------|-------|-------|-------|-------|-------|-------|-------|-------|------|-------|
| 1439743_at   | expressed sequence AW048948                                                  | AW048948      | -1.17 | 0.456 | -1.11 | 0.451 | -1.2  | 0.242 | -1.25 | 0.126 | 1.31 | 0.046 |
| 1451620_at   | C1q-like 3                                                                   | C1ql3         | 1.4   | 0.103 | 1.22  | 0.228 | 1.37  | 0.159 | 1.15  | 0.092 | 1.31 | 0.017 |
| 1417019_a_at | cell division cycle 6 homolog (S. cerevisiae)                                | Cdc6          | -1.15 | 0.186 | 1.51  | 0.080 | 1.19  | 0.170 | 1.36  | 0.006 | 1.31 | 0.026 |
| 1449152_at   | cyclin-dependent kinase inhibitor 2B (p15, inhibits CDK4)                    | Cdkn2b        | -1.01 | 0.641 | 1.19  | 0.515 | 1.14  | 0.082 | 1.11  | 0.020 | 1.31 | 0.010 |
| 1448995_at   | chemokine (C-X-C motif) ligand 4                                             | Cxcl4         | -1.25 | 0.146 | 1.04  | 0.572 | 1.09  | 0.073 | -1.04 | 0.177 | 1.31 | 0.013 |
| 1455384_x_at | RIKEN cDNA D030056L22 gene                                                   | D030056L22Rik | -1.13 | 0.478 | -1.05 | 0.576 | 1.4   | 0.193 | 1.1   | 0.216 | 1.31 | 0.030 |
| 1438822_at   | dorso-medial telencephalon gene 2                                            | Dmt2          | -1.42 | 0.292 | 1.06  | 0.499 | 1.5   | 0.143 | -1.28 | 0.306 | 1.31 | 0.013 |
| 1431170_at   | ephrin A3                                                                    | Efna3         | -1.23 | 0.171 | 1.03  | 0.749 | 1.09  | 0.875 | -1.04 | 0.268 | 1.31 | 0.010 |
| 1435544_at   | exosome component 6                                                          | Exosc6        | -1.08 | 0.516 | 1.22  | 0.509 | 1.11  | 0.147 | 1.26  | 0.008 | 1.31 | 0.012 |
| 1426783_at   | GCN5 general control of amino acid synthesis-like 2 (yeast)                  | Gcn5l2        | -1.08 | 0.345 | 1.12  | 0.446 | 1.14  | 0.018 | 1.2   | 0.026 | 1.31 | 0.031 |
| 1434047_x_at | heterogeneous nuclear ribonucleoprotein A2/B1                                | Hnrpa2b1      | -1.16 | 0.385 | -1.01 | 0.759 | 1.16  | 0.202 | 1.15  | 0.205 | 1.31 | 0.014 |
| 1419455_at   | interleukin 10 receptor, beta                                                | Il10rb        | 1.67  | 0.199 | 1.91  | 0.049 | 1.28  | 0.128 | 1.2   | 0.002 | 1.31 | 0.001 |
| 1456092_at   | potassium channel tetramerisation domain containing 7                        | Kctd7         | 1.55  | 0.486 | 1.39  | 0.258 | 2.05  | 0.140 | 1.71  | 0.103 | 1.31 | 0.006 |
| 1429965_at   | LON peptidase N-terminal domain and ring finger 2                            | Lonrf2        | -2.01 | 0.178 | -1.64 | 0.298 | 1.08  | 0.999 | -1.29 | 0.178 | 1.31 | 0.021 |
| 1426516_a_at | lipin 1                                                                      | Lpin1         | 1.86  | 0.108 | 2.06  | 0.097 | 1.27  | 0.724 | 1.01  | 0.971 | 1.31 | 0.003 |
| 1453264_at   | MARVEL (membrane-associating) domain containing 3                            | Marveld3      | -1.3  | 0.082 | 1.01  | 0.813 | 1.39  | 0.617 | 1.23  | 0.858 | 1.31 | 0.035 |
| 1417234_at   | matrix metalloproteinase 11                                                  | Mmp11         | 1.62  | 0.315 | 1.57  | 0.252 | 1.16  | 0.160 | 1.32  | 0.031 | 1.31 | 0.017 |
| 1416852_a_at | neurochondrin                                                                | Ncdn          | -1.23 | 0.380 | 1.13  | 0.692 | 1.26  | 0.191 | 1.1   | 0.247 | 1.31 | 0.035 |
| 1447694_x_at | neogenin                                                                     | Neo1          | -1.2  | 0.175 | -1.08 | 0.345 | 1.47  | 0.358 | -1.01 | 0.655 | 1.31 | 0.025 |
| 1434836_at   | nuclear factor of activated T-cells, cytoplasmic, calcineurin-dependent 2 in | Nfatc2ip      | -1.06 | 0.550 | 1.11  | 0.821 | 1.27  | 0.023 | 1.12  | 0.145 | 1.31 | 0.015 |
| 1438951_x_at | nucleoporin 54                                                               | Nup54         | -1.05 | 0.567 | 1.21  | 0.979 | 1.3   | 0.005 | 1.03  | 0.647 | 1.31 | 0.001 |
| 1452329_at   | pleckstrin homology domain containing, family N member 1                     | Plekhn1       | 1.07  | 0.963 | 1.16  | 0.838 | -1.07 | 0.619 | 1.05  | 0.835 | 1.31 | 0.035 |
| 1449040_a_at | selenophosphate synthetase 2                                                 | Seps2         | -1.11 | 0.467 | 1.14  | 0.683 | 1.15  | 0.382 | 1.03  | 0.866 | 1.31 | 0.024 |
| 1415908_at   | testis-specific protein, Y-encoded-like 1                                    | Tspyl1        | -1.06 | 0.073 | 1.29  | 0.016 | 1.16  | 0.340 | -1.05 | 0.352 | 1.31 | 0.017 |
| 1434689_at   | zinc finger protein 637                                                      | Zfp637        | 1.36  | 0.042 | 1.48  | 0.006 | 1.26  | 0.027 | 1.11  | 0.310 | 1.31 | 0.020 |
| 1417840_at   | RIKEN cDNA 1500031L02 gene                                                   | 1500031L02Rik | -1.01 | 0.586 | 1.17  | 0.993 | 1.22  | 0.058 | 1.24  | 0.085 | 1.32 | 0.018 |
| 1420329_at   | RIKEN cDNA 4930455C21 gene                                                   | 4930455C21Rik | 1.07  | 0.973 | -1.18 | 0.345 | 1.01  | 0.959 | -1.03 | 0.571 | 1.32 | 0.024 |
| 1455682_at   | expressed sequence AA536808                                                  | AA536808      | -1.01 | 0.635 | 1.18  | 0.112 | 1.06  | 0.787 | 1.14  | 0.312 | 1.32 | 0.007 |
| 1417130_s_at | angiopoietin-like 4                                                          | Angptl4       | 1.07  | 0.207 | 1.29  | 0.054 | 1.13  | 0.171 | 1.14  | 0.084 | 1.32 | 0.004 |
| 1416488_at   | cyclin G2                                                                    | Ccng2         | -1    | 0.828 | 1.31  | 0.030 | 1.21  | 0.045 | 1.26  | 0.003 | 1.32 | 0.003 |
| 1451848_a_at | crystallin, zeta                                                             | Cryz          | 1.05  | 0.975 | 1.32  | 0.313 | 1.53  | 0.113 | -1.04 | 0.612 | 1.32 | 0.002 |
| 1429914_at   | enhancer of polycomb homolog 1 (Drosophila)                                  | Epc1          | -1.1  | 0.492 | 1.07  | 0.879 | 1.39  | 0.023 | 1.2   | 0.154 | 1.32 | 0.026 |
| 1422193_at   | guanylate cyclase 2e                                                         | Gucy2e        | -1.13 | 0.178 | -1.01 | 0.854 | -1.01 | 0.772 | -1.03 | 0.559 | 1.32 | 0.007 |
| 1416597_at   | hepatoma-derived growth factor, related protein 2                            | Hdgfrp2       | -1.1  | 0.264 | 1.1   | 0.642 | -1.14 | 0.097 | 1.13  | 0.157 | 1.32 | 0.045 |
| 1416481_s_at | HIG1 domain family, member 1A                                                | Higd1a        | 1.06  | 0.697 | 1.32  | 0.206 | 1.58  | 0.077 | 1.33  | 0.017 | 1.32 | 0.011 |
| 1437589_x_at | Lck interacting transmembrane adaptor 1                                      | Lime1         | 1.63  | 0.180 | 1.96  | 0.052 | 1.07  | 0.717 | 1.09  | 0.609 | 1.32 | 0.008 |
| 1439415_x_at | similar to 40S ribosomal protein S21                                         | LOC622373     | -1.45 | 0.280 | -1.24 | 0.388 | 1.05  | 0.876 | -1.17 | 0.191 | 1.32 | 0.011 |
| 1434278_at   | X-linked myotubular myopathy gene 1                                          | Mtm1          | 1.14  | 0.445 | 1.54  | 0.123 | 1.13  | 0.397 | 1.31  | 0.215 | 1.32 | 0.049 |
| 1434807_s_at | metaxin 3                                                                    | Mtx3          | -1.04 | 0.564 | 1.09  | 0.728 | 1.32  | 0.194 | 1.24  | 0.238 | 1.32 | 0.017 |
| 1449550_at   | myosin IC                                                                    | Myo1c         | 1.05  | 0.348 | 1.33  | 0.019 | 1.3   | 0.048 | 1.25  | 0.012 | 1.32 | 0.020 |
| 1425902_a_at | nuclear factor of kappa light polypeptide gene enhancer in B-cells 2, p49/p  | Nfkb2         | 2.95  | 0.560 | 5.06  | 0.326 | 1.15  | 0.723 | 1.09  | 0.059 | 1.32 | 0.005 |
| 1428661_at   | nuclear factor of kappa light polypeptide gene enhancer in B-cells inhibitor | Nfkbil2       | -1.36 | 0.003 | 1.12  | 0.293 | -1.04 | 0.572 | 1.15  | 0.369 | 1.32 | 0.027 |
| 1422707_at   | phosphoinositide-3-kinase, catalytic, gamma polypeptide                      | Pik3cg        | -1.12 | 0.038 | -1.32 | 0.028 | 1.12  | 0.437 | 1.16  | 0.057 | 1.32 | 0.031 |
| 1438854_x_at | phosphatidylinositol membrane-associated 1                                   | Pitpnm1       | 1.08  | 0.738 | 1.11  | 0.509 | 1.05  | 0.914 | -1.24 | 0.030 | 1.32 | 0.029 |
| 1422624_at   | REV1-like (S. cerevisiae)                                                    | Rev1l         | 1.57  | 0.398 | 2.37  | 0.102 | 1.48  | 0.384 | 1.15  | 0.446 | 1.32 | 0.019 |
| 1428766_at   | RNA methyltransferase like 1                                                 | Rnmtl1        | 1.03  | 0.383 | 1.23  | 0.018 | 1.17  | 0.150 | 1.24  | 0.002 | 1.32 | 0.004 |
| 1420502_at   | spermidine/spermine N1-acetyl transferase 1                                  | Sat1          | 1.29  | 0.135 | 1.7   | 0.006 | 1.38  | 0.014 | 1.27  | 0.011 | 1.32 | 0.006 |
| 1441315_s_at | solute carrier family 19 (thiamine transporter), member 2                    | Slc19a2       | 1.03  | 0.634 | 1.47  | 0.531 | 1.27  | 0.017 | 1.08  | 0.012 | 1.32 | 0.044 |
| 1451013_at   | solute carrier family 29 (nucleoside transporters), member 3                 | Slc29a3       | 1.01  | 0.686 | 1.2   | 0.072 | 2.36  | 0.023 | 2.34  | 0.057 | 1.32 | 0.045 |
| 1451181_at   | transmembrane protein 121                                                    | Tmem121       | 1.2   | 0.600 | 1.69  | 0.278 | 1.59  | 0.769 | -1.18 | 0.350 | 1.32 | 0.010 |
| 1417888_at   | tripartite motif protein 13                                                  | Trim13        | 1.5   | 0.063 | 1.64  | 0.054 | 1.23  | 0.001 | 1.14  | 0.255 | 1.32 | 0.006 |
| 1427476_a_at | tripartite motif protein 32                                                  | Trim32        | -1.06 | 0.493 | 1.31  | 0.241 | 1.17  | 0.112 | 1.18  | 0.194 | 1.32 | 0.027 |
| 1455268_at   | zinc finger, CSL domain containing 2                                         | Zcsf2         | 1.11  | 0.191 | 1.4   | 0.003 | 1.22  | 0.046 | 1.17  | 0.168 | 1.32 | 0.018 |
| 1428441_at   | RIKEN cDNA 1500009M05 gene                                                   | 1500009M05Rik | 1.03  | 0.791 | 1.13  | 0.801 | 1.22  | 0.077 | 1.16  | 0.120 | 1.33 | 0.008 |
| 1429451_at   | RIKEN cDNA 2610301B20 gene                                                   | 2610301B20Rik | 4.28  | 0.264 | 3.69  | 0.117 | 1.26  | 0.049 | 1.12  | 0.445 | 1.33 | 0.025 |
| 1434591_at   | RIKEN cDNA 4732460K03 gene                                                   | 4732460K03Rik | -1.17 | 0.084 | -1.07 | 0.500 | 1.23  | 0.062 | -1.01 | 0.833 | 1.33 | 0.040 |
| 1453768_a_at | RIKEN cDNA 5430432M24 gene                                                   | 5430432M24Rik | 1.48  | 0.750 | 1.99  | 0.143 | 1.17  | 0.114 | 1.18  | 0.050 | 1.33 | 0.047 |
| 1428145_at   | acetyl-Coenzyme A acyltransferase 2 (mitochondrial 3-oxoacyl-Coenzyme        | Acaa2         | 1.34  | 0.334 | 1.34  | 0.057 | 1.31  | 0.133 | 1.05  | 0.718 | 1.33 | 0.004 |

|              |                                                                        |                   |       |       |       |       |       |       |       |       |      |       |
|--------------|------------------------------------------------------------------------|-------------------|-------|-------|-------|-------|-------|-------|-------|-------|------|-------|
| 1435793_at   | anterior pharynx defective 1b homolog (C. elegans)                     | Aph1b             | 1.14  | 0.447 | 1.16  | 0.542 | 1.07  | 0.946 | 1.03  | 0.623 | 1.33 | 0.030 |
| 1421164_a_at | Rho guanine nucleotide exchange factor (GEF) 1                         | Arhgef1           | -1.09 | 0.295 | -1.13 | 0.249 | -1.03 | 0.687 | -1.14 | 0.262 | 1.33 | 0.002 |
| 1434350_at   | AXIN1 up-regulated 1                                                   | Axud1             | 1.03  | 0.547 | 1.16  | 0.089 | 1.09  | 0.369 | 1     | 0.944 | 1.33 | 0.044 |
| 1424757_at   | cDNA sequence BC018242                                                 | BC018242          | -1.02 | 0.601 | 1.11  | 0.846 | 1.17  | 0.520 | -1.1  | 0.250 | 1.33 | 0.025 |
| 1436639_at   | bolA-like 2 (E. coli)                                                  | Bola2             | 1.01  | 0.725 | 1.14  | 0.810 | 1.03  | 0.871 | 1.15  | 0.382 | 1.33 | 0.004 |
| 1458330_x_at | Cyclin M3                                                              | Cnmn3             | 1.27  | 0.999 | 1.74  | 0.652 | 1.01  | 0.954 | 1.66  | 0.163 | 1.33 | 0.020 |
| 1451052_at   | component of oligomeric golgi complex 8                                | Cog8              | 1.02  | 0.770 | 1.32  | 0.645 | 1.14  | 0.231 | 1.13  | 0.237 | 1.33 | 0.028 |
| 1446958_at   | DNA segment, Chr 13, ERATO Doi 150, expressed                          | D13Erttd150e      | -1.21 | 0.464 | -1.01 | 0.802 | 1.12  | 0.615 | -1.18 | 0.364 | 1.33 | 0.039 |
| 1450886_at   | germ cell-specific gene 2                                              | Gsg2              | 1.98  | 0.429 | 2.15  | 0.005 | 1.14  | 0.177 | 1.22  | 0.084 | 1.33 | 0.019 |
| 1456610_at   | jumonji domain containing 3                                            | Jmj3              | 1.18  | 0.366 | 1.39  | 0.092 | 1.02  | 0.920 | 1.18  | 0.406 | 1.33 | 0.047 |
| 1424988_at   | myosin regulatory light chain interacting protein                      | Myli1             | 1.01  | 0.556 | 1.05  | 0.498 | 1.33  | 0.015 | 1.45  | 0.007 | 1.33 | 0.038 |
| 1419147_at   | REC8-like 1 (yeast)                                                    | Rec8L1            | -1.42 | 0.344 | -1.1  | 0.445 | 1.09  | 0.767 | 1.08  | 0.938 | 1.33 | 0.017 |
| 1429462_at   | solute carrier family 25, member 32                                    | Slc25a32          | 1.15  | 0.574 | 1.02  | 0.851 | 1.13  | 0.789 | 1.3   | 0.330 | 1.33 | 0.047 |
| 1429596_at   | solute carrier family 7, member 6 opposite strand                      | Slc7a6os          | 1.03  | 0.666 | 1.4   | 0.833 | 1.22  | 0.291 | 1.12  | 0.015 | 1.33 | 0.027 |
| 1449125_at   | tumor necrosis factor, alpha-induced protein 8-like 1                  | Tnfaip8l1         | -1.25 | 0.277 | -1.09 | 0.504 | 1.24  | 0.267 | 1.18  | 0.052 | 1.33 | 0.013 |
| 1428746_a_at | tRNA selenocysteine associated protein 1                               | Trspap1           | -1.1  | 0.453 | 1.14  | 0.611 | 1.18  | 0.139 | 1.07  | 0.180 | 1.33 | 0.024 |
| 1452418_at   | RIKEN cDNA 1200016E24 gene                                             | 1200016E24Rik     | -1.29 | 0.020 | 1.03  | 0.472 | -1.08 | 0.608 | 1.05  | 0.925 | 1.34 | 0.035 |
| 1435690_at   | RIKEN cDNA 2310008H09 gene                                             | 2310008H09Rik     | 1.19  | 0.265 | 1.62  | 0.054 | 1.24  | 0.109 | 1.43  | 0.063 | 1.34 | 0.005 |
| 1449274_at   | RIKEN cDNA 2310038H17 gene                                             | 2310038H17Rik     | 1.12  | 0.378 | 1.07  | 0.484 | 1.15  | 0.356 | 1.07  | 0.161 | 1.34 | 0.003 |
| 1432454_at   | RIKEN cDNA 2410137M14 gene                                             | 2410137M14Rik     | -1.21 | 0.401 | -1.09 | 0.467 | 1.31  | 0.152 | -1.23 | 0.400 | 1.34 | 0.036 |
| 1456331_at   | RIKEN cDNA 9130023H24 gene                                             | 9130023H24Rik     | -1.16 | 0.378 | -1.05 | 0.506 | 1.08  | 0.506 | 1.15  | 0.048 | 1.34 | 0.004 |
| 1456643_at   | RIKEN cDNA 9230114K14 gene                                             | 9230114K14Rik     | 1.79  | 0.015 | 3.25  | 0.006 | 1.22  | 0.409 | 1.12  | 0.323 | 1.34 | 0.003 |
| 1417212_at   | RIKEN cDNA 9530058B02 gene                                             | 9530058B02Rik     | 1.01  | 0.486 | 1.54  | 0.528 | 1.08  | 0.674 | 1.26  | 0.109 | 1.34 | 0.020 |
| 1425994_a_at | N-acylsphingosine amidohydrolase 2                                     | Asah2             | -1.58 | 0.281 | -1.23 | 0.318 | 1.15  | 0.891 | 1.09  | 0.914 | 1.34 | 0.007 |
| 1427912_at   | carbonyl reductase 3                                                   | Cbr3              | -1.03 | 0.630 | 1.43  | 0.160 | 1.25  | 0.019 | 1.16  | 0.073 | 1.34 | 0.004 |
| 1433782_at   | claudin 12                                                             | Cldn12            | -1.05 | 0.373 | 1.2   | 0.058 | 1.19  | 0.079 | 1.12  | 0.013 | 1.34 | 0.004 |
| 1454921_at   | gene model 561, (NCBI)                                                 | Gm561             | -1.07 | 0.520 | 1.12  | 0.931 | 1.06  | 0.432 | 1.14  | 0.208 | 1.34 | 0.033 |
| 1423525_at   | microtubule associated serine/threonine kinase-like                    | Mast1             | 2.66  | 0.377 | 3.91  | 0.514 | 1.46  | 0.007 | 1.02  | 0.910 | 1.34 | 0.021 |
| 1422474_at   | phosphodiesterase 4B, cAMP specific                                    | Pde4b             | 1.26  | 0.166 | 1.57  | 0.053 | 1.2   | 0.000 | 1.27  | 0.079 | 1.34 | 0.031 |
| 1459733_at   | Phosphoprotein enriched in astrocytes 15                               | Pea15             | 1.03  | 0.678 | 1.43  | 0.058 | -1.2  | 0.131 | 1.3   | 0.106 | 1.34 | 0.022 |
| 1425021_a_at | peroxisome biogenesis factor 16                                        | Pex16             | 1.12  | 0.263 | 1.21  | 0.451 | -1.11 | 0.276 | 1.09  | 0.151 | 1.34 | 0.037 |
| 1456482_at   | phosphatidylinositol 3 kinase, regulatory subunit, polypeptide 3 (p55) | Pik3r3            | -1.09 | 0.283 | 1.15  | 0.200 | 1.07  | 0.090 | 1.21  | 0.111 | 1.34 | 0.034 |
| 1418404_at   | RAD9 homolog (S. pombe)                                                | Rad9              | 1.12  | 0.323 | 1.4   | 0.190 | 1.1   | 0.664 | 1.05  | 0.385 | 1.34 | 0.019 |
| 1455197_at   | Rho family GTPase 1                                                    | Rnd1              | 1.18  | 0.366 | 1.27  | 0.074 | 1.28  | 0.084 | 1.54  | 0.002 | 1.34 | 0.008 |
| 1434490_at   | scavenger receptor class F, member 1                                   | Scarf1            | 1.02  | 0.930 | -1.03 | 0.638 | 1.1   | 0.209 | -1.11 | 0.461 | 1.34 | 0.039 |
| 1417406_at   | SERTA domain containing 1                                              | Sertad1           | -1.06 | 0.513 | 1.14  | 0.969 | 1.3   | 0.007 | 1.26  | 0.006 | 1.34 | 0.021 |
| 1423809_at   | transcription factor 19                                                | Tcf19             | 1.14  | 0.094 | 1.51  | 0.034 | 1.33  | 0.254 | 1.15  | 0.037 | 1.34 | 0.031 |
| 1452132_at   | TLC domain containing 1                                                | Tlcd1             | 1.3   | 0.230 | 1.66  | 0.043 | 1.26  | 0.157 | 1.2   | 0.076 | 1.34 | 0.023 |
| 1430576_at   | tripeptidyl peptidase II                                               | Tpp2              | -1.47 | 0.263 | 1.08  | 0.619 | 1.32  | 0.408 | 1.53  | 0.202 | 1.34 | 0.010 |
| 1423869_s_at | thioredoxin reductase 3                                                | Txnrd3            | 1.14  | 0.376 | 1.01  | 0.940 | 1.12  | 0.319 | -1.09 | 0.209 | 1.34 | 0.002 |
| 1418545_at   | WASP family 1                                                          | Wasf1             | -1.36 | 0.270 | -1.19 | 0.355 | 1.47  | 0.003 | 1.15  | 0.086 | 1.34 | 0.046 |
| 1434552_at   | WD repeat domain 77                                                    | Wdr77             | -1.1  | 0.347 | 1.2   | 0.335 | 1.37  | 0.000 | 1.3   | 0.001 | 1.34 | 0.000 |
| 1460572_a_at | zinc finger protein 511                                                | Zfp511            | 1.21  | 0.313 | 1.48  | 0.263 | -1    | 0.938 | 1.12  | 0.181 | 1.34 | 0.019 |
| 1455544_at   | zinc finger, RAN-binding domain containing 3                           | Zranb3            | 1.93  | 0.117 | -1.22 | 0.338 | -1.12 | 0.559 | -1.25 | 0.168 | 1.34 | 0.034 |
| 1428366_at   | RIKEN cDNA 1600027N09 gene                                             | 1600027N09Rik     | 1.01  | 0.807 | 1.06  | 0.965 | 1.08  | 0.857 | 1.17  | 0.299 | 1.35 | 0.016 |
| 1426012_a_at | RIKEN cDNA 2610301G19 gene                                             | 2610301G19Rik     | 1.09  | 0.871 | 1.26  | 0.321 | -1.02 | 0.886 | 1.09  | 0.366 | 1.35 | 0.030 |
| 1432883_at   | RIKEN cDNA 4932431P20 gene                                             | 4932431P20Rik     | 1.07  | 0.967 | 1.32  | 0.456 | 1.06  | 0.740 | 1.06  | 0.805 | 1.35 | 0.005 |
| 1428502_at   | ARP6 actin-related protein 6 homolog (yeast)                           | Actr6             | -1.09 | 0.550 | 1.1   | 0.528 | 1.32  | 0.040 | 1.18  | 0.100 | 1.35 | 0.012 |
| 1437629_at   | Rho guanine nucleotide exchange factor (GEF) 19                        | Arhgef19          | 1.71  | 0.326 | 1.94  | 0.084 | 1.12  | 0.614 | 1.02  | 0.775 | 1.35 | 0.022 |
| 1431496_at   | RIKEN cDNA B230104F01 gene                                             | B230104F01Rik     | -1.03 | 0.697 | -1.47 | 0.009 | 1.16  | 0.368 | 1.14  | 0.686 | 1.35 | 0.015 |
| 1457277_at   | cDNA sequence BC038925                                                 | BC038925          | 1.03  | 0.930 | 1.3   | 0.325 | -1.27 | 0.162 | 1.09  | 0.618 | 1.35 | 0.032 |
| 1435488_at   | RIKEN cDNA C630010D07 gene /// similar to methylenetetrahydrofolate di | C630010D07Rik /// | -1.03 | 0.730 | 1.24  | 0.024 | 1.26  | 0.091 | 1.21  | 0.136 | 1.35 | 0.019 |
| 1419523_at   | cytochrome P450, family 3, subfamily a, polypeptide 13                 | Cyp3a13           | -1.27 | 0.222 | -1.07 | 0.344 | 1.42  | 0.459 | 1.75  | 0.915 | 1.35 | 0.030 |
| 1428015_at   | DNA segment, Chr 12, Wayne State University 118, expressed             | D12Wsu118e        | -1.46 | 0.237 | -1.33 | 0.120 | 1.01  | 0.831 | 1.12  | 0.811 | 1.35 | 0.040 |
| 1439012_a_at | deoxycytidine kinase                                                   | Dck               | -1.12 | 0.481 | 1.16  | 0.943 | 1.5   | 0.063 | 1.05  | 0.250 | 1.35 | 0.021 |
| 1442135_at   | Gene model 237, (NCBI)                                                 | Gm237             | 1.05  | 0.510 | 1.23  | 0.036 | 1.18  | 0.176 | 1.3   | 0.059 | 1.35 | 0.027 |
| 1455065_x_at | glucosamine-6-phosphate deaminase 1 /// similar to Glucosamine-6-phosp | Gnpda1 ///        | -1.1  | 0.471 | -1.01 | 0.541 | 1.31  | 0.050 | 1.24  | 0.001 | 1.35 | 0.018 |
| 1429670_a_at | leucine-rich repeats and IQ motif containing 2                         | Lrriq2            | -1.09 | 0.510 | 1.19  | 0.157 | 1.13  | 0.575 | 1.47  | 0.115 | 1.35 | 0.020 |

|              |                                                                                 |                    |       |       |       |       |       |       |       |       |      |       |
|--------------|---------------------------------------------------------------------------------|--------------------|-------|-------|-------|-------|-------|-------|-------|-------|------|-------|
| 1447361_at   | Metaxin 1                                                                       | Mtx1               | -1.21 | 0.271 | 1.33  | 0.689 | 1.71  | 0.003 | -1.04 | 0.812 | 1.35 | 0.047 |
| 1456748_a_at | 4-nitrophenylphosphatase domain and non-neuronal SNAP25-like protein            | Nipsnap1           | 1.26  | 0.041 | 1.2   | 0.727 | 2.93  | 0.134 | 1.11  | 0.782 | 1.35 | 0.002 |
| 1428896_at   | platelet-derived growth factor receptor-like                                    | Pdgfrl             | 1.04  | 0.801 | 1.02  | 0.845 | -1.05 | 0.395 | 1.03  | 0.842 | 1.35 | 0.044 |
| 1429527_a_at | phospholipid scramblase 1 /// hypothetical LOC433328 /// hypothetical prot      | Plscr1 /// LOC4333 | 1.15  | 0.777 | 1.31  | 0.457 | 1.27  | 0.319 | 1     | 0.894 | 1.35 | 0.015 |
| 1448722_s_at | phosphopantothenoylecysteine synthetase                                         | Ppcc               | -1.09 | 0.494 | 1.15  | 0.775 | 1.36  | 0.013 | 1.4   | 0.011 | 1.35 | 0.039 |
| 1436589_x_at | protein kinase D2                                                               | Prkd2              | -1.02 | 0.601 | 1.38  | 0.168 | 1.25  | 0.169 | 1.22  | 0.086 | 1.35 | 0.039 |
| 1445749_at   | Ring finger protein 4                                                           | Rnf4               | 1.41  | 0.880 | 1.58  | 0.933 | 2.17  | 0.269 | 1.96  | 0.515 | 1.35 | 0.038 |
| 1433680_x_at | Cd27 binding protein (Hindu God of destruction)                                 | Siva               | -1.14 | 0.415 | 1.16  | 0.873 | 1.12  | 0.754 | 1.27  | 0.082 | 1.35 | 0.044 |
| 1418074_at   | ST6 (alpha-N-acetyl-neuraminylnyl-2,3-beta-galactosyl-1,3)-N-acetylgalactosi    | St6galnac4         | 1     | 0.884 | 1.25  | 0.242 | 1.16  | 0.144 | 1.31  | 0.031 | 1.35 | 0.039 |
| 1424191_a_at | transmembrane protein 41a                                                       | Tmem41a            | -1.13 | 0.162 | 1.31  | 0.135 | 1.07  | 0.648 | 1.55  | 0.271 | 1.35 | 0.009 |
| 1428313_at   | zinc finger, SWIM domain containing 3                                           | Zswim3             | -1.06 | 0.450 | 1.03  | 0.768 | 1.05  | 0.458 | 1     | 0.872 | 1.35 | 0.002 |
| 1437617_x_at | RIKEN cDNA 1110034G24 gene                                                      | 1110034G24Rik      | 1.03  | 0.618 | 1.32  | 0.860 | 1.45  | 0.007 | -1.67 | 0.016 | 1.36 | 0.019 |
| 1423656_x_at | RIKEN cDNA 1500010J02 gene                                                      | 1500010J02Rik      | 1.12  | 0.237 | 1.29  | 0.079 | -1.09 | 0.491 | 1.05  | 0.037 | 1.36 | 0.027 |
| 1435776_at   | RIKEN cDNA 2310009B15 gene                                                      | 2310009B15Rik      | -1.1  | 0.334 | 1.2   | 0.938 | 1.18  | 0.153 | 1.06  | 0.585 | 1.36 | 0.006 |
| 1426935_at   | RIKEN cDNA 6330590E21 gene                                                      | 6330590E21Rik      | 1.12  | 0.518 | 1.25  | 0.479 | 1.18  | 0.705 | -1.29 | 0.140 | 1.36 | 0.026 |
| 1446935_at   | RIKEN cDNA 9130011E15 gene                                                      | 9130011E15Rik      | -1.19 | 0.234 | 1.02  | 0.379 | 1.37  | 0.829 | 3.15  | 0.222 | 1.36 | 0.011 |
| 1442452_at   | amyotrophic lateral sclerosis 2 (juvenile) chromosome region, candidate 2       | Als2cr2            | 1.07  | 0.754 | -1.14 | 0.263 | 2.26  | 0.455 | 1.28  | 0.753 | 1.36 | 0.006 |
| 1424682_at   | ATP binding domain 1 family, member C                                           | Atpbd1c            | -1.03 | 0.490 | 1.19  | 0.467 | 1.23  | 0.154 | 1.17  | 0.043 | 1.36 | 0.005 |
| 1451654_x_at | cDNA sequence BC012278                                                          | BC012278           | 1.69  | 0.120 | 1.52  | 0.057 | -1.06 | 0.780 | 1.18  | 0.057 | 1.36 | 0.042 |
| 1431692_a_at | Casitas B-lineage lymphoma c                                                    | Cblc               | -1.43 | 0.076 | -1.3  | 0.199 | -1.03 | 0.662 | 1.13  | 0.601 | 1.36 | 0.026 |
| 1418762_at   | CD55 antigen                                                                    | Cd55               | -1.2  | 0.655 | 1.07  | 0.705 | 2.01  | 0.884 | 1.65  | 0.339 | 1.36 | 0.005 |
| 1450833_at   | cholinergic receptor, muscarinic 1, CNS                                         | Chrm1              | -1.57 | 0.071 | -1.13 | 0.458 | 1.1   | 0.566 | -1.27 | 0.196 | 1.36 | 0.004 |
| 1436926_at   | estrogen related receptor, beta                                                 | Esrrb              | -1.13 | 0.548 | -1.24 | 0.112 | -1.07 | 0.641 | -1.49 | 0.149 | 1.36 | 0.040 |
| 1424793_a_at | phosphatidylethanolamine binding protein 2                                      | Pbp2               | 1.01  | 0.733 | 1.25  | 0.156 | 1.25  | 0.006 | 1.26  | 0.243 | 1.36 | 0.011 |
| 1454738_x_at | peroxisomal biogenesis factor 6                                                 | Pex6               | -1.28 | 0.368 | 1.03  | 0.536 | 1.23  | 0.060 | 1.05  | 0.490 | 1.36 | 0.045 |
| 1433668_at   | proline-rich nuclear receptor coactivator 1                                     | Pnrc1              | 1     | 0.913 | 1.29  | 0.129 | 1.27  | 0.031 | 1.19  | 0.005 | 1.36 | 0.010 |
| 1434940_x_at | regulator of G-protein signaling 19                                             | Rgs19              | -1.31 | 0.277 | -1.01 | 0.633 | 1.08  | 0.474 | -1    | 0.942 | 1.36 | 0.039 |
| 1425439_a_at | solute carrier family 41, member 3                                              | Slc41a3            | 1.09  | 0.533 | 1.15  | 0.045 | 1.04  | 0.868 | 1     | 0.953 | 1.36 | 0.033 |
| 1453034_at   | zinc finger protein 251                                                         | Zfp251             | 1.09  | 0.999 | 1.3   | 0.558 | 1.08  | 0.552 | 1.23  | 0.035 | 1.36 | 0.049 |
| 1429758_at   | RIKEN cDNA 1700017B05 gene /// hypothetical protein LOC640563                   | 1700017B05Rik ///  | 1.13  | 0.499 | 1.27  | 0.173 | 1.05  | 0.376 | 1.23  | 0.158 | 1.37 | 0.040 |
| 1454124_at   | RIKEN cDNA 1700067K01 gene                                                      | 1700067K01Rik      | 3.25  | 0.442 | 5.74  | 0.288 | -1.26 | 0.346 | 1.11  | 0.598 | 1.37 | 0.031 |
| 1428836_at   | RIKEN cDNA 2300009A05 gene                                                      | 2300009A05Rik      | 1     | 0.984 | 1.16  | 0.046 | 1.22  | 0.016 | 1.29  | 0.014 | 1.37 | 0.002 |
| 1425240_at   | cDNA sequence BC011426                                                          | BC011426           | 1.1   | 0.718 | 1     | 0.489 | 1.22  | 0.737 | -1.04 | 0.529 | 1.37 | 0.039 |
| 1434171_at   | RIKEN cDNA C330011K17 gene                                                      | C330011K17Rik      | 1.31  | 0.509 | 1.99  | 0.022 | 1.15  | 0.357 | 1.28  | 0.110 | 1.37 | 0.026 |
| 1450691_at   | cask-interacting protein 2                                                      | Caskin2            | 1.17  | 0.879 | -1.03 | 0.561 | -1.14 | 0.046 | 1.17  | 0.301 | 1.37 | 0.016 |
| 1428069_at   | cell division cycle associated 7                                                | Cdca7              | 1.26  | 0.680 | 1.67  | 0.007 | 1.49  | 0.040 | 1.09  | 0.294 | 1.37 | 0.010 |
| 1441943_x_at | Cytokine induced apoptosis inhibitor 1                                          | Ciapi1             | -1.39 | 0.355 | -1.19 | 0.409 | 1.13  | 0.532 | 1.08  | 0.687 | 1.37 | 0.036 |
| 1437146_x_at | coronin 7                                                                       | Coro7              | -1.03 | 0.649 | -1.04 | 0.575 | -1.19 | 0.067 | 1.03  | 0.761 | 1.37 | 0.006 |
| 1435348_at   | RIKEN cDNA D930009K15 gene                                                      | D930009K15Rik      | 1.05  | 0.722 | 1.27  | 0.073 | 1.28  | 0.030 | 1.37  | 0.011 | 1.37 | 0.003 |
| 1426593_a_at | F-box only protein 22                                                           | Fbxo22             | -1.32 | 0.311 | 1.05  | 0.792 | 1.2   | 0.217 | 1.06  | 0.269 | 1.37 | 0.010 |
| 1460673_at   | folypolyglutamyl synthetase                                                     | Fpqs               | -1.03 | 0.575 | 1.37  | 0.251 | 1.22  | 0.375 | 1.34  | 0.013 | 1.37 | 0.004 |
| 1440817_x_at | RIKEN cDNA G630024C07 gene                                                      | G630024C07Rik      | -1.12 | 0.443 | 1.07  | 0.714 | 1.15  | 0.335 | 1.21  | 0.015 | 1.37 | 0.050 |
| 1420499_at   | GTP cyclohydrolase 1                                                            | Gch1               | -1.2  | 0.272 | -1.16 | 0.208 | 1.07  | 0.830 | 1.03  | 0.951 | 1.37 | 0.041 |
| 1417477_at   | gene trap locus F3b                                                             | Gtlf3b             | -1.11 | 0.340 | 1.19  | 0.500 | 1.32  | 0.004 | 1.17  | 0.001 | 1.37 | 0.016 |
| 1452166_a_at | keratin 10                                                                      | Krt10              | 1.07  | 0.957 | 1.32  | 0.247 | 1.31  | 0.018 | 1.22  | 0.099 | 1.37 | 0.012 |
| 1435705_at   | similar to hypothetical protein FLJ12895                                        | LOC232875          | 1     | 0.640 | 1.25  | 0.709 | 1.35  | 0.226 | 1.14  | 0.207 | 1.37 | 0.018 |
| 1435198_at   | hypothetical protein LOC545228                                                  | LOC545228          | 1.09  | 0.505 | 1.09  | 0.705 | -1.08 | 0.472 | 1.23  | 0.423 | 1.37 | 0.023 |
| 1417483_at   | nuclear factor of kappa light polypeptide gene enhancer in B-cells inhibitor    | Nfkbiz             | 1     | 0.723 | 1.28  | 0.164 | 1.5   | 0.016 | 1.22  | 0.030 | 1.37 | 0.034 |
| 1451077_at   | ribosomal protein L5 /// similar to 60S ribosomal protein L5 /// similar to 60S | Rpl5 /// LOC38274  | 1.3   | 0.277 | 1.64  | 0.060 | 1.36  | 0.054 | 1.2   | 0.398 | 1.37 | 0.012 |
| 1417719_at   | sin3 associated polypeptide                                                     | Sap30              | -1    | 0.875 | 1.29  | 0.182 | 1.14  | 0.206 | 1.26  | 0.012 | 1.37 | 0.006 |
| 1419404_s_at | seven in absentia 1A /// seven in absentia 1B                                   | Siah1a /// Siah1b  | 1.15  | 0.559 | 1.31  | 0.078 | 1.32  | 0.231 | -1.11 | 0.296 | 1.37 | 0.032 |
| 1421275_s_at | suppressor of cytokine signaling 4                                              | Socs4              | -1    | 0.579 | 1.2   | 0.796 | 1.14  | 0.224 | 1.16  | 0.219 | 1.37 | 0.045 |
| 1451596_a_at | sphingosine kinase 1                                                            | Sphk1              | 1.07  | 0.348 | 1.33  | 0.015 | 1.19  | 0.192 | 1.27  | 0.000 | 1.37 | 0.022 |
| 1443619_at   | transmembrane protein 30A                                                       | Tmem30a            | 1.14  | 0.182 | 1.23  | 0.211 | -1.09 | 0.609 | -1.02 | 0.886 | 1.37 | 0.029 |
| 1424849_at   | WD repeat domain 62                                                             | Wdr62              | 2.79  | 0.606 | 3.08  | 0.693 | 1.21  | 0.125 | 1.01  | 0.927 | 1.37 | 0.023 |
| 1421711_at   | zinc finger protein 109                                                         | Zfp109             | -1.07 | 0.503 | 1.09  | 0.704 | 1     | 0.797 | 1.08  | 0.535 | 1.37 | 0.037 |
| 1436150_at   | RIKEN cDNA 1700066J24 gene                                                      | 1700066J24Rik      | -1.31 | 0.250 | -1.12 | 0.400 | -1.13 | 0.274 | -1    | 0.694 | 1.38 | 0.013 |
| 1419074_at   | RIKEN cDNA 2510006C20 gene                                                      | 2510006C20Rik      | 1.11  | 0.163 | 1.39  | 0.015 | 1.25  | 0.036 | 1.14  | 0.010 | 1.38 | 0.042 |

|              |                                                                               |               |       |       |       |       |       |       |       |       |      |       |
|--------------|-------------------------------------------------------------------------------|---------------|-------|-------|-------|-------|-------|-------|-------|-------|------|-------|
| 1432425_at   | RIKEN cDNA 4930418G15 gene                                                    | 4930418G15Rik | 2.15  | 0.462 | 2.55  | 0.330 | 1.34  | 0.405 | -1.03 | 0.638 | 1.38 | 0.018 |
| 1438024_at   | RIKEN cDNA 6230416A05 gene                                                    | 6230416A05Rik | -1.12 | 0.427 | 1.04  | 0.927 | 1.19  | 0.074 | 1.17  | 0.003 | 1.38 | 0.004 |
| 1430268_at   | RIKEN cDNA 9630005C17 gene                                                    | 9630005C17Rik | -1.14 | 0.326 | -1.58 | 0.024 | 1.03  | 0.875 | 2.08  | 0.589 | 1.38 | 0.033 |
| 1458855_at   | DNA segment, Chr 11, ERATO Doi 49, expressed                                  | D11Ert049e    | -1.15 | 0.344 | 1.3   | 0.424 | 1.1   | 0.907 | 1.33  | 0.616 | 1.38 | 0.034 |
| 1439531_at   | RIKEN cDNA E130311K13 gene                                                    | E130311K13Rik | 1.01  | 0.717 | 1.05  | 0.936 | 1.17  | 0.194 | 1.07  | 0.249 | 1.38 | 0.031 |
| 1449169_at   | hyaluronan synthase 2                                                         | Has2          | 1.41  | 0.023 | 1.81  | 0.113 | 1.36  | 0.005 | 1.39  | 0.003 | 1.38 | 0.023 |
| 1449230_at   | iduronidase, alpha-L-                                                         | Idua          | 1.16  | 0.709 | 1.19  | 0.854 | -1    | 0.847 | 1.01  | 0.872 | 1.38 | 0.050 |
| 1456676_a_at | 6-phosphofructo-2-kinase/fructose-2,6-biphosphatase 3                         | Pfkfb3        | -1.01 | 0.768 | 1.1   | 0.522 | 1.23  | 0.440 | 1.22  | 0.073 | 1.38 | 0.048 |
| 1421646_a_at | protein inhibitor of activated STAT 3                                         | Pias3         | 3.78  | 0.568 | 4.94  | 0.426 | 1.16  | 0.067 | 1.61  | 0.046 | 1.38 | 0.040 |
| 1434496_at   | polo-like kinase 3 (Drosophila)                                               | Plk3          | 1.11  | 0.903 | 1.3   | 0.253 | -1.12 | 0.371 | -1.03 | 0.619 | 1.38 | 0.014 |
| 1450816_at   | polymerase (DNA directed), gamma 2, accessory subunit                         | Polg2         | -1.38 | 0.307 | -1.07 | 0.508 | -1.12 | 0.692 | 1.23  | 0.084 | 1.38 | 0.043 |
| 1435057_x_at | polymerase (RNA) I polypeptide E                                              | Polr1e        | -1.01 | 0.702 | 1.34  | 0.371 | 1.13  | 0.055 | 1.23  | 0.049 | 1.38 | 0.028 |
| 1417972_s_at | processing of precursor 5, ribonuclease P/MRP family (S. cerevisiae)          | Pop5          | 1.1   | 0.342 | 1.58  | 0.003 | 1.17  | 0.038 | 1.23  | 0.015 | 1.38 | 0.016 |
| 1430979_a_at | peroxiredoxin 2                                                               | Prdx2         | 1.14  | 0.487 | 1.43  | 0.068 | 1.13  | 0.137 | 1.23  | 0.001 | 1.38 | 0.004 |
| 1418181_at   | protein tyrosine phosphatase 4a3                                              | Ptp4a3        | 1.66  | 0.306 | 2.48  | 0.035 | 1.24  | 0.080 | 1.21  | 0.045 | 1.38 | 0.036 |
| 1426965_at   | RAS related protein 2a                                                        | Rap2a         | -1.03 | 0.529 | 1.23  | 0.019 | 1.22  | 0.040 | 1.17  | 0.048 | 1.38 | 0.008 |
| 1418640_at   | sirtuin 1 ((silent mating type information regulation 2, homolog) 1 (S. cerev | Sirt1         | 1.68  | 0.228 | 1.91  | 0.026 | 1.33  | 0.090 | 1.22  | 0.088 | 1.38 | 0.023 |
| 1457780_at   | syntaxin 11                                                                   | Stx11         | 1.13  | 0.938 | 1.72  | 0.170 | 1.44  | 0.301 | 1.16  | 0.507 | 1.38 | 0.041 |
| 1429194_at   | tigger transposable element derived 2                                         | Tigd2         | -1.09 | 0.464 | -1.03 | 0.525 | 1.09  | 0.281 | 1.35  | 0.043 | 1.38 | 0.010 |
| 1417717_a_at | tyrosinase                                                                    | Tyr           | -1.5  | 0.012 | -1.14 | 0.365 | 1.17  | 0.740 | 1.02  | 0.964 | 1.38 | 0.047 |
| 1417088_at   | zinc finger protein 346                                                       | Zfp346        | -1.03 | 0.622 | 1.14  | 0.331 | 1.44  | 0.080 | 1.32  | 0.003 | 1.38 | 0.005 |
| 1451450_at   | RIKEN cDNA 2010011I20 gene                                                    | 2010011I20Rik | -1.18 | 0.028 | -1.15 | 0.204 | -1.27 | 0.039 | 1.14  | 0.247 | 1.39 | 0.003 |
| 1434175_s_at | RIKEN cDNA 2210010N04 gene                                                    | 2210010N04Rik | 1.15  | 0.072 | 1.15  | 0.267 | 1.14  | 0.520 | 1.05  | 0.879 | 1.39 | 0.038 |
| 1429073_at   | RIKEN cDNA 2210015D19 gene                                                    | 2210015D19Rik | -1    | 0.730 | 1.24  | 0.640 | 1.05  | 0.876 | 1.02  | 0.938 | 1.39 | 0.020 |
| 1455850_at   | RIKEN cDNA 2310003H01 gene                                                    | 2310003H01Rik | 1.16  | 0.444 | 1.61  | 0.075 | 1.08  | 0.869 | 1.26  | 0.016 | 1.39 | 0.031 |
| 1432509_at   | RIKEN cDNA 5033430I15 gene                                                    | 5033430I15Rik | 1.23  | 0.217 | 1.32  | 0.211 | 1.21  | 0.137 | 1.28  | 0.040 | 1.39 | 0.025 |
| 1431847_at   | RIKEN cDNA 5330439K02 gene                                                    | 5330439K02Rik | 1.15  | 0.579 | 1.25  | 0.294 | 1.1   | 0.577 | 1.29  | 0.735 | 1.39 | 0.042 |
| 1456181_at   | RIKEN cDNA 9530020G05 gene                                                    | 9530020G05Rik | -1.11 | 0.280 | 1.48  | 0.020 | 1.16  | 0.791 | 1.28  | 0.148 | 1.39 | 0.042 |
| 1429394_at   | RIKEN cDNA A130010J15 gene                                                    | A130010J15Rik | 1.04  | 0.566 | 1.27  | 0.052 | 1.03  | 0.870 | 1.02  | 0.986 | 1.39 | 0.004 |
| 1448199_at   | ankyrin repeat domain 10                                                      | Ankrd10       | -1.06 | 0.126 | 1.55  | 0.005 | 1.45  | 0.019 | 1.24  | 0.040 | 1.39 | 0.049 |
| 1450624_at   | betaine-homocysteine methyltransferase                                        | Bhmt          | -1.01 | 0.362 | -1.66 | 0.147 | 3.04  | 0.201 | 1.15  | 0.555 | 1.39 | 0.049 |
| 1437210_a_at | bromodomain containing 2                                                      | Brd2          | -1.06 | 0.299 | 1.16  | 0.120 | 1.07  | 0.706 | 1.34  | 0.002 | 1.39 | 0.039 |
| 1456609_at   | calcium/calmodulin-dependent protein kinase II inhibitor 1                    | Camk2n1       | -1.12 | 0.293 | 1.06  | 0.573 | 1.2   | 0.140 | 1.04  | 0.308 | 1.39 | 0.047 |
| 1422535_at   | cyclin E2                                                                     | Ccne2         | 1.07  | 0.667 | 1.54  | 0.097 | 1.26  | 0.060 | 1.38  | 0.043 | 1.39 | 0.029 |
| 1427088_at   | cyclin T2                                                                     | Ccnt2         | -1.22 | 0.057 | 1.07  | 0.979 | 1.22  | 0.048 | 1.57  | 0.014 | 1.39 | 0.024 |
| 1437399_at   | claudin domain containing 1                                                   | Cldnd1        | -1.35 | 0.348 | -1.2  | 0.411 | 1.51  | 0.274 | -1.17 | 0.108 | 1.39 | 0.017 |
| 1417441_at   | DnaJ (Hsp40) homolog, subfamily C, member 12                                  | Dnajc12       | -1.02 | 0.796 | -1.01 | 0.994 | 1.44  | 0.047 | -1.03 | 0.586 | 1.39 | 0.039 |
| 1435631_x_at | exocyst complex component 6                                                   | Exoc6         | -1.11 | 0.423 | 1.18  | 0.525 | 1.19  | 0.707 | 1.05  | 0.951 | 1.39 | 0.043 |
| 1437284_at   | frizzled homolog 1 (Drosophila)                                               | Fzd1          | 1.03  | 0.393 | 1.27  | 0.017 | 1.34  | 0.060 | 1.23  | 0.012 | 1.39 | 0.042 |
| 1433622_at   | gem (nuclear organelle) associated protein 4                                  | Gemin4        | 1.82  | 0.236 | 2.11  | 0.013 | 1.24  | 0.013 | 1.35  | 0.009 | 1.39 | 0.005 |
| 1442614_at   | interleukin 1 receptor accessory protein                                      | Il1rap        | 1.14  | 0.490 | 1.38  | 0.025 | 1.24  | 0.584 | -1.43 | 0.199 | 1.39 | 0.012 |
| 1459983_at   | inositol (myo)-1(or 4)-monophosphatase 2                                      | Impa2         | 1.02  | 0.983 | -1.68 | 0.167 | 1.32  | 0.204 | 1.12  | 0.801 | 1.39 | 0.040 |
| 1415972_at   | myristoylated alanine rich protein kinase C substrate                         | Marcks        | 1.1   | 0.408 | 1.31  | 0.043 | 1.35  | 0.106 | 1.11  | 0.184 | 1.39 | 0.034 |
| 1418464_at   | matrilin 4                                                                    | Matn4         | 1.76  | 0.639 | 1.16  | 0.595 | 1.32  | 0.929 | 1.37  | 0.836 | 1.39 | 0.012 |
| 1455787_x_at | multiple inositol polyphosphate histidine phosphatase 1                       | Minpp1        | -1.3  | 0.354 | -1.13 | 0.500 | 1.08  | 0.631 | -1.11 | 0.307 | 1.39 | 0.018 |
| 1426950_at   | poly (ADP-ribose) polymerase family, member 16                                | Parp16        | 1.18  | 0.831 | 1.68  | 0.254 | 1.69  | 0.266 | 1.34  | 0.142 | 1.39 | 0.047 |
| 1450259_a_at | signal transducer and activator of transcription 5A                           | Stat5a        | 1.67  | 0.404 | 1.83  | 0.044 | 1.23  | 0.147 | 1.22  | 0.085 | 1.39 | 0.004 |
| 1438952_x_at | TAR (HIV) RNA binding protein 2                                               | Tarbp2        | -1.35 | 0.313 | 1.02  | 0.549 | 1.04  | 0.891 | 1.26  | 0.383 | 1.39 | 0.033 |
| 1433530_at   | RIKEN cDNA 2210411K19 gene                                                    | 2210411K19Rik | -1.15 | 0.430 | 1.07  | 0.662 | 1.17  | 0.656 | -1.02 | 0.639 | 1.4  | 0.031 |
| 1439387_x_at | RIKEN cDNA 2310061F22 gene                                                    | 2310061F22Rik | -1.22 | 0.414 | -1.03 | 0.567 | 1.14  | 0.204 | 1.07  | 0.449 | 1.4  | 0.002 |
| 1451568_at   | RIKEN cDNA A630054L15 gene                                                    | A630054L15Rik | -1.23 | 0.296 | -1.53 | 0.064 | -1.38 | 0.034 | 1.03  | 0.988 | 1.4  | 0.025 |
| 1427081_at   | RIKEN cDNA A630072M18 gene                                                    | A630072M18Rik | 1.37  | 0.028 | 1.72  | 0.008 | 1.41  | 0.185 | 1.17  | 0.040 | 1.4  | 0.031 |
| 1417208_at   | alpha-methylacyl-CoA racemase                                                 | Amacr         | -1.01 | 0.593 | 1.21  | 0.900 | 1.26  | 0.101 | 1.1   | 0.012 | 1.4  | 0.005 |
| 1417419_at   | cyclin D1                                                                     | Ccnd1         | -1.01 | 0.676 | 1.06  | 0.322 | 1.07  | 0.181 | -1    | 0.937 | 1.4  | 0.036 |
| 1418585_at   | cyclin H                                                                      | Ccnh          | 1.28  | 0.019 | 1.26  | 0.143 | 1.24  | 0.037 | 1.16  | 0.189 | 1.4  | 0.048 |
| 1421373_at   | cytochrome c oxidase subunit IV isoform 2                                     | Cox4i2        | -1.05 | 0.612 | -1.46 | 0.057 | 1.07  | 0.759 | 1.02  | 0.842 | 1.4  | 0.006 |
| 1434747_at   | chymotrypsin C (caldecrin)                                                    | Ctrc          | -1.61 | 0.198 | -1.19 | 0.172 | -1.18 | 0.232 | 1.62  | 0.471 | 1.4  | 0.020 |
| 1452796_at   | differentially expressed in FDCP 6                                            | Def6          | 1.45  | 0.151 | 1.87  | 0.024 | 1.22  | 0.002 | 1.24  | 0.012 | 1.4  | 0.012 |



|              |                                                                                                          |               |       |       |       |       |       |       |       |       |      |       |
|--------------|----------------------------------------------------------------------------------------------------------|---------------|-------|-------|-------|-------|-------|-------|-------|-------|------|-------|
| 1454219_at   | DnaJ (Hsp40) homolog, subfamily C, member 2                                                              | Dnajc2        | 1.21  | 0.505 | 1.29  | 0.725 | 1.36  | 0.681 | 1.19  | 0.398 | 1.4  | 0.036 |
| 1452388_at   | heat shock protein 1A                                                                                    | Hspa1a        | 1.05  | 0.910 | 1.24  | 0.662 | 1.17  | 0.147 | 1.17  | 0.214 | 1.4  | 0.008 |
| 1459292_at   | Mitogen activated protein kinase kinase 6                                                                | Map2k6        | -1.24 | 0.379 | 1.62  | 0.810 | 1.88  | 0.903 | 1.54  | 0.354 | 1.4  | 0.017 |
| 1428712_at   | MON1 homolog b (yeast)                                                                                   | Mon1b         | -1.01 | 0.653 | 1.06  | 0.724 | 1.26  | 0.873 | 1.61  | 0.380 | 1.4  | 0.014 |
| 1416915_at   | mutS homolog 6 (E. coli)                                                                                 | Msh6          | 1.1   | 0.060 | 2.15  | 0.000 | 1.51  | 0.047 | 1.47  | 0.029 | 1.4  | 0.023 |
| 1437834_s_at | protein kinase C and casein kinase substrate in neurons 3                                                | Pacsin3       | -1.03 | 0.510 | 1.01  | 0.554 | 1.22  | 0.025 | 1.14  | 0.201 | 1.4  | 0.008 |
| 1417169_at   | ubiquitin specific peptidase 2                                                                           | Usp2          | 1.2   | 0.876 | 1.24  | 0.954 | 1.33  | 0.095 | 1.49  | 0.014 | 1.4  | 0.029 |
| 1421478_a_at | zinc finger protein 318                                                                                  | Zfp318        | -1.83 | 0.090 | 1.05  | 0.736 | 1.11  | 0.252 | 1.54  | 0.015 | 1.4  | 0.048 |
| 1454258_at   | RIKEN cDNA 1110008E08 gene                                                                               | 1110008E08Rik | -1.14 | 0.373 | -1.81 | 0.093 | -1.12 | 0.523 | 1.1   | 0.592 | 1.41 | 0.018 |
| 1428550_at   | RIKEN cDNA 1810015A11 gene                                                                               | 1810015A11Rik | 1.06  | 0.364 | 1.27  | 0.025 | 1.34  | 0.004 | 1.43  | 0.017 | 1.41 | 0.040 |
| 1448552_s_at | RIKEN cDNA 2310028N02 gene                                                                               | 2310028N02Rik | -1.1  | 0.302 | 1.16  | 0.369 | -1.04 | 0.503 | 1.12  | 0.246 | 1.41 | 0.007 |
| 1454736_at   | ankyrin repeat domain 57                                                                                 | Ankrd57       | 1.06  | 0.862 | 1.27  | 0.133 | 1.22  | 0.081 | 1.35  | 0.001 | 1.41 | 0.017 |
| 1418653_at   | cytochrome P450, family 2, subfamily c, polypeptide 37 /// cytochrome P4E Cyp2c37 /// Cyp2c              | Cyp2c37       | 1.48  | 0.982 | 2.15  | 0.336 | 2.09  | 0.263 | -1    | 0.481 | 1.41 | 0.041 |
| 1425937_a_at | hexamethylene bis-acetamide inducible 1                                                                  | Hexim1        | 1.05  | 0.729 | 1.52  | 0.009 | 1.39  | 0.015 | 1.49  | 0.002 | 1.41 | 0.015 |
| 1425322_at   | interferon zeta /// similar to interferon zeta /// similar to interferon zeta /// sif lfnz /// LOC435791 | LOC435791     | -1.09 | 0.518 | 1.41  | 0.163 | 1.43  | 0.015 | 1.25  | 0.056 | 1.41 | 0.016 |
| 1428532_at   | integrator complex subunit 7                                                                             | Ints7         | 1.37  | 0.386 | 1.42  | 0.049 | 1.49  | 0.045 | 1.11  | 0.424 | 1.41 | 0.030 |
| 1451199_at   | queuine tRNA-ribosyltransferase domain containing 1                                                      | Qtrtd1        | -1.25 | 0.321 | 1.08  | 0.960 | 1.3   | 0.032 | 1.13  | 0.035 | 1.41 | 0.005 |
| 1422629_s_at | shroom family member 3                                                                                   | Shroom3       | -1.12 | 0.416 | -1.13 | 0.333 | 1.23  | 0.592 | -1.07 | 0.311 | 1.41 | 0.000 |
| 1437190_at   | serine/threonine/tyrosine kinase 1                                                                       | Styk1         | 1.33  | 0.135 | 1.36  | 0.204 | 1.32  | 0.916 | 1.26  | 0.578 | 1.41 | 0.007 |
| 1420043_s_at | THO complex 1                                                                                            | Thoc1         | -1.14 | 0.370 | 1.29  | 0.591 | 1.22  | 0.264 | -1.22 | 0.020 | 1.41 | 0.020 |
| 1451268_at   | translocation associated membrane protein 1-like 1                                                       | Tram1l1       | 1.21  | 0.752 | 1.81  | 0.059 | 1.38  | 0.012 | 1.26  | 0.180 | 1.41 | 0.027 |
| 1423923_a_at | WD repeat domain 8                                                                                       | Wdr8          | -1.02 | 0.584 | 1.27  | 0.907 | 1.14  | 0.238 | 1.12  | 0.112 | 1.41 | 0.005 |
| 1449391_at   | zinc finger protein 37                                                                                   | Zfp37         | 1.6   | 0.298 | 1.66  | 0.042 | 1.51  | 0.276 | 1.34  | 0.002 | 1.41 | 0.024 |
| 1424261_at   | zinc finger protein 672                                                                                  | Zfp672        | 1.64  | 0.729 | 1.81  | 0.117 | 1.17  | 0.052 | 1.29  | 0.004 | 1.41 | 0.026 |
| 1451189_at   | zinc finger, SWIM domain containing 1                                                                    | Zswim1        | 1.12  | 0.522 | 1.45  | 0.012 | 1.12  | 0.044 | 1.35  | 0.015 | 1.41 | 0.045 |
| 1455581_x_at | hypothetical protein 9530028C05                                                                          | 9530028C05    | -1.18 | 0.423 | -1.15 | 0.392 | 1.09  | 0.400 | 1.26  | 0.313 | 1.42 | 0.031 |
| 1442007_at   | RIKEN cDNA 9830124H08 gene                                                                               | 9830124H08Rik | 1.03  | 0.648 | 1.18  | 0.866 | 1.17  | 0.080 | 1.33  | 0.042 | 1.42 | 0.046 |
| 1451123_at   | RIKEN cDNA C330016O10 gene                                                                               | C330016O10Rik | 1.66  | 0.234 | -1.36 | 0.401 | -1.46 | 0.305 | 1.4   | 0.910 | 1.42 | 0.033 |
| 1436034_at   | centrosomal protein 68                                                                                   | Cep68         | -1.06 | 0.565 | 1.01  | 0.995 | 1.14  | 0.451 | 1.26  | 0.024 | 1.42 | 0.003 |
| 1430520_at   | copine VIII                                                                                              | Cpne8         | 1.71  | 0.304 | 1.66  | 0.036 | 1.17  | 0.516 | 1.01  | 0.927 | 1.42 | 0.019 |
| 1439429_x_at | deltex 2 homolog (Drosophila)                                                                            | Dtx2          | 1.02  | 0.595 | 1.18  | 0.781 | 1.27  | 0.214 | 1.11  | 0.381 | 1.42 | 0.015 |
| 1457730_at   | Fanconi anemia, complementation group M                                                                  | Fancm         | 1.01  | 0.609 | 1.24  | 0.761 | -1.18 | 0.429 | 1.19  | 0.212 | 1.42 | 0.032 |
| 1435176_a_at | inhibitor of DNA binding 2                                                                               | Id2           | -1.06 | 0.725 | 1.12  | 0.673 | 1.31  | 0.184 | 1.17  | 0.032 | 1.42 | 0.007 |
| 1423229_at   | inositol polyphosphate-5-phosphatase E                                                                   | Inpp5e        | 3.39  | 0.335 | 3.83  | 0.019 | 1.17  | 0.549 | 1.41  | 0.061 | 1.42 | 0.002 |
| 1417973_at   | inter-alpha trypsin inhibitor, heavy chain 1                                                             | Itih1         | -1.03 | 0.663 | 1.05  | 0.817 | 1.26  | 0.450 | 1.26  | 0.571 | 1.42 | 0.010 |
| 1451219_at   | ORM1-like 1 (S. cerevisiae)                                                                              | Ormdl1        | 1.05  | 0.799 | 1.26  | 0.219 | 1.1   | 0.436 | 1.09  | 0.565 | 1.42 | 0.000 |
| 1428037_at   | otoancorin                                                                                               | Otoa          | -1.13 | 0.503 | -1.01 | 0.858 | -1.06 | 0.434 | 1.39  | 0.954 | 1.42 | 0.006 |
| 1416206_at   | signal-induced proliferation associated gene 1                                                           | Sipa1         | 1.35  | 0.412 | 1.59  | 0.219 | 1.15  | 0.545 | 1.08  | 0.856 | 1.42 | 0.046 |
| 1452789_at   | stannin                                                                                                  | Snn           | 1.05  | 0.805 | 1.5   | 0.010 | 1.2   | 0.229 | 1.28  | 0.002 | 1.42 | 0.012 |
| 1451339_at   | sulfite oxidase                                                                                          | Suox          | 5.26  | 0.543 | 8.31  | 0.070 | 1.38  | 0.039 | 1.26  | 0.024 | 1.42 | 0.004 |
| 1459510_at   | transmembrane protease, serine 2                                                                         | Tmprss2       | 1.04  | 0.863 | 1.59  | 0.193 | 1.61  | 0.290 | 1.25  | 0.370 | 1.42 | 0.015 |
| 1453141_at   | RIKEN cDNA 0610009L18 gene                                                                               | 0610009L18Rik | -1.09 | 0.469 | 1.26  | 0.889 | 1.13  | 0.884 | 1.2   | 0.235 | 1.43 | 0.017 |
| 1434532_at   | cDNA sequence BC035295                                                                                   | BC035295      | -1.07 | 0.499 | 1.44  | 0.752 | 1.31  | 0.000 | 1.37  | 0.013 | 1.43 | 0.002 |
| 1446516_at   | B-cell CLL/lymphoma 7C                                                                                   | Bcl7c         | -1.1  | 0.701 | -1.26 | 0.065 | 1.13  | 0.784 | -1.15 | 0.105 | 1.43 | 0.005 |
| 1438317_a_at | endonuclease G                                                                                           | Endog         | -1.1  | 0.435 | 1.03  | 0.493 | 1.04  | 0.675 | 1.05  | 0.538 | 1.43 | 0.027 |
| 1416969_at   | G two S phase expressed protein 1                                                                        | Gtse1         | 1.23  | 0.069 | 1.83  | 0.000 | 1.19  | 0.188 | 1.17  | 0.038 | 1.43 | 0.030 |
| 1452798_s_at | mitogen activated protein kinase 1 interacting protein 1                                                 | Mapk1ip1      | -1.1  | 0.447 | -1.02 | 0.617 | 1.2   | 0.413 | 1.11  | 0.800 | 1.43 | 0.008 |
| 1436309_at   | neuropilin (NRP) and tolloid (TLL)-like 2                                                                | Neto2         | 1.5   | 0.058 | 1.59  | 0.321 | 1.28  | 0.586 | 1.35  | 0.453 | 1.43 | 0.027 |
| 1448815_at   | 8-oxoguanine DNA-glycosylase 1                                                                           | Ogg1          | 1.21  | 0.152 | 1.37  | 0.312 | 1.05  | 0.834 | 1.14  | 0.103 | 1.43 | 0.026 |
| 1447810_x_at | pleckstrin homology domain containing, family B (evectins) member 2                                      | Plekhb2       | 1.05  | 0.471 | -1.28 | 0.319 | 1.3   | 0.792 | 1.61  | 0.970 | 1.43 | 0.039 |
| 1448369_at   | polymerase (DNA directed), alpha 2                                                                       | Pola2         | 1.51  | 0.175 | 1.51  | 0.024 | 1.47  | 0.007 | 1.39  | 0.160 | 1.43 | 0.030 |
| 1456729_x_at | regulator of telomere elongation helicase 1                                                              | Rtel1         | 1     | 0.535 | 1.72  | 0.974 | -1.67 | 0.057 | 1.06  | 0.850 | 1.43 | 0.023 |
| 1439536_at   | Solute carrier family 13 (sodium-dependent citrate transporter), member 5                                | Slc13a5       | -1.14 | 0.433 | -1.26 | 0.263 | 1.23  | 0.148 | -1.09 | 0.396 | 1.43 | 0.030 |
| 1450681_at   | zinc finger protein 143                                                                                  | Zfp143        | 1.86  | 0.233 | 1.74  | 0.116 | 1.42  | 0.582 | 1.1   | 0.179 | 1.43 | 0.044 |
| 1455633_at   | zinc finger protein 647                                                                                  | Zfp647        | -1.08 | 0.542 | 1.08  | 0.927 | 1.15  | 0.038 | 1.28  | 0.017 | 1.43 | 0.049 |
| 1441876_x_at | Zinc finger protein 93                                                                                   | Zfp93         | 1.1   | 0.674 | 1.81  | 0.150 | 1.06  | 0.686 | 1.03  | 0.856 | 1.43 | 0.042 |
| 1428832_at   | RIKEN cDNA 1600002H07 gene                                                                               | 1600002H07Rik | 1.07  | 0.550 | 1.53  | 0.024 | 1.37  | 0.141 | 1.18  | 0.330 | 1.44 | 0.039 |
| 1459992_x_at | ceroid-lipofuscinosis, neuronal 8                                                                        | Cln8          | -1.3  | 0.168 | 1.18  | 0.309 | -1.07 | 0.631 | 1.09  | 0.638 | 1.44 | 0.003 |

|              |                                                                        |                    |       |       |       |       |       |       |       |       |      |       |
|--------------|------------------------------------------------------------------------|--------------------|-------|-------|-------|-------|-------|-------|-------|-------|------|-------|
| 1459757_x_at | CCR4-NOT transcription complex, subunit 10                             | Cnot10             | -1.36 | 0.348 | -1.68 | 0.207 | 1.19  | 0.031 | -1.02 | 0.730 | 1.44 | 0.043 |
| 1452792_at   | DAZ interacting protein 1                                              | Dzip1              | 1.16  | 0.692 | 1.41  | 0.121 | 1.6   | 0.024 | 1.09  | 0.231 | 1.44 | 0.041 |
| 1417383_at   | ectonucleoside triphosphate diphosphohydrolase 5                       | Entpd5             | 1.47  | 0.859 | 1.43  | 0.928 | 1.17  | 0.404 | 1.18  | 0.683 | 1.44 | 0.020 |
| 1454078_a_at | galactose-3-O-sulfotransferase 1                                       | Gal3st1            | -1.16 | 0.437 | -1.01 | 0.617 | 1.04  | 0.805 | -1.13 | 0.261 | 1.44 | 0.014 |
| 1453995_a_at | Hpal1 tiny fragments locus 9c                                          | Htf9c              | 1.55  | 0.115 | 1.78  | 0.054 | 1.23  | 0.425 | 1.47  | 0.042 | 1.44 | 0.036 |
| 1427719_s_at | keratin complex 2, basic, pseudogene 1 /// keratin 82                  | Krt2-ps1 /// Krt82 | 1.1   | 0.727 | 2.42  | 0.143 | 1.32  | 0.854 | 1.29  | 0.117 | 1.44 | 0.044 |
| 1417572_at   | N-methylpurine-DNA glycosylase                                         | Mpg                | 1.86  | 0.655 | 2.7   | 0.008 | 1.51  | 0.101 | 1.15  | 0.062 | 1.44 | 0.043 |
| 1451106_at   | RNA binding motif protein 21                                           | Rbm21              | 1.18  | 0.165 | 1.55  | 0.028 | 1.17  | 0.242 | 1.35  | 0.014 | 1.44 | 0.023 |
| 1436804_s_at | SCY1-like 1 (S. cerevisiae)                                            | Scyl1              | -1.05 | 0.542 | 1.04  | 0.505 | 1.42  | 0.272 | 1.01  | 0.960 | 1.44 | 0.049 |
| 1455863_at   | spermatogenesis associated 5-like 1                                    | Spata5l1           | -1.12 | 0.296 | 1.06  | 0.778 | 1.33  | 0.577 | 1.2   | 0.162 | 1.44 | 0.039 |
| 1454649_at   | steroid 5 alpha-reductase 1                                            | Srd5a1             | -1.11 | 0.283 | -1.37 | 0.087 | -1.03 | 0.675 | 2.08  | 0.044 | 1.44 | 0.001 |
| 1457968_at   | Transmembrane protein 23                                               | Tmem23             | 1.26  | 0.669 | 1.86  | 0.055 | -1.39 | 0.329 | -1.04 | 0.564 | 1.44 | 0.014 |
| 1429896_at   | RIKEN cDNA 5830408B19 gene                                             | 5830408B19Rik      | 1.47  | 0.217 | 1.43  | 0.539 | 1.05  | 0.929 | 1.24  | 0.057 | 1.45 | 0.040 |
| 1435685_x_at | ATP-binding cassette, sub-family C (CFTR/MRP), member 5                | Abcc5              | 1.27  | 0.592 | -1.29 | 0.715 | 1.85  | 0.264 | -1.1  | 0.049 | 1.45 | 0.024 |
| 1419011_at   | crystallin, beta A2                                                    | Cryba2             | 1.19  | 0.771 | 1.05  | 0.621 | 1.06  | 0.854 | 1.06  | 0.998 | 1.45 | 0.027 |
| 1454737_at   | dual specificity phosphatase 9                                         | Dusp9              | 1.03  | 0.928 | 1.58  | 0.049 | 1.37  | 0.022 | 1.24  | 0.014 | 1.45 | 0.045 |
| 1437356_at   | Epstein-Barr virus induced gene 2                                      | Ebi2               | 1.65  | 0.671 | 1.74  | 0.755 | -1.03 | 0.588 | 1.64  | 0.413 | 1.45 | 0.037 |
| 1455877_a_at | nanos homolog 1 (Drosophila)                                           | Nanos1             | -1.09 | 0.434 | 1.42  | 0.682 | 1.48  | 0.048 | 1.25  | 0.163 | 1.45 | 0.043 |
| 1427929_a_at | pyridoxal (pyridoxine, vitamin B6) kinase                              | Pdkk               | -1.26 | 0.343 | -1.02 | 0.575 | 1.3   | 0.010 | 1.19  | 0.064 | 1.45 | 0.024 |
| 1453739_at   | transmembrane protein 126B                                             | Tmem126b           | 1.8   | 0.254 | 2.22  | 0.048 | 1.41  | 0.038 | 1.44  | 0.298 | 1.45 | 0.035 |
| 1449367_at   | three prime repair exonuclease 2                                       | Trex2              | 1.33  | 0.932 | -1.06 | 0.477 | 1.39  | 0.876 | -1.32 | 0.363 | 1.45 | 0.048 |
| 1419239_at   | zinc finger protein 54                                                 | Zfp54              | 1.23  | 0.753 | 1.56  | 0.228 | 1.23  | 0.133 | 1.24  | 0.134 | 1.45 | 0.028 |
| 1429074_at   | RIKEN cDNA 1700026D08 gene                                             | 1700026D08Rik      | 1.06  | 0.822 | 1.56  | 0.226 | 1.13  | 0.999 | 1.03  | 0.956 | 1.46 | 0.047 |
| 1454355_at   | RIKEN cDNA 1810021M19 gene                                             | 1810021M19Rik      | -1.31 | 0.115 | -1.59 | 0.080 | 1.37  | 0.090 | -1.09 | 0.459 | 1.46 | 0.035 |
| 1432402_at   | RIKEN cDNA 4930402F11 gene                                             | 4930402F11Rik      | 1.33  | 0.745 | 1.2   | 0.596 | -1.11 | 0.524 | 2.42  | 0.540 | 1.46 | 0.013 |
| 1438125_at   | RIKEN cDNA C230085N15 gene                                             | C230085N15Rik      | 1.22  | 0.727 | 1.94  | 0.268 | 1.21  | 0.556 | 1.25  | 0.794 | 1.46 | 0.011 |
| 1441465_at   | CCR4-NOT transcription complex, subunit 3                              | Cnot3              | 1.37  | 0.171 | 1.28  | 0.547 | 1.21  | 0.394 | 1.1   | 0.239 | 1.46 | 0.026 |
| 1433044_at   | chondroitin sulfate proteoglycan 2                                     | Cspg2              | -1.06 | 0.783 | 2.18  | 0.101 | 1.05  | 0.874 | -1.1  | 0.568 | 1.46 | 0.001 |
| 1437512_x_at | EBNA1 binding protein 2                                                | Ebna1bp2           | 1.23  | 0.656 | -1.15 | 0.171 | 1.03  | 0.913 | 1.09  | 0.975 | 1.46 | 0.018 |
| 1436270_at   | gene model 740, (NCBI)                                                 | Gm740              | 1.12  | 0.105 | 1.31  | 0.024 | 1.22  | 0.188 | 1.13  | 0.018 | 1.46 | 0.004 |
| 1451021_a_at | Kruppel-like factor 5                                                  | Klf5               | 1.84  | 0.399 | 2.3   | 0.093 | 1.21  | 0.120 | 1.27  | 0.033 | 1.46 | 0.001 |
| 1447739_x_at | kelch domain containing 4 /// hypothetical gene supported by NM_145605 | Klhdc4 /// LOC384  | -1.02 | 0.414 | -1.02 | 0.484 | 1.46  | 0.564 | 1.03  | 0.934 | 1.46 | 0.044 |
| 1424906_at   | PQ loop repeat containing                                              | Pqlc3              | 2.88  | 0.360 | 4.08  | 0.081 | 1.43  | 0.145 | 1.37  | 0.021 | 1.46 | 0.018 |
| 1426444_at   | rhomboid domain containing 2                                           | Rhbdd2             | 2.06  | 0.196 | 1.34  | 0.914 | -1.2  | 0.205 | 1.1   | 0.697 | 1.46 | 0.000 |
| 1449946_a_at | zinc finger protein 593                                                | Zfp593             | -1.16 | 0.204 | 1.13  | 0.706 | 1.05  | 0.952 | 1.35  | 0.089 | 1.46 | 0.013 |
| 1424692_at   | RIKEN cDNA 2810055F11 gene                                             | 2810055F11Rik      | 1.53  | 0.251 | 1.83  | 0.018 | 1.25  | 0.007 | 1.3   | 0.039 | 1.47 | 0.008 |
| 1452236_at   | ATP-binding cassette, sub-family F (GCN20), member 1                   | Abcf1              | -1.23 | 0.347 | 1.04  | 0.705 | -1.12 | 0.443 | -1.1  | 0.209 | 1.47 | 0.016 |
| 1441387_at   | cDNA sequence BC030343                                                 | BC030343           | 1.02  | 0.728 | 1.06  | 0.622 | 1.05  | 0.987 | 1.17  | 0.957 | 1.47 | 0.046 |
| 1447984_at   | DNA segment, Chr 1, ERATO Doi 75, expressed                            | D1Erd75e           | -1.48 | 0.164 | -2.28 | 0.061 | 1.42  | 0.959 | 1.16  | 0.119 | 1.47 | 0.039 |
| 1449701_at   | DNA segment, Chr 6, ERATO Doi 109, expressed                           | D6Erd109e          | 1.69  | 0.441 | 1.69  | 0.456 | -1.03 | 0.603 | -1.11 | 0.479 | 1.47 | 0.044 |
| 1424171_a_at | hydroxyacyl glutathione hydrolase                                      | Hagh               | -1.1  | 0.395 | 1.08  | 0.788 | -1    | 0.784 | 1.11  | 0.722 | 1.47 | 0.021 |
| 1424859_at   | homer homolog 3 (Drosophila)                                           | Homer3             | 1.23  | 0.646 | 1.43  | 0.396 | 1.63  | 0.130 | 1.33  | 0.266 | 1.47 | 0.040 |
| 1418300_a_at | MAP kinase-interacting serine/threonine kinase 2                       | Mknk2              | -1.05 | 0.558 | 1.27  | 0.104 | 1.19  | 0.057 | 1.25  | 0.007 | 1.47 | 0.020 |
| 1418500_at   | nucleosome assembly protein 1-like 3                                   | Nap1l3             | 2.53  | 0.207 | 2.74  | 0.054 | 1.37  | 0.953 | 1.23  | 0.172 | 1.47 | 0.025 |
| 1449249_at   | protocadherin 7                                                        | Pcdh7              | 1.98  | 0.186 | 2.87  | 0.138 | 1.27  | 0.067 | 1.07  | 0.182 | 1.47 | 0.004 |
| 1452458_s_at | peptidylprolyl isomerase (cyclophilin) like 5                          | Ppil5              | -1.02 | 0.688 | 1.23  | 0.771 | 1.56  | 0.028 | 1.35  | 0.073 | 1.47 | 0.019 |
| 1426046_a_at | Rab geranylgeranyl transferase, a subunit                              | Rabggta            | 1.17  | 0.546 | 1.25  | 0.161 | -1.01 | 0.875 | 1.1   | 0.274 | 1.47 | 0.034 |
| 1453278_a_at | restin-like 2                                                          | Rsln2              | 1.01  | 0.824 | -1.23 | 0.122 | 1.62  | 0.346 | 1.27  | 0.751 | 1.47 | 0.004 |
| 1455511_at   | selenophosphate synthetase 1                                           | Sephs1             | 1.09  | 0.608 | 1.47  | 0.128 | 1.87  | 0.074 | 1.32  | 0.001 | 1.47 | 0.038 |
| 1435278_at   | SFT2 domain containing 3                                               | Sft2d3             | 1.07  | 0.453 | -1.36 | 0.138 | -1.01 | 0.887 | 1.02  | 0.816 | 1.47 | 0.004 |
| 1428093_at   | TraB domain containing                                                 | Trabd              | -1.01 | 0.640 | -1.05 | 0.539 | 1     | 0.867 | 1.2   | 0.081 | 1.47 | 0.038 |
| 1422532_at   | xeroderma pigmentosum, complementation group C                         | Xpc                | 1.33  | 0.130 | 1.42  | 0.018 | 1.1   | 0.101 | 1.23  | 0.191 | 1.47 | 0.047 |
| 1424892_at   | zinc finger protein 95                                                 | Zfp95              | 1.17  | 0.399 | 1.53  | 0.031 | 1.25  | 0.032 | 1.2   | 0.031 | 1.47 | 0.023 |
| 1434240_at   | RIKEN cDNA 4632434I11 gene                                             | 4632434I11Rik      | 1.32  | 0.450 | 2.03  | 0.140 | 1.64  | 0.019 | 1.45  | 0.051 | 1.48 | 0.005 |
| 1453591_at   | RIKEN cDNA 5730437N04 gene                                             | 5730437N04Rik      | 1.09  | 0.795 | 1.12  | 0.836 | -1.08 | 0.378 | -1.12 | 0.202 | 1.48 | 0.001 |
| 1436422_at   | cDNA sequence BC026590                                                 | BC026590           | 1.33  | 0.507 | 1.82  | 0.058 | 1.35  | 0.019 | 1.29  | 0.003 | 1.48 | 0.005 |
| 1448659_at   | caspase 7                                                              | Casp7              | 1.43  | 0.666 | 1.93  | 0.138 | 1.41  | 0.078 | 1.09  | 0.202 | 1.48 | 0.002 |
| 1421986_at   | eukaryotic translation initiation factor 4E member 2                   | Eif4e2             | -1.45 | 0.190 | 1.08  | 0.902 | -1.16 | 0.262 | 1.04  | 0.947 | 1.48 | 0.044 |

|              |                                                                                                                              |                    |       |       |       |       |       |       |       |       |      |       |
|--------------|------------------------------------------------------------------------------------------------------------------------------|--------------------|-------|-------|-------|-------|-------|-------|-------|-------|------|-------|
| 1421969_a_at | fatty acid amide hydrolase                                                                                                   | Faah               | 1.32  | 0.776 | -1.32 | 0.310 | -1.34 | 0.189 | 1.26  | 0.468 | 1.48 | 0.042 |
| 1448679_at   | hyaluronoglucosaminidase 2                                                                                                   | Hyal2              | -1.15 | 0.045 | 1.08  | 0.095 | 1.08  | 0.744 | 1.22  | 0.045 | 1.48 | 0.016 |
| 1426988_at   | kelch domain containing 5                                                                                                    | Klhdc5             | 3.69  | 0.376 | 3.44  | 0.015 | 1.28  | 0.000 | 1.25  | 0.134 | 1.48 | 0.012 |
| 1424336_at   | phosphopantothenoylcysteine decarboxylase                                                                                    | Ppcdc              | 1.43  | 0.628 | -1.01 | 0.267 | 1.08  | 0.756 | 1.39  | 0.042 | 1.48 | 0.011 |
| 1430527_a_at | ring finger protein 167                                                                                                      | Rnf167             | 3.51  | 0.621 | 6.62  | 0.221 | 1.51  | 0.097 | 1.13  | 0.549 | 1.48 | 0.015 |
| 1425277_at   | slit homolog 1 (Drosophila)                                                                                                  | Slit1              | -1.45 | 0.192 | 1.49  | 0.956 | 1.8   | 0.229 | 1.17  | 0.678 | 1.48 | 0.023 |
| 1421528_a_at | surfeit gene 5                                                                                                               | Surf5              | 1.03  | 0.625 | 1.42  | 0.007 | 1.34  | 0.007 | 1.3   | 0.009 | 1.48 | 0.025 |
| 1431112_at   | unc-51-like kinase 3 (C. elegans)                                                                                            | Ulk3               | -1.14 | 0.432 | -1.08 | 0.359 | 1.08  | 0.399 | 1.07  | 0.614 | 1.48 | 0.036 |
| 1421131_a_at | zinc finger protein 111                                                                                                      | Zfp111             | 1.07  | 0.795 | 1.79  | 0.002 | 1.13  | 0.235 | 1.08  | 0.939 | 1.48 | 0.035 |
| 1433583_at   | zinc finger protein 365 // similar to zinc finger protein 365                                                                | Zfp365 // LOC674   | 2.05  | 0.133 | 3.74  | 0.010 | 1.29  | 0.261 | 1.15  | 0.054 | 1.48 | 0.028 |
| 1454825_at   | RIKEN cDNA 1110014N23 gene                                                                                                   | 1110014N23Rik      | -1.14 | 0.383 | 1.01  | 0.650 | 1.15  | 0.047 | 1.01  | 0.711 | 1.49 | 0.018 |
| 1459327_at   | RIKEN cDNA 4931406I20 gene                                                                                                   | 4931406I20Rik      | -1.23 | 0.164 | -1    | 0.865 | -1.03 | 0.702 | 1.25  | 0.302 | 1.49 | 0.025 |
| 1442168_at   | RIKEN cDNA A230071A22 gene                                                                                                   | A230071A22Rik      | 1.01  | 0.602 | -1.13 | 0.478 | 1.04  | 0.615 | -1.04 | 0.272 | 1.49 | 0.024 |
| 1447897_x_at | Anaphase promoting complex subunit 11 homolog (yeast)                                                                        | Anapc11            | -1.14 | 0.435 | -1.07 | 0.460 | 1.16  | 0.954 | 1.15  | 0.483 | 1.49 | 0.028 |
| 1458174_at   | coiled-coil domain containing 52                                                                                             | Ccdc52             | 2.78  | 0.191 | 2.53  | 0.234 | 2.11  | 0.021 | 2.11  | 0.962 | 1.49 | 0.046 |
| 1449954_at   | hyaluronoglucosaminidase 1 // N-acetyltransferase 6                                                                          | Hyal1 // Nat6      | 1.09  | 0.581 | 1.06  | 0.558 | 1.53  | 0.306 | 1.05  | 0.615 | 1.49 | 0.002 |
| 1421364_at   | leucine rich repeat and fibronectin type III domain containing 1                                                             | Lrrn1              | -1.34 | 0.170 | -1.24 | 0.281 | 1.3   | 0.357 | -1.37 | 0.090 | 1.49 | 0.006 |
| 1435666_at   | microtubule associated serine/threonine kinase 3                                                                             | Mast3              | 1.08  | 0.321 | 1.26  | 0.057 | 1.08  | 0.177 | 1.21  | 0.138 | 1.49 | 0.037 |
| 1459921_at   | neurexophilin 1                                                                                                              | Nxph1              | -1.04 | 0.418 | 1.17  | 0.340 | 1.89  | 0.232 | 2.72  | 0.138 | 1.49 | 0.019 |
| 1442237_at   | Sequestosome 1                                                                                                               | Sqstm1             | -1.34 | 0.093 | -1.24 | 0.044 | -1.13 | 0.464 | -1.05 | 0.499 | 1.49 | 0.029 |
| 1458667_at   | RIKEN cDNA 4930519N13 gene                                                                                                   | 4930519N13Rik      | -1.17 | 0.353 | 1.17  | 0.678 | 1.43  | 0.003 | 1.02  | 0.898 | 1.5  | 0.048 |
| 1432433_at   | RIKEN cDNA 4930524N10 gene                                                                                                   | 4930524N10Rik      | -1.06 | 0.512 | -1.12 | 0.482 | -1.5  | 0.340 | 1.4   | 0.391 | 1.5  | 0.007 |
| 1440480_at   | cDNA sequence AB182283                                                                                                       | AB182283           | 1.19  | 0.713 | -1.08 | 0.439 | -1.25 | 0.267 | 1.23  | 0.080 | 1.5  | 0.020 |
| 1419233_x_at | apolipoprotein A-I                                                                                                           | Apoa1              | 1.22  | 0.490 | -1.06 | 0.358 | -1.14 | 0.141 | 1.2   | 0.863 | 1.5  | 0.024 |
| 1457490_at   | RIKEN cDNA B230218L05 gene                                                                                                   | B230218L05Rik      | -1.3  | 0.360 | -1.34 | 0.344 | 2.2   | 0.674 | 1.16  | 0.393 | 1.5  | 0.012 |
| 1447965_at   | expressed sequence C80012                                                                                                    | C80012             | 1.24  | 0.762 | 1.25  | 0.447 | -1.04 | 0.673 | -1.16 | 0.266 | 1.5  | 0.017 |
| 1436619_at   | RIKEN cDNA D630045M09 gene                                                                                                   | D630045M09Rik      | 1.68  | 0.781 | 2.11  | 0.069 | 1.14  | 0.896 | 1.12  | 0.036 | 1.5  | 0.022 |
| 1451270_at   | dual specificity phosphatase 18                                                                                              | Dusp18             | 1.92  | 0.619 | 1.85  | 0.252 | 1.38  | 0.147 | 1.47  | 0.186 | 1.5  | 0.020 |
| 1438167_x_at | Folliculin                                                                                                                   | Ficn               | -1.37 | 0.305 | 1.01  | 0.670 | 1.08  | 0.141 | 1.11  | 0.245 | 1.5  | 0.010 |
| 1453102_at   | fibronectin leucine rich transmembrane protein 3                                                                             | Frlt3              | 1.6   | 0.437 | 2.79  | 0.025 | 1.33  | 0.001 | 1.31  | 0.032 | 1.5  | 0.013 |
| 1459689_at   | Glycerol phosphate dehydrogenase 2, mitochondrial                                                                            | Gpd2               | 1.39  | 0.788 | 1.1   | 0.775 | 2.19  | 0.249 | 2.18  | 0.332 | 1.5  | 0.048 |
| 1428800_a_at | pseudouridylyl synthase 7 homolog (S. cerevisiae)-like                                                                       | Pus7l              | -1.1  | 0.449 | 1.21  | 0.785 | 1.24  | 0.262 | 1.28  | 0.013 | 1.5  | 0.043 |
| 1419061_at   | ras homolog gene family, member D                                                                                            | Rhod               | 1.33  | 0.344 | 2.09  | 0.012 | 1.26  | 0.021 | 1.21  | 0.049 | 1.5  | 0.005 |
| 1435728_at   | tRNA-yW synthesizing protein 3 homolog (S. cerevisiae)                                                                       | Tyw3               | -1.05 | 0.732 | 1.41  | 0.203 | -1.23 | 0.256 | 1.17  | 0.733 | 1.5  | 0.012 |
| 1456641_at   | RIKEN cDNA 1190007F08 gene                                                                                                   | 1190007F08Rik      | 1.21  | 0.200 | 1.41  | 0.214 | 1.22  | 0.750 | 1.06  | 0.748 | 1.51 | 0.034 |
| 1436345_at   | RIKEN cDNA 5730559C18 gene                                                                                                   | 5730559C18Rik      | -1.12 | 0.539 | 1.33  | 0.092 | 1.44  | 0.141 | 1.25  | 0.060 | 1.51 | 0.004 |
| 1448471_a_at | cytotoxic T lymphocyte-associated protein 2 alpha                                                                            | Ctla2a             | -1.32 | 0.344 | -1.2  | 0.606 | 1.31  | 0.932 | -1.02 | 0.796 | 1.51 | 0.020 |
| 1418780_at   | cytochrome P450, family 39, subfamily a, polypeptide 1                                                                       | Cyp39a1            | -1.2  | 0.350 | -1.65 | 0.150 | 1.24  | 0.605 | 1.58  | 0.154 | 1.51 | 0.048 |
| 1450549_s_at | ELK4, member of ETS oncogene family                                                                                          | Elk4               | 1.45  | 0.922 | 1.26  | 0.630 | -1    | 0.468 | 1.68  | 0.342 | 1.51 | 0.022 |
| 1451589_at   | opposite strand transcription unit to Stag3                                                                                  | Gats               | -1.13 | 0.408 | -1.43 | 0.188 | 2.4   | 0.199 | 1.17  | 0.276 | 1.51 | 0.014 |
| 1416968_a_at | hydroxy-delta-5-steroid dehydrogenase, 3 beta- and steroid delta-isomerase                                                   | Hsd3b7             | 1.15  | 0.078 | 1.24  | 0.132 | 1.26  | 0.062 | 1.15  | 0.045 | 1.51 | 0.039 |
| 1460312_at   | olfactory receptor 157                                                                                                       | Olf157             | 1.03  | 0.896 | 1.05  | 0.655 | 1.16  | 0.979 | 1.14  | 0.893 | 1.51 | 0.047 |
| 1421696_at   | polycystic kidney and hepatic disease 1-like 1                                                                               | Pkhd11             | 1.46  | 0.533 | -1.86 | 0.074 | 2.13  | 0.013 | 2.67  | 0.150 | 1.51 | 0.025 |
| 1448757_at   | promyelocytic leukemia                                                                                                       | Pml                | 1.31  | 0.373 | 2.28  | 0.012 | 1.23  | 0.074 | 1.33  | 0.090 | 1.51 | 0.006 |
| 1418423_s_at | serine (or cysteine) peptidase inhibitor, clade B, member 9f // serine (or cysteine) peptidase inhibitor, clade B, member 9f | Serp1b9f // Serpin | 2.83  | 0.335 | 2.41  | 0.072 | 1.27  | 0.813 | 1.06  | 0.824 | 1.51 | 0.045 |
| 1427737_a_at | RIKEN cDNA 1200011M11 gene                                                                                                   | 1200011M11Rik      | -1.06 | 0.480 | 1.19  | 0.283 | 1.25  | 0.086 | 1.07  | 0.599 | 1.52 | 0.001 |
| 1452747_at   | ATPase type 13A2 // similar to ATPase type 13A2                                                                              | Atp13a2 // LOC67   | 1.03  | 0.662 | -1.31 | 0.276 | 2.21  | 0.848 | -1.22 | 0.382 | 1.52 | 0.050 |
| 1451273_x_at | cDNA sequence BC025546                                                                                                       | BC025546           | 1.02  | 0.475 | 1.46  | 0.060 | 1.26  | 0.107 | 1.18  | 0.110 | 1.52 | 0.005 |
| 1440886_at   | cell division cycle 37 homolog (S. cerevisiae)-like 1                                                                        | Cdc37l1            | 1.07  | 0.879 | 1.44  | 0.141 | 1.7   | 0.043 | 1.58  | 0.024 | 1.52 | 0.007 |
| 1449037_at   | cAMP responsive element modulator                                                                                            | Crem               | 1.25  | 0.126 | 1.6   | 0.053 | 1.35  | 0.001 | 1.24  | 0.053 | 1.52 | 0.005 |
| 1426594_at   | FERM domain containing 4B                                                                                                    | Frm4b              | 1.85  | 0.734 | 1.58  | 0.309 | -2.17 | 0.035 | -1.36 | 0.199 | 1.52 | 0.031 |
| 1451043_at   | NIMA (never in mitosis gene a)-related expressed kinase 6                                                                    | Nek6               | 1.22  | 0.384 | 1.41  | 0.320 | 1.5   | 0.246 | 1.42  | 0.757 | 1.52 | 0.018 |
| 1428615_at   | purinergic receptor P2Y, G-protein coupled, 5                                                                                | P2ry5              | 1.24  | 0.018 | 1.7   | 0.043 | 1.44  | 0.019 | 1.35  | 0.009 | 1.52 | 0.011 |
| 1421265_a_at | RNA binding motif protein 38                                                                                                 | Rbm38              | 1.33  | 0.594 | 1.9   | 0.045 | 1.36  | 0.540 | 1.1   | 0.323 | 1.52 | 0.044 |
| 1436869_at   | sonic hedgehog                                                                                                               | Shh                | 1.03  | 0.594 | 1.41  | 0.959 | 1.43  | 0.938 | 1.73  | 0.856 | 1.52 | 0.018 |
| 1449011_at   | solute carrier family 12, member 7                                                                                           | Slc12a7            | 1.42  | 0.200 | 1.49  | 0.203 | 1.18  | 0.675 | 1.09  | 0.961 | 1.52 | 0.036 |
| 1428805_at   | solute carrier family 35, member E3                                                                                          | Slc35e3            | 1.93  | 0.233 | 3.11  | 0.012 | 1.18  | 0.069 | 1.35  | 0.006 | 1.52 | 0.003 |
| 1433705_at   | zinc finger protein 213                                                                                                      | Zfp213             | 1.04  | 0.972 | 1.39  | 0.007 | 1.3   | 0.020 | 1.31  | 0.007 | 1.52 | 0.023 |

|              |                                                                                                  |               |       |       |       |       |       |       |       |       |      |       |
|--------------|--------------------------------------------------------------------------------------------------|---------------|-------|-------|-------|-------|-------|-------|-------|-------|------|-------|
| 1429484_at   | RIKEN cDNA 1110002L01 gene                                                                       | 1110002L01Rik | 1.07  | 0.465 | 1.22  | 0.201 | 1.17  | 0.094 | 1.12  | 0.092 | 1.53 | 0.006 |
| 1433877_at   | RIKEN cDNA 4732473B16 gene                                                                       | 4732473B16Rik | 2.16  | 0.396 | 2.96  | 0.019 | 1.17  | 0.106 | 1.19  | 0.216 | 1.53 | 0.025 |
| 1423100_at   | FBJ osteosarcoma oncogene                                                                        | Fos           | -1.01 | 0.953 | 1.62  | 0.005 | 1.36  | 0.029 | 1.46  | 0.003 | 1.53 | 0.003 |
| 1428014_at   | histone 1, H4h                                                                                   | Hist1h4h      | 1.88  | 0.081 | 2.05  | 0.044 | 1.17  | 0.339 | 1.03  | 0.856 | 1.53 | 0.018 |
| 1421332_at   | heparan sulfate (glucosamine) 3-O-sulfotransferase 3B1                                           | Hs3st3b1      | -1.09 | 0.910 | 1.37  | 0.346 | -1.3  | 0.217 | 1.15  | 0.797 | 1.53 | 0.039 |
| 1457938_at   | Nuclear receptor co-repressor 1                                                                  | Ncor1         | -1.12 | 0.293 | 1.03  | 0.717 | 2.31  | 0.164 | 1.34  | 0.457 | 1.53 | 0.044 |
| 1421321_a_at | neuroepithelial cell transforming gene 1                                                         | Net1          | 1.8   | 0.415 | 2.62  | 0.108 | 1.1   | 0.423 | 1.26  | 0.024 | 1.53 | 0.015 |
| 1457252_x_at | phospholipase D2                                                                                 | Pld2          | 1.06  | 0.642 | 1.49  | 0.738 | 1.27  | 0.111 | 1.22  | 0.289 | 1.53 | 0.047 |
| 1417676_a_at | protein tyrosine phosphatase, receptor type, O                                                   | Ptpro         | -1.93 | 0.065 | -1.29 | 0.456 | -1.29 | 0.397 | 1.07  | 0.817 | 1.53 | 0.015 |
| 1418535_at   | ral guanine nucleotide dissociation stimulator,-like 1                                           | Rgl1          | -1.01 | 0.743 | -1.02 | 0.657 | 1.15  | 0.941 | -1.01 | 0.610 | 1.53 | 0.006 |
| 1455867_at   | SRY-box containing gene 4                                                                        | Sox4          | 1.01  | 0.719 | 1.17  | 0.375 | 1.23  | 0.172 | 1.2   | 0.225 | 1.53 | 0.020 |
| 1432752_at   | RIKEN cDNA 4930403O18 gene                                                                       | 4930403O18Rik | -1.73 | 0.038 | -1.11 | 0.746 | 1.31  | 0.534 | -1.3  | 0.197 | 1.54 | 0.006 |
| 1446309_at   | RIKEN cDNA 5830483C08 gene                                                                       | 5830483C08Rik | -1.3  | 0.319 | 1.61  | 0.593 | 1.98  | 0.076 | -2.01 | 0.165 | 1.54 | 0.044 |
| 1435571_at   | RIKEN cDNA A530065I17 gene                                                                       | A530065I17Rik | 1.22  | 0.759 | 1.41  | 0.814 | 1.24  | 0.233 | 1.31  | 0.974 | 1.54 | 0.031 |
| 1437455_a_at | B-cell translocation gene 1, anti-proliferative                                                  | Btg1          | -1.21 | 0.180 | 1.1   | 0.674 | 1.26  | 0.042 | 1.03  | 0.948 | 1.54 | 0.005 |
| 1423287_at   | cerebellin 1 precursor protein                                                                   | Cbln1         | -1.06 | 0.525 | -1.57 | 0.325 | 1.1   | 0.515 | 2.64  | 0.584 | 1.54 | 0.016 |
| 1416363_at   | FK506 binding protein 4                                                                          | Fkbp4         | 1.03  | 0.577 | 1.19  | 0.982 | 1.69  | 0.950 | 1.43  | 0.536 | 1.54 | 0.043 |
| 1430038_at   | gephyrin                                                                                         | Gphn          | 1.02  | 0.888 | 1.25  | 0.024 | 1.11  | 0.465 | 1.23  | 0.406 | 1.54 | 0.046 |
| 1459274_at   | G protein-coupled receptor 135                                                                   | Gpr135        | 1.39  | 0.373 | 1.74  | 0.248 | 1.13  | 0.438 | 1.34  | 0.204 | 1.54 | 0.009 |
| 1421569_at   | glutamate receptor, ionotropic, delta 1                                                          | Grid1         | 1.54  | 0.869 | -1.16 | 0.423 | 1.15  | 0.772 | 1.2   | 0.977 | 1.54 | 0.029 |
| 1453466_at   | ribosomal protein S6                                                                             | Rps6          | 1.24  | 0.389 | -1.1  | 0.356 | 1.43  | 0.223 | -1.1  | 0.651 | 1.54 | 0.009 |
| 1450033_a_at | signal transducer and activator of transcription 1                                               | Stat1         | 1.92  | 0.548 | 1.4   | 0.534 | 1.27  | 0.516 | 1.16  | 0.221 | 1.54 | 0.026 |
| 1452273_at   | expressed sequence AA409316                                                                      | AA409316      | 1.23  | 0.209 | 1.58  | 0.035 | 1.42  | 0.014 | 1.3   | 0.012 | 1.55 | 0.033 |
| 1438211_s_at | D site albumin promoter binding protein                                                          | Dbp           | -1.04 | 0.577 | 1.24  | 0.90  | 1.11  | 0.993 | -1.21 | 0.003 | 1.55 | 0.032 |
| 1442869_at   | docking protein 7                                                                                | Dok7          | 1.49  | 0.886 | 1.05  | 0.344 | 1.27  | 0.945 | 2.04  | 0.061 | 1.55 | 0.047 |
| 1418862_at   | enoyl Coenzyme A hydratase domain containing 3                                                   | Echdc3        | -1.49 | 0.180 | -1.47 | 0.315 | 1.16  | 0.421 | -1.17 | 0.188 | 1.55 | 0.006 |
| 1426938_at   | neuro-oncological ventral antigen 1 /// similar to neuro-oncological ventral ; Nova1 /// LOC6644 | Nova1         | 3.15  | 0.204 | 1.54  | 0.708 | 2.27  | 0.449 | -1.06 | 0.774 | 1.55 | 0.011 |
| 1449468_at   | ST6 (alpha-N-acetylneuraminyl-2,3-beta-galactosyl-1,3)-N-acetylgalactosyltransferase 5           | St6galnac5    | 1.04  | 0.965 | 1.3   | 0.460 | -1.2  | 0.316 | -1.18 | 0.230 | 1.55 | 0.003 |
| 1422202_at   | thyroid hormone receptor beta                                                                    | Thrb          | -1.24 | 0.261 | -1.13 | 0.022 | 1.42  | 0.541 | -1.05 | 0.694 | 1.55 | 0.043 |
| 1441842_s_at | zinc finger protein 707                                                                          | Zfp707        | 1     | 0.921 | 1.31  | 0.227 | -1.4  | 0.000 | 1.25  | 0.271 | 1.55 | 0.010 |
| 1431616_at   | RIKEN cDNA 1700067C01 gene                                                                       | 1700067C01Rik | 1.76  | 0.483 | 1.39  | 0.867 | 1.5   | 0.537 | -1.01 | 0.829 | 1.56 | 0.028 |
| 1429812_at   | RIKEN cDNA 2610002D18 gene                                                                       | 2610002D18Rik | 1.01  | 0.946 | 1.38  | 0.034 | 1.42  | 0.060 | 1.27  | 0.186 | 1.56 | 0.040 |
| 1421134_at   | amphiregulin                                                                                     | Areg          | 1.62  | 0.661 | 2.26  | 0.067 | 1.95  | 0.195 | 1.25  | 0.263 | 1.56 | 0.017 |
| 1437486_at   | G protein-coupled receptor, family C, group 5, member A                                          | Gprc5a        | 2.81  | 0.187 | 4.18  | 0.050 | 1.55  | 0.007 | 1.18  | 0.031 | 1.56 | 0.007 |
| 1421016_at   | immunoglobulin mu binding protein 2                                                              | Ighmbp2       | 2.18  | 0.639 | 2.2   | 0.537 | 1.74  | 0.090 | 1.16  | 0.178 | 1.56 | 0.033 |
| 1433575_at   | similar to Transcription factor SOX-4                                                            | LOC672274     | 1.53  | 0.189 | 2.22  | 0.048 | 1.45  | 0.012 | 1.39  | 0.011 | 1.56 | 0.000 |
| 1458299_s_at | nuclear factor of kappa light polypeptide gene enhancer in B-cells inhibitor                     | Nfkbie        | -1.31 | 0.212 | 1.44  | 0.928 | 4.17  | 0.114 | 1.4   | 0.117 | 1.56 | 0.050 |
| 1416505_at   | nuclear receptor subfamily 4, group A, member 1                                                  | Nr4a1         | 1.34  | 0.031 | 2.01  | 0.033 | 1.48  | 0.004 | 1.38  | 0.001 | 1.56 | 0.010 |
| 1455894_at   | peptidyl-tRNA hydrolase 2                                                                        | Pthr2         | 1.57  | 0.223 | 2.77  | 0.009 | 1.65  | 0.003 | 1.8   | 0.019 | 1.56 | 0.012 |
| 1419342_at   | translocating chain-associating membrane protein 2                                               | Tram2         | 1.35  | 0.664 | 1.06  | 0.724 | 1.65  | 0.780 | 2.01  | 0.386 | 1.56 | 0.022 |
| 1428564_at   | zinc finger protein 579                                                                          | Zfp579        | -1.13 | 0.371 | -1.05 | 0.583 | 1.13  | 0.833 | 1.25  | 0.075 | 1.56 | 0.022 |
| 1432268_at   | RIKEN cDNA 2310068J16 gene                                                                       | 2310068J16Rik | -1.37 | 0.306 | 1.01  | 0.591 | -1.05 | 0.564 | 1.21  | 0.130 | 1.57 | 0.001 |
| 1453006_at   | RIKEN cDNA 2610306H15 gene                                                                       | 2610306H15Rik | 1.09  | 0.348 | 1.57  | 0.040 | 1.44  | 0.036 | 1.26  | 0.000 | 1.57 | 0.006 |
| 1451426_at   | DNA segment, Chr 11, Lothar Hennighausen 2, expressed                                            | D11Lgp2e      | -1.29 | 0.354 | 1.02  | 0.522 | -1.1  | 0.503 | 1.04  | 0.931 | 1.57 | 0.021 |
| 1431019_at   | leucine rich repeat containing 28                                                                | Lrrc28        | 1.38  | 0.427 | 1.49  | 0.466 | -1.02 | 0.804 | 1.11  | 0.692 | 1.57 | 0.004 |
| 1427520_a_at | myosin, heavy polypeptide 1, skeletal muscle, adult                                              | Myh1          | -1.34 | 0.273 | 1.17  | 0.748 | 1.32  | 0.217 | -1.67 | 0.200 | 1.57 | 0.041 |
| 1446405_at   | MYST histone acetyltransferase (monocytic leukemia) 3                                            | Myst3         | -1.44 | 0.204 | -1.72 | 0.207 | -1.32 | 0.188 | -1.21 | 0.380 | 1.57 | 0.008 |
| 1420406_at   | paternally expressed 12                                                                          | Peg12         | -1.25 | 0.323 | 1.35  | 0.538 | 1.39  | 0.434 | -1.17 | 0.121 | 1.57 | 0.016 |
| 1456106_x_at | serologically defined colon cancer antigen 3                                                     | Sdccag3       | 1.02  | 0.559 | -1.1  | 0.466 | -1.01 | 0.864 | 1.09  | 0.208 | 1.57 | 0.018 |
| 1434015_at   | solute carrier family 2 (facilitated glucose transporter), member 6                              | Slc2a6        | 1.73  | 0.222 | -1.34 | 0.238 | 1.91  | 0.798 | 1.22  | 0.399 | 1.57 | 0.043 |
| 1450644_at   | zinc finger protein 36, C3H type-like 1                                                          | Zfp361        | -1.03 | 0.752 | 1.4   | 0.022 | 1.55  | 0.030 | 1.33  | 0.016 | 1.57 | 0.000 |
| 1417158_at   | ZXD family zinc finger C                                                                         | Zxdc          | -1.04 | 0.651 | 1.22  | 0.016 | -1.01 | 0.927 | -1.14 | 0.191 | 1.57 | 0.027 |
| 1457158_at   | RIKEN cDNA 0610039J04 gene                                                                       | 0610039J04Rik | 1.54  | 0.632 | -1.33 | 0.276 | 3.35  | 0.025 | 2.8   | 0.075 | 1.58 | 0.003 |
| 1432541_at   | RIKEN cDNA 4930408O17 gene                                                                       | 4930408O17Rik | -1.57 | 0.071 | -1.08 | 0.638 | 1.16  | 0.483 | 1.18  | 0.311 | 1.58 | 0.005 |
| 1452700_s_at | kelch repeat and BTB (POZ) domain containing 7                                                   | Kbtbd7        | -1.03 | 0.673 | 1.55  | 0.008 | 1.52  | 0.005 | 1.29  | 0.083 | 1.58 | 0.025 |
| 1439960_at   | RNA pseudouridylylase synthase domain containing 2                                               | Rpusd2        | -1.03 | 0.616 | 1.41  | 0.403 | 1.61  | 0.167 | 1.13  | 0.213 | 1.58 | 0.037 |
| 1427284_a_at | tocopherol (alpha) transfer protein                                                              | Ttpa          | 1.35  | 0.822 | 1.4   | 0.852 | 1.76  | 0.241 | -1.5  | 0.107 | 1.58 | 0.030 |
| 1418362_at   | zinc finger protein 42                                                                           | Zfp42         | 1.65  | 0.500 | 1.97  | 0.305 | 2.38  | 0.456 | 1.41  | 0.146 | 1.58 | 0.011 |

|              |                                                                               |                    |       |       |       |       |       |       |       |       |      |       |
|--------------|-------------------------------------------------------------------------------|--------------------|-------|-------|-------|-------|-------|-------|-------|-------|------|-------|
| 1450410_a_at | RIKEN cDNA 4930570C03 gene                                                    | 4930570C03Rik      | 1.3   | 0.411 | 1.37  | 0.196 | 1.08  | 0.042 | 1.33  | 0.029 | 1.59 | 0.037 |
| 1439499_at   | expressed sequence AA415398                                                   | AA415398           | 1.6   | 0.674 | -1.32 | 0.308 | 1.36  | 0.678 | 1.54  | 0.620 | 1.59 | 0.044 |
| 1460710_at   | adenosine A2a receptor                                                        | Adora2a            | -1.06 | 0.426 | 1.21  | 0.867 | -1.13 | 0.424 | 1.66  | 0.092 | 1.59 | 0.049 |
| 1435714_x_at | interleukin 17D                                                               | Il17d              | -1.27 | 0.077 | 1.15  | 0.319 | 1.12  | 0.204 | 1.2   | 0.416 | 1.59 | 0.000 |
| 1428186_at   | potassium channel tetramerisation domain containing 6                         | Kctd6              | -1.12 | 0.307 | 1.14  | 0.846 | 1.44  | 0.069 | 1.12  | 0.086 | 1.59 | 0.012 |
| 1418924_at   | Ras association (RalGDS/AF-6) domain family 7                                 | Rassf7             | -1.09 | 0.482 | 1.17  | 0.470 | 1.11  | 0.356 | 1.1   | 0.281 | 1.59 | 0.024 |
| 1450417_a_at | ribosomal protein S20 /// similar to 40S ribosomal protein S20 /// similar to | Rps20 /// LOC24545 | 1.35  | 0.045 | 1.55  | 0.049 | 1.9   | 0.449 | 1.25  | 0.412 | 1.59 | 0.016 |
| 1446528_at   | SCY1-like 2 (S. cerevisiae)                                                   | Scyl2              | 1.34  | 0.767 | -1.66 | 0.175 | -1.01 | 0.697 | 1.21  | 0.747 | 1.59 | 0.015 |
| 1444275_at   | Uronyl-2-sulfotransferase                                                     | Ust                | 1.45  | 0.656 | 1.24  | 0.325 | 1.01  | 0.975 | 1.02  | 0.572 | 1.59 | 0.011 |
| 1445937_at   | RIKEN cDNA A630001G21 gene                                                    | A630001G21Rik      | 1.07  | 0.805 | 1.23  | 0.523 | 3.25  | 0.487 | -1.1  | 0.609 | 1.6  | 0.031 |
| 1428669_at   | brain expressed myelocytomatosis oncogene                                     | Bmyc               | -1.02 | 0.607 | 1.04  | 0.871 | 1.16  | 0.569 | 1.19  | 0.104 | 1.6  | 0.004 |
| 1423166_at   | CD36 antigen                                                                  | Cd36               | 1.2   | 0.976 | 1.09  | 0.989 | -1.19 | 0.251 | -1.03 | 0.858 | 1.6  | 0.048 |
| 1459683_at   | similar to spermatogenic cell-specific gene 2                                 | LOC218695          | 2.52  | 0.807 | 2.89  | 0.054 | 1.55  | 0.123 | -1.19 | 0.547 | 1.6  | 0.047 |
| 1444419_at   | prolylcarboxypeptidase (angiotensinase C)                                     | Prpc               | -1.23 | 0.317 | 1.01  | 0.714 | 1.46  | 0.280 | 1.12  | 0.815 | 1.6  | 0.044 |
| 1450956_at   | stearoyl-coenzyme A desaturase 3                                              | Scd3               | 1.14  | 0.196 | -1.92 | 0.146 | 1.9   | 0.505 | 1.28  | 0.116 | 1.6  | 0.002 |
| 1419083_at   | tumor necrosis factor (ligand) superfamily, member 11                         | Tnfsf11            | 2.87  | 0.270 | 1.67  | 0.427 | 1.73  | 0.016 | 1.68  | 0.187 | 1.6  | 0.030 |
| 1456857_at   | RIKEN cDNA 1500011B03 gene                                                    | 1500011B03Rik      | 1.11  | 0.995 | 1.24  | 0.243 | -1.2  | 0.340 | 1.44  | 0.283 | 1.61 | 0.019 |
| 1438340_at   | RIKEN cDNA A930006D11Rik gene                                                 | A930006D11Rik      | -1.32 | 0.260 | 1.02  | 0.752 | -1.08 | 0.657 | -1.25 | 0.106 | 1.61 | 0.003 |
| 1419483_at   | complement component 3a receptor 1                                            | C3ar1              | 1.78  | 0.634 | 1.79  | 0.209 | 1.37  | 0.015 | 1.34  | 0.188 | 1.61 | 0.007 |
| 1453500_at   | cytochrome P450, family 2, subfamily u, polypeptide 1                         | Cyp2u1             | 2.51  | 0.305 | 3.85  | 0.038 | 1.05  | 0.805 | 1.57  | 0.095 | 1.61 | 0.030 |
| 1417115_at   | mitogen activated protein kinase kinase kinase 12                             | Map3k12            | 1.03  | 0.764 | 1.2   | 0.856 | 1.15  | 0.393 | 1.27  | 0.024 | 1.61 | 0.047 |
| 1451190_a_at | SH3-binding kinase 1                                                          | Sbk1               | -1.29 | 0.317 | 1.43  | 0.673 | 1.82  | 0.072 | 1.3   | 0.005 | 1.61 | 0.024 |
| 1451323_at   | zinc finger protein 7                                                         | Zfp7               | 1.25  | 0.645 | 1.71  | 0.062 | 1.52  | 0.002 | 1.49  | 0.006 | 1.61 | 0.046 |
| 1454218_at   | RIKEN cDNA 4930405D01 gene                                                    | 4930405D01Rik      | 1.08  | 0.646 | -1.26 | 0.224 | -1.2  | 0.268 | -1.03 | 0.530 | 1.62 | 0.035 |
| 1424506_at   | cDNA sequence BC026432                                                        | BC026432           | 2.75  | 0.714 | 3.01  | 0.079 | 1.08  | 0.505 | 1.02  | 0.224 | 1.62 | 0.043 |
| 1456005_a_at | BCL2-like 11 (apoptosis facilitator)                                          | Bcl2l11            | -1.36 | 0.329 | 1.22  | 0.785 | 1.19  | 0.108 | 1.32  | 0.087 | 1.62 | 0.013 |
| 1420941_at   | regulator of G-protein signaling 5                                            | Rgs5               | 1.16  | 0.934 | 1.24  | 0.399 | 1.24  | 0.913 | 1.18  | 0.090 | 1.62 | 0.028 |
| 1434560_at   | WD and tetratricopeptide repeats 1                                            | Wdttc1             | 1.44  | 0.829 | -1.43 | 0.241 | 1.27  | 0.310 | -1.24 | 0.018 | 1.62 | 0.010 |
| 1419612_at   | RIKEN cDNA 4632415L05 gene                                                    | 4632415L05Rik      | 1.46  | 0.085 | 1.58  | 0.089 | 1.45  | 0.048 | 1.22  | 0.277 | 1.63 | 0.011 |
| 1453324_at   | RIKEN cDNA 6330509M23 gene                                                    | 6330509M23Rik      | 1.04  | 0.869 | 1.2   | 0.279 | 1.36  | 0.008 | 1.18  | 0.151 | 1.63 | 0.033 |
| 1427985_at   | RIKEN cDNA 9630042H07 gene                                                    | 9630042H07Rik      | 1.06  | 0.755 | 1.36  | 0.032 | 1.39  | 0.145 | 1.44  | 0.016 | 1.63 | 0.002 |
| 1422526_at   | acyl-CoA synthetase long-chain family member 1                                | Acsl1              | -1.04 | 0.549 | 1.54  | 0.988 | 2.51  | 0.462 | 1.2   | 0.966 | 1.63 | 0.033 |
| 1460415_a_at | CD40 antigen                                                                  | Cd40               | -1.21 | 0.113 | -1.07 | 0.688 | 1.59  | 0.278 | 1.1   | 0.464 | 1.63 | 0.028 |
| 1420604_at   | homeo box gene expressed in ES cells                                          | Hesx1              | -1.07 | 0.477 | 1.05  | 0.997 | 1.31  | 0.591 | 2.63  | 0.533 | 1.63 | 0.020 |
| 1460347_at   | keratin 14                                                                    | Krt14              | -1.05 | 0.705 | -1.31 | 0.367 | 1.03  | 0.643 | 1.15  | 0.506 | 1.63 | 0.005 |
| 1449423_at   | microtubule associated serine/threonine kinase 1                              | Mast1              | 2.04  | 0.342 | 2.52  | 0.455 | -1.05 | 0.493 | -1.14 | 0.187 | 1.63 | 0.007 |
| 1424544_at   | nuclear receptor binding protein 2                                            | Nrbp2              | 1.08  | 0.900 | 1.24  | 0.439 | 1.14  | 0.557 | -1.09 | 0.089 | 1.63 | 0.039 |
| 1434530_at   | odd Oz/ten-m homolog 4 (Drosophila)                                           | Odz4               | 1.79  | 0.412 | -1.01 | 0.727 | -1.07 | 0.524 | 1.27  | 0.892 | 1.63 | 0.039 |
| 1451624_a_at | phosphatase, orphan 2                                                         | Phospho2           | 1.03  | 0.988 | 1.39  | 0.251 | 1.22  | 0.020 | 1.35  | 0.028 | 1.63 | 0.029 |
| 1450261_a_at | solute carrier family 10 (sodium/bile acid cotransporter family), member 1    | Slc10a1            | 1.6   | 0.818 | 1.24  | 0.420 | 2.79  | 0.007 | 1.05  | 0.727 | 1.63 | 0.041 |
| 1430259_at   | tumor necrosis factor receptor superfamily, member 11a                        | Tnfrsf11a          | 1.12  | 0.918 | -1.07 | 0.443 | -1.16 | 0.536 | 1.12  | 0.465 | 1.63 | 0.005 |
| 1423176_at   | transducer of ErbB-2.1                                                        | Tob1               | 1.01  | 0.995 | 1.32  | 0.013 | 1.56  | 0.016 | 1.22  | 0.039 | 1.63 | 0.000 |
| 1439352_at   | tripartite motif protein 7                                                    | Trim7              | 1.08  | 0.732 | 1.62  | 0.490 | 1.44  | 0.150 | -1.03 | 0.923 | 1.63 | 0.019 |
| 1430938_at   | zinc finger protein 64                                                        | Zfp64              | 2.54  | 0.198 | 1.99  | 0.200 | 1.15  | 0.917 | 2.26  | 0.953 | 1.63 | 0.046 |
| 1449074_at   | RIKEN cDNA 1700019N12 gene                                                    | 1700019N12Rik      | 1.27  | 0.600 | 1.2   | 0.610 | -1.29 | 0.392 | -1.81 | 0.075 | 1.64 | 0.040 |
| 1437265_at   | RIKEN cDNA 5330438D12 gene                                                    | 5330438D12Rik      | -1.01 | 0.567 | 1.18  | 0.847 | -1.11 | 0.143 | 1.13  | 0.900 | 1.64 | 0.025 |
| 1441792_at   | RIKEN cDNA A630033E08 gene                                                    | A630033E08Rik      | -1.01 | 0.782 | -1.3  | 0.331 | 1.13  | 0.779 | 1.13  | 0.775 | 1.64 | 0.048 |
| 1449065_at   | acyl-CoA thioesterase 1                                                       | Acot1              | 1.09  | 0.742 | 1.44  | 0.178 | 1.82  | 0.113 | 1.02  | 0.661 | 1.64 | 0.015 |
| 1420935_a_at | serine/arginine repetitive matrix 1                                           | Srrm1              | 1.09  | 0.670 | 1.46  | 0.023 | -1.25 | 0.176 | 1.03  | 0.941 | 1.64 | 0.037 |
| 1443978_at   | ankyrin repeat domain 41                                                      | Ankrd41            | 1.76  | 0.579 | -1.19 | 0.306 | 1.2   | 0.321 | 1.16  | 0.436 | 1.65 | 0.006 |
| 1429176_at   | leucine rich repeat and sterile alpha motif containing 1                      | Lrsam1             | 1.98  | 0.183 | 1.68  | 0.138 | 1.25  | 0.577 | 1.21  | 0.009 | 1.65 | 0.034 |
| 1420530_at   | neuronal d4 domain family member                                              | Neud4              | 1.31  | 0.749 | 1.56  | 0.428 | 1.17  | 0.275 | 1.24  | 0.000 | 1.65 | 0.020 |
| 1433619_at   | expressed sequence A1894139                                                   | A1894139           | -1.21 | 0.142 | 1.38  | 0.148 | 1.69  | 0.002 | 1.25  | 0.293 | 1.66 | 0.023 |
| 1458656_at   | expressed sequence AW050198                                                   | AW050198           | -1.04 | 0.494 | 1.23  | 0.748 | 1.09  | 0.658 | -1    | 0.963 | 1.66 | 0.014 |
| 1443421_s_at | protocadherin beta 15                                                         | Pcdhb15            | -1.03 | 0.710 | -1.03 | 0.932 | 2.08  | 0.065 | -1.05 | 0.686 | 1.66 | 0.012 |
| 1438949_at   | resistance to inhibitors of cholinesterase 8 homolog (C. elegans)             | Ric8               | -1.16 | 0.402 | 2.08  | 0.469 | 1.57  | 0.853 | 3.03  | 0.306 | 1.66 | 0.008 |
| 1450577_at   | somatostatin receptor 3                                                       | Sstr3              | 1.88  | 0.564 | 3.04  | 0.204 | 1.49  | 0.288 | 1.22  | 0.622 | 1.66 | 0.035 |
| 1453479_at   | RIKEN cDNA 1700086P04 gene                                                    | 1700086P04Rik      | -1.65 | 0.098 | 1.06  | 0.547 | 2.81  | 0.928 | 1.32  | 0.797 | 1.67 | 0.017 |

|              |                                                                                          |               |       |       |       |       |       |       |       |       |      |       |
|--------------|------------------------------------------------------------------------------------------|---------------|-------|-------|-------|-------|-------|-------|-------|-------|------|-------|
| 1453081_at   | RIKEN cDNA 2410022M11 gene                                                               | 2410022M11Rik | -1.19 | 0.397 | -1.11 | 0.458 | 1.01  | 0.920 | 1.31  | 0.026 | 1.67 | 0.002 |
| 1431514_at   | RIKEN cDNA 5730453C05 gene                                                               | 5730453C05Rik | -1.35 | 0.310 | -1.2  | 0.385 | 1.37  | 0.786 | 2.05  | 0.244 | 1.67 | 0.012 |
| 1436627_at   | DNA segment, Chr 17, ERATO Doi 663, expressed                                            | D17Erttd663e  | 2.3   | 0.228 | 1.39  | 0.957 | -1.26 | 0.161 | -1.02 | 0.850 | 1.67 | 0.007 |
| 1432181_s_at | endothelial cell growth factor 1 (platelet-derived)                                      | Ecgf1         | 1.17  | 0.185 | 1.72  | 0.003 | 1.5   | 0.155 | 1.5   | 0.006 | 1.67 | 0.016 |
| 1435192_at   | similar to SRY (sex determining region Y)-box 3                                          | LOC631901     | 2.63  | 0.341 | 2.38  | 0.438 | 1.16  | 0.739 | 1.06  | 0.899 | 1.67 | 0.043 |
| 1455099_at   | monoacylglycerol O-acyltransferase 2                                                     | Mogat2        | 1.08  | 0.676 | -1.01 | 0.873 | -1.19 | 0.467 | 1.04  | 0.932 | 1.67 | 0.010 |
| 1443922_at   | REST corepressor 3                                                                       | Rcor3         | 1.51  | 0.531 | 1.76  | 0.153 | 1.4   | 0.585 | -1.03 | 0.930 | 1.67 | 0.003 |
| 1450093_s_at | zinc finger and BTB domain containing 7a                                                 | Zbtb7a        | -1.17 | 0.351 | -1.15 | 0.438 | -1.15 | 0.428 | -1.03 | 0.765 | 1.67 | 0.043 |
| 1453671_at   | RIKEN cDNA 9430041J12 gene                                                               | 9430041J12Rik | -1.93 | 0.065 | 1.33  | 0.470 | 1.88  | 0.764 | 1.41  | 0.390 | 1.68 | 0.034 |
| 1434962_x_at | chemokine (C-C motif) ligand 27                                                          | Ccl27         | -1.2  | 0.312 | -1.11 | 0.530 | 1.07  | 0.984 | -1.01 | 0.632 | 1.68 | 0.042 |
| 1431026_at   | N-acetyltransferase 12                                                                   | Nat12         | -1.17 | 0.434 | 1.21  | 0.886 | 1.25  | 0.237 | 1.35  | 0.005 | 1.68 | 0.037 |
| 1459068_at   | Transmembrane protein 109                                                                | Tmem109       | -1.29 | 0.415 | -1.11 | 0.470 | -1.22 | 0.199 | 1.26  | 0.666 | 1.68 | 0.021 |
| 1443737_at   | Exportin 6                                                                               | Xpo6          | -1.09 | 0.699 | -1.06 | 0.574 | 1.58  | 0.157 | -1.18 | 0.401 | 1.68 | 0.020 |
| 1436219_at   | RIKEN cDNA 4933403F05 gene                                                               | 4933403F05Rik | 1.4   | 0.038 | 2.63  | 0.005 | 1.56  | 0.008 | 1.75  | 0.002 | 1.69 | 0.008 |
| 1451263_a_at | fatty acid binding protein 4, adipocyte                                                  | Fabp4         | -1.51 | 0.205 | -1.04 | 0.663 | -1.09 | 0.336 | -1.29 | 0.023 | 1.69 | 0.021 |
| 1455948_x_at | matrilin 3                                                                               | Matn3         | -1.01 | 0.438 | 1.1   | 0.576 | 1.69  | 0.612 | 1.96  | 0.361 | 1.69 | 0.030 |
| 1434209_at   | protein arginine N-methyltransferase 6                                                   | Prmt6         | 1.74  | 0.125 | 1.66  | 0.086 | 1.47  | 0.062 | 1.46  | 0.263 | 1.69 | 0.022 |
| 1424865_at   | peptide YY                                                                               | Pyy           | -1.33 | 0.339 | 1.38  | 0.613 | 2     | 0.724 | -1.65 | 0.199 | 1.69 | 0.019 |
| 1430032_at   | RNA binding motif protein 4B                                                             | Rbm4b         | -1.02 | 0.754 | 1.26  | 0.330 | 1.53  | 0.058 | 1.54  | 0.001 | 1.69 | 0.006 |
| 1416926_at   | transformation related protein 53 inducible nuclear protein 1                            | Trp53inp1     | 1.12  | 0.621 | 2.52  | 0.002 | 1.79  | 0.000 | 1.45  | 0.047 | 1.69 | 0.003 |
| 1433328_at   | RIKEN cDNA 1700095A21 gene                                                               | 1700095A21Rik | 1.2   | 0.858 | -1.18 | 0.226 | 1.25  | 0.618 | 1.19  | 0.948 | 1.7  | 0.021 |
| 1426734_at   | cDNA sequence BC022623                                                                   | BC022623      | 3.84  | 0.469 | 3.79  | 0.002 | 1.24  | 0.172 | 1.47  | 0.066 | 1.7  | 0.024 |
| 1446952_at   | DNA segment, Chr 11, ERATO Doi 506, expressed                                            | D11Erttd506e  | -1.21 | 0.183 | -1.16 | 0.403 | 2.26  | 0.079 | -1.01 | 0.354 | 1.7  | 0.030 |
| 1446948_at   | Density-regulated protein                                                                | Denr          | -1.06 | 0.620 | -1.16 | 0.401 | 1.09  | 0.820 | 1.59  | 0.388 | 1.7  | 0.004 |
| 1424794_at   | ring finger protein 186                                                                  | Rnf186        | 1.05  | 0.866 | -1.09 | 0.649 | 1.79  | 0.083 | 1.5   | 0.584 | 1.7  | 0.014 |
| 1427523_at   | sine oculis-related homeobox 3 homolog (Drosophila) /// RIKEN cDNA E1c:Six3 /// E130112M |               | -1.08 | 0.416 | -1.05 | 0.468 | -1.04 | 0.471 | 1.75  | 0.684 | 1.7  | 0.044 |
| 1439540_at   | membrane-associated ring finger (C3HC4) 2                                                |               | 2.05  | 0.194 | 2.21  | 0.308 | 1.36  | 0.549 | 1.91  | 0.335 | 1.71 | 0.038 |
| 1453089_at   | RIKEN cDNA 3110079O15 gene                                                               | 3110079O15Rik | 1.02  | 0.813 | 1.76  | 0.999 | 1.73  | 0.656 | 1.15  | 0.262 | 1.71 | 0.042 |
| 1454617_at   | arrestin domain containing 3                                                             | Arddc3        | -1.05 | 0.719 | 1.4   | 0.142 | 1.58  | 0.007 | 1.35  | 0.021 | 1.71 | 0.025 |
| 1456761_at   | RIKEN cDNA D630030B22 gene                                                               | D630030B22Rik | 1.1   | 0.798 | 1.05  | 0.792 | -1.19 | 0.300 | -1.26 | 0.212 | 1.71 | 0.041 |
| 1426236_a_at | glutamate-ammonia ligase (glutamine synthetase)                                          | Glul          | -1.14 | 0.493 | 1.05  | 0.909 | 1.18  | 0.056 | 1.14  | 0.028 | 1.71 | 0.003 |
| 1440644_at   | poly (ADP-ribose) polymerase family, member 6                                            | Parp6         | 1.78  | 0.953 | 2.19  | 0.846 | -1.26 | 0.386 | 2.81  | 0.229 | 1.71 | 0.025 |
| 1448209_a_at | solute carrier family 22 (organic cation transporter), member 17                         | Slc22a17      | -1.2  | 0.371 | 1.68  | 0.213 | 1.38  | 0.133 | 1.21  | 0.974 | 1.71 | 0.003 |
| 1428074_at   | transmembrane protein 158                                                                | Tmem158       | -1.13 | 0.479 | 1.64  | 0.129 | 1.67  | 0.107 | 1.35  | 0.034 | 1.71 | 0.027 |
| 1427217_at   | zinc finger protein 455                                                                  | Zfp455        | 1.32  | 0.681 | 1.53  | 0.201 | -1.03 | 0.535 | 1.41  | 0.245 | 1.71 | 0.037 |
| 1452610_at   | zinc finger protein 99                                                                   | Zfp99         | 1.1   | 0.616 | 1.07  | 0.614 | -1.28 | 0.077 | 1.25  | 0.908 | 1.71 | 0.044 |
| 1445339_at   | cyclic nucleotide gated channel alpha 4                                                  | Cnga4         | 1.13  | 0.666 | 1.22  | 0.675 | 2.36  | 0.130 | 2.1   | 0.335 | 1.72 | 0.008 |
| 1457615_at   | Cytoplasmic FMR1 interacting protein 1                                                   | Cyflp1        | 1.32  | 0.482 | -2.1  | 0.307 | 1.98  | 0.997 | 2.56  | 0.077 | 1.72 | 0.019 |
| 1425062_at   | Fc receptor-like 1                                                                       | Fcrl1         | 1.72  | 0.262 | 1.31  | 0.049 | 1.73  | 0.249 | 1.12  | 0.099 | 1.72 | 0.005 |
| 1437756_at   | GTPase, IMAP family member 9                                                             | Gimap9        | 1.58  | 0.493 | 1.05  | 0.473 | 2.3   | 0.290 | 1.75  | 0.565 | 1.72 | 0.049 |
| 1431053_at   | M-phase phosphoprotein 9                                                                 | Mphosph9      | 1.21  | 0.448 | 1.07  | 0.721 | 1.45  | 0.252 | 1.14  | 0.126 | 1.72 | 0.027 |
| 1434495_at   | zinc finger protein 278                                                                  | Zfp278        | 1.93  | 0.263 | 2.46  | 0.069 | 1.14  | 0.736 | 1.35  | 0.021 | 1.72 | 0.007 |
| 1429985_at   | RIKEN cDNA 5430439G13 gene                                                               | 5430439G13Rik | 1.7   | 0.386 | 2.03  | 0.680 | -1.05 | 0.603 | -1.07 | 0.918 | 1.73 | 0.034 |
| 1439649_at   | arginine decarboxylase                                                                   | Adc           | 5.72  | 0.299 | 6.19  | 0.732 | -1.09 | 0.486 | 1.11  | 0.534 | 1.73 | 0.017 |
| 1447638_at   | Arylformamidase                                                                          | Afmid         | -1.82 | 0.074 | -2.01 | 0.009 | 2.69  | 0.387 | 1.08  | 0.982 | 1.73 | 0.044 |
| 1422817_at   | glycoprotein 5 (platelet)                                                                | Gp5           | -1.5  | 0.273 | -1.4  | 0.125 | 1.67  | 0.916 | 1.44  | 0.868 | 1.73 | 0.005 |
| 1424841_s_at | ribokinase                                                                               | Rbks          | -1.16 | 0.339 | 1.03  | 0.899 | 1.09  | 0.751 | -1.14 | 0.132 | 1.73 | 0.021 |
| 1416571_at   | Tnf receptor associated factor 4                                                         | Traf4         | 1.39  | 0.041 | 2.03  | 0.000 | 1.36  | 0.110 | 1.08  | 0.484 | 1.73 | 0.048 |
| 1436593_at   | RIKEN cDNA 1700016K19 gene                                                               | 1700016K19Rik | 1.67  | 0.544 | 3.4   | 0.034 | 2.4   | 0.177 | 1.26  | 0.129 | 1.74 | 0.042 |
| 1430863_at   | RIKEN cDNA 4933411B09 gene                                                               | 4933411B09Rik | 1.47  | 0.643 | 1.95  | 0.989 | 1.4   | 0.197 | 1.3   | 0.343 | 1.74 | 0.005 |
| 1458550_at   | myosin ID                                                                                | Myo1d         | -1    | 0.452 | 1.03  | 0.475 | 1.37  | 0.129 | 1.35  | 0.765 | 1.74 | 0.033 |
| 1457083_at   | PRP31 pre-mRNA processing factor 31 homolog (yeast)                                      | Prpf31        | 1.59  | 0.196 | 2.41  | 0.030 | 1.35  | 0.032 | 1.41  | 0.043 | 1.74 | 0.020 |
| 1443837_x_at | B-cell leukemia/lymphoma 2                                                               | Bcl2          | 1.47  | 0.499 | -1.23 | 0.383 | 4.44  | 0.216 | 1.69  | 0.035 | 1.75 | 0.029 |
| 1442758_at   | Heterogeneous nuclear ribonucleoprotein A1                                               | Hnrpa1        | 1.55  | 0.987 | -1.18 | 0.191 | -1.34 | 0.332 | 2.59  | 0.460 | 1.75 | 0.042 |
| 1458428_at   | potassium channel, subfamily T, member 1                                                 | Kcnt1         | -1.07 | 0.528 | -1.28 | 0.105 | 2.84  | 0.305 | -1.83 | 0.131 | 1.75 | 0.037 |
| 1451885_at   | metallothionein 1K                                                                       | LOC574530     | 1.33  | 0.932 | 1.12  | 0.537 | 1.69  | 0.580 | 2.53  | 0.594 | 1.75 | 0.014 |
| 1430427_a_at | protocadherin 18                                                                         | Pcdh18        | 1.7   | 0.016 | 2.49  | 0.021 | 2.08  | 0.133 | 1.7   | 0.129 | 1.75 | 0.029 |
| 1456646_at   | peroxisome biogenesis factor 10                                                          | Pex10         | 1.15  | 0.499 | 1.22  | 0.724 | 2.01  | 0.067 | 1.3   | 0.391 | 1.75 | 0.036 |

|              |                                                                       |                   |       |       |       |       |       |       |       |       |      |       |
|--------------|-----------------------------------------------------------------------|-------------------|-------|-------|-------|-------|-------|-------|-------|-------|------|-------|
| 1421885_at   | Son of sevenless homolog 1 (Drosophila)                               | Sos1              | -1.64 | 0.131 | -1.34 | 0.366 | 2.19  | 0.689 | 1.25  | 0.757 | 1.75 | 0.013 |
| 1442105_at   | RIKEN cDNA 4831416G18 gene                                            | 4831416G18Rik     | -1.01 | 0.665 | -1.27 | 0.378 | 2.59  | 0.234 | -1.06 | 0.712 | 1.76 | 0.038 |
| 1417222_at   | neutrophilic granule protein                                          | Ngp               | -1.25 | 0.414 | 1.14  | 0.599 | -1.16 | 0.386 | 1.89  | 0.943 | 1.76 | 0.031 |
| 1460250_at   | sclerostin domain containing 1                                        | Sostdc1           | 1.36  | 0.159 | -1.04 | 0.587 | -1.43 | 0.220 | 1.2   | 0.917 | 1.76 | 0.021 |
| 1436004_at   | ubiquitin specific peptidase 27, X chromosome                         | Usp27x            | -1.09 | 0.488 | 1.32  | 0.380 | 1.35  | 0.153 | 1.32  | 0.018 | 1.76 | 0.024 |
| 1439939_at   | RIKEN cDNA E030042N06 gene                                            | E030042N06Rik     | 1.39  | 0.883 | -1.21 | 0.154 | -1.25 | 0.308 | 1.72  | 0.447 | 1.77 | 0.038 |
| 1426127_x_at | killer cell lectin-like receptor, subfamily A, member 18              | Klra18            | 1.18  | 0.292 | 1.41  | 0.303 | 2.24  | 0.332 | 1.06  | 0.355 | 1.77 | 0.032 |
| 1458353_at   | RIKEN cDNA A230063L24 gene                                            | A230063L24Rik     | 1.38  | 0.174 | 1.03  | 0.864 | 1.19  | 0.465 | 1.05  | 0.768 | 1.78 | 0.022 |
| 1428283_at   | cytochrome P450, family 2, subfamily s, polypeptide 1                 | Cyp2s1            | -1.65 | 0.107 | 2.08  | 0.429 | 1.03  | 0.857 | 1.86  | 0.034 | 1.78 | 0.047 |
| 1449370_at   | SRY-box containing gene 4 /// similar to Transcription factor SOX-4   | Sox4 /// LOC67227 | 1.04  | 0.137 | 1.63  | 0.065 | 1.78  | 0.033 | 1.5   | 0.022 | 1.78 | 0.018 |
| 1436327_a_at | vacuolar protein sorting 53 (yeast)                                   | Vps53             | 3.06  | 0.626 | 2.27  | 0.948 | -1.05 | 0.097 | 1.26  | 0.271 | 1.78 | 0.028 |
| 1430347_at   | RIKEN cDNA 4930524J08 gene                                            | 4930524J08Rik     | 1.22  | 0.958 | 1.28  | 0.788 | 1.65  | 0.124 | -1.18 | 0.341 | 1.79 | 0.014 |
| 1444320_at   | DDHD domain containing 2                                              | Ddhd2             | 1.02  | 0.976 | -1.11 | 0.640 | 3.15  | 0.185 | 1.18  | 0.299 | 1.79 | 0.012 |
| 1433335_at   | RIKEN cDNA 4930405G09 gene                                            | 4930405G09Rik     | 1.26  | 0.768 | 1.7   | 0.568 | 2.47  | 0.348 | -2.54 | 0.006 | 1.8  | 0.020 |
| 1435932_at   | Hermansky-Pudlak syndrome 6                                           | Hps6              | -1.11 | 0.322 | 1.38  | 0.760 | 1.19  | 0.287 | -1.06 | 0.357 | 1.8  | 0.001 |
| 1442549_at   | muscleblind-like 3 (Drosophila)                                       | Mbln3             | 2.34  | 0.015 | 2.16  | 0.173 | -1.17 | 0.810 | -1.05 | 0.718 | 1.8  | 0.044 |
| 1444518_at   | Acyl-Coenzyme A oxidase 1, palmitoyl                                  | Acox1             | 2.87  | 0.739 | 2.06  | 0.864 | 1.81  | 0.472 | 1.21  | 0.665 | 1.81 | 0.030 |
| 1419744_at   | histocompatibility 2, class II, locus Mb2                             | H2-DMb2           | 1.02  | 0.626 | -1.01 | 0.596 | 1.04  | 0.657 | 1.45  | 0.045 | 1.81 | 0.045 |
| 1418160_at   | makorin, ring finger protein, 3                                       | Mkrn3             | 2.29  | 0.307 | 2.97  | 0.098 | -1.01 | 0.723 | -1.16 | 0.553 | 1.81 | 0.023 |
| 1450266_at   | sodium channel, voltage-gated, type X, alpha                          | Scn10a            | 1.91  | 0.502 | 1.05  | 0.471 | 1.36  | 0.279 | 1.23  | 0.567 | 1.81 | 0.008 |
| 1448940_at   | tripartite motif protein 21                                           | Trim21            | 2.57  | 0.753 | 1.75  | 0.004 | 2.97  | 0.013 | 1.14  | 0.363 | 1.81 | 0.015 |
| 1417375_at   | tubulin, alpha 4                                                      | Tuba4             | -1.1  | 0.472 | -1.14 | 0.721 | 1.69  | 0.140 | 1.02  | 0.897 | 1.81 | 0.014 |
| 1449231_at   | zinc finger protein 296                                               | Zfp296            | -1.01 | 0.813 | 1.49  | 0.041 | 1.21  | 0.105 | 1.47  | 0.019 | 1.81 | 0.019 |
| 1433113_at   | RIKEN cDNA 4921504P20 gene                                            | 4921504P20Rik     | 1.05  | 0.947 | 1.29  | 0.316 | -1.19 | 0.101 | -1.01 | 0.940 | 1.82 | 0.002 |
| 1427187_at   | RIKEN cDNA 6030413G23 gene                                            | 6030413G23Rik     | -1.22 | 0.040 | -1.52 | 0.042 | 1.03  | 0.879 | 1.1   | 0.479 | 1.82 | 0.032 |
| 1445059_at   | expressed sequence C80435                                             | C80435            | 1.43  | 0.818 | -1.59 | 0.224 | -1.22 | 0.555 | 2.33  | 0.448 | 1.82 | 0.031 |
| 1457048_at   | G protein-coupled receptor 103                                        | Gpr103            | 1.19  | 0.650 | -1.33 | 0.373 | 1.83  | 0.394 | 2.95  | 0.171 | 1.82 | 0.008 |
| 1437047_at   | zinc finger protein 664                                               | Zfp664            | 2.07  | 0.243 | 2.65  | 0.100 | 2.31  | 0.062 | 1.24  | 0.172 | 1.82 | 0.018 |
| 1421531_at   | A kinase (PRKA) anchor protein 3                                      | Akap3             | 2.51  | 0.245 | 3.31  | 0.075 | -1.55 | 0.056 | 1.46  | 0.872 | 1.83 | 0.027 |
| 1450271_at   | PTK6 protein tyrosine kinase 6                                        | Ptk6              | 1.53  | 0.172 | 1.53  | 0.478 | -1.49 | 0.259 | 1.59  | 0.531 | 1.83 | 0.042 |
| 1454857_at   | ring finger protein 122                                               | Rnf122            | 3     | 0.333 | 4.85  | 0.042 | 1.39  | 0.024 | 1.58  | 0.034 | 1.83 | 0.017 |
| 1453391_at   | spermatogenesis associated glutamate (E)-rich protein 7, pseudogene 1 | Speer7-ps1        | 1.38  | 0.404 | 2.09  | 0.254 | 2.66  | 0.163 | 2.01  | 0.505 | 1.83 | 0.040 |
| 1428298_at   | RIKEN cDNA 1700029G01 gene                                            | 1700029G01Rik     | 1.35  | 0.488 | 1.18  | 0.554 | -1.01 | 0.551 | 1.35  | 0.713 | 1.84 | 0.049 |
| 1455679_at   | RIKEN cDNA 5830411E10 gene                                            | 5830411E10Rik     | 1.93  | 0.264 | 3.7   | 0.007 | 1.83  | 0.053 | 1.96  | 0.005 | 1.84 | 0.005 |
| 1453306_at   | RIKEN cDNA 6330531I01 gene                                            | 6330531I01Rik     | -1.68 | 0.180 | -1.35 | 0.329 | -1.3  | 0.220 | 1.13  | 0.739 | 1.84 | 0.017 |
| 1420557_at   | Eph receptor A5                                                       | Epha5             | 1.29  | 0.181 | 2.19  | 0.107 | 2.47  | 0.343 | -1.24 | 0.470 | 1.84 | 0.002 |
| 1425467_a_at | proteolipid protein (myelin) 1                                        | Plp1              | 1     | 0.463 | -1.27 | 0.355 | 1.85  | 0.291 | 1     | 0.991 | 1.84 | 0.004 |
| 1441969_at   | tripartite motif-containing 36                                        | Trim36            | 1.32  | 0.879 | 1.38  | 0.436 | -1.63 | 0.049 | -1.08 | 0.699 | 1.84 | 0.024 |
| 1432858_at   | RIKEN cDNA D730048M19 gene                                            | D730048M19Rik     | 1.27  | 0.683 | -1.22 | 0.404 | 1.92  | 0.865 | 1.75  | 0.262 | 1.85 | 0.037 |
| 1438415_s_at | Yip1 domain family, member 2                                          | Yipf2             | -1.04 | 0.375 | 1.26  | 0.997 | -1.02 | 0.656 | 1.12  | 0.726 | 1.85 | 0.028 |
| 1456564_at   | RIKEN cDNA 6430706D22 gene                                            | 6430706D22Rik     | 2.15  | 0.500 | 1.59  | 0.226 | 1.49  | 0.167 | 1.14  | 0.734 | 1.86 | 0.014 |
| 1446915_at   | DNA segment, Chr 7, ERATO Doi 316, expressed                          | D7Etd316e         | -1.34 | 0.253 | 1.97  | 0.421 | -1.33 | 0.373 | 1.3   | 0.047 | 1.86 | 0.031 |
| 1431226_a_at | fibronectin type III domain containing 4                              | Fndc4             | -1.03 | 0.684 | 1.21  | 0.494 | 1.25  | 0.433 | -1.23 | 0.071 | 1.86 | 0.026 |
| 1459311_at   | phosphodiesterase 4D, cAMP specific                                   | Pde4d             | 1.4   | 0.412 | 1.65  | 0.635 | 1.71  | 0.524 | -1.19 | 0.384 | 1.86 | 0.046 |
| 1425162_at   | RAR-related orphan receptor beta                                      | Rorb              | 1.1   | 0.972 | -2.22 | 0.018 | -1.35 | 0.280 | 1.01  | 0.840 | 1.86 | 0.025 |
| 1446369_at   | armadillo repeat containing 1                                         | Armc1             | 1.41  | 0.719 | 1.03  | 0.486 | -1.01 | 0.533 | 1.08  | 0.920 | 1.87 | 0.033 |
| 1416072_at   | CD34 antigen                                                          | Cd34              | 2.83  | 0.021 | 1.33  | 0.680 | 1.77  | 0.715 | 1.14  | 0.722 | 1.88 | 0.032 |
| 1428304_at   | establishment of cohesion 1 homolog 2 (S. cerevisiae)                 | Esco2             | 1.46  | 0.174 | 1.66  | 0.156 | 1.32  | 0.176 | 1.18  | 0.227 | 1.88 | 0.022 |
| 1436685_at   | hypothetical LOC544888                                                | LOC544888         | -1.33 | 0.169 | 1.07  | 0.729 | -1.42 | 0.043 | 1.63  | 0.433 | 1.88 | 0.017 |
| 1441520_at   | asp (abnormal spindle)-like, microcephaly associated (Drosophila)     | Aspm              | 2.52  | 0.139 | 3.19  | 0.414 | -1.15 | 0.131 | 1.14  | 0.594 | 1.89 | 0.034 |
| 1457749_at   | coiled-coil and C2 domain containing 1B                               | Cc2d1b            | -1.35 | 0.181 | -1.34 | 0.173 | 1.44  | 0.345 | -1.32 | 0.170 | 1.89 | 0.038 |
| 1424229_at   | dual-specificity tyrosine-(Y)-phosphorylation regulated kinase 3      | Dyrk3             | 2.16  | 0.096 | 3.82  | 0.004 | 1.72  | 0.023 | 1.43  | 0.038 | 1.89 | 0.003 |
| 1444477_at   | Leucine rich repeat transmembrane neuronal 3                          | Lrrtm3            | -1.24 | 0.344 | -1.7  | 0.143 | 1.42  | 0.641 | 1.45  | 0.454 | 1.9  | 0.014 |
| 1436615_a_at | ornithine transcarbamylase                                            | Otc               | 2.68  | 0.704 | 2.76  | 0.840 | 1.41  | 0.400 | 2.05  | 0.877 | 1.9  | 0.044 |
| 1454298_at   | RIKEN cDNA 4932430A15 gene                                            | 4932430A15Rik     | 1.11  | 0.559 | 1.8   | 0.892 | 1.14  | 0.765 | 1.43  | 0.891 | 1.91 | 0.030 |
| 1448901_at   | carboxypeptidase X 1 (M14 family)                                     | Cpxm1             | -1.35 | 0.105 | -1.26 | 0.323 | 1.72  | 0.873 | 1.13  | 0.259 | 1.91 | 0.022 |
| 1452409_at   | glioma tumor suppressor candidate region gene 2                       | Gltscr2           | 1.28  | 0.307 | 1.26  | 0.313 | 1.95  | 0.432 | 1     | 0.614 | 1.91 | 0.011 |
| 1457325_at   | K+ voltage-gated channel, subfamily S, 2                              | Kcns2             | -1.07 | 0.489 | 1.18  | 0.618 | 1.22  | 0.463 | -1.45 | 0.179 | 1.91 | 0.007 |

|              |                                                                                |               |       |       |       |       |       |       |       |       |      |       |
|--------------|--------------------------------------------------------------------------------|---------------|-------|-------|-------|-------|-------|-------|-------|-------|------|-------|
| 1419324_at   | LIM homeobox protein 9                                                         | Lhx9          | 1.02  | 0.732 | 1.67  | 0.071 | 1.39  | 0.106 | 1.26  | 0.238 | 1.91 | 0.011 |
| 1437703_at   | similar to F-box- and WD40-repeat-containing protein                           | LOC382156     | 1.17  | 0.670 | -1.21 | 0.085 | 1.43  | 0.522 | 1.16  | 0.142 | 1.91 | 0.006 |
| 1445420_at   | Myocyte enhancer factor 2C                                                     | Mef2c         | 1.39  | 0.738 | 1.81  | 0.060 | -1.16 | 0.484 | 2.27  | 0.294 | 1.91 | 0.040 |
| 1431748_a_at | ring finger and FYVE like domain containing protein                            | Rffl          | 2.6   | 0.085 | 1.4   | 0.190 | 1.45  | 0.921 | 1.81  | 0.033 | 1.91 | 0.045 |
| 1437710_x_at | RIKEN cDNA 1700021P22 gene                                                     | 1700021P22Rik | 1.1   | 0.934 | 1.01  | 0.980 | 2.6   | 0.719 | 1.15  | 0.827 | 1.92 | 0.036 |
| 1431449_at   | solute carrier organic anion transporter family, member 6d1                    | Slco6d1       | -1.13 | 0.544 | -1.77 | 0.048 | 1.25  | 0.603 | -1.14 | 0.686 | 1.92 | 0.030 |
| 1450448_at   | stanniocalcin 1                                                                | Stc1          | 1.39  | 0.078 | 1.78  | 0.036 | 1.42  | 0.325 | 1.47  | 0.084 | 1.92 | 0.048 |
| 1430451_at   | RIKEN cDNA 4930481B07 gene                                                     | 4930481B07Rik | 2.62  | 0.726 | 2.87  | 0.475 | 1.87  | 0.190 | 1.17  | 0.387 | 1.93 | 0.013 |
| 1443318_at   | RIKEN cDNA E130016E03 gene                                                     | E130016E03Rik | 1.03  | 0.813 | -1.44 | 0.264 | 1.14  | 0.849 | 1.18  | 0.580 | 1.93 | 0.049 |
| 1443680_at   | Otx2 opposite strand transcript 1                                              | Otx2os1       | 2.03  | 0.734 | 1.47  | 0.673 | -1.24 | 0.403 | -1.74 | 0.133 | 1.93 | 0.020 |
| 1445291_at   | arylsulfatase A                                                                | Arsa          | -1.1  | 0.442 | 1.29  | 0.466 | 1.41  | 0.269 | -1.73 | 0.061 | 1.94 | 0.027 |
| 1435860_at   | solute carrier family 5 (sodium-dependent vitamin transporter), member 6       | Slc5a6        | 1.23  | 0.599 | 2.46  | 0.033 | 1.17  | 0.729 | 1.28  | 0.289 | 1.94 | 0.028 |
| 1427791_a_at | a disintegrin and metallopeptidase domain 1a                                   | Adam1a        | -1.12 | 0.354 | -1.21 | 0.444 | 2.13  | 0.117 | 1.06  | 0.630 | 1.95 | 0.011 |
| 1425372_at   | DnaJ (Hsp40) homolog, subfamily C, member 19                                   | Dnajc19       | -1.04 | 0.518 | -1.35 | 0.058 | 1.22  | 0.798 | 1.54  | 0.080 | 1.95 | 0.006 |
| 1434109_at   | SH3 domain binding glutamic acid-rich protein like 2                           | Sh3bgrl2      | 1.48  | 0.183 | 1.24  | 0.651 | 1.65  | 0.112 | -1.04 | 0.408 | 1.95 | 0.002 |
| 1456770_at   | zinc finger protein 14                                                         | Zfp14         | 2.93  | 0.029 | 3     | 0.096 | 1.63  | 0.959 | 1.11  | 0.562 | 1.95 | 0.046 |
| 1453789_at   | RIKEN cDNA 4933440N22 gene                                                     | 4933440N22Rik | -1.01 | 0.550 | -1.09 | 0.812 | 1.72  | 0.405 | 1.19  | 0.872 | 1.96 | 0.011 |
| 1447716_x_at | RIKEN cDNA 6330442E10 gene                                                     | 6330442E10Rik | 1.72  | 0.319 | 1.4   | 0.796 | 1.32  | 0.275 | 1.02  | 0.184 | 1.96 | 0.018 |
| 1427215_at   | acyl-CoA synthetase medium-chain family member 2                               | Acsm2         | 1.01  | 0.544 | -1.14 | 0.596 | -1.07 | 0.641 | -1.11 | 0.488 | 1.96 | 0.049 |
| 1454244_at   | minichromosome maintenance deficient 10 (S. cerevisiae)                        | Mcm10         | 1.14  | 0.242 | 1.36  | 0.544 | 1.98  | 0.174 | 1.1   | 1.000 | 1.96 | 0.016 |
| 1456622_at   | podocalyxin-like 2                                                             | Podxl2        | 1.29  | 0.417 | -1.16 | 0.547 | 1.26  | 0.495 | 1.3   | 0.627 | 1.96 | 0.019 |
| 1446864_at   | S100P binding protein                                                          | S100bbp       | 1.54  | 0.739 | 1.38  | 0.625 | 2.11  | 0.024 | 1.73  | 0.568 | 1.96 | 0.039 |
| 1432567_at   | RIKEN cDNA A430105D02 gene                                                     | A430105D02Rik | 1.43  | 0.920 | -2.29 | 0.119 | -1.15 | 0.487 | 2.97  | 0.636 | 1.97 | 0.047 |
| 1440916_at   | RIKEN cDNA 2510049J12 gene                                                     | 2510049J12Rik | -1.4  | 0.124 | -1.01 | 0.649 | 1.46  | 0.333 | 1.99  | 0.240 | 1.98 | 0.009 |
| 1418037_at   | complement component 4 binding protein                                         | C4bp          | 1.43  | 0.785 | 1.36  | 0.947 | 1.64  | 0.393 | 1.14  | 0.797 | 1.98 | 0.022 |
| 1440490_at   | Membrane protein, palmitoylated 6 (MAGUK p55 subfamily member 6)               | Mpp6          | 2.21  | 0.938 | -1.08 | 0.281 | 1.56  | 0.853 | -1.23 | 0.431 | 1.98 | 0.038 |
| 1446389_at   | Nuclear receptor interacting protein 1                                         | Nrip1         | 1.55  | 0.860 | 1.6   | 0.457 | 2.46  | 0.241 | 1.72  | 0.606 | 1.98 | 0.023 |
| 1447271_at   | non-catalytic region of tyrosine kinase adaptor protein 1                      | Nck1          | 1.34  | 0.326 | 1.2   | 0.569 | 1.31  | 0.726 | 1.74  | 0.724 | 1.99 | 0.015 |
| 1436721_x_at | oogenesis 3                                                                    | Oog3          | 2.34  | 0.314 | 1.07  | 0.542 | 1.35  | 0.548 | 1.15  | 0.321 | 1.99 | 0.026 |
| 1447092_at   | Platelet/endothelial cell adhesion molecule 1                                  | Pecam1        | 1.17  | 0.705 | 1.28  | 0.681 | 1.82  | 0.317 | 2.15  | 0.132 | 1.99 | 0.040 |
| 1436500_at   | ribosomal protein S24                                                          | Rps24         | 1.13  | 0.894 | 1.22  | 0.588 | -1.11 | 0.539 | 1.03  | 0.569 | 1.99 | 0.020 |
| 1441584_at   | Friend leukemia integration 1                                                  | Fli1          | 1.74  | 0.160 | 1.25  | 0.987 | -1.05 | 0.525 | 1.02  | 0.930 | 2    | 0.035 |
| 1446729_at   | dispatched homolog 2 (Drosophila)                                              | Disp2         | -1.57 | 0.045 | -1.15 | 0.229 | 1.64  | 0.974 | 1.42  | 0.405 | 2.01 | 0.040 |
| 1430517_at   | RIKEN cDNA 4930544O15 gene                                                     | 4930544O15Rik | 1.01  | 0.908 | 1.84  | 0.261 | -1.97 | 0.020 | 1.26  | 0.556 | 2.02 | 0.003 |
| 1440676_at   | RIKEN cDNA A830043J08 gene                                                     | A830043J08Rik | -1    | 0.637 | -1.23 | 0.200 | -1.45 | 0.290 | 1.04  | 0.920 | 2.02 | 0.011 |
| 1458313_at   | Cell division cycle 2-like 5 (cholinesterase-related cell division controller) | Cdc2l5        | 1.2   | 0.473 | 1.29  | 0.594 | 1.31  | 0.236 | 1.29  | 0.559 | 2.02 | 0.032 |
| 1429666_at   | potassium channel tetramerisation domain containing 16                         | Kctd16        | 1.88  | 0.009 | 1.39  | 0.309 | 1.33  | 0.201 | 2.47  | 0.159 | 2.02 | 0.039 |
| 1453533_at   | RIKEN cDNA 4933403O08 gene                                                     | 4933403O08Rik | 1.23  | 0.968 | 1.39  | 0.818 | -1.24 | 0.164 | 1.54  | 0.411 | 2.03 | 0.037 |
| 1457310_x_at | scratch homolog 2, zinc finger protein (Drosophila)                            | Scr2          | 1.39  | 0.767 | 1.38  | 0.853 | 1.25  | 0.439 | 1.19  | 0.906 | 2.03 | 0.022 |
| 1439250_at   | SLIT and NTRK-like family, member 3                                            | Slitrk3       | 1.21  | 0.879 | 1.44  | 0.227 | -1.02 | 0.573 | -1.2  | 0.405 | 2.03 | 0.032 |
| 1456915_at   | RIKEN cDNA D930005D10 gene                                                     | D930005D10Rik | 1.18  | 0.806 | 1.53  | 0.412 | -1.56 | 0.161 | 1.03  | 0.706 | 2.04 | 0.010 |
| 1459795_at   | G protein-coupled receptor 85                                                  | Gpr85         | 1.17  | 0.244 | 1.15  | 0.643 | -1.2  | 0.511 | 1.69  | 0.652 | 2.04 | 0.036 |
| 1420352_at   | protease, serine, 22                                                           | Prss22        | 1.13  | 0.465 | 2.17  | 0.696 | -1.05 | 0.726 | -2.13 | 0.047 | 2.05 | 0.005 |
| 1436133_at   | RIKEN cDNA 0610011N22 gene                                                     | 0610011N22Rik | 1.09  | 0.401 | 1.69  | 0.019 | 1.55  | 0.192 | 1.84  | 0.021 | 2.06 | 0.028 |
| 1451415_at   | RIKEN cDNA 1810011O10 gene                                                     | 1810011O10Rik | 1.49  | 0.099 | 1.99  | 0.005 | 2.24  | 0.033 | 1.43  | 0.101 | 2.06 | 0.012 |
| 1427300_at   | LIM homeobox protein 8                                                         | Lhx8          | 1.51  | 0.957 | -1.02 | 0.994 | 1.96  | 0.413 | -1    | 0.929 | 2.06 | 0.030 |
| 1454629_at   | RIKEN cDNA A930037G23 gene                                                     | A930037G23Rik | 1.5   | 0.521 | 1.55  | 0.188 | 1.09  | 0.961 | 1.32  | 0.063 | 2.07 | 0.040 |
| 1447496_s_at | fibronectin type 3 and ankyrin repeat domains 1                                | Fank1         | -1.54 | 0.123 | -1.08 | 0.443 | 1.21  | 0.984 | 1.6   | 0.599 | 2.07 | 0.043 |
| 1422724_at   | male germ cell-associated kinase                                               | Mak           | 1.06  | 0.533 | 1.75  | 0.161 | 1.2   | 0.924 | -1.66 | 0.158 | 2.07 | 0.048 |
| 1459836_x_at | splicing factor 3b, subunit 2                                                  | Sf3b2         | -1.1  | 0.487 | -1.24 | 0.421 | 1.02  | 0.980 | -1.02 | 0.638 | 2.08 | 0.024 |
| 1439331_at   | RIKEN cDNA 4932439E07 gene                                                     | 4932439E07Rik | 2.62  | 0.355 | 1.12  | 0.644 | -1.58 | 0.044 | -1.41 | 0.268 | 2.09 | 0.020 |
| 1455638_at   | zinc finger protein 319                                                        | Zfp319        | 1.2   | 0.888 | 1.35  | 0.982 | 1.88  | 0.128 | 1.58  | 0.113 | 2.09 | 0.024 |
| 1457976_at   | RIKEN cDNA 2010002M12 gene                                                     | 2010002M12Rik | 1.26  | 0.640 | 1.27  | 0.626 | 1.1   | 0.837 | 1.3   | 0.329 | 2.1  | 0.012 |
| 1443387_at   | expressed sequence BB045044                                                    | BB045044      | -1.12 | 0.906 | -1.1  | 0.520 | 1.89  | 0.490 | 1.59  | 0.992 | 2.1  | 0.021 |
| 1432656_at   | RIKEN cDNA 3222402N08 gene                                                     | 3222402N08Rik | 1.52  | 0.221 | 2.01  | 0.041 | -1.22 | 0.047 | 1.16  | 0.656 | 2.11 | 0.036 |
| 1436875_at   | dynamitin 3                                                                    | Dnm3          | 1.19  | 0.798 | -1.22 | 0.192 | 1.01  | 0.765 | -1.43 | 0.206 | 2.11 | 0.043 |
| 1426152_a_at | kit ligand                                                                     | Kitl          | -1.27 | 0.340 | -1.34 | 0.116 | 1.13  | 0.784 | 1.1   | 0.489 | 2.11 | 0.035 |
| 1449032_at   | prolactin-like protein M                                                       | Prlpm         | -1.02 | 0.442 | 1.36  | 0.659 | 1.06  | 0.903 | 2.29  | 0.043 | 2.11 | 0.004 |



|              |                                                                                                   |                          |       |       |       |       |       |       |       |       |      |       |
|--------------|---------------------------------------------------------------------------------------------------|--------------------------|-------|-------|-------|-------|-------|-------|-------|-------|------|-------|
| 1455683_a_at | TBC1 domain family, member 8                                                                      | Tbc1d8                   | 1.12  | 0.392 | 1.01  | 0.371 | -1.03 | 0.913 | -1.28 | 0.282 | 2.11 | 0.019 |
| 1423004_at   | vasoactive intestinal peptide receptor 1                                                          | Vipr1                    | 1.73  | 0.381 | 1.41  | 0.215 | 1.11  | 0.724 | -1.09 | 0.640 | 2.11 | 0.039 |
| 1447572_at   | RIKEN cDNA 1700052122 gene                                                                        | RIKEN cDNA 1700052122Rik | 1.72  | 0.975 | 1.18  | 0.650 | 1.67  | 0.885 | 1.23  | 0.036 | 2.12 | 0.034 |
| 1418133_at   | B-cell leukemia/lymphoma 3                                                                        | Bcl3                     | 1.11  | 0.967 | 1.66  | 0.393 | 1.51  | 0.733 | 1.82  | 0.342 | 2.12 | 0.014 |
| 1432639_at   | RIKEN cDNA 4633401L03 gene                                                                        | 4633401L03Rik            | 1.39  | 0.766 | 1.84  | 0.725 | 1.88  | 0.046 | -1.24 | 0.347 | 2.13 | 0.026 |
| 1454563_at   | RIKEN cDNA 4930573C08 gene                                                                        | 4930573C08Rik            | -1.35 | 0.215 | -1.58 | 0.004 | 1.24  | 0.032 | -1.37 | 0.313 | 2.13 | 0.008 |
| 1455737_at   | RIKEN cDNA C030002B11 gene                                                                        | C030002B11Rik            | -1.96 | 0.021 | 1.25  | 0.825 | 3.02  | 0.085 | 1.2   | 0.876 | 2.13 | 0.011 |
| 1425261_at   | CCAAT/enhancer binding protein (C/EBP), gamma                                                     | Cebpg                    | -1.25 | 0.300 | -1.37 | 0.296 | 1.22  | 0.530 | -1.12 | 0.356 | 2.13 | 0.046 |
| 1448257_at   | solute carrier family 29 (nucleoside transporters), member 2                                      | Slc29a2                  | 1.25  | 0.891 | 1.23  | 0.159 | 2.59  | 0.073 | 1.32  | 0.071 | 2.13 | 0.044 |
| 1430391_a_at | ST8 alpha-N-acetyl-neuraminide alpha-2,8-sialyltransferase 4                                      | St8sia4                  | 1.01  | 0.535 | -2.36 | 0.127 | -1.73 | 0.112 | -1.31 | 0.239 | 2.13 | 0.046 |
| 1439472_at   | GCN1 general control of amino-acid synthesis 1-like 1 (yeast)                                     | Gcn11                    | 1.51  | 0.833 | -1.58 | 0.195 | 1.5   | 0.642 | -2.12 | 0.014 | 2.14 | 0.039 |
| 1435263_at   | transmembrane protein 106A                                                                        | Tmem106a                 | 1.46  | 0.759 | 1.64  | 0.187 | 1.01  | 0.770 | 1.33  | 0.060 | 2.14 | 0.040 |
| 1459818_x_at | zinc finger, MYM-type 3                                                                           | Zmym3                    | 1.09  | 0.575 | 1.36  | 0.715 | 2.11  | 0.635 | -1.14 | 0.736 | 2.14 | 0.020 |
| 1432824_at   | RIKEN cDNA 2900018N21 gene                                                                        | 2900018N21Rik            | -1.56 | 0.206 | -1.2  | 0.377 | -1.09 | 0.151 | 1.07  | 0.740 | 2.15 | 0.016 |
| 1424774_s_at | RIKEN cDNA 3230401I01 gene                                                                        | 3230401I01Rik            | 1.21  | 0.845 | 1.45  | 0.499 | 1.21  | 0.692 | -1.23 | 0.238 | 2.15 | 0.050 |
| 1445394_at   | RIKEN cDNA 4933409K07 gene                                                                        | 4933409K07Rik            | 1.56  | 0.981 | -1.34 | 0.169 | 1.34  | 0.704 | 1.45  | 0.343 | 2.15 | 0.048 |
| 1453798_at   | coiled-coil domain containing 93                                                                  | Ccdc93                   | -1.15 | 0.437 | 1.63  | 0.634 | -1.24 | 0.522 | -1.48 | 0.175 | 2.15 | 0.038 |
| 1443631_at   | Diacylglycerol kinase, beta                                                                       | Dgkb                     | -1.21 | 0.231 | -1.03 | 0.432 | 2.43  | 0.017 | 1.51  | 0.078 | 2.15 | 0.044 |
| 1442553_at   | microtubule-associated protein, RP/EB family, member 2                                            | Mapre2                   | 1.44  | 0.157 | 1.21  | 0.599 | -1.18 | 0.373 | -1.37 | 0.125 | 2.15 | 0.048 |
| 1453215_at   | ribonuclease, RNase A family, 10 (non-active)                                                     | Rnase10                  | 1.55  | 0.093 | 1.83  | 0.106 | 1.5   | 0.253 | -1.29 | 0.172 | 2.15 | 0.006 |
| 1445697_at   | Integrin beta 1 binding protein 1                                                                 | Itgb1bp1                 | 2.01  | 0.852 | 2.28  | 0.922 | 1.16  | 0.777 | 1.08  | 0.653 | 2.16 | 0.023 |
| 1457378_at   | Mitochondrial ribosomal protein L54                                                               | Mrpl54                   | 1.14  | 0.938 | 1.11  | 0.909 | 1.14  | 0.969 | 1.28  | 0.983 | 2.16 | 0.015 |
| 1447046_at   | DnaJ (Hsp40) related, subfamily B, member 13                                                      | Dnajb13                  | -1.36 | 0.475 | 1.58  | 0.467 | 1.88  | 0.347 | 2.6   | 0.162 | 2.17 | 0.026 |
| 1418499_a_at | potassium voltage-gated channel, Isk-related subfamily, gene 3                                    | Kcne3                    | 1.27  | 0.685 | 1.59  | 0.812 | 2.34  | 0.306 | -1.45 | 0.218 | 2.17 | 0.041 |
| 1420401_a_at | receptor (calcitonin) activity modifying protein 3                                                | Ramp3                    | 1.07  | 0.859 | 1.22  | 0.738 | 1.45  | 0.168 | 1.21  | 0.829 | 2.18 | 0.014 |
| 1451599_at   | sestrin 2                                                                                         | Sesn2                    | 5.82  | 0.769 | 7.79  | 0.373 | 1.07  | 0.616 | 2.03  | 0.311 | 2.18 | 0.005 |
| 1441579_at   | doublesex and mab-3 related transcription factor like family A1                                   | Dmrt1                    | -1.4  | 0.146 | 1.02  | 0.890 | -1.49 | 0.243 | 2.21  | 0.620 | 2.19 | 0.037 |
| 1426542_at   | endonuclease domain containing 1                                                                  | Endod1                   | 1.01  | 0.979 | 1.64  | 0.111 | 2.86  | 0.160 | 1.12  | 0.347 | 2.19 | 0.017 |
| 1445117_at   | Glycosyltransferase 28 domain containing 1                                                        | Glit28d1                 | -1.74 | 0.033 | -1.65 | 0.088 | 1.55  | 0.716 | -1.38 | 0.308 | 2.19 | 0.037 |
| 1443582_at   | similar to growth arrest-specific 2 like 2; GAS2-related protein                                  | RP23-249K18.2            | 1.02  | 0.476 | 1.44  | 0.529 | 1.5   | 0.533 | 1.08  | 0.696 | 2.2  | 0.003 |
| 1441445_at   | period homolog 3 (Drosophila)                                                                     | Per3                     | -1.45 | 0.153 | -1.16 | 0.302 | 1.12  | 0.755 | -1.1  | 0.125 | 2.22 | 0.037 |
| 1457051_at   | tripartite motif protein 27                                                                       | Trim27                   | 2.13  | 0.047 | 1.8   | 0.555 | 1.44  | 0.007 | 1.18  | 0.859 | 2.22 | 0.010 |
| 1424714_at   | aldolase 3, C isoform                                                                             | Aldoc                    | -1.1  | 0.470 | 2.38  | 0.472 | -1.2  | 0.279 | 1.4   | 0.913 | 2.23 | 0.033 |
| 1424627_at   | cystatin 12                                                                                       | Cst12                    | -2    | 0.065 | -1.28 | 0.336 | -1.27 | 0.357 | 1.37  | 0.852 | 2.23 | 0.010 |
| 1450311_at   | solute carrier family 8 (sodium/calcium exchanger), member 3                                      | Slc8a3                   | 2.18  | 0.126 | 1.56  | 0.052 | 1.55  | 0.421 | 1.74  | 0.410 | 2.23 | 0.039 |
| 1430679_at   | RIKEN cDNA 4933404O12 gene                                                                        | 4933404O12Rik            | -1.05 | 0.371 | -1.34 | 0.213 | 1.54  | 0.817 | 1.6   | 0.947 | 2.24 | 0.043 |
| 1437444_at   | protocadherin gamma subfamily C, 3                                                                | Pcdhgc3                  | 2.02  | 0.070 | 1.92  | 0.158 | 1.7   | 0.067 | 2.53  | 0.237 | 2.24 | 0.045 |
| 1428357_at   | RIKEN cDNA 2610019F03 gene                                                                        | 2610019F03Rik            | 1.54  | 0.613 | 1.93  | 0.693 | 1.87  | 0.062 | 1.6   | 0.369 | 2.25 | 0.040 |
| 1447550_at   | hypothetical protein LOC666892 /// hypothetical protein LOC671332                                 | LOC666892 /// LOI        | -1.03 | 0.494 | 1.14  | 0.695 | 1.24  | 0.148 | 1.24  | 0.090 | 2.25 | 0.002 |
| 1450342_at   | bone morphogenetic protein 8b                                                                     | Bmp8b                    | -1.3  | 0.138 | -1.42 | 0.183 | 1.72  | 0.289 | -1.83 | 0.054 | 2.26 | 0.038 |
| 1422175_at   | matrix metalloproteinase 1a (interstitial collagenase) /// similar to matrix metalloproteinase 1a | Mmp1a /// LOC672         | 2.01  | 0.403 | 3.04  | 0.366 | 2.14  | 0.354 | 2.69  | 0.427 | 2.26 | 0.002 |
| 1453552_at   | RIKEN cDNA 2310014F07 gene                                                                        | 2310014F07Rik            | 1.66  | 0.777 | 1.28  | 0.864 | 1.36  | 0.421 | -1.16 | 0.749 | 2.27 | 0.045 |
| 1444008_at   | H2A histone family, member Y2                                                                     | H2afy2                   | 2.25  | 0.969 | 2.04  | 0.829 | 1.72  | 0.181 | 1.12  | 0.245 | 2.27 | 0.019 |
| 1444336_at   | Potassium inwardly-rectifying channel, subfamily J, member 3                                      | Kcnj3                    | 1.15  | 0.791 | -1.24 | 0.614 | 1.65  | 0.747 | 2.14  | 0.715 | 2.27 | 0.027 |
| 1431891_at   | zinc finger, SWIM domain containing 5                                                             | Zswim5                   | -1.04 | 0.630 | 1.03  | 0.911 | -2.01 | 0.000 | 1.29  | 0.661 | 2.27 | 0.043 |
| 1438996_at   | gene model 118, (NCBI)                                                                            | Gm118                    | 2.04  | 0.099 | 2.72  | 0.134 | -1.27 | 0.342 | -1.29 | 0.226 | 2.28 | 0.006 |
| 1445565_at   | Histone 1, H1e                                                                                    | Hist1h1e                 | -1.24 | 0.384 | -1.36 | 0.277 | -1.31 | 0.267 | 1.24  | 0.334 | 2.28 | 0.018 |
| 1429905_at   | RIKEN cDNA 3110009O07 gene                                                                        | 3110009O07Rik            | -1.05 | 0.460 | 1.42  | 0.065 | 3.05  | 0.519 | 1.03  | 0.995 | 2.31 | 0.003 |
| 1444958_at   | expressed sequence C79017                                                                         | C79017                   | -1.23 | 0.274 | 1.54  | 0.243 | -2.05 | 0.072 | 1.04  | 0.987 | 2.32 | 0.047 |
| 1429381_x_at | immunoglobulin heavy chain (J558 family) /// similar to immunoglobulin heavy chain (J558 family)  | Igh-VJ558 /// LOC2       | 1.12  | 0.944 | -1.25 | 0.350 | -1.46 | 0.036 | 1.43  | 0.216 | 2.32 | 0.011 |
| 1457722_at   | killer cell lectin-like receptor subfamily B member 1F                                            | Klrb1f                   | -1.33 | 0.283 | -1.06 | 0.645 | -1.6  | 0.137 | -1.78 | 0.139 | 2.32 | 0.046 |
| 1458831_at   | NAD(P) dependent steroid dehydrogenase-like                                                       | Nsdhl                    | 1.18  | 0.704 | 1.74  | 0.245 | -1    | 0.507 | 1.16  | 0.514 | 2.32 | 0.013 |
| 1423170_at   | TAF7 RNA polymerase II, TATA box binding protein (TBP)-associated factor 7                        | Taf7                     | 1.47  | 0.511 | 1.44  | 0.354 | 2.97  | 0.085 | 1.32  | 0.152 | 2.32 | 0.035 |
| 1439110_at   | RIKEN cDNA A930012O16 gene                                                                        | A930012O16Rik            | -1.08 | 0.570 | -1.44 | 0.181 | -1.04 | 0.560 | -1.41 | 0.147 | 2.33 | 0.019 |
| 1458367_at   | gene model 94, (NCBI)                                                                             | Gm94                     | 1.45  | 0.880 | 1.95  | 0.287 | -1.13 | 0.493 | 2.23  | 0.196 | 2.33 | 0.026 |
| 1444003_at   | lung-inducible neuralized-related C3HC4 RING domain protein                                       | Lincr                    | 1.06  | 0.465 | -1    | 0.592 | 1.67  | 0.793 | 1.69  | 0.683 | 2.33 | 0.013 |
| 1449739_at   | Phosphatidylserine synthase 1                                                                     | Ptdss1                   | -1.86 | 0.347 | 1.39  | 0.412 | 1.61  | 0.617 | 1.13  | 0.489 | 2.33 | 0.023 |
| 1446769_at   | RIKEN cDNA 2810439F02 gene                                                                        | 2810439F02Rik            | 2.09  | 0.331 | 2.42  | 0.478 | 3.84  | 0.100 | 1.7   | 0.983 | 2.34 | 0.003 |

|              |                                                                            |               |       |       |       |       |       |       |       |       |      |       |
|--------------|----------------------------------------------------------------------------|---------------|-------|-------|-------|-------|-------|-------|-------|-------|------|-------|
| 1422552_at   | reprimin, TP53 dependent G2 arrest mediator candidate                      | Rprm          | 1.6   | 0.294 | 4.18  | 0.007 | 1.31  | 0.022 | 1.36  | 0.042 | 2.34 | 0.011 |
| 1457183_at   | solute carrier family 6 (neurotransmitter transporter, GABA), member 1     | Slc6a1        | 1.24  | 0.997 | 1.7   | 0.412 | 1.22  | 0.537 | 1.08  | 0.859 | 2.34 | 0.015 |
| 1459100_at   | expressed sequence AU015253                                                | AU015253      | 1.59  | 0.766 | 1.68  | 0.400 | 1.34  | 0.844 | -1.33 | 0.233 | 2.35 | 0.032 |
| 1456428_at   | Chemokine (C-X-C motif) ligand 15                                          | Cxcl15        | -1.49 | 0.196 | -1.47 | 0.193 | -1.13 | 0.180 | 1.25  | 0.797 | 2.36 | 0.038 |
| 1450300_at   | gamma-aminobutyric acid (GABA-C) receptor, subunit rho 1                   | Gabbr1        | -1.08 | 0.558 | -1.53 | 0.083 | -1.08 | 0.483 | 1.26  | 0.341 | 2.36 | 0.023 |
| 1455034_at   | Nuclear receptor subfamily 4, group A, member 2                            | Nr4a2         | 1.28  | 0.905 | 2.01  | 0.042 | 2.06  | 0.003 | 1.63  | 0.002 | 2.37 | 0.002 |
| 1427433_s_at | homeo box A3                                                               | Hoxa3         | 1.18  | 0.703 | -1    | 0.551 | 2.64  | 0.402 | -1.43 | 0.263 | 2.38 | 0.010 |
| 1443262_at   | mitochondrial ribosomal protein S14                                        | Mrps14        | 2.08  | 0.366 | 2.33  | 0.062 | -1.11 | 0.465 | -1.18 | 0.316 | 2.38 | 0.033 |
| 1434008_at   | sodium channel, type IV, beta                                              | Scn4b         | 1.77  | 0.629 | -1.03 | 0.479 | 1.99  | 0.747 | 1.57  | 0.439 | 2.38 | 0.012 |
| 1457255_x_at | Kinesin family member 5C                                                   | Kif5c         | 1.57  | 0.839 | 2.25  | 0.294 | 1.35  | 0.662 | -1.08 | 0.533 | 2.39 | 0.042 |
| 1443726_at   | SET and MYND domain containing 1                                           | Smyd1         | 2.55  | 0.930 | 3.47  | 0.418 | -1.17 | 0.375 | -1.21 | 0.152 | 2.39 | 0.001 |
| 1438280_at   | RIKEN cDNA 1700023L04 gene                                                 | 1700023L04Rik | 1.01  | 0.683 | -1.31 | 0.029 | -1.65 | 0.066 | 1.73  | 0.560 | 2.4  | 0.043 |
| 1432930_at   | RIKEN cDNA 4930453O09 gene                                                 | 4930453O09Rik | 1.94  | 0.876 | 2.66  | 0.846 | 1.46  | 0.891 | -2.09 | 0.020 | 2.4  | 0.039 |
| 1446191_at   | Abi gene family, member 3                                                  | Abi3          | 1.51  | 0.858 | 1.43  | 0.782 | 1.5   | 0.333 | 1.24  | 0.851 | 2.4  | 0.028 |
| 1458730_at   | BTB and CNC homology 2                                                     | Bach2         | -1.03 | 0.510 | 2.61  | 0.255 | 1.54  | 0.837 | 1.08  | 0.873 | 2.4  | 0.025 |
| 1425081_at   | zinc finger protein 286                                                    | Zfp286        | 1.7   | 0.788 | 1.12  | 0.522 | -1.39 | 0.243 | 1.35  | 0.176 | 2.4  | 0.022 |
| 1424961_at   | TAP binding protein-like                                                   | Tapbp1        | 1.69  | 0.812 | 1.42  | 0.800 | 1.48  | 0.383 | 1.57  | 0.248 | 2.41 | 0.028 |
| 1430209_at   | RIKEN cDNA 4930404H21 gene                                                 | 4930404H21Rik | 1.91  | 0.663 | 1.05  | 0.800 | -2.25 | 0.024 | -1.22 | 0.200 | 2.42 | 0.020 |
| 1419378_a_at | FXVD domain-containing ion transport regulator 2                           | Fxyd2         | 1.14  | 0.692 | 1.56  | 0.355 | -1.41 | 0.150 | -1.04 | 0.706 | 2.42 | 0.008 |
| 1442830_at   | Nucleolar and spindle associated protein 1                                 | Nusap1        | 4.27  | 0.164 | 1.23  | 0.130 | 1.15  | 0.494 | 1.84  | 0.654 | 2.42 | 0.019 |
| 1445326_at   | sidekick homolog 1 (chicken)                                               | Sdk1          | 2.07  | 0.846 | 3.82  | 0.154 | -1.93 | 0.135 | 1.57  | 0.517 | 2.42 | 0.023 |
| 1439952_at   | RIKEN cDNA 3110082M05 gene                                                 | 3110082M05Rik | 2.21  | 0.578 | 2.42  | 0.281 | 2.88  | 0.176 | 1.15  | 0.856 | 2.43 | 0.024 |
| 1435907_at   | neurexin II                                                                | Nrxn2         | 1.55  | 0.505 | 1.24  | 0.770 | 2.18  | 0.267 | 2.32  | 0.359 | 2.44 | 0.002 |
| 1452353_at   | G protein-coupled receptor 155                                             | Gpr155        | 1.47  | 0.670 | 1.35  | 0.628 | 2.24  | 0.101 | 1.97  | 0.008 | 2.45 | 0.011 |
| 1439322_at   | Protocadherin 9                                                            | Pcdh9         | 1.02  | 0.766 | 1.7   | 0.199 | 1.32  | 0.766 | -1.71 | 0.219 | 2.45 | 0.006 |
| 1427026_at   | myosin, heavy polypeptide 4, skeletal muscle                               | Myh4          | 2.05  | 0.221 | 2.11  | 0.140 | 1.27  | 0.792 | -1.44 | 0.183 | 2.46 | 0.008 |
| 1453563_at   | NmrA-like family domain containing 1                                       | Nmral1        | 1.15  | 0.842 | 1.56  | 0.093 | -1.15 | 0.618 | -1.55 | 0.161 | 2.46 | 0.032 |
| 1422982_at   | androgen receptor                                                          | Ar            | 1.39  | 0.560 | 1.7   | 0.111 | -1.17 | 0.381 | -1.03 | 0.711 | 2.47 | 0.025 |
| 1451942_x_at | killer cell lectin-like receptor subfamily A, member 20                    | Klra20        | 1.18  | 0.974 | 4.69  | 0.193 | 1.12  | 0.996 | 3.07  | 0.166 | 2.47 | 0.011 |
| 1416899_at   | undifferentiated embryonic cell transcription factor 1                     | Utf1          | 1.21  | 0.613 | 2.29  | 0.058 | -1.23 | 0.251 | 1.22  | 0.995 | 2.47 | 0.032 |
| 1436361_at   | vestigial like 2 homolog (Drosophila)                                      | Vgll2         | 1.8   | 0.044 | 1.77  | 0.932 | 1.72  | 0.253 | 3.03  | 0.069 | 2.47 | 0.024 |
| 1452804_at   | RIKEN cDNA 1700010A17 gene                                                 | 1700010A17Rik | 2.33  | 0.360 | -1.07 | 0.407 | 1.05  | 0.553 | 2.39  | 0.130 | 2.48 | 0.025 |
| 1437872_at   | cDNA sequence AB112350                                                     | AB112350      | 1.03  | 0.831 | -1.02 | 0.948 | 2.89  | 0.479 | 1.34  | 0.884 | 2.48 | 0.009 |
| 1444323_at   | cyclin D3                                                                  | Ccnd3         | 1.59  | 0.585 | 1.84  | 0.692 | 1.82  | 0.594 | -1.17 | 0.562 | 2.48 | 0.025 |
| 1458882_at   | serine (or cysteine) peptidase inhibitor, clade B, member 8                | Serpinb8      | -1.38 | 0.343 | 1.29  | 0.758 | 1.93  | 0.261 | 1.91  | 0.124 | 2.49 | 0.038 |
| 1458556_at   | Trinucleotide repeat containing 6C                                         | Tnrc6c        | 1.38  | 0.220 | 1.64  | 0.130 | -1    | 0.429 | 1.47  | 0.945 | 2.49 | 0.031 |
| 1439509_at   | RIKEN cDNA 2900008C10 gene                                                 | 2900008C10Rik | 1.14  | 0.846 | 1.66  | 0.072 | -1.1  | 0.593 | 1.08  | 0.619 | 2.5  | 0.017 |
| 1446975_at   | Castor homolog 1, zinc finger (Drosophila)                                 | Cas21         | -1.58 | 0.166 | -1.02 | 0.858 | -1.3  | 0.338 | 1.02  | 0.792 | 2.5  | 0.000 |
| 1428963_at   | RWD domain containing 2                                                    | Rwdd2         | 1.46  | 0.156 | 1.64  | 0.136 | 1.39  | 0.084 | 1.36  | 0.090 | 2.5  | 0.024 |
| 1422388_at   | vomerol nasal 1 receptor, C8                                               | V1rc8         | 1.18  | 0.601 | -1.05 | 0.534 | 1.67  | 0.814 | 1.16  | 0.651 | 2.5  | 0.015 |
| 1449038_at   | hydroxysteroid 11-beta dehydrogenase 1                                     | Hsd11b1       | 1.19  | 0.689 | 1.2   | 0.902 | 1.25  | 0.820 | 2.15  | 0.145 | 2.51 | 0.013 |
| 1421621_at   | RAS protein-specific guanine nucleotide-releasing factor 2                 | Rasgrf2       | 1.22  | 0.545 | 1.59  | 0.734 | 1.66  | 0.285 | 1.2   | 0.278 | 2.52 | 0.028 |
| 1429312_s_at | receptor tyrosine kinase-like orphan receptor 1                            | Ror1          | -1.06 | 0.670 | -1.01 | 0.666 | 1.46  | 0.980 | 1.17  | 0.729 | 2.52 | 0.011 |
| 1453103_at   | actin-binding LIM protein 1                                                | Ablim1        | -1    | 0.691 | -1.63 | 0.085 | 1.42  | 0.090 | 1.15  | 0.917 | 2.53 | 0.017 |
| 1460313_at   | olfactory receptor 2                                                       | Olf2          | 1.04  | 0.649 | -1.19 | 0.277 | 1.05  | 0.609 | -2.31 | 0.003 | 2.53 | 0.037 |
| 1422655_at   | patched homolog 2                                                          | Ptch2         | 1.53  | 0.984 | 1.63  | 0.919 | -1.03 | 0.577 | 1.99  | 0.162 | 2.53 | 0.023 |
| 1454108_at   | RIKEN cDNA 4930524O08 gene                                                 | 4930524O08Rik | 1.07  | 0.721 | 1.45  | 0.668 | 1.53  | 0.804 | -1.84 | 0.154 | 2.55 | 0.044 |
| 1444987_at   | Cathepsin B                                                                | Ctsb          | 3.39  | 0.119 | 1.08  | 0.595 | 1.69  | 0.334 | 1.32  | 0.766 | 2.55 | 0.038 |
| 1422757_at   | solute carrier family 5 (neutral amino acid transporters, system A), membe | Slc5a4b       | -1.59 | 0.198 | -1.8  | 0.220 | 2.11  | 0.243 | 1.65  | 0.299 | 2.55 | 0.004 |
| 1417877_at   | RIKEN cDNA 2310005P05 gene                                                 | 2310005P05Rik | 1.21  | 0.985 | 1.01  | 0.486 | -1.03 | 0.447 | -1.16 | 0.419 | 2.57 | 0.013 |
| 1451757_at   | cDNA sequence BC003883                                                     | BC003883      | 1.64  | 0.255 | 1.57  | 0.997 | -1.13 | 0.715 | 1.36  | 0.743 | 2.57 | 0.031 |
| 1438866_at   | glutamate receptor ionotropic, NMDA3A                                      | Grin3a        | 1.84  | 0.841 | 1.38  | 0.906 | 3.01  | 0.298 | 1.31  | 0.819 | 2.58 | 0.003 |
| 1457835_at   | hypothetical protein C920025J10                                            | C920025J10    | 1.8   | 0.645 | 1.46  | 0.341 | 1.7   | 0.624 | 1.11  | 0.397 | 2.59 | 0.005 |
| 1447938_at   | similar to 4933409K07Rik protein                                           | LOC545614     | 1.01  | 0.741 | 1.05  | 0.605 | -1.04 | 0.426 | 1.88  | 0.261 | 2.59 | 0.019 |
| 1451767_at   | neutrophil cytosolic factor 1                                              | Ncf1          | 1.08  | 0.434 | 1.71  | 0.039 | 1.29  | 0.694 | 1.78  | 0.604 | 2.6  | 0.008 |
| 1430913_at   | RIKEN cDNA 1810033M07 gene                                                 | 1810033M07Rik | 2.45  | 0.180 | 1.24  | 0.983 | 1.85  | 0.623 | 2.09  | 0.362 | 2.61 | 0.034 |
| 1456509_at   | RIKEN cDNA 1110032F04 gene                                                 | 1110032F04Rik | 2.28  | 0.142 | 2.31  | 0.225 | 1.34  | 0.411 | 1.26  | 0.770 | 2.62 | 0.024 |
| 1430730_at   | RIKEN cDNA 9430024F10 gene                                                 | 9430024F10Rik | -1.69 | 0.188 | -1.27 | 0.242 | 2.91  | 0.025 | -1.09 | 0.796 | 2.63 | 0.050 |

|              |                                                                                |                   |       |       |       |       |       |       |       |       |      |       |
|--------------|--------------------------------------------------------------------------------|-------------------|-------|-------|-------|-------|-------|-------|-------|-------|------|-------|
| 1451194_at   | aldolase 2, B isoform                                                          | Aldob             | 2.23  | 0.372 | 1.86  | 0.349 | 1.37  | 0.560 | -1.13 | 0.422 | 2.63 | 0.001 |
| 1438483_at   | nitric oxide synthase 1, neuronal                                              | Nos1              | 1.33  | 0.120 | 2.99  | 0.172 | 1.41  | 0.797 | 1.13  | 0.617 | 2.63 | 0.047 |
| 1450237_at   | deoxyribonuclease II beta                                                      | Dnase2b           | -1.39 | 0.290 | 1.64  | 0.130 | 2.6   | 0.077 | 1.31  | 0.352 | 2.64 | 0.009 |
| 1425728_at   | hypothetical gene Rp23-14f5.7                                                  | RP23-14F5.7       | 1.04  | 0.530 | 1.03  | 0.472 | -1.18 | 0.321 | -1.68 | 0.054 | 2.66 | 0.014 |
| 1443591_at   | distal-less homeobox 4                                                         | Dlx4              | 1.3   | 0.592 | 1.68  | 0.823 | 1.53  | 0.095 | 2.14  | 0.233 | 2.67 | 0.040 |
| 1441524_at   | cytoplasmic tyrosine kinase, Dscr28C related (Drosophila)                      | Tec               | 1.22  | 0.908 | 2.12  | 0.426 | 1.27  | 0.939 | 1.44  | 0.938 | 2.67 | 0.016 |
| 1458863_at   | RIKEN cDNA 6330415G19 gene                                                     | 6330415G19Rik     | 1.51  | 0.144 | 1.72  | 0.010 | 1.45  | 0.007 | 1.34  | 0.123 | 2.68 | 0.024 |
| 1451951_at   | Hypothetical protein LOC625794                                                 | LOC625794         | 2.23  | 0.256 | 2.82  | 0.114 | -1.44 | 0.308 | 1.63  | 0.148 | 2.69 | 0.044 |
| 1437966_at   | proline-rich transmembrane protein 3                                           | Prrt3             | -1.3  | 0.214 | 1.08  | 0.520 | -1.09 | 0.725 | 1.08  | 0.470 | 2.69 | 0.017 |
| 1429354_at   | thioesterase superfamily member 5                                              | Them5             | 2.14  | 0.964 | 1.74  | 0.969 | 1.43  | 0.790 | -1.19 | 0.117 | 2.69 | 0.010 |
| 1460715_x_at | Transcription factor CP2-like 1                                                | Tcfcp2l1          | -1.14 | 0.308 | 1.02  | 0.357 | 1.2   | 0.861 | -1.01 | 0.560 | 2.72 | 0.025 |
| 1460016_at   | transmembrane protein 164                                                      | Tmem164           | -1.23 | 0.195 | 1.08  | 0.732 | 1.9   | 0.506 | -1.12 | 0.399 | 2.72 | 0.050 |
| 1447742_at   | lysosomal-associated protein transmembrane 5                                   | Laptm5            | 2.04  | 0.434 | 1.27  | 0.456 | 1.64  | 0.069 | -1.96 | 0.184 | 2.73 | 0.042 |
| 1445504_at   | similar to Nucleolar phosphoprotein p130 (Nucleolar 130 kDa protein) (14C)     | LOC331392         | 2.28  | 0.245 | 3.02  | 0.273 | 1.65  | 0.193 | 1.21  | 0.598 | 2.73 | 0.029 |
| 1432118_at   | RIKEN cDNA 2410012E07 gene                                                     | 2410012E07Rik     | 1.35  | 0.488 | -1.04 | 0.442 | 1.7   | 0.331 | 1.04  | 0.374 | 2.77 | 0.043 |
| 1452514_a_at | kit oncogene                                                                   | Kit               | 1.43  | 0.694 | 1.19  | 0.506 | 1.68  | 0.385 | 1.62  | 0.072 | 2.77 | 0.006 |
| 1420065_at   | Transketolase-like 1                                                           | Tktl1             | 1.49  | 0.900 | -1.12 | 0.485 | -1.07 | 0.528 | 1.81  | 0.842 | 2.77 | 0.033 |
| 1432246_at   | RIKEN cDNA 4922502N22 gene                                                     | 4922502N22Rik     | -1.8  | 0.224 | -1.43 | 0.267 | 1.02  | 0.586 | 1.48  | 0.396 | 2.78 | 0.047 |
| 1432244_at   | RIKEN cDNA 4930507D10 gene                                                     | 4930507D10Rik     | -1.2  | 0.458 | -1.4  | 0.166 | -1.56 | 0.217 | 1.98  | 0.821 | 2.78 | 0.032 |
| 1445296_at   | DNA segment, Chr 7, ERATO Doi 715, expressed                                   | D7Erd715e         | 1.57  | 0.583 | 1.17  | 0.317 | 1.72  | 0.950 | 1.87  | 0.906 | 2.78 | 0.027 |
| 1459668_at   | TRAF family member-associated Nf-kappa B activator                             | Tank              | 1.73  | 0.606 | 1.43  | 0.872 | 2.24  | 0.575 | 1.39  | 0.181 | 2.78 | 0.034 |
| 1422387_at   | vomeronasal 1 receptor, C2                                                     | V1rc2             | 1.91  | 0.617 | -1.01 | 0.466 | 1.65  | 0.903 | 3.5   | 0.294 | 2.8  | 0.045 |
| 1453335_a_at | spermatogenesis associated 3                                                   | Spata3            | -1.25 | 0.396 | -1.66 | 0.213 | 2.35  | 0.699 | -1.83 | 0.204 | 2.81 | 0.027 |
| 1447956_at   | expressed sequence C76614                                                      | C76614            | -1.44 | 0.264 | -1.09 | 0.537 | -1.39 | 0.237 | 1.23  | 0.792 | 2.83 | 0.033 |
| 1460528_at   | RIKEN cDNA 4930413G21 gene /// hypothetical protein LOC668574 /// hyj          | 4930413G21Rik /// | 1.06  | 0.628 | 1.83  | 0.845 | -1.66 | 0.106 | 2.41  | 0.598 | 2.84 | 0.044 |
| 1427292_at   | immunoglobulin lambda chain, variable 1                                        | Igl-V1            | -1.9  | 0.050 | -3.15 | 0.016 | 1.08  | 0.664 | 2.86  | 0.435 | 2.85 | 0.005 |
| 1420706_at   | P140 gene                                                                      | P140              | -1.42 | 0.417 | -1.41 | 0.050 | -1.28 | 0.418 | -1.61 | 0.247 | 2.85 | 0.009 |
| 1431370_at   | RIKEN cDNA 4930512B01 gene                                                     | 4930512B01Rik     | 1.41  | 0.759 | 1.62  | 0.505 | -1.25 | 0.109 | 1.94  | 0.570 | 2.86 | 0.010 |
| 1438707_at   | ATPase type 13A4                                                               | Atp13a4           | 1.24  | 0.514 | 1.26  | 0.303 | 1.01  | 0.402 | 2.9   | 0.061 | 2.88 | 0.006 |
| 1460493_at   | RIKEN cDNA 4921506J03 gene                                                     | 4921506J03Rik     | 1.06  | 0.896 | 1.81  | 0.099 | -1.1  | 0.444 | 1.51  | 0.659 | 2.93 | 0.046 |
| 1418797_at   | membrane-spanning 4-domains, subfamily A, member 8A                            | Ms4a8a            | -1.33 | 0.155 | 1.93  | 0.237 | 2.38  | 0.490 | -1.18 | 0.304 | 2.94 | 0.013 |
| 1424303_at   | DEP domain containing 7                                                        | Depdc7            | 1.07  | 0.576 | 1.07  | 0.288 | 3.42  | 0.033 | 1.98  | 0.020 | 2.96 | 0.026 |
| 1426174_s_at | Immunoglobulin heavy chain (gamma polypeptide)                                 | Ighg              | 1.2   | 0.846 | 1.08  | 0.692 | 1.11  | 0.424 | 1.48  | 0.902 | 2.96 | 0.014 |
| 1445247_at   | RIKEN cDNA C530044C16 gene                                                     | C530044C16Rik     | 1.08  | 0.603 | 1.41  | 0.628 | 1.02  | 0.566 | -1.03 | 0.697 | 2.97 | 0.028 |
| 1437094_x_at | dynein, axonemal, intermediate chain 1                                         | Dnaic1            | 1.01  | 0.490 | -2.09 | 0.251 | 1.21  | 0.992 | 2.03  | 0.699 | 2.99 | 0.037 |
| 1455963_at   | RIKEN cDNA 6332401O19 gene                                                     | 6332401O19Rik     | 1.17  | 0.739 | 2.45  | 0.219 | 1.77  | 0.506 | 1.66  | 0.782 | 3.02 | 0.015 |
| 1431554_a_at | annexin A9                                                                     | Anxa9             | 1.27  | 0.463 | -1.03 | 0.749 | -1.19 | 0.370 | 2.09  | 0.663 | 3.02 | 0.011 |
| 1446370_at   | RAB11 family interacting protein 4 (class II)                                  | Rab11fip4         | 2.25  | 0.396 | -1.05 | 0.548 | 1.45  | 0.804 | 2.01  | 0.263 | 3.02 | 0.030 |
| 1442797_x_at | CKLF-like MARVEL transmembrane domain containing 2A                            | Cmtm2a            | 1.18  | 0.850 | 1.21  | 0.601 | 1.64  | 0.805 | 2.02  | 0.165 | 3.05 | 0.008 |
| 1451716_at   | v-maf musculoaponeurotic fibrosarcoma oncogene family, protein B (avian MafB)  | MafB              | 2.53  | 0.165 | 2.33  | 0.112 | 1.31  | 0.088 | 1.15  | 0.905 | 3.05 | 0.025 |
| 1458770_at   | DNA segment, Chr 11, ERATO Doi 4, expressed                                    | D11Erd4e          | 1.36  | 0.770 | 1.16  | 0.429 | 1.85  | 0.761 | -1.37 | 0.042 | 3.06 | 0.046 |
| 1449247_at   | actin-related protein T2                                                       | Actrt2            | -1.08 | 0.836 | 1.32  | 0.722 | 1.96  | 0.050 | 1.52  | 0.311 | 3.07 | 0.001 |
| 1446279_at   | Neuronal growth regulator 1                                                    | Negr1             | -1.34 | 0.151 | -1.22 | 0.391 | 2.1   | 0.283 | 2.85  | 0.007 | 3.1  | 0.028 |
| 1459295_at   | Latrophilin 3                                                                  | Lphn3             | 1.43  | 0.964 | 1.13  | 0.944 | 1.14  | 0.483 | 2.69  | 0.153 | 3.11 | 0.025 |
| 1420249_s_at | chemokine (C-C motif) ligand 6                                                 | Ccl6              | 1.5   | 0.315 | 1.49  | 0.208 | -1    | 0.656 | 1.45  | 0.001 | 3.12 | 0.042 |
| 1428960_at   | RIKEN cDNA 4933434I06 gene                                                     | 4933434I06Rik     | 2.63  | 0.934 | 1.71  | 0.792 | 1.29  | 0.700 | 1.11  | 0.644 | 3.13 | 0.042 |
| 1421660_at   | sodium channel, voltage-gated, type IX, alpha /// similar to sodium channel    | Scn9a /// LOC671E | 2.97  | 0.673 | 1.47  | 0.723 | -1.05 | 0.482 | 1.73  | 0.885 | 3.14 | 0.025 |
| 1452619_a_at | ATP/GTP binding protein-like 3                                                 | Aagl3             | 2.95  | 0.915 | 1.13  | 0.987 | 1.08  | 0.891 | 2.2   | 0.231 | 3.16 | 0.034 |
| 1451755_a_at | apolipoprotein B editing complex 1                                             | Apobec1           | -1.08 | 0.962 | 2.54  | 0.007 | 2.02  | 0.456 | 2.17  | 0.140 | 3.17 | 0.039 |
| 1455807_at   | testis-specific protein, Y-encoded-like 5                                      | Tspyl5            | -1.1  | 0.433 | 1.39  | 0.643 | 1.75  | 0.902 | 2.65  | 0.045 | 3.18 | 0.013 |
| 1440352_at   | region containing RIKEN cDNA 1700028E10 gene; hypothetical protein AEL         | LOC625175         | 1.68  | 0.781 | 1.6   | 0.981 | -1.3  | 0.243 | -1.98 | 0.005 | 3.2  | 0.022 |
| 1446993_at   | Perilipin                                                                      | Plin              | 1.92  | 0.634 | 2.03  | 0.457 | 2.76  | 0.063 | 1.03  | 0.934 | 3.2  | 0.031 |
| 1453168_at   | RIKEN cDNA 1700029J07 gene                                                     | 1700029J07Rik     | 1.66  | 0.897 | 1.08  | 0.604 | 1.57  | 0.712 | 1.76  | 0.743 | 3.21 | 0.025 |
| 1436565_at   | CEA-related cell adhesion molecule 10                                          | Ceacam10          | 1.01  | 0.891 | -1    | 0.989 | 1.81  | 0.641 | 1.03  | 0.522 | 3.21 | 0.045 |
| 1428573_at   | chimerin (chimaerin) 2                                                         | Chn2              | -1.21 | 0.323 | 1.92  | 0.688 | 1.92  | 0.373 | 2.61  | 0.368 | 3.27 | 0.044 |
| 1439527_at   | Expressed sequence BB114106                                                    | BB114106          | 1.71  | 0.281 | 2.18  | 0.101 | 2.19  | 0.769 | -1.36 | 0.224 | 3.28 | 0.045 |
| 1418158_at   | transformation related protein 63                                              | Trp63             | 1.62  | 0.770 | 1.6   | 0.690 | 2.06  | 0.197 | -1.01 | 0.759 | 3.29 | 0.014 |
| 1420235_at   | biphenyl hydrolase-like (serine hydrolase, breast epithelial mucin-associated) | Bphl              | -1.23 | 0.466 | -1.31 | 0.429 | 1.18  | 0.956 | 3.07  | 0.272 | 3.3  | 0.039 |

|              |                                                                                                             |                    |       |       |       |       |       |       |       |       |      |       |
|--------------|-------------------------------------------------------------------------------------------------------------|--------------------|-------|-------|-------|-------|-------|-------|-------|-------|------|-------|
| 1449581_at   | EMI domain containing 1                                                                                     | Emid1              | 1.4   | 0.055 | 1.74  | 0.100 | -1.59 | 0.005 | 1.08  | 0.892 | 3.3  | 0.015 |
| 1438468_at   | preferentially expressed antigen in melanoma like 4 /// preferentially expressed antigen in melanoma like 4 | Pramel4 /// Pramel | -1.33 | 0.304 | -1.17 | 0.416 | 1.17  | 0.738 | 1.1   | 0.118 | 3.31 | 0.006 |
| 1431706_at   | RAN binding protein 5                                                                                       | Ranbp5             | 1.43  | 0.840 | -1.04 | 0.558 | -1.48 | 0.074 | -1.13 | 0.236 | 3.32 | 0.022 |
| 1433237_at   | RIKEN cDNA 3830422I06 gene                                                                                  | 3830422I06Rik      | 1.95  | 0.060 | -1.11 | 0.675 | 1.3   | 0.938 | 2.99  | 0.274 | 3.34 | 0.017 |
| 1431115_at   | TGF $\beta$ -induced factor 2                                                                               | Tgif2              | 2.04  | 0.586 | 1.61  | 0.077 | 2.11  | 0.902 | 2.58  | 0.250 | 3.34 | 0.046 |
| 1420571_at   | prolactin-like protein B                                                                                    | Prllpb             | 1.56  | 0.434 | -1.15 | 0.681 | 2.84  | 0.867 | 1.23  | 0.621 | 3.35 | 0.014 |
| 1449941_at   | myosin IE                                                                                                   | Myo1e              | 1.13  | 0.746 | 1.85  | 0.755 | 1.58  | 0.753 | 1.81  | 0.796 | 3.36 | 0.005 |
| 1443313_at   | RIKEN cDNA A530058N18 gene                                                                                  | A530058N18Rik      | -1.07 | 0.451 | -1.09 | 0.429 | 1.88  | 0.469 | -1.06 | 0.700 | 3.38 | 0.017 |
| 1456595_x_at | growth hormone                                                                                              | Gh                 | 1.29  | 0.859 | -1.16 | 0.363 | -1.49 | 0.103 | -1.08 | 0.507 | 3.44 | 0.012 |
| 1429975_at   | RIKEN cDNA 4931432M23 gene /// similar to plasma kallikrein-like protein                                    | 4931432M23Rik ///  | 1.5   | 0.877 | 2.03  | 0.445 | -1.49 | 0.096 | 2.81  | 0.610 | 3.45 | 0.016 |
| 1459755_x_at | RIKEN cDNA 1700082C02 gene                                                                                  | 1700082C02Rik      | -1.04 | 0.737 | -1.41 | 0.291 | 3.35  | 0.327 | 3.3   | 0.224 | 3.48 | 0.027 |
| 1418930_at   | chemokine (C-X-C motif) ligand 10                                                                           | Cxcl10             | -1.15 | 0.348 | 1.43  | 0.721 | 1.71  | 0.929 | 1.29  | 0.053 | 3.51 | 0.015 |
| 1431695_at   | rabphilin 3A-like (without C2 domains)                                                                      | Rph3al             | 1.32  | 0.686 | 1.24  | 0.389 | -1.43 | 0.132 | 1.25  | 0.805 | 3.51 | 0.031 |
| 1445896_at   | RIKEN cDNA 2810433D01 gene                                                                                  | 2810433D01Rik      | 1.2   | 0.749 | 1.27  | 0.999 | -1.5  | 0.238 | -1.35 | 0.039 | 3.52 | 0.016 |
| 1441875_at   | RIKEN cDNA 1700063J08 gene                                                                                  | 1700063J08Rik      | 2.22  | 0.164 | 1.23  | 0.555 | 2.06  | 0.525 | 1.06  | 0.570 | 3.55 | 0.010 |
| 1451694_at   | tubulin tyrosine ligase-like family, member 3                                                               | Ttl3               | 2.93  | 0.311 | 1.98  | 0.110 | 1.14  | 0.767 | -1.57 | 0.103 | 3.6  | 0.022 |
| 1437880_at   | ladybird homeobox 1 homolog (Drosophila) corepressor 1                                                      | Lbxcor1            | 1.89  | 0.859 | 1.29  | 0.650 | -1.91 | 0.009 | -1.33 | 0.278 | 3.61 | 0.020 |
| 1447884_x_at | RIKEN cDNA 1300010M03 gene                                                                                  | 1300010M03Rik      | 1.26  | 0.498 | 2.33  | 0.145 | 2.1   | 0.234 | 2.19  | 0.150 | 3.62 | 0.019 |
| 1420930_s_at | catenin (cadherin associated protein), alpha-like 1                                                         | Cttnal1            | 1.2   | 0.532 | 1.19  | 0.749 | 1.07  | 0.637 | 1.53  | 0.140 | 3.64 | 0.035 |
| 1433526_at   | kelch-like 8 (Drosophila)                                                                                   | Klh8               | 3.96  | 0.928 | 3.58  | 0.144 | 1.26  | 0.588 | 2.61  | 0.093 | 3.64 | 0.030 |
| 1452893_s_at | RIKEN cDNA 1110065P19 gene /// RIKEN cDNA 2310040A07 gene                                                   | 1110065P19Rik ///  | -1.35 | 0.129 | -1.03 | 0.538 | 1.19  | 0.817 | -1.12 | 0.203 | 3.65 | 0.019 |
| 1455755_at   | gene model 88, (NCBI)                                                                                       | Gm88               | -1.78 | 0.191 | 1.37  | 0.608 | 2.15  | 0.274 | 2.15  | 0.658 | 3.65 | 0.017 |
| 1442355_at   | hypothetical LOC546100                                                                                      | LOC546100          | -1.38 | 0.153 | 1.17  | 0.865 | 1.57  | 0.444 | 1.76  | 0.815 | 3.65 | 0.001 |
| 1427459_at   | carboxypeptidase N, polypeptide 2                                                                           | Cpn2               | 2.8   | 0.015 | 1.22  | 0.338 | 2.74  | 0.162 | -1.22 | 0.252 | 3.66 | 0.010 |
| 1422267_at   | forkhead box B2                                                                                             | Foxb2              | 1.67  | 0.138 | 1.4   | 0.810 | 2.28  | 0.571 | 1.44  | 0.124 | 3.71 | 0.005 |
| 1418807_at   | RIKEN cDNA 3110070M22 gene                                                                                  | 3110070M22Rik      | 1.04  | 0.700 | 1.08  | 0.710 | -1.18 | 0.209 | -1.28 | 0.107 | 3.83 | 0.048 |
| 1417837_at   | pleckstrin homology-like domain, family A, member 2                                                         | Phlda2             | 1.22  | 0.775 | 1.16  | 0.736 | 1.1   | 0.647 | 1.94  | 0.276 | 3.88 | 0.029 |
| 1440236_at   | RIKEN cDNA A830039H05 gene                                                                                  | A830039H05Rik      | 1.5   | 0.571 | -1.57 | 0.268 | 1.91  | 0.145 | -1.06 | 0.553 | 3.91 | 0.021 |
| 1443497_at   | Ankyrin repeat and BTB (POZ) domain containing 2                                                            | Abtb2              | -1.38 | 0.027 | -1.06 | 0.895 | 1.5   | 0.772 | 1.32  | 0.443 | 3.96 | 0.004 |
| 1452552_at   | neoplastic progression 2                                                                                    | Npn2               | 2.01  | 0.566 | 11.69 | 0.000 | 3.34  | 0.102 | 7.33  | 0.002 | 3.96 | 0.024 |
| 1442885_at   | SREBP cleavage activating protein                                                                           | Scap               | 1.08  | 0.863 | 3.33  | 0.354 | 1.94  | 0.127 | 2.04  | 0.497 | 3.98 | 0.025 |
| 1419876_at   | RIKEN cDNA 2810449G22 gene                                                                                  | 2810449G22Rik      | -1.67 | 0.059 | -1.83 | 0.171 | 1.96  | 0.383 | 1.28  | 0.461 | 4.05 | 0.014 |
| 1455835_at   | Ribosomal protein S16                                                                                       | Rps16              | -1.53 | 0.156 | -1.67 | 0.131 | -1.72 | 0.170 | 1.3   | 0.726 | 4.08 | 0.001 |
| 1418619_at   | intercellular adhesion molecule 5, telencephalin                                                            | Icam5              | 1.55  | 0.730 | 2.6   | 0.144 | 3.75  | 0.034 | 1.61  | 0.517 | 4.1  | 0.014 |
| 1436561_at   | suppressor of variegation 3-9 homolog 2 (Drosophila)                                                        | Suv39h2            | 1.35  | 0.692 | 1.66  | 0.881 | 1.84  | 0.938 | -1.35 | 0.338 | 4.11 | 0.032 |
| 1430324_x_at | RIKEN cDNA 1700049E17 gene /// similar to Spetex-2C protein                                                 | 1700049E17Rik ///  | 1.76  | 0.886 | 1.52  | 0.729 | -1.22 | 0.277 | 1.5   | 0.829 | 4.41 | 0.038 |
| 1434918_at   | SRY-box containing gene 6                                                                                   | Sox6               | 2.29  | 0.630 | 2.1   | 0.707 | 1.63  | 0.943 | 1.22  | 0.904 | 4.44 | 0.003 |
| 1432653_at   | RIKEN cDNA 1700008H02 gene                                                                                  | 1700008H02Rik      | 1.41  | 0.385 | 1.58  | 0.591 | 1.51  | 0.727 | 1.09  | 0.692 | 4.7  | 0.020 |
| 1430935_at   | RIKEN cDNA 4933413G19 gene                                                                                  | 4933413G19Rik      | 1.39  | 0.949 | -1.42 | 0.128 | 2.46  | 0.904 | 1.86  | 0.711 | 4.79 | 0.044 |
| 1451697_a_at | Ellis van Creveld gene homolog (human)                                                                      | Evc                | 1.36  | 0.385 | 1.34  | 0.266 | 1.66  | 0.499 | 1.69  | 0.463 | 4.79 | 0.035 |
| 1423542_at   | kallikrein 7 (chymotryptic, stratum corneum)                                                                | Klk7               | 1.14  | 0.359 | 2.61  | 0.973 | 1.35  | 0.388 | 1.44  | 0.759 | 4.98 | 0.007 |

**Supplemental table 6. Expression profiles of genes (red and green color indicate up- and down-regulated genes respectively) associated with over-represented biological processes in irradiated cells and with natural aging (kidney, liver, lung and spleen) as compared to corresponding controls.**

**Response to DNA damage**

| code         | Gene Title                                                             | Gene Symbo | Kidney | Liver | Lung  | Spleen | WT_0.6J | WT_4J | XPA_0.6J | CSB_0.6J | DKO_0.6J |
|--------------|------------------------------------------------------------------------|------------|--------|-------|-------|--------|---------|-------|----------|----------|----------|
| 1421220_at   | ankyrin repeat domain 17                                               | Ankrd17    | 1.68   | 1.05  | 1.18  | -1.29  | 2.01    | 3.7   | 1.31     | -1.17    | -1.13    |
| 1451417_at   | breast cancer 1                                                        | Brca1      | 1.06   | 2.00  | 2.25  | 3.57   | 2.74    | 3.54  | 1.17     | 1.12     | 1.15     |
| 1450677_at   | checkpoint kinase 1 homolog (S. pombe)                                 | Chek1      | 1.03   | 1.07  | 1.02  | 3.08   | 1.68    | 2.07  | 1.17     | 1.05     | 1.19     |
| 1423877_at   | chromatin assembly factor 1, subunit B (p60)                           | Chaf1b     | 1.03   | -1.43 | 1.21  | 2.47   | 1.17    | 1.2   | 1.15     | 1.21     | 1.07     |
| 1456280_at   | claspin homolog (Xenopus laevis)                                       | Clsn       | -1.40  | 1.18  | 1.01  | 4.50   | 1.25    | 1.58  | 1.11     | 1.08     | 1.16     |
| 1424638_at   | cyclin-dependent kinase inhibitor 1A (P21)                             | Cdkn1a     | 1.25   | 1.01  | 1.01  | 1.11   | 1.16    | 1.69  | 1.25     | 1.21     | 1.29     |
| 1441595_at   | Excision repair cross-compl/ting rodent repair deficiency, compl/tatio | Csb        | -1.34  | 1.08  | 1.21  | 1.37   | 3.12    | 2.55  | 1.81     | 2.24     | 1.29     |
| 1418026_at   | exonuclease 1                                                          | Exo1       | 1.36   | -1.21 | 1.23  | 3.10   | 1.14    | 1.54  | 1.33     | 1.42     | 1.15     |
| 1421731_a_at | flap structure specific endonuclease 1                                 | Fen1       | 1.52   | 1.47  | 1.92  | 3.31   | 1.18    | 1.56  | 1.28     | 1.25     | 1.27     |
| 1417572_at   | N-methylpurine-DNA glycosylase                                         | Mpg        | 1.30   | 1.09  | -1.04 | 1.22   | 1.86    | 2.7   | 1.51     | 1.15     | 1.44     |
| 1417947_at   | proliferating cell nuclear antigen                                     | Pcna       | -1.06  | 1.11  | 1.05  | 1.51   | 1.36    | 1.57  | 1.15     | 1.16     | 1.13     |
| 1421196_at   | protein tyrosine phosphatase, non-receptor type 11                     | Ptpn11     | 1.02   | -1.67 | 1.31  | 1.11   | 1.78    | 1.75  | -1.03    | 1.09     | 1.05     |
| 1448414_at   | RAD1 homolog (S. pombe)                                                | Rad1       | 1.28   | -1.06 | 1.24  | 1.55   | 2.25    | 2.25  | 1.24     | 1.22     | 1.07     |
| 1453623_a_at | RAD23a homolog (S. cerevisiae)                                         | Rad23a     | 1.09   | -1.44 | 1.69  | 1.70   | 2.58    | 2.11  | 1.24     | 1.08     | 1.16     |
| 1448899_s_at | RAD51 associated protein 1                                             | Rad51ap1   | 1.05   | 1.51  | 1.48  | 3.85   | 1.21    | 1.38  | 1.06     | 1.22     | 1.21     |
| 1450862_at   | RAD54 like (S. cerevisiae)                                             | Rad54l     | -1.07  | 1.72  | 1.44  | 2.89   | 1.49    | 1.51  | 1.04     | 1.28     | -1.09    |
| 1452917_at   | replication factor C (activator 1) 5                                   | Rfc5       | 1.23   | -1.01 | 1.69  | 1.67   | 1.17    | 1.35  | 1.2      | 1.16     | 1.2      |
| 1449578_at   | suppressor of Ty 16 homolog (S. cerevisiae)                            | Supt16h    | 1.01   | 1.05  | -1.16 | 1.55   | 3.86    | 2.9   | 1.56     | 1.27     | 1.15     |
| 1417754_at   | topoisomerase I binding, arginine/serine-rich                          | Topors     | 1.18   | -1.10 | 1.01  | 1.36   | 1.12    | 1.32  | 1        | 1.15     | 1.23     |
| 1424492_at   | transient receptor potential cation channel, C2                        | Trpc2      | 1.01   | -1.12 | 1.33  | 1.09   | -1.03   | 1.41  | -1.1     | 1.28     | 1.73     |
| 1415810_at   | ubiquitin-like, containing PHD and RING finger domains, 1              | Uhrf1      | 1.11   | 1.41  | 2.44  | 3.26   | 1.18    | 1.64  | 1.21     | 1.04     | 1.2      |
| 1455335_at   | X-ray repair compl/ting def/tive repair in Chin. hamster cells 2       | Xrcc2      | 1.02   | 1.09  | -1.00 | 1.49   | 1.14    | 1.57  | 1.46     | 1.01     | 1.2      |

**Apoptosis**

| code         | Gene Title                                            | Gene Symbo | Kidney | Liver | Lung | Spleen | WT_0.6J | WT_4J | XPA_0.6J | CSB_0.6J | DKO_0.6J |
|--------------|-------------------------------------------------------|------------|--------|-------|------|--------|---------|-------|----------|----------|----------|
| 1431142_s_at | apoptosis-inducing factor (AIF)-like inducer of death | Amid       | 1.27   | -1.94 | 1.14 | 1.53   | 2.39    | 2.07  | 1.32     | 1.25     | 1.67     |
| 1424278_a_at | baculoviral IAP repeat-containing 5                   | Birc5      | 1.36   | 1.22  | 1.62 | 4.85   | 1.04    | 1.17  | 1.04     | 1.1      | 1.19     |
| 1448525_a_at | BCL2/adenovirus E1B interacting protein 3-like        | Bnip3l     | 1.15   | -1.07 | 1.07 | 1.61   | 1.75    | 1.98  | 1.23     | 1.06     | 1.07     |
| 1434748_at   | cytoskeleton associated protein 2                     | Ckap2      | 1.94   | 1.15  | 1.75 | 4.69   | 1.18    | 1.6   | 1.21     | -1.02    | 1.29     |
| 1421397_a_at | leucine-rich and death domain containing              | Lrdd       | 1.10   | 1.26  | 1.11 | 2.01   | 1.6     | 3.14  | 1.22     | 1.46     | 1.45     |
| 1448787_at   | modulator of apoptosis 1                              | Moap1      | 1.08   | -1.21 | 1.16 | 1.52   | 1.09    | 1.32  | 1.15     | 1.12     | 1.18     |

|            |                                                               |           |      |       |       |       |      |      |      |      |      |
|------------|---------------------------------------------------------------|-----------|------|-------|-------|-------|------|------|------|------|------|
| 1416406_at | phosphoprotein enriched in astrocytes 15                      | Pea15     | 1.18 | 1.26  | -1.43 | 1.06  | 1.02 | 1.13 | 1.15 | 1.06 | 1.18 |
| 1460642_at | Tnf receptor associated factor 4                              | Traf4     | 1.21 | -1.17 | 1.29  | 1.47  | 1.67 | 2.39 | 1.21 | 1.43 | 1.48 |
| 1417754_at | topoisomerase I binding, arginine/serine-rich                 | Topors    | 1.18 | -1.10 | 1.01  | 1.36  | 1.12 | 1.32 | 1    | 1.15 | 1.23 |
| 1416927_at | transformation related protein 53 inducible nuclear protein 1 | Trp53inp1 | 1.21 | -1.19 | 1.22  | 1.19  | 1.13 | 2.95 | 1.08 | 1.78 | 1.83 |
| 1433699_at | tumor necrosis factor, alpha-induced protein 3                | Tnfaip3   | 1.07 | 1.54  | 1.49  | -1.58 | 1.12 | 1.2  | 1.24 | 1.2  | 1.1  |

### Immune responses

| code         | Gene Title                                                  | Gene Symbo | Kidney | Liver | Lung  | Spleen | WT_0.6J/0. | WT_4J/0J | (PA_0.6J/0; | SB_0.6J_ | ODKO_0.6/0J |
|--------------|-------------------------------------------------------------|------------|--------|-------|-------|--------|------------|----------|-------------|----------|-------------|
| 1431197_at   | ADP-ribosylation factor-like 6 interacting protein 2        | Arl6ip2    | -1.07  | 1.01  | 1.45  | 1.73   | 4.23       | 3.95     | 1.07        | 1.16     | -1.12       |
| 1453393_a_at | carbohydrate (chondroitin 6/keratan) sulfotransferase 4     | Chst4      | -1.50  | 1.20  | 1.40  | 1.10   | 2.49       | 2.35     | -1.41       | -1.21    | 2.98        |
| 1419209_at   | chemokine (C-X-C motif) ligand 1                            | Cxcl1      | 1.03   | 14.59 | 1.33  | -1.18  | 1.36       | 2.12     | 1.44        | 1.23     | 1.68        |
| 1448823_at   | chemokine (C-X-C motif) ligand 12                           | Cxcl12     | 1.51   | 1.25  | 1.31  | -1.26  | 2.32       | 1.81     | -1.26       | -1.1     | 1.05        |
| 1451702_at   | CKLF-like MARVEL transmembrane domain containing 7          | Cmtm7      | 1.34   | 1.82  | 1.26  | -1.40  | -1.07      | 1.29     | 1           | 1.33     | 1.19        |
| 1417876_at   | Fc receptor, IgG, high affinity I                           | Fcgr1      | 2.23   | 1.71  | 1.26  | 2.21   | 2.38       | 3.06     | -1.29       | 1.35     | 1.24        |
| 1424007_at   | growth differentiation factor 10                            | Gdf10      | 1.82   | 1.32  | 1.07  | 1.05   | 1.38       | 1.46     | 1.35        | -2.22    | 1.78        |
| 1422527_at   | histocompatibility 2, class II, locus DMA                   | H2-DMA     | 2.10   | 1.41  | 1.95  | -1.63  | 1.2        | 1.67     | -1.09       | 1        | 1.37        |
| 1419455_at   | interleukin 10 receptor, beta                               | Il10rb     | 1.03   | 1.61  | 1.12  | -1.38  | 1.67       | 1.91     | 1.28        | 1.2      | 1.31        |
| 1417638_at   | left right determination factor 1                           | Lefty1     | 3.15   | 2.35  | 1.18  | 1.69   | 1.45       | 2.38     | 1.11        | 1.14     | 1.26        |
| 1451767_at   | neutrophil cytosolic factor 1                               | Ncf1       | 1.44   | 3.10  | 4.00  | -1.57  | 1.08       | 1.71     | 1.29        | 1.78     | 2.6         |
| 1448966_a_at | nuclear factor of activated T-cells 5                       | Nfat5      | 1.38   | 2.02  | 1.08  | 1.68   | 3.6        | 2.58     | -1.52       | 2.77     | 1.42        |
| 1418162_at   | toll-like receptor 4                                        | Tlr4       | 1.82   | 1.81  | -1.04 | 1.16   | 1.2        | 1.38     | 1.28        | 1.21     | 1.04        |
| 1416016_at   | transporter 1, ATP-binding cassette, sub-family B (MDR/TAP) | Tap1       | 1.55   | 1.24  | 1.47  | -1.43  | 2.37       | 3.46     | 2.76        | -1.03    | 1.32        |

### Somatotroph axis

| code         | Gene Title                                                      | Gene Symbo | Kidney | Liver | Lung  | Spleen | WT_0.6J | WT_4J | XPA_0.6J | CSB_0.6J | DKO_0.6J |
|--------------|-----------------------------------------------------------------|------------|--------|-------|-------|--------|---------|-------|----------|----------|----------|
| 1426719_at   | amyloid beta (A4) precursor protein-binding, family B, member 2 | Apbb2      | -1.13  | -1.20 | -1.30 | -1.33  | -1.01   | -4.25 | -2.24    | -2.8     | -2.92    |
| 1434310_at   | bone morphogenic protein receptor, type II                      | Bmpr2      | -1.06  | 1.10  | -1.33 | -1.15  | -1.04   | -1.49 | -1.25    | -1.18    | -1.44    |
| 1427043_s_at | cytosolic ovarian carcinoma antigen 1                           | Cova1      | -1.20  | -1.10 | -1.32 | -1.25  | -1.41   | -2.99 | -1.37    | -1.69    | -1.63    |
| 1428011_a_at | ErbB2 interacting protein                                       | ErbB2ip    | -1.13  | 1.08  | -1.19 | -1.36  | -1.08   | -1.21 | -1.08    | -1.24    | -1.11    |
| 1417558_at   | Fyn proto-oncogene                                              | Fyn        | -1.11  | 1.14  | -1.02 | -1.26  | -1.09   | -2.24 | -1.93    | -1.85    | -2.13    |
| 1417673_at   | growth factor receptor bound protein 14                         | Grb14      | -1.13  | -1.31 | -1.12 | -1.66  | 1.1     | -1.21 | -1.18    | -1.13    | -1.12    |
| 1417962_s_at | growth hormone receptor                                         | Ghr        | 1.10   | -1.47 | -1.27 | -1.15  | -1.11   | -2.65 | -1.58    | -1.65    | -2.04    |
| 1453771_at   | GULP, engulfment adaptor PTB domain containing 1                | Gulp1      | 1.12   | -1.82 | -1.32 | -1.30  | 1.03    | -1.71 | -1.19    | -1.19    | -1.22    |
| 1418349_at   | heparin-binding EGF-like growth factor                          | Hbegf      | -1.56  | 1.14  | -1.33 | -1.02  | -1.05   | -1.44 | -1.22    | -1.33    | -1.22    |
| 1423756_s_at | insulin-like growth factor binding protein 4                    | Igfbp4     | -1.21  | -1.16 | -1.05 | -1.29  | -1.12   | -1.26 | 1.01     | -1.08    | 1.01     |
| 1452108_at   | insulin-like growth factor I receptor                           | Igf1r      | -1.74  | -1.50 | -1.01 | -1.02  | -1.16   | -1.73 | -1.1     | -1.45    | -1.55    |

|              |                                                                      |          |       |       |       |       |       |       |       |       |       |
|--------------|----------------------------------------------------------------------|----------|-------|-------|-------|-------|-------|-------|-------|-------|-------|
| 1429062_at   | kinesin family member 16B                                            | Kif16b   | -1.12 | -1.17 | 1.10  | -1.22 | -1.01 | -2.43 | 1.13  | -1.28 | -1.91 |
| 1444285_at   | Mortality factor 4 like 1                                            | Morf4l1  | -1.69 | 1.36  | -1.93 | -1.48 | -1.08 | -1.54 | -1.91 | -2.37 | -2.07 |
| 1435771_at   | phospholipase C, beta 4                                              | Plcb4    | -1.03 | 1.38  | -1.26 | -1.54 | -1.02 | -1.48 | -1.22 | -1.33 | -1.38 |
| 1437113_s_at | phospholipase D1                                                     | Pld1     | -1.03 | 1.15  | -1.62 | -1.29 | -1.08 | -2.05 | -1.5  | -1.11 | 1.22  |
| 1452878_at   | protein kinase C, epsilon                                            | Prkce    | -1.26 | -1.00 | -1.12 | -1.20 | -1.75 | -5.11 | -1.19 | -1.78 | -1.69 |
| 1434669_at   | Ral GEF with PH domain and SH3 binding motif 1                       | Ralgps1  | -1.20 | -1.46 | 1.07  | -1.39 | -1.03 | -2.96 | -1.05 | -1.21 | 1.1   |
| 1422785_at   | RAS p21 protein activator 2                                          | Rasa2    | 1.05  | -1.04 | -1.21 | -1.98 | -1.04 | -1.24 | -1.23 | -1.32 | -1.25 |
| 1459056_at   | RAS protein-specific guanine nucleotide-releasing factor 1           | Rasgrf1  | -3.31 | -1.67 | -1.38 | -1.01 | -1.29 | -2.55 | 2.22  | -1.58 | 1.02  |
| 1438030_at   | RAS, guanyl releasing protein 3                                      | Rasgrp3  | -1.07 | -1.03 | -1.06 | -1.50 | 1.2   | -1.18 | -1.01 | 1.09  | -1.2  |
| 1446965_at   | Rho guanine nucleotide exchange factor (GEF) 12                      | Arhgef12 | -1.21 | -1.30 | -1.73 | 2.03  | -1.37 | -1.29 | -1.12 | -1.02 | -1.24 |
| 1428822_a_at | sorting nexin 24                                                     | Snx24    | -1.26 | 1.11  | -1.36 | -1.06 | -1.09 | -1.98 | -1.53 | -1.58 | -1.83 |
| 1438470_at   | suppressor of cytokine signaling 2                                   | Socs2    | -1.07 | -2.39 | -1.54 | -1.44 | 1.33  | -1.35 | 1.05  | -1.21 | -1.37 |
| 1457173_at   | Tyrosine 3-monooxygenase/tryptophan 5-monooxygenase activation Ywhae | Ywhae    | -1.41 | 1.42  | -1.55 | -1.25 | -1.02 | -1.46 | -1.12 | 1.26  | -1.64 |
| 1448670_at   | ubiquitin-conjugating enzyme E2E 3, UBC4/5 homolog (yeast)           | Ube2e3   | -1.08 | -1.09 | -1.10 | 1.55  | -1.07 | -1.24 | -1.02 | -1.18 | -1.13 |
| 1440348_at   | zinc finger, FYVE domain containing 9                                | Zfyve9   | -1.16 | -1.13 | -1.23 | -1.27 | -1.13 | -1.31 | -1.17 | -1.29 | -1.1  |

#### Lipid metabolism

| code         | Gene Title                                       | Gene Symbo | Kidney | Liver | Lung  | Spleen | WT_0.6J | WT_4J | XPA_0.6J | CSB_0.6J | DKO_0.6J |
|--------------|--------------------------------------------------|------------|--------|-------|-------|--------|---------|-------|----------|----------|----------|
| 1433444_at   | 3-hydroxy-3-methylglutaryl-Coenzyme A synthase 1 | Hmgcs1     | -1.07  | 1.40  | -1.06 | -1.86  | -1.07   | -1.38 | -1.19    | -1.06    | -1.13    |
| 1433445_x_at | 3-hydroxy-3-methylglutaryl-Coenzyme A synthase 1 | Hmgcs1     | -1.12  | 1.39  | -1.08 | -1.91  | -1.02   | -1.27 | -1.09    | -1.11    | -1.11    |
| 1448789_at   | aldehyde dehydrogenase family 1, subfamily A3    | Aldh1a3    | -2.42  | 6.72  | -1.28 | -1.83  | -1.04   | -1.62 | -1.2     | -1.27    | -1.17    |
| 1454918_at   | alkylglycerone phosphate synthase                | Agps       | -1.37  | 1.12  | -1.34 | -1.25  | 1.02    | -1.26 | -1.2     | -1.29    | -1.42    |
| 1443546_at   | High density lipoprotein (HDL) binding protein   | Hdlbp      | -1.41  | -1.30 | -1.54 | 1.25   | -1.17   | -1.51 | -1.05    | -1.21    | 1        |
| 1434418_at   | longevity assurance homolog 6 (S. cerevisiae)    | Lass6      | -1.05  | 1.12  | -1.16 | -1.36  | -1.22   | -2.06 | -1.58    | -1.66    | -1.87    |
| 1457449_at   | Longevity assurance homolog 6 (S. cerevisiae)    | Lass6      | -2.18  | -1.04 | -1.32 | -1.07  | 1.01    | -1.31 | -1.31    | 1.26     | -1.65    |
| 1434451_at   | NOD-derived CD11c +ve dendritic cells cDNA       | ---        | -1.26  | -1.26 | -1.16 | -1.21  | -1.27   | -5.35 | -2.24    | -2.68    | -3.03    |
| 1429514_at   | phosphatidic acid phosphatase type 2B            | Ppap2b     | 1.02   | -1.01 | -1.16 | -1.37  | 1.01    | -1.45 | -1.14    | -1.27    | -1.25    |
| 1435771_at   | phospholipase C, beta 4                          | Plcb4      | -1.03  | 1.38  | -1.26 | -1.54  | -1.02   | -1.48 | -1.22    | -1.33    | -1.38    |
| 1437113_s_at | phospholipase D1                                 | Pld1       | -1.03  | 1.15  | -1.62 | -1.29  | -1.08   | -2.05 | -1.5     | -1.11    | 1.22     |
| 1427132_at   | SET binding factor 2                             | Sbf2       | -1.09  | -1.05 | -1.15 | -1.01  | 1.57    | -1.59 | -1.52    | -1.32    | -1.48    |
| 1417696_at   | sterol O-acyltransferase 1                       | Soat1      | -1.28  | 1.40  | -1.11 | -1.00  | -1.05   | -1.37 | -1.13    | -1.18    | -1.09    |
| 1436499_at   | transmembrane protein 23                         | Tmem23     | -1.08  | 1.12  | -1.07 | -1.76  | -1.08   | -1.53 | -1.38    | -1.61    | -1.55    |
| 1416934_at   | X-linked myotubular myopathy gene 1              | Mtm1       | -1.36  | -1.20 | -1.00 | 1.16   | -1.06   | -1.91 | -1.08    | -1.18    | -1.24    |

#### (Oxidative) metabolism

| code | Gene Title | Gene Symbo | Kidney | Liver | Lung | Spleen | WT_0.6J | WT_4J | XPA_0.6J | CSB_0.6J | DKO_0.6J |
|------|------------|------------|--------|-------|------|--------|---------|-------|----------|----------|----------|
|------|------------|------------|--------|-------|------|--------|---------|-------|----------|----------|----------|

|              |                                                             |             |       |       |       |       |       |       |       |       |       |
|--------------|-------------------------------------------------------------|-------------|-------|-------|-------|-------|-------|-------|-------|-------|-------|
| 1435967_s_at | 3-hydroxyisobutyrate dehydrogenase                          | Hibadh      | -1.14 | -1.11 | 1.04  | -1.25 | -1.18 | -1.41 | -1.06 | -1.06 | 1     |
| 1437082_at   | A kinase (PRKA) anchor protein (yotiao) 9                   | Akap9       | 1.10  | -1.22 | -1.43 | -1.27 | 1.05  | -2    | -1.47 | -1.23 | -1.16 |
| 1426339_at   | adenylate kinase 5                                          | Ak5         | 1.14  | -2.44 | -1.87 | -1.66 | -1.14 | -1.3  | -1.07 | 1.06  | -1.17 |
| 1457827_at   | arylsulfatase J                                             | Arsj        | 1.48  | -1.57 | -1.87 | -1.68 | -1.08 | -1.64 | -1.01 | -1.12 | -1.2  |
| 1455083_at   | Atpase, class VI, type 11C                                  | Atp11c      | 1.02  | -1.05 | -1.20 | -1.11 | 1.06  | -1.34 | -1.23 | -1.17 | -1.19 |
| 1419922_s_at | attractin like 1                                            | Atrnl1      | 1.06  | -1.04 | -1.24 | -1.45 | -1.14 | -1.39 | -1.18 | -1.17 | -1.32 |
| 1421422_at   | cDNA sequence AF397014                                      | AF397014    | -1.12 | -1.73 | 1.06  | -2.08 | -1.01 | -1.4  | 1.02  | -1.03 | 1.66  |
| 1426307_at   | cytochrome b5 reductase 4                                   | Cyb5r4      | -1.15 | -1.04 | -1.03 | -1.29 | -1.01 | -1.14 | 1.02  | -1.03 | -1.04 |
| 1429064_at   | DIP2 disco-interacting protein 2 homolog C (Drosophila)     | Dip2c       | -1.24 | -1.09 | -1.51 | 1.21  | -1.44 | -3.12 | -1.41 | -1.55 | -1.99 |
| 1458177_at   | emopamil binding protein-like                               | Ebpl        | -1.00 | 1.30  | -2.26 | -1.78 | -2.14 | -2.25 | -2.9  | 1.43  | -1.09 |
| 1434335_at   | expressed sequence AI317237                                 | AI317237    | 1.04  | -1.08 | -1.02 | -1.49 | -1.17 | -1.64 | -1.18 | -1.5  | -1.38 |
| 1417434_at   | glycerol phosphate dehydrogenase 2, mitochondrial           | Gpd2        | -1.14 | -1.55 | 1.14  | -1.30 | 1.05  | -1.29 | -1.13 | -1.12 | -1.2  |
| 1450730_at   | heparan sulfate 2-O-sulfotransferase 1                      | Hs2st1      | -1.08 | -1.10 | -1.23 | -1.08 | 1.03  | -1.27 | -1.2  | -1.04 | -1.27 |
| 1438726_at   | microtubule associated monooxygenase 2                      | Mical2      | -1.53 | -1.30 | -1.60 | 1.41  | -1.15 | -2.13 | -1.82 | -2.08 | -1.58 |
| 1442364_at   | Mitogen activated protein kinase 14                         | Mapk14      | -1.08 | -1.83 | -1.53 | -2.69 | -1.02 | -2.29 | -1.12 | 1.91  | 1.51  |
| 1428667_at   | monoamine oxidase A                                         | Maoa        | -1.03 | -1.07 | -1.16 | -1.01 | -1.06 | -1.21 | 1.04  | -1.07 | -1.11 |
| 1423144_at   | phosphatidylinositol 3-kinase, catalytic, alpha polypeptide | Pik3ca      | -1.05 | 1.02  | -1.23 | -1.33 | -1.12 | -1.22 | -1.1  | -1.08 | -1.1  |
| 1455204_at   | phosphatidylinositol transfer protein, cytoplasmic 1        | Pitpnc1     | -1.18 | 1.11  | -1.36 | -1.11 | -1.07 | -3.71 | -1.77 | -2.02 | -2.17 |
| 1451405_at   | propionyl-Coenzyme A carboxylase, alpha polypeptide         | Pcca        | -1.01 | -1.17 | 1.11  | -1.23 | 1.04  | -1.4  | -1.16 | -1.15 | -1.28 |
| 1424488_a_at | pyrophosphatase (inorganic) 2                               | Ppa2        | -1.08 | -1.14 | -1.21 | -1.03 | -1.04 | -1.14 | -1.02 | -1.04 | -1.03 |
| 1452703_at   | RIKEN cDNA 4631427C17 gene                                  | 4631427C17F | -1.11 | -1.13 | -1.05 | 1.07  | -1.18 | -1.57 | -1.05 | -1.07 | 1.04  |
| 1460243_at   | serine palmitoyltransferase, long chain base subunit 2      | Sptlc2      | -1.08 | 1.07  | -1.06 | -1.17 | 1.01  | -1.27 | -1.18 | -1.11 | -1.24 |
| 1425388_a_at | thiamine pyrophosphokinase                                  | Tpk1        | -1.18 | -1.18 | -1.09 | 1.12  | -1.26 | -2.32 | -1.05 | -1.38 | -1.32 |

### Ubiquitin cycle

| code         | Gene Title                                           | Gene Symbo      | Kidney | Liver | Lung  | Spleen | WT_0.6J | WT_4J | XPA_0.6J | CSB_0.6J | DKO_0.6J |
|--------------|------------------------------------------------------|-----------------|--------|-------|-------|--------|---------|-------|----------|----------|----------|
| 1455082_at   | Casitas B-lineage lymphoma b                         | Cblb            | 1.06   | -1.03 | -1.10 | -1.19  | -1.07   | -1.69 | -1.41    | -1.48    | -1.97    |
| 1434718_at   | cullin 3                                             | Cul3            | -1.19  | -1.21 | -1.10 | -1.15  | -1.06   | -1.34 | 1.02     | -1.19    | -1.2     |
| 1458464_at   | HECT, C2 and WW domain E3 ubiquitin protein ligase 2 | Hecw2           | -1.07  | -1.23 | -1.95 | -1.84  | -1.37   | -1.66 | -1.04    | 1.17     | 1.76     |
| 1440582_at   | itchy /// RIKEN cDNA 8030492O04 gene                 | Itch /// 803049 | -1.80  | -1.52 | -1.72 | -1.58  | -1.06   | -1.75 | -1.06    | -1.04    | -1.48    |
| 1431367_at   | membrane-associated ring finger (C3HC4) 1            | 1-Mar           | -1.30  | 1.38  | -1.17 | -1.93  | -1.11   | -1.88 | 1.01     | -1.58    | -1.01    |
| 1442858_at   | Pam, highwire, rpm 1                                 | Phr1            | -1.17  | -1.05 | -1.20 | -1.53  | -1.23   | -2.08 | -1.04    | -1.15    | -1.7     |
| 1418695_a_at | potassium channel modulatory factor 1                | Kcmf1           | -1.02  | -1.00 | -1.13 | -1.04  | -1.04   | -1.11 | -1.08    | -1.17    | -1.03    |
| 1444085_at   | prenyl (solanesyl) diphosphate synthase, subunit 2   | Pdss2           | -1.19  | -1.10 | -1.17 | 1.30   | -1.39   | -2.7  | -1.5     | -1.35    | -1.18    |
| 1424134_at   | ring finger and SPRY domain containing 1             | Rspry1          | -1.01  | -1.07 | -1.03 | 1.20   | 1.02    | -1.25 | -1.2     | -1.07    | -1.14    |
| 1428070_at   | synovial apoptosis inhibitor 1, synoviolin           | Syvn1           | -1.03  | -1.14 | 1.50  | -1.08  | -1.23   | -1.42 | -1.05    | -1.03    | -1.01    |



|              |                                                                 |               |       |       |       |       |       |       |       |       |       |
|--------------|-----------------------------------------------------------------|---------------|-------|-------|-------|-------|-------|-------|-------|-------|-------|
| 1434839_s_at | transducin (beta)-like 1X-linked receptor 1                     | Tbl1xr1       | -1.27 | -1.13 | -1.08 | -1.24 | -1.1  | -1.71 | 1.04  | 1.01  | -1.12 |
| 1450066_at   | ubiquitin protein ligase E3 component n-recognin 1              | Ubr1          | -1.18 | -1.06 | -1.33 | -1.30 | 1.01  | -1.2  | -1.09 | -1.05 | -1.11 |
| 1434392_at   | ubiquitin specific peptidase 34                                 | Usp34         | -1.08 | -1.09 | -1.28 | -1.13 | -1.07 | -1.55 | -1.29 | -1.46 | -1.65 |
| 1424358_at   | ubiquitin-conjugating enzyme E2E 2 (UBC4/5 homolog, yeast)      | Ube2e2        | -1.00 | -1.05 | -1.35 | -2.41 | -1.34 | -2.76 | -1.43 | -1.63 | -1.7  |
| 1448670_at   | ubiquitin-conjugating enzyme E2E 3, UBC4/5 homolog (yeast)      | Ube2e3        | -1.08 | -1.09 | -1.10 | 1.55  | -1.07 | -1.24 | -1.02 | -1.18 | -1.13 |
| 1435608_at   | zinc and ring finger 3 /// similar to Goliath homolog precursor | Znrf3 /// LOC | -1.12 | -1.40 | -1.17 | -1.02 | -1.05 | -1.27 | -1.05 | -1.3  | -1.21 |

**Supplementary table 7.** Significantly overrepresented processes between upregulated genes in cells irradiated with 4J/m<sup>2</sup> of UV and livers of long-lived mice

| <b>Over-represented biological processes</b>      | <b>Relative enrichment (%)</b> | <b>p-value</b> |
|---------------------------------------------------|--------------------------------|----------------|
| GO:0002376~immune system process                  | 5.64%                          | 0.00054        |
| GO:0006954~inflammatory response                  | 1.91%                          | 0.00064        |
| GO:0006119~oxidative phosphorylation              | 0.77%                          | 0.00637        |
| GO:0051276~chromosome organization and biogenesis | 2.96%                          | 0.00090        |
| GO:0006325~maintenance of chromatin architecture  | 2.32%                          | 0.00013        |
| GO:0006350~transcription                          | 15.52%                         | 0.00000        |
| GO:0006397~mRNA processing                        | 2.23%                          | 0.00001        |
| GO:0006915~apoptosis                              | 5.37%                          | 0.00000        |
| GO:0006950~response to stress                     | 6.28%                          | 0.00000        |
| GO:0006974~response to DNA damage stimulus        | 2.14%                          | 0.00069        |
| GO:0007049~cell cycle                             | 6.19%                          | 0.00000        |
| GO:0007067~mitosis                                | 1.59%                          | 0.00248        |
| GO:0008219~cell death                             | 5.78%                          | 0.00000        |
| GO:0019538~protein metabolic process              | 18.84%                         | 0.00008        |

## Supplementary table 8. Biological processes involved in the response to Hydrogen Peroxide treatment

Gray color: fold change: >1.2; p<0.05

### Response to oxidative stress

| code         | Gene Title                                | Gene Symbo | Biological Process (GO)              | wt10/wt0 | p-value | wt50/wt0 | p-value |
|--------------|-------------------------------------------|------------|--------------------------------------|----------|---------|----------|---------|
| 1416429_a_at | catalase                                  | Cat        | 6979 // response to oxidative stress | 1.10     | 0.5674  | 2.50     | 0.0267  |
| 1421817_at   | glutathione reductase 1                   | Gsr        | 6749 // glutathione metabolism       | 1.25     | 0.0266  | 2.46     | 0.0158  |
| 1416531_at   | glutathione S-transferase omega 1         | Gsto1      | 6749 // glutathione metabolism       | 1.03     | 0.5680  | 1.33     | 0.0000  |
| 1421041_s_at | glutathione S-transferase, alpha 2 (Yc2)  | Gsta2      | 6749 // glutathione metabolism       | 1.60     | 0.0943  | 16.67    | 0.0393  |
| 1416368_at   | glutathione S-transferase, alpha 4        | Gsta4      | 6749 // glutathione metabolism       | 1.28     | 0.0082  | 6.48     | 0.0011  |
| 1448330_at   | glutathione S-transferase, mu 1           | Gstm1      | 6749 // glutathione metabolism       | 1.12     | 0.3652  | 2.48     | 0.0023  |
| 1425946_at   | glutathione S-transferase, mu 7           | Gstm7      | 6749 // glutathione metabolism       | 1.92     | 0.6486  | 2.02     | 0.0329  |
| 1448239_at   | heme oxygenase (decycling) 1              | Hmox1      | 6788 // heme oxidation               | 1.48     | 0.0776  | 6.48     | 0.0003  |
| 1423291_s_at | hypoxia up-regulated 1                    | Hyou1      | 6950 // response to stress           | 1.03     | 0.7671  | 1.20     | 0.0076  |
| 1415897_a_at | microsomal glutathione S-transferase 1    | Mgst1      | 6749 // glutathione metabolism       | 1.18     | 0.1052  | 2.46     | 0.0197  |
| 1433866_x_at | peroxiredoxin 1                           | Prdx1      | 6979 // response to oxidative stress | 1.13     | 0.3504  | 2.15     | 0.0053  |
| 1442001_at   | protein kinase, AMP-activated             | Prkab2     | 6950 // response to stress           | -1.03    | 0.8018  | 1.38     | 0.0112  |
| 1440222_at   | superoxide dismutase 1, soluble           | Sod1       | 6979 // response to oxidative stress | 1.41     | 0.4229  | 4.93     | 0.0373  |
| 1415996_at   | thioredoxin interacting protein           | Txnip      | 6979 // response to oxidative stress | -1.09    | 0.1306  | 1.88     | 0.0193  |
| 1460725_at   | xeroderma pigmentosum, compl/tion group A | Xpa        | 6979 // response to oxidative stress | -1.06    | 0.8263  | 1.24     | 0.0032  |

### Absence of GH/IGF1 axis attenuation

| code         | Gene Title                                                 | Gene Symbo | Biological Process (GO)                  | wt10/wt0 | p-value | wt50/wt0 | p-value |
|--------------|------------------------------------------------------------|------------|------------------------------------------|----------|---------|----------|---------|
| 1451959_a_at | vascular endothelial growth factor A                       | Vegfa      | 8151 // cell growth/maintenance          | -1.05    | 0.2503  | 1.94     | 0.0587  |
| 1420894_at   | transforming growth factor, beta receptor I                | Tgfb1      | 6468 // protein amino acid phosph.       | 1.21     | 0.7330  | 1.72     | 0.2144  |
| 1450421_at   | transforming growth factor alpha                           | Tgfa       | 8283 // cell proliferation               | -1.39    | 0.1700  | 1.61     | 0.3562  |
| 1450226_at   | prolactin receptor                                         | Prlr       | 7595 // lactation                        | 1.29     | 0.9512  | 1.11     | 0.7529  |
| 1450414_at   | platelet derived growth factor, B polypeptide              | Pdgfb      | 8283 // cell proliferation               | -1.12    | 0.2970  | 1.53     | 0.2855  |
| 1418711_at   | platelet derived growth factor, alpha                      | Pdgfa      | 8283 // cell proliferation               | 1.06     | 0.4172  | 1.72     | 0.0158  |
| 1438946_at   | platelet derived growth factor receptor, alpha polypeptide | Pdgfra     | 7169 // tyrosine kinase signaling path.  | -1.07    | 0.5182  | 1.36     | 0.2966  |
| 1438312_s_at | latent transforming growth factor beta binding protein 3   | Ltbp3      | 7179 // TGFbeta receptor signaling path. | -1.01    | 0.8871  | 1.48     | 0.0169  |
| 1446232_at   | Latent transforming growth factor beta binding protein 1   | Ltbp1      | 7179 // TGFbeta receptor signaling path. | 4.17     | 0.0401  | 1.82     | 0.0694  |
| 1458268_s_at | insulin-like growth factor binding protein 3               | Igfbp3     | 1558 // regulation of cell growth        | 1.26     | 0.1710  | 2.51     | 0.0662  |
| 1459825_x_at | insulin-like growth factor 2, binding protein 1            | Igf2bp1    | 1558 // regulation of cell growth        | 2.12     | 0.2886  | 1.51     | 0.3116  |
| 1424111_at   | insulin-like growth factor 2 receptor                      | Igf2r      | 6810 // transport                        | 1.08     | 0.4163  | 1.30     | 0.1672  |

|              |                                                        |          |                                       |       |        |      |        |
|--------------|--------------------------------------------------------|----------|---------------------------------------|-------|--------|------|--------|
| 1452014_a_at | insulin-like growth factor 1                           | Igf1     | 48009 // IGF receptor signaling path. | 1.01  | 0.9103 | 1.02 | 0.9086 |
| 1423252_at   | hepatoma-derived growth factor, related protein 3      | Hdgfrp3  | 8283 // cell proliferation            | -1.05 | 0.6903 | 1.31 | 0.0105 |
| 1421294_at   | hepatoma derived growth factor-like 1                  | Hdgfl1   | 8283 // cell proliferation            | 1.18  | 0.7904 | 3.58 | 0.1768 |
| 1451501_a_at | Growth hormone receptor                                | Ghr      | 8151 // cell growth/maintenance       | 1.05  | 0.3342 | 1.05 | 0.6787 |
| 1425457_a_at | growth factor receptor bound protein 10                | Grb10    | 48009 // IGF receptor signaling path. | -1.04 | 0.3803 | 1.66 | 0.8047 |
| 1427777_x_at | fibroblast growth factor receptor 4                    | Fgfr4    | 6468 // protein amino acid phosph.    | 2.95  | 0.3887 | 3.61 | 0.2401 |
| 1424050_s_at | fibroblast growth factor receptor 1                    | Fgfr1    | 6468 // protein amino acid phosph.    | 1.03  | 0.8900 | 1.58 | 0.2836 |
| 1451693_a_at | fibroblast growth factor 12                            | Fgf12    | 6468 // protein amino acid phosph.    | 1.56  | 0.7102 | 1.71 | 0.4570 |
| 1450869_at   | fibroblast growth factor 1                             | Fgf1     | 6468 // protein amino acid phosph.    | -1.35 | 0.0954 | 1.52 | 0.6407 |
| 1438924_x_at | Fibroblast growth factor intracellular binding protein | Fibp     | 6468 // protein amino acid phosph.    | 2.12  | 0.6817 | 1.76 | 0.6089 |
| 1422824_s_at | epidermal growth factor receptor pathway substrate 8   | Eps8     | 6508 // proteolysis and peptidolysis  | 1.24  | 0.1430 | 1.88 | 0.1679 |
| 1437769_at   | Epidermal growth factor receptor pathway substrate 15  | Eps15-rs | ---                                   | 1.04  | 0.9222 | 1.30 | 0.6014 |
| 1457563_at   | epidermal growth factor receptor                       | Egfr     | 8283 // cell proliferation            | 2.12  | 0.2243 | 1.36 | 0.4156 |
| 1435541_at   | betacellulin, epidermal growth factor family member    | Btc      | 8283 // cell proliferation            | 1.05  | 0.6876 | 2.41 | 0.0171 |

## DNA Repair

| code         | Gene Title                                             | Gene Symbo | Biological Process (GO)            | wt10/wt0 | p-value | wt50/wt0 | p-value |
|--------------|--------------------------------------------------------|------------|------------------------------------|----------|---------|----------|---------|
| 1430078_a_at | 8-oxoguanine DNA-glycosylase 1                         | Ogg1       | 6284 // base-excision repair       | 1.14     | 0.5054  | 1.85     | 0.0384  |
| 1460725_at   | xeroderma pigmentosum, complementation group A         | Xpa        | 6289 // nucleotide-excision repair | -1.06    | 0.8263  | 1.24     | 0.0032  |
| 1437715_x_at | apurinic/aprimidinic endonuclease 1                    | Apex1      | 6281 // DNA repair                 | 1.04     | 0.4128  | -1.32    | 0.0106  |
| 1440383_at   | DNA cross-link repair 1B, PSO2 homolog (S. cerevisiae) | Dclre1b    | 6289 // nucleotide-excision repair | -1.07    | 0.2950  | -1.53    | 0.0465  |
| 1450935_at   | excision repair cross-complementation group 5          | Ercc5      | 6289 // nucleotide-excision repair | 1.10     | 0.0598  | 1.39     | 0.0040  |
| 1453169_a_at | general transcription factor II H, polypeptide 1       | Gtf2h1     | 6289 // nucleotide-excision repair | 1.09     | 0.4165  | 1.54     | 0.0101  |
| 1437163_x_at | general transcription factor II H, polypeptide 4       | Gtf2h4     | 6289 // nucleotide-excision repair | -1.03    | 0.6086  | -1.27    | 0.0229  |
| 1416641_at   | ligase I, DNA, ATP-dependent                           | Lig1       | 6281 // DNA repair                 | -1.11    | 0.4338  | -1.24    | 0.0295  |
| 1423419_at   | ligase III, DNA, ATP-dependent                         | Lig3       | 6281 // DNA repair                 | 1.02     | 0.7835  | -1.23    | 0.0095  |
| 1421309_at   | O-6-methylguanine-DNA methyltransferase                | Mgmt       | 6281 // DNA repair                 | 1.19     | 0.6353  | 1.35     | 0.0227  |
| 1427283_at   | myeloid/lymphoid or mixed-lineage leukemia             | Mll        | 6281 // DNA repair                 | 1.00     | 0.9591  | 1.65     | 0.0259  |
| 1431885_a_at | MUS81 endonuclease homolog (yeast)                     | Mus81      | 6281 // DNA repair                 | -1.05    | 0.3247  | -1.70    | 0.0477  |
| 1435368_a_at | poly (ADP-ribose) polymerase family, member 1          | Parp1      | 6284 // base-excision repair       | -1.07    | 0.2111  | -1.96    | 0.0441  |
| 1448650_a_at | polymerase (DNA directed), epsilon                     | Pole       | 6281 // DNA repair                 | 1.04     | 0.5677  | -1.36    | 0.0136  |
| 1450075_at   | polymerase (DNA directed), eta (RAD 30 related)        | Polh       | 6301 // postreplication repair     | 1.05     | 0.8936  | -3.26    | 0.0453  |
| 1449483_at   | polymerase (DNA directed), kappa                       | Polk       | 6281 // DNA repair                 | 1.08     | 0.1232  | 1.56     | 0.0208  |
| 1451576_at   | protein kinase, DNA activated, catalytic polypeptide   | Prkdc      | 6302 // double-strand break repair | -1.27    | 0.0371  | -1.79    | 0.0151  |
| 1448762_at   | RAD17 homolog (S. pombe)                               | Rad17      | 6281 // DNA repair                 | 1.06     | 0.0552  | 1.21     | 0.0308  |
| 1424222_s_at | RAD23b homolog (S. cerevisiae)                         | Rad23b     | 6974 // response to DNA damage     | 1.01     | 0.6842  | 1.20     | 0.0238  |
| 1443891_at   | RAD51-like 3 (S. cerevisiae)                           | Rad51l3    | 6284 // base-excision repair       | 1.48     | 0.6394  | 1.46     | 0.0362  |

|              |                                            |        |                                          |       |        |       |        |
|--------------|--------------------------------------------|--------|------------------------------------------|-------|--------|-------|--------|
| 1450862_at   | RAD54 like (S. cerevisiae)                 | Rad54l | 6281 // DNA repair                       | -1.06 | 0.8101 | -1.50 | 0.0326 |
| 1421235_s_at | RecQ protein-like 5                        | Recq15 | 6281 // DNA repair                       | -1.03 | 0.8381 | 1.33  | 0.0284 |
| 1422624_at   | REV1-like (S. cerevisiae)                  | Rev1l  | 42276 // error-prone postrep/tion repair | 1.08  | 0.3526 | 1.89  | 0.0151 |
| 1452917_at   | replication factor C (activator 1) 5       | Rfc5   | 6281 // DNA repair                       | -1.01 | 0.9730 | -1.43 | 0.0342 |
| 1451968_at   | X-ray repair cross-complementation group 5 | Xrcc5  | 6302 // double-strand break repair       | -1.02 | 0.7218 | -1.44 | 0.0259 |
