# Supplementary material
Source: PubMed Central journal article supplement (PMC2782455)

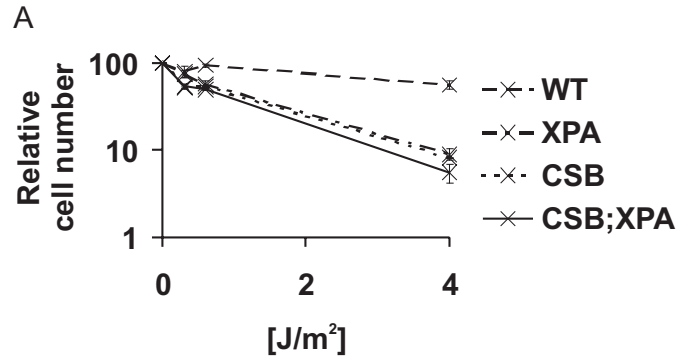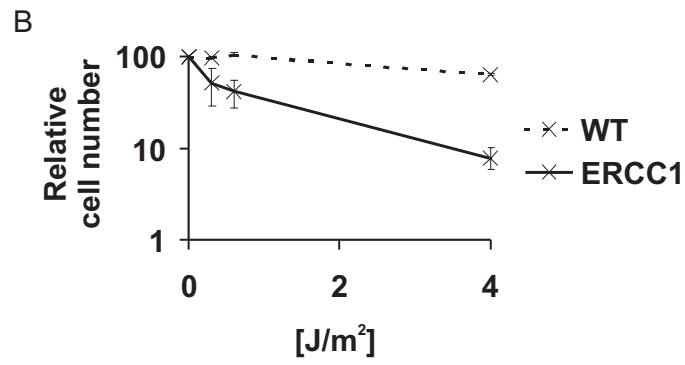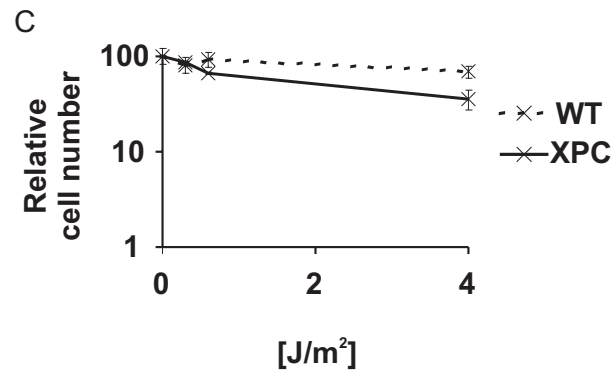

Supplement: NIHMS100614-supplement-2.pdf [file NIHMS100614-supplement-2.pdf]

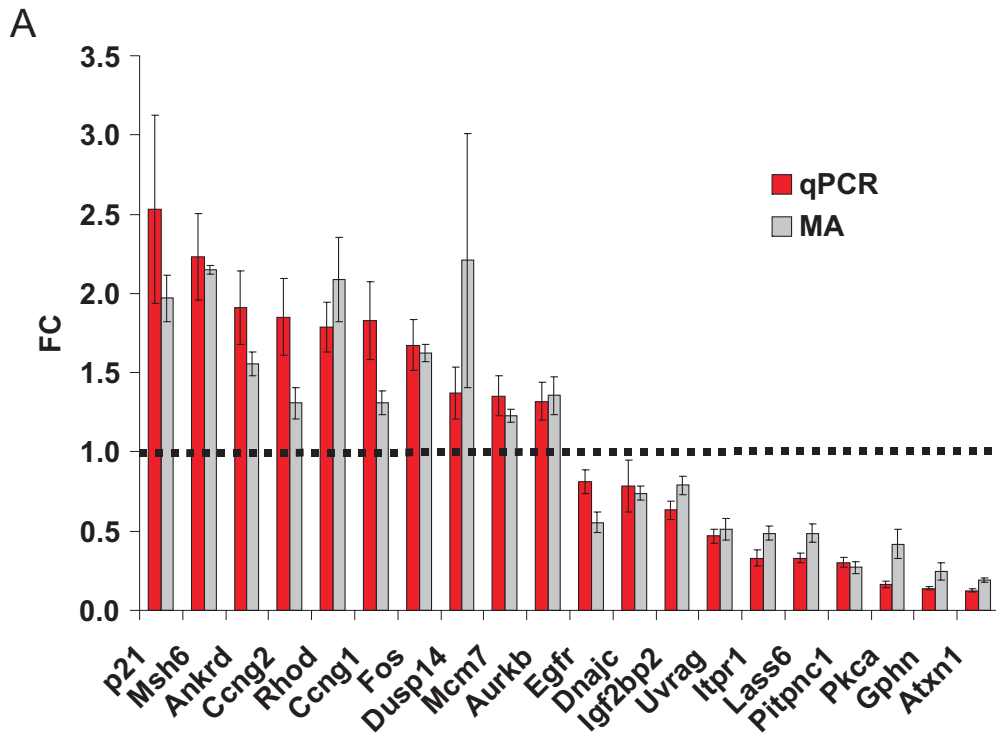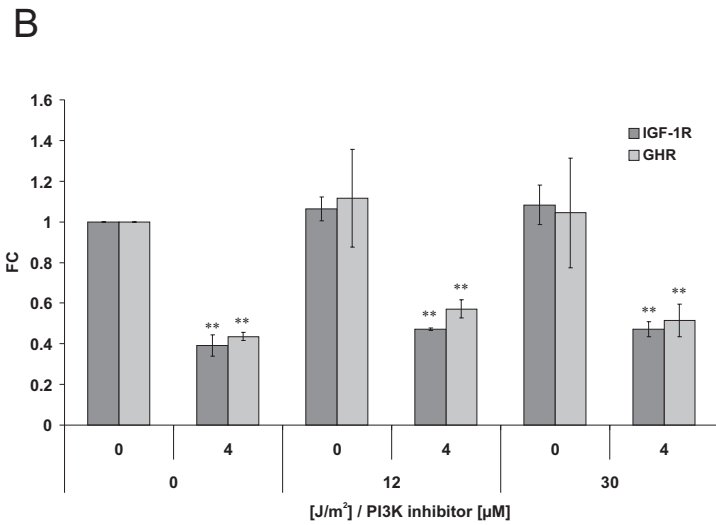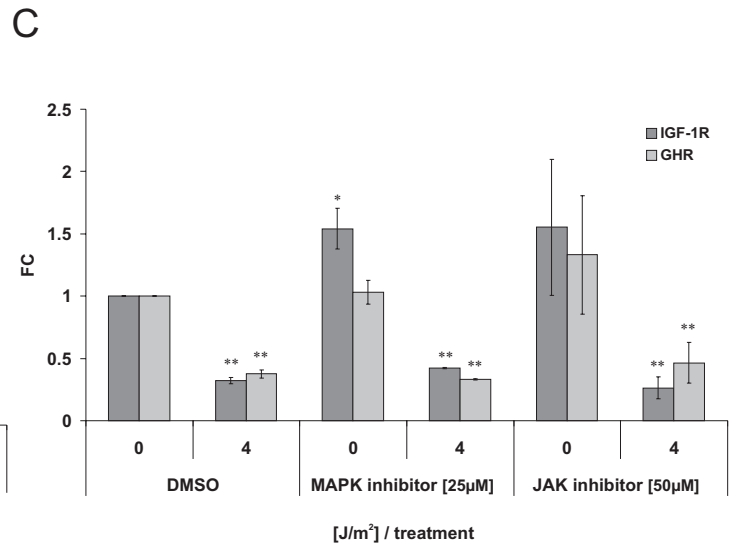

Supplement: NIHMS100614-supplement-3.pdf [file NIHMS100614-supplement-3.pdf]

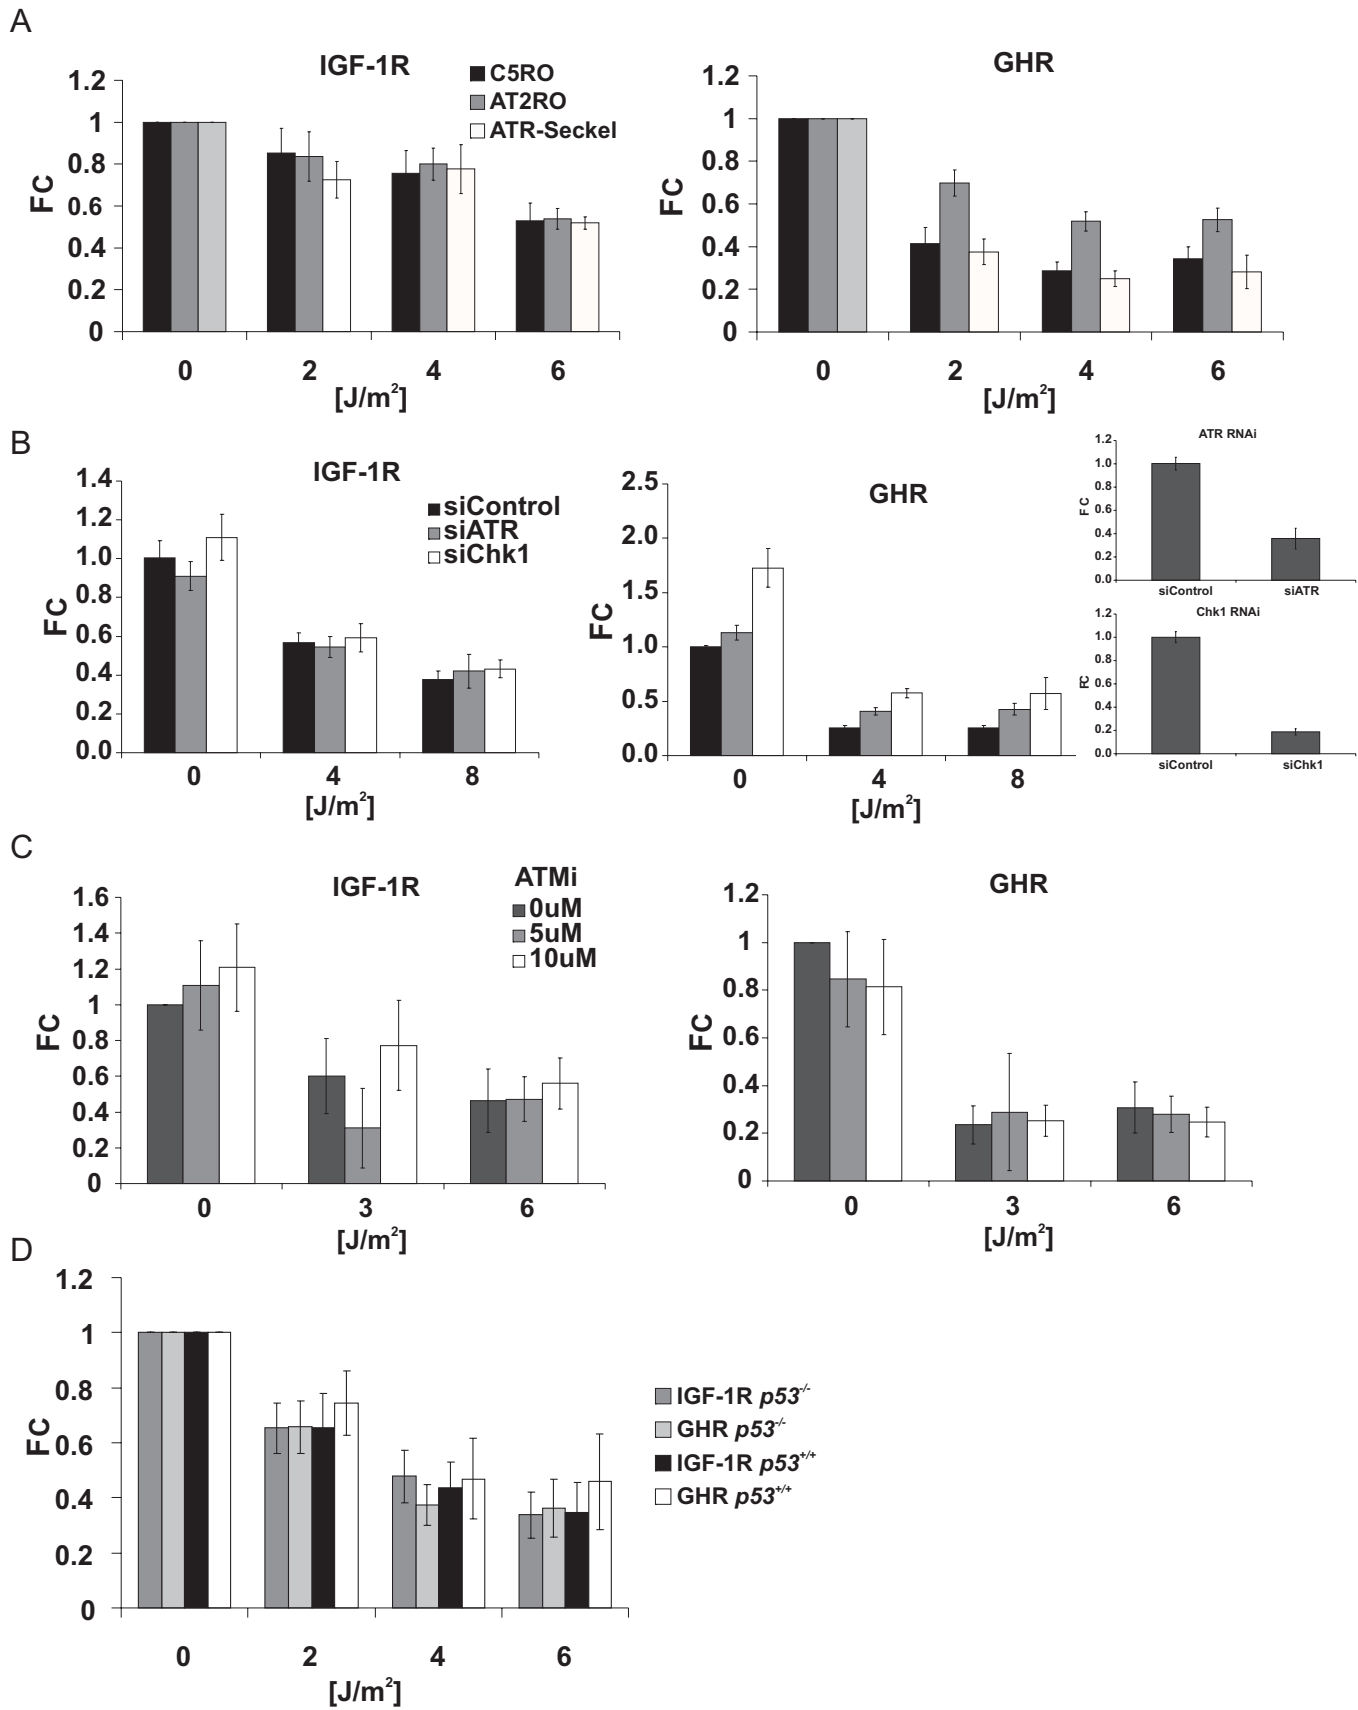

Supplement: NIHMS100614-supplement-4.pdf [file NIHMS100614-supplement-4.pdf]

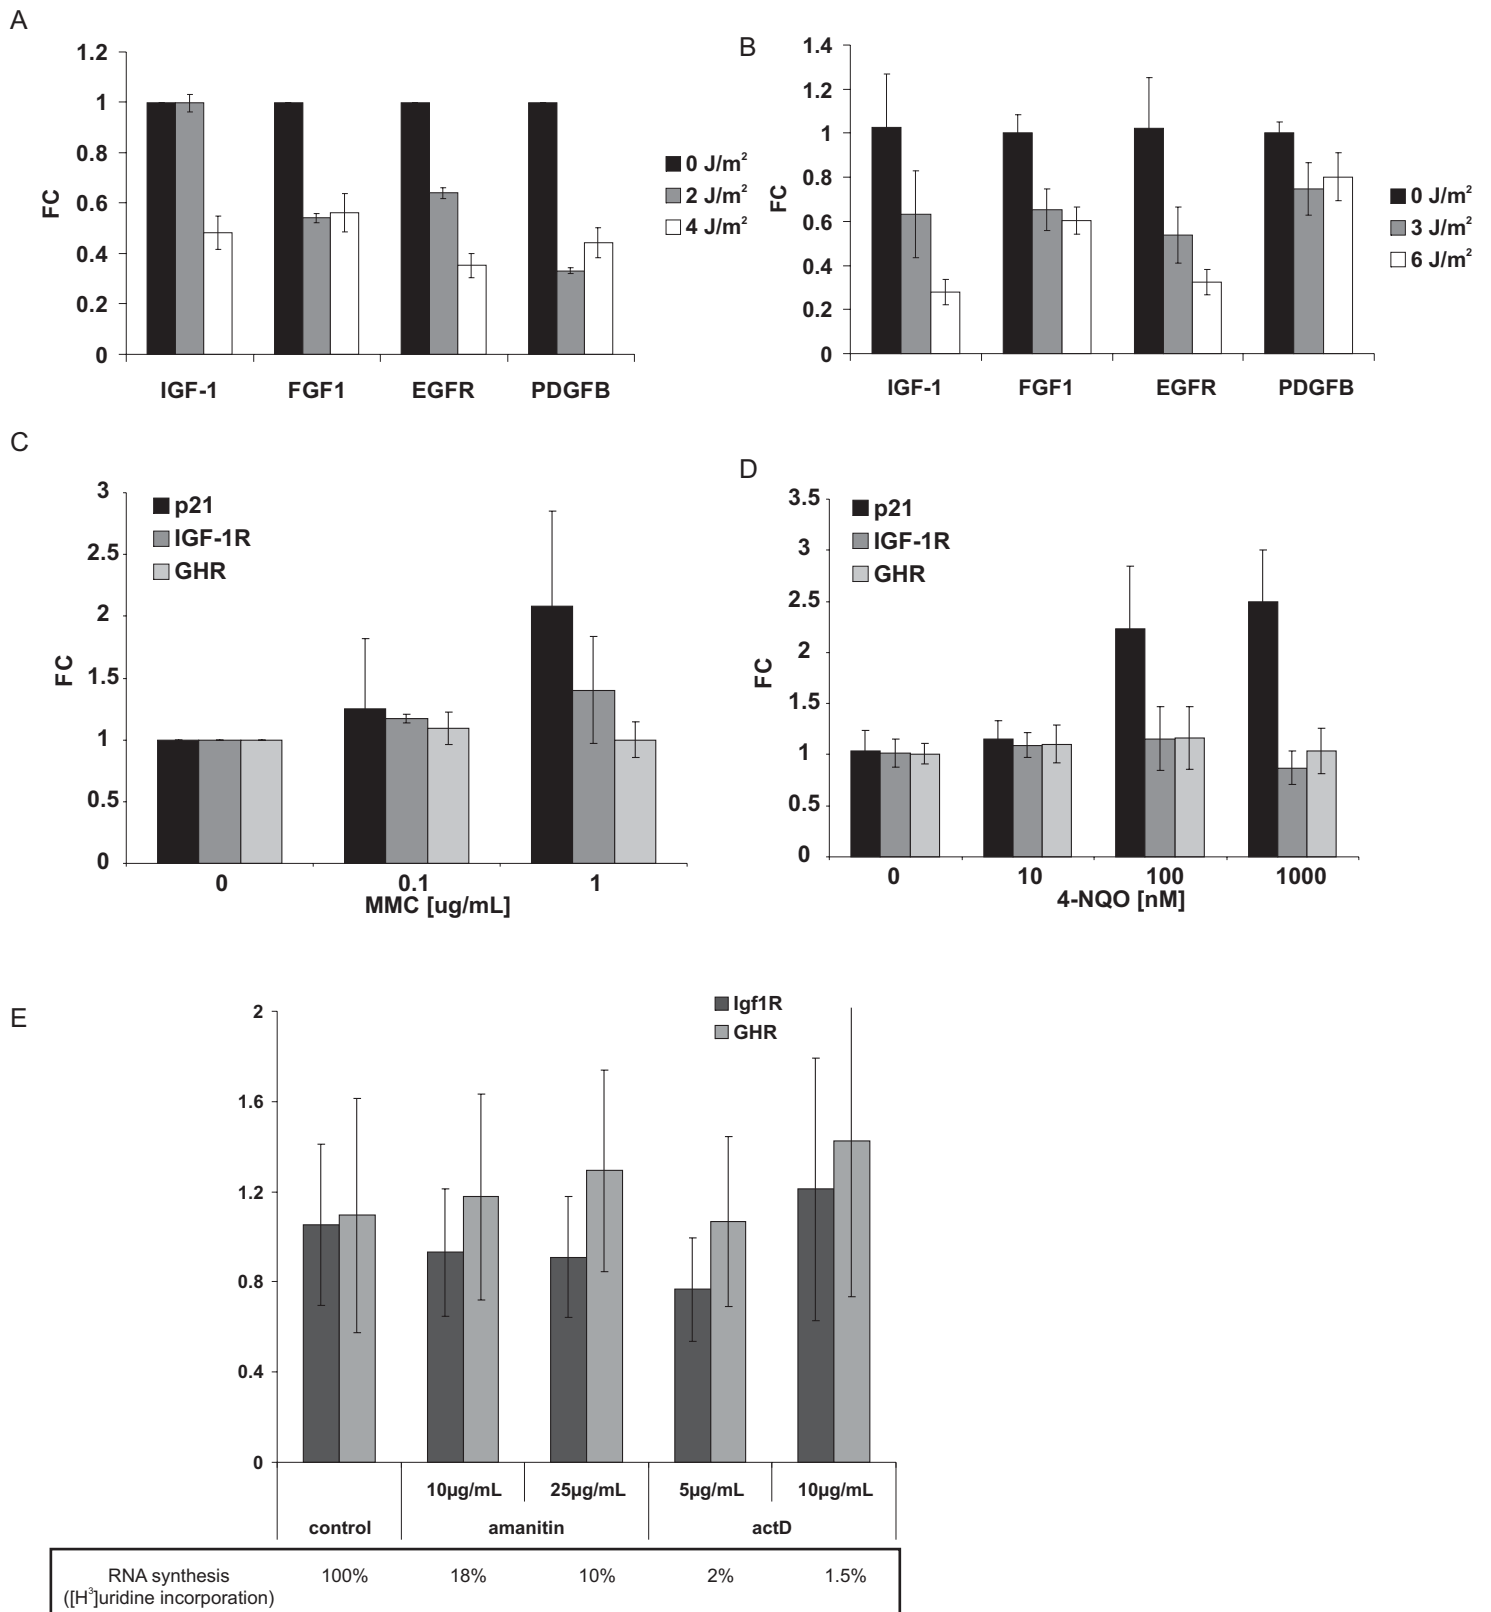

Supplement: NIHMS100614-supplement-5.pdf [file NIHMS100614-supplement-5.pdf]

Fig 2c

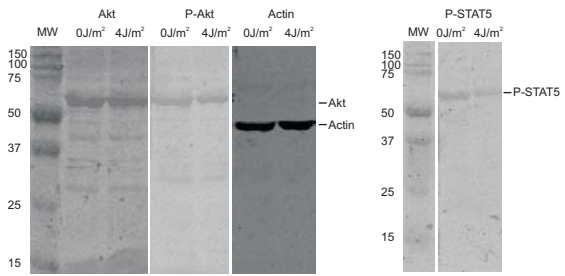

Fig 2e

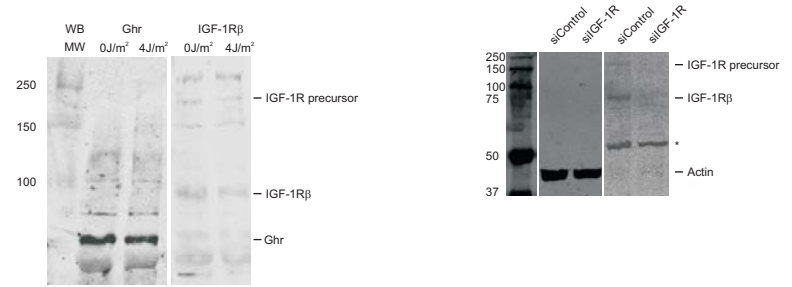

Fig 2g

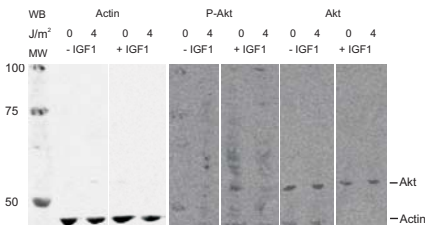

Fig 7a

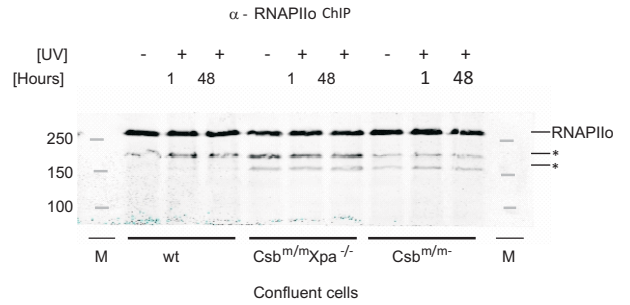

Supplement: NIHMS100614-supplement-6.pdf [file NIHMS100614-supplement-6.pdf]
